# Supplementary material for: A multi-reservoir extruder for time-resolved serial protein crystallography and compound screening at X-ray free-electron lasers
Source: Research Square preprint supplement (doi:10.21203/rs.3.rs-2621995/v1), 2023-03-09
Supplement: Supplementary file 2 [file 3ee5cc4b986800781c366c21.pdf]

**Crystallographic Table 2: Data Refinement Statistics**

|                                                       | Lysozyme (LCP)      | Lysozyme (HEC)      | KR2 (dark)          | KR2 (light)         | TD1 (apo)           | TD1 (SBTub A4)      | T <sub>2</sub> R-TTL (apo) | T <sub>2</sub> R-TTL (SolQ2 Br) | T <sub>2</sub> R-TTL (Colchicine) | T <sub>2</sub> R-TTL (Epothilone A) | T <sub>2</sub> R-TTL (Vinblastine) | T <sub>2</sub> R-TTL (Ansamitocin P3) | T <sub>2</sub> R-TTL (Cocktail) |
|-------------------------------------------------------|---------------------|---------------------|---------------------|---------------------|---------------------|---------------------|----------------------------|---------------------------------|-----------------------------------|-------------------------------------|------------------------------------|---------------------------------------|---------------------------------|
| <b>Resolution (Å)</b>                                 | 14.47 – 1.31        | 13.54 – 1.32        | 15.97 – 1.76        | 14.83 – 2.40        | 13.00 – 2.50        | 13.00 – 2.00        | 15.20 – 2.70               | 15.35 – 2.70                    | 15.18 – 3.00                      | 15.26 – 2.80                        | 15.13 – 3.20                       | 15.10 – 3.20                          | 15.29 – 2.50                    |
| <b>No. reflections</b>                                | 26527               | 25665               | 28709               | 15718               | 34519               | 68170               | 85293                      | 85186                           | 62163                             | 76658                               | 51318                              | 50716                                 | 108000                          |
| <b>R<sub>work</sub> / R<sub>free</sub> in %</b>       | 12.46 / 14.79       | 12.08 / 15.58       | 15.22 / 18.24       | 33.21 / 36.03       | 18.79 / 24.13       | 15.60 / 20.58       | 20.02 / 25.05              | 18.68 / 23.44                   | 17.37 / 23.02                     | 17.91 / 22.67                       | 20.07 / 24.79                      | 20.05 / 24.12                         | 18.54 / 23.90                   |
| <b>No. atoms</b>                                      | 1329                | 1343                | 2491                | 2394                | 8135                | 8457                | 17587                      | 17801                           | 17723                             | 18117                               | 17609                              | 17506                                 | 17984                           |
| <b>Protein</b>                                        | 1199                | 1190                | 2167                | 2095                | 7925                | 7945                | 17331                      | 17471                           | 17349                             | 17817                               | 17393                              | 17294                                 | 17456                           |
| <b>Ligands</b>                                        | 16                  | 24                  | 214                 | 236                 | 65                  | 54                  | 56                         | 56                              | 56                                | 56                                  | 56                                 | 28                                    | 56                              |
| <b>Water</b>                                          | 114                 | 129                 | 110                 | 63                  | 145                 | 424                 | 91                         | 46                              | 37                                | 44                                  | 33                                 | 4                                     | 126                             |
| <b>B-factor</b>                                       | 24.17               | 24.08               | 39.51               | 39.65               | 37.43               | 32.47               | 78.29                      | 80.46                           | 68.31                             | 67.55                               | 74.44                              | 64.38                                 | 78.83                           |
| <b>Protein</b>                                        | 21.69               | 21.08               | 36.08               | 38.36               | 37.62               | 32.33               | 78.50                      | 80.63                           | 68.46                             | 67.59                               | 74.72                              | 64.40                                 | 78.90                           |
| <b>Ligands</b>                                        | 51.54               | 53.37               | 68.47               | 51.71               | 29.62               | 34.81               | 66.52                      | 69.28                           | 60.50                             | 49.35                               | 61.15                              | 39.11                                 | 65.54                           |
| <b>Water</b>                                          | 46.36               | 46.28               | 51.26               | 37.27               | 30.44               | 36.34               | 51.99                      | 54.59                           | 46.98                             | 45.75                               | 57.62                              | 30.57                                 | 52.94                           |
| <b>Bond length (Å)</b>                                | 0.016               | 0.014               | 0.010               | 0.007               | 0.002               | 0.014               | 0.002                      | 0.004                           | 0.001                             | 0.009                               | 0.006                              | 0.003                                 | 0.004                           |
| <b>Bond angles (°)</b>                                | 1.421               | 1.503               | 1.116               | 0.934               | 0.460               | 1.448               | 0.462                      | 0.657                           | 0.401                             | 1.353                               | 0.995                              | 0.700                                 | 1.087                           |
| <b>Ramachandran favored / allowed / outliers in %</b> | 99.21 / 0.79 / 0.00 | 98.43 / 1.57 / 0.00 | 97.72 / 2.28 / 0.00 | 96.56 / 3.44 / 0.00 | 96.33 / 3.47 / 0.20 | 96.26 / 3.35 / 0.39 | 96.25 / 3.71 / 0.05        | 96.25 / 3.71 / 0.05             | 96.20 / 3.71 / 0.09               | 95.99 / 3.56 / 0.46                 | 96.10 / 3.34 / 0.56                | 97.59 / 2.36 / 0.05                   | 96.54 / 3.28 / 0.18             |
| <b>PDB Code</b>                                       | 8CL5                | 8CL6                | 8CL7                | 8CL8                | 8CL9                | 8CLA                | 8CLC                       | 8CLF                            | 8CLB                              | 8CLG                                | 8CLE                               | 8CLD                                  | 8CLH                            |
