# Supplementary material for: A multi-reservoir extruder for time-resolved serial protein crystallography and compound screening at X-ray free-electron lasers
Source: Research Square preprint supplement (doi:10.21203/rs.3.rs-2621995/v1), 2023-03-09
Supplement: Supplementary file 4 [file 7f293218859d26a1b536a8d4.pdf]

### Crystallographic Table 1: Data processing Statistics

|                                                             | Lysozyme (LCP)              | Lysozyme (LCP) aniso        | Lysozyme (HEC)              | Lysozyme (HEC) aniso        | KR2 (dark)                  | KR2 (dark) Aniso            | KR2 (light)                | KR2 (light) Aniso          | TD1 (apo)                  | TD1 (SBTubA 4)             | T <sub>2</sub> R-TTL (apo)                    | T <sub>2</sub> R-TTL (SolQ2Br) | T <sub>2</sub> R-TTL (Colchicine) | T <sub>2</sub> R-TTL (Epothilone A) | T <sub>2</sub> R-TTL (Vinblastine) | T <sub>2</sub> R-TTL (Ansamitocin P3) | T <sub>2</sub> R-TTL (Cocktail) |
|-------------------------------------------------------------|-----------------------------|-----------------------------|-----------------------------|-----------------------------|-----------------------------|-----------------------------|----------------------------|----------------------------|----------------------------|----------------------------|-----------------------------------------------|--------------------------------|-----------------------------------|-------------------------------------|------------------------------------|---------------------------------------|---------------------------------|
| Space group                                                 | P43212                      |                             |                             |                             | I222                        |                             |                            |                            | P2 <sub>1</sub>            |                            | P2 <sub>1</sub> 2 <sub>1</sub> 2 <sub>1</sub> |                                |                                   |                                     |                                    |                                       |                                 |
| <i>a, b, c</i> (Å)                                          | 77.9, 77.94, 37.64,         |                             | 77.9, 77.9, 97.69           |                             | 41.46, 84.49, 234.95        |                             |                            |                            | 73.47, 91.19, 82.70        |                            | 106.53, 160.48, 181.24                        |                                |                                   |                                     |                                    |                                       |                                 |
| <i>a, b, g</i> (°)                                          | 90, 90, 90                  |                             | 90, 90, 90                  |                             | 90, 90, 90                  |                             |                            |                            | 90, 96.43, 90              |                            | 90, 90, 90                                    |                                |                                   |                                     |                                    |                                       |                                 |
| Indexed patterns                                            | 30993                       |                             | 25690                       |                             | 53745                       |                             | 25036                      |                            | 13466                      | 48475                      | 15862                                         | 22587                          | 11036                             | 10258                               | 1939                               | 2022                                  | 22402                           |
| Indexing rate (%)                                           | 50                          |                             | 50                          |                             | 6.8                         |                             | 11.7                       |                            | 9.1                        | 31.3                       | 21.7                                          | 14.1                           | 10.5                              | 10.8                                | 6.5                                | 5.7                                   | 10.0                            |
| Resolution range for overall and high-resolution statistics | 14.995 – 1.31 (1.36 – 1.31) | 14.995 – 1.31 (1.36 – 1.31) | 14.968 – 1.32 (1.37 – 1.32) | 14.968 – 1.32 (1.37 – 1.32) | 15.976 – 1.98 (2.06 – 1.98) | 15.976 – 1.76 (1.83 – 1.76) | 15.10 – 2.04 (2.11 – 2.04) | 15.10 – 1.76 (1.83 – 1.76) | 14.94 – 2.10 (2.20 – 2.10) | 15.03 – 1.80 (1.90 – 1.80) | 15.22 – 2.40 (2.50 – 2.40)                    | 15.35 – 2.60 (2.70 – 2.60)     | 15.81 – 2.70 (2.80 – 2.70)        | 15.26 – 2.60 (2.70 – 2.60)          | 15.13 – 3.10 (3.20 – 3.10)         | 15.17 – 3.10 (3.20 – 3.10)            | 15.29 – 2.40 (2.50 – 2.40)      |
| No. reflections                                             | 15115 (1466)                | 13352 (167)                 | 14807 (1436)                | 13094 (68)                  | 30862 (3034)                | 28894 (370)                 | 28612 (2818)               | 26536 (172)                | 63162 (6206)               | 100135 (9939)              | 121578 (12016)                                | 95765 (9439)                   | 85408 (8462)                      | 95755 (9439)                        | 56577 (5570)                       | 56426 (5544)                          | 121575 (12016)                  |
| Completeness (%)                                            | 99.85 (98.59)               | 89.39 (11.23)               | 100 (100)                   | 88.43 (4.74)                | 100 (100)                   | 65.7 (8.56)                 | 100 (100)                  | 60.4 (3.98)                | 100 (100)                  | 100 (100)                  | 100 (100)                                     | 100 (100)                      | 100 (100)                         | 100 (100)                           | 100 (100)                          | 100 (100)                             | 100 (100)                       |
| Multiplicity                                                | 423.46 (12.6)               | 471.23 (17.6)               | 739.53 (24.2)               | 832.82 (49.1)               | 939.91 (479.0)              | 960.89 (234.7)              | 390 (224.5)                | 400.15 (115.0)             | 71.9 (43.8)                | 190.5 (133.8)              | 185.5 (98.7)                                  | 381.3 (251.9)                  | 138.4 (90.8)                      | 209.7 (137.4)                       | 42.8 (31.9)                        | 38.5 (28.7)                           | 350.9 (177.6)                   |
| R <sub>split</sub> (%)                                      | 11.93 (155.46)              | 11.74 (104.39)              | 11.16 (163.54)              | 10.86 (113.61)              | 9.36 (98.87)                | 9.16 (78.52)                | 13.59 (100.07)             | 13.30 (93.33)              | 25.2 (195.5)               | 18.2 (176.9)               | 20.6 (194.2)                                  | 15.2 (183.1)                   | 22.6 (168.9)                      | 21.8 (119.3)                        | 39.6 (129.8)                       | 36.6 (94.3)                           | 14.1 (139.6)                    |
| CC <sub>1/2</sub>                                           | 0.975 (0.204)               | 0.947 (0.304)               | 0.996 (0.196)               | 0.982 (0.473)               | 0.986 (0.689)               | 0.986 (0.483)               | 0.967 (0.632)              | 0.966 (0.315)              | 0.931 (0.323)              | 0.966 (0.401)              | 0.951 (0.190)                                 | 0.976 (0.257)                  | 0.944 (0.207)                     | 0.983 (0.370)                       | 0.771 (0.26)                       | 0.776 (0.420)                         | 0.980 (0.321)                   |
| <I/σ(I)>                                                    | 7.31 (0.17)                 | 8.14 (0.99)                 | 7.29 (0.68)                 | 8.16 (0.89)                 | 7.57 (1.10)                 | 8.17 (1.46)                 | 5.69 (1.08)                | 6.18 (1.23)                | 3.58 (0.52)                | 4.64 (0.51)                | 3.88 (0.41)                                   | 6.13 (0.59)                    | 4.56 (0.64)                       | 4.72 (0.89)                         | 3.07 (0.90)                        | 3.38 (1.25)                           | 6.15 (0.77)                     |
| PDB Code                                                    | 8CL5                        |                             | 8CL6                        |                             | 8CL7                        |                             | 8CL8                       |                            | 8CL9                       | 8CLA                       | 8CLC                                          | 8CLF                           | 8CLB                              | 8CLG                                | 8CLE                               | 8CLD                                  | 8CLH                            |
