# Supplementary material for: A multi-reservoir extruder for time-resolved serial protein crystallography and compound screening at X-ray free-electron lasers
Source: Research Square preprint supplement (doi:10.21203/rs.3.rs-2621995/v1), 2023-03-09
Supplement: Supplementary file 5 [file 9c2763e88c0a10c00c285603.pdf]

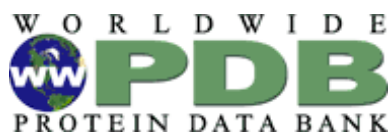

# Preliminary Full wwPDB X-ray Structure Validation Report ⓘ

Feb 8, 2023 – 10:29 am GMT

Deposition ID : D\_1292128536

**This wwPDB validation report is NOT for manuscript review**

This is a Preliminary Full wwPDB X-ray Structure Validation Report.

This report is produced by the wwPDB Deposition System during initial deposition but before annotation of the structure.

We welcome your comments at [validation@mail.wwpdb.org](mailto:validation@mail.wwpdb.org)

A user guide is available at

<https://www.wwpdb.org/validation/2017/XrayValidationReportHelp>

with specific help available everywhere you see the ⓘ symbol.

The types of validation reports are described at

<http://www.wwpdb.org/validation/2017/FAQs#types>.

---

The following versions of software and data (see [references ⓘ](#)) were used in the production of this report:

|                                |   |                                                                    |
|--------------------------------|---|--------------------------------------------------------------------|
| MolProbity                     | : | 4.02b-467                                                          |
| Mogul                          | : | 1.8.4, CSD as541be (2020)                                          |
| Xtriage (Phenix)               | : | 1.13                                                               |
| EDS                            | : | 2.32.1                                                             |
| buster-report                  | : | 1.1.7 (2018)                                                       |
| Percentile statistics          | : | 20191225.v01 (using entries in the PDB archive December 25th 2019) |
| Refmac                         | : | 5.8.0158                                                           |
| CCP4                           | : | 7.0.044 (Gargrove)                                                 |
| Ideal geometry (proteins)      | : | Engh & Huber (2001)                                                |
| Ideal geometry (DNA, RNA)      | : | Parkinson et al. (1996)                                            |
| Validation Pipeline (wwPDB-VP) | : | 2.32.1                                                             |

# 1 Overall quality at a glance i

The following experimental techniques were used to determine the structure:

*X-RAY DIFFRACTION*

The reported resolution of this entry is 2.50 Å.

Percentile scores (ranging between 0-100) for global validation metrics of the entry are shown in the following graphic. The table shows the number of entries on which the scores are based.

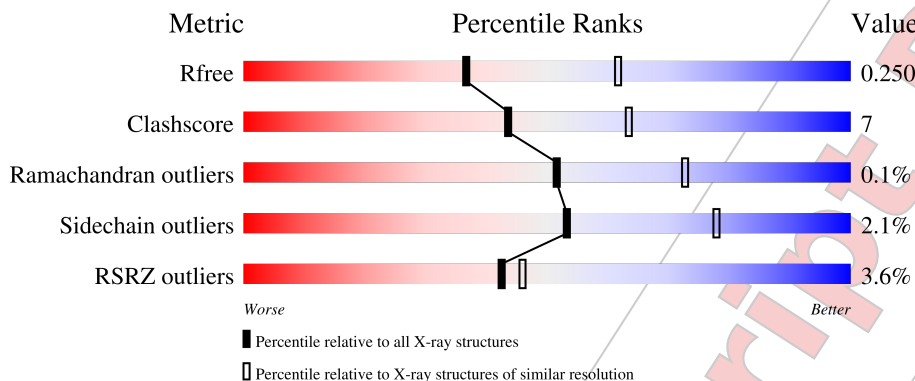

| Metric                | Whole archive<br>(#Entries) | Similar resolution<br>(#Entries, resolution range(Å)) |
|-----------------------|-----------------------------|-------------------------------------------------------|
| $R_{free}$            | 130704                      | 4661 (2.50-2.50)                                      |
| Clashscore            | 141614                      | 5346 (2.50-2.50)                                      |
| Ramachandran outliers | 138981                      | 5231 (2.50-2.50)                                      |
| Sidechain outliers    | 138945                      | 5233 (2.50-2.50)                                      |
| RSRZ outliers         | 127900                      | 4559 (2.50-2.50)                                      |

The table below summarises the geometric issues observed across the polymeric chains and their fit to the electron density. The red, orange, yellow and green segments of the lower bar indicate the fraction of residues that contain outliers for  $\geq 3$ , 2, 1 and 0 types of geometric quality criteria respectively. A grey segment represents the fraction of residues that are not modelled. The numeric value for each fraction is indicated below the corresponding segment, with a dot representing fractions  $\leq 5\%$ . The upper red bar (where present) indicates the fraction of residues that have poor fit to the electron density. The numeric value is given above the bar.

| Mol | Chain | Length | Quality of chain                                                                                                                                                                                                                                                                                                                                                                                                                                   |
|-----|-------|--------|----------------------------------------------------------------------------------------------------------------------------------------------------------------------------------------------------------------------------------------------------------------------------------------------------------------------------------------------------------------------------------------------------------------------------------------------------|
| 1   | A     | 431    | <div style="display: flex; align-items: center;"> <div style="width: 3%; height: 10px; background-color: red; margin-right: 5px;"></div> <div style="width: 82%; height: 10px; background-color: green; margin-right: 5px;"></div> <div style="width: 17%; height: 10px; background-color: yellow; margin-right: 5px;"></div> <div style="width: 100%; height: 10px; background-color: grey; margin-right: 5px;"></div> </div> <p>3% 82% 17% .</p> |
| 2   | B     | 431    | <div style="display: flex; align-items: center;"> <div style="width: 6%; height: 10px; background-color: red; margin-right: 5px;"></div> <div style="width: 82%; height: 10px; background-color: green; margin-right: 5px;"></div> <div style="width: 17%; height: 10px; background-color: yellow; margin-right: 5px;"></div> <div style="width: 100%; height: 10px; background-color: grey; margin-right: 5px;"></div> </div> <p>6% 82% 17% .</p> |
| 3   | F     | 155    | <div style="display: flex; align-items: center;"> <div style="width: 0%; height: 10px; background-color: red; margin-right: 5px;"></div> <div style="width: 85%; height: 10px; background-color: green; margin-right: 5px;"></div> <div style="width: 15%; height: 10px; background-color: yellow; margin-right: 5px;"></div> <div style="width: 100%; height: 10px; background-color: grey; margin-right: 5px;"></div> </div> <p>% 85% 15%</p>    |

## 2 Entry composition [i](#)

There are 6 unique types of molecules in this entry. The entry contains 8117 atoms, of which 0 are hydrogens and 0 are deuteriums.

In the tables below, the ZeroOcc column contains the number of atoms modelled with zero occupancy, the AltConf column contains the number of residues with at least one atom in alternate conformation and the Trace column contains the number of residues modelled with at most 2 atoms.

- Molecule 1 is a protein.

| Mol | Chain | Residues | Atoms |      |     |     |    | ZeroOcc | AltConf | Trace |
|-----|-------|----------|-------|------|-----|-----|----|---------|---------|-------|
|     |       |          | Total | C    | N   | O   | S  |         |         |       |
| 1   | A     | 431      | 3396  | 2155 | 578 | 638 | 25 | 2       | 7       | 0     |

- Molecule 2 is a protein.

| Mol | Chain | Residues | Atoms |      |     |     |    | ZeroOcc | AltConf | Trace |
|-----|-------|----------|-------|------|-----|-----|----|---------|---------|-------|
|     |       |          | Total | C    | N   | O   | S  |         |         |       |
| 2   | B     | 431      | 3363  | 2112 | 570 | 654 | 27 | 0       | 2       | 0     |

- Molecule 3 is a protein.

| Mol | Chain | Residues | Atoms |     |     |     |   | ZeroOcc | AltConf | Trace |
|-----|-------|----------|-------|-----|-----|-----|---|---------|---------|-------|
|     |       |          | Total | C   | N   | O   | S |         |         |       |
| 3   | F     | 155      | 1148  | 724 | 195 | 226 | 3 | 0       | 0       | 0     |

- Molecule 4 is GUANOSINE-5'-TRIPHOSPHATE (three-letter code: GTP) (formula:  $C_{10}H_{16}N_5O_{14}P_3$ ).

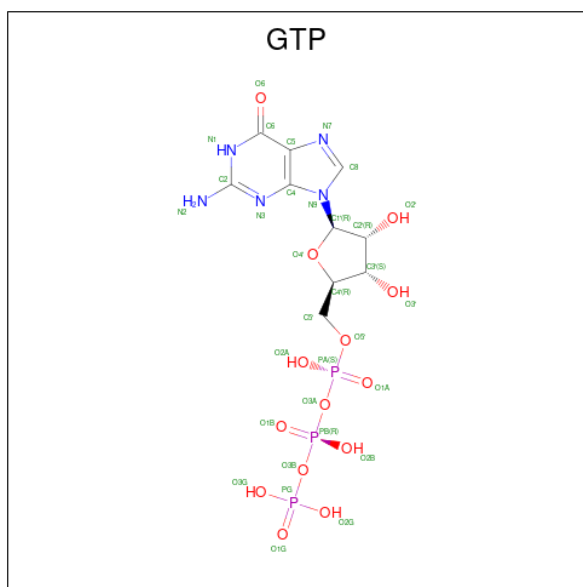

| Mol | Chain | Residues | Atoms |    |   |    | ZeroOcc | AltConf |   |
|-----|-------|----------|-------|----|---|----|---------|---------|---|
| 4   | X     | 1        | Total | C  | N | O  | P       | 0       | 0 |
|     |       |          | 32    | 10 | 5 | 14 | 3       |         |   |
| 4   | X     | 1        | Total | C  | N | O  | P       | 0       | 0 |
|     |       |          | 32    | 10 | 5 | 14 | 3       |         |   |

- Molecule 5 is MAGNESIUM ION (three-letter code: MG) (formula: Mg).

| Mol | Chain | Residues | Atoms |    | ZeroOcc | AltConf |
|-----|-------|----------|-------|----|---------|---------|
| 5   | X     | 1        | Total | Mg | 0       | 0       |
|     |       |          | 1     | 1  |         |         |

- Molecule 6 is water.

| Mol | Chain | Residues | Atoms |     | ZeroOcc | AltConf |
|-----|-------|----------|-------|-----|---------|---------|
| 6   | S     | 145      | Total | O   | 0       | 0       |
|     |       |          | 145   | 145 |         |         |

### 3 Residue-property plots i

These plots are drawn for all protein, RNA, DNA and oligosaccharide chains in the entry. The first graphic for a chain summarises the proportions of the various outlier classes displayed in the second graphic. The second graphic shows the sequence view annotated by issues in geometry and electron density. Residues are color-coded according to the number of geometric quality criteria for which they contain at least one outlier: green = 0, yellow = 1, orange = 2 and red = 3 or more. A red dot above a residue indicates a poor fit to the electron density ( $RSRZ > 2$ ). Stretches of 2 or more consecutive residues without any outlier are shown as a green connector. Residues present in the sample, but not in the model, are shown in grey.

• Molecule 1:

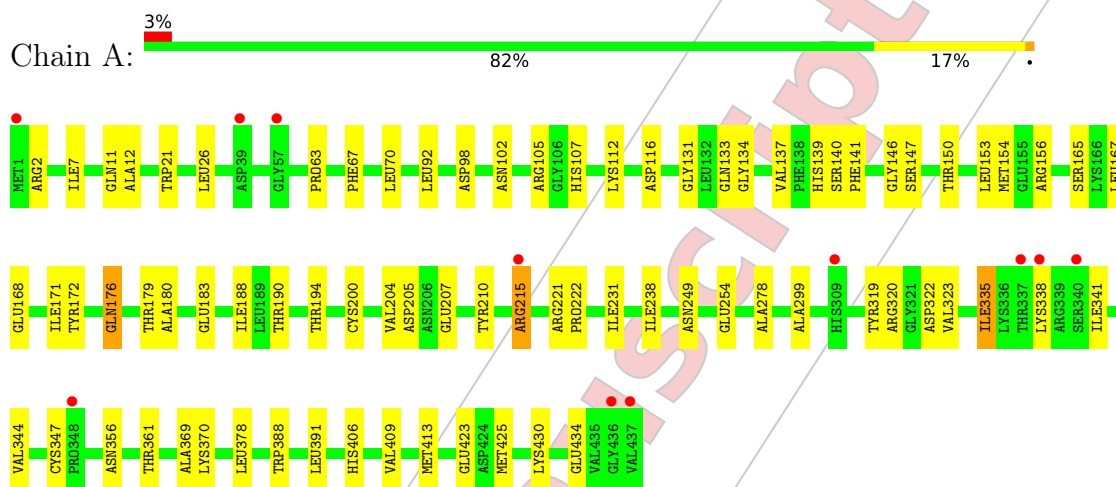

• Molecule 2:

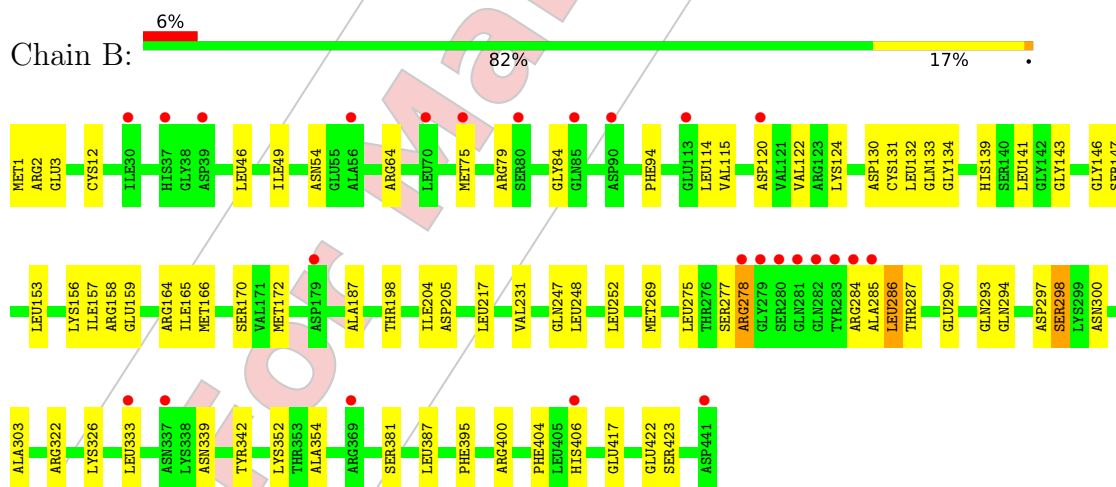

• Molecule 3:

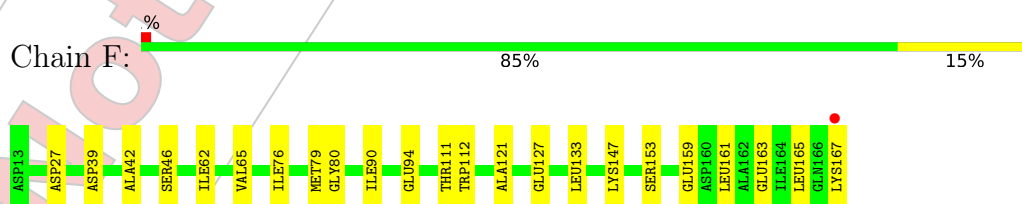

## 4 Data and refinement statistics i

| Property                                                                | Value                                                       | Source           |
|-------------------------------------------------------------------------|-------------------------------------------------------------|------------------|
| Space group                                                             | P 1 21 1                                                    | Depositor        |
| Cell constants<br>a, b, c, $\alpha$ , $\beta$ , $\gamma$                | 73.47Å 91.19Å 82.70Å<br>90.00° 96.43° 90.00°                | Depositor        |
| Resolution (Å)                                                          | 13.00 – 2.50<br>15.01 – 1.91                                | Depositor<br>EDS |
| % Data completeness<br>(in resolution range)                            | 92.3 (13.00-2.50)<br>49.8 (15.01-1.91)                      | Depositor<br>EDS |
| $R_{merge}$                                                             | (Not available)                                             | Depositor        |
| $R_{sym}$                                                               | (Not available)                                             | Depositor        |
| $\langle I/\sigma(I) \rangle$ <sup>1</sup>                              | 0.89 (at 1.91Å)                                             | Xtrriage         |
| Refinement program                                                      | .                                                           | Depositor        |
| R, $R_{free}$                                                           | 0.185 , 0.241<br>0.200 , 0.250                              | Depositor<br>DCC |
| $R_{free}$ test set                                                     | 2000 reflections (4.78%)                                    | wwPDB-VP         |
| Wilson B-factor (Å <sup>2</sup> )                                       | 29.2                                                        | Xtrriage         |
| Anisotropy                                                              | 0.049                                                       | Xtrriage         |
| Bulk solvent $k_{sol}$ (e/Å <sup>3</sup> ), $B_{sol}$ (Å <sup>2</sup> ) | 0.36 , 42.7                                                 | EDS              |
| L-test for twinning <sup>2</sup>                                        | $\langle  L  \rangle = 0.50$ , $\langle L^2 \rangle = 0.33$ | Xtrriage         |
| Estimated twinning fraction                                             | No twinning to report.                                      | Xtrriage         |
| $F_o, F_c$ correlation                                                  | 0.93                                                        | EDS              |
| Total number of atoms                                                   | 8117                                                        | wwPDB-VP         |
| Average B, all atoms (Å <sup>2</sup> )                                  | 37.0                                                        | wwPDB-VP         |

Xtrriage's analysis on translational NCS is as follows: *The largest off-origin peak in the Patterson function is 4.17% of the height of the origin peak. No significant pseudotranslation is detected.*

<sup>1</sup>Intensities estimated from amplitudes.

<sup>2</sup>Theoretical values of  $\langle |L| \rangle$ ,  $\langle L^2 \rangle$  for acentric reflections are 0.5, 0.333 respectively for untwinned datasets, and 0.375, 0.2 for perfectly twinned datasets.

## 5 Model quality [i](#)

### 5.1 Standard geometry [i](#)

Bond lengths and bond angles in the following residue types are not validated in this section: GTP, MG

The Z score for a bond length (or angle) is the number of standard deviations the observed value is removed from the expected value. A bond length (or angle) with  $|Z| > 5$  is considered an outlier worth inspection. RMSZ is the root-mean-square of all Z scores of the bond lengths (or angles).

| Mol | Chain | Bond lengths |         | Bond angles |                |
|-----|-------|--------------|---------|-------------|----------------|
|     |       | RMSZ         | # Z  >5 | RMSZ        | # Z  >5        |
| 1   | A     | 0.27         | 0/3491  | 0.48        | 0/4740         |
| 2   | B     | 0.27         | 0/3440  | 0.48        | 1/4663 (0.0%)  |
| 3   | F     | 0.24         | 0/1164  | 0.41        | 0/1583         |
| All | All   | 0.27         | 0/8095  | 0.47        | 1/10986 (0.0%) |

Chiral center outliers are detected by calculating the chiral volume of a chiral center and verifying if the center is modelled as a planar moiety or with the opposite hand. A planarity outlier is detected by checking planarity of atoms in a peptide group, atoms in a mainchain group or atoms of a sidechain that are expected to be planar.

| Mol | Chain | #Chirality outliers | #Planarity outliers |
|-----|-------|---------------------|---------------------|
| 2   | B     | 0                   | 1                   |

There are no bond length outliers.

All (1) bond angle outliers are listed below:

| Mol | Chain | Res | Type | Atoms    | Z    | Observed(°) | Ideal(°) |
|-----|-------|-----|------|----------|------|-------------|----------|
| 2   | B     | 114 | LEU  | CA-CB-CG | 5.70 | 128.40      | 115.30   |

There are no chirality outliers.

All (1) planarity outliers are listed below:

| Mol | Chain | Res | Type | Group     |
|-----|-------|-----|------|-----------|
| 2   | B     | 158 | ARG  | Sidechain |

### 5.2 Too-close contacts [i](#)

In the following table, the Non-H and H(model) columns list the number of non-hydrogen atoms and hydrogen atoms in the chain respectively. The H(added) column lists the number of hydrogen

atoms added and optimized by MolProbity. The Clashes column lists the number of clashes within the asymmetric unit, whereas Symm-Clashes lists symmetry-related clashes.

| Mol | Chain | Non-H | H(model) | H(added) | Clashes | Symm-Clashes |
|-----|-------|-------|----------|----------|---------|--------------|
| 1   | A     | 3396  | 0        | 3309     | 44      | 0            |
| 2   | B     | 3363  | 0        | 3213     | 53      | 0            |
| 3   | F     | 1148  | 0        | 1145     | 13      | 0            |
| 4   | X     | 64    | 0        | 24       | 1       | 0            |
| 5   | X     | 1     | 0        | 0        | 0       | 0            |
| 6   | S     | 145   | 0        | 0        | 1       | 0            |
| All | All   | 8117  | 0        | 7691     | 105     | 0            |

The all-atom clashscore is defined as the number of clashes found per 1000 atoms (including hydrogen atoms). The all-atom clashscore for this structure is 7.

All (105) close contacts within the same asymmetric unit are listed below, sorted by their clash magnitude.

| Atom-1           | Atom-2           | Interatomic distance (Å) | Clash overlap (Å) |
|------------------|------------------|--------------------------|-------------------|
| 1:A:107:HIS:O    | 1:A:112:LYS:NZ   | 2.07                     | 0.88              |
| 3:F:27:ASP:OD1   | 3:F:62:ILE:HG13  | 1.76                     | 0.85              |
| 1:A:176:GLN:HE22 | 1:A:207:GLU:HG3  | 1.42                     | 0.82              |
| 2:B:339:ASN:HB3  | 2:B:342:TYR:HD2  | 1.54                     | 0.72              |
| 2:B:46:LEU:HA    | 2:B:49:ILE:HB    | 1.73                     | 0.70              |
| 2:B:1:MET:CE     | 2:B:133:GLN:CB   | 2.74                     | 0.64              |
| 1:A:172:TYR:HB3  | 1:A:205:ASP:HA   | 1.80                     | 0.62              |
| 2:B:120:ASP:O    | 2:B:124:LYS:HG2  | 2.01                     | 0.60              |
| 1:A:335:ILE:HG23 | 1:A:341:ILE:HD12 | 1.84                     | 0.60              |
| 3:F:39:ASP:HB3   | 3:F:42:ALA:HB2   | 1.84                     | 0.59              |
| 2:B:1:MET:CE     | 2:B:133:GLN:HB2  | 2.33                     | 0.59              |
| 2:B:1:MET:HE1    | 2:B:133:GLN:HB2  | 1.84                     | 0.59              |
| 2:B:79:ARG:HA    | 2:B:84:GLY:HA3   | 1.85                     | 0.58              |
| 2:B:172:MET:HG3  | 2:B:387:LEU:HD21 | 1.85                     | 0.58              |
| 2:B:406:HIS:CD2  | 2:B:406:HIS:H    | 2.21                     | 0.57              |
| 1:A:188:ILE:HG23 | 1:A:425:MET:HG3  | 1.87                     | 0.56              |
| 2:B:248:LEU:HD23 | 2:B:354:ALA:HB2  | 1.86                     | 0.56              |
| 2:B:275:LEU:HD11 | 2:B:300:ASN:HA   | 1.88                     | 0.55              |
| 1:A:167:LEU:HG   | 1:A:200:CYS:HB3  | 1.88                     | 0.55              |
| 2:B:1:MET:CE     | 2:B:133:GLN:HB3  | 2.36                     | 0.54              |
| 2:B:1:MET:HE1    | 2:B:133:GLN:CB   | 2.37                     | 0.54              |
| 2:B:122:VAL:HG21 | 2:B:157:ILE:HD11 | 1.89                     | 0.54              |
| 2:B:1:MET:HE3    | 2:B:133:GLN:HB3  | 1.90                     | 0.54              |
| 2:B:1:MET:HE3    | 2:B:133:GLN:CB   | 2.39                     | 0.53              |
| 1:A:11:GLN:OE1   | 2:B:247:GLN:NE2  | 2.41                     | 0.53              |

Continued on next page...

*Continued from previous page...*

| Atom-1           | Atom-2           | Interatomic distance (Å) | Clash overlap (Å) |
|------------------|------------------|--------------------------|-------------------|
| 2:B:165:ILE:HG21 | 2:B:252:LEU:HB3  | 1.90                     | 0.53              |
| 3:F:133:LEU:HD11 | 3:F:165:LEU:HD23 | 1.90                     | 0.53              |
| 1:A:2:ARG:HD3    | 1:A:133:GLN:HG2  | 1.90                     | 0.53              |
| 2:B:54:ASN:OD1   | 2:B:64:ARG:NE    | 2.41                     | 0.52              |
| 3:F:94:GLU:H     | 3:F:94:GLU:CD    | 2.14                     | 0.51              |
| 2:B:143:GLY:O    | 2:B:147:SER:OG   | 2.25                     | 0.51              |
| 1:A:406:HIS:HA   | 1:A:409:VAL:HG22 | 1.93                     | 0.51              |
| 1:A:140:SER:HA   | 1:A:171:ILE:HB   | 1.93                     | 0.51              |
| 2:B:287:THR:OG1  | 2:B:290:GLU:HG3  | 2.12                     | 0.50              |
| 1:A:26:LEU:HB3   | 1:A:361:THR:HG21 | 1.93                     | 0.50              |
| 1:A:70:LEU:HB2   | 1:A:98:ASP:HA    | 1.94                     | 0.49              |
| 1:A:238:ILE:HG12 | 1:A:378:LEU:HD21 | 1.93                     | 0.49              |
| 2:B:12:CYS:HB2   | 4:X:503:GTP:C8   | 2.47                     | 0.49              |
| 2:B:278:ARG:NH2  | 6:S:117:HOH:O    | 2.45                     | 0.49              |
| 2:B:134:GLY:HA2  | 2:B:164:ARG:HB3  | 1.95                     | 0.49              |
| 1:A:116:ASP:OD1  | 1:A:156:ARG:NH2  | 2.45                     | 0.49              |
| 1:A:179:THR:HG21 | 2:B:247:GLN:HG2  | 1.95                     | 0.49              |
| 2:B:156:LYS:O    | 2:B:159:GLU:HG2  | 2.13                     | 0.49              |
| 1:A:319:TYR:HB3  | 1:A:323:VAL:HG21 | 1.94                     | 0.49              |
| 2:B:287:THR:HG23 | 2:B:290:GLU:OE1  | 2.13                     | 0.49              |
| 2:B:204:ILE:HD13 | 2:B:231:VAL:HG13 | 1.95                     | 0.48              |
| 1:A:430:LYS:O    | 1:A:434:GLU:HG3  | 2.14                     | 0.48              |
| 2:B:3:GLU:OE1    | 2:B:130:ASP:N    | 2.47                     | 0.48              |
| 2:B:400:ARG:HD2  | 3:F:112:TRP:CE2  | 2.48                     | 0.48              |
| 2:B:286:LEU:HD11 | 2:B:294:GLN:NE2  | 2.29                     | 0.48              |
| 2:B:205:ASP:HB3  | 2:B:303:ALA:HA   | 1.96                     | 0.47              |
| 1:A:215:ARG:HH12 | 1:A:299:ALA:HB1  | 1.80                     | 0.47              |
| 1:A:388:TRP:CE3  | 1:A:425:MET:HE1  | 2.49                     | 0.47              |
| 1:A:278:ALA:HA   | 1:A:369:ALA:HB2  | 1.96                     | 0.47              |
| 1:A:139:HIS:NE2  | 1:A:168:GLU:OE2  | 2.43                     | 0.47              |
| 2:B:141:LEU:HB3  | 2:B:187:ALA:HA   | 1.97                     | 0.47              |
| 2:B:2:ARG:O      | 2:B:133:GLN:NE2  | 2.38                     | 0.46              |
| 1:A:102:ASN:HB3  | 1:A:105:ARG:HB2  | 1.98                     | 0.46              |
| 1:A:335:ILE:HD12 | 1:A:335:ILE:HA   | 1.77                     | 0.46              |
| 2:B:395:PHE:CE1  | 2:B:422:GLU:HB2  | 2.52                     | 0.45              |
| 3:F:79:MET:HE2   | 3:F:111:THR:HG21 | 1.99                     | 0.45              |
| 1:A:249:ASN:HA   | 1:A:254:GLU:HB3  | 1.98                     | 0.45              |
| 2:B:166:MET:HB3  | 2:B:198:THR:HA   | 1.98                     | 0.45              |
| 1:A:139:HIS:ND1  | 1:A:146:GLY:O    | 2.50                     | 0.45              |
| 1:A:210:TYR:CZ   | 1:A:222:PRO:HD2  | 2.52                     | 0.45              |
| 1:A:147:SER:HB2  | 1:A:190:THR:HB   | 1.99                     | 0.44              |

*Continued on next page...*

Continued from previous page...

| Atom-1           | Atom-2           | Interatomic distance (Å) | Clash overlap (Å) |
|------------------|------------------|--------------------------|-------------------|
| 2:B:297:ASP:OD1  | 2:B:298:SER:N    | 2.50                     | 0.44              |
| 1:A:2:ARG:HA     | 1:A:131:GLY:O    | 2.17                     | 0.44              |
| 2:B:286:LEU:HD22 | 2:B:286:LEU:HA   | 1.77                     | 0.44              |
| 1:A:137:VAL:HG21 | 1:A:154:MET:SD   | 2.57                     | 0.44              |
| 1:A:12:ALA:HB3   | 1:A:140:SER:HB3  | 1.99                     | 0.44              |
| 1:A:154:MET:HG3  | 1:A:194:THR:HG23 | 2.00                     | 0.44              |
| 2:B:284:ARG:O    | 2:B:285:ALA:C    | 2.56                     | 0.44              |
| 1:A:409:VAL:HA   | 1:A:413:MET:O    | 2.18                     | 0.44              |
| 2:B:139:HIS:CE1  | 2:B:170:SER:OG   | 2.71                     | 0.44              |
| 1:A:150:THR:O    | 1:A:154:MET:HG2  | 2.18                     | 0.43              |
| 1:A:21:TRP:CZ3   | 1:A:63:PRO:HB3   | 2.52                     | 0.43              |
| 1:A:67:PHE:HB2   | 1:A:92:LEU:HD23  | 2.00                     | 0.43              |
| 3:F:159:GLU:O    | 3:F:163:GLU:HG3  | 2.17                     | 0.43              |
| 1:A:204:VAL:HG11 | 1:A:231:ILE:HG12 | 2.00                     | 0.43              |
| 2:B:352:LYS:HD3  | 2:B:352:LYS:HA   | 1.87                     | 0.43              |
| 2:B:322:ARG:HH11 | 2:B:322:ARG:HG2  | 1.83                     | 0.43              |
| 3:F:76:ILE:HB    | 3:F:80:GLY:HA2   | 2.00                     | 0.43              |
| 2:B:404:PHE:CE2  | 3:F:90:ILE:HD12  | 2.55                     | 0.42              |
| 1:A:344:VAL:HG23 | 1:A:347:CYS:HB2  | 2.01                     | 0.42              |
| 1:A:7:ILE:HG21   | 1:A:153:LEU:HD21 | 2.02                     | 0.42              |
| 2:B:3:GLU:HB3    | 2:B:64:ARG:CZ    | 2.50                     | 0.42              |
| 2:B:217:LEU:HD13 | 2:B:277:SER:HB3  | 2.01                     | 0.42              |
| 3:F:121:ALA:HB1  | 3:F:161:LEU:HD21 | 2.02                     | 0.42              |
| 2:B:115:VAL:HG23 | 2:B:153:LEU:HG   | 2.00                     | 0.42              |
| 2:B:269:MET:HE3  | 2:B:381:SER:HB3  | 2.01                     | 0.42              |
| 1:A:320:ARG:HA   | 1:A:356:ASN:O    | 2.20                     | 0.41              |
| 1:A:434:GLU:HG3  | 1:A:434:GLU:H    | 1.68                     | 0.41              |
| 3:F:62:ILE:HA    | 3:F:65:VAL:HG12  | 2.02                     | 0.41              |
| 2:B:132:LEU:O    | 2:B:164:ARG:NH1  | 2.52                     | 0.41              |
| 1:A:338:LYS:HB3  | 1:A:338:LYS:HE2  | 1.88                     | 0.41              |
| 2:B:333:LEU:HD12 | 2:B:333:LEU:HA   | 1.84                     | 0.41              |
| 1:A:391:LEU:HD23 | 1:A:391:LEU:HA   | 1.94                     | 0.41              |
| 2:B:75:MET:HG3   | 2:B:94:PHE:CG    | 2.55                     | 0.41              |
| 2:B:139:HIS:HD2  | 2:B:146:GLY:O    | 2.04                     | 0.41              |
| 2:B:1:MET:N      | 2:B:131:CYS:SG   | 2.80                     | 0.40              |
| 1:A:134:GLY:HA3  | 1:A:165:SER:O    | 2.22                     | 0.40              |
| 2:B:400:ARG:HD2  | 3:F:112:TRP:NE1  | 2.36                     | 0.40              |
| 3:F:127:GLU:H    | 3:F:127:GLU:HG2  | 1.63                     | 0.40              |
| 1:A:180:ALA:O    | 1:A:183:GLU:HG3  | 2.21                     | 0.40              |

There are no symmetry-related clashes.

## 5.3 Torsion angles [i](#)

### 5.3.1 Protein backbone [i](#)

In the following table, the Percentiles column shows the percent Ramachandran outliers of the chain as a percentile score with respect to all X-ray entries followed by that with respect to entries of similar resolution.

The Analysed column shows the number of residues for which the backbone conformation was analysed, and the total number of residues.

| Mol | Chain | Analysed         | Favoured  | Allowed | Outliers | Percentiles |     |
|-----|-------|------------------|-----------|---------|----------|-------------|-----|
| 1   | A     | 434/431 (101%)   | 419 (96%) | 14 (3%) | 1 (0%)   | 47          | 68  |
| 2   | B     | 431/431 (100%)   | 414 (96%) | 17 (4%) | 0        | 100         | 100 |
| 3   | F     | 153/155 (99%)    | 148 (97%) | 5 (3%)  | 0        | 100         | 100 |
| All | All   | 1018/1017 (100%) | 981 (96%) | 36 (4%) | 1 (0%)   | 51          | 73  |

All (1) Ramachandran outliers are listed below:

| Mol | Chain | Res | Type |
|-----|-------|-----|------|
| 1   | A     | 322 | ASP  |

### 5.3.2 Protein sidechains [i](#)

In the following table, the Percentiles column shows the percent sidechain outliers of the chain as a percentile score with respect to all X-ray entries followed by that with respect to entries of similar resolution.

The Analysed column shows the number of residues for which the sidechain conformation was analysed, and the total number of residues.

| Mol | Chain | Analysed       | Rotameric | Outliers | Percentiles |    |
|-----|-------|----------------|-----------|----------|-------------|----|
| 1   | A     | 365/365 (100%) | 358 (98%) | 7 (2%)   | 57          | 80 |
| 2   | B     | 365/372 (98%)  | 358 (98%) | 7 (2%)   | 57          | 80 |
| 3   | F     | 119/120 (99%)  | 115 (97%) | 4 (3%)   | 37          | 63 |
| All | All   | 849/857 (99%)  | 831 (98%) | 18 (2%)  | 53          | 78 |

All (18) residues with a non-rotameric sidechain are listed below:

| Mol | Chain | Res | Type |
|-----|-------|-----|------|
| 1   | A     | 141 | PHE  |
| 1   | A     | 176 | GLN  |

*Continued on next page...*

Continued from previous page...

| Mol | Chain | Res | Type |
|-----|-------|-----|------|
| 1   | A     | 215 | ARG  |
| 1   | A     | 221 | ARG  |
| 1   | A     | 335 | ILE  |
| 1   | A     | 370 | LYS  |
| 1   | A     | 423 | GLU  |
| 2   | B     | 278 | ARG  |
| 2   | B     | 286 | LEU  |
| 2   | B     | 293 | GLN  |
| 2   | B     | 298 | SER  |
| 2   | B     | 326 | LYS  |
| 2   | B     | 417 | GLU  |
| 2   | B     | 423 | SER  |
| 3   | F     | 46  | SER  |
| 3   | F     | 147 | LYS  |
| 3   | F     | 153 | SER  |
| 3   | F     | 167 | LYS  |

Sometimes sidechains can be flipped to improve hydrogen bonding and reduce clashes. All (7) such sidechains are listed below:

| Mol | Chain | Res | Type |
|-----|-------|-----|------|
| 1   | A     | 85  | GLN  |
| 1   | A     | 91  | GLN  |
| 1   | A     | 176 | GLN  |
| 1   | A     | 256 | GLN  |
| 1   | A     | 301 | GLN  |
| 2   | B     | 139 | HIS  |
| 2   | B     | 197 | ASN  |

### 5.3.3 RNA [i](#)

There are no RNA molecules in this entry.

### 5.4 Non-standard residues in protein, DNA, RNA chains [i](#)

There are no non-standard protein/DNA/RNA residues in this entry.

### 5.5 Carbohydrates [i](#)

There are no monosaccharides in this entry.

## 5.6 Ligand geometry [i](#)

Of 3 ligands modelled in this entry, 1 is monoatomic - leaving 2 for Mogul analysis.

In the following table, the Counts columns list the number of bonds (or angles) for which Mogul statistics could be retrieved, the number of bonds (or angles) that are observed in the model and the number of bonds (or angles) that are defined in the Chemical Component Dictionary. The Link column lists molecule types, if any, to which the group is linked. The Z score for a bond length (or angle) is the number of standard deviations the observed value is removed from the expected value. A bond length (or angle) with  $|Z| > 2$  is considered an outlier worth inspection. RMSZ is the root-mean-square of all Z scores of the bond lengths (or angles).

| Mol | Type | Chain | Res | Link | Bond lengths |      |          | Bond angles |      |          |
|-----|------|-------|-----|------|--------------|------|----------|-------------|------|----------|
|     |      |       |     |      | Counts       | RMSZ | # Z  > 2 | Counts      | RMSZ | # Z  > 2 |
| 4   | GTP  | X     | 503 | -    | 26,34,34     | 1.02 | 3 (11%)  | 32,54,54    | 0.69 | 1 (3%)   |
| 4   | GTP  | X     | 501 | 5    | 26,34,34     | 1.09 | 3 (11%)  | 32,54,54    | 0.72 | 1 (3%)   |

In the following table, the Chirals column lists the number of chiral outliers, the number of chiral centers analysed, the number of these observed in the model and the number defined in the Chemical Component Dictionary. Similar counts are reported in the Torsion and Rings columns. '-' means no outliers of that kind were identified.

| Mol | Type | Chain | Res | Link | Chirals | Torsions   | Rings   |
|-----|------|-------|-----|------|---------|------------|---------|
| 4   | GTP  | X     | 503 | -    | -       | 5/18/38/38 | 0/3/3/3 |
| 4   | GTP  | X     | 501 | 5    | -       | 5/18/38/38 | 0/3/3/3 |

All (6) bond length outliers are listed below:

| Mol | Chain | Res | Type | Atoms | Z     | Observed(Å) | Ideal(Å) |
|-----|-------|-----|------|-------|-------|-------------|----------|
| 4   | X     | 501 | GTP  | C5-C6 | -2.79 | 1.41        | 1.47     |
| 4   | X     | 503 | GTP  | C5-C6 | -2.69 | 1.41        | 1.47     |
| 4   | X     | 503 | GTP  | C8-N7 | -2.21 | 1.31        | 1.35     |
| 4   | X     | 501 | GTP  | C8-N7 | -2.17 | 1.31        | 1.35     |
| 4   | X     | 501 | GTP  | C5-C4 | -2.03 | 1.37        | 1.43     |
| 4   | X     | 503 | GTP  | C5-C4 | -2.01 | 1.38        | 1.43     |

All (2) bond angle outliers are listed below:

| Mol | Chain | Res | Type | Atoms    | Z    | Observed(°) | Ideal(°) |
|-----|-------|-----|------|----------|------|-------------|----------|
| 4   | X     | 501 | GTP  | O6-C6-C5 | 2.04 | 128.35      | 124.37   |
| 4   | X     | 503 | GTP  | O6-C6-C5 | 2.02 | 128.33      | 124.37   |

There are no chirality outliers.

All (10) torsion outliers are listed below:

| Mol | Chain | Res | Type | Atoms          |
|-----|-------|-----|------|----------------|
| 4   | X     | 501 | GTP  | C5'-O5'-PA-O1A |
| 4   | X     | 501 | GTP  | C5'-O5'-PA-O2A |
| 4   | X     | 503 | GTP  | PB-O3B-PG-O3G  |
| 4   | X     | 503 | GTP  | C5'-O5'-PA-O1A |
| 4   | X     | 503 | GTP  | C5'-O5'-PA-O2A |
| 4   | X     | 501 | GTP  | PB-O3B-PG-O1G  |
| 4   | X     | 501 | GTP  | PB-O3B-PG-O3G  |
| 4   | X     | 501 | GTP  | C5'-O5'-PA-O3A |
| 4   | X     | 503 | GTP  | C5'-O5'-PA-O3A |
| 4   | X     | 503 | GTP  | C4'-C5'-O5'-PA |

There are no ring outliers.

1 monomer is involved in 1 short contact:

| Mol | Chain | Res | Type | Clashes | Symm-Clashes |
|-----|-------|-----|------|---------|--------------|
| 4   | X     | 503 | GTP  | 1       | 0            |

The following is a two-dimensional graphical depiction of Mogul quality analysis of bond lengths, bond angles, torsion angles, and ring geometry for all instances of the Ligand of Interest. In addition, ligands with molecular weight > 250 and outliers as shown on the validation Tables will also be included. For torsion angles, if less than 5% of the Mogul distribution of torsion angles is within 10 degrees of the torsion angle in question, then that torsion angle is considered an outlier. Any bond that is central to one or more torsion angles identified as an outlier by Mogul will be highlighted in the graph. For rings, the root-mean-square deviation (RMSD) between the ring in question and similar rings identified by Mogul is calculated over all ring torsion angles. If the average RMSD is greater than 60 degrees and the minimal RMSD between the ring in question and any Mogul-identified rings is also greater than 60 degrees, then that ring is considered an outlier. The outliers are highlighted in purple. The color gray indicates Mogul did not find sufficient equivalents in the CSD to analyse the geometry.

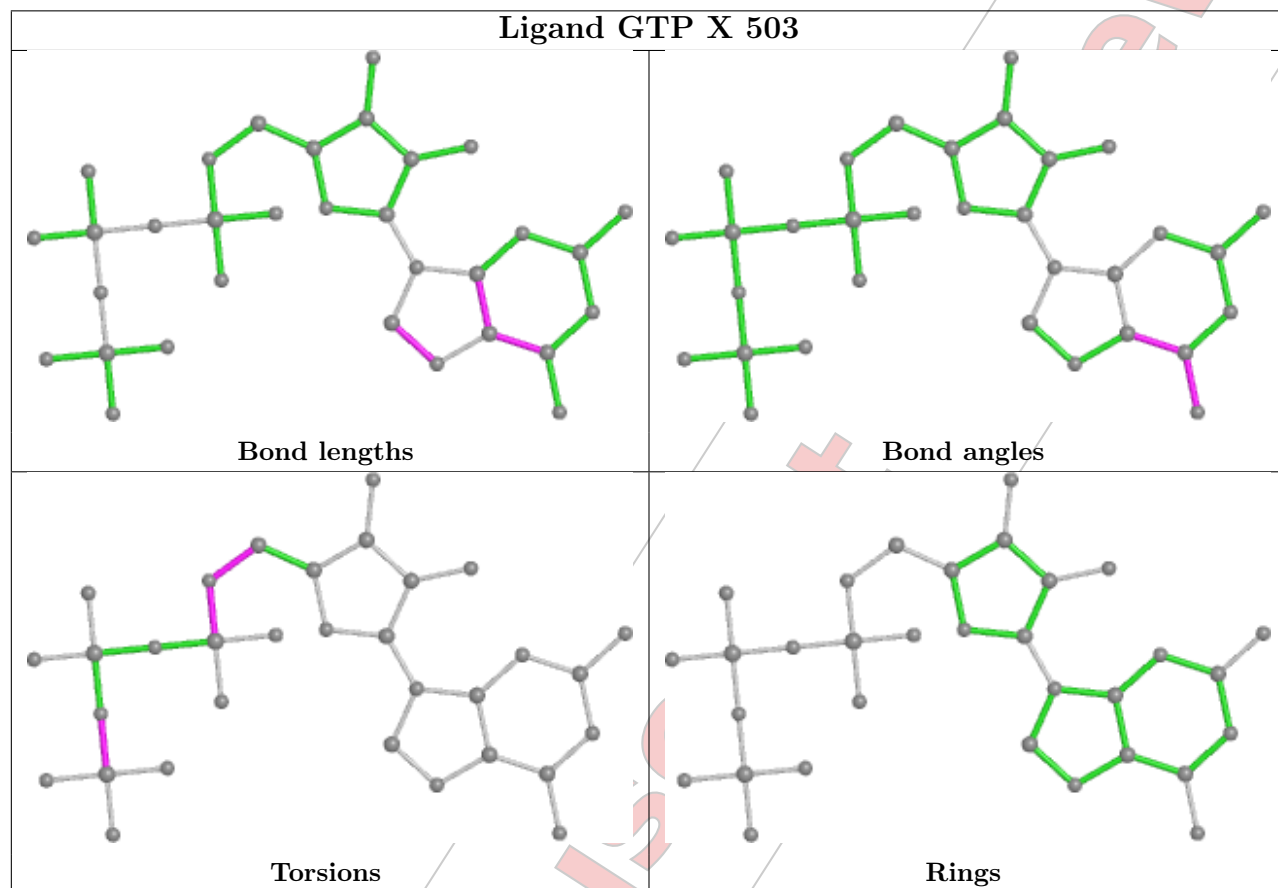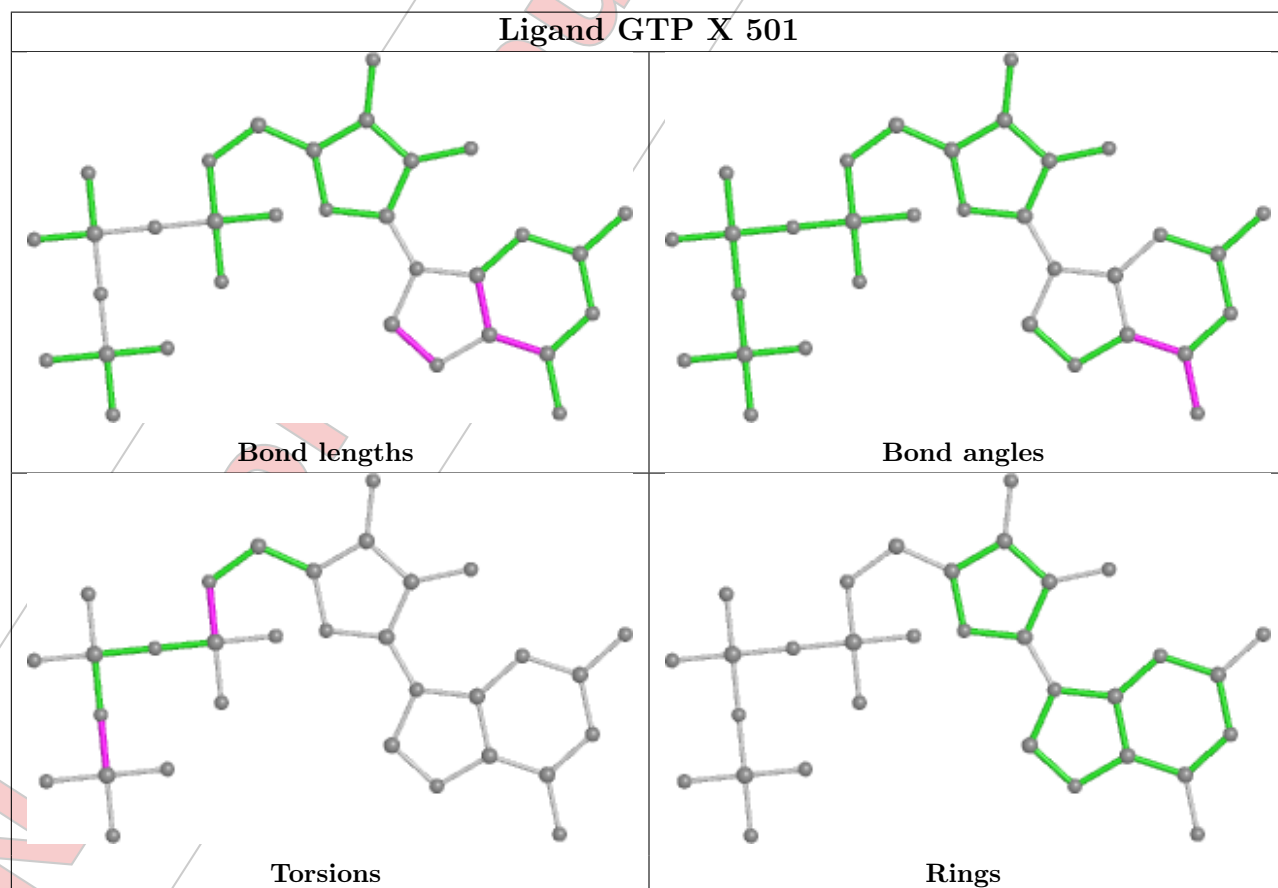

## 5.7 Other polymers [i](#)

There are no such residues in this entry.

## 5.8 Polymer linkage issues [i](#)

The following chains have linkage breaks:

| Mol | Chain | Number of breaks |
|-----|-------|------------------|
| 1   | A     | 1                |

All chain breaks are listed below:

| Model | Chain | Residue-1 | Atom-1 | Residue-2 | Atom-2 | Distance (Å) |
|-------|-------|-----------|--------|-----------|--------|--------------|
| 1     | A     | 40:LYS    | C      | 47:ASP    | N      | 4.92         |

Not For Manuscript Review

## 6 Fit of model and data i

### 6.1 Protein, DNA and RNA chains i

In the following table, the column labelled '#RSRZ > 2' contains the number (and percentage) of RSRZ outliers, followed by percent RSRZ outliers for the chain as percentile scores relative to all X-ray entries and entries of similar resolution. The OWAB column contains the minimum, median, 95<sup>th</sup> percentile and maximum values of the occupancy-weighted average B-factor per residue. The column labelled 'Q < 0.9' lists the number of (and percentage) of residues with an average occupancy less than 0.9.

| Mol | Chain | Analysed         | <RSRZ> | #RSRZ > 2     | OWAB(Å <sup>2</sup> ) | Q < 0.9 |
|-----|-------|------------------|--------|---------------|-----------------------|---------|
| 1   | A     | 431/431 (100%)   | -0.51  | 11 (2%) 56 59 | 14, 29, 58, 109       | 2 (0%)  |
| 2   | B     | 431/431 (100%)   | -0.11  | 25 (5%) 23 24 | 18, 40, 75, 123       | 0       |
| 3   | F     | 155/155 (100%)   | -0.57  | 1 (0%) 89 90  | 19, 30, 53, 70        | 0       |
| All | All   | 1017/1017 (100%) | -0.35  | 37 (3%) 42 46 | 14, 33, 68, 123       | 2 (0%)  |

All (37) RSRZ outliers are listed below:

| Mol | Chain | Res | Type | RSRZ |
|-----|-------|-----|------|------|
| 1   | A     | 437 | VAL  | 7.0  |
| 2   | B     | 285 | ALA  | 6.6  |
| 2   | B     | 283 | TYR  | 6.4  |
| 2   | B     | 39  | ASP  | 5.6  |
| 2   | B     | 282 | GLN  | 5.4  |
| 1   | A     | 337 | THR  | 5.3  |
| 2   | B     | 37  | HIS  | 5.2  |
| 2   | B     | 279 | GLY  | 4.7  |
| 2   | B     | 281 | GLN  | 4.5  |
| 2   | B     | 284 | ARG  | 4.5  |
| 2   | B     | 280 | SER  | 4.3  |
| 2   | B     | 441 | ASP  | 3.8  |
| 1   | A     | 309 | HIS  | 3.7  |
| 1   | A     | 436 | GLY  | 3.7  |
| 1   | A     | 338 | LYS  | 3.6  |
| 2   | B     | 75  | MET  | 3.3  |
| 1   | A     | 348 | PRO  | 3.1  |
| 1   | A     | 1   | MET  | 3.0  |
| 2   | B     | 56  | ALA  | 2.9  |
| 2   | B     | 278 | ARG  | 2.9  |
| 1   | A     | 57  | GLY  | 2.8  |
| 2   | B     | 90  | ASP  | 2.8  |
| 2   | B     | 406 | HIS  | 2.7  |

Continued on next page...

Continued from previous page...

| Mol | Chain | Res    | Type | RSRZ |
|-----|-------|--------|------|------|
| 1   | A     | 39     | ASP  | 2.6  |
| 3   | F     | 167    | LYS  | 2.5  |
| 2   | B     | 337    | ASN  | 2.5  |
| 2   | B     | 85     | GLN  | 2.4  |
| 2   | B     | 179[A] | ASP  | 2.4  |
| 2   | B     | 113    | GLU  | 2.4  |
| 2   | B     | 30     | ILE  | 2.3  |
| 2   | B     | 369    | ARG  | 2.3  |
| 2   | B     | 333    | LEU  | 2.2  |
| 2   | B     | 80     | SER  | 2.2  |
| 2   | B     | 120    | ASP  | 2.2  |
| 1   | A     | 340    | SER  | 2.2  |
| 1   | A     | 215    | ARG  | 2.1  |
| 2   | B     | 70     | LEU  | 2.0  |

## 6.2 Non-standard residues in protein, DNA, RNA chains [i](#)

There are no non-standard protein/DNA/RNA residues in this entry.

## 6.3 Carbohydrates [i](#)

There are no monosaccharides in this entry.

## 6.4 Ligands [i](#)

In the following table, the Atoms column lists the number of modelled atoms in the group and the number defined in the chemical component dictionary. The B-factors column lists the minimum, median, 95<sup>th</sup> percentile and maximum values of B factors of atoms in the group. The column labelled 'Q< 0.9' lists the number of atoms with occupancy less than 0.9.

| Mol | Type | Chain | Res | Atoms | RSCC | RSR  | B-factors(Å <sup>2</sup> ) | Q<0.9 |
|-----|------|-------|-----|-------|------|------|----------------------------|-------|
| 4   | GTP  | X     | 503 | 32/?  | 0.93 | 0.12 | 32,36,48,72                | 0     |
| 4   | GTP  | X     | 501 | 32/?  | 0.97 | 0.09 | 10,18,29,32                | 0     |
| 5   | MG   | X     | 502 | 1/?   | 0.99 | 0.07 | 11,11,11,11                | 0     |

The following is a graphical depiction of the model fit to experimental electron density of all instances of the Ligand of Interest. In addition, ligands with molecular weight > 250 and outliers as shown on the geometry validation Tables will also be included. Each fit is shown from different orientation to approximate a three-dimensional view.

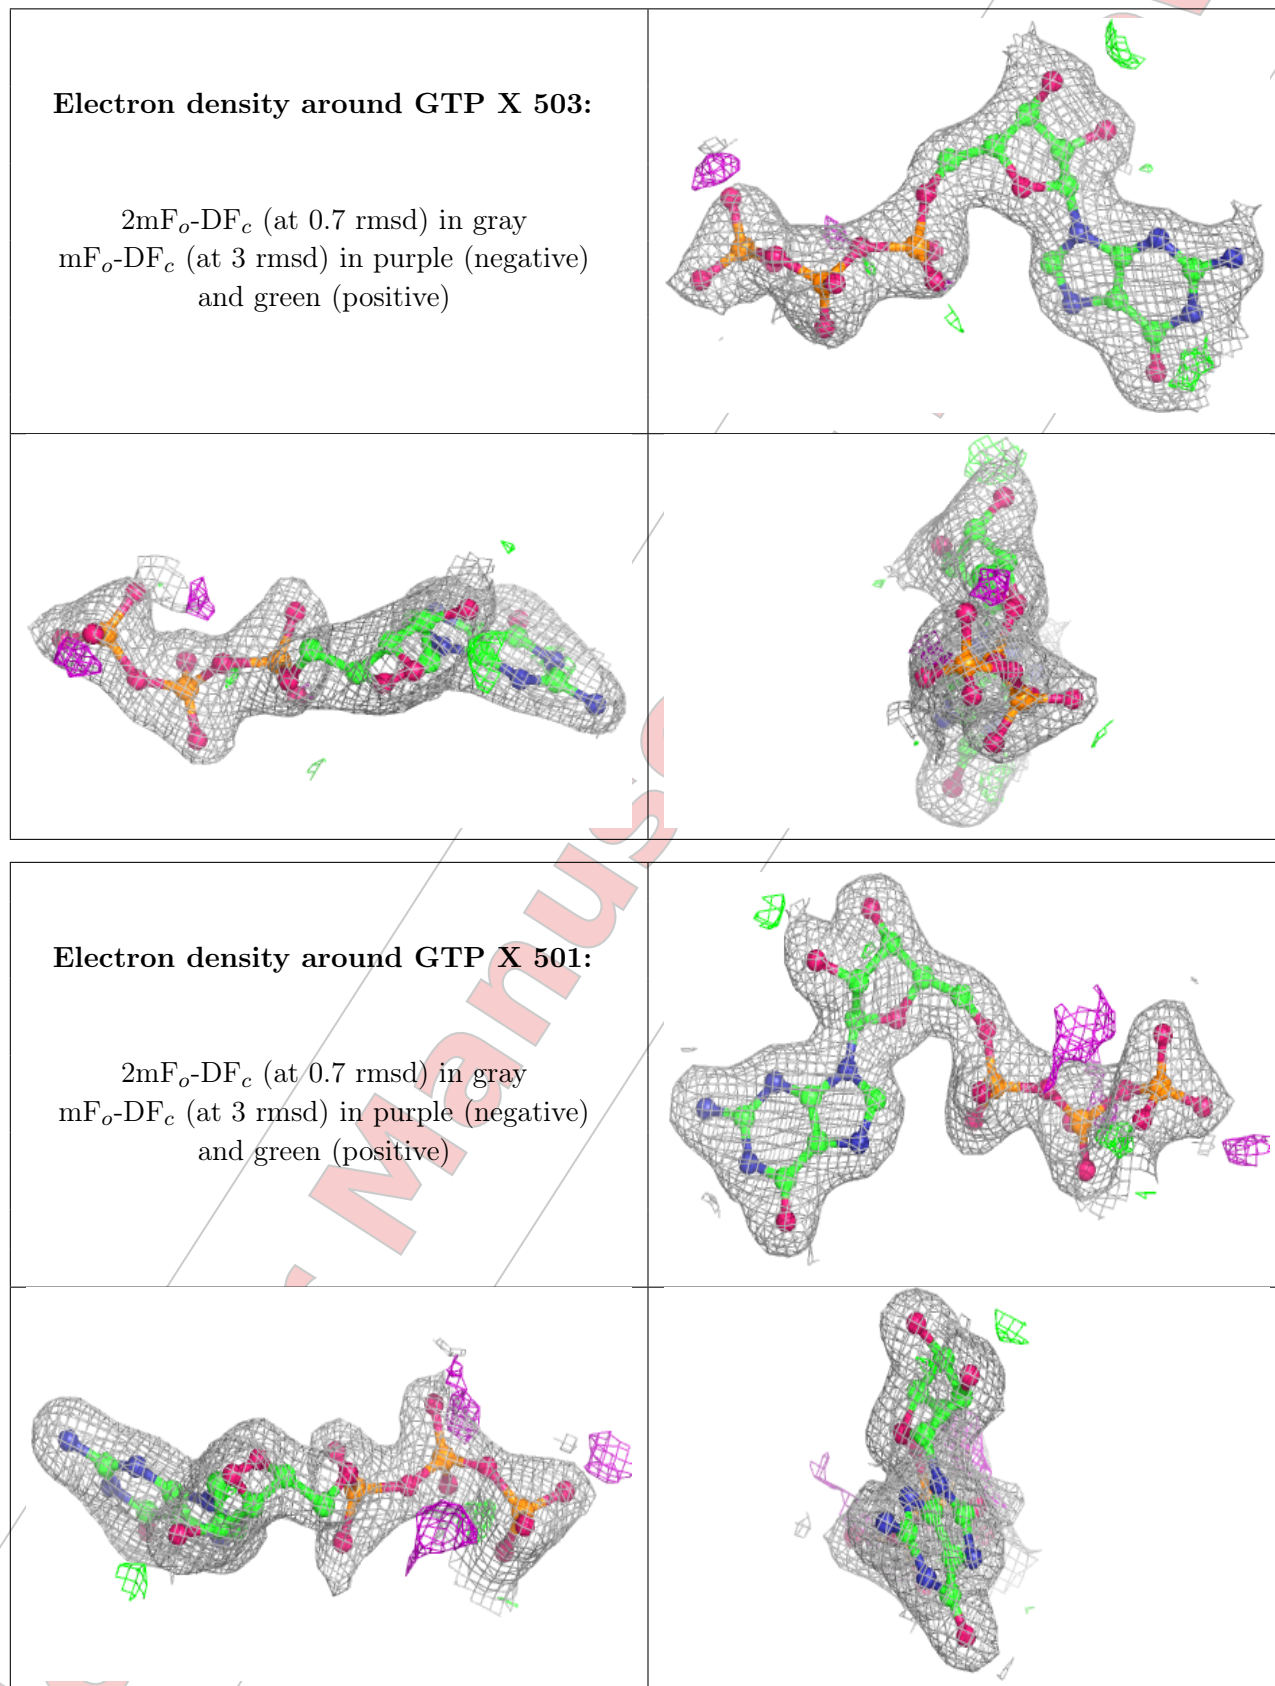

## 6.5 Other polymers [i](#)

There are no such residues in this entry.

Not For Manuscript Review

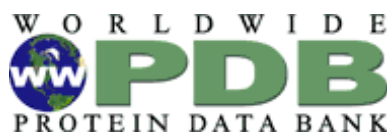

# Preliminary Full wwPDB X-ray Structure Validation Report ⓘ

Feb 15, 2023 – 10:53 am GMT

Deposition ID : D\_1292128504

**This wwPDB validation report is NOT for manuscript review**

This is a Preliminary Full wwPDB X-ray Structure Validation Report.

This report is produced by the wwPDB Deposition System during initial deposition but before annotation of the structure.

We welcome your comments at [validation@mail.wwpdb.org](mailto:validation@mail.wwpdb.org)

A user guide is available at

<https://www.wwpdb.org/validation/2017/XrayValidationReportHelp>

with specific help available everywhere you see the ⓘ symbol.

The types of validation reports are described at

<http://www.wwpdb.org/validation/2017/FAQs#types>.

---

The following versions of software and data (see [references ⓘ](#)) were used in the production of this report:

|                                |   |                                                                    |
|--------------------------------|---|--------------------------------------------------------------------|
| MolProbity                     | : | 4.02b-467                                                          |
| Mogul                          | : | 1.8.4, CSD as541be (2020)                                          |
| Xtriage (Phenix)               | : | 1.13                                                               |
| EDS                            | : | 2.32.1                                                             |
| buster-report                  | : | 1.1.7 (2018)                                                       |
| Percentile statistics          | : | 20191225.v01 (using entries in the PDB archive December 25th 2019) |
| Refmac                         | : | 5.8.0158                                                           |
| CCP4                           | : | 7.0.044 (Gargrove)                                                 |
| Ideal geometry (proteins)      | : | Engh & Huber (2001)                                                |
| Ideal geometry (DNA, RNA)      | : | Parkinson et al. (1996)                                            |
| Validation Pipeline (wwPDB-VP) | : | 2.32.1                                                             |

# 1 Overall quality at a glance i

The following experimental techniques were used to determine the structure:

*X-RAY DIFFRACTION*

The reported resolution of this entry is 2.00 Å.

Percentile scores (ranging between 0-100) for global validation metrics of the entry are shown in the following graphic. The table shows the number of entries on which the scores are based.

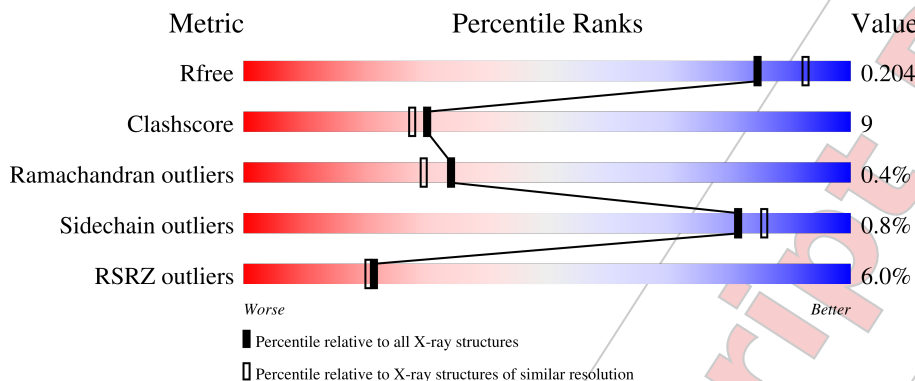

| Metric                | Whole archive<br>(#Entries) | Similar resolution<br>(#Entries, resolution range(Å)) |
|-----------------------|-----------------------------|-------------------------------------------------------|
| $R_{free}$            | 130704                      | 8085 (2.00-2.00)                                      |
| Clashscore            | 141614                      | 9178 (2.00-2.00)                                      |
| Ramachandran outliers | 138981                      | 9054 (2.00-2.00)                                      |
| Sidechain outliers    | 138945                      | 9053 (2.00-2.00)                                      |
| RSRZ outliers         | 127900                      | 7900 (2.00-2.00)                                      |

The table below summarises the geometric issues observed across the polymeric chains and their fit to the electron density. The red, orange, yellow and green segments of the lower bar indicate the fraction of residues that contain outliers for  $\geq 3$ , 2, 1 and 0 types of geometric quality criteria respectively. A grey segment represents the fraction of residues that are not modelled. The numeric value for each fraction is indicated below the corresponding segment, with a dot representing fractions  $\leq 5\%$ . The upper red bar (where present) indicates the fraction of residues that have poor fit to the electron density. The numeric value is given above the bar.

| Mol | Chain | Length | Quality of chain |
|-----|-------|--------|------------------|
| 1   | A     | 435    | <br>3% 82% 17%   |
| 2   | B     | 430    | <br>10% 73% 26%  |
| 3   | F     | 155    | <br>0% 86% 14%   |

## 2 Entry composition [i](#)

There are 9 unique types of molecules in this entry. The entry contains 16106 atoms, of which 7693 are hydrogens and 0 are deuteriums.

In the tables below, the ZeroOcc column contains the number of atoms modelled with zero occupancy, the AltConf column contains the number of residues with at least one atom in alternate conformation and the Trace column contains the number of residues modelled with at most 2 atoms.

- Molecule 1 is a protein called Tubulin alpha-1B chain.

| Mol | Chain | Residues | Atoms |      |      |     |     | ZeroOcc | AltConf | Trace |   |
|-----|-------|----------|-------|------|------|-----|-----|---------|---------|-------|---|
|     |       |          | Total | C    | H    | N   | O   |         |         |       | S |
| 1   | A     | 435      | 6686  | 2150 | 3290 | 576 | 648 | 22      | 0       | 3     | 0 |

- Molecule 2 is a protein called Tubulin beta-2B chain.

| Mol | Chain | Residues | Atoms |      |      |     |     | ZeroOcc | AltConf | Trace |   |
|-----|-------|----------|-------|------|------|-----|-----|---------|---------|-------|---|
|     |       |          | Total | C    | H    | N   | O   |         |         |       | S |
| 2   | B     | 430      | 6546  | 2103 | 3197 | 568 | 651 | 27      | 0       | 2     | 0 |

- Molecule 3 is a protein called Designed Ankyrin Repeat Protein (DARPIN) D1.

| Mol | Chain | Residues | Atoms |     |      |     |     | ZeroOcc | AltConf | Trace |   |
|-----|-------|----------|-------|-----|------|-----|-----|---------|---------|-------|---|
|     |       |          | Total | C   | H    | N   | O   |         |         |       | S |
| 3   | F     | 155      | 2322  | 730 | 1163 | 199 | 227 | 3       | 0       | 1     | 0 |

- Molecule 4 is GUANOSINE-5'-TRIPHOSPHATE (three-letter code: GTP) (formula:  $C_{10}H_{16}N_5O_{14}P_3$ ).



| Mol | Chain | Residues | Atoms |    |    |   |    | ZeroOcc | AltConf |   |
|-----|-------|----------|-------|----|----|---|----|---------|---------|---|
|     |       |          | Total | C  | H  | N | O  |         |         | P |
| 4   | X     | 1        | 44    | 10 | 12 | 5 | 14 | 3       | 0       | 0 |

- Molecule 5 is MAGNESIUM ION (three-letter code: MG) (formula: Mg).

| Mol | Chain | Residues | Atoms |    | ZeroOcc | AltConf |
|-----|-------|----------|-------|----|---------|---------|
|     |       |          | Total | Mg |         |         |
| 5   | X     | 1        | 1     | 1  | 0       | 0       |

- Molecule 6 is GUANOSINE-5'-DIPHOSPHATE (three-letter code: GDP) (formula: C<sub>10</sub>H<sub>15</sub>N<sub>5</sub>O<sub>11</sub>P<sub>2</sub>).

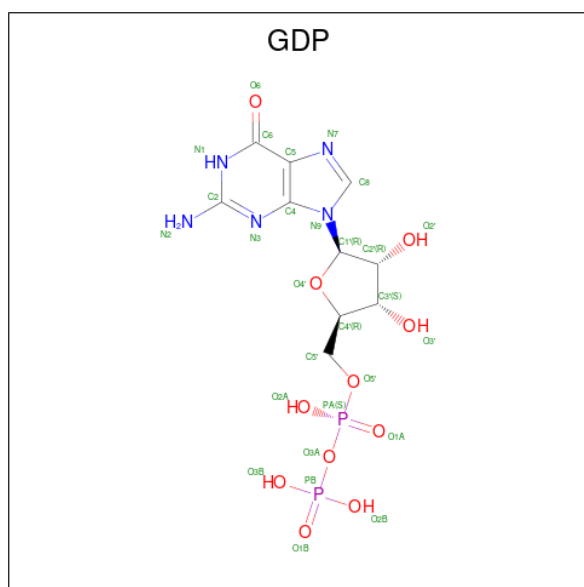

| Mol | Chain | Residues | Atoms |    |    |   |    | ZeroOcc | AltConf |   |
|-----|-------|----------|-------|----|----|---|----|---------|---------|---|
|     |       |          | Total | C  | H  | N | O  |         |         | P |
| 6   | X     | 1        | 40    | 10 | 12 | 5 | 11 | 2       | 0       | 0 |

- Molecule 7 is a ligand with the chemical component id GAO but its atom names do not match the existing wwPDB Chemical Component Dictionary definition for GAO. Consequently no firm identification of ligand chemistry can be made. Once the structure is annotated then an identification and diagram will be given here.

| Mol | Chain | Residues | Atoms |    |    |   |   | ZeroOcc | AltConf |   |
|-----|-------|----------|-------|----|----|---|---|---------|---------|---|
|     |       |          | Total | C  | H  | N | O |         |         | S |
| 7   | X     | 1        | 45    | 19 | 19 | 1 | 5 | 1       | 0       | 0 |

- Molecule 8 is CALCIUM ION (three-letter code: CA) (formula: Ca).

| Mol | Chain | Residues | Atoms |    | ZeroOcc | AltConf |
|-----|-------|----------|-------|----|---------|---------|
| 8   | X     | 1        | Total | Ca | 0       | 0       |
|     |       |          | 1     | 1  |         |         |

- Molecule 9 is water.

| Mol | Chain | Residues | Atoms |     | ZeroOcc | AltConf |
|-----|-------|----------|-------|-----|---------|---------|
| 9   | S     | 421      | Total | O   | 0       | 0       |
|     |       |          | 421   | 421 |         |         |

Not For Manuscript Review

### 3 Residue-property plots

These plots are drawn for all protein, RNA, DNA and oligosaccharide chains in the entry. The first graphic for a chain summarises the proportions of the various outlier classes displayed in the second graphic. The second graphic shows the sequence view annotated by issues in geometry and electron density. Residues are color-coded according to the number of geometric quality criteria for which they contain at least one outlier: green = 0, yellow = 1, orange = 2 and red = 3 or more. A red dot above a residue indicates a poor fit to the electron density ( $RSRZ > 2$ ). Stretches of 2 or more consecutive residues without any outlier are shown as a green connector. Residues present in the sample, but not in the model, are shown in grey.

- Molecule 1: Tubulin alpha-1B chain

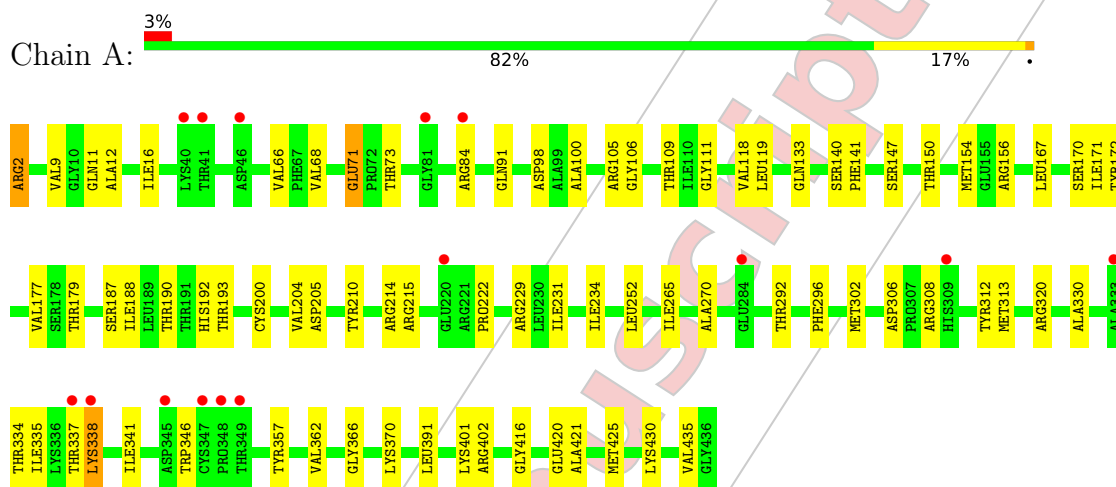

- Molecule 2: Tubulin beta-2B chain

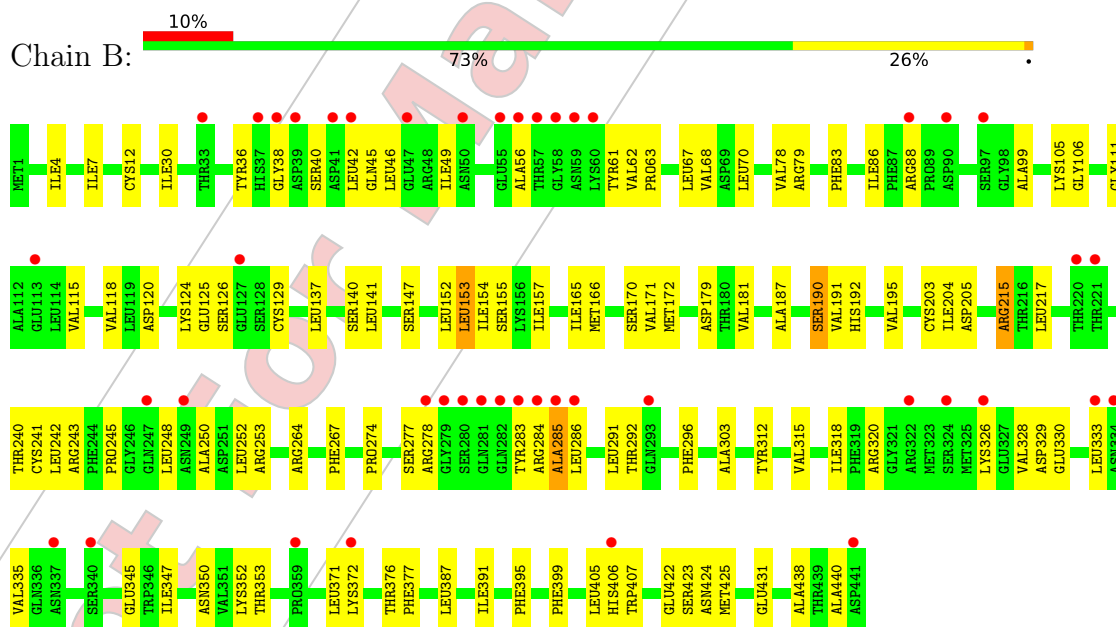

- Molecule 3: Designed Ankyrin Repeat Protein (DARPIN) D1

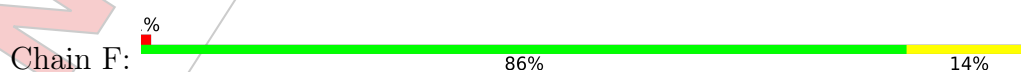

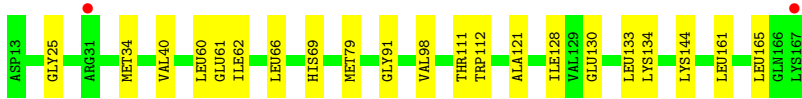

Not For Manuscript Review

## 4 Data and refinement statistics i

| Property                                                                | Value                                                       | Source           |
|-------------------------------------------------------------------------|-------------------------------------------------------------|------------------|
| Space group                                                             | P 1 21 1                                                    | Depositor        |
| Cell constants<br>a, b, c, $\alpha$ , $\beta$ , $\gamma$                | 73.23Å 90.94Å 82.43Å<br>90.00° 96.74° 90.00°                | Depositor        |
| Resolution (Å)                                                          | 13.00 – 2.00<br>15.04 – 1.74                                | Depositor<br>EDS |
| % Data completeness<br>(in resolution range)                            | 94.4 (13.00-2.00)<br>67.9 (15.04-1.74)                      | Depositor<br>EDS |
| $R_{merge}$                                                             | (Not available)                                             | Depositor        |
| $R_{sym}$                                                               | (Not available)                                             | Depositor        |
| $\langle I/\sigma(I) \rangle$ <sup>1</sup>                              | 1.24 (at 1.74Å)                                             | Xtrriage         |
| Refinement program                                                      | PHENIX 1.20_4459                                            | Depositor        |
| R, $R_{free}$                                                           | 0.155 , 0.206<br>0.174 , 0.204                              | Depositor<br>DCC |
| $R_{free}$ test set                                                     | 1038 reflections (1.38%)                                    | wwPDB-VP         |
| Wilson B-factor (Å <sup>2</sup> )                                       | 23.5                                                        | Xtrriage         |
| Anisotropy                                                              | 0.009                                                       | Xtrriage         |
| Bulk solvent $k_{sol}$ (e/Å <sup>3</sup> ), $B_{sol}$ (Å <sup>2</sup> ) | 0.47 , 54.3                                                 | EDS              |
| L-test for twinning <sup>2</sup>                                        | $\langle  L  \rangle = 0.49$ , $\langle L^2 \rangle = 0.32$ | Xtrriage         |
| Estimated twinning fraction                                             | No twinning to report.                                      | Xtrriage         |
| $F_o, F_c$ correlation                                                  | 0.95                                                        | EDS              |
| Total number of atoms                                                   | 16106                                                       | wwPDB-VP         |
| Average B, all atoms (Å <sup>2</sup> )                                  | 31.0                                                        | wwPDB-VP         |

Xtrriage's analysis on translational NCS is as follows: *The largest off-origin peak in the Patterson function is 4.11% of the height of the origin peak. No significant pseudotranslation is detected.*

<sup>1</sup>Intensities estimated from amplitudes.

<sup>2</sup>Theoretical values of  $\langle |L| \rangle$ ,  $\langle L^2 \rangle$  for acentric reflections are 0.5, 0.333 respectively for untwinned datasets, and 0.375, 0.2 for perfectly twinned datasets.

## 5 Model quality i

### 5.1 Standard geometry i

Bond lengths and bond angles in the following residue types are not validated in this section: CA, GAO, GDP, GTP, MG

The Z score for a bond length (or angle) is the number of standard deviations the observed value is removed from the expected value. A bond length (or angle) with  $|Z| > 5$  is considered an outlier worth inspection. RMSZ is the root-mean-square of all Z scores of the bond lengths (or angles).

| Mol | Chain | Bond lengths |               | Bond angles |                |
|-----|-------|--------------|---------------|-------------|----------------|
|     |       | RMSZ         | # Z  >5       | RMSZ        | # Z  >5        |
| 1   | A     | 0.71         | 0/3487        | 0.85        | 0/4739         |
| 2   | B     | 0.69         | 2/3425 (0.1%) | 0.82        | 5/4641 (0.1%)  |
| 3   | F     | 0.62         | 0/1178        | 0.81        | 0/1601         |
| All | All   | 0.69         | 2/8090 (0.0%) | 0.84        | 5/10981 (0.0%) |

Chiral center outliers are detected by calculating the chiral volume of a chiral center and verifying if the center is modelled as a planar moiety or with the opposite hand. A planarity outlier is detected by checking planarity of atoms in a peptide group, atoms in a mainchain group or atoms of a sidechain that are expected to be planar.

| Mol | Chain | #Chirality outliers | #Planarity outliers |
|-----|-------|---------------------|---------------------|
| 1   | A     | 0                   | 6                   |
| 2   | B     | 1                   | 5                   |
| All | All   | 1                   | 11                  |

All (2) bond length outliers are listed below:

| Mol | Chain | Res    | Type | Atoms | Z     | Observed(Å) | Ideal(Å) |
|-----|-------|--------|------|-------|-------|-------------|----------|
| 2   | B     | 431[A] | GLU  | C-N   | -9.49 | 1.12        | 1.34     |
| 2   | B     | 431[B] | GLU  | C-N   | -9.49 | 1.12        | 1.34     |

All (5) bond angle outliers are listed below:

| Mol | Chain | Res | Type | Atoms     | Z     | Observed(°) | Ideal(°) |
|-----|-------|-----|------|-----------|-------|-------------|----------|
| 2   | B     | 283 | TYR  | CB-CA-C   | 9.83  | 130.06      | 110.40   |
| 2   | B     | 153 | LEU  | O-C-N     | 8.62  | 136.49      | 122.70   |
| 2   | B     | 153 | LEU  | CA-C-N    | -5.88 | 104.27      | 117.20   |
| 2   | B     | 179 | ASP  | CB-CG-OD1 | -5.36 | 113.48      | 118.30   |
| 2   | B     | 179 | ASP  | CB-CG-OD2 | 5.11  | 122.89      | 118.30   |

All (1) chirality outliers are listed below:

| Mol | Chain | Res | Type | Atom |
|-----|-------|-----|------|------|
| 2   | B     | 283 | TYR  | CA   |

All (11) planarity outliers are listed below:

| Mol | Chain | Res | Type | Group     |
|-----|-------|-----|------|-----------|
| 1   | A     | 2   | ARG  | Sidechain |
| 1   | A     | 214 | ARG  | Sidechain |
| 1   | A     | 215 | ARG  | Sidechain |
| 1   | A     | 320 | ARG  | Sidechain |
| 1   | A     | 402 | ARG  | Sidechain |
| 1   | A     | 84  | ARG  | Sidechain |
| 2   | B     | 152 | LEU  | Mainchain |
| 2   | B     | 215 | ARG  | Sidechain |
| 2   | B     | 243 | ARG  | Sidechain |
| 2   | B     | 278 | ARG  | Sidechain |
| 2   | B     | 79  | ARG  | Sidechain |

## 5.2 Too-close contacts [i](#)

In the following table, the Non-H and H(model) columns list the number of non-hydrogen atoms and hydrogen atoms in the chain respectively. The H(added) column lists the number of hydrogen atoms added and optimized by MolProbity. The Clashes column lists the number of clashes within the asymmetric unit, whereas Symm-Clashes lists symmetry-related clashes.

| Mol | Chain | Non-H | H(model) | H(added) | Clashes | Symm-Clashes |
|-----|-------|-------|----------|----------|---------|--------------|
| 1   | A     | 3396  | 3290     | 3280     | 52      | 1            |
| 2   | B     | 3349  | 3197     | 3195     | 76      | 0            |
| 3   | F     | 1159  | 1163     | 1162     | 18      | 0            |
| 4   | X     | 32    | 12       | 12       | 1       | 0            |
| 5   | X     | 1     | 0        | 0        | 0       | 0            |
| 6   | X     | 28    | 12       | 12       | 0       | 0            |
| 7   | X     | 26    | 19       | 0        | 3       | 0            |
| 8   | X     | 1     | 0        | 0        | 0       | 0            |
| 9   | S     | 421   | 0        | 0        | 9       | 1            |
| All | All   | 8413  | 7693     | 7661     | 146     | 1            |

The all-atom clashscore is defined as the number of clashes found per 1000 atoms (including hydrogen atoms). The all-atom clashscore for this structure is 9.

All (146) close contacts within the same asymmetric unit are listed below, sorted by their clash magnitude.

| Atom-1           | Atom-2           | Interatomic distance (Å) | Clash overlap (Å) |
|------------------|------------------|--------------------------|-------------------|
| 2:B:248:LEU:HD23 | 2:B:250:ALA:HB2  | 1.42                     | 0.98              |
| 2:B:172:MET:HG3  | 2:B:387:LEU:HD11 | 1.65                     | 0.79              |
| 2:B:286:LEU:HD23 | 2:B:291:LEU:HD23 | 1.75                     | 0.68              |
| 1:A:330:ALA:O    | 1:A:334:THR:HG23 | 1.95                     | 0.67              |
| 3:F:79:MET:CE    | 3:F:111:THR:HG21 | 2.23                     | 0.67              |
| 2:B:118:VAL:HG11 | 2:B:153:LEU:HD21 | 1.76                     | 0.67              |
| 2:B:292:THR:HG22 | 2:B:335:VAL:HG21 | 1.80                     | 0.64              |
| 3:F:34:MET:HE3   | 3:F:66:LEU:HD23  | 1.80                     | 0.63              |
| 2:B:328:VAL:HG12 | 2:B:353:THR:HG21 | 1.82                     | 0.61              |
| 2:B:46:LEU:HD11  | 2:B:61:TYR:CZ    | 2.35                     | 0.61              |
| 2:B:318:ILE:CG2  | 2:B:376:THR:HB   | 2.31                     | 0.60              |
| 2:B:286:LEU:HD23 | 2:B:291:LEU:CD2  | 2.31                     | 0.60              |
| 1:A:270:ALA:HB3  | 1:A:302:MET:HE2  | 1.84                     | 0.60              |
| 1:A:204:VAL:HG11 | 1:A:231:ILE:HG12 | 1.84                     | 0.59              |
| 1:A:177:VAL:HG13 | 1:A:177:VAL:O    | 2.03                     | 0.58              |
| 2:B:318:ILE:HG23 | 2:B:318:ILE:O    | 2.03                     | 0.58              |
| 2:B:46:LEU:HD21  | 2:B:61:TYR:OH    | 2.04                     | 0.58              |
| 1:A:2:ARG:HB3    | 1:A:133:GLN:CG   | 2.35                     | 0.57              |
| 7:X:604:GAO:C11  | 7:X:604:GAO:O1   | 2.53                     | 0.57              |
| 1:A:416:GLY:O    | 1:A:420:GLU:HG3  | 2.04                     | 0.57              |
| 1:A:188:ILE:HG23 | 1:A:425:MET:HG2  | 1.86                     | 0.57              |
| 3:F:79:MET:HE1   | 3:F:111:THR:HG21 | 1.85                     | 0.57              |
| 2:B:62:VAL:HG11  | 2:B:88:ARG:HG3   | 1.87                     | 0.56              |
| 2:B:205:ASP:HB3  | 2:B:303:ALA:HA   | 1.88                     | 0.56              |
| 2:B:106:GLY:O    | 2:B:111:GLY:HA3  | 2.05                     | 0.56              |
| 2:B:274:PRO:HG2  | 2:B:371:LEU:HD22 | 1.88                     | 0.56              |
| 3:F:60:LEU:HD11  | 3:F:98:VAL:HG21  | 1.86                     | 0.56              |
| 2:B:68:VAL:HG11  | 2:B:118:VAL:HG21 | 1.87                     | 0.56              |
| 2:B:352:LYS:HB2  | 7:X:604:GAO:C17  | 2.37                     | 0.55              |
| 2:B:153:LEU:O    | 2:B:157:ILE:HG13 | 2.07                     | 0.55              |
| 3:F:61:GLU:HB2   | 9:S:155:HOH:O    | 2.07                     | 0.54              |
| 2:B:217:LEU:HD13 | 2:B:277:SER:OG   | 2.08                     | 0.54              |
| 2:B:345:GLU:HG3  | 2:B:440:ALA:HB2  | 1.90                     | 0.53              |
| 3:F:34:MET:HE2   | 3:F:40:VAL:HG21  | 1.90                     | 0.53              |
| 1:A:210:TYR:CE1  | 1:A:222:PRO:HD2  | 2.43                     | 0.53              |
| 2:B:63:PRO:CD    | 2:B:86:ILE:HG13  | 2.39                     | 0.53              |
| 1:A:312:TYR:CE2  | 1:A:341:ILE:HG23 | 2.44                     | 0.53              |
| 2:B:46:LEU:HD11  | 2:B:61:TYR:CE2   | 2.43                     | 0.53              |
| 2:B:83:PHE:O     | 2:B:86:ILE:HG22  | 2.07                     | 0.53              |
| 3:F:79:MET:HE3   | 3:F:111:THR:HG21 | 1.90                     | 0.52              |
| 1:A:16:ILE:HD13  | 1:A:171:ILE:HD11 | 1.89                     | 0.52              |
| 2:B:7:ILE:O      | 2:B:137:LEU:HA   | 2.09                     | 0.52              |

Continued on next page...

Continued from previous page...

| Atom-1           | Atom-2           | Interatomic distance (Å) | Clash overlap (Å) |
|------------------|------------------|--------------------------|-------------------|
| 2:B:395:PHE:CE1  | 2:B:422:GLU:HB2  | 2.44                     | 0.52              |
| 1:A:362:VAL:HG12 | 9:S:549:HOH:O    | 2.09                     | 0.52              |
| 2:B:347:ILE:HG22 | 2:B:350:ASN:HB3  | 1.92                     | 0.52              |
| 1:A:337:THR:O    | 1:A:338:LYS:CB   | 2.58                     | 0.52              |
| 2:B:284:ARG:O    | 2:B:285:ALA:HB3  | 2.09                     | 0.52              |
| 2:B:326:LYS:O    | 2:B:330:GLU:HG3  | 2.10                     | 0.52              |
| 3:F:34:MET:CE    | 3:F:69:HIS:HB2   | 2.40                     | 0.52              |
| 2:B:30:ILE:HD13  | 2:B:30:ILE:N     | 2.25                     | 0.52              |
| 2:B:318:ILE:HG23 | 2:B:376:THR:HB   | 1.94                     | 0.50              |
| 2:B:12:CYS:CB    | 2:B:140:SER:HB3  | 2.42                     | 0.50              |
| 1:A:172:TYR:CE2  | 1:A:391:LEU:HD22 | 2.46                     | 0.50              |
| 1:A:141:PHE:CE1  | 1:A:170:SER:HB3  | 2.46                     | 0.50              |
| 2:B:120:ASP:O    | 2:B:124:LYS:HD2  | 2.12                     | 0.50              |
| 3:F:130:GLU:O    | 3:F:134:LYS:HG2  | 2.11                     | 0.50              |
| 2:B:315:VAL:HG11 | 2:B:377:PHE:CE1  | 2.46                     | 0.50              |
| 1:A:306:ASP:OD1  | 1:A:308:ARG:HD3  | 2.11                     | 0.50              |
| 2:B:141:LEU:HD21 | 2:B:170:SER:HB3  | 1.94                     | 0.50              |
| 2:B:203:CYS:SG   | 2:B:267:PHE:HB3  | 2.52                     | 0.50              |
| 2:B:315:VAL:CG1  | 2:B:377:PHE:CE1  | 2.95                     | 0.49              |
| 2:B:67:LEU:CD2   | 2:B:78:VAL:HG11  | 2.42                     | 0.49              |
| 7:X:604:GAO:C15  | 7:X:604:GAO:S    | 3.00                     | 0.49              |
| 3:F:34:MET:HE2   | 3:F:40:VAL:CG2   | 2.42                     | 0.49              |
| 1:A:2:ARG:HB3    | 1:A:133:GLN:HG2  | 1.94                     | 0.48              |
| 1:A:265:ILE:O    | 1:A:265:ILE:HG13 | 2.13                     | 0.48              |
| 3:F:34:MET:CE    | 3:F:66:LEU:HD23  | 2.43                     | 0.48              |
| 2:B:12:CYS:HB3   | 2:B:140:SER:HB3  | 1.96                     | 0.48              |
| 1:A:106:GLY:O    | 1:A:111:GLY:HA3  | 2.14                     | 0.47              |
| 1:A:193:THR:HG23 | 9:S:550:HOH:O    | 2.14                     | 0.47              |
| 2:B:192:HIS:CE1  | 2:B:424:ASN:HD22 | 2.32                     | 0.47              |
| 2:B:46:LEU:HA    | 2:B:49:ILE:HB    | 1.97                     | 0.47              |
| 2:B:67:LEU:HD22  | 2:B:78:VAL:HG11  | 1.97                     | 0.47              |
| 2:B:406:HIS:CE1  | 2:B:407:TRP:CD1  | 3.02                     | 0.47              |
| 1:A:401:LYS:HE3  | 2:B:438:ALA:HB1  | 1.96                     | 0.47              |
| 1:A:234:ILE:HG21 | 1:A:302:MET:SD   | 2.55                     | 0.47              |
| 1:A:292:THR:HG22 | 1:A:335:ILE:HD12 | 1.97                     | 0.47              |
| 2:B:312:TYR:CE1  | 2:B:377:PHE:HZ   | 2.33                     | 0.47              |
| 3:F:34:MET:HE1   | 3:F:69:HIS:HB2   | 1.97                     | 0.47              |
| 1:A:2:ARG:HB3    | 1:A:133:GLN:HG3  | 1.96                     | 0.46              |
| 2:B:312:TYR:CZ   | 2:B:377:PHE:CZ   | 3.04                     | 0.46              |
| 1:A:430:LYS:HE2  | 9:S:569:HOH:O    | 2.15                     | 0.46              |
| 2:B:171:VAL:HA   | 2:B:204:ILE:O    | 2.14                     | 0.46              |

Continued on next page...

Continued from previous page...

| Atom-1           | Atom-2            | Interatomic distance (Å) | Clash overlap (Å) |
|------------------|-------------------|--------------------------|-------------------|
| 1:A:210:TYR:CZ   | 1:A:222:PRO:HD2   | 2.50                     | 0.46              |
| 1:A:362:VAL:HA   | 9:S:567:HOH:O     | 2.15                     | 0.46              |
| 1:A:229:ARG:CD   | 1:A:366:GLY:HA2   | 2.46                     | 0.46              |
| 2:B:147:SER:HB2  | 2:B:190:SER:OG    | 2.15                     | 0.46              |
| 2:B:165:ILE:HG21 | 2:B:252:LEU:HB3   | 1.98                     | 0.46              |
| 3:F:34:MET:HE1   | 3:F:66:LEU:HA     | 1.98                     | 0.45              |
| 2:B:312:TYR:CE1  | 2:B:377:PHE:CZ    | 3.05                     | 0.45              |
| 1:A:100:ALA:HB2  | 2:B:253:ARG:HD2   | 1.98                     | 0.45              |
| 3:F:121:ALA:HB1  | 3:F:161:LEU:HD21  | 1.98                     | 0.45              |
| 1:A:119:LEU:CD1  | 1:A:156:ARG:NH2   | 2.80                     | 0.45              |
| 2:B:205:ASP:CB   | 2:B:303:ALA:HA    | 2.46                     | 0.45              |
| 2:B:241:CYS:O    | 2:B:250:ALA:HB3   | 2.16                     | 0.45              |
| 1:A:296:PHE:CE1  | 1:A:335:ILE:HD13  | 2.52                     | 0.45              |
| 3:F:112:TRP:C    | 3:F:144:LYS:HG3   | 2.37                     | 0.45              |
| 2:B:36:TYR:CZ    | 2:B:38:GLY:HA3    | 2.52                     | 0.45              |
| 2:B:88:ARG:NH1   | 2:B:125:GLU:OE2   | 2.50                     | 0.45              |
| 2:B:70:LEU:HD21  | 2:B:111:GLY:HA2   | 1.99                     | 0.45              |
| 1:A:12:ALA:HB3   | 1:A:140:SER:HB3   | 1.99                     | 0.44              |
| 1:A:179:THR:HG21 | 9:S:175:HOH:O     | 2.17                     | 0.44              |
| 1:A:362:VAL:HG21 | 1:A:370:LYS:NZ    | 2.33                     | 0.44              |
| 1:A:362:VAL:HA   | 9:S:549:HOH:O     | 2.16                     | 0.44              |
| 2:B:63:PRO:HD2   | 2:B:86:ILE:HG13   | 2.00                     | 0.44              |
| 2:B:126:SER:O    | 2:B:129:CYS:HB2   | 2.17                     | 0.44              |
| 1:A:187:SER:HB3  | 1:A:391:LEU:HD21  | 2.00                     | 0.44              |
| 1:A:71:GLU:HG2   | 1:A:98:ASP:HB3    | 1.99                     | 0.43              |
| 2:B:399:PHE:CE1  | 2:B:405:LEU:HD11  | 2.53                     | 0.43              |
| 1:A:9:VAL:HG22   | 1:A:68[B]:VAL:CG1 | 2.48                     | 0.43              |
| 1:A:150:THR:O    | 1:A:154:MET:HG2   | 2.18                     | 0.43              |
| 1:A:270:ALA:HB3  | 1:A:302:MET:CE    | 2.45                     | 0.43              |
| 2:B:328:VAL:CG1  | 2:B:353:THR:HG21  | 2.47                     | 0.43              |
| 1:A:167:LEU:HD22 | 1:A:252:LEU:HD22  | 2.00                     | 0.43              |
| 2:B:296:PHE:CZ   | 2:B:377:PHE:HE1   | 2.37                     | 0.43              |
| 1:A:71:GLU:OE1   | 1:A:73:THR:HG23   | 2.19                     | 0.42              |
| 2:B:36:TYR:CE1   | 2:B:38:GLY:HA3    | 2.54                     | 0.42              |
| 2:B:154:ILE:HG23 | 2:B:166:MET:HG2   | 2.00                     | 0.42              |
| 2:B:88:ARG:NH1   | 2:B:125:GLU:CD    | 2.73                     | 0.42              |
| 2:B:172:MET:HE2  | 2:B:203:CYS:HA    | 2.02                     | 0.42              |
| 1:A:105:ARG:HA   | 1:A:109:THR:OG1   | 2.20                     | 0.42              |
| 1:A:147:SER:HB2  | 1:A:190:THR:HB    | 2.02                     | 0.42              |
| 1:A:192:HIS:CG   | 1:A:421:ALA:HA    | 2.55                     | 0.42              |
| 1:A:346:TRP:CZ2  | 1:A:435:VAL:HG22  | 2.55                     | 0.42              |

Continued on next page...

Continued from previous page...

| Atom-1             | Atom-2           | Interatomic distance (Å) | Clash overlap (Å) |
|--------------------|------------------|--------------------------|-------------------|
| 3:F:25:GLY:HA2     | 3:F:62:ILE:HD12  | 2.01                     | 0.42              |
| 3:F:91:GLY:HA2     | 3:F:128:ILE:CD1  | 2.50                     | 0.42              |
| 2:B:240:THR:OG1    | 2:B:320:ARG:HD2  | 2.20                     | 0.42              |
| 2:B:42:LEU:CA      | 2:B:45:GLN:N     | 2.83                     | 0.41              |
| 1:A:313:MET:SD     | 1:A:435:VAL:HG11 | 2.61                     | 0.41              |
| 2:B:387:LEU:HD23   | 2:B:387:LEU:C    | 2.40                     | 0.41              |
| 2:B:329:ASP:O      | 2:B:333:LEU:HD13 | 2.19                     | 0.41              |
| 2:B:391:ILE:HG22   | 2:B:425:MET:HE1  | 2.03                     | 0.41              |
| 2:B:4:ILE:CD1      | 2:B:242:LEU:HD13 | 2.51                     | 0.41              |
| 1:A:11:GLN:HB2     | 9:S:39:HOH:O     | 2.20                     | 0.41              |
| 1:A:68[A]:VAL:HG11 | 1:A:118:VAL:HG21 | 2.03                     | 0.41              |
| 2:B:187:ALA:O      | 2:B:191:VAL:HG23 | 2.21                     | 0.41              |
| 1:A:66:VAL:HG22    | 1:A:91:GLN:OE1   | 2.21                     | 0.41              |
| 2:B:12:CYS:SG      | 2:B:171:VAL:HG21 | 2.61                     | 0.41              |
| 2:B:99:ALA:O       | 2:B:105:LYS:HD2  | 2.21                     | 0.41              |
| 3:F:133:LEU:HD11   | 3:F:165:LEU:HD23 | 2.02                     | 0.41              |
| 1:A:167:LEU:HG     | 1:A:200:CYS:HB3  | 2.03                     | 0.40              |
| 2:B:181:VAL:HG22   | 9:S:372:HOH:O    | 2.21                     | 0.40              |
| 2:B:195:VAL:HG13   | 2:B:264:ARG:HG2  | 2.02                     | 0.40              |
| 2:B:115:VAL:HG23   | 2:B:153:LEU:HD13 | 2.02                     | 0.40              |
| 1:A:179:THR:HG23   | 4:X:501:GTP:H2'  | 2.02                     | 0.40              |

All (1) symmetry-related close contacts are listed below. The label for Atom-2 includes the symmetry operator and encoded unit-cell translations to be applied.

| Atom-1         | Atom-2               | Interatomic distance (Å) | Clash overlap (Å) |
|----------------|----------------------|--------------------------|-------------------|
| 1:A:357:TYR:OH | 9:S:101:HOH:O[1_456] | 2.00                     | 0.20              |

## 5.3 Torsion angles [i](#)

### 5.3.1 Protein backbone [i](#)

In the following table, the Percentiles column shows the percent Ramachandran outliers of the chain as a percentile score with respect to all X-ray entries followed by that with respect to entries of similar resolution.

The Analysed column shows the number of residues for which the backbone conformation was analysed, and the total number of residues.

| Mol | Chain | Analysed         | Favoured  | Allowed | Outliers | Percentiles |     |
|-----|-------|------------------|-----------|---------|----------|-------------|-----|
| 1   | A     | 436/435 (100%)   | 426 (98%) | 9 (2%)  | 1 (0%)   | 47          | 44  |
| 2   | B     | 428/430 (100%)   | 410 (96%) | 15 (4%) | 3 (1%)   | 22          | 16  |
| 3   | F     | 154/155 (99%)    | 152 (99%) | 2 (1%)  | 0        | 100         | 100 |
| All | All   | 1018/1020 (100%) | 988 (97%) | 26 (3%) | 4 (0%)   | 34          | 30  |

All (4) Ramachandran outliers are listed below:

| Mol | Chain | Res | Type |
|-----|-------|-----|------|
| 1   | A     | 338 | LYS  |
| 2   | B     | 285 | ALA  |
| 2   | B     | 245 | PRO  |
| 2   | B     | 56  | ALA  |

### 5.3.2 Protein sidechains [i](#)

In the following table, the Percentiles column shows the percent sidechain outliers of the chain as a percentile score with respect to all X-ray entries followed by that with respect to entries of similar resolution.

The Analysed column shows the number of residues for which the sidechain conformation was analysed, and the total number of residues.

| Mol | Chain | Analysed       | Rotameric  | Outliers | Percentiles |     |
|-----|-------|----------------|------------|----------|-------------|-----|
| 1   | A     | 366/366 (100%) | 365 (100%) | 1 (0%)   | 92          | 95  |
| 2   | B     | 363/371 (98%)  | 357 (98%)  | 6 (2%)   | 60          | 65  |
| 3   | F     | 121/120 (101%) | 121 (100%) | 0        | 100         | 100 |
| All | All   | 850/857 (99%)  | 843 (99%)  | 7 (1%)   | 81          | 86  |

All (7) residues with a non-rotameric sidechain are listed below:

| Mol | Chain | Res | Type |
|-----|-------|-----|------|
| 1   | A     | 71  | GLU  |
| 2   | B     | 40  | SER  |
| 2   | B     | 155 | SER  |
| 2   | B     | 190 | SER  |
| 2   | B     | 215 | ARG  |
| 2   | B     | 372 | LYS  |
| 2   | B     | 423 | SER  |

Sometimes sidechains can be flipped to improve hydrogen bonding and reduce clashes. All (4) such sidechains are listed below:

| Mol | Chain | Res | Type |
|-----|-------|-----|------|
| 1   | A     | 31  | GLN  |
| 2   | B     | 300 | ASN  |
| 2   | B     | 331 | GLN  |
| 2   | B     | 406 | HIS  |

### 5.3.3 RNA [i](#)

There are no RNA molecules in this entry.

### 5.4 Non-standard residues in protein, DNA, RNA chains [i](#)

There are no non-standard protein/DNA/RNA residues in this entry.

### 5.5 Carbohydrates [i](#)

There are no monosaccharides in this entry.

### 5.6 Ligand geometry [i](#)

Of 5 ligands modelled in this entry, 2 are monoatomic and 1 could not be matched to an existing wwPDB Chemical Component Dictionary definition at this stage - leaving 2 for Mogul analysis.

In the following table, the Counts columns list the number of bonds (or angles) for which Mogul statistics could be retrieved, the number of bonds (or angles) that are observed in the model and the number of bonds (or angles) that are defined in the Chemical Component Dictionary. The Link column lists molecule types, if any, to which the group is linked. The Z score for a bond length (or angle) is the number of standard deviations the observed value is removed from the expected value. A bond length (or angle) with  $|Z| > 2$  is considered an outlier worth inspection. RMSZ is the root-mean-square of all Z scores of the bond lengths (or angles).

| Mol | Type | Chain | Res | Link | Bond lengths |      |             | Bond angles |      |             |
|-----|------|-------|-----|------|--------------|------|-------------|-------------|------|-------------|
|     |      |       |     |      | Counts       | RMSZ | $\# Z  > 2$ | Counts      | RMSZ | $\# Z  > 2$ |
| 6   | GDP  | X     | 503 | -    | 24,30,30     | 1.38 | 5 (20%)     | 30,47,47    | 0.80 | 1 (3%)      |
| 4   | GTP  | X     | 501 | 5    | 26,34,34     | 1.07 | 2 (7%)      | 32,54,54    | 0.73 | 0           |

In the following table, the Chirals column lists the number of chiral outliers, the number of chiral centers analysed, the number of these observed in the model and the number defined in the Chemical Component Dictionary. Similar counts are reported in the Torsion and Rings columns. ' ' means no outliers of that kind were identified.

| Mol | Type | Chain | Res | Link | Chirals | Torsions   | Rings   |
|-----|------|-------|-----|------|---------|------------|---------|
| 6   | GDP  | X     | 503 | -    | -       | 6/12/32/32 | 0/3/3/3 |
| 4   | GTP  | X     | 501 | 5    | -       | 5/18/38/38 | 0/3/3/3 |

All (7) bond length outliers are listed below:

| Mol | Chain | Res | Type | Atoms  | Z     | Observed(Å) | Ideal(Å) |
|-----|-------|-----|------|--------|-------|-------------|----------|
| 6   | X     | 503 | GDP  | PB-O3B | -4.09 | 1.39        | 1.54     |
| 6   | X     | 503 | GDP  | C5-C6  | -3.04 | 1.41        | 1.47     |
| 4   | X     | 501 | GTP  | C5-C6  | -2.76 | 1.41        | 1.47     |
| 6   | X     | 503 | GDP  | C8-N7  | -2.28 | 1.31        | 1.35     |
| 4   | X     | 501 | GTP  | C8-N7  | -2.21 | 1.31        | 1.35     |
| 6   | X     | 503 | GDP  | PB-O2B | -2.11 | 1.46        | 1.54     |
| 6   | X     | 503 | GDP  | C5-C4  | -2.00 | 1.38        | 1.43     |

All (1) bond angle outliers are listed below:

| Mol | Chain | Res | Type | Atoms    | Z    | Observed(°) | Ideal(°) |
|-----|-------|-----|------|----------|------|-------------|----------|
| 6   | X     | 503 | GDP  | O6-C6-C5 | 2.17 | 128.60      | 124.37   |

There are no chirality outliers.

All (11) torsion outliers are listed below:

| Mol | Chain | Res | Type | Atoms          |
|-----|-------|-----|------|----------------|
| 4   | X     | 501 | GTP  | C5'-O5'-PA-O1A |
| 4   | X     | 501 | GTP  | C5'-O5'-PA-O2A |
| 6   | X     | 503 | GDP  | C5'-O5'-PA-O1A |
| 6   | X     | 503 | GDP  | C5'-O5'-PA-O2A |
| 6   | X     | 503 | GDP  | C4'-C5'-O5'-PA |
| 6   | X     | 503 | GDP  | PB-O3A-PA-O1A  |
| 4   | X     | 501 | GTP  | PB-O3B-PG-O3G  |
| 6   | X     | 503 | GDP  | PA-O3A-PB-O3B  |
| 4   | X     | 501 | GTP  | C5'-O5'-PA-O3A |
| 6   | X     | 503 | GDP  | C5'-O5'-PA-O3A |
| 4   | X     | 501 | GTP  | C4'-C5'-O5'-PA |

There are no ring outliers.

1 monomer is involved in 1 short contact:

| Mol | Chain | Res | Type | Clashes | Symm-Clashes |
|-----|-------|-----|------|---------|--------------|
| 4   | X     | 501 | GTP  | 1       | 0            |

The following is a two-dimensional graphical depiction of Mogul quality analysis of bond lengths, bond angles, torsion angles, and ring geometry for all instances of the Ligand of Interest. In addition, ligands with molecular weight > 250 and outliers as shown on the validation Tables will also be included. For torsion angles, if less than 5% of the Mogul distribution of torsion angles is within 10 degrees of the torsion angle in question, then that torsion angle is considered an outlier. Any bond that is central to one or more torsion angles identified as an outlier by Mogul will be highlighted in the graph. For rings, the root-mean-square deviation (RMSD) between the ring in question and similar rings identified by Mogul is calculated over all ring torsion angles. If the average RMSD is greater than 60 degrees and the minimal RMSD between the ring in question and any Mogul-identified rings is also greater than 60 degrees, then that ring is considered an outlier. The outliers are highlighted in purple. The color gray indicates Mogul did not find sufficient equivalents in the CSD to analyse the geometry.

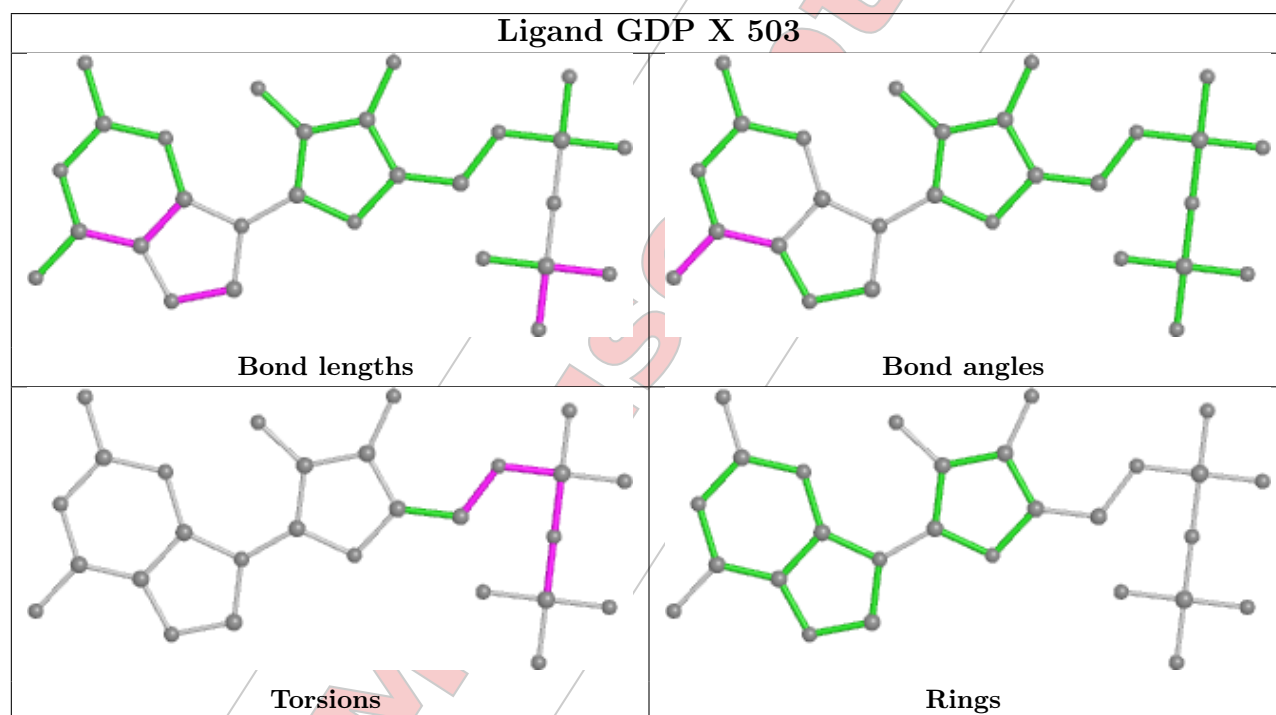

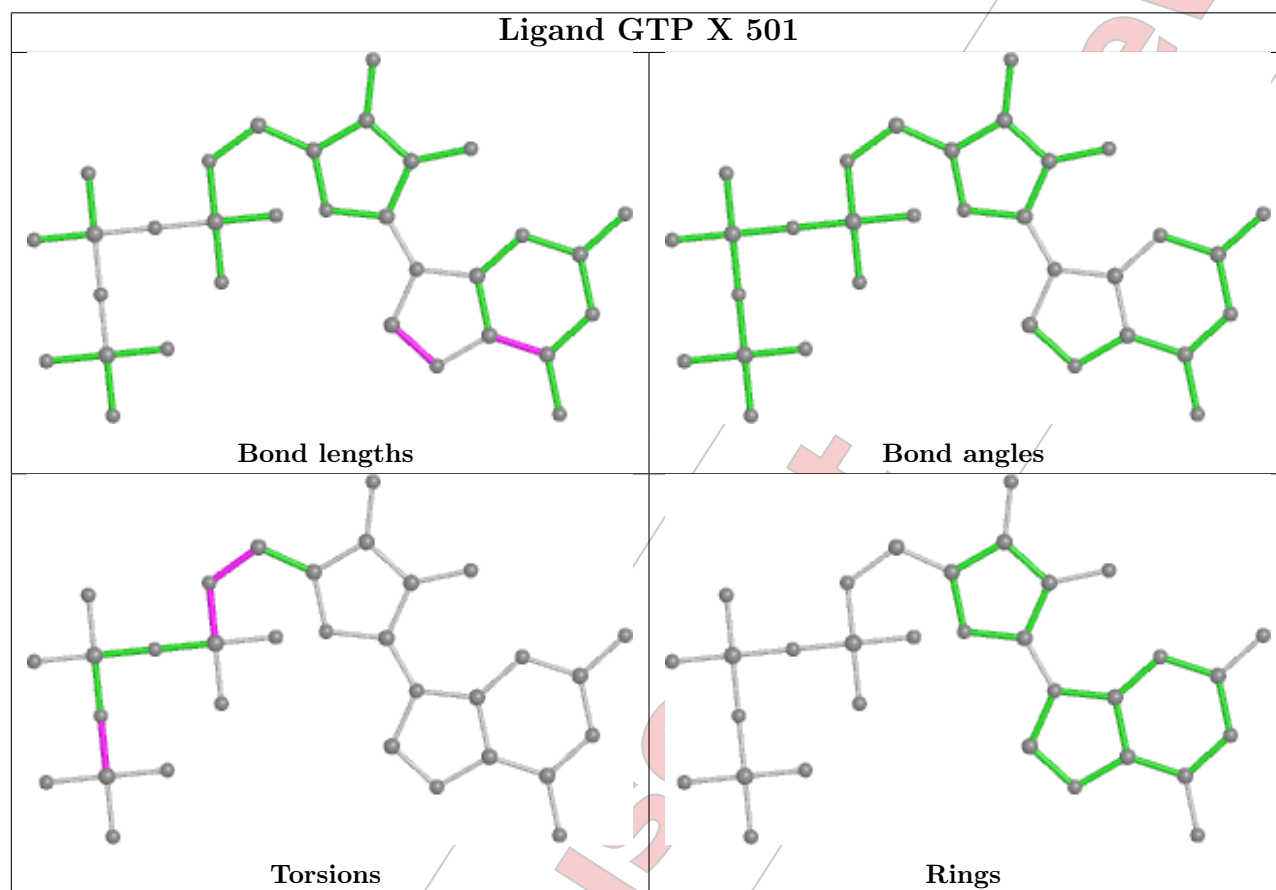

## 5.7 Other polymers [i](#)

There are no such residues in this entry.

## 5.8 Polymer linkage issues [i](#)

The following chains have linkage breaks:

| Mol | Chain | Number of breaks |
|-----|-------|------------------|
| 2   | B     | 3                |

All chain breaks are listed below:

| Model | Chain | Residue-1  | Atom-1 | Residue-2 | Atom-2 | Distance (Å) |
|-------|-------|------------|--------|-----------|--------|--------------|
| 1     | B     | 42:LEU     | C      | 45:GLN    | N      | 3.44         |
| 1     | B     | 431[A]:GLU | C      | 432:TYR   | N      | 1.12         |
| 1     | B     | 431[B]:GLU | C      | 432:TYR   | N      | 1.12         |

## 6 Fit of model and data i

### 6.1 Protein, DNA and RNA chains i

In the following table, the column labelled '#RSRZ > 2' contains the number (and percentage) of RSRZ outliers, followed by percent RSRZ outliers for the chain as percentile scores relative to all X-ray entries and entries of similar resolution. The OWAB column contains the minimum, median, 95<sup>th</sup> percentile and maximum values of the occupancy-weighted average B-factor per residue. The column labelled 'Q < 0.9' lists the number of (and percentage) of residues with an average occupancy less than 0.9.

| Mol | Chain | Analysed         | <RSRZ> | #RSRZ>2       | OWAB(Å <sup>2</sup> ) | Q<0.9 |
|-----|-------|------------------|--------|---------------|-----------------------|-------|
| 1   | A     | 435/435 (100%)   | -0.28  | 15 (3%) 45 44 | 10, 22, 51, 87        | 0     |
| 2   | B     | 430/430 (100%)   | 0.36   | 44 (10%) 6 6  | 15, 37, 74, 120       | 0     |
| 3   | F     | 155/155 (100%)   | -0.34  | 2 (1%) 77 76  | 15, 23, 46, 62        | 0     |
| All | All   | 1020/1020 (100%) | -0.02  | 61 (5%) 21 20 | 10, 27, 64, 120       | 0     |

All (61) RSRZ outliers are listed below:

| Mol | Chain | Res | Type | RSRZ |
|-----|-------|-----|------|------|
| 2   | B     | 281 | GLN  | 8.8  |
| 1   | A     | 337 | THR  | 8.2  |
| 2   | B     | 285 | ALA  | 7.7  |
| 2   | B     | 280 | SER  | 6.9  |
| 2   | B     | 247 | GLN  | 6.6  |
| 2   | B     | 283 | TYR  | 5.8  |
| 2   | B     | 37  | HIS  | 5.7  |
| 2   | B     | 38  | GLY  | 5.4  |
| 2   | B     | 279 | GLY  | 5.4  |
| 2   | B     | 57  | THR  | 5.4  |
| 2   | B     | 282 | GLN  | 5.3  |
| 2   | B     | 41  | ASP  | 5.2  |
| 2   | B     | 56  | ALA  | 5.1  |
| 2   | B     | 333 | LEU  | 4.9  |
| 2   | B     | 39  | ASP  | 4.4  |
| 2   | B     | 441 | ASP  | 4.0  |
| 1   | A     | 41  | THR  | 3.9  |
| 1   | A     | 46  | ASP  | 3.9  |
| 2   | B     | 284 | ARG  | 3.8  |
| 1   | A     | 40  | LYS  | 3.8  |
| 1   | A     | 348 | PRO  | 3.7  |
| 2   | B     | 88  | ARG  | 3.5  |
| 2   | B     | 337 | ASN  | 3.4  |

*Continued on next page...*

Continued from previous page...

| Mol | Chain | Res | Type | RSRZ |
|-----|-------|-----|------|------|
| 1   | A     | 338 | LYS  | 3.4  |
| 2   | B     | 406 | HIS  | 3.3  |
| 2   | B     | 33  | THR  | 3.2  |
| 1   | A     | 345 | ASP  | 3.2  |
| 2   | B     | 322 | ARG  | 3.0  |
| 2   | B     | 42  | LEU  | 3.0  |
| 2   | B     | 59  | ASN  | 3.0  |
| 2   | B     | 286 | LEU  | 3.0  |
| 2   | B     | 326 | LYS  | 2.9  |
| 3   | F     | 31  | ARG  | 2.9  |
| 3   | F     | 167 | LYS  | 2.9  |
| 1   | A     | 220 | GLU  | 2.9  |
| 2   | B     | 220 | THR  | 2.8  |
| 1   | A     | 349 | THR  | 2.8  |
| 2   | B     | 278 | ARG  | 2.8  |
| 1   | A     | 84  | ARG  | 2.7  |
| 1   | A     | 347 | CYS  | 2.6  |
| 2   | B     | 324 | SER  | 2.6  |
| 2   | B     | 58  | GLY  | 2.6  |
| 1   | A     | 284 | GLU  | 2.6  |
| 2   | B     | 113 | GLU  | 2.5  |
| 2   | B     | 249 | ASN  | 2.5  |
| 2   | B     | 293 | GLN  | 2.4  |
| 2   | B     | 97  | SER  | 2.4  |
| 2   | B     | 50  | ASN  | 2.4  |
| 2   | B     | 359 | PRO  | 2.3  |
| 1   | A     | 309 | HIS  | 2.3  |
| 2   | B     | 90  | ASP  | 2.3  |
| 2   | B     | 334 | ASN  | 2.2  |
| 2   | B     | 60  | LYS  | 2.2  |
| 1   | A     | 333 | ALA  | 2.2  |
| 2   | B     | 55  | GLU  | 2.2  |
| 2   | B     | 47  | GLU  | 2.2  |
| 2   | B     | 127 | GLU  | 2.1  |
| 1   | A     | 81  | GLY  | 2.1  |
| 2   | B     | 221 | THR  | 2.1  |
| 2   | B     | 372 | LYS  | 2.0  |
| 2   | B     | 340 | SER  | 2.0  |

## 6.2 Non-standard residues in protein, DNA, RNA chains [i](#)

There are no non-standard protein/DNA/RNA residues in this entry.

### 6.3 Carbohydrates [i](#)

There are no monosaccharides in this entry.

### 6.4 Ligands [i](#)

In the following table, the Atoms column lists the number of modelled atoms in the group and the number defined in the chemical component dictionary. The B-factors column lists the minimum, median, 95<sup>th</sup> percentile and maximum values of B factors of atoms in the group. The column labelled 'Q< 0.9' lists the number of atoms with occupancy less than 0.9.

| Mol | Type | Chain | Res | Atoms | RSCC | RSR  | B-factors(Å <sup>2</sup> ) | Q<0.9 |
|-----|------|-------|-----|-------|------|------|----------------------------|-------|
| 5   | MG   | X     | 502 | 1/?   | 0.93 | 0.10 | 10,10,10,10                | 0     |
| 6   | GDP  | X     | 503 | 28/?  | 0.93 | 0.12 | 12,24,33,34                | 0     |
| 7   | GAO  | X     | 604 | 26/?  | 0.93 | 0.12 | 27,46,72,87                | 0     |
| 8   | CA   | X     | 605 | 1/?   | 0.96 | 0.04 | 39,39,39,39                | 0     |
| 4   | GTP  | X     | 501 | 32/?  | 0.97 | 0.09 | 8,13,15,18                 | 0     |

The following is a graphical depiction of the model fit to experimental electron density of all instances of the Ligand of Interest. In addition, ligands with molecular weight > 250 and outliers as shown on the geometry validation Tables will also be included. Each fit is shown from different orientation to approximate a three-dimensional view.

**Electron density around GDP X 503:**

$2mF_o-DF_c$  (at 0.7 rmsd) in gray  
 $mF_o-DF_c$  (at 3 rmsd) in purple (negative)  
and green (positive)

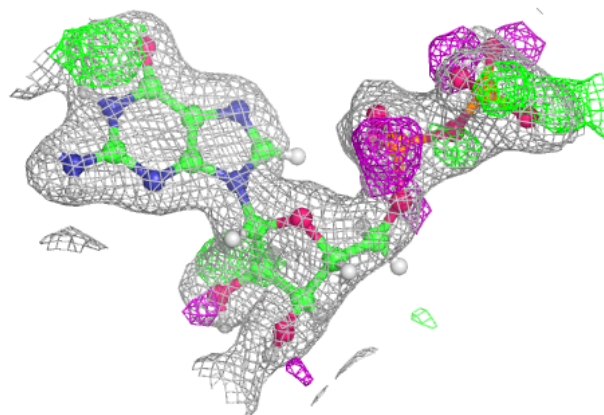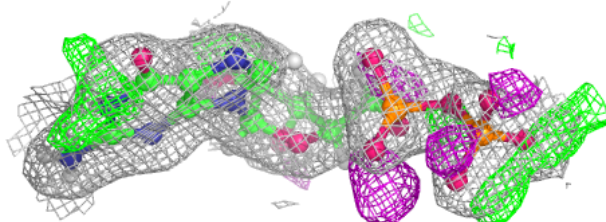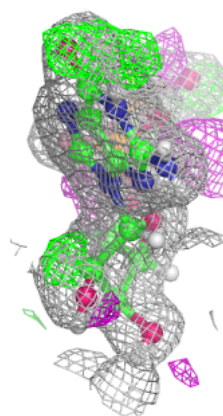

**Electron density around GAO X 604:**

$2mF_o-DF_c$  (at 0.7 rmsd) in gray  
 $mF_o-DF_c$  (at 3 rmsd) in purple (negative)  
and green (positive)

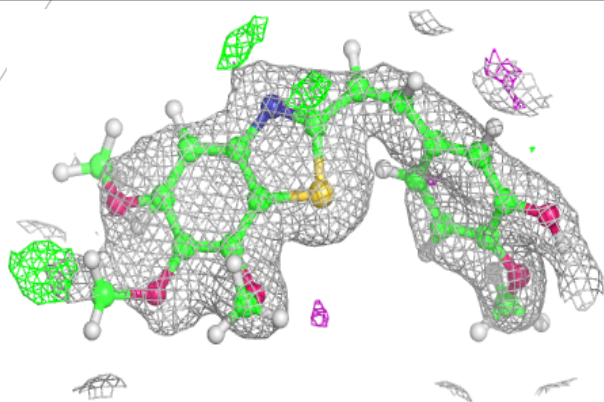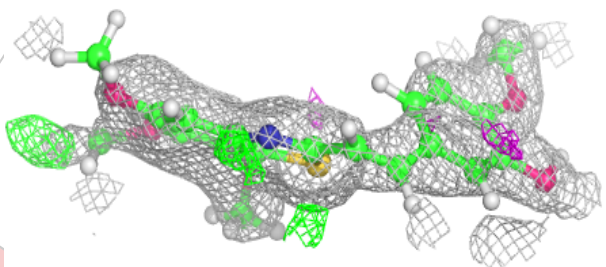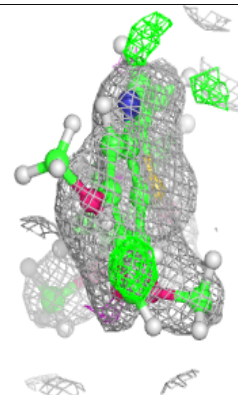

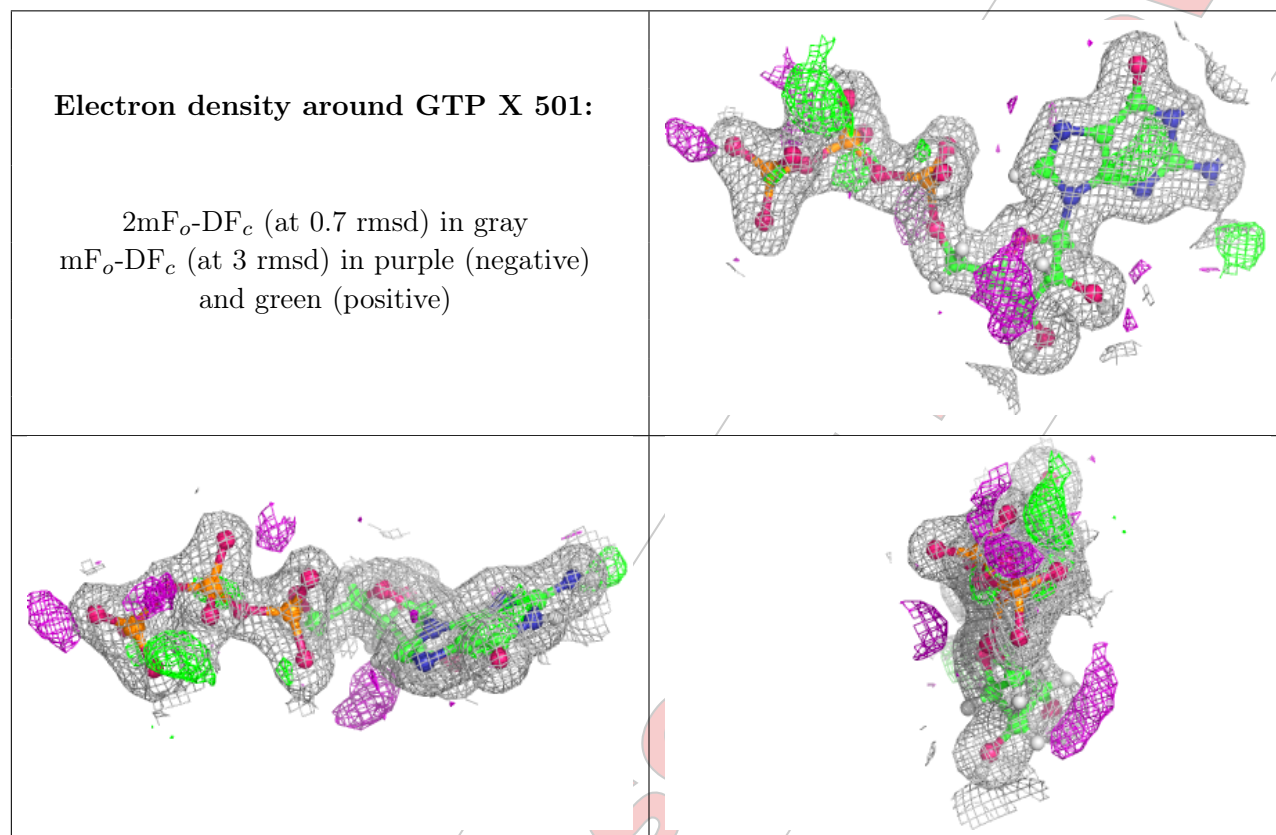

## 6.5 Other polymers [i](#)

There are no such residues in this entry.

Not For Manuscript



# Preliminary Full wwPDB X-ray Structure Validation Report ⓘ

Feb 10, 2023 – 08:12 am GMT

Deposition ID : D\_1292128590

**This wwPDB validation report is NOT for manuscript review**

This is a Preliminary Full wwPDB X-ray Structure Validation Report.

This report is produced by the wwPDB Deposition System during initial deposition but before annotation of the structure.

We welcome your comments at [validation@mail.wwpdb.org](mailto:validation@mail.wwpdb.org)

A user guide is available at

<https://www.wwpdb.org/validation/2017/XrayValidationReportHelp>

with specific help available everywhere you see the ⓘ symbol.

The types of validation reports are described at

<http://www.wwpdb.org/validation/2017/FAQs#types>.

---

The following versions of software and data (see [references ⓘ](#)) were used in the production of this report:

|                                |   |                                                                    |
|--------------------------------|---|--------------------------------------------------------------------|
| MolProbity                     | : | 4.02b-467                                                          |
| Mogul                          | : | 1.8.4, CSD as541be (2020)                                          |
| Xtriage (Phenix)               | : | 1.13                                                               |
| EDS                            | : | 2.32.1                                                             |
| buster-report                  | : | 1.1.7 (2018)                                                       |
| Percentile statistics          | : | 20191225.v01 (using entries in the PDB archive December 25th 2019) |
| Refmac                         | : | 5.8.0158                                                           |
| CCP4                           | : | 7.0.044 (Gargrove)                                                 |
| Ideal geometry (proteins)      | : | Engh & Huber (2001)                                                |
| Ideal geometry (DNA, RNA)      | : | Parkinson et al. (1996)                                            |
| Validation Pipeline (wwPDB-VP) | : | 2.32.1                                                             |

# 1 Overall quality at a glance i

The following experimental techniques were used to determine the structure:

*X-RAY DIFFRACTION*

The reported resolution of this entry is 3.00 Å.

Percentile scores (ranging between 0-100) for global validation metrics of the entry are shown in the following graphic. The table shows the number of entries on which the scores are based.

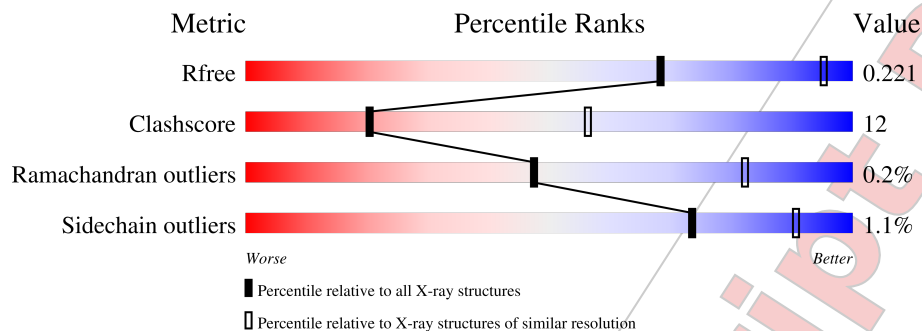

| Metric                | Whole archive<br>(#Entries) | Similar resolution<br>(#Entries, resolution range(Å)) |
|-----------------------|-----------------------------|-------------------------------------------------------|
| $R_{free}$            | 130704                      | 2092 (3.00-3.00)                                      |
| Clashscore            | 141614                      | 2416 (3.00-3.00)                                      |
| Ramachandran outliers | 138981                      | 2333 (3.00-3.00)                                      |
| Sidechain outliers    | 138945                      | 2336 (3.00-3.00)                                      |

The table below summarises the geometric issues observed across the polymeric chains and their fit to the electron density. The red, orange, yellow and green segments of the lower bar indicate the fraction of residues that contain outliers for  $\geq 3$ , 2, 1 and 0 types of geometric quality criteria respectively. A grey segment represents the fraction of residues that are not modelled. The numeric value for each fraction is indicated below the corresponding segment, with a dot representing fractions  $\leq 5\%$ .

| Mol | Chain | Length | Quality of chain |
|-----|-------|--------|------------------|
| 1   | A     | 439    | 72% 27%          |
| 2   | B     | 423    | 77% 23%          |
| 3   | C     | 440    | 77% 22%          |
| 4   | D     | 421    | 69% 31%          |
| 5   | E     | 121    | 79% 21% .        |
| 6   | F     | 320    | 70% 28% .        |

## 2 Entry composition [i](#)

There are 13 unique types of molecules in this entry. The entry contains 34647 atoms, of which 17104 are hydrogens and 0 are deuteriums.

In the tables below, the ZeroOcc column contains the number of atoms modelled with zero occupancy, the AltConf column contains the number of residues with at least one atom in alternate conformation and the Trace column contains the number of residues modelled with at most 2 atoms.

- Molecule 1 is a protein.

| Mol | Chain | Residues | Atoms |      |      |     |     | ZeroOcc | AltConf | Trace |   |
|-----|-------|----------|-------|------|------|-----|-----|---------|---------|-------|---|
|     |       |          | Total | C    | H    | N   | O   |         |         |       | S |
| 1   | A     | 439      | 6913  | 2214 | 3431 | 582 | 661 | 25      | 0       | 13    | 0 |

- Molecule 2 is a protein.

| Mol | Chain | Residues | Atoms |      |      |     |     | ZeroOcc | AltConf | Trace |   |
|-----|-------|----------|-------|------|------|-----|-----|---------|---------|-------|---|
|     |       |          | Total | C    | H    | N   | O   |         |         |       | S |
| 2   | B     | 423      | 6646  | 2126 | 3271 | 569 | 653 | 27      | 1       | 9     | 0 |

- Molecule 3 is a protein.

| Mol | Chain | Residues | Atoms |      |      |     |     | ZeroOcc | AltConf | Trace |   |
|-----|-------|----------|-------|------|------|-----|-----|---------|---------|-------|---|
|     |       |          | Total | C    | H    | N   | O   |         |         |       | S |
| 3   | C     | 440      | 6893  | 2205 | 3412 | 587 | 665 | 24      | 0       | 10    | 0 |

- Molecule 4 is a protein.

| Mol | Chain | Residues | Atoms |      |      |     |     | ZeroOcc | AltConf | Trace |   |
|-----|-------|----------|-------|------|------|-----|-----|---------|---------|-------|---|
|     |       |          | Total | C    | H    | N   | O   |         |         |       | S |
| 4   | D     | 421      | 6533  | 2091 | 3211 | 561 | 642 | 28      | 5       | 4     | 0 |

- Molecule 5 is a protein.

| Mol | Chain | Residues | Atoms |     |      |     |     | ZeroOcc | AltConf | Trace |   |
|-----|-------|----------|-------|-----|------|-----|-----|---------|---------|-------|---|
|     |       |          | Total | C   | H    | N   | O   |         |         |       | S |
| 5   | E     | 121      | 2032  | 621 | 1026 | 182 | 198 | 5       | 0       | 1     | 0 |

- Molecule 6 is a protein.

| Mol | Chain | Residues | Atoms |      |      |     |     | ZeroOcc | AltConf | Trace |   |
|-----|-------|----------|-------|------|------|-----|-----|---------|---------|-------|---|
|     |       |          | Total | C    | H    | N   | O   |         |         |       | S |
| 6   | F     | 320      | 5281  | 1711 | 2641 | 437 | 478 | 14      | 13      | 5     | 0 |

- Molecule 7 is GUANOSINE-5'-TRIPHOSPHATE (three-letter code: GTP) (formula: C<sub>10</sub>H<sub>16</sub>N<sub>5</sub>O<sub>14</sub>P<sub>3</sub>).

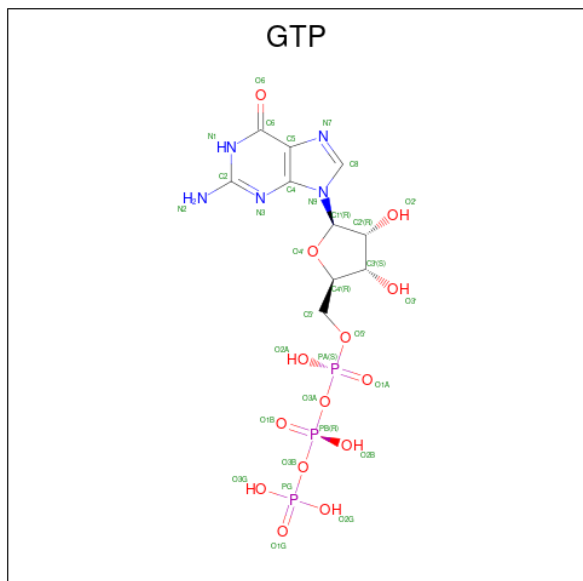

| Mol | Chain | Residues | Atoms |    |    |   |    | ZeroOcc | AltConf |   |
|-----|-------|----------|-------|----|----|---|----|---------|---------|---|
| 7   | X     | 1        | Total | C  | H  | N | O  | P       | 0       | 0 |
|     |       |          | 44    | 10 | 12 | 5 | 14 | 3       |         |   |
| 7   | X     | 1        | Total | C  | H  | N | O  | P       | 0       | 0 |
|     |       |          | 44    | 10 | 12 | 5 | 14 | 3       |         |   |

- Molecule 8 is MAGNESIUM ION (three-letter code: MG) (formula: Mg).

| Mol | Chain | Residues | Atoms |    | ZeroOcc | AltConf |
|-----|-------|----------|-------|----|---------|---------|
| 8   | X     | 1        | Total | Mg | 0       | 0       |
|     |       |          | 1     | 1  |         |         |
| 8   | X     | 1        | Total | Mg | 0       | 0       |
|     |       |          | 1     | 1  |         |         |
| 8   | X     | 1        | Total | Mg | 0       | 0       |
|     |       |          | 1     | 1  |         |         |
| 8   | X     | 1        | Total | Mg | 0       | 0       |
|     |       |          | 1     | 1  |         |         |

- Molecule 9 is CALCIUM ION (three-letter code: CA) (formula: Ca).

| Mol | Chain | Residues | Atoms |    | ZeroOcc | AltConf |
|-----|-------|----------|-------|----|---------|---------|
| 9   | X     | 1        | Total | Ca | 0       | 0       |
|     |       |          | 1     | 1  |         |         |
| 9   | X     | 1        | Total | Ca | 0       | 0       |
|     |       |          | 1     | 1  |         |         |

- Molecule 10 is GUANOSINE-5'-DIPHOSPHATE (three-letter code: GDP) (formula:  $C_{10}H_{15}N_5O_{11}P_2$ ).

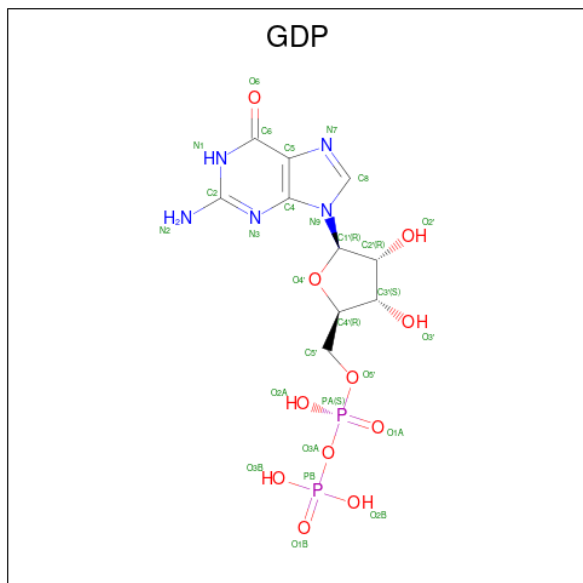

| Mol | Chain | Residues | Atoms |    |    |   |    | ZeroOcc | AltConf |   |
|-----|-------|----------|-------|----|----|---|----|---------|---------|---|
|     |       |          | Total | C  | H  | N | O  |         |         | P |
| 10  | X     | 1        | Total | C  | H  | N | O  | P       | 0       | 0 |
|     |       |          | 40    | 10 | 12 | 5 | 11 | 2       |         |   |
| 10  | X     | 1        | Total | C  | H  | N | O  | P       | 0       | 0 |
|     |       |          | 40    | 10 | 12 | 5 | 11 | 2       |         |   |

- Molecule 11 is a ligand with the chemical component id COL but its atom names do not match the existing wwPDB Chemical Component Dictionary definition for COL. Consequently no firm identification of ligand chemistry can be made. Once the structure is annotated then an identification and diagram will be given here.

| Mol | Chain | Residues | Atoms |    |    |   | ZeroOcc | AltConf |   |
|-----|-------|----------|-------|----|----|---|---------|---------|---|
|     |       |          | Total | C  | H  | N |         |         | O |
| 11  | X     | 1        | Total | C  | H  | N | O       | 0       | 0 |
|     |       |          | 54    | 22 | 25 | 1 | 6       |         |   |
| 11  | X     | 1        | Total | C  | H  | N | O       | 0       | 0 |
|     |       |          | 54    | 22 | 25 | 1 | 6       |         |   |

- Molecule 12 is PHOSPHOMETHYLPHOSPHONIC ACID ADENYLATE ESTER (three-letter code: ACP) (formula:  $C_{11}H_{18}N_5O_{12}P_3$ ).

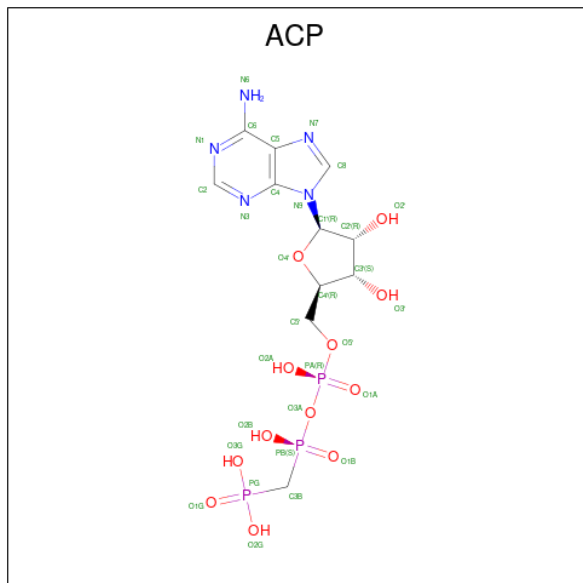

| Mol | Chain | Residues | Atoms |    |    |   |    | ZeroOcc | AltConf |   |
|-----|-------|----------|-------|----|----|---|----|---------|---------|---|
|     |       |          | Total | C  | H  | N | O  |         |         | P |
| 12  | X     | 1        | 45    | 11 | 14 | 5 | 12 | 3       | 0       | 0 |

- Molecule 13 is water.

| Mol | Chain | Residues | Atoms |    | ZeroOcc | AltConf |
|-----|-------|----------|-------|----|---------|---------|
| 13  | S     | 22       | Total | O  | 0       | 0       |
|     |       |          | 22    | 22 |         |         |

### 3 Residue-property plots

These plots are drawn for all protein, RNA, DNA and oligosaccharide chains in the entry. The first graphic for a chain summarises the proportions of the various outlier classes displayed in the second graphic. The second graphic shows the sequence view annotated by issues in geometry. Residues are color-coded according to the number of geometric quality criteria for which they contain at least one outlier: green = 0, yellow = 1, orange = 2 and red = 3 or more. Stretches of 2 or more consecutive residues without any outlier are shown as a green connector. Residues present in the sample, but not in the model, are shown in grey.

- Molecule 1:

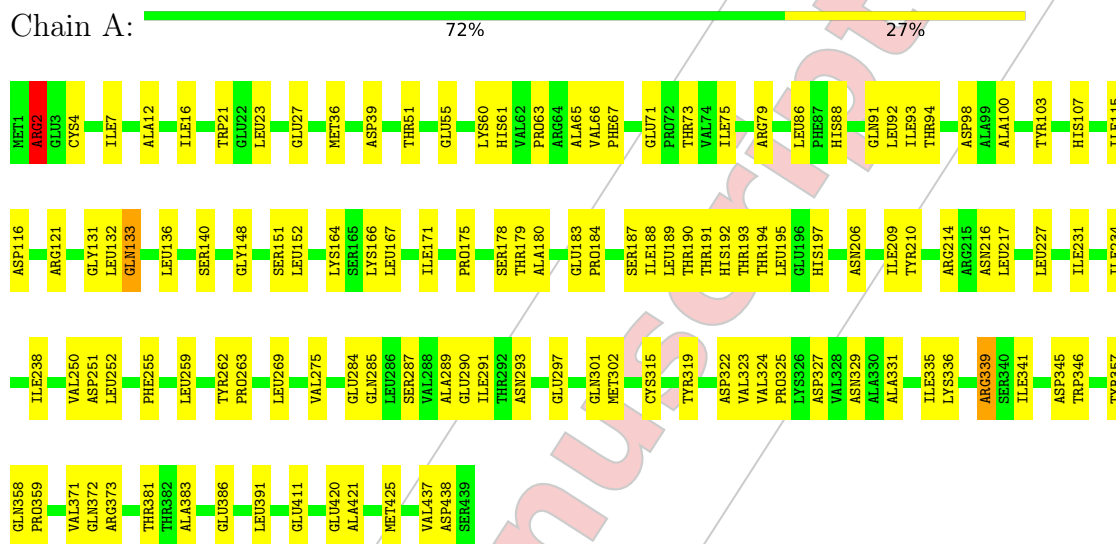

- Molecule 2:

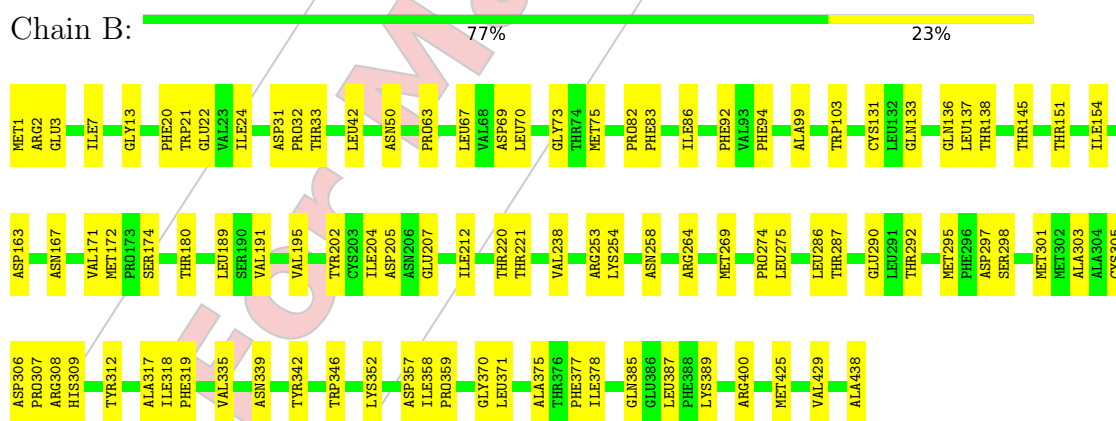

- Molecule 3:

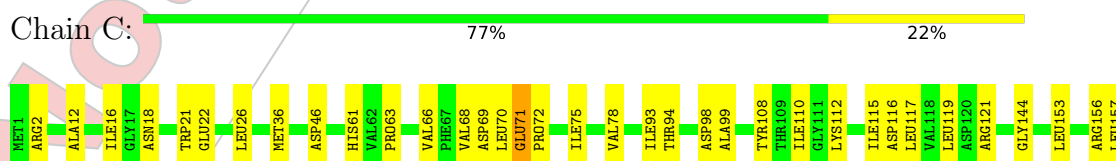

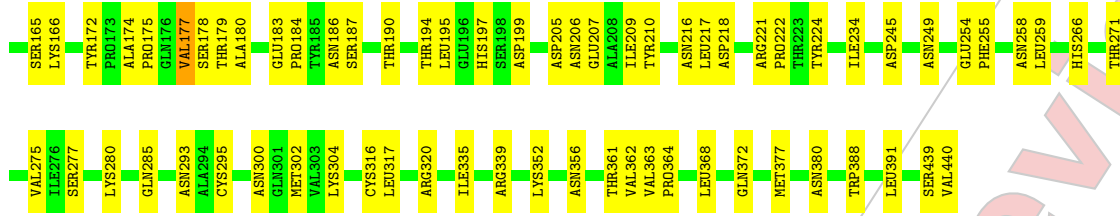

• Molecule 4:

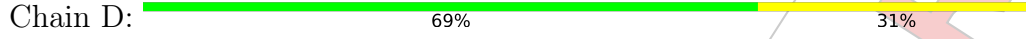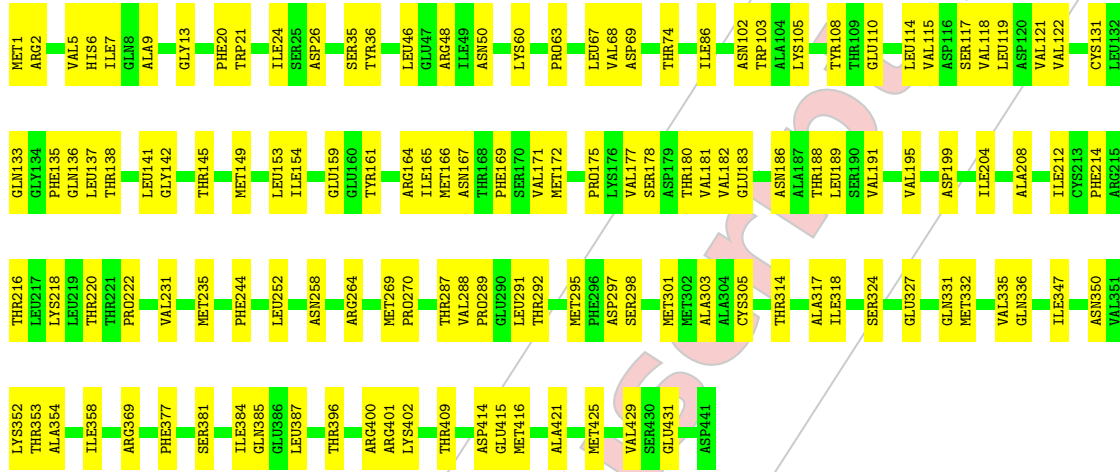

• Molecule 5:

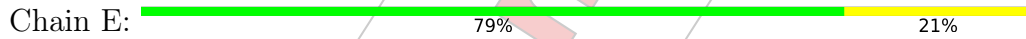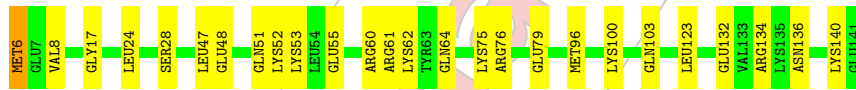

• Molecule 6:

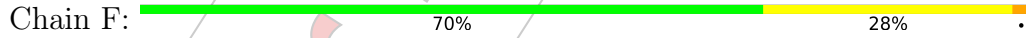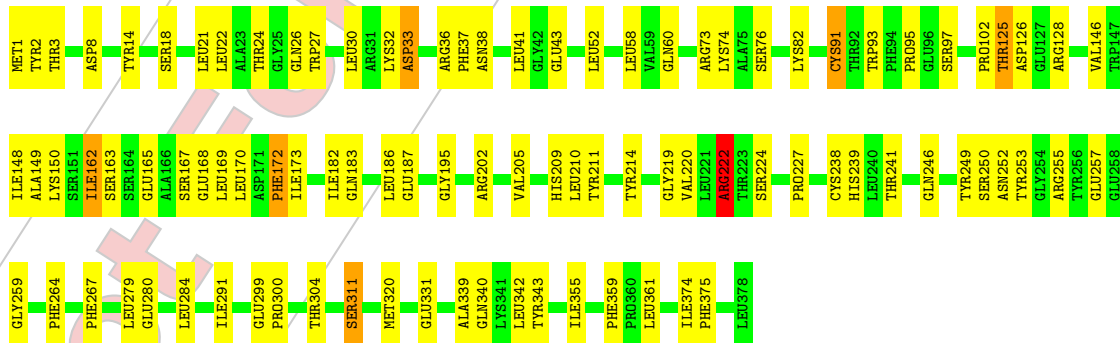

## 4 Data and refinement statistics i

| Property                                                                | Value                                                       | Source           |
|-------------------------------------------------------------------------|-------------------------------------------------------------|------------------|
| Space group                                                             | P 21 21 21                                                  | Depositor        |
| Cell constants<br>a, b, c, $\alpha$ , $\beta$ , $\gamma$                | 106.71Å 160.61Å 180.73Å<br>90.00° 90.00° 90.00°             | Depositor        |
| Resolution (Å)                                                          | 15.18 – 3.00<br>15.22 – 2.20                                | Depositor<br>EDS |
| % Data completeness<br>(in resolution range)                            | 99.8 (15.18-3.00)<br>69.5 (15.22-2.20)                      | Depositor<br>EDS |
| $R_{merge}$                                                             | (Not available)                                             | Depositor        |
| $R_{sym}$                                                               | (Not available)                                             | Depositor        |
| $\langle I/\sigma(I) \rangle$ <sup>1</sup>                              | 0.86 (at 2.20Å)                                             | Xtrriage         |
| Refinement program                                                      | .                                                           | Depositor        |
| R, $R_{free}$                                                           | 0.163 , 0.214<br>0.176 , 0.221                              | Depositor<br>DCC |
| $R_{free}$ test set                                                     | 2000 reflections (1.83%)                                    | wwPDB-VP         |
| Wilson B-factor (Å <sup>2</sup> )                                       | 67.3                                                        | Xtrriage         |
| Anisotropy                                                              | 0.031                                                       | Xtrriage         |
| Bulk solvent $k_{sol}$ (e/Å <sup>3</sup> ), $B_{sol}$ (Å <sup>2</sup> ) | 0.44 , 73.2                                                 | EDS              |
| L-test for twinning <sup>2</sup>                                        | $\langle  L  \rangle = 0.50$ , $\langle L^2 \rangle = 0.33$ | Xtrriage         |
| Estimated twinning fraction                                             | No twinning to report.                                      | Xtrriage         |
| $F_o, F_c$ correlation                                                  | 0.95                                                        | EDS              |
| Total number of atoms                                                   | 34647                                                       | wwPDB-VP         |
| Average B, all atoms (Å <sup>2</sup> )                                  | 70.0                                                        | wwPDB-VP         |

Xtrriage's analysis on translational NCS is as follows: *The largest off-origin peak in the Patterson function is 2.53% of the height of the origin peak. No significant pseudotranslation is detected.*

<sup>1</sup>Intensities estimated from amplitudes.

<sup>2</sup>Theoretical values of  $\langle |L| \rangle$ ,  $\langle L^2 \rangle$  for acentric reflections are 0.5, 0.333 respectively for untwinned datasets, and 0.375, 0.2 for perfectly twinned datasets.

## 5 Model quality [i](#)

### 5.1 Standard geometry [i](#)

Bond lengths and bond angles in the following residue types are not validated in this section: MG, ACP, COL, GDP, CA, GTP

The Z score for a bond length (or angle) is the number of standard deviations the observed value is removed from the expected value. A bond length (or angle) with  $|Z| > 5$  is considered an outlier worth inspection. RMSZ is the root-mean-square of all Z scores of the bond lengths (or angles).

| Mol | Chain | Bond lengths |         | Bond angles |         |
|-----|-------|--------------|---------|-------------|---------|
|     |       | RMSZ         | # Z  >5 | RMSZ        | # Z  >5 |
| 1   | A     | 0.39         | 0/3599  | 0.54        | 0/4888  |
| 2   | B     | 0.41         | 0/3473  | 0.57        | 0/4704  |
| 3   | C     | 0.44         | 0/3589  | 0.56        | 0/4874  |
| 4   | D     | 0.36         | 0/3407  | 0.53        | 0/4618  |
| 5   | E     | 0.41         | 0/1017  | 0.51        | 0/1349  |
| 6   | F     | 0.36         | 0/2712  | 0.54        | 0/3663  |
| All | All   | 0.39         | 0/17797 | 0.55        | 0/24096 |

Chiral center outliers are detected by calculating the chiral volume of a chiral center and verifying if the center is modelled as a planar moiety or with the opposite hand. A planarity outlier is detected by checking planarity of atoms in a peptide group, atoms in a mainchain group or atoms of a sidechain that are expected to be planar.

| Mol | Chain | #Chirality outliers | #Planarity outliers |
|-----|-------|---------------------|---------------------|
| 1   | A     | 0                   | 2                   |
| 2   | B     | 0                   | 1                   |
| 3   | C     | 0                   | 3                   |
| 4   | D     | 0                   | 1                   |
| 6   | F     | 0                   | 1                   |
| All | All   | 0                   | 8                   |

There are no bond length outliers.

There are no bond angle outliers.

There are no chirality outliers.

All (8) planarity outliers are listed below:

| Mol | Chain | Res | Type | Group     |
|-----|-------|-----|------|-----------|
| 1   | A     | 2   | ARG  | Sidechain |
| 1   | A     | 339 | ARG  | Sidechain |

*Continued on next page...*

Continued from previous page...

| Mol | Chain | Res | Type | Group     |
|-----|-------|-----|------|-----------|
| 2   | B     | 264 | ARG  | Sidechain |
| 3   | C     | 2   | ARG  | Sidechain |
| 3   | C     | 221 | ARG  | Sidechain |
| 3   | C     | 339 | ARG  | Sidechain |
| 4   | D     | 401 | ARG  | Sidechain |
| 6   | F     | 222 | ARG  | Sidechain |

## 5.2 Too-close contacts [i](#)

In the following table, the Non-H and H(model) columns list the number of non-hydrogen atoms and hydrogen atoms in the chain respectively. The H(added) column lists the number of hydrogen atoms added and optimized by MolProbity. The Clashes column lists the number of clashes within the asymmetric unit, whereas Symm-Clashes lists symmetry-related clashes.

| Mol | Chain | Non-H | H(model) | H(added) | Clashes | Symm-Clashes |
|-----|-------|-------|----------|----------|---------|--------------|
| 1   | A     | 3482  | 3431     | 3430     | 99      | 0            |
| 2   | B     | 3375  | 3271     | 3268     | 87      | 0            |
| 3   | C     | 3481  | 3412     | 3409     | 68      | 0            |
| 4   | D     | 3322  | 3211     | 3210     | 103     | 0            |
| 5   | E     | 1006  | 1026     | 1026     | 20      | 0            |
| 6   | F     | 2640  | 2641     | 2641     | 68      | 0            |
| 7   | X     | 64    | 24       | 24       | 0       | 0            |
| 8   | X     | 4     | 0        | 0        | 0       | 0            |
| 9   | X     | 2     | 0        | 0        | 0       | 0            |
| 10  | X     | 56    | 24       | 24       | 2       | 0            |
| 11  | X     | 58    | 50       | 0        | 5       | 0            |
| 12  | X     | 31    | 14       | 14       | 1       | 0            |
| 13  | S     | 22    | 0        | 0        | 0       | 0            |
| All | All   | 17543 | 17104    | 17046    | 428     | 0            |

The all-atom clashscore is defined as the number of clashes found per 1000 atoms (including hydrogen atoms). The all-atom clashscore for this structure is 12.

All (428) close contacts within the same asymmetric unit are listed below, sorted by their clash magnitude.

| Atom-1           | Atom-2           | Interatomic distance (Å) | Clash overlap (Å) |
|------------------|------------------|--------------------------|-------------------|
| 6:F:128:ARG:HE   | 6:F:170:LEU:HD22 | 1.37                     | 0.88              |
| 1:A:381:THR:HG22 | 1:A:383:ALA:H    | 1.41                     | 0.86              |
| 4:D:118:VAL:HG21 | 4:D:153:LEU:HD21 | 1.56                     | 0.84              |
| 4:D:175:PRO:HA   | 4:D:178:SER:HB2  | 1.56                     | 0.83              |

Continued on next page...

*Continued from previous page...*

| Atom-1           | Atom-2              | Interatomic distance (Å) | Clash overlap (Å) |
|------------------|---------------------|--------------------------|-------------------|
| 6:F:125:THR:HG22 | 6:F:126:ASP:HA      | 1.61                     | 0.82              |
| 6:F:149:ALA:HB2  | 6:F:182:ILE:HG12    | 1.63                     | 0.81              |
| 2:B:1:MET:N      | 2:B:131:CYS:HB3     | 1.96                     | 0.80              |
| 1:A:166:LYS:HE2  | 1:A:197:HIS:O       | 1.84                     | 0.78              |
| 3:C:75:ILE:HD12  | 3:C:94:THR:HG22     | 1.66                     | 0.78              |
| 1:A:2:ARG:NH2    | 1:A:250[A]:VAL:HG13 | 2.00                     | 0.77              |
| 1:A:357:TYR:CE2  | 5:E:17:GLY:HA2      | 2.21                     | 0.76              |
| 2:B:75:MET:CE    | 2:B:94:PHE:HB3      | 2.15                     | 0.76              |
| 2:B:136:GLN:HA   | 2:B:167:ASN:O       | 1.86                     | 0.76              |
| 6:F:339:ALA:HB3  | 6:F:342:LEU:HD13    | 1.68                     | 0.76              |
| 2:B:1:MET:H2     | 2:B:131:CYS:HB3     | 1.51                     | 0.76              |
| 4:D:352:LYS:HG3  | 11:X:511:COL:C4     | 2.16                     | 0.75              |
| 3:C:177:VAL:HG21 | 3:C:206:ASN:HB3     | 1.69                     | 0.74              |
| 1:A:2:ARG:HH21   | 1:A:250[A]:VAL:HG13 | 1.53                     | 0.74              |
| 1:A:75:ILE:HG23  | 1:A:92:LEU:HD12     | 1.69                     | 0.73              |
| 6:F:202:ARG:HB3  | 6:F:220:VAL:HG12    | 1.71                     | 0.72              |
| 3:C:18:ASN:HD21  | 3:C:78:VAL:HG22     | 1.54                     | 0.72              |
| 1:A:67:PHE:HB2   | 1:A:92:LEU:HD13     | 1.71                     | 0.72              |
| 4:D:385:GLN:HB2  | 4:D:429:VAL:HG13    | 1.70                     | 0.72              |
| 3:C:119:LEU:HD11 | 3:C:156:ARG:HB3     | 1.71                     | 0.71              |
| 1:A:297:GLU:HG2  | 1:A:339:ARG:HH22    | 1.55                     | 0.71              |
| 2:B:83:PHE:O     | 2:B:86:ILE:HG22     | 1.90                     | 0.71              |
| 3:C:93:ILE:HD11  | 3:C:121:ARG:HG3     | 1.71                     | 0.70              |
| 4:D:142:GLY:HA3  | 10:X:509:GDP:H4'    | 1.74                     | 0.69              |
| 3:C:70:LEU:HD13  | 3:C:110:ILE:CG2     | 2.22                     | 0.69              |
| 5:E:48:GLU:HG2   | 5:E:52:LYS:HE3      | 1.75                     | 0.69              |
| 1:A:63:PRO:CG    | 1:A:86:LEU:HD21     | 2.23                     | 0.68              |
| 1:A:329:ASN:HB3  | 5:E:6:MET:HE1       | 1.75                     | 0.68              |
| 1:A:93:ILE:HD11  | 1:A:121:ARG:HG3     | 1.74                     | 0.68              |
| 2:B:75:MET:HE3   | 2:B:94:PHE:HB3      | 1.76                     | 0.67              |
| 3:C:175:PRO:HA   | 3:C:179:THR:CG2     | 2.25                     | 0.67              |
| 4:D:63:PRO:HD3   | 4:D:86:ILE:HG12     | 1.75                     | 0.67              |
| 6:F:219:GLY:HA3  | 6:F:264:PHE:CZ      | 2.30                     | 0.67              |
| 6:F:320:MET:HE1  | 12:X:512:ACP:N3     | 2.09                     | 0.67              |
| 4:D:105:LYS:HD3  | 4:D:110:GLU:HG3     | 1.78                     | 0.66              |
| 4:D:191:VAL:HG11 | 4:D:425:MET:HE2     | 1.78                     | 0.66              |
| 1:A:4:CYS:SG     | 1:A:252:LEU:HD21    | 2.35                     | 0.66              |
| 1:A:371:VAL:HG12 | 1:A:373:ARG:H       | 1.61                     | 0.66              |
| 2:B:75:MET:HE2   | 2:B:94:PHE:HB3      | 1.79                     | 0.65              |
| 1:A:21:TRP:CZ3   | 1:A:63:PRO:HB3      | 2.31                     | 0.64              |
| 4:D:171:VAL:HA   | 4:D:204:ILE:O       | 1.98                     | 0.64              |

*Continued on next page...*

Continued from previous page...

| Atom-1             | Atom-2             | Interatomic distance (Å) | Clash overlap (Å) |
|--------------------|--------------------|--------------------------|-------------------|
| 4:D:292:THR:HG22   | 4:D:335:VAL:HG21   | 1.78                     | 0.64              |
| 4:D:2:ARG:HB3      | 4:D:133:GLN:HE21   | 1.63                     | 0.63              |
| 4:D:214:PHE:O      | 4:D:218:LYS:HA     | 1.99                     | 0.63              |
| 4:D:103:TRP:CE3    | 4:D:189:LEU:HD13   | 2.34                     | 0.63              |
| 4:D:204:ILE:HD13   | 4:D:231:VAL:HG13   | 1.79                     | 0.63              |
| 6:F:128:ARG:NE     | 6:F:170:LEU:HD22   | 2.12                     | 0.63              |
| 3:C:175:PRO:HA     | 3:C:179:THR:HG21   | 1.81                     | 0.63              |
| 6:F:209:HIS:CD2    | 6:F:210:LEU:HG     | 2.35                     | 0.62              |
| 1:A:293:ASN:ND2    | 1:A:339:ARG:HH21   | 1.98                     | 0.62              |
| 6:F:246:GLN:O      | 6:F:253:TYR:HB2    | 1.98                     | 0.62              |
| 2:B:287:THR:HG22   | 2:B:290:GLU:CG     | 2.29                     | 0.62              |
| 3:C:216:ASN:HB3    | 3:C:275:VAL:O      | 2.00                     | 0.62              |
| 6:F:374:ILE:HD11   | 6:F:375:PHE:CE2    | 2.34                     | 0.62              |
| 1:A:357:TYR:CD2    | 5:E:17:GLY:HA2     | 2.34                     | 0.62              |
| 2:B:317:ALA:C      | 2:B:318:ILE:HD12   | 2.19                     | 0.62              |
| 2:B:287:THR:HG23   | 2:B:290:GLU:H      | 1.63                     | 0.61              |
| 4:D:118:VAL:CG2    | 4:D:153:LEU:HD21   | 2.29                     | 0.61              |
| 3:C:12:ALA:O       | 3:C:16:ILE:HG12    | 2.00                     | 0.61              |
| 4:D:269[B]:MET:CE  | 4:D:305:CYS:HB2    | 2.30                     | 0.61              |
| 4:D:269[B]:MET:HE1 | 4:D:305:CYS:HB2    | 1.83                     | 0.61              |
| 2:B:67:LEU:HD22    | 2:B:92:PHE:CE2     | 2.36                     | 0.60              |
| 4:D:141:LEU:HD12   | 4:D:172:MET:HE3    | 1.81                     | 0.60              |
| 1:A:63:PRO:HG2     | 1:A:86:LEU:HD21    | 1.83                     | 0.60              |
| 1:A:209[B]:ILE:CD1 | 1:A:231:ILE:HD11   | 2.32                     | 0.60              |
| 3:C:165:SER:HA     | 3:C:199:ASP:OD2    | 2.02                     | 0.60              |
| 1:A:285:GLN:HG3    | 1:A:372[B]:GLN:OE1 | 2.01                     | 0.60              |
| 2:B:274:PRO:HB3    | 2:B:286:LEU:HD12   | 1.84                     | 0.60              |
| 2:B:306:ASP:HB3    | 2:B:309:HIS:ND1    | 2.17                     | 0.60              |
| 2:B:191:VAL:O      | 2:B:195:VAL:HG23   | 2.02                     | 0.60              |
| 2:B:318:ILE:HD11   | 11:X:506:COL:C16   | 2.32                     | 0.60              |
| 6:F:91:CYS:SG      | 6:F:93:TRP:CD2     | 2.96                     | 0.59              |
| 6:F:165:GLU:HG2    | 6:F:167:SER:H      | 1.68                     | 0.59              |
| 6:F:14:TYR:HB3     | 6:F:41:LEU:HD13    | 1.85                     | 0.59              |
| 1:A:190:THR:O      | 1:A:194:THR:HG22   | 2.03                     | 0.58              |
| 3:C:180:ALA:HB1    | 4:D:258:ASN:OD1    | 2.03                     | 0.58              |
| 2:B:370:GLY:O      | 2:B:371:LEU:HD23   | 2.03                     | 0.58              |
| 1:A:324:VAL:HG23   | 1:A:327:ASP:H      | 1.68                     | 0.58              |
| 4:D:188:THR:HG22   | 4:D:421:ALA:HB1    | 1.86                     | 0.58              |
| 4:D:6:HIS:CD2      | 4:D:21:TRP:HE1     | 2.22                     | 0.58              |
| 6:F:148:ILE:HB     | 6:F:162:ILE:HG23   | 1.85                     | 0.58              |
| 4:D:396:THR:O      | 4:D:400:ARG:HB2    | 2.04                     | 0.57              |

Continued on next page...

Continued from previous page...

| Atom-1           | Atom-2              | Interatomic distance (Å) | Clash overlap (Å) |
|------------------|---------------------|--------------------------|-------------------|
| 2:B:400:ARG:HD2  | 3:C:439:SER:HB3     | 1.87                     | 0.57              |
| 3:C:166:LYS:HE2  | 3:C:197:HIS:O       | 2.04                     | 0.57              |
| 3:C:271:THR:HG23 | 3:C:300:ASN:O       | 2.04                     | 0.57              |
| 2:B:163:ASP:O    | 2:B:253:ARG:NH2     | 2.37                     | 0.57              |
| 1:A:322:ASP:O    | 1:A:373:ARG:NH1     | 2.36                     | 0.57              |
| 4:D:20:PHE:CZ    | 4:D:24:ILE:HD13     | 2.39                     | 0.57              |
| 3:C:440:VAL:HG12 | 3:C:440:VAL:O       | 2.05                     | 0.57              |
| 2:B:292:THR:HG22 | 2:B:319:PHE:CZ      | 2.40                     | 0.56              |
| 1:A:227:LEU:O    | 1:A:231:ILE:HG13    | 2.06                     | 0.56              |
| 4:D:318:ILE:HG13 | 4:D:354:ALA:HB3     | 1.87                     | 0.56              |
| 5:E:96:MET:O     | 5:E:100:LYS:HB2     | 2.06                     | 0.56              |
| 2:B:13:GLY:HA2   | 2:B:138[B]:THR:HG22 | 1.87                     | 0.56              |
| 4:D:358:ILE:O    | 4:D:358:ILE:HG13    | 2.04                     | 0.56              |
| 4:D:141:LEU:HD12 | 4:D:172:MET:CE      | 2.35                     | 0.56              |
| 3:C:75:ILE:HD12  | 3:C:94:THR:CG2      | 2.35                     | 0.56              |
| 1:A:7:ILE:HG23   | 1:A:66[B]:VAL:HG13  | 1.87                     | 0.56              |
| 4:D:180:THR:HG22 | 4:D:181:VAL:N       | 2.20                     | 0.56              |
| 4:D:220:THR:O    | 4:D:222:PRO:HD3     | 2.06                     | 0.56              |
| 6:F:202:ARG:HB3  | 6:F:220:VAL:CG1     | 2.36                     | 0.56              |
| 4:D:118:VAL:O    | 4:D:122:VAL:HG13    | 2.05                     | 0.56              |
| 2:B:308:ARG:HG2  | 2:B:342:TYR:CE2     | 2.41                     | 0.55              |
| 3:C:209:ILE:HD11 | 3:C:302:MET:SD      | 2.46                     | 0.55              |
| 4:D:244:PHE:CZ   | 4:D:358:ILE:HD11    | 2.40                     | 0.55              |
| 6:F:214:TYR:HB3  | 6:F:375:PHE:HB3     | 1.87                     | 0.55              |
| 2:B:174:SER:HB2  | 2:B:207:GLU:HB2     | 1.87                     | 0.55              |
| 2:B:1:MET:HE1    | 2:B:50[B]:ASN:HB2   | 1.88                     | 0.55              |
| 3:C:18:ASN:ND2   | 3:C:78:VAL:HG22     | 2.20                     | 0.55              |
| 1:A:100:ALA:HA   | 2:B:254:LYS:HG3     | 1.89                     | 0.55              |
| 1:A:325:PRO:O    | 1:A:329:ASN:ND2     | 2.40                     | 0.55              |
| 1:A:206:ASN:OD1  | 1:A:209[B]:ILE:HD11 | 2.07                     | 0.55              |
| 6:F:149:ALA:CB   | 6:F:182:ILE:HG12    | 2.35                     | 0.55              |
| 1:A:79:ARG:HH22  | 1:A:94:THR:HG21     | 1.71                     | 0.54              |
| 3:C:361:THR:HG22 | 3:C:362:VAL:N       | 2.22                     | 0.54              |
| 3:C:21:TRP:CZ3   | 3:C:63:PRO:HB3      | 2.42                     | 0.54              |
| 4:D:69:ASP:HA    | 4:D:145:THR:HG21    | 1.90                     | 0.54              |
| 1:A:88:HIS:N     | 1:A:91:GLN:OE1      | 2.36                     | 0.54              |
| 1:A:167:LEU:HD22 | 1:A:252:LEU:HD12    | 1.89                     | 0.54              |
| 5:E:60:ARG:O     | 5:E:64:GLN:HG3      | 2.08                     | 0.54              |
| 2:B:151:THR:HA   | 2:B:154:ILE:HD12    | 1.90                     | 0.54              |
| 5:E:51:GLN:O     | 5:E:55:GLU:HG3      | 2.08                     | 0.54              |
| 4:D:332:MET:O    | 4:D:336:GLN:HG3     | 2.07                     | 0.53              |

Continued on next page...

Continued from previous page...

| Atom-1            | Atom-2              | Interatomic distance (Å) | Clash overlap (Å) |
|-------------------|---------------------|--------------------------|-------------------|
| 2:B:22[A]:GLU:OE2 | 2:B:82:PRO:HG2      | 2.08                     | 0.53              |
| 6:F:21:LEU:HD22   | 6:F:27:TRP:CD2      | 2.43                     | 0.53              |
| 1:A:291:ILE:HD13  | 1:A:373:ARG:HG3     | 1.90                     | 0.53              |
| 3:C:218:ASP:OD2   | 3:C:280:LYS:HE3     | 2.09                     | 0.53              |
| 3:C:259:LEU:O     | 3:C:380:ASN:ND2     | 2.39                     | 0.53              |
| 4:D:115:VAL:O     | 4:D:119:LEU:HG      | 2.08                     | 0.53              |
| 1:A:289:ALA:HA    | 1:A:331:ALA:HB2     | 1.91                     | 0.53              |
| 2:B:292:THR:HG22  | 2:B:319:PHE:HZ      | 1.74                     | 0.53              |
| 3:C:254:GLU:HG2   | 3:C:352:LYS:HE2     | 1.90                     | 0.53              |
| 4:D:108:TYR:O     | 5:E:134:ARG:NH1     | 2.41                     | 0.53              |
| 1:A:151:SER:HB2   | 1:A:193:THR:CG2     | 2.37                     | 0.53              |
| 1:A:437:VAL:HG12  | 1:A:438:ASP:N       | 2.23                     | 0.53              |
| 6:F:74:LYS:HE3    | 6:F:331:GLU:OE1     | 2.09                     | 0.53              |
| 4:D:20:PHE:CD1    | 4:D:235:MET:HE2     | 2.43                     | 0.53              |
| 4:D:141:LEU:HD12  | 4:D:172:MET:SD      | 2.49                     | 0.53              |
| 4:D:9:ALA:O       | 4:D:13:GLY:HA3      | 2.08                     | 0.53              |
| 6:F:8:ASP:HB2     | 6:F:43:GLU:HA       | 1.91                     | 0.53              |
| 1:A:103:TYR:CE1   | 1:A:148:GLY:HA2     | 2.44                     | 0.53              |
| 3:C:70:LEU:HD13   | 3:C:110:ILE:HG22    | 1.89                     | 0.53              |
| 2:B:22[B]:GLU:HG3 | 2:B:83:PHE:CE1      | 2.44                     | 0.52              |
| 3:C:190:THR:O     | 3:C:194[B]:THR:HG23 | 2.09                     | 0.52              |
| 4:D:288:VAL:HG12  | 4:D:331:GLN:HG3     | 1.91                     | 0.52              |
| 2:B:220:THR:HG23  | 2:B:221:THR:HG22    | 1.91                     | 0.52              |
| 4:D:103:TRP:HB2   | 4:D:186:ASN:OD1     | 2.09                     | 0.52              |
| 6:F:73:ARG:HB2    | 6:F:76[B]:SER:OG    | 2.09                     | 0.52              |
| 4:D:2:ARG:HB3     | 4:D:133:GLN:NE2     | 2.24                     | 0.52              |
| 1:A:21:TRP:CE3    | 1:A:63:PRO:HB3      | 2.44                     | 0.52              |
| 2:B:286:LEU:HD22  | 2:B:290:GLU:CB      | 2.39                     | 0.52              |
| 2:B:295:MET:SD    | 2:B:375:ALA:HB1     | 2.49                     | 0.52              |
| 3:C:187:SER:HB3   | 3:C:391:LEU:HD21    | 1.91                     | 0.52              |
| 3:C:317:LEU:HD23  | 3:C:377:MET:HG3     | 1.92                     | 0.52              |
| 2:B:69:ASP:HA     | 2:B:145:THR:HG21    | 1.93                     | 0.51              |
| 4:D:183:GLU:OE2   | 10:X:509:GDP:H3'    | 2.10                     | 0.51              |
| 6:F:146:VAL:HG23  | 6:F:187:GLU:OE2     | 2.10                     | 0.51              |
| 1:A:285:GLN:HG3   | 1:A:372[B]:GLN:CD   | 2.30                     | 0.51              |
| 3:C:36:MET:HB3    | 3:C:61:HIS:CE1      | 2.45                     | 0.51              |
| 4:D:324:SER:OG    | 4:D:327:GLU:HB2     | 2.10                     | 0.51              |
| 2:B:286:LEU:HD22  | 2:B:290:GLU:HB3     | 1.92                     | 0.51              |
| 3:C:69:ASP:O      | 3:C:94:THR:HA       | 2.10                     | 0.51              |
| 4:D:165:ILE:HA    | 4:D:199:ASP:OD2     | 2.10                     | 0.51              |
| 2:B:346:TRP:HE1   | 2:B:438:ALA:CB      | 2.24                     | 0.51              |

Continued on next page...

Continued from previous page...

| Atom-1            | Atom-2            | Interatomic distance (Å) | Clash overlap (Å) |
|-------------------|-------------------|--------------------------|-------------------|
| 2:B:31:ASP:OD2    | 2:B:33:THR:HG22   | 2.10                     | 0.51              |
| 3:C:293[B]:ASN:CG | 3:C:335:ILE:HD11  | 2.31                     | 0.51              |
| 4:D:26:ASP:OD2    | 4:D:369:ARG:HD3   | 2.11                     | 0.51              |
| 4:D:269[A]:MET:CE | 4:D:305:CYS:HB2   | 2.41                     | 0.51              |
| 2:B:352:LYS:HG3   | 11:X:506:COL:C4   | 2.41                     | 0.51              |
| 4:D:180:THR:HG22  | 4:D:182:VAL:H     | 1.74                     | 0.51              |
| 1:A:71:GLU:HG2    | 1:A:98:ASP:HB3    | 1.93                     | 0.51              |
| 6:F:32:LYS:HG3    | 6:F:33:ASP:N      | 2.25                     | 0.50              |
| 3:C:271:THR:HG21  | 3:C:295[B]:CYS:HA | 1.93                     | 0.50              |
| 6:F:21:LEU:HD22   | 6:F:27:TRP:CE2    | 2.46                     | 0.50              |
| 1:A:79:ARG:HH22   | 1:A:94:THR:CG2    | 2.25                     | 0.50              |
| 1:A:107:HIS:CD2   | 1:A:152:LEU:HB2   | 2.46                     | 0.50              |
| 1:A:191:THR:O     | 1:A:195:LEU:HB2   | 2.12                     | 0.50              |
| 2:B:238:VAL:HG22  | 2:B:378:ILE:HD11  | 1.94                     | 0.50              |
| 4:D:1:MET:O       | 4:D:131:CYS:HB3   | 2.11                     | 0.50              |
| 2:B:7:ILE:O       | 2:B:137:LEU:HA    | 2.12                     | 0.50              |
| 2:B:269:MET:HE1   | 2:B:301:MET:HG3   | 1.94                     | 0.50              |
| 3:C:115:ILE:HG23  | 3:C:116:ASP:N     | 2.26                     | 0.50              |
| 3:C:210:TYR:CE1   | 3:C:222:PRO:HD2   | 2.46                     | 0.50              |
| 5:E:132:GLU:O     | 5:E:136:ASN:HB2   | 2.11                     | 0.50              |
| 1:A:79:ARG:NH2    | 1:A:94:THR:HG21   | 2.26                     | 0.50              |
| 2:B:1:MET:HB2     | 2:B:3:GLU:OE2     | 2.12                     | 0.50              |
| 3:C:175:PRO:HA    | 3:C:179:THR:HG22  | 1.94                     | 0.50              |
| 2:B:137:LEU:CD2   | 2:B:154:ILE:HD11  | 2.42                     | 0.50              |
| 6:F:148:ILE:HG12  | 6:F:150:LYS:HG2   | 1.92                     | 0.50              |
| 4:D:287:THR:OG1   | 4:D:289:PRO:HD2   | 2.11                     | 0.49              |
| 2:B:137:LEU:HD23  | 2:B:154:ILE:HD11  | 1.94                     | 0.49              |
| 2:B:180:THR:HA    | 3:C:258:ASN:HD21  | 1.75                     | 0.49              |
| 2:B:385:GLN:HB2   | 2:B:429:VAL:HG13  | 1.95                     | 0.49              |
| 3:C:46:ASP:OD1    | 3:C:46:ASP:N      | 2.43                     | 0.49              |
| 4:D:67:LEU:N      | 4:D:67:LEU:HD12   | 2.27                     | 0.49              |
| 2:B:1:MET:HE1     | 2:B:50[A]:ASN:HB3 | 1.93                     | 0.49              |
| 4:D:20:PHE:O      | 4:D:24:ILE:HG12   | 2.13                     | 0.49              |
| 2:B:67:LEU:N      | 2:B:67:LEU:HD12   | 2.27                     | 0.49              |
| 1:A:36:MET:HB3    | 1:A:61:HIS:NE2    | 2.27                     | 0.49              |
| 6:F:304:THR:HG21  | 6:F:311:SER:HB2   | 1.95                     | 0.49              |
| 3:C:119:LEU:HD11  | 3:C:156:ARG:CB    | 2.42                     | 0.49              |
| 2:B:287:THR:HG22  | 2:B:290:GLU:HG3   | 1.92                     | 0.49              |
| 2:B:295:MET:CG    | 2:B:377:PHE:HB2   | 2.43                     | 0.49              |
| 6:F:339:ALA:HB3   | 6:F:342:LEU:CD1   | 2.39                     | 0.49              |
| 4:D:138:THR:HG22  | 4:D:169:PHE:HB2   | 1.95                     | 0.49              |

Continued on next page...

Continued from previous page...

| Atom-1              | Atom-2             | Interatomic distance (Å) | Clash overlap (Å) |
|---------------------|--------------------|--------------------------|-------------------|
| 4:D:297:ASP:OD1     | 4:D:298:SER:N      | 2.46                     | 0.49              |
| 1:A:93:ILE:CD1      | 1:A:121:ARG:HG3    | 2.41                     | 0.49              |
| 1:A:103:TYR:CD1     | 1:A:148:GLY:HA2    | 2.48                     | 0.49              |
| 1:A:103:TYR:CD2     | 1:A:189:LEU:HD13   | 2.48                     | 0.49              |
| 2:B:70:LEU:HD12     | 2:B:99:ALA:HB2     | 1.95                     | 0.49              |
| 2:B:346:TRP:HE1     | 2:B:438:ALA:HB3    | 1.78                     | 0.49              |
| 3:C:186:ASN:O       | 3:C:190:THR:HG22   | 2.12                     | 0.49              |
| 4:D:5:VAL:HB        | 4:D:135:PHE:CD2    | 2.48                     | 0.49              |
| 1:A:255:PHE:O       | 1:A:259:LEU:HB2    | 2.13                     | 0.48              |
| 2:B:274:PRO:HB3     | 2:B:286:LEU:CD1    | 2.42                     | 0.48              |
| 2:B:318:ILE:HD12    | 2:B:318:ILE:N      | 2.28                     | 0.48              |
| 3:C:99:ALA:HB3      | 3:C:144:GLY:HA3    | 1.95                     | 0.48              |
| 3:C:271:THR:HG21    | 3:C:295[A]:CYS:HA  | 1.94                     | 0.48              |
| 6:F:102:PRO:HB3     | 6:F:173:ILE:CG2    | 2.44                     | 0.48              |
| 6:F:205:VAL:CG2     | 6:F:291:ILE:HD13   | 2.43                     | 0.48              |
| 2:B:191:VAL:HG11    | 2:B:425:MET:HE2    | 1.96                     | 0.48              |
| 2:B:202:TYR:CZ      | 2:B:238:VAL:HG11   | 2.49                     | 0.48              |
| 3:C:108:TYR:O       | 3:C:112:LYS:HG2    | 2.13                     | 0.48              |
| 2:B:21:TRP:CZ3      | 2:B:63:PRO:HB3     | 2.48                     | 0.48              |
| 3:C:174:ALA:HB1     | 3:C:207:GLU:HB2    | 1.95                     | 0.48              |
| 1:A:252:LEU:HD22    | 1:A:252:LEU:H      | 1.78                     | 0.48              |
| 2:B:171:VAL:HA      | 2:B:204:ILE:O      | 2.14                     | 0.48              |
| 4:D:287:THR:CB      | 4:D:289:PRO:HD2    | 2.44                     | 0.48              |
| 1:A:136[A]:LEU:HD23 | 1:A:167:LEU:HB2    | 1.94                     | 0.48              |
| 1:A:180:ALA:HB1     | 2:B:258:ASN:OD1    | 2.12                     | 0.48              |
| 1:A:339:ARG:HB2     | 1:A:341:ILE:HD11   | 1.96                     | 0.48              |
| 3:C:70:LEU:HD13     | 3:C:110:ILE:HG21   | 1.93                     | 0.48              |
| 6:F:102:PRO:HA      | 6:F:173:ILE:HG22   | 1.96                     | 0.48              |
| 6:F:168:GLU:OE1     | 6:F:168:GLU:N      | 2.39                     | 0.48              |
| 1:A:188:ILE:HG13    | 1:A:425:MET:HG3    | 1.96                     | 0.47              |
| 1:A:336:LYS:HD3     | 1:A:336:LYS:O      | 2.14                     | 0.47              |
| 2:B:20:PHE:CZ       | 2:B:24:ILE:HD13    | 2.49                     | 0.47              |
| 2:B:31:ASP:CG       | 2:B:33:THR:HG22    | 2.34                     | 0.47              |
| 4:D:172:MET:HE2     | 4:D:387:LEU:HD21   | 1.96                     | 0.47              |
| 4:D:347:ILE:HG22    | 4:D:350:ASN:HB3    | 1.95                     | 0.47              |
| 2:B:357:ASP:O       | 2:B:359:PRO:HD3    | 2.14                     | 0.47              |
| 4:D:269[A]:MET:HE1  | 4:D:305:CYS:HB2    | 1.97                     | 0.47              |
| 6:F:250:SER:C       | 6:F:253:TYR:H      | 2.17                     | 0.47              |
| 1:A:115:ILE:HG23    | 1:A:116:ASP:N      | 2.30                     | 0.47              |
| 6:F:3:THR:HB        | 6:F:30:LEU:HD11    | 1.97                     | 0.47              |
| 1:A:2:ARG:O         | 1:A:51[A]:THR:HG22 | 2.14                     | 0.47              |

Continued on next page...

Continued from previous page...

| Atom-1              | Atom-2              | Interatomic distance (Å) | Clash overlap (Å) |
|---------------------|---------------------|--------------------------|-------------------|
| 4:D:191:VAL:HB      | 4:D:425:MET:CE      | 2.45                     | 0.47              |
| 4:D:191:VAL:O       | 4:D:195:VAL:HG23    | 2.14                     | 0.47              |
| 4:D:314:THR:HB      | 11:X:511:COL:C6     | 2.43                     | 0.47              |
| 1:A:383:ALA:O       | 1:A:386:GLU:HG3     | 2.14                     | 0.47              |
| 1:A:209[B]:ILE:HG13 | 1:A:227:LEU:HD22    | 1.96                     | 0.47              |
| 3:C:71:GLU:HG2      | 3:C:98:ASP:HB3      | 1.96                     | 0.47              |
| 6:F:36:ARG:HA       | 6:F:58:LEU:CD1      | 2.44                     | 0.47              |
| 1:A:71:GLU:OE1      | 1:A:73:THR:HG22     | 2.15                     | 0.46              |
| 4:D:177:VAL:HG12    | 4:D:177:VAL:O       | 2.15                     | 0.46              |
| 4:D:381:SER:O       | 4:D:384[B]:ILE:HG22 | 2.15                     | 0.46              |
| 4:D:402:LYS:HE2     | 4:D:415:GLU:OE2     | 2.14                     | 0.46              |
| 1:A:91:GLN:C        | 1:A:92:LEU:HD22     | 2.36                     | 0.46              |
| 1:A:175:PRO:HA      | 1:A:179:THR:OG1     | 2.15                     | 0.46              |
| 4:D:136:GLN:HA      | 4:D:167:ASN:O       | 2.15                     | 0.46              |
| 6:F:148:ILE:HG23    | 6:F:148:ILE:O       | 2.16                     | 0.46              |
| 1:A:269:LEU:HD11    | 1:A:301:GLN:HB3     | 1.97                     | 0.46              |
| 4:D:295:MET:HG3     | 4:D:377:PHE:HB2     | 1.97                     | 0.46              |
| 2:B:1:MET:HE1       | 2:B:50[B]:ASN:CB    | 2.45                     | 0.46              |
| 2:B:103:TRP:CE3     | 2:B:189:LEU:HD13    | 2.50                     | 0.46              |
| 6:F:280:GLU:HA      | 6:F:284[B]:LEU:HB2  | 1.97                     | 0.46              |
| 1:A:192:HIS:CG      | 1:A:421:ALA:HA      | 2.51                     | 0.46              |
| 3:C:363:VAL:HG23    | 3:C:364:PRO:HD2     | 1.97                     | 0.46              |
| 4:D:36:TYR:CD1      | 4:D:46:LEU:HD21     | 2.50                     | 0.46              |
| 3:C:249:ASN:ND2     | 3:C:356[A]:ASN:OD1  | 2.49                     | 0.46              |
| 4:D:159:GLU:HG3     | 5:E:123:LEU:HD13    | 1.98                     | 0.46              |
| 2:B:75:MET:HG2      | 2:B:94:PHE:CD2      | 2.51                     | 0.46              |
| 2:B:287:THR:CG2     | 2:B:290:GLU:H       | 2.28                     | 0.46              |
| 4:D:154:ILE:HG23    | 4:D:166:MET:HG2     | 1.98                     | 0.46              |
| 6:F:253:TYR:OH      | 6:F:259:GLY:HA2     | 2.17                     | 0.45              |
| 1:A:335:ILE:C       | 1:A:335:ILE:HD12    | 2.37                     | 0.45              |
| 4:D:115:VAL:HG23    | 4:D:153:LEU:CD2     | 2.47                     | 0.45              |
| 4:D:7:ILE:O         | 4:D:137:LEU:HA      | 2.16                     | 0.45              |
| 4:D:414:ASP:OD2     | 4:D:416:MET:HB2     | 2.16                     | 0.45              |
| 6:F:186:LEU:HD12    | 6:F:320:MET:HG2     | 1.99                     | 0.45              |
| 1:A:187:SER:HB3     | 1:A:391:LEU:HD21    | 1.98                     | 0.45              |
| 6:F:195:GLY:O       | 6:F:227:PRO:HB3     | 2.16                     | 0.45              |
| 1:A:75:ILE:HD12     | 1:A:94:THR:HG22     | 1.98                     | 0.45              |
| 1:A:341:ILE:N       | 1:A:341:ILE:HD12    | 2.32                     | 0.45              |
| 2:B:335:VAL:O       | 2:B:339:ASN:ND2     | 2.41                     | 0.45              |
| 3:C:217:LEU:HD21    | 3:C:368:LEU:HD23    | 1.99                     | 0.45              |
| 4:D:409:THR:O       | 5:E:140:LYS:HE3     | 2.17                     | 0.45              |

Continued on next page...

Continued from previous page...

| Atom-1           | Atom-2           | Interatomic distance (Å) | Clash overlap (Å) |
|------------------|------------------|--------------------------|-------------------|
| 2:B:172:MET:HG3  | 2:B:387:LEU:HD11 | 1.99                     | 0.45              |
| 2:B:212:ILE:HG23 | 2:B:275:LEU:HD13 | 1.99                     | 0.45              |
| 4:D:161:TYR:HB3  | 4:D:164:ARG:CG   | 2.47                     | 0.45              |
| 4:D:301:MET:C    | 4:D:303:ALA:H    | 2.20                     | 0.45              |
| 1:A:23:LEU:O     | 1:A:27:GLU:HG3   | 2.17                     | 0.45              |
| 6:F:253:TYR:CZ   | 6:F:259:GLY:HA2  | 2.52                     | 0.45              |
| 6:F:267:PHE:CD2  | 6:F:279:LEU:HD13 | 2.51                     | 0.45              |
| 3:C:177:VAL:CG2  | 3:C:206:ASN:HB3  | 2.45                     | 0.45              |
| 4:D:244:PHE:CZ   | 4:D:358:ILE:CD1  | 3.00                     | 0.45              |
| 6:F:165:GLU:HB3  | 6:F:168:GLU:OE2  | 2.17                     | 0.45              |
| 1:A:2:ARG:NE     | 1:A:251:ASP:HB3  | 2.32                     | 0.44              |
| 6:F:168:GLU:HG2  | 6:F:169:LEU:N    | 2.32                     | 0.44              |
| 6:F:202:ARG:NH2  | 6:F:222:ARG:HH12 | 2.15                     | 0.44              |
| 2:B:1:MET:HE1    | 2:B:50[A]:ASN:CB | 2.46                     | 0.44              |
| 6:F:37:PHE:O     | 6:F:60:GLN:HG2   | 2.18                     | 0.44              |
| 1:A:12:ALA:HB3   | 1:A:140:SER:HB3  | 2.00                     | 0.44              |
| 4:D:119:LEU:O    | 4:D:122:VAL:HG22 | 2.18                     | 0.44              |
| 5:E:53:LYS:HE2   | 5:E:53:LYS:HB3   | 1.84                     | 0.44              |
| 3:C:285:GLN:OE1  | 3:C:372:GLN:NE2  | 2.50                     | 0.44              |
| 1:A:75:ILE:CG2   | 1:A:92:LEU:HD12  | 2.45                     | 0.44              |
| 1:A:287:SER:OG   | 1:A:290:GLU:HG3  | 2.17                     | 0.44              |
| 2:B:69:ASP:O     | 2:B:94:PHE:HA    | 2.18                     | 0.44              |
| 3:C:172:TYR:HB3  | 3:C:205:ASP:HA   | 2.00                     | 0.44              |
| 4:D:295:MET:CG   | 4:D:377:PHE:HB2  | 2.48                     | 0.44              |
| 2:B:42:LEU:HD12  | 2:B:358:ILE:HD11 | 1.99                     | 0.44              |
| 2:B:172:MET:HE2  | 2:B:172:MET:HB3  | 1.92                     | 0.44              |
| 5:E:6:MET:HG2    | 5:E:24:LEU:CD2   | 2.48                     | 0.44              |
| 6:F:205:VAL:HG21 | 6:F:291:ILE:HD13 | 2.00                     | 0.44              |
| 6:F:299:GLU:N    | 6:F:300:PRO:HD2  | 2.33                     | 0.44              |
| 4:D:117:SER:O    | 4:D:121:VAL:HG23 | 2.17                     | 0.44              |
| 4:D:48:ARG:HD3   | 4:D:48:ARG:HA    | 1.77                     | 0.43              |
| 6:F:148:ILE:HG13 | 6:F:162:ILE:HG12 | 1.98                     | 0.43              |
| 3:C:183:GLU:N    | 3:C:184:PRO:CD   | 2.82                     | 0.43              |
| 3:C:234:ILE:HD12 | 3:C:234:ILE:N    | 2.33                     | 0.43              |
| 5:E:48:GLU:O     | 5:E:52:LYS:HG3   | 2.18                     | 0.43              |
| 1:A:217:LEU:HD21 | 1:A:275:VAL:HG12 | 2.00                     | 0.43              |
| 1:A:210:TYR:CE2  | 1:A:214:ARG:HD2  | 2.53                     | 0.43              |
| 2:B:2:ARG:HB3    | 2:B:133:GLN:NE2  | 2.33                     | 0.43              |
| 2:B:21:TRP:CE3   | 2:B:63:PRO:HB3   | 2.53                     | 0.43              |
| 2:B:295:MET:HG2  | 2:B:377:PHE:HB2  | 2.01                     | 0.43              |
| 4:D:35:SER:OG    | 4:D:60:LYS:HE3   | 2.17                     | 0.43              |

Continued on next page...

Continued from previous page...

| Atom-1              | Atom-2            | Interatomic distance (Å) | Clash overlap (Å) |
|---------------------|-------------------|--------------------------|-------------------|
| 6:F:82:LYS:NZ       | 6:F:97:SER:O      | 2.48                     | 0.43              |
| 1:A:234:ILE:O       | 1:A:238:ILE:HG13  | 2.19                     | 0.43              |
| 1:A:411:GLU:O       | 5:E:61:ARG:HD3    | 2.18                     | 0.43              |
| 2:B:63:PRO:HD3      | 2:B:86:ILE:HG12   | 2.00                     | 0.43              |
| 2:B:275:LEU:HD23    | 2:B:275:LEU:HA    | 1.76                     | 0.43              |
| 2:B:287:THR:HG22    | 2:B:290:GLU:CB    | 2.48                     | 0.43              |
| 2:B:385:GLN:OE1     | 2:B:389:LYS:HE3   | 2.19                     | 0.43              |
| 6:F:37:PHE:HZ       | 6:F:52:LEU:CD2    | 2.32                     | 0.43              |
| 6:F:238:CYS:HG      | 6:F:239:HIS:CE1   | 2.35                     | 0.43              |
| 6:F:172:PHE:HD1     | 6:F:172:PHE:O     | 2.01                     | 0.43              |
| 6:F:284[A]:LEU:HD12 | 6:F:284[A]:LEU:HA | 1.78                     | 0.43              |
| 2:B:305:CYS:O       | 2:B:307:PRO:HD3   | 2.19                     | 0.43              |
| 3:C:388:TRP:HA      | 3:C:388:TRP:CE3   | 2.54                     | 0.43              |
| 6:F:2:TYR:CE1       | 6:F:359:PHE:HB3   | 2.53                     | 0.43              |
| 1:A:55:GLU:HA       | 1:A:60:LYS:O      | 2.18                     | 0.43              |
| 2:B:287:THR:HG22    | 2:B:290:GLU:HB2   | 2.00                     | 0.43              |
| 1:A:209[A]:ILE:HD11 | 1:A:302[A]:MET:SD | 2.59                     | 0.42              |
| 5:E:75:LYS:O        | 5:E:79:GLU:HG3    | 2.19                     | 0.42              |
| 2:B:286:LEU:HD23    | 2:B:286:LEU:HA    | 1.84                     | 0.42              |
| 4:D:9:ALA:HA        | 4:D:68:VAL:O      | 2.19                     | 0.42              |
| 4:D:258:ASN:HB3     | 11:X:511:COL:C4   | 2.49                     | 0.42              |
| 1:A:100:ALA:HA      | 2:B:254:LYS:CG    | 2.49                     | 0.42              |
| 1:A:285:GLN:OE1     | 1:A:285:GLN:N     | 2.51                     | 0.42              |
| 1:A:262:TYR:HE2     | 1:A:346:TRP:CH2   | 2.37                     | 0.42              |
| 2:B:297:ASP:OD1     | 2:B:298:SER:N     | 2.53                     | 0.42              |
| 3:C:72:PRO:CG       | 4:D:1:MET:CE      | 2.96                     | 0.42              |
| 4:D:114:LEU:HG      | 4:D:114:LEU:O     | 2.18                     | 0.42              |
| 4:D:208:ALA:O       | 4:D:212:ILE:HG13  | 2.19                     | 0.42              |
| 6:F:18:SER:O        | 6:F:22:LEU:HG     | 2.19                     | 0.42              |
| 1:A:39:ASP:OD2      | 1:A:61:HIS:HE1    | 2.03                     | 0.42              |
| 4:D:50:ASN:HD22     | 4:D:50:ASN:H      | 1.68                     | 0.42              |
| 4:D:212:ILE:O       | 4:D:216:THR:HB    | 2.19                     | 0.42              |
| 6:F:24:THR:HG22     | 6:F:26:GLN:HG3    | 2.02                     | 0.42              |
| 4:D:317:ALA:O       | 4:D:353:THR:HA    | 2.20                     | 0.42              |
| 2:B:20:PHE:CE2      | 2:B:24:ILE:HD13   | 2.55                     | 0.42              |
| 1:A:93:ILE:HD11     | 1:A:121:ARG:CG    | 2.45                     | 0.42              |
| 1:A:319:TYR:HB3     | 1:A:323:VAL:HG21  | 2.01                     | 0.42              |
| 1:A:345:ASP:HB3     | 5:E:28:SER:HB2    | 2.01                     | 0.42              |
| 3:C:277:SER:OG      | 3:C:280:LYS:HG3   | 2.20                     | 0.42              |
| 4:D:292:THR:CG2     | 4:D:335:VAL:HG21  | 2.46                     | 0.42              |
| 5:E:76:ARG:HA       | 5:E:76:ARG:HD3    | 1.89                     | 0.42              |

Continued on next page...

Continued from previous page...

| Atom-1              | Atom-2             | Interatomic distance (Å) | Clash overlap (Å) |
|---------------------|--------------------|--------------------------|-------------------|
| 4:D:264:ARG:NE      | 4:D:431:GLU:OE2    | 2.52                     | 0.41              |
| 1:A:216:ASN:HD22    | 1:A:275:VAL:HB     | 1.86                     | 0.41              |
| 2:B:31:ASP:HB2      | 2:B:32:PRO:CD      | 2.49                     | 0.41              |
| 4:D:102:ASN:HD22    | 4:D:105:LYS:HG3    | 1.84                     | 0.41              |
| 4:D:165:ILE:HG21    | 4:D:252:LEU:HB3    | 2.02                     | 0.41              |
| 5:E:47:LEU:HD23     | 5:E:47:LEU:O       | 2.21                     | 0.41              |
| 6:F:21:LEU:HD21     | 6:F:355:ILE:HG21   | 2.03                     | 0.41              |
| 6:F:38:ASN:O        | 6:F:60:GLN:HA      | 2.20                     | 0.41              |
| 6:F:95:PRO:HB2      | 6:F:183:GLN:CG     | 2.50                     | 0.41              |
| 1:A:209[A]:ILE:HG22 | 1:A:227:LEU:CD2    | 2.49                     | 0.41              |
| 3:C:22:GLU:O        | 3:C:26:LEU:HG      | 2.20                     | 0.41              |
| 3:C:117:LEU:HD21    | 3:C:121:ARG:NH2    | 2.35                     | 0.41              |
| 3:C:178:SER:HB2     | 3:C:224:TYR:OH     | 2.20                     | 0.41              |
| 3:C:361:THR:CG2     | 3:C:362:VAL:N      | 2.84                     | 0.41              |
| 3:C:153:LEU:O       | 3:C:157:LEU:HG     | 2.20                     | 0.41              |
| 4:D:414:ASP:N       | 4:D:414:ASP:OD1    | 2.53                     | 0.41              |
| 1:A:16:ILE:CD1      | 1:A:171:ILE:HD11   | 2.50                     | 0.41              |
| 1:A:151:SER:HB2     | 1:A:193:THR:HG22   | 2.00                     | 0.41              |
| 1:A:209[A]:ILE:HG22 | 1:A:227:LEU:HD22   | 2.01                     | 0.41              |
| 3:C:72:PRO:HG2      | 4:D:1:MET:CE       | 2.51                     | 0.41              |
| 3:C:255:PHE:CD1     | 3:C:316:CYS:HB3    | 2.56                     | 0.41              |
| 6:F:168:GLU:O       | 6:F:172:PHE:HB2    | 2.21                     | 0.41              |
| 3:C:304:LYS:HE3     | 3:C:304:LYS:HB2    | 1.95                     | 0.41              |
| 4:D:115:VAL:HG23    | 4:D:153:LEU:HD23   | 2.02                     | 0.41              |
| 4:D:172:MET:HG3     | 4:D:387:LEU:HD11   | 2.02                     | 0.41              |
| 4:D:270:PRO:HA      | 4:D:377:PHE:O      | 2.20                     | 0.41              |
| 6:F:224:SER:HB2     | 6:F:241:THR:HG22   | 2.03                     | 0.41              |
| 1:A:132:LEU:O       | 1:A:164:LYS:NZ     | 2.51                     | 0.41              |
| 1:A:358:GLN:HA      | 1:A:359:PRO:HD3    | 1.95                     | 0.41              |
| 4:D:291:LEU:HD12    | 4:D:291:LEU:HA     | 1.86                     | 0.41              |
| 1:A:209[B]:ILE:HD13 | 1:A:231:ILE:HD11   | 2.02                     | 0.41              |
| 1:A:262:TYR:HA      | 1:A:263:PRO:HD3    | 1.92                     | 0.41              |
| 1:A:437:VAL:CG1     | 1:A:438:ASP:N      | 2.84                     | 0.41              |
| 3:C:72:PRO:HG2      | 4:D:1:MET:HE1      | 2.03                     | 0.41              |
| 5:E:6:MET:HE3       | 5:E:6:MET:HB3      | 1.84                     | 0.41              |
| 6:F:24:THR:CG2      | 6:F:361:LEU:HD13   | 2.50                     | 0.41              |
| 3:C:66:VAL:HG12     | 3:C:68[A]:VAL:HG23 | 2.02                     | 0.41              |
| 6:F:252:ASN:ND2     | 6:F:255:ARG:HD2    | 2.36                     | 0.41              |
| 6:F:279:LEU:HG      | 6:F:284[B]:LEU:HG  | 2.03                     | 0.41              |
| 6:F:340:GLN:HA      | 6:F:343:TYR:HD2    | 1.86                     | 0.41              |
| 2:B:312:TYR:CE1     | 2:B:377:PHE:HZ     | 2.39                     | 0.40              |

Continued on next page...

Continued from previous page...

| Atom-1           | Atom-2             | Interatomic distance (Å) | Clash overlap (Å) |
|------------------|--------------------|--------------------------|-------------------|
| 4:D:235:MET:HE2  | 4:D:235:MET:HB3    | 1.94                     | 0.40              |
| 1:A:133:GLN:HB2  | 1:A:252:LEU:HD23   | 2.04                     | 0.40              |
| 1:A:183:GLU:N    | 1:A:184:PRO:CD     | 2.85                     | 0.40              |
| 1:A:192:HIS:NE2  | 1:A:420[A]:GLU:HG2 | 2.36                     | 0.40              |
| 6:F:24:THR:HG23  | 6:F:361:LEU:HD13   | 2.03                     | 0.40              |
| 3:C:195:LEU:HD12 | 3:C:266:HIS:CE1    | 2.57                     | 0.40              |
| 4:D:387:LEU:HD23 | 4:D:387:LEU:C      | 2.41                     | 0.40              |
| 6:F:24:THR:HG22  | 6:F:26:GLN:H       | 1.86                     | 0.40              |
| 1:A:21:TRP:CZ2   | 1:A:65:ALA:HB2     | 2.57                     | 0.40              |
| 4:D:145:THR:O    | 4:D:149:MET:HB3    | 2.20                     | 0.40              |
| 2:B:205:ASP:HB3  | 2:B:303:ALA:HA     | 2.03                     | 0.40              |
| 4:D:287:THR:HB   | 4:D:289:PRO:HD2    | 2.03                     | 0.40              |

There are no symmetry-related clashes.

## 5.3 Torsion angles [i](#)

### 5.3.1 Protein backbone [i](#)

In the following table, the Percentiles column shows the percent Ramachandran outliers of the chain as a percentile score with respect to all X-ray entries followed by that with respect to entries of similar resolution.

The Analysed column shows the number of residues for which the backbone conformation was analysed, and the total number of residues.

| Mol | Chain | Analysed         | Favoured   | Allowed | Outliers | Percentiles |     |
|-----|-------|------------------|------------|---------|----------|-------------|-----|
| 1   | A     | 450/439 (102%)   | 431 (96%)  | 17 (4%) | 2 (0%)   | 34          | 72  |
| 2   | B     | 428/423 (101%)   | 406 (95%)  | 21 (5%) | 1 (0%)   | 47          | 82  |
| 3   | C     | 448/440 (102%)   | 432 (96%)  | 15 (3%) | 1 (0%)   | 47          | 82  |
| 4   | D     | 421/421 (100%)   | 400 (95%)  | 20 (5%) | 1 (0%)   | 47          | 82  |
| 5   | E     | 118/121 (98%)    | 116 (98%)  | 2 (2%)  | 0        | 100         | 100 |
| 6   | F     | 310/320 (97%)    | 288 (93%)  | 22 (7%) | 0        | 100         | 100 |
| All | All   | 2175/2164 (100%) | 2073 (95%) | 97 (4%) | 5 (0%)   | 47          | 82  |

All (5) Ramachandran outliers are listed below:

| Mol | Chain | Res | Type |
|-----|-------|-----|------|
| 3   | C     | 177 | VAL  |

Continued on next page...

Continued from previous page...

| Mol | Chain | Res | Type |
|-----|-------|-----|------|
| 1   | A     | 178 | SER  |
| 4   | D     | 74  | THR  |
| 2   | B     | 73  | GLY  |
| 1   | A     | 131 | GLY  |

### 5.3.2 Protein sidechains [i](#)

In the following table, the Percentiles column shows the percent sidechain outliers of the chain as a percentile score with respect to all X-ray entries followed by that with respect to entries of similar resolution.

The Analysed column shows the number of residues for which the sidechain conformation was analysed, and the total number of residues.

| Mol | Chain | Analysed         | Rotameric  | Outliers | Percentiles |     |
|-----|-------|------------------|------------|----------|-------------|-----|
| 1   | A     | 382/370 (103%)   | 379 (99%)  | 3 (1%)   | 81          | 93  |
| 2   | B     | 374/366 (102%)   | 374 (100%) | 0        | 100         | 100 |
| 3   | C     | 381/371 (103%)   | 379 (100%) | 2 (0%)   | 88          | 96  |
| 4   | D     | 367/364 (101%)   | 367 (100%) | 0        | 100         | 100 |
| 5   | E     | 110/109 (101%)   | 106 (96%)  | 4 (4%)   | 35          | 70  |
| 6   | F     | 294/289 (102%)   | 282 (96%)  | 12 (4%)  | 30          | 67  |
| All | All   | 1908/1869 (102%) | 1887 (99%) | 21 (1%)  | 73          | 90  |

All (21) residues with a non-rotameric sidechain are listed below:

| Mol | Chain | Res | Type |
|-----|-------|-----|------|
| 1   | A     | 2   | ARG  |
| 1   | A     | 133 | GLN  |
| 1   | A     | 284 | GLU  |
| 3   | C     | 71  | GLU  |
| 3   | C     | 245 | ASP  |
| 5   | E     | 6   | MET  |
| 5   | E     | 8   | VAL  |
| 5   | E     | 62  | LYS  |
| 5   | E     | 103 | GLN  |
| 6   | F     | 1   | MET  |
| 6   | F     | 33  | ASP  |
| 6   | F     | 91  | CYS  |
| 6   | F     | 125 | THR  |
| 6   | F     | 162 | ILE  |

Continued on next page...

Continued from previous page...

| Mol | Chain | Res | Type |
|-----|-------|-----|------|
| 6   | F     | 163 | SER  |
| 6   | F     | 172 | PHE  |
| 6   | F     | 211 | TYR  |
| 6   | F     | 222 | ARG  |
| 6   | F     | 249 | TYR  |
| 6   | F     | 257 | GLU  |
| 6   | F     | 311 | SER  |

Sometimes sidechains can be flipped to improve hydrogen bonding and reduce clashes. All (5) such sidechains are listed below:

| Mol | Chain | Res | Type |
|-----|-------|-----|------|
| 1   | A     | 293 | ASN  |
| 2   | B     | 167 | ASN  |
| 4   | D     | 136 | GLN  |
| 4   | D     | 167 | ASN  |
| 6   | F     | 333 | ASN  |

### 5.3.3 RNA [i](#)

There are no RNA molecules in this entry.

### 5.4 Non-standard residues in protein, DNA, RNA chains [i](#)

There are no non-standard protein/DNA/RNA residues in this entry.

### 5.5 Carbohydrates [i](#)

There are no monosaccharides in this entry.

### 5.6 Ligand geometry [i](#)

Of 13 ligands modelled in this entry, 6 are monoatomic and 2 could not be matched to an existing wwPDB Chemical Component Dictionary definition at this stage - leaving 5 for Mogul analysis.

In the following table, the Counts columns list the number of bonds (or angles) for which Mogul statistics could be retrieved, the number of bonds (or angles) that are observed in the model and the number of bonds (or angles) that are defined in the Chemical Component Dictionary. The Link column lists molecule types, if any, to which the group is linked. The Z score for a bond

length (or angle) is the number of standard deviations the observed value is removed from the expected value. A bond length (or angle) with  $|Z| > 2$  is considered an outlier worth inspection. RMSZ is the root-mean-square of all Z scores of the bond lengths (or angles).

| Mol | Type | Chain | Res | Link | Bond lengths |      |          | Bond angles |      |          |
|-----|------|-------|-----|------|--------------|------|----------|-------------|------|----------|
|     |      |       |     |      | Counts       | RMSZ | # Z  > 2 | Counts      | RMSZ | # Z  > 2 |
| 7   | GTP  | X     | 501 | 8    | 26,34,34     | 1.00 | 2 (7%)   | 32,54,54    | 0.72 | 1 (3%)   |
| 10  | GDP  | X     | 504 | 8    | 24,30,30     | 1.00 | 2 (8%)   | 30,47,47    | 0.66 | 1 (3%)   |
| 7   | GTP  | X     | 507 | 8    | 26,34,34     | 1.01 | 2 (7%)   | 32,54,54    | 0.69 | 1 (3%)   |
| 10  | GDP  | X     | 509 | 8    | 24,30,30     | 1.00 | 3 (12%)  | 30,47,47    | 0.68 | 1 (3%)   |
| 12  | ACP  | X     | 512 | -    | 27,33,33     | 0.91 | 1 (3%)   | 32,52,52    | 0.97 | 3 (9%)   |

In the following table, the Chirals column lists the number of chiral outliers, the number of chiral centers analysed, the number of these observed in the model and the number defined in the Chemical Component Dictionary. Similar counts are reported in the Torsion and Rings columns. '-' means no outliers of that kind were identified.

| Mol | Type | Chain | Res | Link | Chirals | Torsions   | Rings   |
|-----|------|-------|-----|------|---------|------------|---------|
| 7   | GTP  | X     | 501 | 8    | -       | 4/18/38/38 | 0/3/3/3 |
| 10  | GDP  | X     | 504 | 8    | -       | 4/12/32/32 | 0/3/3/3 |
| 7   | GTP  | X     | 507 | 8    | -       | 5/18/38/38 | 0/3/3/3 |
| 10  | GDP  | X     | 509 | 8    | -       | 5/12/32/32 | 0/3/3/3 |
| 12  | ACP  | X     | 512 | -    | -       | 6/15/38/38 | 0/3/3/3 |

All (10) bond length outliers are listed below:

| Mol | Chain | Res | Type | Atoms  | Z     | Observed(Å) | Ideal(Å) |
|-----|-------|-----|------|--------|-------|-------------|----------|
| 10  | X     | 509 | GDP  | C5-C6  | -2.78 | 1.41        | 1.47     |
| 7   | X     | 507 | GTP  | C5-C6  | -2.72 | 1.41        | 1.47     |
| 10  | X     | 504 | GDP  | C5-C6  | -2.69 | 1.41        | 1.47     |
| 7   | X     | 501 | GTP  | C5-C6  | -2.67 | 1.42        | 1.47     |
| 12  | X     | 512 | ACP  | PB-O2B | -2.44 | 1.50        | 1.56     |
| 7   | X     | 507 | GTP  | C8-N7  | -2.15 | 1.31        | 1.35     |
| 10  | X     | 509 | GDP  | C8-N7  | -2.12 | 1.31        | 1.35     |
| 10  | X     | 504 | GDP  | C8-N7  | -2.11 | 1.31        | 1.35     |
| 7   | X     | 501 | GTP  | C8-N7  | -2.10 | 1.31        | 1.35     |
| 10  | X     | 509 | GDP  | C5-C4  | -2.01 | 1.37        | 1.43     |

All (7) bond angle outliers are listed below:

| Mol | Chain | Res | Type | Atoms      | Z     | Observed(°) | Ideal(°) |
|-----|-------|-----|------|------------|-------|-------------|----------|
| 12  | X     | 512 | ACP  | O1G-PG-C3B | -2.53 | 105.80      | 111.24   |

Continued on next page...

Continued from previous page...

| Mol | Chain | Res | Type | Atoms       | Z    | Observed(°) | Ideal(°) |
|-----|-------|-----|------|-------------|------|-------------|----------|
| 12  | X     | 512 | ACP  | C3'-C2'-C1' | 2.43 | 104.63      | 100.98   |
| 12  | X     | 512 | ACP  | C5-C6-N6    | 2.19 | 123.67      | 120.35   |
| 10  | X     | 509 | GDP  | O6-C6-C5    | 2.09 | 128.46      | 124.37   |
| 7   | X     | 507 | GTP  | O6-C6-C5    | 2.06 | 128.39      | 124.37   |
| 7   | X     | 501 | GTP  | O6-C6-C5    | 2.06 | 128.39      | 124.37   |
| 10  | X     | 504 | GDP  | O6-C6-C5    | 2.05 | 128.37      | 124.37   |

There are no chirality outliers.

All (24) torsion outliers are listed below:

| Mol | Chain | Res | Type | Atoms          |
|-----|-------|-----|------|----------------|
| 7   | X     | 501 | GTP  | C5'-O5'-PA-O1A |
| 7   | X     | 507 | GTP  | C5'-O5'-PA-O1A |
| 10  | X     | 504 | GDP  | C5'-O5'-PA-O1A |
| 10  | X     | 509 | GDP  | C5'-O5'-PA-O1A |
| 12  | X     | 512 | ACP  | PG-C3B-PB-O1B  |
| 12  | X     | 512 | ACP  | PG-C3B-PB-O2B  |
| 12  | X     | 512 | ACP  | PG-C3B-PB-O3A  |
| 12  | X     | 512 | ACP  | C5'-O5'-PA-O3A |
| 12  | X     | 512 | ACP  | PB-O3A-PA-O5'  |
| 10  | X     | 509 | GDP  | C5'-O5'-PA-O3A |
| 10  | X     | 509 | GDP  | PB-O3A-PA-O2A  |
| 7   | X     | 501 | GTP  | C5'-O5'-PA-O2A |
| 7   | X     | 507 | GTP  | C5'-O5'-PA-O2A |
| 10  | X     | 504 | GDP  | C5'-O5'-PA-O2A |
| 10  | X     | 509 | GDP  | C5'-O5'-PA-O2A |
| 12  | X     | 512 | ACP  | C5'-O5'-PA-O1A |
| 7   | X     | 501 | GTP  | PB-O3B-PG-O3G  |
| 7   | X     | 507 | GTP  | PB-O3B-PG-O3G  |
| 7   | X     | 501 | GTP  | C5'-O5'-PA-O3A |
| 7   | X     | 507 | GTP  | C5'-O5'-PA-O3A |
| 10  | X     | 504 | GDP  | C5'-O5'-PA-O3A |
| 7   | X     | 507 | GTP  | PB-O3A-PA-O1A  |
| 10  | X     | 504 | GDP  | PB-O3A-PA-O2A  |
| 10  | X     | 509 | GDP  | PB-O3A-PA-O1A  |

There are no ring outliers.

2 monomers are involved in 3 short contacts:

| Mol | Chain | Res | Type | Clashes | Symm-Clashes |
|-----|-------|-----|------|---------|--------------|
| 10  | X     | 509 | GDP  | 2       | 0            |

Continued on next page...

Continued from previous page...

| Mol | Chain | Res | Type | Clashes | Symm-Clashes |
|-----|-------|-----|------|---------|--------------|
| 12  | X     | 512 | ACP  | 1       | 0            |

The following is a two-dimensional graphical depiction of Mogul quality analysis of bond lengths, bond angles, torsion angles, and ring geometry for all instances of the Ligand of Interest. In addition, ligands with molecular weight > 250 and outliers as shown on the validation Tables will also be included. For torsion angles, if less than 5% of the Mogul distribution of torsion angles is within 10 degrees of the torsion angle in question, then that torsion angle is considered an outlier. Any bond that is central to one or more torsion angles identified as an outlier by Mogul will be highlighted in the graph. For rings, the root-mean-square deviation (RMSD) between the ring in question and similar rings identified by Mogul is calculated over all ring torsion angles. If the average RMSD is greater than 60 degrees and the minimal RMSD between the ring in question and any Mogul-identified rings is also greater than 60 degrees, then that ring is considered an outlier. The outliers are highlighted in purple. The color gray indicates Mogul did not find sufficient equivalents in the CSD to analyse the geometry.

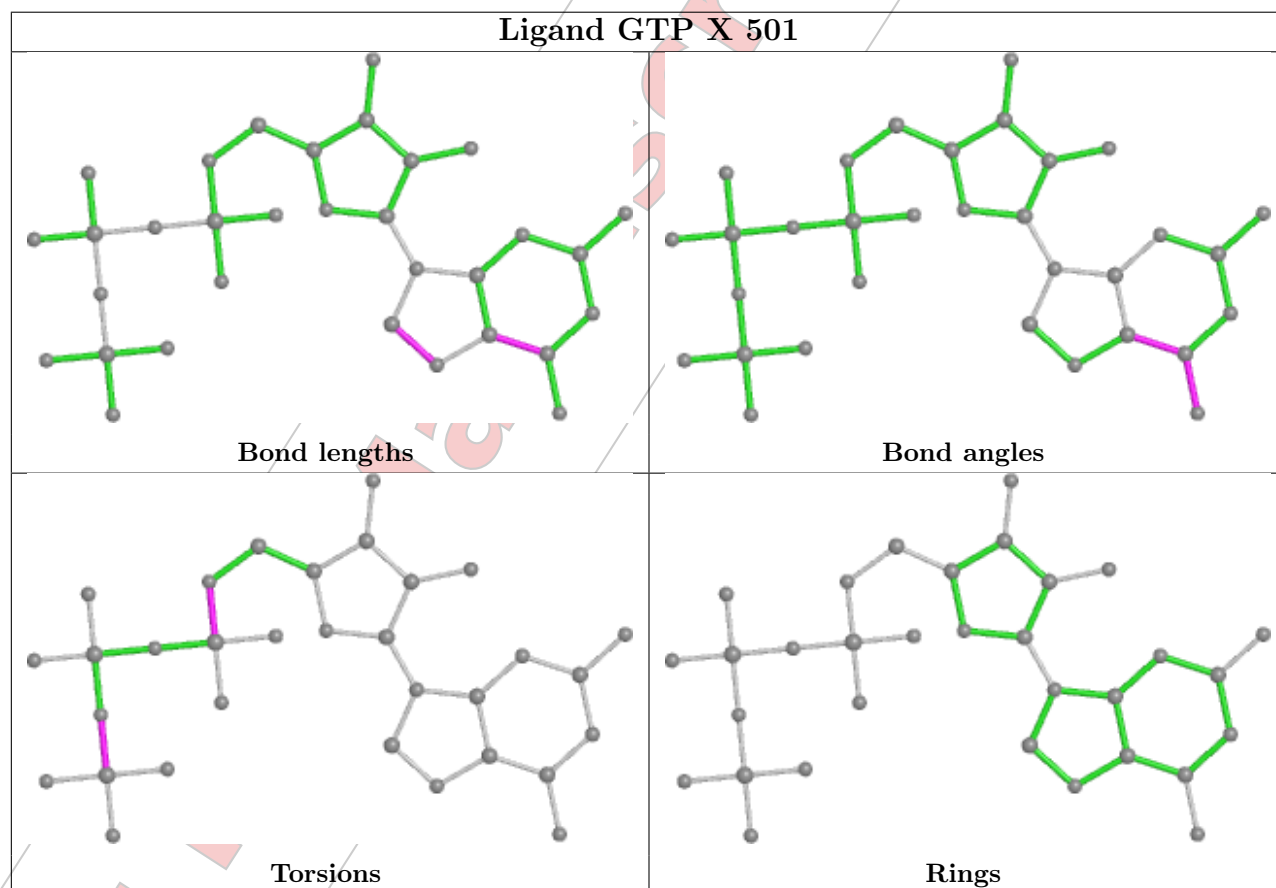

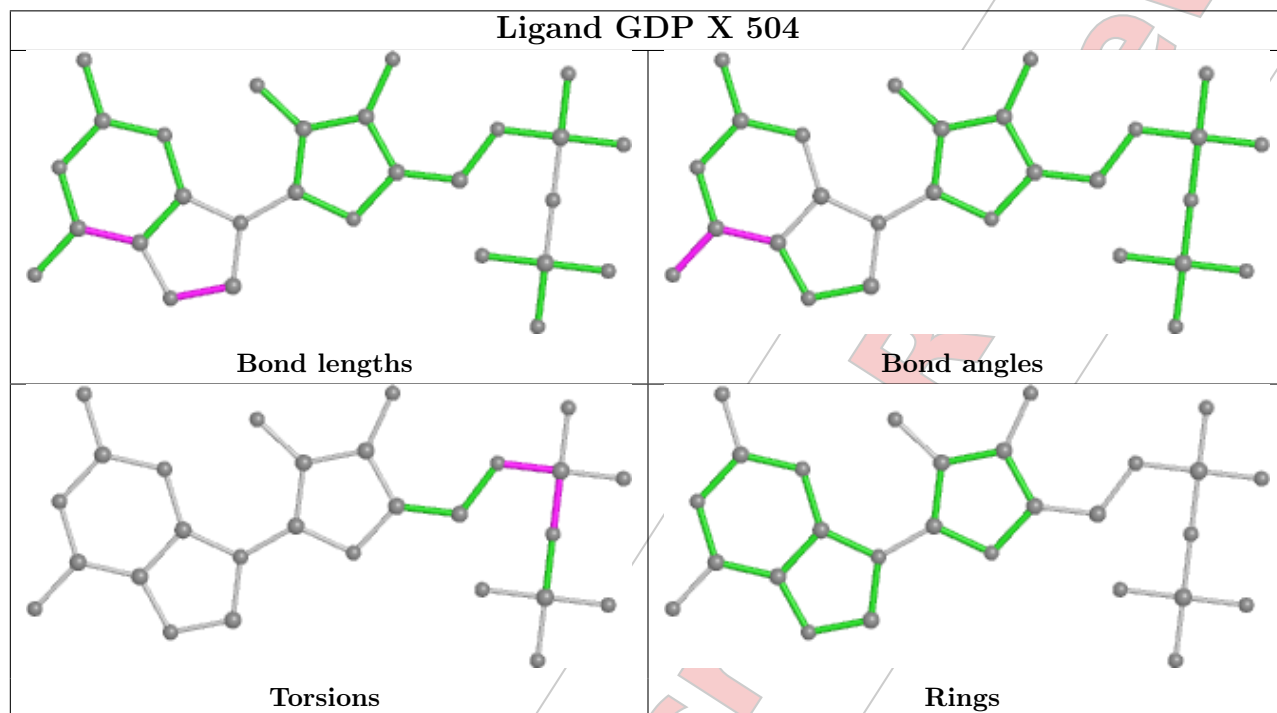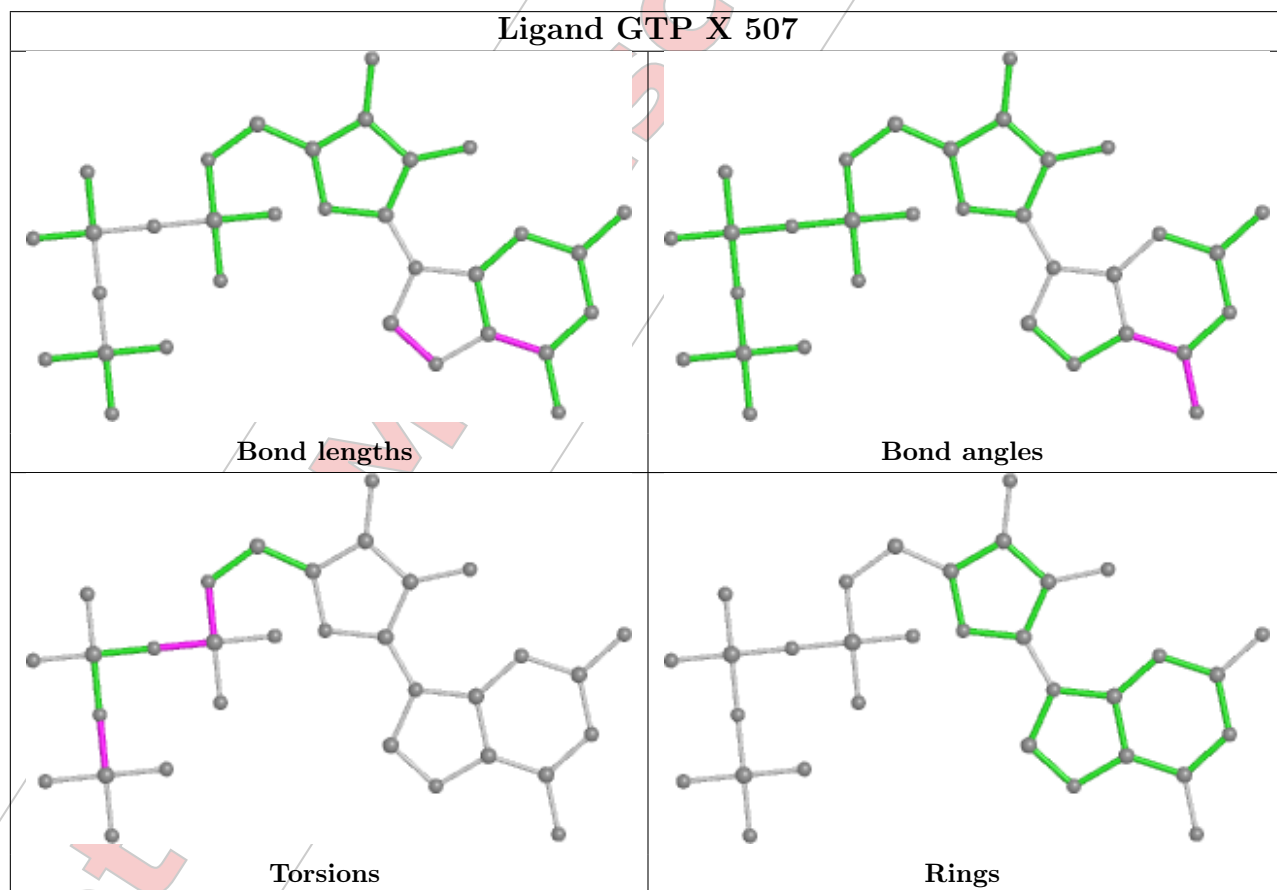

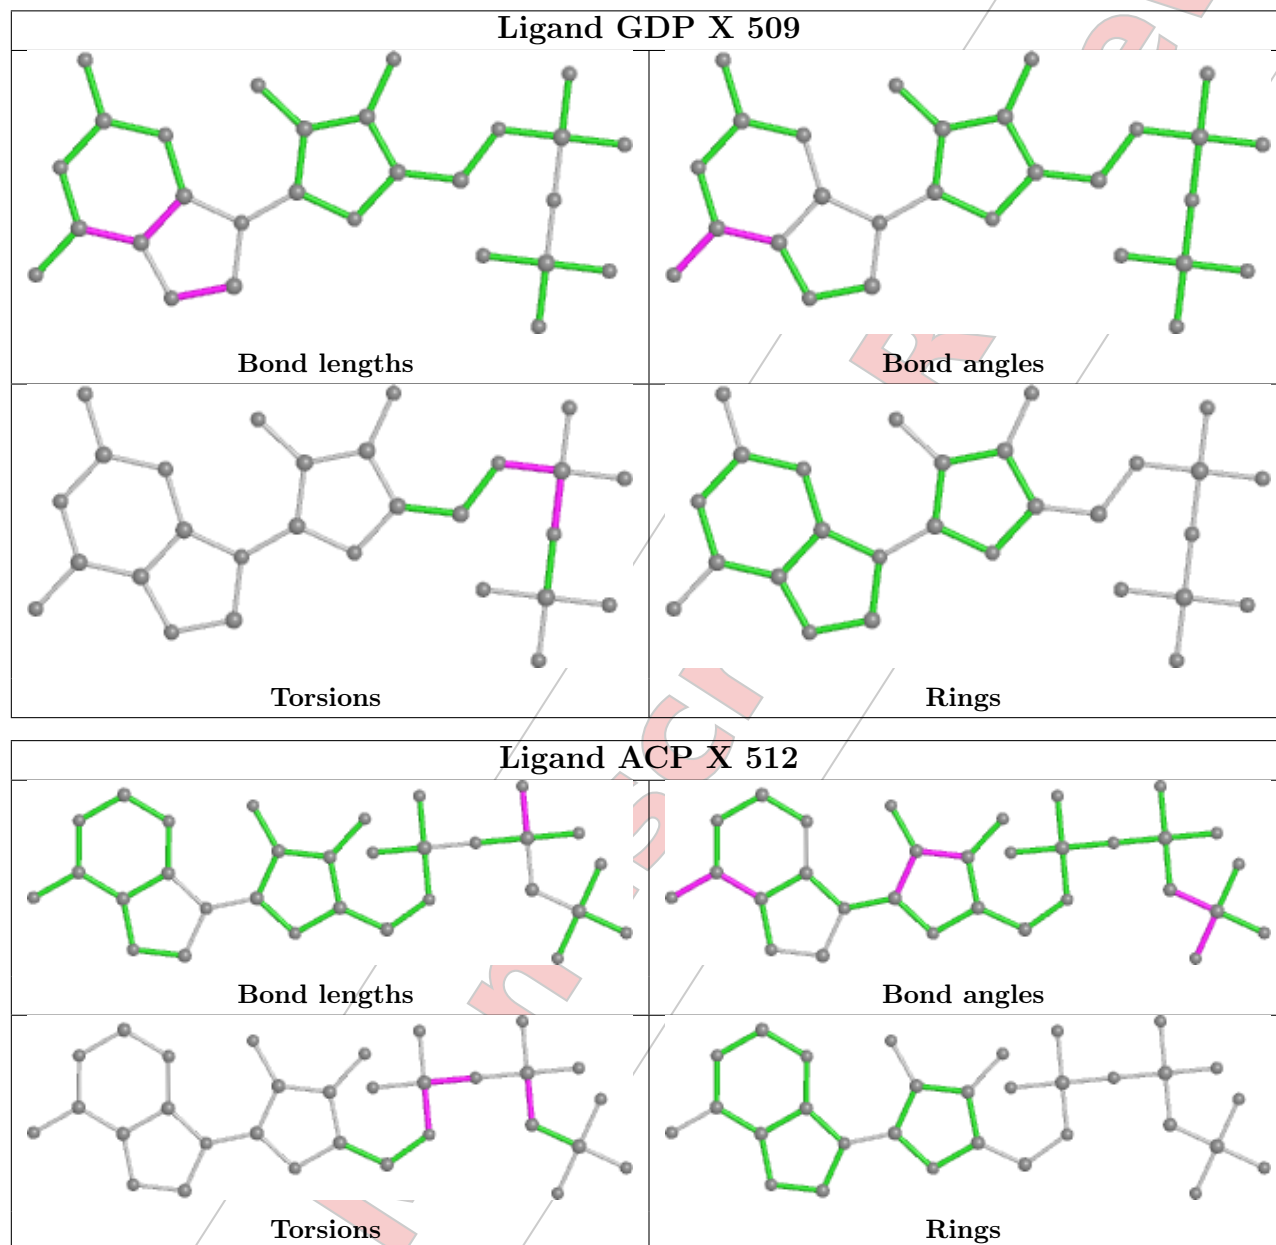

### 5.7 Other polymers [i](#)

There are no such residues in this entry.

### 5.8 Polymer linkage issues [i](#)

The following chains have linkage breaks:

| Mol | Chain | Number of breaks |
|-----|-------|------------------|
| 6   | F     | 6                |
| 5   | E     | 1                |

*Continued on next page...*

Continued from previous page...

| Mol | Chain | Number of breaks |
|-----|-------|------------------|
| 4   | D     | 1                |
| 2   | B     | 1                |

All chain breaks are listed below:

| Model | Chain | Residue-1 | Atom-1 | Residue-2 | Atom-2 | Distance (Å) |
|-------|-------|-----------|--------|-----------|--------|--------------|
| 1     | E     | 28:SER    | C      | 44:ASP    | N      | 32.70        |
| 1     | F     | 362:ALA   | C      | 373:SER   | N      | 19.68        |
| 1     | F     | 102:PRO   | C      | 125:THR   | N      | 12.42        |
| 1     | F     | 151:SER   | C      | 162:ILE   | N      | 11.70        |
| 1     | D     | 275:LEU   | C      | 286:LEU   | N      | 11.66        |
| 1     | F     | 136:ASN   | C      | 144:GLY   | N      | 11.08        |
| 1     | B     | 276:THR   | C      | 282:GLN   | N      | 8.40         |
| 1     | F     | 173:ILE   | C      | 179:VAL   | N      | 8.40         |
| 1     | F     | 231:ALA   | C      | 235:ASP   | N      | 6.52         |

## 6 Fit of model and data [\(i\)](#)

### 6.1 Protein, DNA and RNA chains [\(i\)](#)

Unable to reproduce the depositors R factor - this section is therefore empty.

### 6.2 Non-standard residues in protein, DNA, RNA chains [\(i\)](#)

Unable to reproduce the depositors R factor - this section is therefore empty.

### 6.3 Carbohydrates [\(i\)](#)

Unable to reproduce the depositors R factor - this section is therefore empty.

### 6.4 Ligands [\(i\)](#)

Unable to reproduce the depositors R factor - this section is therefore empty.

The following is a graphical depiction of the model fit to experimental electron density of all instances of the Ligand of Interest. In addition, ligands with molecular weight > 250 and outliers as shown on the geometry validation Tables will also be included. Each fit is shown from different orientation to approximate a three-dimensional view.

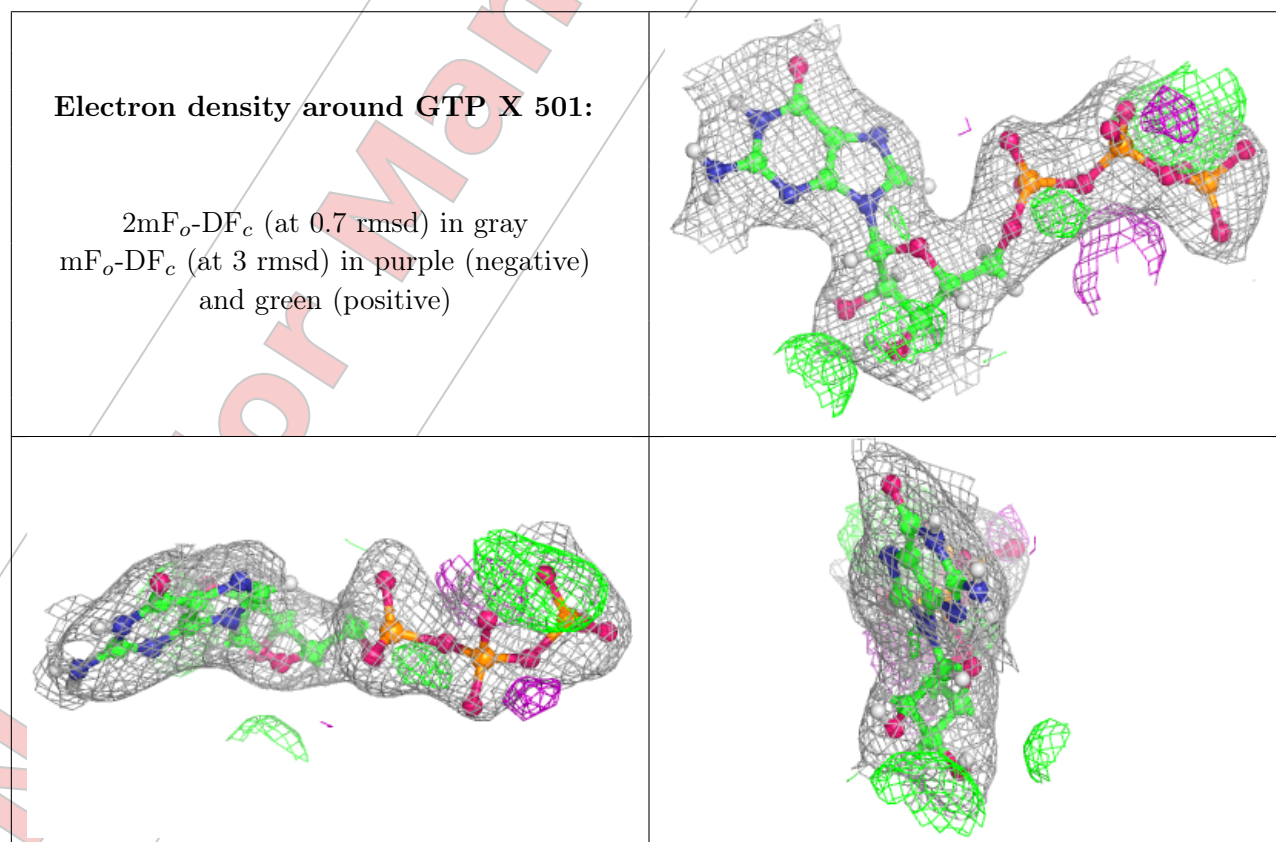

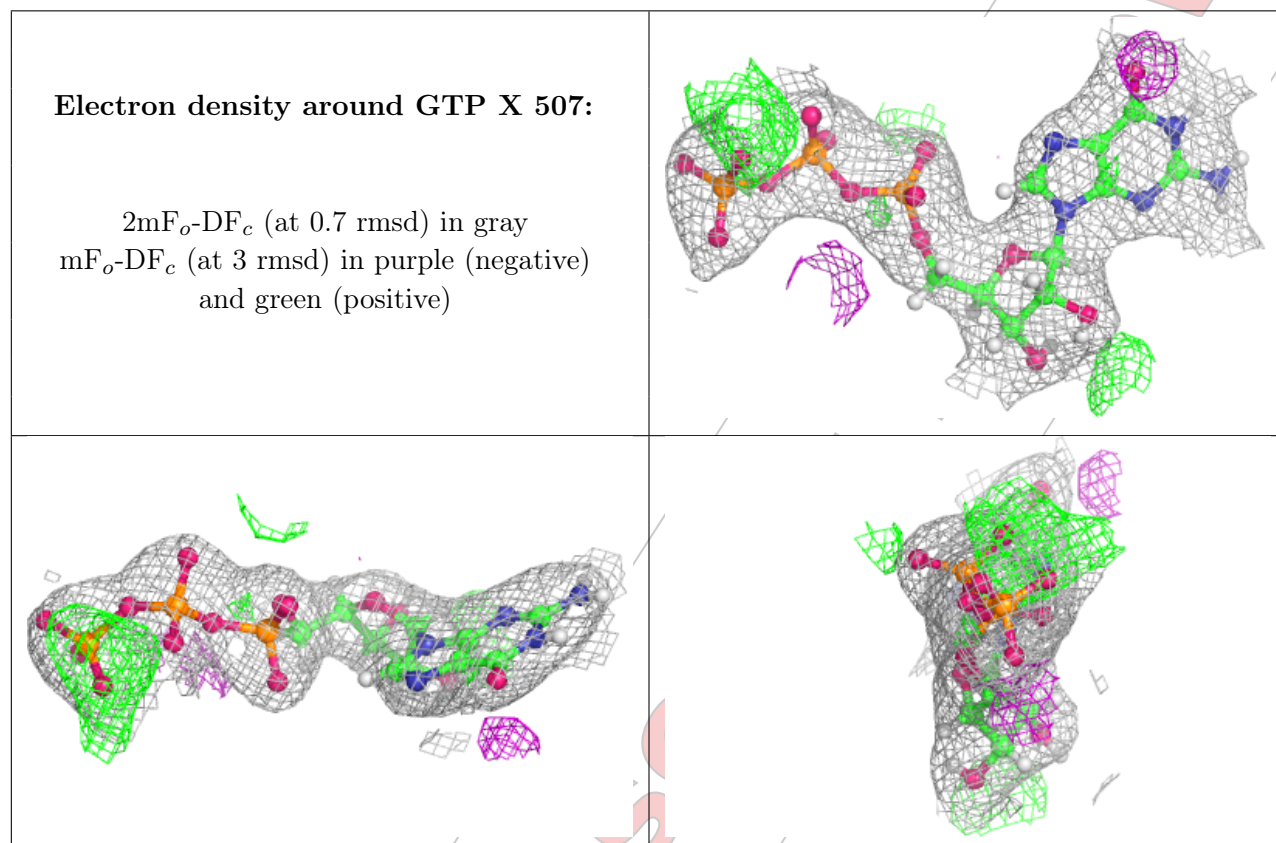

Not For Manuscript

**Electron density around GDP X 504:**

$2mF_o-DF_c$  (at 0.7 rmsd) in gray  
 $mF_o-DF_c$  (at 3 rmsd) in purple (negative)  
and green (positive)

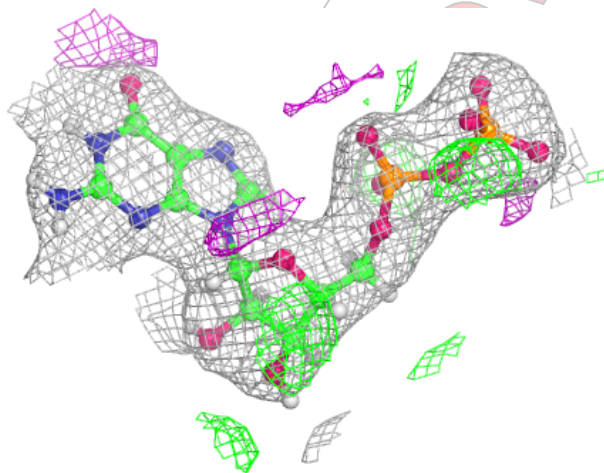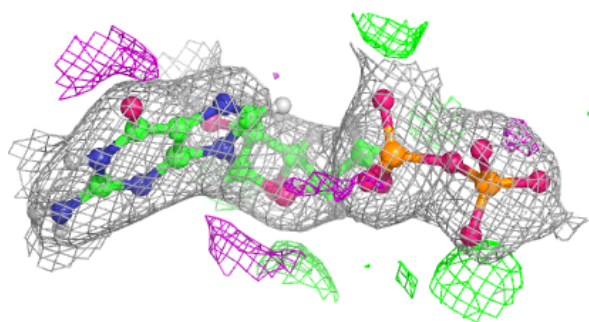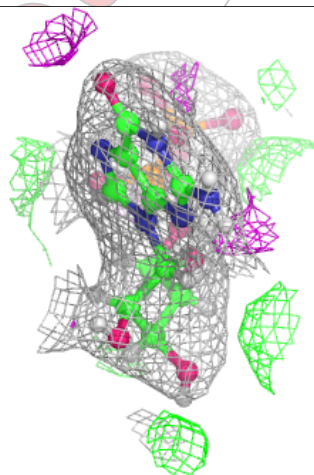

Not For Manuscript

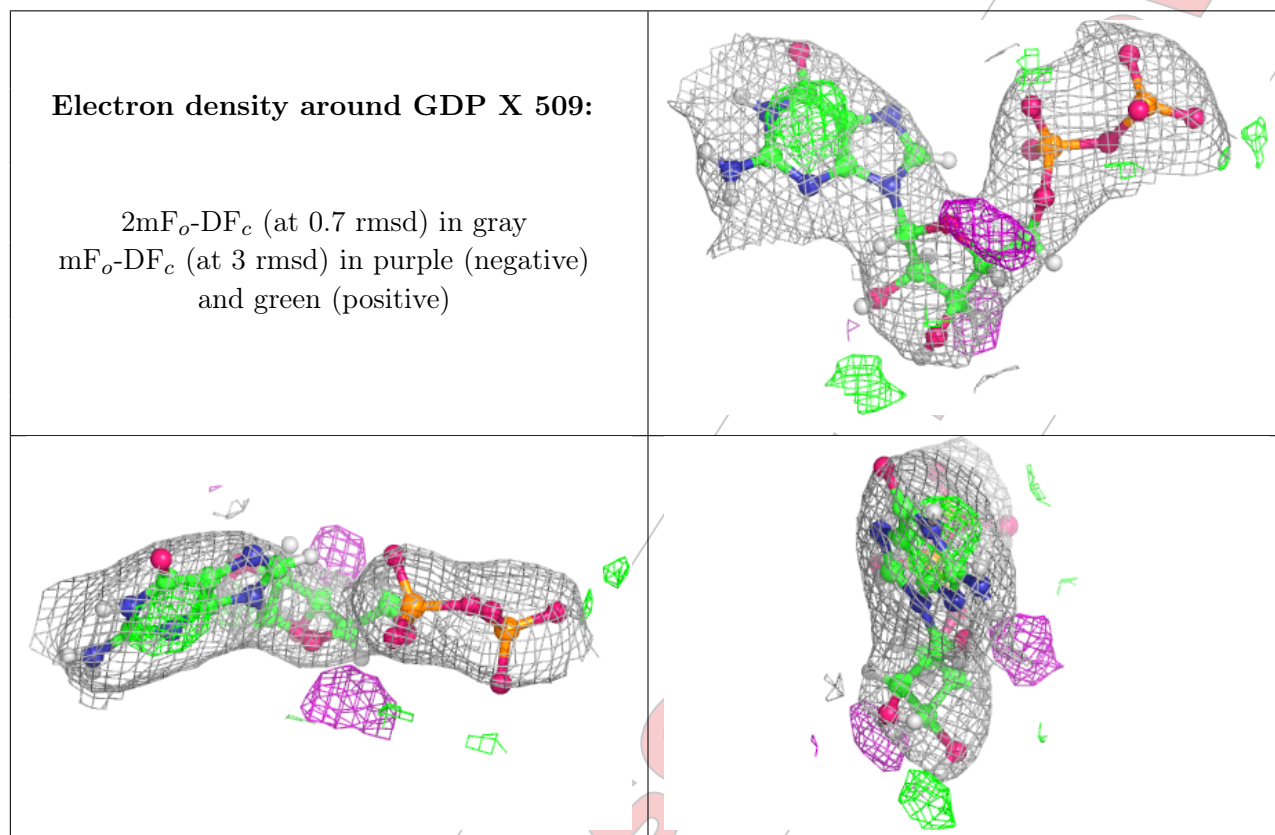

Not For Manuscript

**Electron density around COL X 506:**

$2mF_o-DF_c$  (at 0.7 rmsd) in gray  
 $mF_o-DF_c$  (at 3 rmsd) in purple (negative)  
and green (positive)

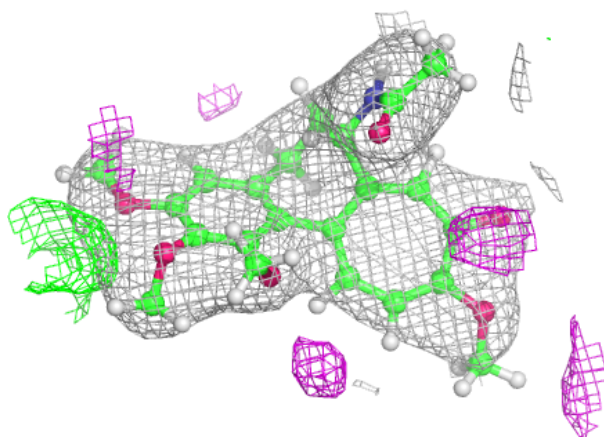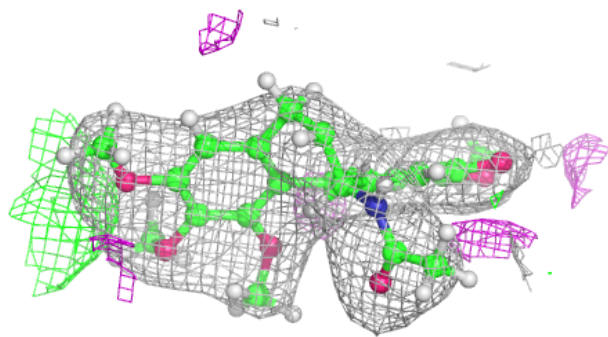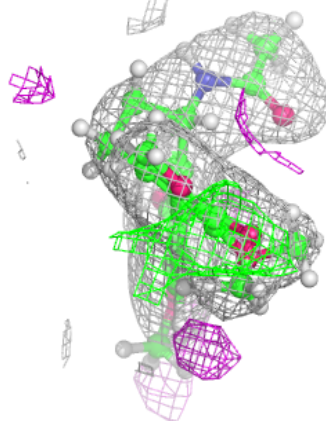

Not For Manuscript

**Electron density around COL X 511:**

$2mF_o-DF_c$  (at 0.7 rmsd) in gray  
 $mF_o-DF_c$  (at 3 rmsd) in purple (negative)  
and green (positive)

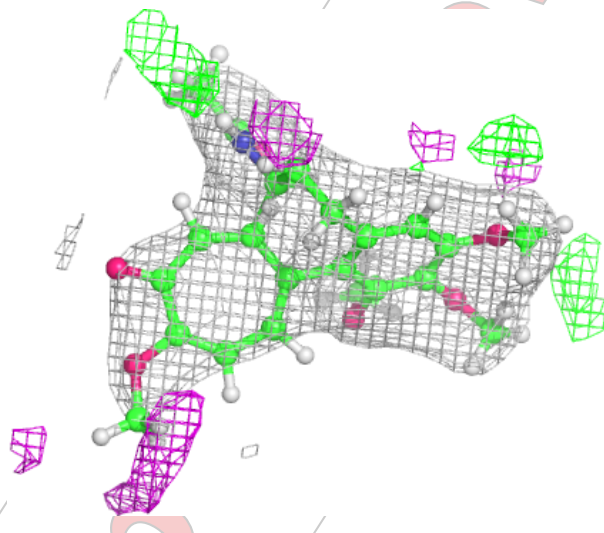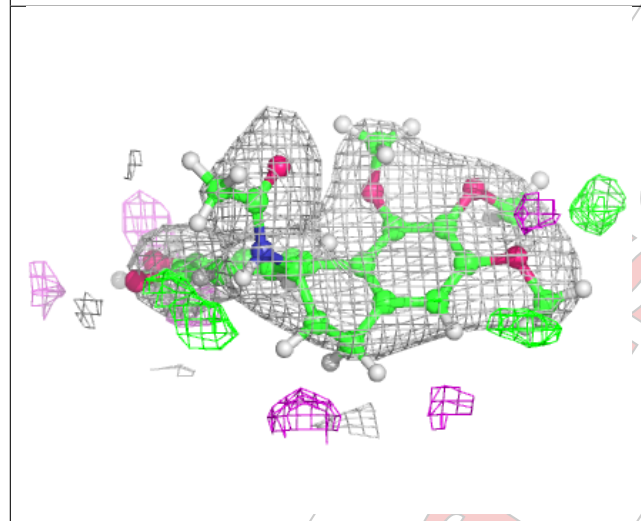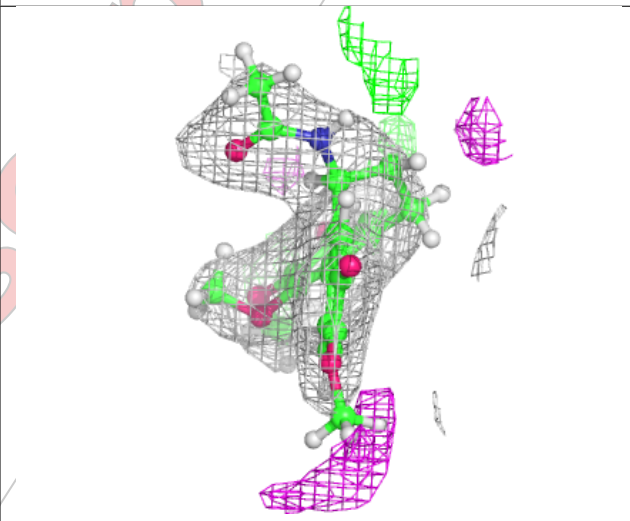

Not For Ma

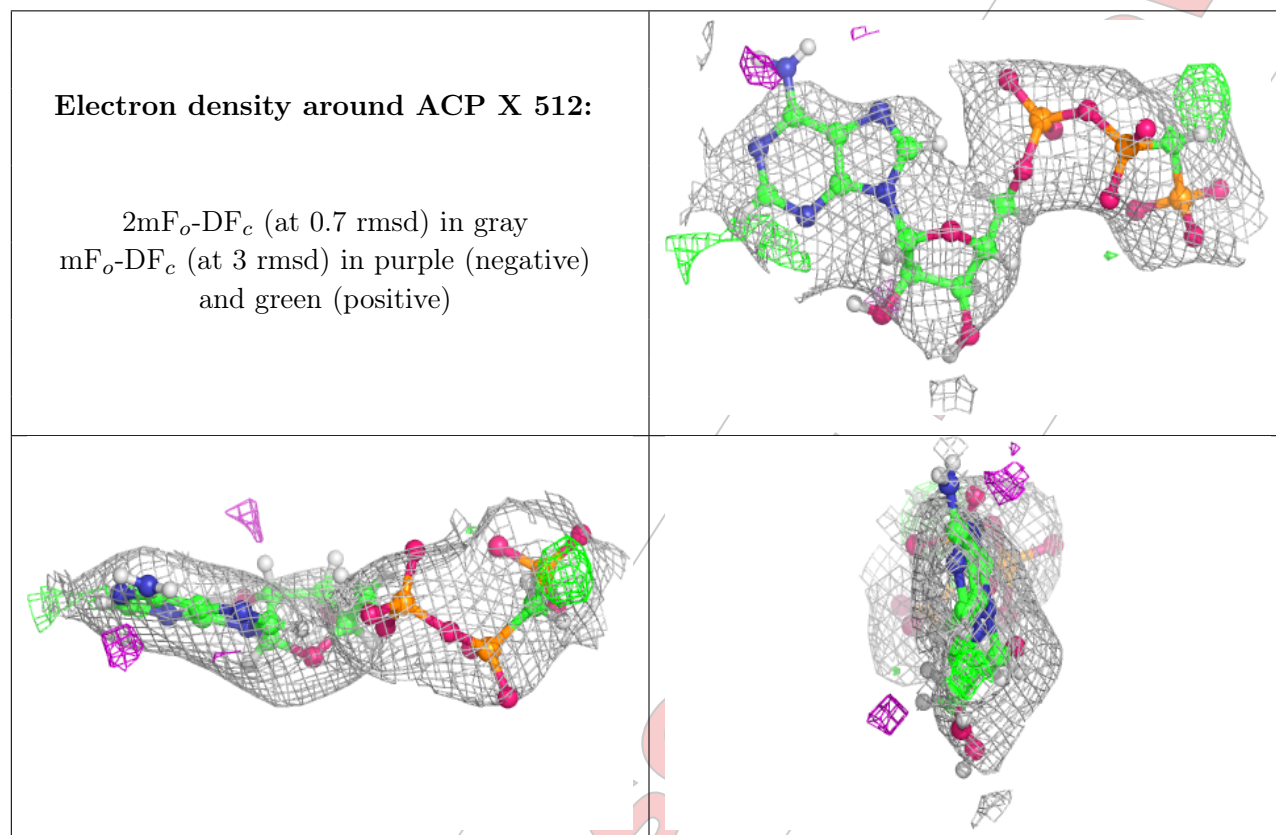

## 6.5 Other polymers [i](#)

Unable to reproduce the depositor's R factor - this section is therefore empty.



# Preliminary Full wwPDB X-ray Structure Validation Report ⓘ

Feb 15, 2023 – 06:12 pm GMT

Deposition ID : D\_1292128578

**This wwPDB validation report is NOT for manuscript review**

This is a Preliminary Full wwPDB X-ray Structure Validation Report.

This report is produced by the wwPDB Deposition System during initial deposition but before annotation of the structure.

We welcome your comments at [validation@mail.wwpdb.org](mailto:validation@mail.wwpdb.org)

A user guide is available at

<https://www.wwpdb.org/validation/2017/XrayValidationReportHelp>

with specific help available everywhere you see the ⓘ symbol.

The types of validation reports are described at

<http://www.wwpdb.org/validation/2017/FAQs#types>.

---

The following versions of software and data (see [references ⓘ](#)) were used in the production of this report:

|                                |   |                                                                    |
|--------------------------------|---|--------------------------------------------------------------------|
| MolProbity                     | : | 4.02b-467                                                          |
| Mogul                          | : | 1.8.4, CSD as541be (2020)                                          |
| Xtriage (Phenix)               | : | 1.13                                                               |
| EDS                            | : | 2.32.1                                                             |
| buster-report                  | : | 1.1.7 (2018)                                                       |
| Percentile statistics          | : | 20191225.v01 (using entries in the PDB archive December 25th 2019) |
| Refmac                         | : | 5.8.0158                                                           |
| CCP4                           | : | 7.0.044 (Gargrove)                                                 |
| Ideal geometry (proteins)      | : | Engh & Huber (2001)                                                |
| Ideal geometry (DNA, RNA)      | : | Parkinson et al. (1996)                                            |
| Validation Pipeline (wwPDB-VP) | : | 2.32.1                                                             |

# 1 Overall quality at a glance i

The following experimental techniques were used to determine the structure:

*X-RAY DIFFRACTION*

The reported resolution of this entry is 2.70 Å.

Percentile scores (ranging between 0-100) for global validation metrics of the entry are shown in the following graphic. The table shows the number of entries on which the scores are based.

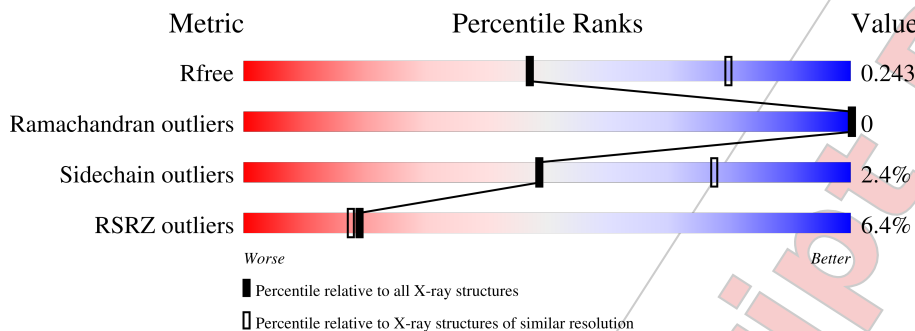

| Metric                | Whole archive (#Entries) | Similar resolution (#Entries, resolution range(Å)) |
|-----------------------|--------------------------|----------------------------------------------------|
| $R_{free}$            | 130704                   | 2808 (2.70-2.70)                                   |
| Ramachandran outliers | 138981                   | 3069 (2.70-2.70)                                   |
| Sidechain outliers    | 138945                   | 3069 (2.70-2.70)                                   |
| RSRZ outliers         | 127900                   | 2737 (2.70-2.70)                                   |

The table below summarises the geometric issues observed across the polymeric chains and their fit to the electron density. The red, orange, yellow and green segments of the lower bar indicate the fraction of residues that contain outliers for  $\geq 3$ , 2, 1 and 0 types of geometric quality criteria respectively. A grey segment represents the fraction of residues that are not modelled. The numeric value for each fraction is indicated below the corresponding segment, with a dot representing fractions  $\leq 5\%$ . The upper red bar (where present) indicates the fraction of residues that have poor fit to the electron density. The numeric value is given above the bar.

| Mol | Chain | Length | Quality of chain |
|-----|-------|--------|------------------|
| 1   | A     | 439    | 4%<br>99%        |
| 2   | B     | 425    | 4%<br>99%        |
| 3   | C     | 440    | %<br>98%         |
| 4   | D     | 427    | 6%<br>98%        |
| 5   | E     | 123    | 11%<br>97%       |
| 6   | F     | 332    | 17%<br>95%<br>5% |

## 2 Entry composition [i](#)

There are 12 unique types of molecules in this entry. The entry contains 17569 atoms, of which 0 are hydrogens and 0 are deuteriums.

In the tables below, the ZeroOcc column contains the number of atoms modelled with zero occupancy, the AltConf column contains the number of residues with at least one atom in alternate conformation and the Trace column contains the number of residues modelled with at most 2 atoms.

- Molecule 1 is a protein.

| Mol | Chain | Residues | Atoms |      |     |     |    | ZeroOcc | AltConf | Trace |
|-----|-------|----------|-------|------|-----|-----|----|---------|---------|-------|
|     |       |          | Total | C    | N   | O   | S  |         |         |       |
| 1   | A     | 439      | 3436  | 2173 | 584 | 656 | 23 | 0       | 1       | 0     |

- Molecule 2 is a protein.

| Mol | Chain | Residues | Atoms |      |     |     |    | ZeroOcc | AltConf | Trace |
|-----|-------|----------|-------|------|-----|-----|----|---------|---------|-------|
|     |       |          | Total | C    | N   | O   | S  |         |         |       |
| 2   | B     | 425      | 3360  | 2111 | 574 | 649 | 26 | 2       | 2       | 0     |

- Molecule 3 is a protein.

| Mol | Chain | Residues | Atoms |      |     |     |    | ZeroOcc | AltConf | Trace |
|-----|-------|----------|-------|------|-----|-----|----|---------|---------|-------|
|     |       |          | Total | C    | N   | O   | S  |         |         |       |
| 3   | C     | 440      | 3440  | 2177 | 584 | 656 | 23 | 0       | 1       | 0     |

- Molecule 4 is a protein.

| Mol | Chain | Residues | Atoms |      |     |     |    | ZeroOcc | AltConf | Trace |
|-----|-------|----------|-------|------|-----|-----|----|---------|---------|-------|
|     |       |          | Total | C    | N   | O   | S  |         |         |       |
| 4   | D     | 427      | 3358  | 2107 | 574 | 651 | 26 | 2       | 1       | 0     |

- Molecule 5 is a protein.

| Mol | Chain | Residues | Atoms |     |     |     |   | ZeroOcc | AltConf | Trace |
|-----|-------|----------|-------|-----|-----|-----|---|---------|---------|-------|
|     |       |          | Total | C   | N   | O   | S |         |         |       |
| 5   | E     | 123      | 1014  | 625 | 183 | 201 | 5 | 0       | 0       | 0     |

- Molecule 6 is a protein.

| Mol | Chain | Residues | Atoms |      |     |     |    | ZeroOcc | AltConf | Trace |
|-----|-------|----------|-------|------|-----|-----|----|---------|---------|-------|
|     |       |          | Total | C    | N   | O   | S  |         |         |       |
| 6   | F     | 332      | 2714  | 1740 | 464 | 495 | 15 | 0       | 1       | 0     |

- Molecule 7 is GUANOSINE-5'-TRIPHOSPHATE (three-letter code: GTP) (formula:  $C_{10}H_{16}N_5O_{14}P_3$ ).

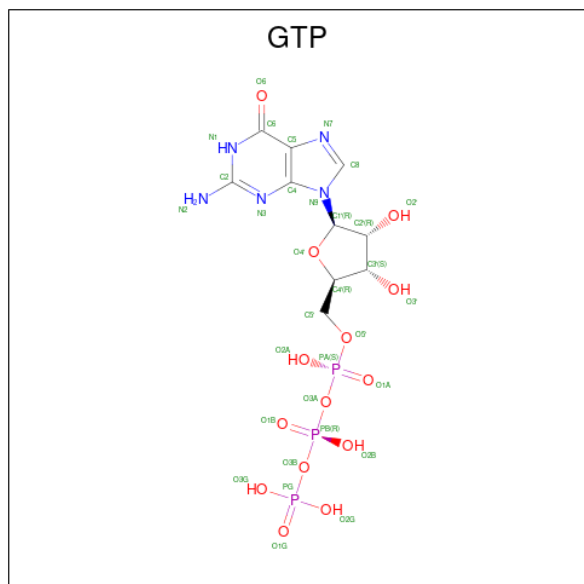

| Mol | Chain | Residues | Atoms |    |   |    |   | ZeroOcc | AltConf |
|-----|-------|----------|-------|----|---|----|---|---------|---------|
|     |       |          | Total | C  | N | O  | P |         |         |
| 7   | A     | 1        | 32    | 10 | 5 | 14 | 3 | 0       | 0       |
| 7   | C     | 1        | 32    | 10 | 5 | 14 | 3 | 0       | 0       |

- Molecule 8 is MAGNESIUM ION (three-letter code: MG) (formula: Mg).

| Mol | Chain | Residues | Atoms |    | ZeroOcc | AltConf |
|-----|-------|----------|-------|----|---------|---------|
|     |       |          | Total | Mg |         |         |
| 8   | A     | 1        | 1     | 1  | 0       | 0       |
| 8   | B     | 1        | 1     | 1  | 0       | 0       |
| 8   | C     | 1        | 1     | 1  | 0       | 0       |

- Molecule 9 is CALCIUM ION (three-letter code: CA) (formula: Ca).

| Mol | Chain | Residues | Atoms |    | ZeroOcc | AltConf |
|-----|-------|----------|-------|----|---------|---------|
|     |       |          | Total | Ca |         |         |
| 9   | A     | 1        | 1     | 1  | 0       | 0       |

Continued on next page...

Continued from previous page...

| Mol | Chain | Residues | Atoms           | ZeroOcc | AltConf |
|-----|-------|----------|-----------------|---------|---------|
| 9   | C     | 1        | Total Ca<br>1 1 | 0       | 0       |

- Molecule 10 is GUANOSINE-5'-DIPHOSPHATE (three-letter code: GDP) (formula:  $C_{10}H_{15}N_5O_{11}P_2$ ).

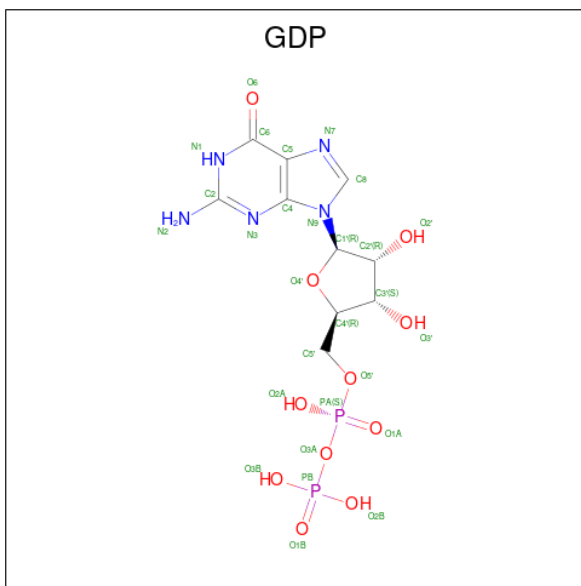

| Mol | Chain | Residues | Atoms |    |   |    | ZeroOcc | AltConf |   |
|-----|-------|----------|-------|----|---|----|---------|---------|---|
|     |       |          | Total | C  | N | O  |         |         | P |
| 10  | B     | 1        | 28    | 10 | 5 | 11 | 2       | 0       | 0 |
| 10  | D     | 1        | 28    | 10 | 5 | 11 | 2       | 0       | 0 |

- Molecule 11 is PHOSPHOMETHYLPHOSPHONIC ACID ADENYLATE ESTER (three-letter code: ACP) (formula:  $C_{11}H_{18}N_5O_{12}P_3$ ).

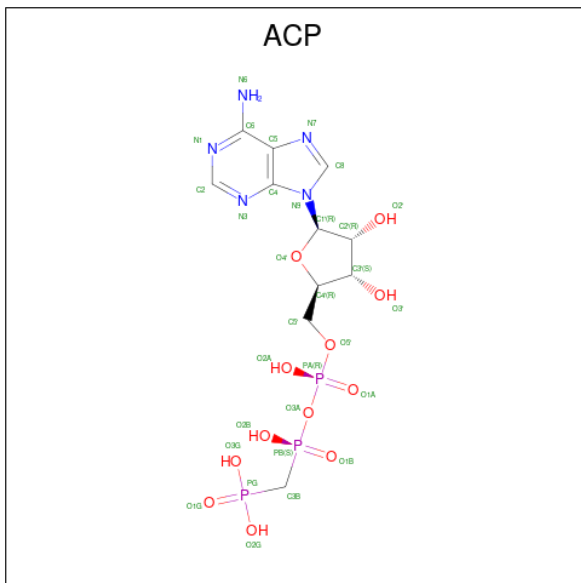

| Mol | Chain | Residues | Atoms |    |   |    | ZeroOcc | AltConf |   |
|-----|-------|----------|-------|----|---|----|---------|---------|---|
|     |       |          | Total | C  | N | O  |         |         | P |
| 11  | F     | 1        | 31    | 11 | 5 | 12 | 3       | 0       | 0 |

- Molecule 12 is water.

| Mol | Chain | Residues | Atoms |    | ZeroOcc | AltConf |
|-----|-------|----------|-------|----|---------|---------|
|     |       |          | Total | O  |         |         |
| 12  | S     | 91       | 91    | 91 | 0       | 0       |

### 3 Residue-property plots

These plots are drawn for all protein, RNA, DNA and oligosaccharide chains in the entry. The first graphic for a chain summarises the proportions of the various outlier classes displayed in the second graphic. The second graphic shows the sequence view annotated by issues in geometry and electron density. Residues are color-coded according to the number of geometric quality criteria for which they contain at least one outlier: green = 0, yellow = 1, orange = 2 and red = 3 or more. A red dot above a residue indicates a poor fit to the electron density ( $RSRZ > 2$ ). Stretches of 2 or more consecutive residues without any outlier are shown as a green connector. Residues present in the sample, but not in the model, are shown in grey.

- Molecule 1:

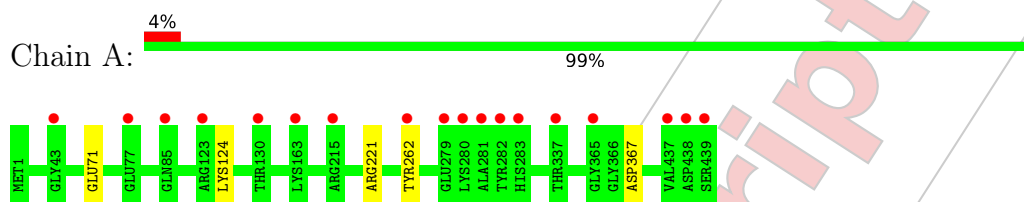

- Molecule 2:

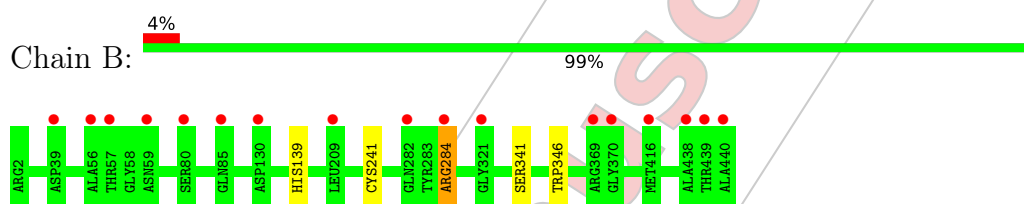

- Molecule 3:

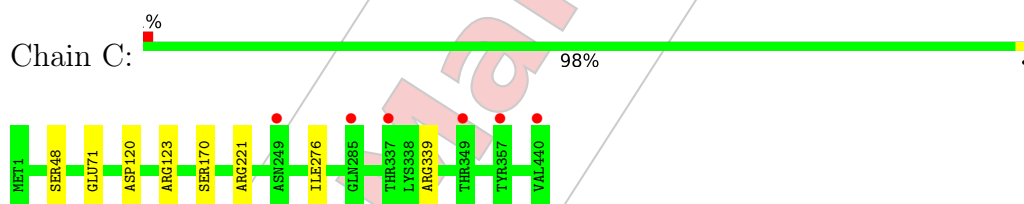

- Molecule 4:

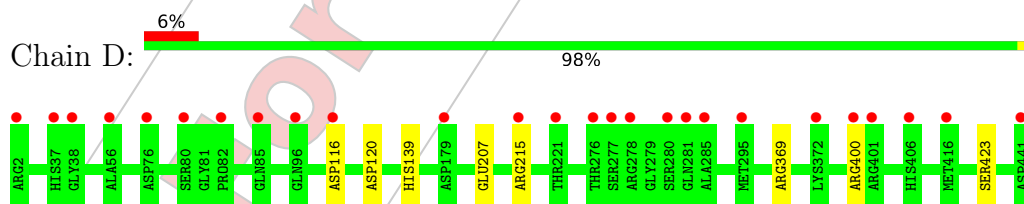

- Molecule 5:

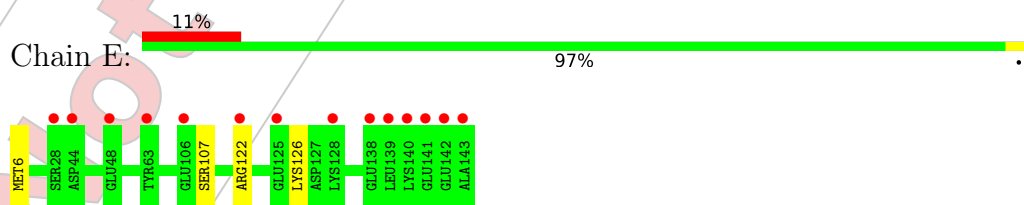

• Molecule 6:

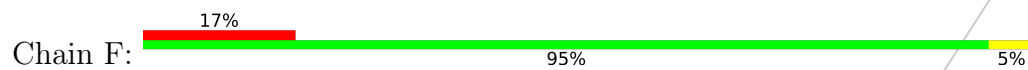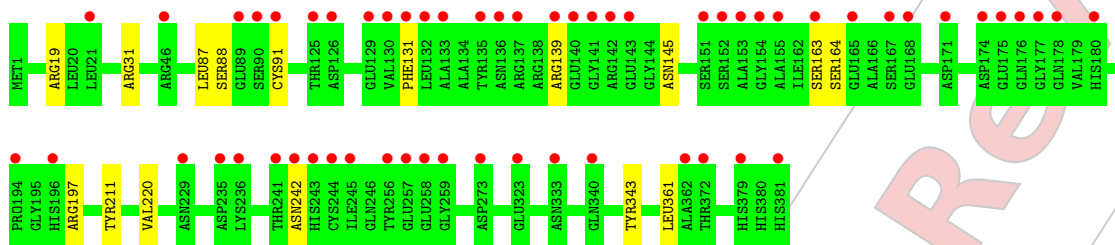

Not For Manuscript Review

## 4 Data and refinement statistics i

| Property                                                                | Value                                                       | Source           |
|-------------------------------------------------------------------------|-------------------------------------------------------------|------------------|
| Space group                                                             | P 21 21 21                                                  | Depositor        |
| Cell constants<br>a, b, c, $\alpha$ , $\beta$ , $\gamma$                | 106.53Å 160.48Å 181.24Å<br>90.00° 90.00° 90.00°             | Depositor        |
| Resolution (Å)                                                          | 15.20 – 2.70<br>15.20 – 2.70                                | Depositor<br>EDS |
| % Data completeness<br>(in resolution range)                            | 99.9 (15.20-2.70)<br>99.9 (15.20-2.70)                      | Depositor<br>EDS |
| $R_{merge}$                                                             | (Not available)                                             | Depositor        |
| $R_{sym}$                                                               | (Not available)                                             | Depositor        |
| $\langle I/\sigma(I) \rangle$ <sup>1</sup>                              | 1.27 (at 2.69Å)                                             | Xtrriage         |
| Refinement program                                                      | .                                                           | Depositor        |
| R, $R_{free}$                                                           | 0.186 , 0.234<br>0.198 , 0.243                              | Depositor<br>DCC |
| $R_{free}$ test set                                                     | 627 reflections (0.74%)                                     | wwPDB-VP         |
| Wilson B-factor (Å <sup>2</sup> )                                       | 66.6                                                        | Xtrriage         |
| Anisotropy                                                              | 0.008                                                       | Xtrriage         |
| Bulk solvent $k_{sol}$ (e/Å <sup>3</sup> ), $B_{sol}$ (Å <sup>2</sup> ) | 0.35 , 79.4                                                 | EDS              |
| L-test for twinning <sup>2</sup>                                        | $\langle  L  \rangle = 0.50$ , $\langle L^2 \rangle = 0.33$ | Xtrriage         |
| Estimated twinning fraction                                             | No twinning to report.                                      | Xtrriage         |
| $F_o, F_c$ correlation                                                  | 0.95                                                        | EDS              |
| Total number of atoms                                                   | 17569                                                       | wwPDB-VP         |
| Average B, all atoms (Å <sup>2</sup> )                                  | 78.0                                                        | wwPDB-VP         |

Xtrriage's analysis on translational NCS is as follows: *The largest off-origin peak in the Patterson function is 2.58% of the height of the origin peak. No significant pseudotranslation is detected.*

<sup>1</sup>Intensities estimated from amplitudes.

<sup>2</sup>Theoretical values of  $\langle |L| \rangle$ ,  $\langle L^2 \rangle$  for acentric reflections are 0.5, 0.333 respectively for untwinned datasets, and 0.375, 0.2 for perfectly twinned datasets.

## 5 Model quality [i](#)

### 5.1 Standard geometry [i](#)

Bond lengths and bond angles in the following residue types are not validated in this section: CA, ACP, GTP, MG, GDP

The Z score for a bond length (or angle) is the number of standard deviations the observed value is removed from the expected value. A bond length (or angle) with  $|Z| > 5$  is considered an outlier worth inspection. RMSZ is the root-mean-square of all Z scores of the bond lengths (or angles).

| Mol | Chain | Bond lengths |         | Bond angles |         |
|-----|-------|--------------|---------|-------------|---------|
|     |       | RMSZ         | # Z  >5 | RMSZ        | # Z  >5 |
| 1   | A     | 0.30         | 0/3514  | 0.50        | 0/4770  |
| 2   | B     | 0.28         | 0/3437  | 0.48        | 0/4655  |
| 3   | C     | 0.26         | 0/3521  | 0.47        | 0/4780  |
| 4   | D     | 0.27         | 0/3431  | 0.47        | 0/4645  |
| 5   | E     | 0.23         | 0/1022  | 0.41        | 0/1356  |
| 6   | F     | 0.27         | 0/2777  | 0.49        | 0/3750  |
| All | All   | 0.27         | 0/17702 | 0.48        | 0/23956 |

Chiral center outliers are detected by calculating the chiral volume of a chiral center and verifying if the center is modelled as a planar moiety or with the opposite hand. A planarity outlier is detected by checking planarity of atoms in a peptide group, atoms in a mainchain group or atoms of a sidechain that are expected to be planar.

| Mol | Chain | #Chirality outliers | #Planarity outliers |
|-----|-------|---------------------|---------------------|
| 2   | B     | 0                   | 1                   |
| 3   | C     | 0                   | 1                   |
| All | All   | 0                   | 2                   |

There are no bond length outliers.

There are no bond angle outliers.

There are no chirality outliers.

All (2) planarity outliers are listed below:

| Mol | Chain | Res | Type | Group     |
|-----|-------|-----|------|-----------|
| 2   | B     | 284 | ARG  | Sidechain |
| 3   | C     | 221 | ARG  | Sidechain |

## 5.2 Too-close contacts [i](#)

In the following table, the Non-H and H(model) columns list the number of non-hydrogen atoms and hydrogen atoms in the chain respectively. The H(added) column lists the number of hydrogen atoms added and optimized by MolProbity. The Clashes column lists the number of clashes within the asymmetric unit, whereas Symm-Clashes lists symmetry-related clashes.

| Mol | Chain | Non-H | H(model) | H(added) | Clashes | Symm-Clashes |
|-----|-------|-------|----------|----------|---------|--------------|
| 1   | A     | 3436  | 0        | 3343     | 0       | 0            |
| 2   | B     | 3360  | 0        | 3238     | 0       | 0            |
| 3   | C     | 3440  | 0        | 3353     | 0       | 0            |
| 4   | D     | 3358  | 0        | 3232     | 0       | 0            |
| 5   | E     | 1014  | 0        | 1029     | 0       | 0            |
| 6   | F     | 2714  | 0        | 2682     | 0       | 0            |
| 7   | A     | 32    | 0        | 12       | 0       | 0            |
| 7   | C     | 32    | 0        | 12       | 0       | 0            |
| 8   | A     | 1     | 0        | 0        | 0       | 0            |
| 8   | B     | 1     | 0        | 0        | 0       | 0            |
| 8   | C     | 1     | 0        | 0        | 0       | 0            |
| 9   | A     | 1     | 0        | 0        | 0       | 0            |
| 9   | C     | 1     | 0        | 0        | 0       | 0            |
| 10  | B     | 28    | 0        | 12       | 0       | 0            |
| 10  | D     | 28    | 0        | 12       | 0       | 0            |
| 11  | F     | 31    | 0        | 14       | 0       | 0            |
| 12  | S     | 91    | 0        | 0        | 0       | 0            |
| All | All   | 17569 | 0        | 16939    | 0       | 0            |

The all-atom clashscore is defined as the number of clashes found per 1000 atoms (including hydrogen atoms). Clashscore could not be calculated for this entry.

There are no clashes within the asymmetric unit.

There are no symmetry-related clashes.

## 5.3 Torsion angles [i](#)

### 5.3.1 Protein backbone [i](#)

In the following table, the Percentiles column shows the percent Ramachandran outliers of the chain as a percentile score with respect to all X-ray entries followed by that with respect to entries of similar resolution.

The Analysed column shows the number of residues for which the backbone conformation was analysed, and the total number of residues.

| Mol | Chain | Analysed        | Favoured   | Allowed | Outliers | Percentiles |     |
|-----|-------|-----------------|------------|---------|----------|-------------|-----|
| 1   | A     | 438/439 (100%)  | 423 (97%)  | 15 (3%) | 0        | 100         | 100 |
| 2   | B     | 423/425 (100%)  | 409 (97%)  | 14 (3%) | 0        | 100         | 100 |
| 3   | C     | 439/440 (100%)  | 425 (97%)  | 14 (3%) | 0        | 100         | 100 |
| 4   | D     | 423/427 (99%)   | 406 (96%)  | 17 (4%) | 0        | 100         | 100 |
| 5   | E     | 119/123 (97%)   | 117 (98%)  | 2 (2%)  | 0        | 100         | 100 |
| 6   | F     | 321/332 (97%)   | 302 (94%)  | 19 (6%) | 0        | 100         | 100 |
| All | All   | 2163/2186 (99%) | 2082 (96%) | 81 (4%) | 0        | 100         | 100 |

There are no Ramachandran outliers to report.

### 5.3.2 Protein sidechains [i](#)

In the following table, the Percentiles column shows the percent sidechain outliers of the chain as a percentile score with respect to all X-ray entries followed by that with respect to entries of similar resolution.

The Analysed column shows the number of residues for which the sidechain conformation was analysed, and the total number of residues.

| Mol | Chain | Analysed         | Rotameric  | Outliers | Percentiles |    |
|-----|-------|------------------|------------|----------|-------------|----|
| 1   | A     | 371/370 (100%)   | 366 (99%)  | 5 (1%)   | 69          | 87 |
| 2   | B     | 369/367 (100%)   | 364 (99%)  | 5 (1%)   | 67          | 86 |
| 3   | C     | 372/371 (100%)   | 365 (98%)  | 7 (2%)   | 57          | 82 |
| 4   | D     | 367/368 (100%)   | 359 (98%)  | 8 (2%)   | 52          | 79 |
| 5   | E     | 110/110 (100%)   | 106 (96%)  | 4 (4%)   | 35          | 64 |
| 6   | F     | 298/297 (100%)   | 282 (95%)  | 16 (5%)  | 22          | 47 |
| All | All   | 1887/1883 (100%) | 1842 (98%) | 45 (2%)  | 49          | 77 |

All (45) residues with a non-rotameric sidechain are listed below:

| Mol | Chain | Res | Type |
|-----|-------|-----|------|
| 1   | A     | 71  | GLU  |
| 1   | A     | 124 | LYS  |
| 1   | A     | 221 | ARG  |
| 1   | A     | 262 | TYR  |
| 1   | A     | 367 | ASP  |
| 2   | B     | 139 | HIS  |
| 2   | B     | 241 | CYS  |

Continued on next page...

Continued from previous page...

| Mol | Chain | Res | Type |
|-----|-------|-----|------|
| 2   | B     | 284 | ARG  |
| 2   | B     | 341 | SER  |
| 2   | B     | 346 | TRP  |
| 3   | C     | 48  | SER  |
| 3   | C     | 71  | GLU  |
| 3   | C     | 120 | ASP  |
| 3   | C     | 123 | ARG  |
| 3   | C     | 170 | SER  |
| 3   | C     | 276 | ILE  |
| 3   | C     | 339 | ARG  |
| 4   | D     | 116 | ASP  |
| 4   | D     | 120 | ASP  |
| 4   | D     | 139 | HIS  |
| 4   | D     | 207 | GLU  |
| 4   | D     | 215 | ARG  |
| 4   | D     | 369 | ARG  |
| 4   | D     | 400 | ARG  |
| 4   | D     | 423 | SER  |
| 5   | E     | 6   | MET  |
| 5   | E     | 107 | SER  |
| 5   | E     | 122 | ARG  |
| 5   | E     | 126 | LYS  |
| 6   | F     | 19  | ARG  |
| 6   | F     | 31  | ARG  |
| 6   | F     | 87  | LEU  |
| 6   | F     | 88  | SER  |
| 6   | F     | 91  | CYS  |
| 6   | F     | 131 | PHE  |
| 6   | F     | 139 | ARG  |
| 6   | F     | 145 | ASN  |
| 6   | F     | 163 | SER  |
| 6   | F     | 164 | SER  |
| 6   | F     | 197 | ARG  |
| 6   | F     | 211 | TYR  |
| 6   | F     | 220 | VAL  |
| 6   | F     | 242 | ASN  |
| 6   | F     | 343 | TYR  |
| 6   | F     | 361 | LEU  |

Sometimes sidechains can be flipped to improve hydrogen bonding and reduce clashes. All (11) such sidechains are listed below:

| Mol | Chain | Res | Type |
|-----|-------|-----|------|
| 1   | A     | 192 | HIS  |
| 1   | A     | 285 | GLN  |
| 1   | A     | 301 | GLN  |
| 2   | B     | 424 | ASN  |
| 3   | C     | 133 | GLN  |
| 3   | C     | 256 | GLN  |
| 4   | D     | 50  | ASN  |
| 4   | D     | 101 | ASN  |
| 5   | E     | 51  | GLN  |
| 5   | E     | 91  | ASN  |
| 6   | F     | 348 | GLN  |

### 5.3.3 RNA [i](#)

There are no RNA molecules in this entry.

### 5.4 Non-standard residues in protein, DNA, RNA chains [i](#)

There are no non-standard protein/DNA/RNA residues in this entry.

### 5.5 Carbohydrates [i](#)

There are no monosaccharides in this entry.

### 5.6 Ligand geometry [i](#)

Of 10 ligands modelled in this entry, 5 are monoatomic - leaving 5 for Mogul analysis.

In the following table, the Counts columns list the number of bonds (or angles) for which Mogul statistics could be retrieved, the number of bonds (or angles) that are observed in the model and the number of bonds (or angles) that are defined in the Chemical Component Dictionary. The Link column lists molecule types, if any, to which the group is linked. The Z score for a bond length (or angle) is the number of standard deviations the observed value is removed from the expected value. A bond length (or angle) with  $|Z| > 2$  is considered an outlier worth inspection. RMSZ is the root-mean-square of all Z scores of the bond lengths (or angles).

| Mol | Type | Chain | Res | Link | Bond lengths |      |          | Bond angles |      |          |
|-----|------|-------|-----|------|--------------|------|----------|-------------|------|----------|
|     |      |       |     |      | Counts       | RMSZ | # Z  > 2 | Counts      | RMSZ | # Z  > 2 |
| 7   | GTP  | C     | 501 | 8    | 26,34,34     | 1.01 | 2 (7%)   | 32,54,54    | 0.68 | 1 (3%)   |
| 7   | GTP  | A     | 501 | 8    | 26,34,34     | 1.01 | 2 (7%)   | 32,54,54    | 0.69 | 1 (3%)   |
| 11  | ACP  | F     | 401 | -    | 27,33,33     | 0.91 | 1 (3%)   | 32,52,52    | 0.82 | 2 (6%)   |

| Mol | Type | Chain | Res | Link | Bond lengths |      |          | Bond angles |      |          |
|-----|------|-------|-----|------|--------------|------|----------|-------------|------|----------|
|     |      |       |     |      | Counts       | RMSZ | # Z  > 2 | Counts      | RMSZ | # Z  > 2 |
| 10  | GDP  | B     | 501 | 8    | 24,30,30     | 1.00 | 2 (8%)   | 30,47,47    | 0.65 | 1 (3%)   |
| 10  | GDP  | D     | 501 | -    | 24,30,30     | 0.98 | 2 (8%)   | 30,47,47    | 0.68 | 1 (3%)   |

In the following table, the Chirals column lists the number of chiral outliers, the number of chiral centers analysed, the number of these observed in the model and the number defined in the Chemical Component Dictionary. Similar counts are reported in the Torsion and Rings columns. '-' means no outliers of that kind were identified.

| Mol | Type | Chain | Res | Link | Chirals | Torsions   | Rings   |
|-----|------|-------|-----|------|---------|------------|---------|
| 7   | GTP  | C     | 501 | 8    | -       | 6/18/38/38 | 0/3/3/3 |
| 7   | GTP  | A     | 501 | 8    | -       | 5/18/38/38 | 0/3/3/3 |
| 11  | ACP  | F     | 401 | -    | -       | 4/15/38/38 | 0/3/3/3 |
| 10  | GDP  | B     | 501 | 8    | -       | 3/12/32/32 | 0/3/3/3 |
| 10  | GDP  | D     | 501 | -    | -       | 2/12/32/32 | 0/3/3/3 |

All (9) bond length outliers are listed below:

| Mol | Chain | Res | Type | Atoms  | Z     | Observed(Å) | Ideal(Å) |
|-----|-------|-----|------|--------|-------|-------------|----------|
| 7   | A     | 501 | GTP  | C5-C6  | -2.72 | 1.41        | 1.47     |
| 10  | D     | 501 | GDP  | C5-C6  | -2.71 | 1.41        | 1.47     |
| 10  | B     | 501 | GDP  | C5-C6  | -2.68 | 1.42        | 1.47     |
| 7   | C     | 501 | GTP  | C5-C6  | -2.67 | 1.42        | 1.47     |
| 11  | F     | 401 | ACP  | PB-O2B | -2.46 | 1.50        | 1.56     |
| 7   | C     | 501 | GTP  | C8-N7  | -2.16 | 1.31        | 1.35     |
| 10  | B     | 501 | GDP  | C8-N7  | -2.14 | 1.31        | 1.35     |
| 7   | A     | 501 | GTP  | C8-N7  | -2.10 | 1.31        | 1.35     |
| 10  | D     | 501 | GDP  | C8-N7  | -2.08 | 1.31        | 1.35     |

All (6) bond angle outliers are listed below:

| Mol | Chain | Res | Type | Atoms      | Z     | Observed(°) | Ideal(°) |
|-----|-------|-----|------|------------|-------|-------------|----------|
| 11  | F     | 401 | ACP  | C5-C6-N6   | 2.27  | 123.81      | 120.35   |
| 11  | F     | 401 | ACP  | O1G-PG-C3B | -2.11 | 106.69      | 111.24   |
| 7   | C     | 501 | GTP  | O6-C6-C5   | 2.07  | 128.41      | 124.37   |
| 7   | A     | 501 | GTP  | O6-C6-C5   | 2.07  | 128.41      | 124.37   |
| 10  | D     | 501 | GDP  | O6-C6-C5   | 2.06  | 128.39      | 124.37   |
| 10  | B     | 501 | GDP  | O6-C6-C5   | 2.03  | 128.33      | 124.37   |

There are no chirality outliers.

All (20) torsion outliers are listed below:

| Mol | Chain | Res | Type | Atoms          |
|-----|-------|-----|------|----------------|
| 7   | A     | 501 | GTP  | C5'-O5'-PA-O1A |
| 7   | C     | 501 | GTP  | PB-O3B-PG-O3G  |
| 7   | C     | 501 | GTP  | C5'-O5'-PA-O1A |
| 10  | B     | 501 | GDP  | C5'-O5'-PA-O1A |
| 10  | B     | 501 | GDP  | C5'-O5'-PA-O2A |
| 10  | D     | 501 | GDP  | C5'-O5'-PA-O3A |
| 10  | D     | 501 | GDP  | C5'-O5'-PA-O2A |
| 11  | F     | 401 | ACP  | PB-C3B-PG-O1G  |
| 7   | A     | 501 | GTP  | PB-O3B-PG-O2G  |
| 7   | A     | 501 | GTP  | PB-O3B-PG-O3G  |
| 7   | A     | 501 | GTP  | C5'-O5'-PA-O3A |
| 7   | C     | 501 | GTP  | C5'-O5'-PA-O3A |
| 11  | F     | 401 | ACP  | C5'-O5'-PA-O3A |
| 7   | A     | 501 | GTP  | C5'-O5'-PA-O2A |
| 7   | C     | 501 | GTP  | C5'-O5'-PA-O2A |
| 11  | F     | 401 | ACP  | PB-C3B-PG-O2G  |
| 10  | B     | 501 | GDP  | C5'-O5'-PA-O3A |
| 7   | C     | 501 | GTP  | PB-O3A-PA-O1A  |
| 7   | C     | 501 | GTP  | PB-O3A-PA-O2A  |
| 11  | F     | 401 | ACP  | C5'-O5'-PA-O1A |

There are no ring outliers.

No monomer is involved in short contacts.

The following is a two-dimensional graphical depiction of Mogul quality analysis of bond lengths, bond angles, torsion angles, and ring geometry for all instances of the Ligand of Interest. In addition, ligands with molecular weight > 250 and outliers as shown on the validation Tables will also be included. For torsion angles, if less than 5% of the Mogul distribution of torsion angles is within 10 degrees of the torsion angle in question, then that torsion angle is considered an outlier. Any bond that is central to one or more torsion angles identified as an outlier by Mogul will be highlighted in the graph. For rings, the root-mean-square deviation (RMSD) between the ring in question and similar rings identified by Mogul is calculated over all ring torsion angles. If the average RMSD is greater than 60 degrees and the minimal RMSD between the ring in question and any Mogul-identified rings is also greater than 60 degrees, then that ring is considered an outlier. The outliers are highlighted in purple. The color gray indicates Mogul did not find sufficient equivalents in the CSD to analyse the geometry.

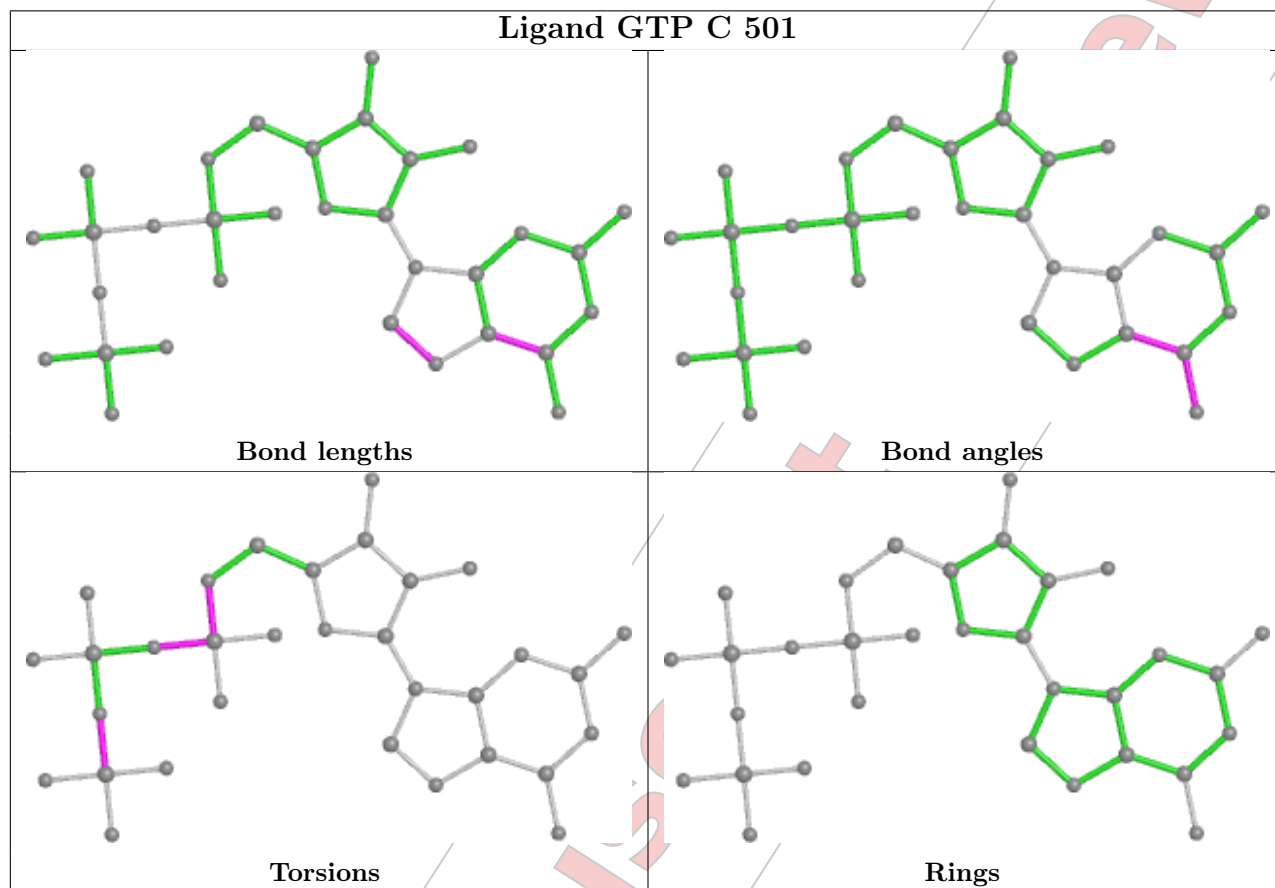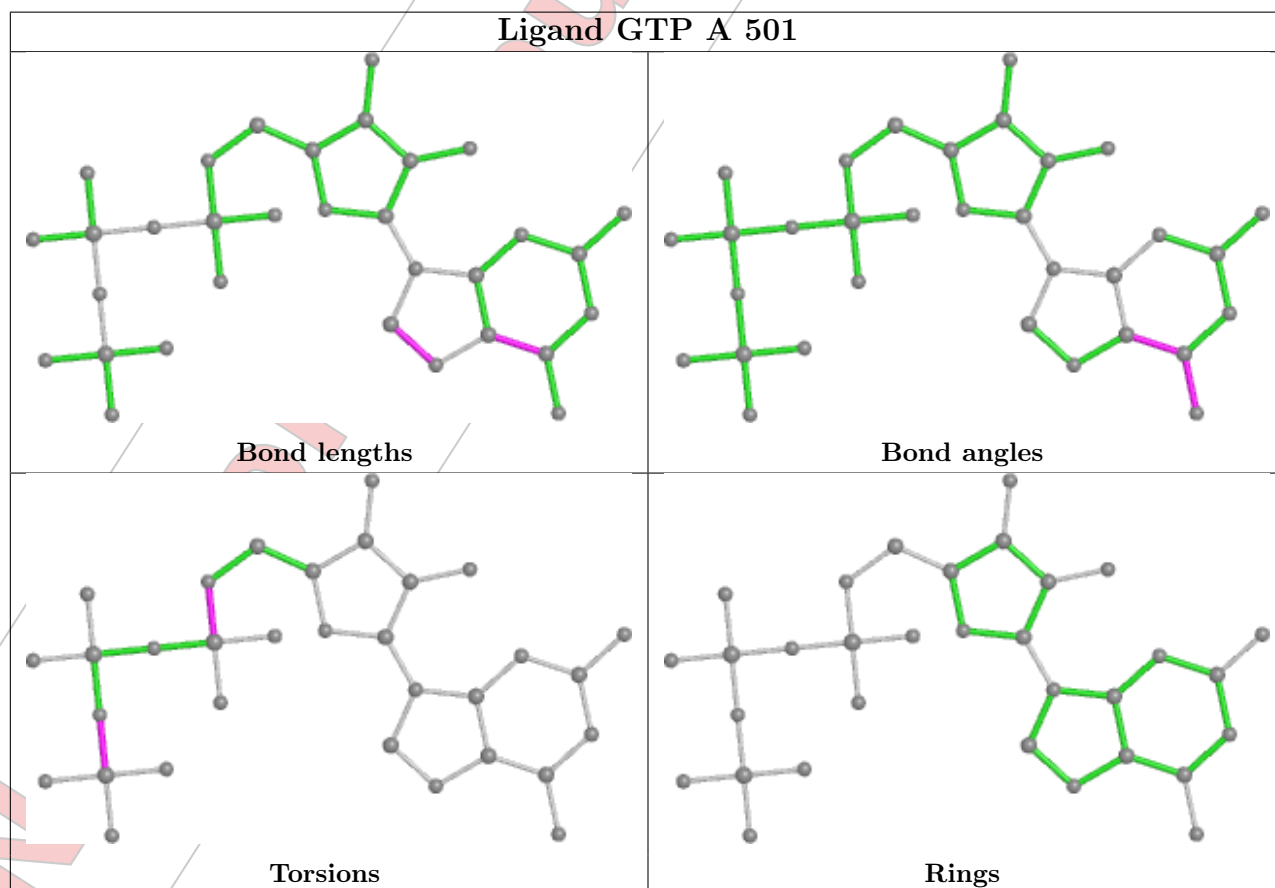

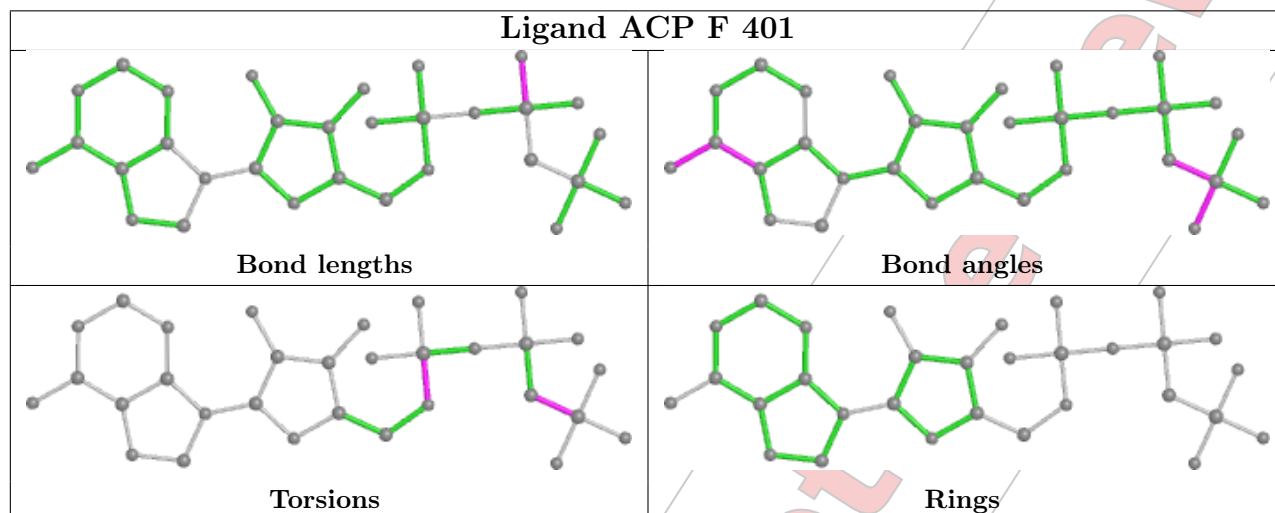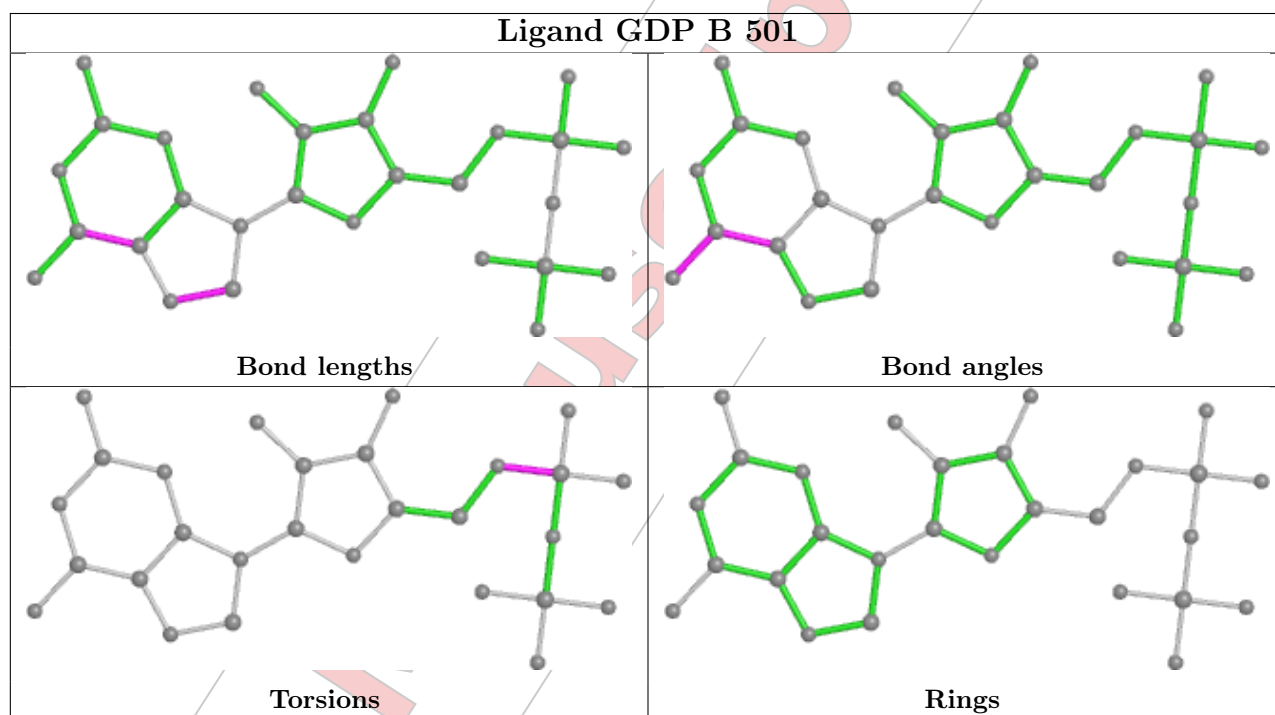

Not For

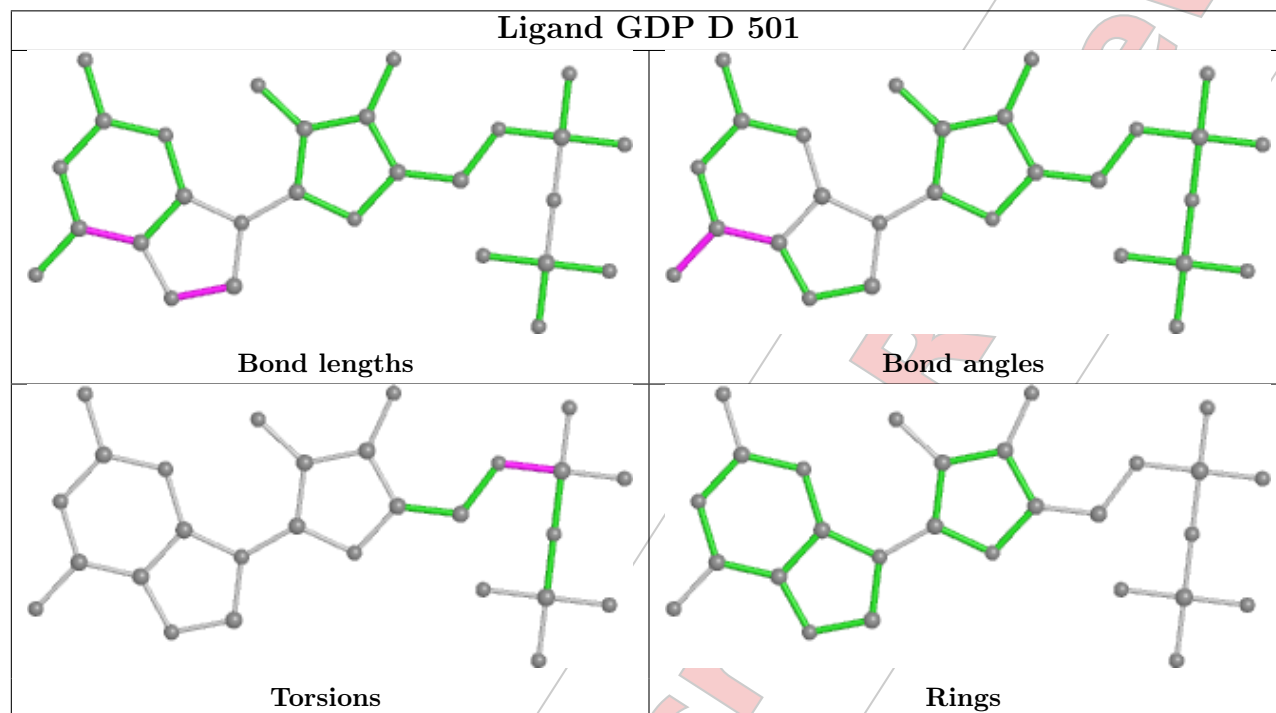

## 5.7 Other polymers [\(i\)](#)

There are no such residues in this entry.

## 5.8 Polymer linkage issues [\(i\)](#)

The following chains have linkage breaks:

| Mol | Chain | Number of breaks |
|-----|-------|------------------|
| 6   | F     | 5                |
| 5   | E     | 1                |
| 2   | B     | 1                |
| 4   | D     | 1                |

All chain breaks are listed below:

| Model | Chain | Residue-1 | Atom-1 | Residue-2 | Atom-2 | Distance (Å) |
|-------|-------|-----------|--------|-----------|--------|--------------|
| 1     | E     | 28:SER    | C      | 44:ASP    | N      | 32.44        |
| 1     | F     | 362:ALA   | C      | 372:THR   | N      | 16.72        |
| 1     | F     | 155:ALA   | C      | 162:ILE   | N      | 13.81        |
| 1     | F     | 102:PRO   | C      | 125:THR   | N      | 12.29        |
| 1     | F     | 246:GLN   | C      | 256:TYR   | N      | 11.47        |
| 1     | B     | 277:SER   | C      | 282:GLN   | N      | 7.96         |
| 1     | D     | 281:GLN   | C      | 285:ALA   | N      | 6.39         |
| 1     | F     | 231:ALA   | C      | 235:ASP   | N      | 6.17         |

## 6 Fit of model and data [i](#)

### 6.1 Protein, DNA and RNA chains [i](#)

In the following table, the column labelled '#RSRZ > 2' contains the number (and percentage) of RSRZ outliers, followed by percent RSRZ outliers for the chain as percentile scores relative to all X-ray entries and entries of similar resolution. The OWAB column contains the minimum, median, 95<sup>th</sup> percentile and maximum values of the occupancy-weighted average B-factor per residue. The column labelled 'Q < 0.9' lists the number of (and percentage) of residues with an average occupancy less than 0.9.

| Mol | Chain | Analysed         | <RSRZ> | #RSRZ > 2      | OWAB(Å <sup>2</sup> ) | Q < 0.9 |
|-----|-------|------------------|--------|----------------|-----------------------|---------|
| 1   | A     | 439/439 (100%)   | -0.06  | 18 (4%) 37 36  | 39, 68, 116, 239      | 0       |
| 2   | B     | 425/425 (100%)   | -0.00  | 17 (4%) 38 37  | 40, 63, 111, 163      | 4 (0%)  |
| 3   | C     | 440/440 (100%)   | -0.21  | 6 (1%) 75 77   | 38, 55, 96, 133       | 0       |
| 4   | D     | 427/427 (100%)   | 0.20   | 26 (6%) 21 20  | 41, 80, 131, 181      | 3 (0%)  |
| 5   | E     | 123/123 (100%)   | 0.69   | 14 (11%) 5 4   | 53, 80, 144, 173      | 0       |
| 6   | F     | 332/332 (100%)   | 0.79   | 58 (17%) 1 1   | 57, 95, 172, 218      | 0       |
| All | All   | 2186/2186 (100%) | 0.14   | 139 (6%) 19 18 | 38, 72, 135, 239      | 7 (0%)  |

All (139) RSRZ outliers are listed below:

| Mol | Chain | Res | Type | RSRZ |
|-----|-------|-----|------|------|
| 4   | D     | 285 | ALA  | 11.1 |
| 6   | F     | 372 | THR  | 10.0 |
| 6   | F     | 154 | GLY  | 8.9  |
| 6   | F     | 155 | ALA  | 8.8  |
| 5   | E     | 143 | ALA  | 8.3  |
| 6   | F     | 137 | ARG  | 8.3  |
| 6   | F     | 142 | ARG  | 7.5  |
| 1   | A     | 439 | SER  | 7.5  |
| 1   | A     | 438 | ASP  | 6.7  |
| 6   | F     | 244 | CYS  | 6.7  |
| 6   | F     | 133 | ALA  | 6.6  |
| 6   | F     | 153 | ALA  | 6.1  |
| 5   | E     | 142 | GLU  | 6.1  |
| 6   | F     | 236 | LYS  | 6.0  |
| 1   | A     | 282 | TYR  | 5.8  |
| 4   | D     | 179 | ASP  | 5.8  |
| 6   | F     | 132 | LEU  | 5.6  |
| 6   | F     | 242 | ASN  | 5.4  |
| 5   | E     | 139 | LEU  | 5.1  |

Continued on next page...

*Continued from previous page...*

| Mol | Chain | Res | Type | RSRZ |
|-----|-------|-----|------|------|
| 6   | F     | 143 | GLU  | 5.0  |
| 6   | F     | 140 | GLU  | 4.9  |
| 6   | F     | 152 | SER  | 4.8  |
| 6   | F     | 125 | THR  | 4.7  |
| 2   | B     | 80  | SER  | 4.7  |
| 5   | E     | 48  | GLU  | 4.4  |
| 6   | F     | 176 | GLN  | 4.4  |
| 4   | D     | 416 | MET  | 4.3  |
| 6   | F     | 171 | ASP  | 4.3  |
| 6   | F     | 381 | HIS  | 4.1  |
| 6   | F     | 175 | GLU  | 4.1  |
| 5   | E     | 28  | SER  | 4.1  |
| 4   | D     | 280 | SER  | 4.0  |
| 5   | E     | 138 | GLU  | 4.0  |
| 3   | C     | 440 | VAL  | 3.8  |
| 6   | F     | 245 | ILE  | 3.7  |
| 4   | D     | 278 | ARG  | 3.7  |
| 4   | D     | 441 | ASP  | 3.6  |
| 5   | E     | 141 | GLU  | 3.6  |
| 6   | F     | 131 | PHE  | 3.6  |
| 4   | D     | 295 | MET  | 3.6  |
| 6   | F     | 141 | GLY  | 3.6  |
| 4   | D     | 277 | SER  | 3.6  |
| 5   | E     | 128 | LYS  | 3.6  |
| 4   | D     | 215 | ARG  | 3.5  |
| 2   | B     | 59  | ASN  | 3.5  |
| 6   | F     | 168 | GLU  | 3.5  |
| 6   | F     | 229 | ASN  | 3.5  |
| 6   | F     | 135 | TYR  | 3.5  |
| 4   | D     | 281 | GLN  | 3.5  |
| 1   | A     | 280 | LYS  | 3.4  |
| 4   | D     | 401 | ARG  | 3.3  |
| 4   | D     | 276 | THR  | 3.3  |
| 2   | B     | 370 | GLY  | 3.3  |
| 6   | F     | 139 | ARG  | 3.2  |
| 6   | F     | 21  | LEU  | 3.2  |
| 6   | F     | 90  | SER  | 3.2  |
| 1   | A     | 281 | ALA  | 3.2  |
| 1   | A     | 163 | LYS  | 3.2  |
| 2   | B     | 321 | GLY  | 3.2  |
| 2   | B     | 57  | THR  | 3.1  |
| 4   | D     | 400 | ARG  | 3.1  |

*Continued on next page...*

*Continued from previous page...*

| Mol | Chain | Res | Type | RSRZ |
|-----|-------|-----|------|------|
| 2   | B     | 438 | ALA  | 3.1  |
| 6   | F     | 243 | HIS  | 3.1  |
| 2   | B     | 56  | ALA  | 3.1  |
| 6   | F     | 174 | ASP  | 3.1  |
| 5   | E     | 140 | LYS  | 3.1  |
| 6   | F     | 89  | GLU  | 3.0  |
| 2   | B     | 39  | ASP  | 3.0  |
| 1   | A     | 262 | TYR  | 3.0  |
| 4   | D     | 82  | PRO  | 3.0  |
| 6   | F     | 130 | VAL  | 3.0  |
| 6   | F     | 256 | TYR  | 3.0  |
| 2   | B     | 369 | ARG  | 3.0  |
| 4   | D     | 406 | HIS  | 2.9  |
| 4   | D     | 76  | ASP  | 2.9  |
| 1   | A     | 283 | HIS  | 2.9  |
| 2   | B     | 85  | GLN  | 2.9  |
| 1   | A     | 437 | VAL  | 2.9  |
| 6   | F     | 333 | ASN  | 2.9  |
| 6   | F     | 259 | GLY  | 2.9  |
| 6   | F     | 177 | GLY  | 2.8  |
| 1   | A     | 365 | GLY  | 2.8  |
| 6   | F     | 167 | SER  | 2.8  |
| 4   | D     | 85  | GLN  | 2.8  |
| 4   | D     | 116 | ASP  | 2.8  |
| 4   | D     | 80  | SER  | 2.7  |
| 6   | F     | 46  | ARG  | 2.7  |
| 1   | A     | 77  | GLU  | 2.7  |
| 4   | D     | 96  | GLN  | 2.7  |
| 6   | F     | 136 | ASN  | 2.7  |
| 6   | F     | 194 | PRO  | 2.7  |
| 2   | B     | 282 | GLN  | 2.7  |
| 6   | F     | 180 | HIS  | 2.7  |
| 6   | F     | 163 | SER  | 2.7  |
| 6   | F     | 165 | GLU  | 2.6  |
| 5   | E     | 44  | ASP  | 2.6  |
| 6   | F     | 91  | CYS  | 2.6  |
| 2   | B     | 416 | MET  | 2.6  |
| 4   | D     | 37  | HIS  | 2.6  |
| 6   | F     | 178 | GLN  | 2.6  |
| 3   | C     | 249 | ASN  | 2.6  |
| 3   | C     | 349 | THR  | 2.5  |
| 6   | F     | 258 | GLU  | 2.5  |

*Continued on next page...*

Continued from previous page...

| Mol | Chain | Res  | Type | RSRZ |
|-----|-------|------|------|------|
| 2   | B     | 439  | THR  | 2.5  |
| 5   | E     | 125  | GLU  | 2.5  |
| 6   | F     | 379  | HIS  | 2.5  |
| 1   | A     | 123  | ARG  | 2.5  |
| 2   | B     | 284  | ARG  | 2.5  |
| 1   | A     | 279  | GLU  | 2.5  |
| 1   | A     | 130  | THR  | 2.5  |
| 4   | D     | 2[A] | ARG  | 2.4  |
| 4   | D     | 38   | GLY  | 2.4  |
| 6   | F     | 126  | ASP  | 2.4  |
| 6   | F     | 235  | ASP  | 2.4  |
| 6   | F     | 362  | ALA  | 2.4  |
| 1   | A     | 215  | ARG  | 2.4  |
| 3   | C     | 357  | TYR  | 2.3  |
| 1   | A     | 337  | THR  | 2.3  |
| 6   | F     | 151  | SER  | 2.3  |
| 4   | D     | 372  | LYS  | 2.3  |
| 1   | A     | 43   | GLY  | 2.3  |
| 5   | E     | 63   | TYR  | 2.3  |
| 6   | F     | 241  | THR  | 2.3  |
| 2   | B     | 130  | ASP  | 2.3  |
| 2   | B     | 209  | LEU  | 2.2  |
| 5   | E     | 122  | ARG  | 2.2  |
| 6   | F     | 129  | GLU  | 2.2  |
| 6   | F     | 323  | GLU  | 2.1  |
| 2   | B     | 440  | ALA  | 2.1  |
| 4   | D     | 221  | THR  | 2.1  |
| 3   | C     | 285  | GLN  | 2.1  |
| 4   | D     | 56   | ALA  | 2.1  |
| 5   | E     | 106  | GLU  | 2.1  |
| 6   | F     | 257  | GLU  | 2.0  |
| 1   | A     | 85   | GLN  | 2.0  |
| 6   | F     | 340  | GLN  | 2.0  |
| 6   | F     | 196  | HIS  | 2.0  |
| 6   | F     | 273  | ASP  | 2.0  |
| 3   | C     | 337  | THR  | 2.0  |

## 6.2 Non-standard residues in protein, DNA, RNA chains [\(i\)](#)

There are no non-standard protein/DNA/RNA residues in this entry.

### 6.3 Carbohydrates [i](#)

There are no monosaccharides in this entry.

### 6.4 Ligands [i](#)

In the following table, the Atoms column lists the number of modelled atoms in the group and the number defined in the chemical component dictionary. The B-factors column lists the minimum, median, 95<sup>th</sup> percentile and maximum values of B factors of atoms in the group. The column labelled 'Q< 0.9' lists the number of atoms with occupancy less than 0.9.

| Mol | Type | Chain | Res | Atoms | RSCC | RSR  | B-factors( $\text{\AA}^2$ ) | Q<0.9 |
|-----|------|-------|-----|-------|------|------|-----------------------------|-------|
| 11  | ACP  | F     | 401 | 31/?  | 0.92 | 0.13 | 92,115,145,162              | 0     |
| 10  | GDP  | D     | 501 | 28/?  | 0.94 | 0.16 | 66,76,101,113               | 0     |
| 9   | CA   | A     | 503 | 1/?   | 0.94 | 0.06 | 89,89,89,89                 | 0     |
| 8   | MG   | A     | 502 | 1/?   | 0.96 | 0.08 | 44,44,44,44                 | 0     |
| 9   | CA   | C     | 503 | 1/?   | 0.96 | 0.04 | 72,72,72,72                 | 0     |
| 10  | GDP  | B     | 501 | 28/?  | 0.97 | 0.15 | 34,50,64,71                 | 0     |
| 7   | GTP  | A     | 501 | 32/?  | 0.97 | 0.15 | 37,50,68,79                 | 0     |
| 8   | MG   | B     | 502 | 1/?   | 0.97 | 0.24 | 57,57,57,57                 | 0     |
| 8   | MG   | C     | 502 | 1/?   | 0.98 | 0.09 | 45,45,45,45                 | 0     |
| 7   | GTP  | C     | 501 | 32/?  | 0.98 | 0.12 | 36,46,62,72                 | 0     |

The following is a graphical depiction of the model fit to experimental electron density of all instances of the Ligand of Interest. In addition, ligands with molecular weight > 250 and outliers as shown on the geometry validation Tables will also be included. Each fit is shown from different orientation to approximate a three-dimensional view.

**Electron density around ACP F 401:**

$2mF_o-DF_c$  (at 0.7 rmsd) in gray  
 $mF_o-DF_c$  (at 3 rmsd) in purple (negative)  
 and green (positive)

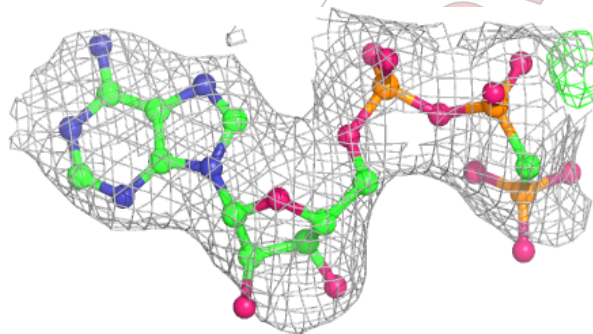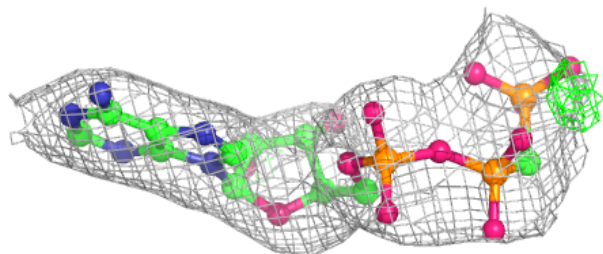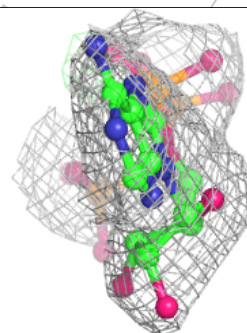

**Electron density around GDP D 501:**

$2mF_o-DF_c$  (at 0.7 rmsd) in gray  
 $mF_o-DF_c$  (at 3 rmsd) in purple (negative)  
 and green (positive)

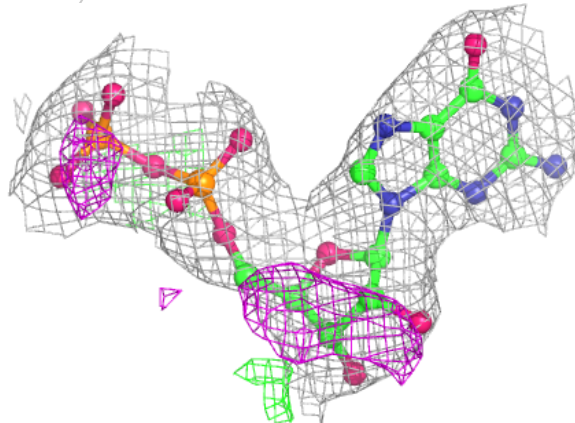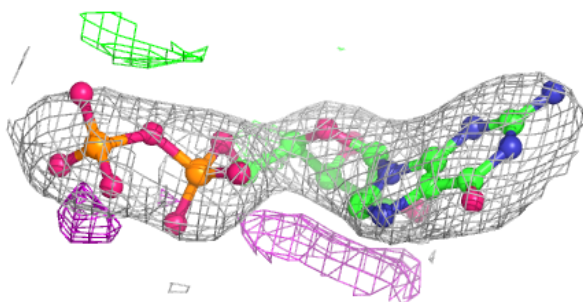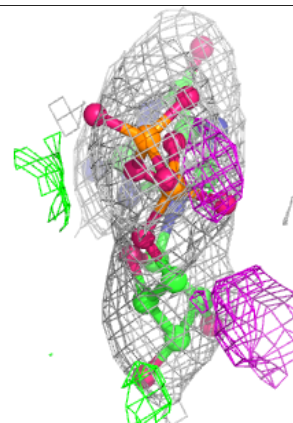

**Electron density around GDP B 501:**

$2mF_o-DF_c$  (at 0.7 rmsd) in gray  
 $mF_o-DF_c$  (at 3 rmsd) in purple (negative)  
and green (positive)

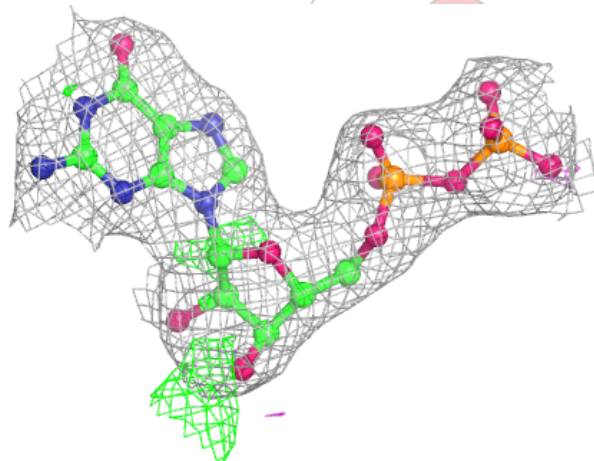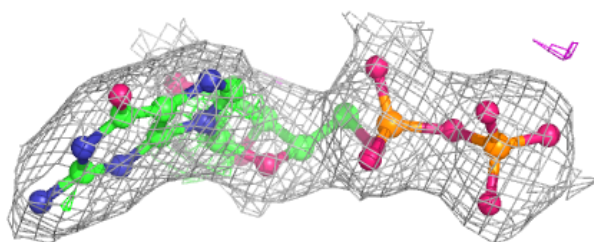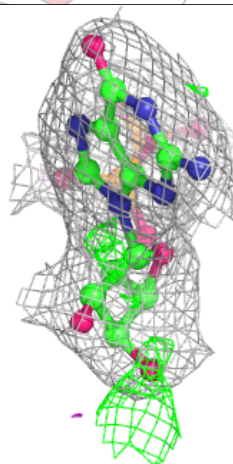

Not For Manuscript

**Electron density around GTP A 501:**

$2mF_o-DF_c$  (at 0.7 rmsd) in gray  
 $mF_o-DF_c$  (at 3 rmsd) in purple (negative)  
and green (positive)

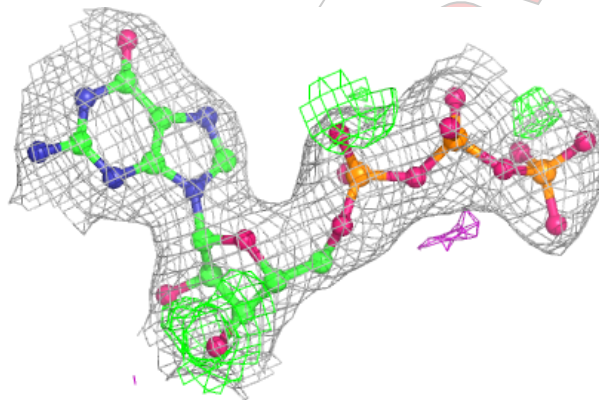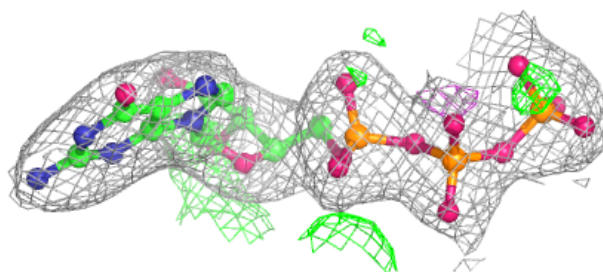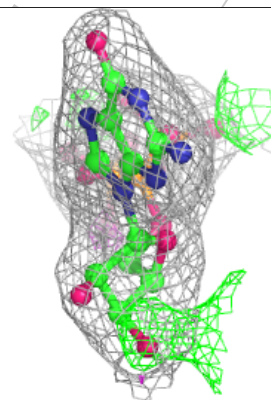

**Electron density around GTP C 501:**

$2mF_o-DF_c$  (at 0.7 rmsd) in gray  
 $mF_o-DF_c$  (at 3 rmsd) in purple (negative)  
and green (positive)

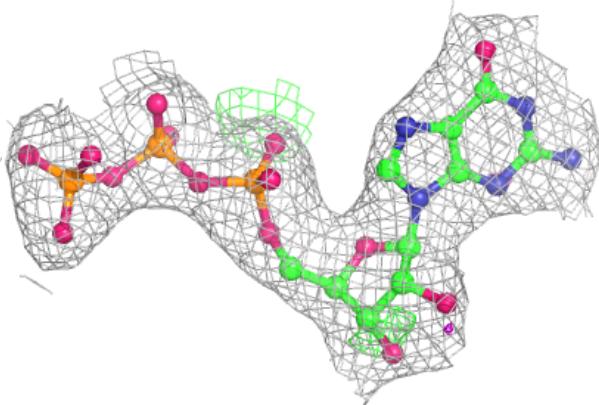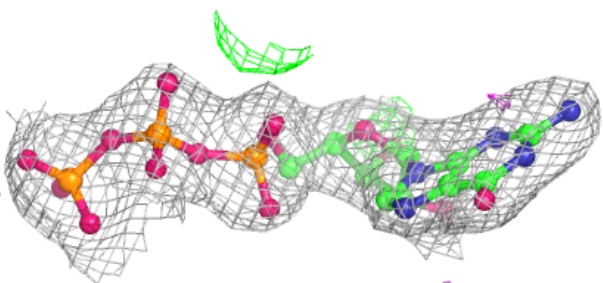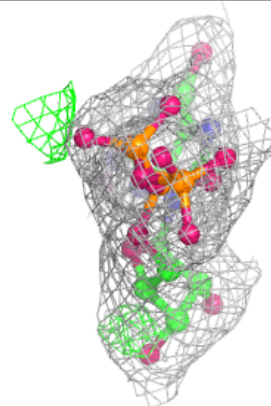

## 6.5 Other polymers [i](#)

There are no such residues in this entry.

Not For Manuscript Review



# Preliminary Full wwPDB X-ray Structure Validation Report ⓘ

Feb 15, 2023 – 07:04 pm GMT

Deposition ID : D\_1292128529

**This wwPDB validation report is NOT for manuscript review**

This is a Preliminary Full wwPDB X-ray Structure Validation Report.

This report is produced by the wwPDB Deposition System during initial deposition but before annotation of the structure.

We welcome your comments at [validation@mail.wwpdb.org](mailto:validation@mail.wwpdb.org)

A user guide is available at

<https://www.wwpdb.org/validation/2017/XrayValidationReportHelp>

with specific help available everywhere you see the ⓘ symbol.

The types of validation reports are described at

<http://www.wwpdb.org/validation/2017/FAQs#types>.

---

The following versions of software and data (see [references ⓘ](#)) were used in the production of this report:

|                                |   |                                                                    |
|--------------------------------|---|--------------------------------------------------------------------|
| MolProbity                     | : | 4.02b-467                                                          |
| Mogul                          | : | 1.8.4, CSD as541be (2020)                                          |
| Xtriage (Phenix)               | : | 1.13                                                               |
| EDS                            | : | 2.32.1                                                             |
| buster-report                  | : | 1.1.7 (2018)                                                       |
| Percentile statistics          | : | 20191225.v01 (using entries in the PDB archive December 25th 2019) |
| Refmac                         | : | 5.8.0158                                                           |
| CCP4                           | : | 7.0.044 (Gargrove)                                                 |
| Ideal geometry (proteins)      | : | Engh & Huber (2001)                                                |
| Ideal geometry (DNA, RNA)      | : | Parkinson et al. (1996)                                            |
| Validation Pipeline (wwPDB-VP) | : | 2.32.1                                                             |

# 1 Overall quality at a glance i

The following experimental techniques were used to determine the structure:

*X-RAY DIFFRACTION*

The reported resolution of this entry is 3.20 Å.

Percentile scores (ranging between 0-100) for global validation metrics of the entry are shown in the following graphic. The table shows the number of entries on which the scores are based.

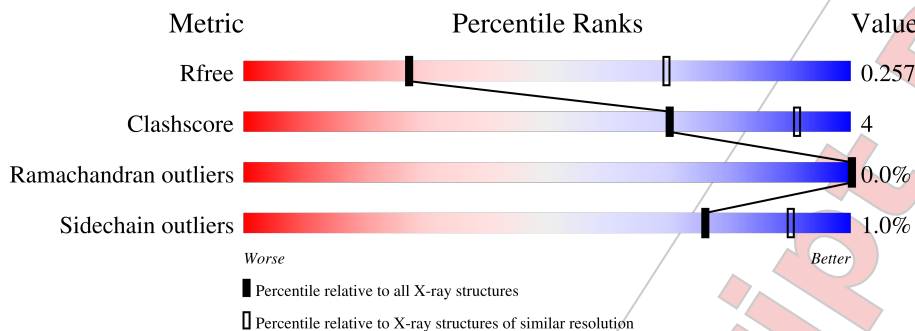

| Metric                | Whole archive<br>(#Entries) | Similar resolution<br>(#Entries, resolution range(Å)) |
|-----------------------|-----------------------------|-------------------------------------------------------|
| $R_{free}$            | 130704                      | 1133 (3.20-3.20)                                      |
| Clashscore            | 141614                      | 1253 (3.20-3.20)                                      |
| Ramachandran outliers | 138981                      | 1234 (3.20-3.20)                                      |
| Sidechain outliers    | 138945                      | 1233 (3.20-3.20)                                      |

The table below summarises the geometric issues observed across the polymeric chains and their fit to the electron density. The red, orange, yellow and green segments of the lower bar indicate the fraction of residues that contain outliers for  $\geq 3$ , 2, 1 and 0 types of geometric quality criteria respectively. A grey segment represents the fraction of residues that are not modelled. The numeric value for each fraction is indicated below the corresponding segment, with a dot representing fractions  $\leq 5\%$ .

| Mol | Chain | Length | Quality of chain                                            |
|-----|-------|--------|-------------------------------------------------------------|
| 1   | A     | 437    | 92% (green), 7% (yellow), 1% (orange), 0% (red), 0% (grey)  |
| 2   | B     | 427    | 94% (green), 6% (yellow), 0% (orange), 0% (red), 0% (grey)  |
| 3   | C     | 440    | 94% (green), 6% (yellow), 0% (orange), 0% (red), 0% (grey)  |
| 4   | D     | 421    | 90% (green), 10% (yellow), 0% (orange), 0% (red), 0% (grey) |
| 5   | E     | 121    | 96% (green), 4% (yellow), 0% (orange), 0% (red), 0% (grey)  |
| 6   | F     | 336    | 84% (green), 14% (yellow), 2% (orange), 0% (red), 0% (grey) |

## 2 Entry composition [i](#)

There are 13 unique types of molecules in this entry. The entry contains 34471 atoms, of which 16974 are hydrogens and 0 are deuteriums.

In the tables below, the ZeroOcc column contains the number of atoms modelled with zero occupancy, the AltConf column contains the number of residues with at least one atom in alternate conformation and the Trace column contains the number of residues modelled with at most 2 atoms.

- Molecule 1 is a protein.

| Mol | Chain | Residues | Atoms |      |      |     |     |    | ZeroOcc | AltConf | Trace |
|-----|-------|----------|-------|------|------|-----|-----|----|---------|---------|-------|
|     |       |          | Total | C    | H    | N   | O   | S  |         |         |       |
| 1   | A     | 437      | 6749  | 2163 | 3333 | 581 | 650 | 22 | 0       | 0       | 0     |

- Molecule 2 is a protein.

| Mol | Chain | Residues | Atoms |      |      |     |     |    | ZeroOcc | AltConf | Trace |
|-----|-------|----------|-------|------|------|-----|-----|----|---------|---------|-------|
|     |       |          | Total | C    | H    | N   | O   | S  |         |         |       |
| 2   | B     | 427      | 6600  | 2110 | 3239 | 576 | 649 | 26 | 0       | 0       | 0     |

- Molecule 3 is a protein.

| Mol | Chain | Residues | Atoms |      |      |     |     |    | ZeroOcc | AltConf | Trace |
|-----|-------|----------|-------|------|------|-----|-----|----|---------|---------|-------|
|     |       |          | Total | C    | H    | N   | O   | S  |         |         |       |
| 3   | C     | 440      | 6789  | 2175 | 3352 | 584 | 656 | 22 | 0       | 0       | 0     |

- Molecule 4 is a protein.

| Mol | Chain | Residues | Atoms |      |      |     |     |    | ZeroOcc | AltConf | Trace |
|-----|-------|----------|-------|------|------|-----|-----|----|---------|---------|-------|
|     |       |          | Total | C    | H    | N   | O   | S  |         |         |       |
| 4   | D     | 421      | 6497  | 2080 | 3188 | 562 | 640 | 27 | 0       | 0       | 0     |

- Molecule 5 is a protein.

| Mol | Chain | Residues | Atoms |     |      |     |     |   | ZeroOcc | AltConf | Trace |
|-----|-------|----------|-------|-----|------|-----|-----|---|---------|---------|-------|
|     |       |          | Total | C   | H    | N   | O   | S |         |         |       |
| 5   | E     | 121      | 2036  | 623 | 1026 | 184 | 198 | 5 | 0       | 1       | 0     |

- Molecule 6 is a protein.

| Mol | Chain | Residues | Atoms |      |      |     |     |    | ZeroOcc | AltConf | Trace |
|-----|-------|----------|-------|------|------|-----|-----|----|---------|---------|-------|
|     |       |          | Total | C    | H    | N   | O   | S  |         |         |       |
| 6   | F     | 336      | 5495  | 1773 | 2734 | 473 | 501 | 14 | 0       | 0       | 0     |

- Molecule 7 is GUANOSINE-5'-TRIPHOSPHATE (three-letter code: GTP) (formula: C<sub>10</sub>H<sub>16</sub>N<sub>5</sub>O<sub>14</sub>P<sub>3</sub>).

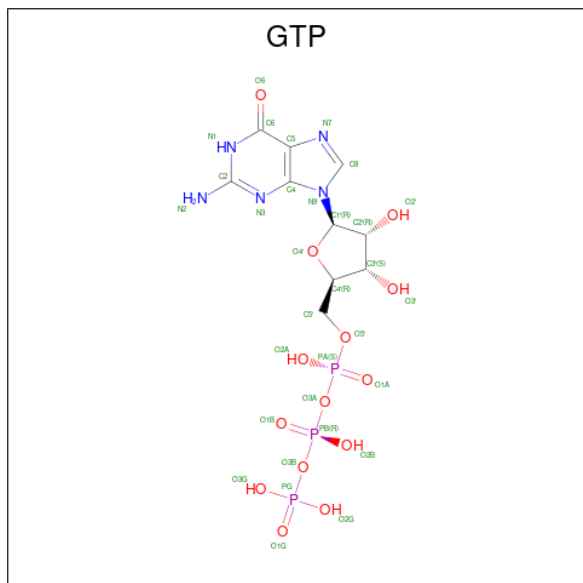

| Mol | Chain | Residues | Atoms |    |    |   |    | ZeroOcc | AltConf |   |
|-----|-------|----------|-------|----|----|---|----|---------|---------|---|
| 7   | X     | 1        | Total | C  | H  | N | O  | P       | 0       | 0 |
|     |       |          | 44    | 10 | 12 | 5 | 14 | 3       |         |   |
| 7   | X     | 1        | Total | C  | H  | N | O  | P       | 0       | 0 |
|     |       |          | 44    | 10 | 12 | 5 | 14 | 3       |         |   |
| 7   | X     | 1        | Total | C  | H  | N | O  | P       | 0       | 0 |
|     |       |          | 40    | 10 | 12 | 5 | 11 | 2       |         |   |

- Molecule 8 is MAGNESIUM ION (three-letter code: MG) (formula: Mg).

| Mol | Chain | Residues | Atoms |    | ZeroOcc | AltConf |
|-----|-------|----------|-------|----|---------|---------|
| 8   | X     | 1        | Total | Mg | 0       | 0       |
|     |       |          | 1     | 1  |         |         |
| 8   | X     | 1        | Total | Mg | 0       | 0       |
|     |       |          | 1     | 1  |         |         |
| 8   | X     | 1        | Total | Mg | 0       | 0       |
|     |       |          | 1     | 1  |         |         |

- Molecule 9 is CALCIUM ION (three-letter code: CA) (formula: Ca).

| Mol | Chain | Residues | Atoms |    | ZeroOcc | AltConf |
|-----|-------|----------|-------|----|---------|---------|
| 9   | X     | 1        | Total | Ca | 0       | 0       |
|     |       |          | 1     | 1  |         |         |
| 9   | X     | 1        | Total | Ca | 0       | 0       |
|     |       |          | 1     | 1  |         |         |

- Molecule 10 is GUANOSINE-5'-DIPHOSPHATE (three-letter code: GDP) (formula:  $C_{10}H_{15}N_5O_{11}P_2$ ).



| Mol | Chain | Residues | Atoms |    |    |   |    | ZeroOcc | AltConf |   |
|-----|-------|----------|-------|----|----|---|----|---------|---------|---|
|     |       |          | Total | C  | H  | N | O  |         |         | P |
| 10  | X     | 1        | 40    | 10 | 12 | 5 | 11 | 2       | 0       | 0 |

- Molecule 11 is a ligand with the chemical component id ANS but its atom names do not match the existing wwPDB Chemical Component Dictionary definition for ANS. Consequently no firm identification of ligand chemistry can be made. Once the structure is annotated then an identification and diagram will be given here.

| Mol | Chain | Residues | Atoms |    |    |    |   | ZeroOcc | AltConf |   |
|-----|-------|----------|-------|----|----|----|---|---------|---------|---|
|     |       |          | Total | C  | Cl | H  | N |         |         | O |
| 11  | X     | 1        | 84    | 32 | 1  | 40 | 2 | 9       | 0       | 0 |

- Molecule 12 is PHOSPHOMETHYLPHOSPHONIC ACID ADENYLATE ESTER (three-letter code: ACP) (formula:  $C_{11}H_{18}N_5O_{12}P_3$ ).



| Mol | Chain | Residues | Atoms |    |    |   |    | ZeroOcc | AltConf |   |
|-----|-------|----------|-------|----|----|---|----|---------|---------|---|
|     |       |          | Total | C  | H  | N | O  |         |         | P |
| 12  | X     | 1        | 45    | 11 | 14 | 5 | 12 | 3       | 0       | 0 |

- Molecule 13 is water.

| Mol | Chain | Residues | Atoms                | ZeroOcc | AltConf |
|-----|-------|----------|----------------------|---------|---------|
| 13  | G     | 3        | Total<br>3<br>O<br>3 | 0       | 0       |

### 3 Residue-property plots i

These plots are drawn for all protein, RNA, DNA and oligosaccharide chains in the entry. The first graphic for a chain summarises the proportions of the various outlier classes displayed in the second graphic. The second graphic shows the sequence view annotated by issues in geometry. Residues are color-coded according to the number of geometric quality criteria for which they contain at least one outlier: green = 0, yellow = 1, orange = 2 and red = 3 or more. Stretches of 2 or more consecutive residues without any outlier are shown as a green connector. Residues present in the sample, but not in the model, are shown in grey.

- Molecule 1:

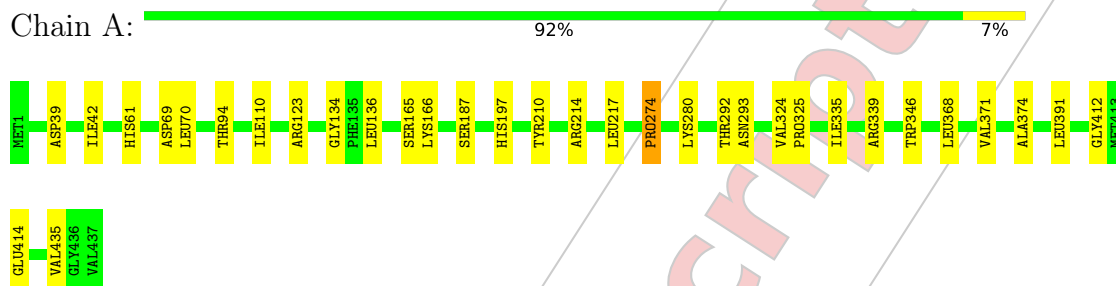

- Molecule 2:

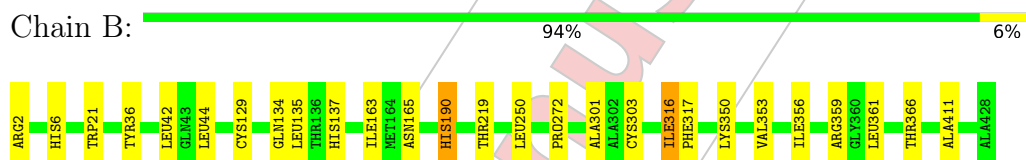

- Molecule 3:

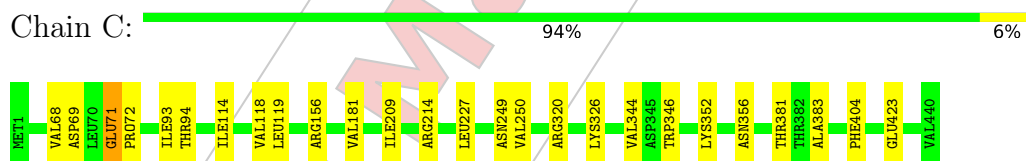

- Molecule 4:

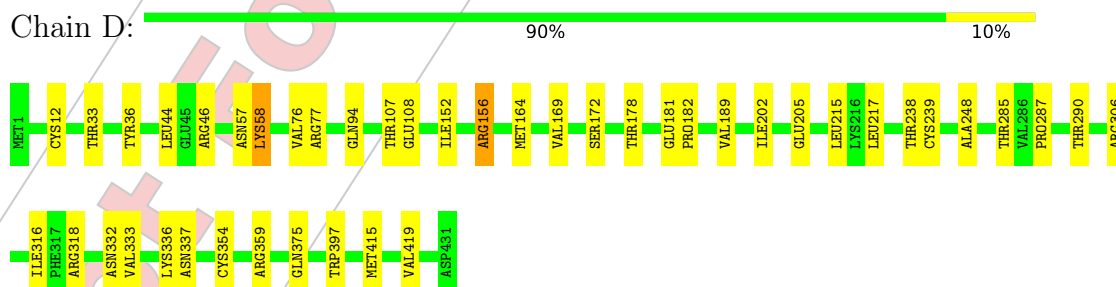

- Molecule 5:

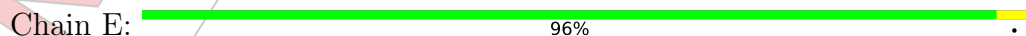

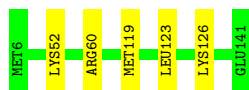

• Molecule 6:

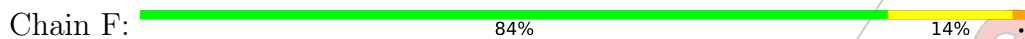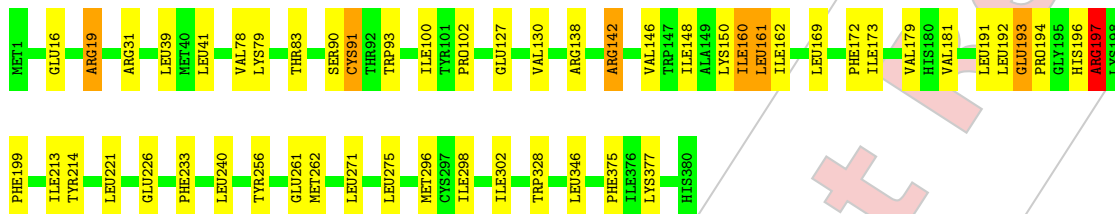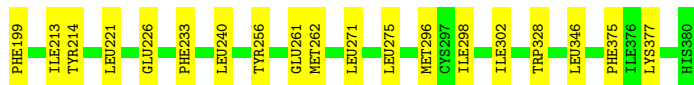

Not For Manuscript Review

## 4 Data and refinement statistics i

| Property                                                                | Value                                                       | Source           |
|-------------------------------------------------------------------------|-------------------------------------------------------------|------------------|
| Space group                                                             | P 21 21 21                                                  | Depositor        |
| Cell constants<br>a, b, c, $\alpha$ , $\beta$ , $\gamma$                | 106.06Å 159.61Å 180.61Å<br>90.00° 90.00° 90.00°             | Depositor        |
| Resolution (Å)                                                          | 15.10 – 3.20<br>15.10 – 2.50                                | Depositor<br>EDS |
| % Data completeness<br>(in resolution range)                            | 99.9 (15.10-3.20)<br>87.7 (15.10-2.50)                      | Depositor<br>EDS |
| $R_{merge}$                                                             | (Not available)                                             | Depositor        |
| $R_{sym}$                                                               | (Not available)                                             | Depositor        |
| $\langle I/\sigma(I) \rangle$ <sup>1</sup>                              | 0.95 (at 2.51Å)                                             | Xtrriage         |
| Refinement program                                                      | .                                                           | Depositor        |
| R, $R_{free}$                                                           | 0.200 , 0.241<br>0.218 , 0.257                              | Depositor<br>DCC |
| $R_{free}$ test set                                                     | 2000 reflections (2.15%)                                    | wwPDB-VP         |
| Wilson B-factor (Å <sup>2</sup> )                                       | 62.5                                                        | Xtrriage         |
| Anisotropy                                                              | 0.057                                                       | Xtrriage         |
| Bulk solvent $k_{sol}$ (e/Å <sup>3</sup> ), $B_{sol}$ (Å <sup>2</sup> ) | 0.42 , 59.1                                                 | EDS              |
| L-test for twinning <sup>2</sup>                                        | $\langle  L  \rangle = 0.48$ , $\langle L^2 \rangle = 0.31$ | Xtrriage         |
| Estimated twinning fraction                                             | No twinning to report.                                      | Xtrriage         |
| $F_o, F_c$ correlation                                                  | 0.92                                                        | EDS              |
| Total number of atoms                                                   | 34471                                                       | wwPDB-VP         |
| Average B, all atoms (Å <sup>2</sup> )                                  | 68.0                                                        | wwPDB-VP         |

Xtrriage's analysis on translational NCS is as follows: *The largest off-origin peak in the Patterson function is 2.57% of the height of the origin peak. No significant pseudotranslation is detected.*

<sup>1</sup>Intensities estimated from amplitudes.

<sup>2</sup>Theoretical values of  $\langle |L| \rangle$ ,  $\langle L^2 \rangle$  for acentric reflections are 0.5, 0.333 respectively for untwinned datasets, and 0.375, 0.2 for perfectly twinned datasets.

## 5 Model quality [i](#)

### 5.1 Standard geometry [i](#)

Bond lengths and bond angles in the following residue types are not validated in this section: CA, GTP, MG, ACP, ANS, GDP

The Z score for a bond length (or angle) is the number of standard deviations the observed value is removed from the expected value. A bond length (or angle) with  $|Z| > 5$  is considered an outlier worth inspection. RMSZ is the root-mean-square of all Z scores of the bond lengths (or angles).

| Mol | Chain | Bond lengths |         | Bond angles |         |
|-----|-------|--------------|---------|-------------|---------|
|     |       | RMSZ         | # Z  >5 | RMSZ        | # Z  >5 |
| 1   | A     | 0.28         | 0/3494  | 0.51        | 0/4743  |
| 2   | B     | 0.28         | 0/3436  | 0.51        | 0/4654  |
| 3   | C     | 0.29         | 0/3515  | 0.51        | 0/4772  |
| 4   | D     | 0.28         | 0/3382  | 0.51        | 0/4581  |
| 5   | E     | 0.26         | 0/1019  | 0.48        | 0/1352  |
| 6   | F     | 0.31         | 0/2823  | 0.54        | 0/3813  |
| All | All   | 0.29         | 0/17669 | 0.51        | 0/23915 |

Chiral center outliers are detected by calculating the chiral volume of a chiral center and verifying if the center is modelled as a planar moiety or with the opposite hand. A planarity outlier is detected by checking planarity of atoms in a peptide group, atoms in a mainchain group or atoms of a sidechain that are expected to be planar.

| Mol | Chain | #Chirality outliers | #Planarity outliers |
|-----|-------|---------------------|---------------------|
| 4   | D     | 0                   | 2                   |
| 6   | F     | 0                   | 3                   |
| All | All   | 0                   | 5                   |

There are no bond length outliers.

There are no bond angle outliers.

There are no chirality outliers.

All (5) planarity outliers are listed below:

| Mol | Chain | Res | Type | Group     |
|-----|-------|-----|------|-----------|
| 4   | D     | 156 | ARG  | Sidechain |
| 4   | D     | 359 | ARG  | Sidechain |
| 6   | F     | 19  | ARG  | Sidechain |
| 6   | F     | 193 | GLU  | Peptide   |
| 6   | F     | 197 | ARG  | Sidechain |

## 5.2 Too-close contacts [i](#)

In the following table, the Non-H and H(model) columns list the number of non-hydrogen atoms and hydrogen atoms in the chain respectively. The H(added) column lists the number of hydrogen atoms added and optimized by MolProbity. The Clashes column lists the number of clashes within the asymmetric unit, whereas Symm-Clashes lists symmetry-related clashes.

| Mol | Chain | Non-H | H(model) | H(added) | Clashes | Symm-Clashes |
|-----|-------|-------|----------|----------|---------|--------------|
| 1   | A     | 3416  | 3333     | 3330     | 22      | 0            |
| 2   | B     | 3361  | 3239     | 3238     | 16      | 0            |
| 3   | C     | 3437  | 3352     | 3348     | 14      | 0            |
| 4   | D     | 3309  | 3188     | 3189     | 26      | 0            |
| 5   | E     | 1010  | 1026     | 1024     | 3       | 0            |
| 6   | F     | 2761  | 2734     | 2733     | 46      | 0            |
| 7   | X     | 92    | 36       | 36       | 1       | 0            |
| 8   | X     | 3     | 0        | 0        | 0       | 0            |
| 9   | X     | 2     | 0        | 0        | 0       | 0            |
| 10  | X     | 28    | 12       | 12       | 0       | 0            |
| 11  | X     | 44    | 40       | 2        | 4       | 0            |
| 12  | X     | 31    | 14       | 14       | 0       | 0            |
| 13  | G     | 3     | 0        | 0        | 0       | 0            |
| All | All   | 17497 | 16974    | 16926    | 125     | 0            |

The all-atom clashscore is defined as the number of clashes found per 1000 atoms (including hydrogen atoms). The all-atom clashscore for this structure is 4.

All (125) close contacts within the same asymmetric unit are listed below, sorted by their clash magnitude.

| Atom-1           | Atom-2           | Interatomic distance (Å) | Clash overlap (Å) |
|------------------|------------------|--------------------------|-------------------|
| 6:F:100:ILE:HD12 | 6:F:173:ILE:HD13 | 1.55                     | 0.89              |
| 1:A:42:ILE:HD12  | 1:A:42:ILE:O     | 1.86                     | 0.75              |
| 6:F:192:LEU:HD23 | 6:F:193:GLU:N    | 2.05                     | 0.72              |
| 6:F:192:LEU:HD22 | 6:F:197:ARG:NE   | 2.07                     | 0.68              |
| 1:A:293:ASN:ND2  | 1:A:339:ARG:HH21 | 1.97                     | 0.63              |
| 1:A:187:SER:HB3  | 1:A:391:LEU:HD21 | 1.81                     | 0.63              |
| 6:F:161:LEU:HD23 | 6:F:172:PHE:CD2  | 2.35                     | 0.62              |
| 6:F:161:LEU:C    | 6:F:161:LEU:HD12 | 2.20                     | 0.60              |
| 6:F:160:ILE:HG21 | 6:F:240:LEU:HD21 | 1.82                     | 0.60              |
| 6:F:161:LEU:HD12 | 6:F:162:ILE:N    | 2.17                     | 0.59              |
| 6:F:192:LEU:HD23 | 6:F:192:LEU:C    | 2.23                     | 0.59              |
| 6:F:90:SER:O     | 6:F:91:CYS:C     | 2.40                     | 0.59              |
| 6:F:377:LYS:HD2  | 6:F:377:LYS:H    | 1.67                     | 0.59              |
| 11:X:510:ANS:C25 | 11:X:510:ANS:CL  | 2.88                     | 0.58              |

Continued on next page...

*Continued from previous page...*

| Atom-1           | Atom-2           | Interatomic distance (Å) | Clash overlap (Å) |
|------------------|------------------|--------------------------|-------------------|
| 2:B:356:ILE:HD12 | 2:B:356:ILE:H    | 1.68                     | 0.58              |
| 4:D:156:ARG:HG2  | 5:E:123:LEU:HD11 | 1.85                     | 0.58              |
| 6:F:192:LEU:HD21 | 6:F:194:PRO:HD2  | 1.85                     | 0.57              |
| 6:F:240:LEU:HD12 | 6:F:240:LEU:N    | 2.20                     | 0.56              |
| 1:A:187:SER:CB   | 1:A:391:LEU:HD21 | 2.34                     | 0.56              |
| 3:C:381:THR:HG22 | 3:C:383:ALA:H    | 1.70                     | 0.56              |
| 4:D:57:ASN:ND2   | 4:D:57:ASN:O     | 2.38                     | 0.56              |
| 3:C:344:VAL:HG21 | 3:C:346:TRP:CE2  | 2.42                     | 0.54              |
| 1:A:274:PRO:HG2  | 1:A:371:VAL:HG11 | 1.88                     | 0.54              |
| 4:D:215:LEU:HB3  | 4:D:217:LEU:HD23 | 1.90                     | 0.54              |
| 6:F:213:ILE:HD11 | 6:F:296:MET:CE   | 2.37                     | 0.53              |
| 1:A:414:GLU:OE2  | 5:E:60:ARG:NH2   | 2.42                     | 0.53              |
| 6:F:197:ARG:HH22 | 6:F:256:TYR:CB   | 2.22                     | 0.53              |
| 4:D:332:ASN:OD1  | 4:D:336:LYS:HE3  | 2.09                     | 0.53              |
| 1:A:70:LEU:HD13  | 1:A:110:ILE:HG21 | 1.90                     | 0.52              |
| 4:D:239:CYS:SG   | 4:D:316:ILE:HD12 | 2.50                     | 0.52              |
| 1:A:274:PRO:HD3  | 1:A:374:ALA:HA   | 1.90                     | 0.52              |
| 4:D:107:THR:OG1  | 4:D:108:GLU:N    | 2.43                     | 0.52              |
| 6:F:199:PHE:CD1  | 6:F:221:LEU:HD23 | 2.45                     | 0.51              |
| 4:D:290:THR:HG22 | 4:D:333:VAL:HG21 | 1.93                     | 0.51              |
| 6:F:161:LEU:HD21 | 6:F:169:LEU:HD23 | 1.92                     | 0.51              |
| 4:D:306:ARG:NH2  | 4:D:337:ASN:OD1  | 2.44                     | 0.50              |
| 2:B:135:LEU:HG   | 2:B:137:HIS:ND1  | 2.27                     | 0.50              |
| 3:C:209:ILE:HG22 | 3:C:227:LEU:HD22 | 1.92                     | 0.50              |
| 6:F:162:ILE:N    | 6:F:162:ILE:HD12 | 2.26                     | 0.50              |
| 1:A:346:TRP:CZ2  | 1:A:435:VAL:HG13 | 2.46                     | 0.50              |
| 4:D:215:LEU:CB   | 4:D:217:LEU:HD23 | 2.42                     | 0.49              |
| 1:A:412:GLY:O    | 5:E:60:ARG:NH1   | 2.46                     | 0.49              |
| 4:D:36:TYR:CE2   | 4:D:44:LEU:HD11  | 2.48                     | 0.49              |
| 3:C:68:VAL:HG21  | 3:C:118:VAL:HG21 | 1.93                     | 0.49              |
| 6:F:79:LYS:O     | 6:F:83:THR:HG23  | 2.12                     | 0.49              |
| 2:B:301:ALA:O    | 2:B:303:CYS:N    | 2.43                     | 0.48              |
| 4:D:318:ARG:HA   | 4:D:354:CYS:O    | 2.14                     | 0.48              |
| 2:B:42:LEU:HD13  | 2:B:356:ILE:HD11 | 1.96                     | 0.48              |
| 6:F:197:ARG:HH22 | 6:F:256:TYR:HB2  | 1.78                     | 0.48              |
| 4:D:189:VAL:HG11 | 4:D:415:MET:HE2  | 1.95                     | 0.47              |
| 6:F:146:VAL:HG11 | 6:F:233:PHE:CE1  | 2.49                     | 0.47              |
| 3:C:249:ASN:OD1  | 3:C:356:ASN:ND2  | 2.47                     | 0.47              |
| 4:D:397:TRP:CZ3  | 11:X:510:ANS:O5  | 2.67                     | 0.47              |
| 6:F:192:LEU:HD11 | 6:F:262:MET:CE   | 2.44                     | 0.47              |
| 6:F:161:LEU:HD23 | 6:F:172:PHE:HD2  | 1.79                     | 0.47              |

*Continued on next page...*

*Continued from previous page...*

| Atom-1           | Atom-2           | Interatomic distance (Å) | Clash overlap (Å) |
|------------------|------------------|--------------------------|-------------------|
| 2:B:219:THR:HG21 | 3:C:326:LYS:HA   | 1.97                     | 0.47              |
| 6:F:127:GLU:HB2  | 6:F:130:VAL:CG1  | 2.45                     | 0.47              |
| 2:B:190:HIS:CD2  | 2:B:411:ALA:HA   | 2.49                     | 0.47              |
| 2:B:36:TYR:CZ    | 2:B:44:LEU:HD11  | 2.50                     | 0.46              |
| 4:D:178:THR:HA   | 11:X:510:ANS:C25 | 2.45                     | 0.46              |
| 6:F:160:ILE:CG2  | 6:F:240:LEU:HD21 | 2.46                     | 0.46              |
| 3:C:119:LEU:HD11 | 3:C:156:ARG:HB3  | 1.97                     | 0.46              |
| 3:C:181:VAL:HG11 | 3:C:404:PHE:CZ   | 2.51                     | 0.46              |
| 1:A:70:LEU:HD13  | 1:A:110:ILE:CG2  | 2.46                     | 0.46              |
| 4:D:285:THR:HB   | 4:D:287:PRO:HD2  | 1.98                     | 0.46              |
| 2:B:356:ILE:HD12 | 2:B:356:ILE:N    | 2.31                     | 0.46              |
| 4:D:152:ILE:HG23 | 4:D:164:MET:HG2  | 1.97                     | 0.45              |
| 6:F:16:GLU:OE2   | 6:F:19:ARG:CZ    | 2.65                     | 0.45              |
| 1:A:39:ASP:OD2   | 1:A:61:HIS:HE1   | 2.00                     | 0.45              |
| 4:D:181:GLU:N    | 4:D:182:PRO:HD2  | 2.32                     | 0.45              |
| 6:F:148:ILE:HD11 | 6:F:160:ILE:HD12 | 1.97                     | 0.45              |
| 2:B:163:ILE:HG21 | 2:B:250:LEU:HB3  | 1.99                     | 0.45              |
| 2:B:272:PRO:HD2  | 2:B:361:LEU:HD13 | 1.99                     | 0.45              |
| 4:D:33:THR:C     | 4:D:58:LYS:HZ1   | 2.20                     | 0.45              |
| 6:F:191:LEU:HD13 | 6:F:196:HIS:CE1  | 2.52                     | 0.44              |
| 1:A:136:LEU:HD12 | 1:A:136:LEU:N    | 2.33                     | 0.44              |
| 1:A:217:LEU:HD21 | 1:A:368:LEU:HD23 | 1.99                     | 0.44              |
| 3:C:250:VAL:HG11 | 3:C:352:LYS:HE3  | 1.99                     | 0.44              |
| 6:F:271:LEU:HD23 | 6:F:275:LEU:HD12 | 1.99                     | 0.44              |
| 2:B:135:LEU:HD23 | 2:B:137:HIS:CE1  | 2.52                     | 0.44              |
| 1:A:210:TYR:CE2  | 1:A:214:ARG:HD2  | 2.53                     | 0.44              |
| 4:D:172:SER:OG   | 4:D:205:GLU:OE1  | 2.30                     | 0.44              |
| 1:A:335:ILE:HG23 | 1:A:339:ARG:HG3  | 1.99                     | 0.44              |
| 6:F:150:LYS:HG2  | 6:F:160:ILE:HD11 | 1.99                     | 0.43              |
| 6:F:346:LEU:C    | 6:F:346:LEU:HD13 | 2.38                     | 0.43              |
| 3:C:344:VAL:HG21 | 3:C:346:TRP:CZ2  | 2.52                     | 0.43              |
| 6:F:226:GLU:OE1  | 6:F:226:GLU:N    | 2.51                     | 0.43              |
| 6:F:78:VAL:HG21  | 6:F:181:VAL:HG21 | 2.00                     | 0.43              |
| 6:F:102:PRO:HD2  | 6:F:179:VAL:HA   | 2.00                     | 0.43              |
| 6:F:161:LEU:HD11 | 6:F:169:LEU:HD23 | 1.99                     | 0.43              |
| 1:A:292:THR:HG22 | 1:A:335:ILE:CD1  | 2.49                     | 0.43              |
| 6:F:91:CYS:SG    | 6:F:93:TRP:CE2   | 3.12                     | 0.43              |
| 4:D:169:VAL:HA   | 4:D:202:ILE:O    | 2.19                     | 0.43              |
| 1:A:324:VAL:CG2  | 1:A:325:PRO:HD2  | 2.48                     | 0.42              |
| 1:A:324:VAL:HG23 | 1:A:325:PRO:HD2  | 2.01                     | 0.42              |
| 4:D:238:THR:HB   | 4:D:316:ILE:HD13 | 2.02                     | 0.42              |

*Continued on next page...*

Continued from previous page...

| Atom-1           | Atom-2           | Interatomic distance (Å) | Clash overlap (Å) |
|------------------|------------------|--------------------------|-------------------|
| 6:F:39:LEU:HD21  | 6:F:41:LEU:HD21  | 2.00                     | 0.42              |
| 2:B:316:ILE:HG23 | 2:B:366:THR:HB   | 2.01                     | 0.42              |
| 3:C:93:ILE:HG22  | 3:C:114:ILE:HD11 | 2.02                     | 0.42              |
| 6:F:221:LEU:O    | 6:F:261:GLU:HA   | 2.19                     | 0.42              |
| 2:B:2:ARG:HA     | 2:B:129:CYS:O    | 2.20                     | 0.42              |
| 4:D:46:ARG:NH2   | 4:D:248:ALA:O    | 2.52                     | 0.42              |
| 11:X:510:ANS:C2  | 11:X:510:ANS:C29 | 2.97                     | 0.42              |
| 6:F:214:TYR:HB3  | 6:F:375:PHE:HB3  | 2.02                     | 0.41              |
| 6:F:240:LEU:N    | 6:F:240:LEU:CD1  | 2.82                     | 0.41              |
| 2:B:317:PHE:O    | 2:B:353:VAL:HA   | 2.20                     | 0.41              |
| 3:C:320:ARG:HA   | 3:C:356:ASN:O    | 2.20                     | 0.41              |
| 4:D:94:GLN:OE1   | 4:D:94:GLN:N     | 2.47                     | 0.41              |
| 6:F:298:ILE:HD12 | 6:F:302:ILE:HD13 | 2.02                     | 0.41              |
| 6:F:213:ILE:CD1  | 6:F:296:MET:CE   | 2.98                     | 0.41              |
| 6:F:138:ARG:O    | 6:F:142:ARG:N    | 2.53                     | 0.41              |
| 3:C:71:GLU:HG2   | 3:C:72:PRO:HD2   | 2.03                     | 0.41              |
| 6:F:148:ILE:HD11 | 6:F:160:ILE:CD1  | 2.51                     | 0.41              |
| 2:B:6:HIS:CD2    | 2:B:21:TRP:HE1   | 2.39                     | 0.41              |
| 3:C:69:ASP:O     | 3:C:94:THR:HA    | 2.21                     | 0.41              |
| 1:A:166:LYS:HE2  | 1:A:197:HIS:O    | 2.21                     | 0.40              |
| 6:F:256:TYR:CD1  | 6:F:256:TYR:N    | 2.89                     | 0.40              |
| 2:B:134:GLN:HA   | 2:B:165:ASN:O    | 2.20                     | 0.40              |
| 6:F:93:TRP:O     | 6:F:328:TRP:HA   | 2.22                     | 0.40              |
| 6:F:161:LEU:HD11 | 6:F:169:LEU:CD2  | 2.51                     | 0.40              |
| 1:A:69:ASP:O     | 1:A:94:THR:HA    | 2.21                     | 0.40              |
| 1:A:134:GLY:HA3  | 1:A:165:SER:O    | 2.22                     | 0.40              |
| 4:D:12:CYS:HB2   | 7:X:509:GTP:C8   | 2.55                     | 0.40              |
| 4:D:76:VAL:HG23  | 4:D:77:ARG:N     | 2.37                     | 0.40              |
| 4:D:375:GLN:HB2  | 4:D:419:VAL:HG13 | 2.04                     | 0.40              |

There are no symmetry-related clashes.

## 5.3 Torsion angles [i](#)

### 5.3.1 Protein backbone [i](#)

In the following table, the Percentiles column shows the percent Ramachandran outliers of the chain as a percentile score with respect to all X-ray entries followed by that with respect to entries of similar resolution.

The Analysed column shows the number of residues for which the backbone conformation was analysed, and the total number of residues.

| Mol | Chain | Analysed        | Favoured   | Allowed | Outliers | Percentiles |     |
|-----|-------|-----------------|------------|---------|----------|-------------|-----|
| 1   | A     | 435/437 (100%)  | 422 (97%)  | 13 (3%) | 0        | 100         | 100 |
| 2   | B     | 425/427 (100%)  | 416 (98%)  | 9 (2%)  | 0        | 100         | 100 |
| 3   | C     | 438/440 (100%)  | 426 (97%)  | 12 (3%) | 0        | 100         | 100 |
| 4   | D     | 417/421 (99%)   | 407 (98%)  | 10 (2%) | 0        | 100         | 100 |
| 5   | E     | 118/121 (98%)   | 116 (98%)  | 2 (2%)  | 0        | 100         | 100 |
| 6   | F     | 326/336 (97%)   | 309 (95%)  | 16 (5%) | 1 (0%)   | 41          | 74  |
| All | All   | 2159/2182 (99%) | 2096 (97%) | 62 (3%) | 1 (0%)   | 100         | 100 |

All (1) Ramachandran outliers are listed below:

| Mol | Chain | Res | Type |
|-----|-------|-----|------|
| 6   | F     | 91  | CYS  |

### 5.3.2 Protein sidechains [i](#)

In the following table, the Percentiles column shows the percent sidechain outliers of the chain as a percentile score with respect to all X-ray entries followed by that with respect to entries of similar resolution.

The Analysed column shows the number of residues for which the sidechain conformation was analysed, and the total number of residues.

| Mol | Chain | Analysed         | Rotameric  | Outliers | Percentiles |    |
|-----|-------|------------------|------------|----------|-------------|----|
| 1   | A     | 368/368 (100%)   | 365 (99%)  | 3 (1%)   | 81          | 93 |
| 2   | B     | 369/369 (100%)   | 365 (99%)  | 4 (1%)   | 73          | 88 |
| 3   | C     | 371/371 (100%)   | 368 (99%)  | 3 (1%)   | 81          | 93 |
| 4   | D     | 364/364 (100%)   | 363 (100%) | 1 (0%)   | 92          | 96 |
| 5   | E     | 110/109 (101%)   | 107 (97%)  | 3 (3%)   | 44          | 75 |
| 6   | F     | 303/303 (100%)   | 298 (98%)  | 5 (2%)   | 60          | 83 |
| All | All   | 1885/1884 (100%) | 1866 (99%) | 19 (1%)  | 76          | 90 |

All (19) residues with a non-rotameric sidechain are listed below:

| Mol | Chain | Res | Type |
|-----|-------|-----|------|
| 1   | A     | 123 | ARG  |
| 1   | A     | 274 | PRO  |
| 1   | A     | 280 | LYS  |
| 2   | B     | 190 | HIS  |

Continued on next page...

Continued from previous page...

| Mol | Chain | Res | Type |
|-----|-------|-----|------|
| 2   | B     | 316 | ILE  |
| 2   | B     | 350 | LYS  |
| 2   | B     | 359 | ARG  |
| 3   | C     | 71  | GLU  |
| 3   | C     | 214 | ARG  |
| 3   | C     | 423 | GLU  |
| 4   | D     | 58  | LYS  |
| 5   | E     | 52  | LYS  |
| 5   | E     | 119 | MET  |
| 5   | E     | 126 | LYS  |
| 6   | F     | 31  | ARG  |
| 6   | F     | 142 | ARG  |
| 6   | F     | 160 | ILE  |
| 6   | F     | 161 | LEU  |
| 6   | F     | 197 | ARG  |

Sometimes sidechains can be flipped to improve hydrogen bonding and reduce clashes. All (8) such sidechains are listed below:

| Mol | Chain | Res | Type |
|-----|-------|-----|------|
| 1   | A     | 61  | HIS  |
| 2   | B     | 8   | GLN  |
| 2   | B     | 134 | GLN  |
| 2   | B     | 375 | GLN  |
| 2   | B     | 426 | GLN  |
| 3   | C     | 101 | ASN  |
| 4   | D     | 14  | ASN  |
| 4   | D     | 134 | GLN  |

### 5.3.3 RNA [i](#)

There are no RNA molecules in this entry.

### 5.4 Non-standard residues in protein, DNA, RNA chains [i](#)

There are no non-standard protein/DNA/RNA residues in this entry.

### 5.5 Carbohydrates [i](#)

There are no monosaccharides in this entry.

## 5.6 Ligand geometry [i](#)

Of 11 ligands modelled in this entry, 5 are monoatomic and 1 could not be matched to an existing wwPDB Chemical Component Dictionary definition at this stage - leaving 5 for Mogul analysis.

In the following table, the Counts columns list the number of bonds (or angles) for which Mogul statistics could be retrieved, the number of bonds (or angles) that are observed in the model and the number of bonds (or angles) that are defined in the Chemical Component Dictionary. The Link column lists molecule types, if any, to which the group is linked. The Z score for a bond length (or angle) is the number of standard deviations the observed value is removed from the expected value. A bond length (or angle) with  $|Z| > 2$  is considered an outlier worth inspection. RMSZ is the root-mean-square of all Z scores of the bond lengths (or angles).

| Mol | Type | Chain | Res | Link | Bond lengths |      |          | Bond angles |      |          |
|-----|------|-------|-----|------|--------------|------|----------|-------------|------|----------|
|     |      |       |     |      | Counts       | RMSZ | # Z  > 2 | Counts      | RMSZ | # Z  > 2 |
| 12  | ACP  | X     | 511 | -    | 27,33,33     | 0.86 | 1 (3%)   | 32,52,52    | 1.57 | 2 (6%)   |
| 7   | GTP  | X     | 509 | -    | 24,30,34     | 1.08 | 3 (12%)  | 30,47,54    | 0.88 | 1 (3%)   |
| 7   | GTP  | X     | 506 | 8    | 26,34,34     | 1.07 | 3 (11%)  | 32,54,54    | 0.77 | 0        |
| 7   | GTP  | X     | 501 | 8    | 26,34,34     | 1.08 | 3 (11%)  | 32,54,54    | 0.75 | 0        |
| 10  | GDP  | X     | 504 | 8    | 24,30,30     | 1.04 | 3 (12%)  | 30,47,47    | 0.69 | 1 (3%)   |

In the following table, the Chirals column lists the number of chiral outliers, the number of chiral centers analysed, the number of these observed in the model and the number defined in the Chemical Component Dictionary. Similar counts are reported in the Torsion and Rings columns. '-' means no outliers of that kind were identified.

| Mol | Type | Chain | Res | Link | Chirals | Torsions   | Rings   |
|-----|------|-------|-----|------|---------|------------|---------|
| 12  | ACP  | X     | 511 | -    | -       | 6/15/38/38 | 0/3/3/3 |
| 7   | GTP  | X     | 509 | -    | -       | 4/12/32/38 | 0/3/3/3 |
| 7   | GTP  | X     | 506 | 8    | -       | 5/18/38/38 | 0/3/3/3 |
| 7   | GTP  | X     | 501 | 8    | -       | 4/18/38/38 | 0/3/3/3 |
| 10  | GDP  | X     | 504 | 8    | -       | 3/12/32/32 | 0/3/3/3 |

All (13) bond length outliers are listed below:

| Mol | Chain | Res | Type | Atoms  | Z     | Observed(Å) | Ideal(Å) |
|-----|-------|-----|------|--------|-------|-------------|----------|
| 12  | X     | 511 | ACP  | PB-O3A | 3.41  | 1.62        | 1.58     |
| 7   | X     | 509 | GTP  | C5-C6  | -2.99 | 1.41        | 1.47     |
| 7   | X     | 501 | GTP  | C5-C6  | -2.95 | 1.41        | 1.47     |
| 7   | X     | 506 | GTP  | C5-C6  | -2.91 | 1.41        | 1.47     |
| 10  | X     | 504 | GDP  | C5-C6  | -2.74 | 1.41        | 1.47     |
| 7   | X     | 501 | GTP  | C8-N7  | -2.25 | 1.31        | 1.35     |

Continued on next page...

Continued from previous page...

| Mol | Chain | Res | Type | Atoms | Z     | Observed(Å) | Ideal(Å) |
|-----|-------|-----|------|-------|-------|-------------|----------|
| 7   | X     | 506 | GTP  | C8-N7 | -2.20 | 1.31        | 1.35     |
| 7   | X     | 509 | GTP  | C8-N7 | -2.20 | 1.31        | 1.35     |
| 7   | X     | 506 | GTP  | C5-C4 | -2.13 | 1.37        | 1.43     |
| 10  | X     | 504 | GDP  | C8-N7 | -2.10 | 1.31        | 1.35     |
| 7   | X     | 501 | GTP  | C5-C4 | -2.10 | 1.37        | 1.43     |
| 10  | X     | 504 | GDP  | C5-C4 | -2.01 | 1.37        | 1.43     |
| 7   | X     | 509 | GTP  | C5-C4 | -2.00 | 1.38        | 1.43     |

All (4) bond angle outliers are listed below:

| Mol | Chain | Res | Type | Atoms      | Z     | Observed(°) | Ideal(°) |
|-----|-------|-----|------|------------|-------|-------------|----------|
| 12  | X     | 511 | ACP  | PB-O3A-PA  | -7.10 | 110.06      | 132.56   |
| 12  | X     | 511 | ACP  | C5-C6-N6   | 2.31  | 123.86      | 120.35   |
| 7   | X     | 509 | GTP  | O2B-PB-O1B | 2.26  | 119.53      | 110.68   |
| 10  | X     | 504 | GDP  | O6-C6-C5   | 2.10  | 128.48      | 124.37   |

There are no chirality outliers.

All (22) torsion outliers are listed below:

| Mol | Chain | Res | Type | Atoms           |
|-----|-------|-----|------|-----------------|
| 7   | X     | 501 | GTP  | C5'-O5'-PA-O3A  |
| 7   | X     | 501 | GTP  | C5'-O5'-PA-O2A  |
| 7   | X     | 506 | GTP  | C5'-O5'-PA-O3A  |
| 7   | X     | 506 | GTP  | C5'-O5'-PA-O2A  |
| 7   | X     | 509 | GTP  | C5'-O5'-PA-O1A  |
| 7   | X     | 509 | GTP  | C5'-O5'-PA-O2A  |
| 10  | X     | 504 | GDP  | PA-O3A-PB-O3B   |
| 10  | X     | 504 | GDP  | C5'-O5'-PA-O3A  |
| 12  | X     | 511 | ACP  | PB-C3B-PG-O1G   |
| 12  | X     | 511 | ACP  | PB-C3B-PG-O3G   |
| 12  | X     | 511 | ACP  | PG-C3B-PB-O1B   |
| 12  | X     | 511 | ACP  | PG-C3B-PB-O3A   |
| 12  | X     | 511 | ACP  | O4'-C4'-C5'-O5' |
| 7   | X     | 506 | GTP  | C4'-C5'-O5'-PA  |
| 7   | X     | 509 | GTP  | C4'-C5'-O5'-PA  |
| 12  | X     | 511 | ACP  | C3'-C4'-C5'-O5' |
| 7   | X     | 501 | GTP  | C4'-C5'-O5'-PA  |
| 7   | X     | 506 | GTP  | C5'-O5'-PA-O1A  |
| 10  | X     | 504 | GDP  | C5'-O5'-PA-O2A  |
| 7   | X     | 501 | GTP  | PA-O3A-PB-O2B   |
| 7   | X     | 506 | GTP  | PA-O3A-PB-O2B   |
| 7   | X     | 509 | GTP  | C5'-O5'-PA-O3A  |

There are no ring outliers.

1 monomer is involved in 1 short contact:

| Mol | Chain | Res | Type | Clashes | Symm-Clashes |
|-----|-------|-----|------|---------|--------------|
| 7   | X     | 509 | GTP  | 1       | 0            |

The following is a two-dimensional graphical depiction of Mogul quality analysis of bond lengths, bond angles, torsion angles, and ring geometry for all instances of the Ligand of Interest. In addition, ligands with molecular weight > 250 and outliers as shown on the validation Tables will also be included. For torsion angles, if less than 5% of the Mogul distribution of torsion angles is within 10 degrees of the torsion angle in question, then that torsion angle is considered an outlier. Any bond that is central to one or more torsion angles identified as an outlier by Mogul will be highlighted in the graph. For rings, the root-mean-square deviation (RMSD) between the ring in question and similar rings identified by Mogul is calculated over all ring torsion angles. If the average RMSD is greater than 60 degrees and the minimal RMSD between the ring in question and any Mogul-identified rings is also greater than 60 degrees, then that ring is considered an outlier. The outliers are highlighted in purple. The color gray indicates Mogul did not find sufficient equivalents in the CSD to analyse the geometry.

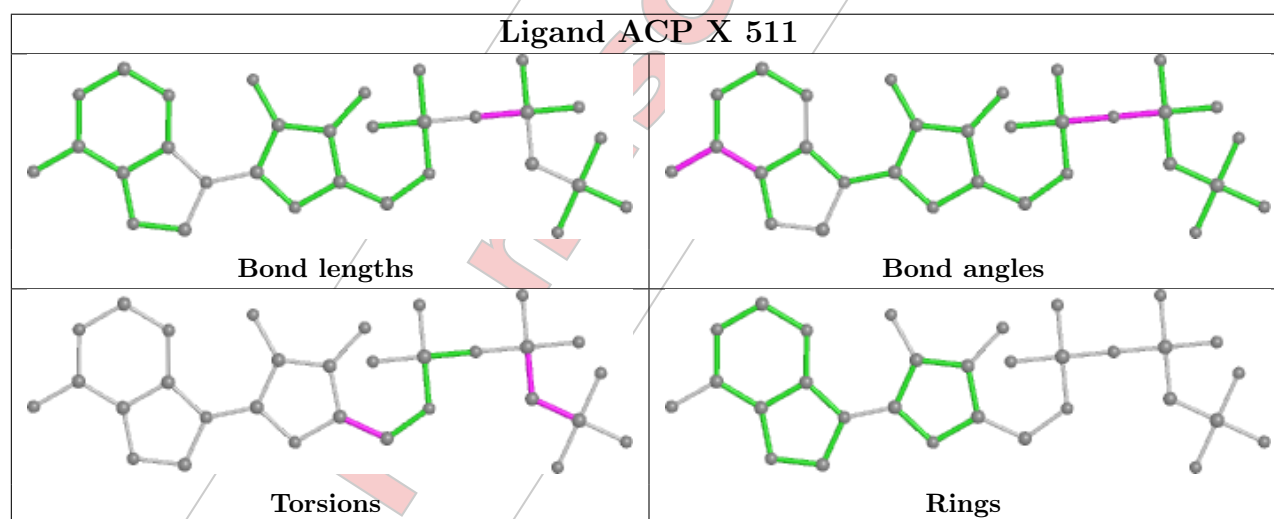

Not For

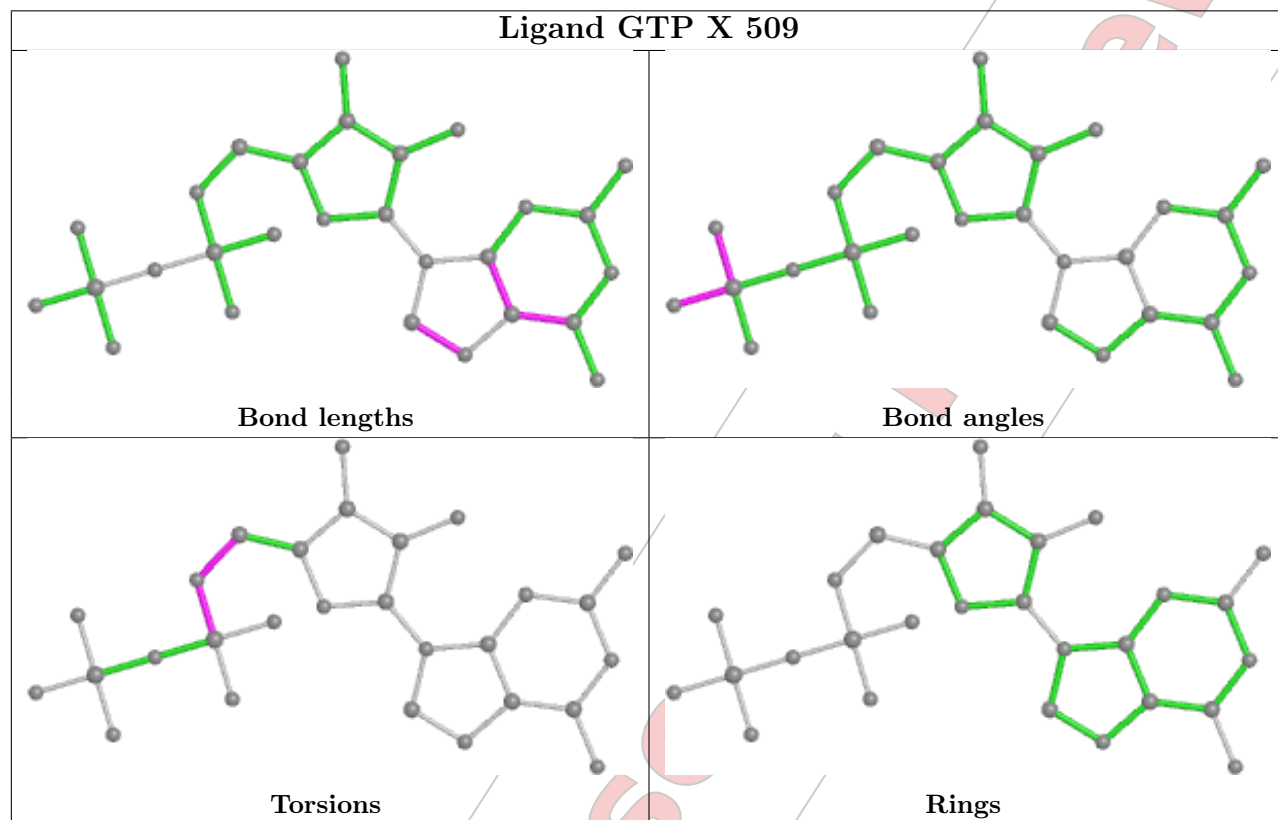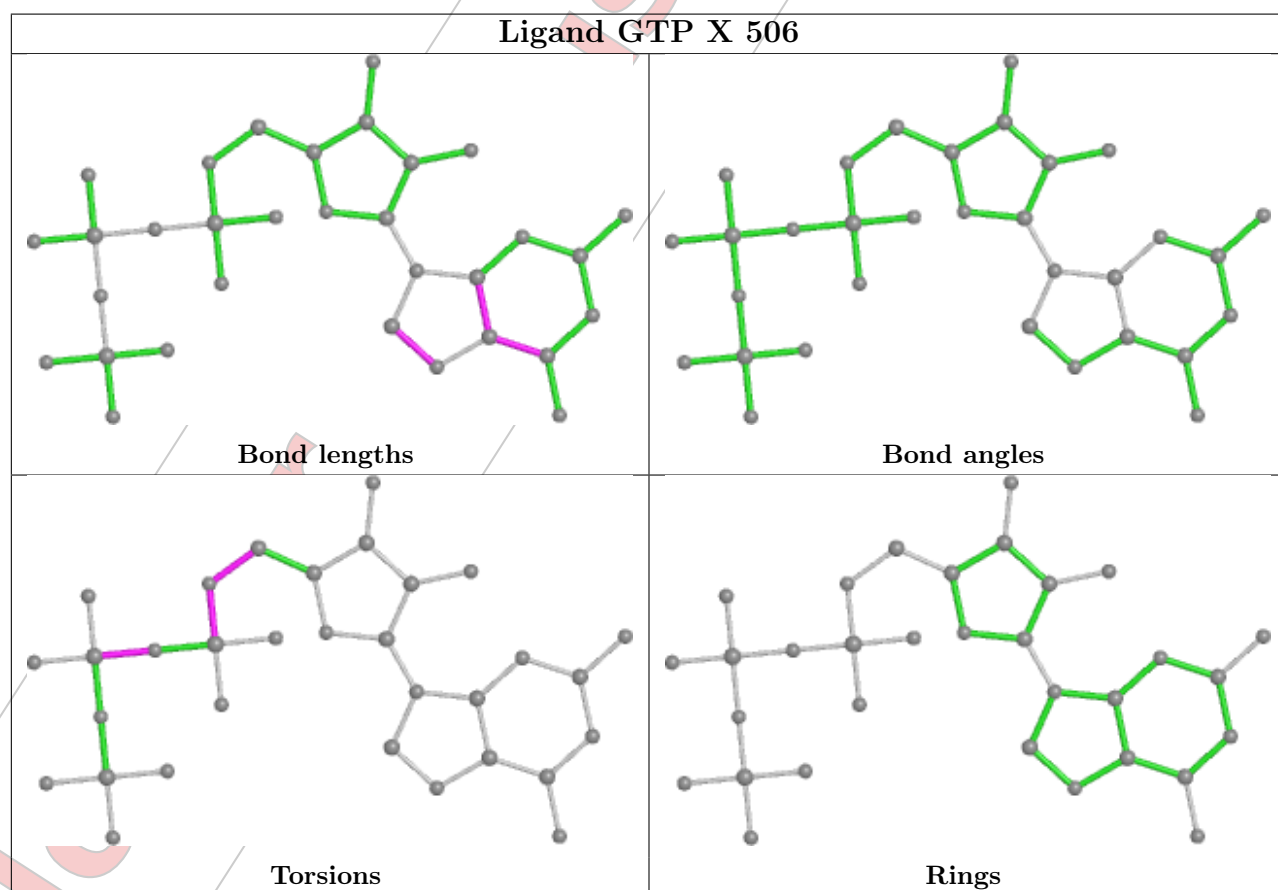

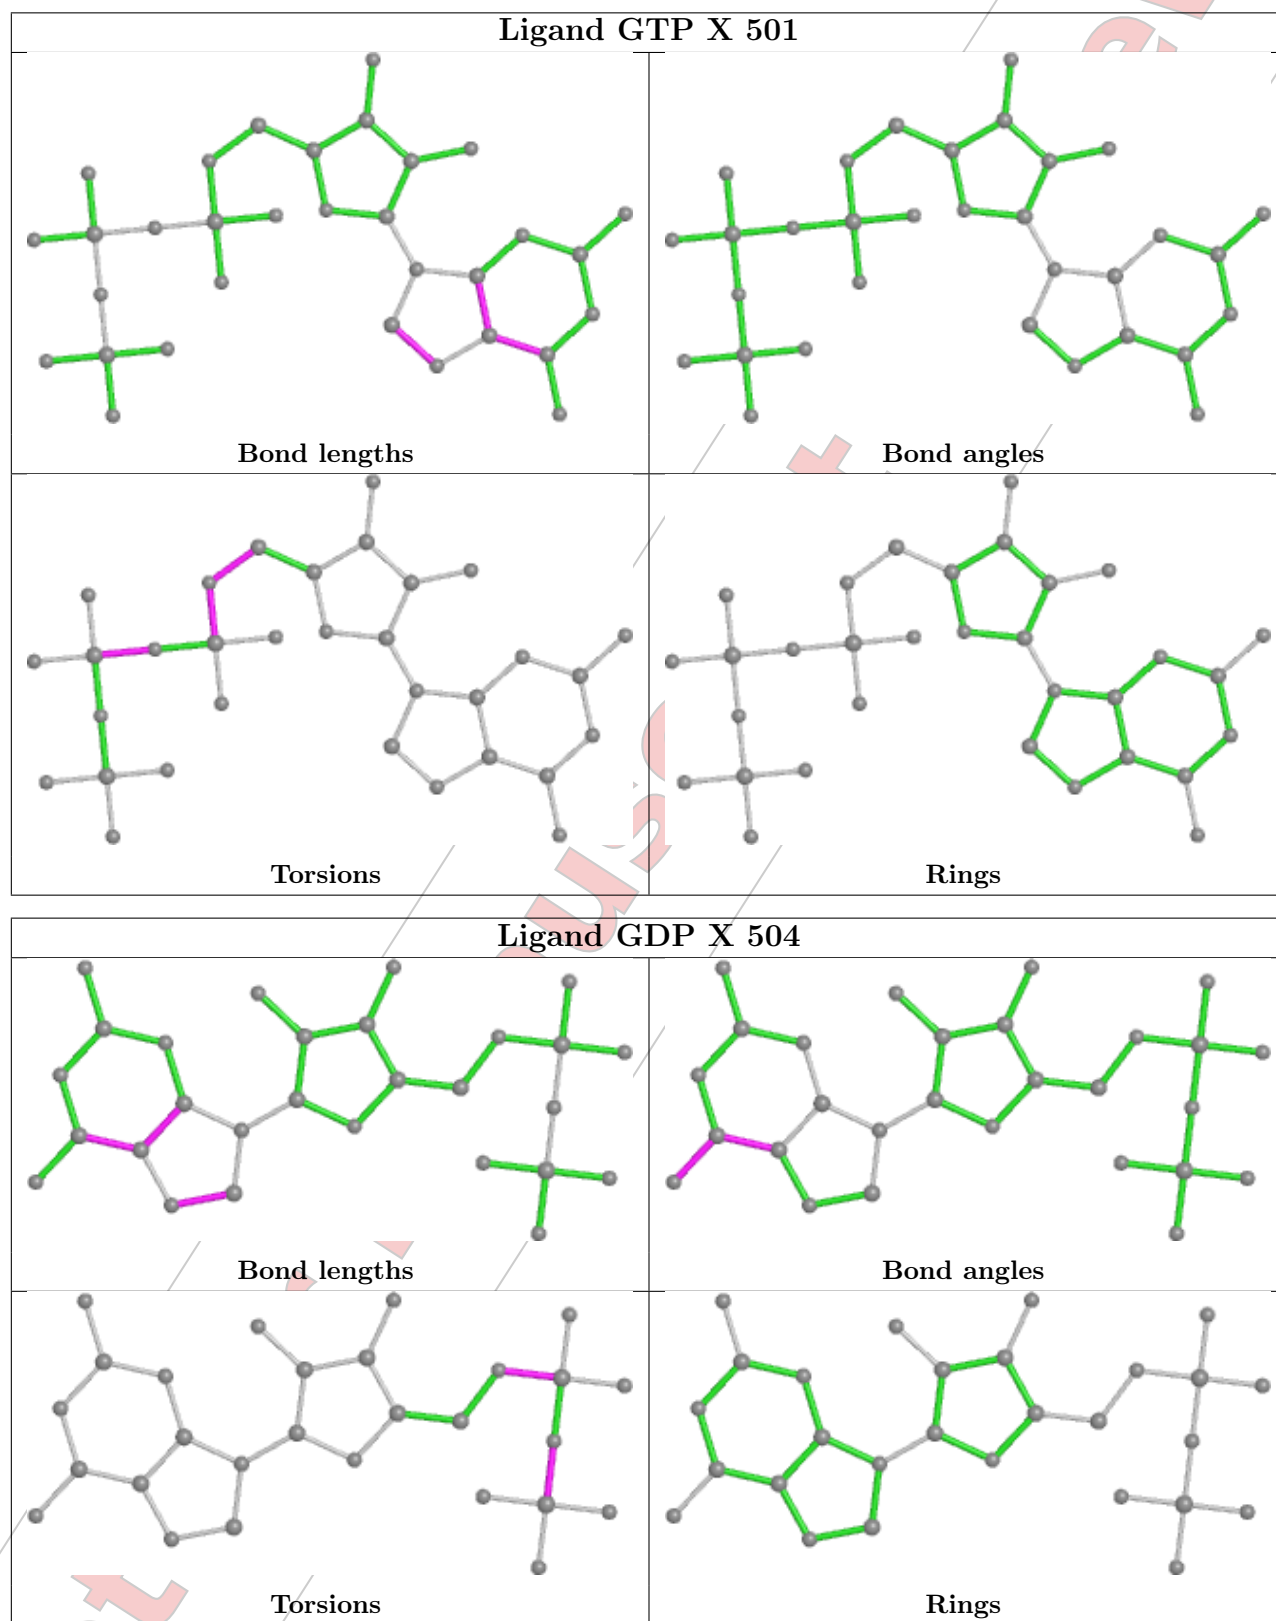

## 5.7 Other polymers [\(i\)](#)

There are no such residues in this entry.

## 5.8 Polymer linkage issues [i](#)

The following chains have linkage breaks:

| Mol | Chain | Number of breaks |
|-----|-------|------------------|
| 6   | F     | 4                |
| 5   | E     | 1                |
| 4   | D     | 1                |

All chain breaks are listed below:

| Model | Chain | Residue-1 | Atom-1 | Residue-2 | Atom-2 | Distance (Å) |
|-------|-------|-----------|--------|-----------|--------|--------------|
| 1     | E     | 28:SER    | C      | 44:ASP    | N      | 32.06        |
| 1     | F     | 362:ALA   | C      | 372:THR   | N      | 20.68        |
| 1     | F     | 103:THR   | C      | 126:ASP   | N      | 11.71        |
| 1     | D     | 273:LEU   | C      | 284:LEU   | N      | 11.29        |
| 1     | F     | 247:LYS   | C      | 252:ASN   | N      | 9.41         |
| 1     | F     | 150:LYS   | C      | 160:ILE   | N      | 6.42         |

## 6 Fit of model and data [i](#)

### 6.1 Protein, DNA and RNA chains [i](#)

Unable to reproduce the depositors R factor - this section is therefore empty.

### 6.2 Non-standard residues in protein, DNA, RNA chains [i](#)

Unable to reproduce the depositors R factor - this section is therefore empty.

### 6.3 Carbohydrates [i](#)

Unable to reproduce the depositors R factor - this section is therefore empty.

### 6.4 Ligands [i](#)

Unable to reproduce the depositors R factor - this section is therefore empty.

The following is a graphical depiction of the model fit to experimental electron density of all instances of the Ligand of Interest. In addition, ligands with molecular weight > 250 and outliers as shown on the geometry validation Tables will also be included. Each fit is shown from different orientation to approximate a three-dimensional view.

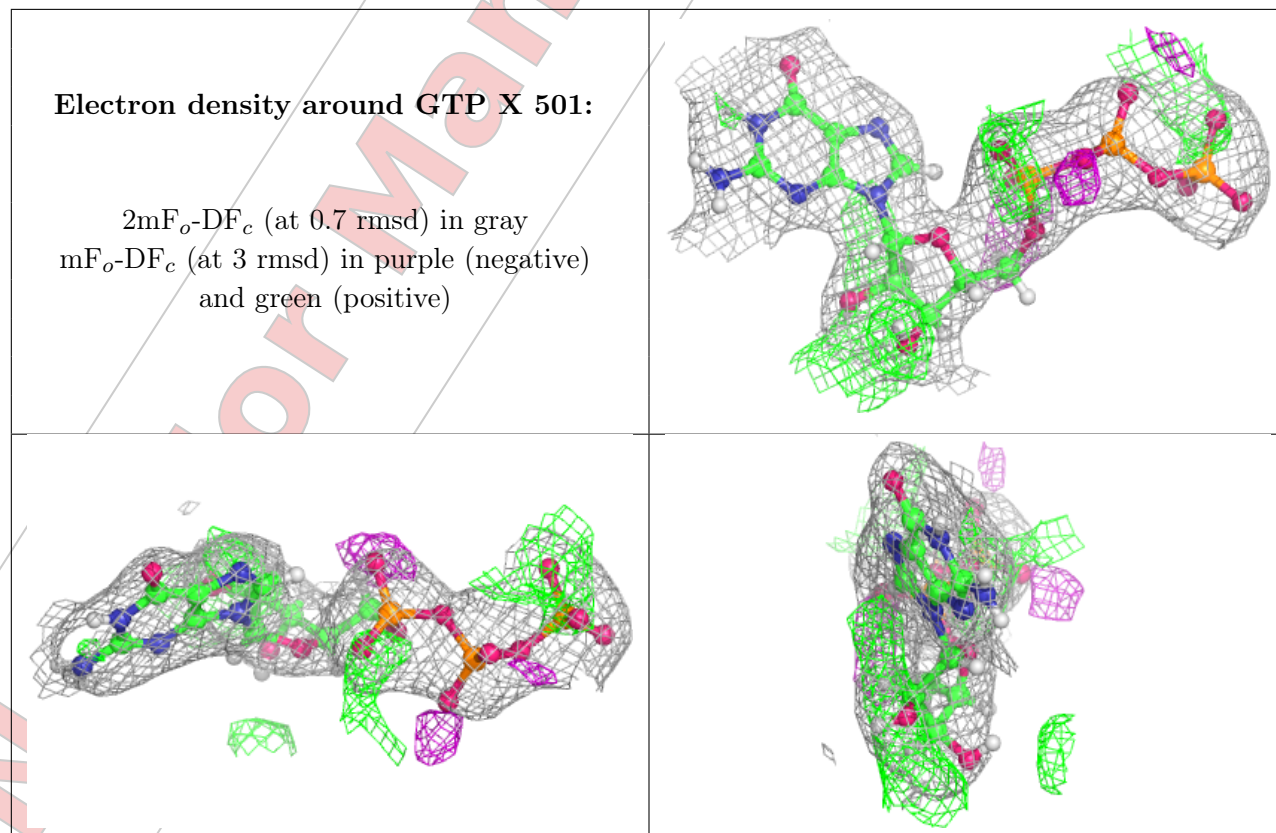

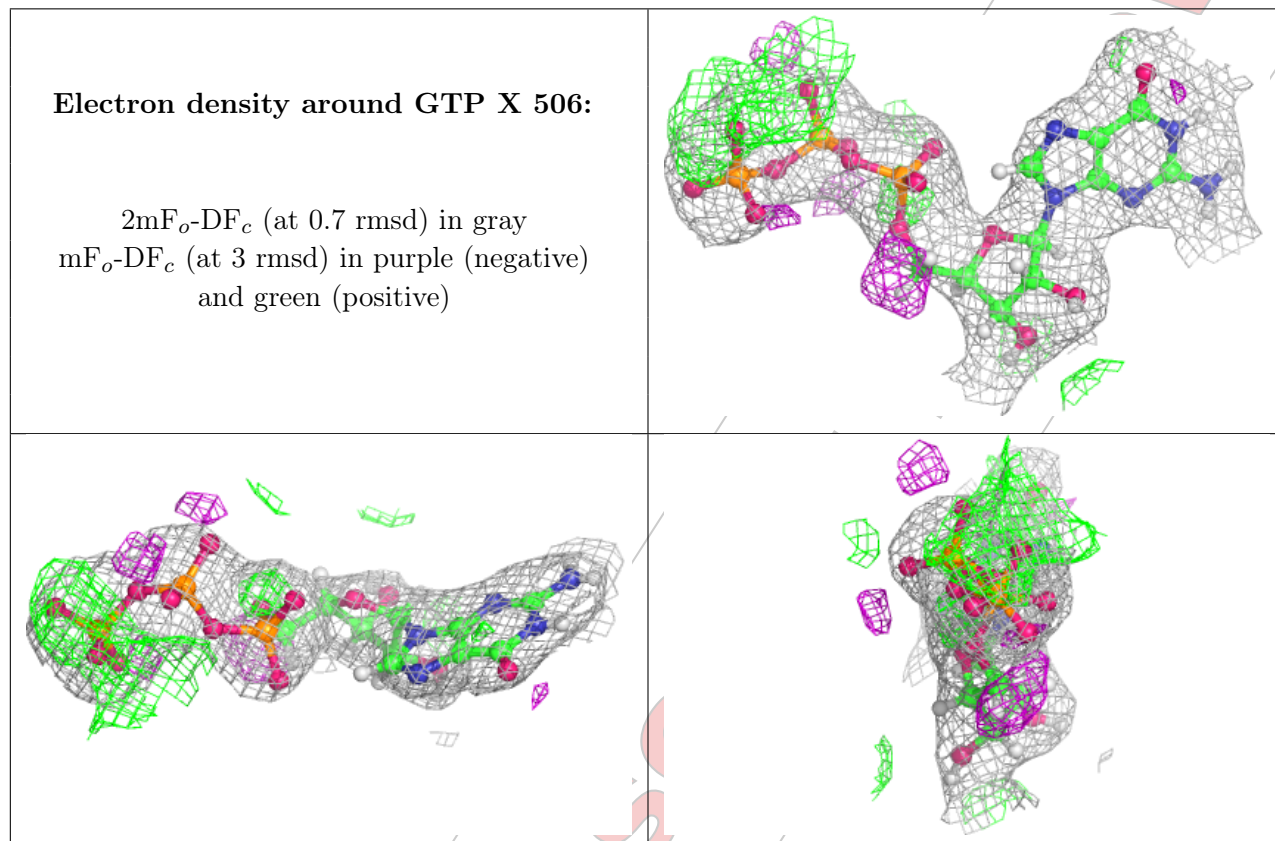

Not For Manuscript

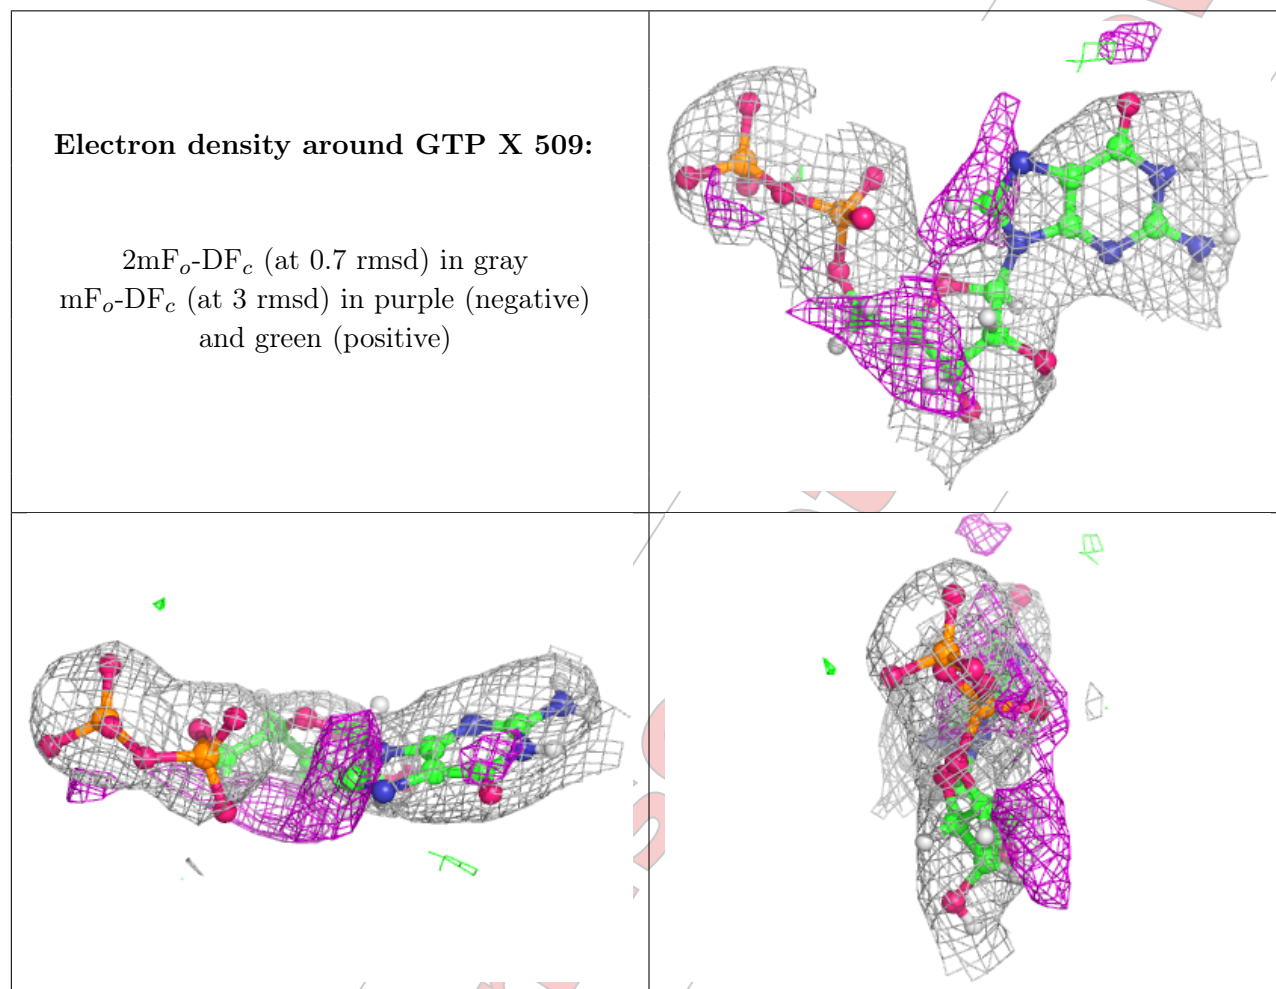

Not For Manu

**Electron density around GDP X 504:**

$2mF_o-DF_c$  (at 0.7 rmsd) in gray  
 $mF_o-DF_c$  (at 3 rmsd) in purple (negative)  
and green (positive)

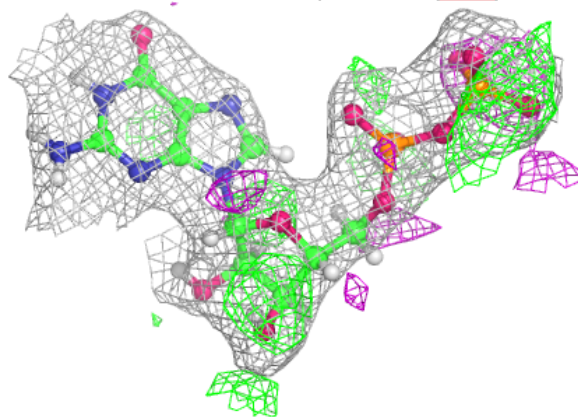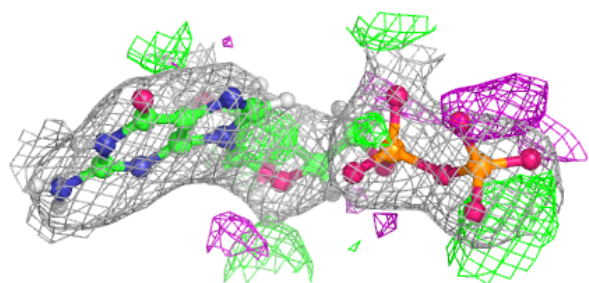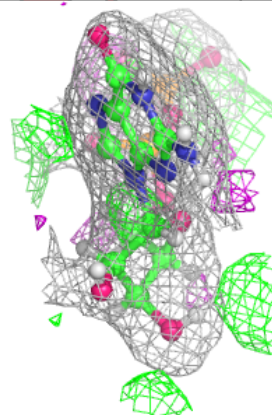

Not For Manuscript

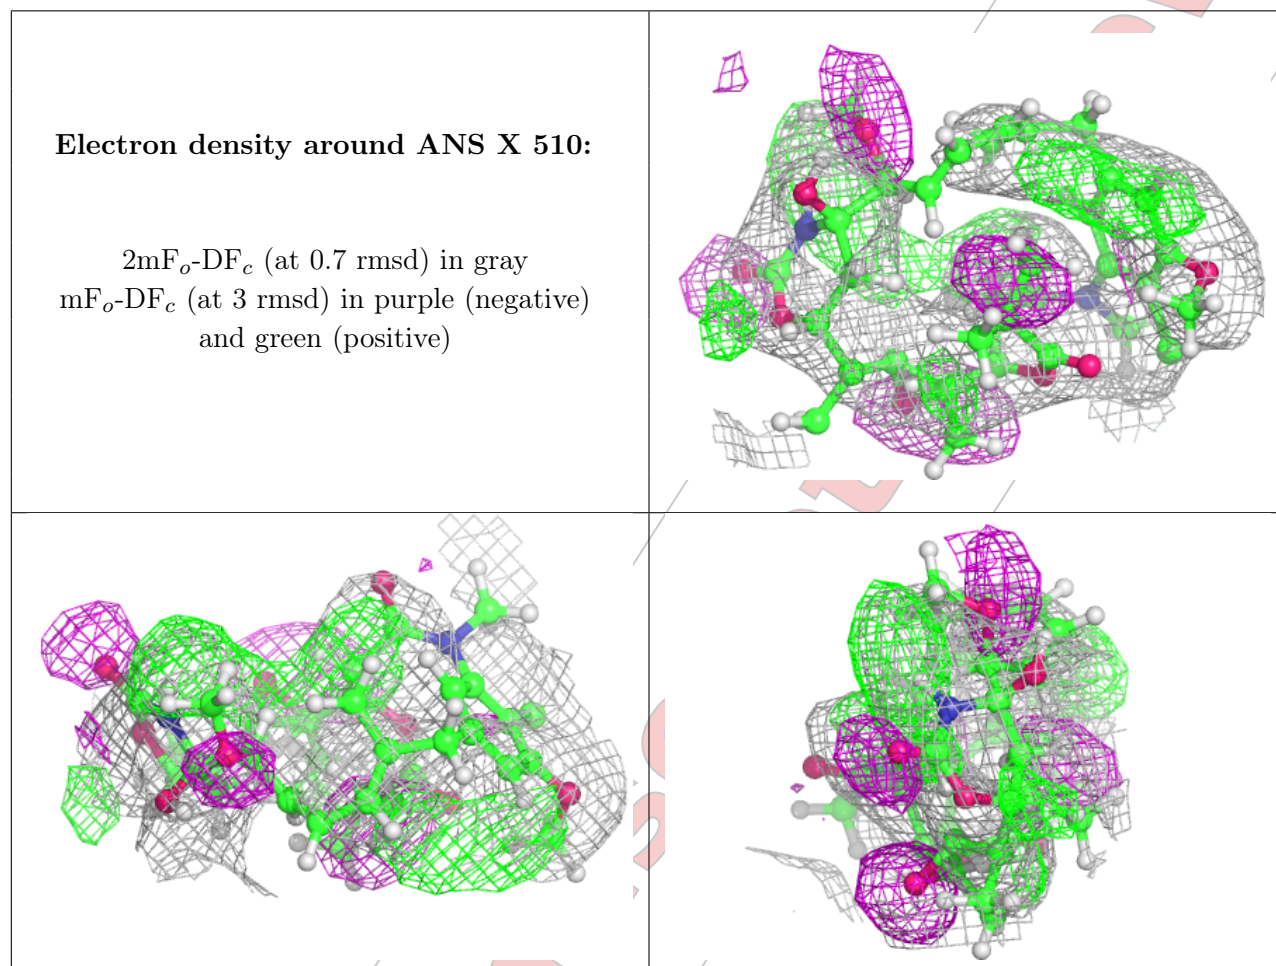

Not For Man

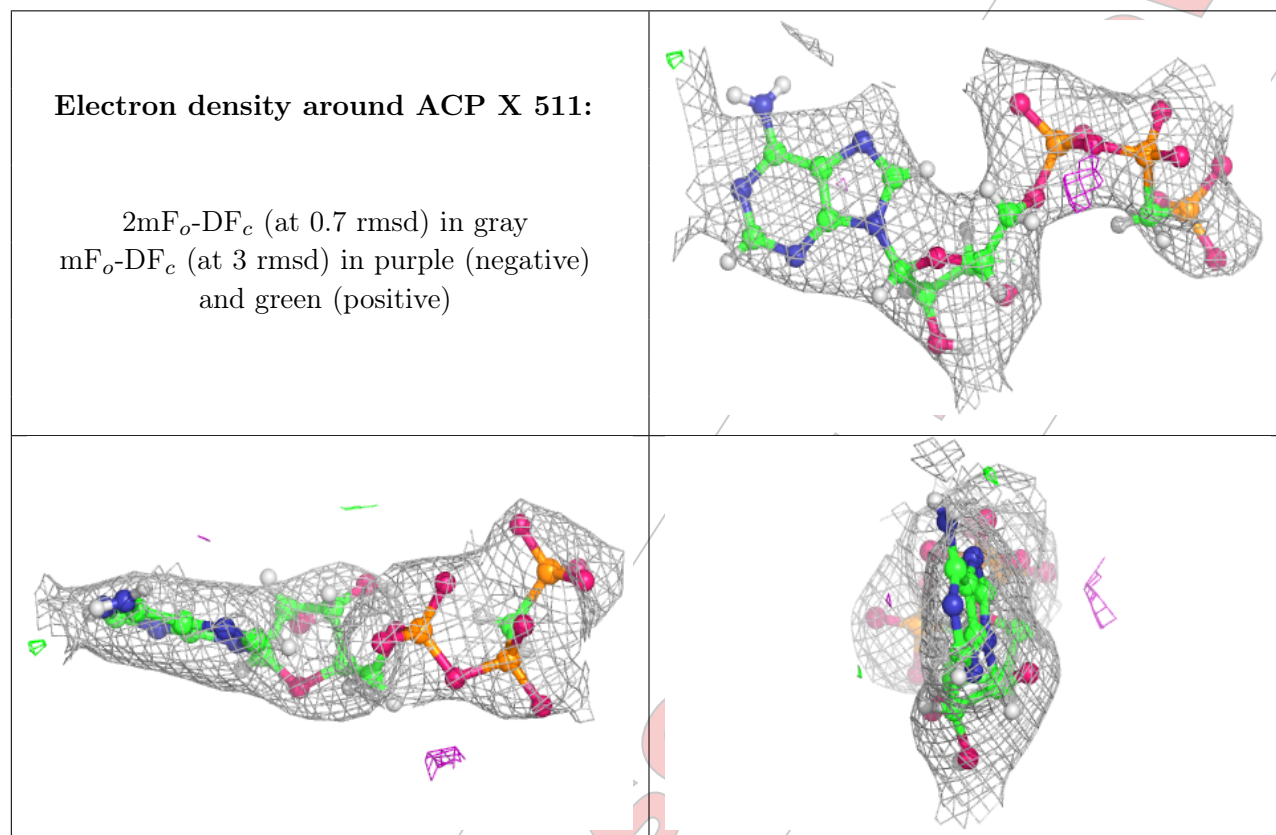

## 6.5 Other polymers [i](#)

Unable to reproduce the depositor's R factor - this section is therefore empty.

Not For Manuscript



# Preliminary Full wwPDB X-ray Structure Validation Report ⓘ

Feb 15, 2023 – 09:54 pm GMT

Deposition ID : D\_1292128635

**This wwPDB validation report is NOT for manuscript review**

This is a Preliminary Full wwPDB X-ray Structure Validation Report.

This report is produced by the wwPDB Deposition System during initial deposition but before annotation of the structure.

We welcome your comments at [validation@mail.wwpdb.org](mailto:validation@mail.wwpdb.org)

A user guide is available at

<https://www.wwpdb.org/validation/2017/XrayValidationReportHelp>

with specific help available everywhere you see the ⓘ symbol.

The types of validation reports are described at

<http://www.wwpdb.org/validation/2017/FAQs#types>.

---

The following versions of software and data (see [references ⓘ](#)) were used in the production of this report:

|                                |   |                                                                    |
|--------------------------------|---|--------------------------------------------------------------------|
| MolProbity                     | : | 4.02b-467                                                          |
| Mogul                          | : | 1.8.4, CSD as541be (2020)                                          |
| Xtriage (Phenix)               | : | 1.13                                                               |
| EDS                            | : | 2.32.1                                                             |
| buster-report                  | : | 1.1.7 (2018)                                                       |
| Percentile statistics          | : | 20191225.v01 (using entries in the PDB archive December 25th 2019) |
| Refmac                         | : | 5.8.0158                                                           |
| CCP4                           | : | 7.0.044 (Gargrove)                                                 |
| Ideal geometry (proteins)      | : | Engh & Huber (2001)                                                |
| Ideal geometry (DNA, RNA)      | : | Parkinson et al. (1996)                                            |
| Validation Pipeline (wwPDB-VP) | : | 2.32.1                                                             |

# 1 Overall quality at a glance i

The following experimental techniques were used to determine the structure:

*X-RAY DIFFRACTION*

The reported resolution of this entry is 3.20 Å.

Percentile scores (ranging between 0-100) for global validation metrics of the entry are shown in the following graphic. The table shows the number of entries on which the scores are based.

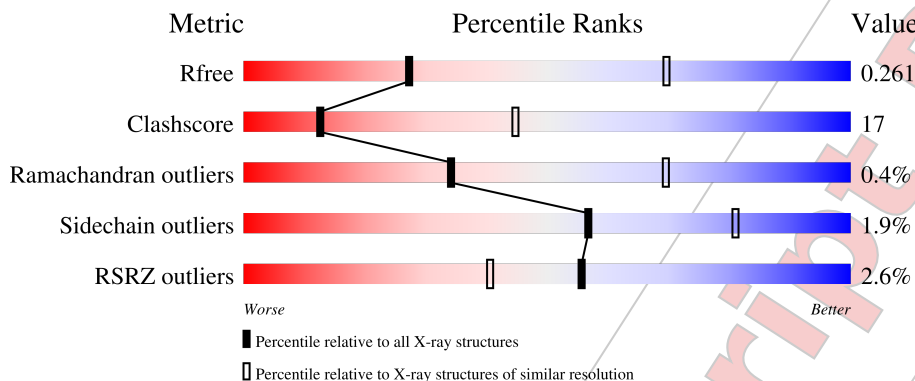

| Metric                | Whole archive<br>(#Entries) | Similar resolution<br>(#Entries, resolution range(Å)) |
|-----------------------|-----------------------------|-------------------------------------------------------|
| $R_{free}$            | 130704                      | 1133 (3.20-3.20)                                      |
| Clashscore            | 141614                      | 1253 (3.20-3.20)                                      |
| Ramachandran outliers | 138981                      | 1234 (3.20-3.20)                                      |
| Sidechain outliers    | 138945                      | 1233 (3.20-3.20)                                      |
| RSRZ outliers         | 127900                      | 1095 (3.20-3.20)                                      |

The table below summarises the geometric issues observed across the polymeric chains and their fit to the electron density. The red, orange, yellow and green segments of the lower bar indicate the fraction of residues that contain outliers for  $\geq 3$ , 2, 1 and 0 types of geometric quality criteria respectively. A grey segment represents the fraction of residues that are not modelled. The numeric value for each fraction is indicated below the corresponding segment, with a dot representing fractions  $\leq 5\%$ . The upper red bar (where present) indicates the fraction of residues that have poor fit to the electron density. The numeric value is given above the bar.

| Mol | Chain | Length | Quality of chain |
|-----|-------|--------|------------------|
| 1   | A     | 439    | <br>3% 69% 30%   |
| 2   | C     | 440    | <br>65% 33%      |
| 3   | D     | 424    | <br>3% 63% 37%   |
| 4   | E     | 120    | <br>3% 76% 24%   |

Continued on next page...

*Continued from previous page...*

| Mol | Chain | Length | Quality of chain  |
|-----|-------|--------|-------------------|
| 5   | F     | 331    | <p>9% 64% 33%</p> |
| 6   | B     | 428    | <p>75% 25%</p>    |

Not For Manuscript Review

## 2 Entry composition [i](#)

There are 12 unique types of molecules in this entry. The entry contains 17637 atoms, of which 58 are hydrogens and 0 are deuteriums.

In the tables below, the ZeroOcc column contains the number of atoms modelled with zero occupancy, the AltConf column contains the number of residues with at least one atom in alternate conformation and the Trace column contains the number of residues modelled with at most 2 atoms.

- Molecule 1 is a protein.

| Mol | Chain | Residues | Atoms |      |     |     |    | ZeroOcc | AltConf | Trace |
|-----|-------|----------|-------|------|-----|-----|----|---------|---------|-------|
|     |       |          | Total | C    | N   | O   | S  |         |         |       |
| 1   | A     | 439      | 3465  | 2200 | 584 | 657 | 24 | 5       | 9       | 0     |

- Molecule 2 is a protein.

| Mol | Chain | Residues | Atoms |      |     |     |    | ZeroOcc | AltConf | Trace |
|-----|-------|----------|-------|------|-----|-----|----|---------|---------|-------|
|     |       |          | Total | C    | N   | O   | S  |         |         |       |
| 2   | C     | 440      | 3466  | 2197 | 584 | 662 | 23 | 4       | 7       | 0     |

- Molecule 3 is a protein.

| Mol | Chain | Residues | Atoms |      |     |     |    | ZeroOcc | AltConf | Trace |
|-----|-------|----------|-------|------|-----|-----|----|---------|---------|-------|
|     |       |          | Total | C    | N   | O   | S  |         |         |       |
| 3   | D     | 424      | 3343  | 2102 | 567 | 646 | 28 | 6       | 4       | 0     |

- Molecule 4 is a protein.

| Mol | Chain | Residues | Atoms |     |     |     |   | ZeroOcc | AltConf | Trace |
|-----|-------|----------|-------|-----|-----|-----|---|---------|---------|-------|
|     |       |          | Total | C   | N   | O   | S |         |         |       |
| 4   | E     | 120      | 991   | 612 | 180 | 194 | 5 | 0       | 0       | 0     |

- Molecule 5 is a protein.

| Mol | Chain | Residues | Atoms |      |     |     |    | ZeroOcc | AltConf | Trace |
|-----|-------|----------|-------|------|-----|-----|----|---------|---------|-------|
|     |       |          | Total | C    | N   | O   | S  |         |         |       |
| 5   | F     | 331      | 2729  | 1762 | 457 | 496 | 14 | 5       | 4       | 0     |

- Molecule 6 is a protein.

| Mol | Chain | Residues | Atoms |      |     |     |    | ZeroOcc | AltConf | Trace |
|-----|-------|----------|-------|------|-----|-----|----|---------|---------|-------|
|     |       |          | Total | C    | N   | O   | S  |         |         |       |
| 6   | B     | 428      | 3370  | 2118 | 576 | 649 | 27 | 6       | 2       | 0     |

- Molecule 7 is GUANOSINE-5'-TRIPHOSPHATE (three-letter code: GTP) (formula:  $C_{10}H_{16}N_5O_{14}P_3$ ).



| Mol | Chain | Residues | Atoms |    |   |    | ZeroOcc | AltConf |   |
|-----|-------|----------|-------|----|---|----|---------|---------|---|
| 7   | X     | 1        | Total | C  | N | O  | P       | 0       | 0 |
|     |       |          | 32    | 10 | 5 | 14 | 3       |         |   |
| 7   | X     | 1        | Total | C  | N | O  | P       | 0       | 0 |
|     |       |          | 32    | 10 | 5 | 14 | 3       |         |   |

- Molecule 8 is MAGNESIUM ION (three-letter code: MG) (formula: Mg).

| Mol | Chain | Residues | Atoms |    | ZeroOcc | AltConf |
|-----|-------|----------|-------|----|---------|---------|
| 8   | X     | 1        | Total | Mg | 0       | 0       |
|     |       |          | 1     | 1  |         |         |
| 8   | X     | 1        | Total | Mg | 0       | 0       |
|     |       |          | 1     | 1  |         |         |

- Molecule 9 is CALCIUM ION (three-letter code: CA) (formula: Ca).

| Mol | Chain | Residues | Atoms |    | ZeroOcc | AltConf |
|-----|-------|----------|-------|----|---------|---------|
| 9   | X     | 1        | Total | Ca | 0       | 0       |
|     |       |          | 1     | 1  |         |         |
| 9   | X     | 1        | Total | Ca | 0       | 0       |
|     |       |          | 1     | 1  |         |         |

- Molecule 10 is GUANOSINE-5'-DIPHOSPHATE (three-letter code: GDP) (formula:  $C_{10}H_{15}N_5O_{11}P_2$ ).

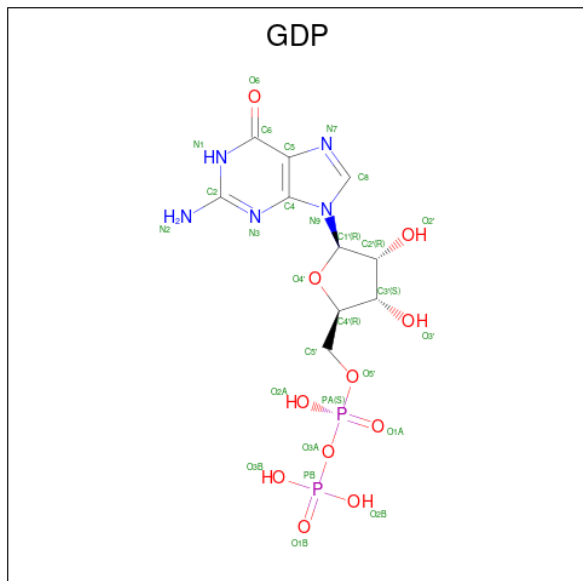

| Mol | Chain | Residues | Atoms |    |   |    | ZeroOcc | AltConf |   |
|-----|-------|----------|-------|----|---|----|---------|---------|---|
| 10  | X     | 1        | Total | C  | N | O  | P       | 0       | 0 |
|     |       |          | 28    | 10 | 5 | 11 | 2       |         |   |
| 10  | X     | 1        | Total | C  | N | O  | P       | 0       | 0 |
|     |       |          | 28    | 10 | 5 | 11 | 2       |         |   |

- Molecule 11 is (2ALPHA,2'BETA,3BETA,4ALPHA,5BETA)-VINCALEUKOBLASTINE (three-letter code: VLB) (formula: C<sub>46</sub>H<sub>58</sub>N<sub>4</sub>O<sub>9</sub>).

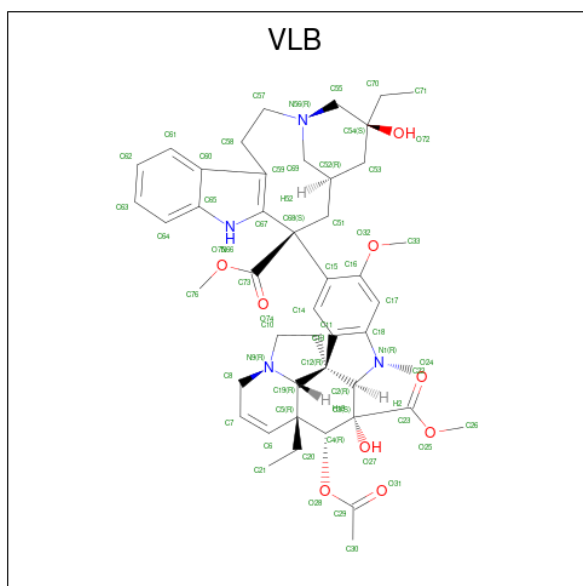

| Mol | Chain | Residues | Atoms |    |    |   | ZeroOcc | AltConf |   |
|-----|-------|----------|-------|----|----|---|---------|---------|---|
| 11  | X     | 1        | Total | C  | H  | N | O       | 0       | 0 |
|     |       |          | 117   | 46 | 58 | 4 | 9       |         |   |

- Molecule 12 is water.

| Mol | Chain | Residues | Atoms            | ZeroOcc | AltConf |
|-----|-------|----------|------------------|---------|---------|
| 12  | S     | 32       | Total O<br>32 32 | 0       | 0       |

Not For Manuscript Review

### 3 Residue-property plots

These plots are drawn for all protein, RNA, DNA and oligosaccharide chains in the entry. The first graphic for a chain summarises the proportions of the various outlier classes displayed in the second graphic. The second graphic shows the sequence view annotated by issues in geometry and electron density. Residues are color-coded according to the number of geometric quality criteria for which they contain at least one outlier: green = 0, yellow = 1, orange = 2 and red = 3 or more. A red dot above a residue indicates a poor fit to the electron density ( $RSRZ > 2$ ). Stretches of 2 or more consecutive residues without any outlier are shown as a green connector. Residues present in the sample, but not in the model, are shown in grey.

• Molecule 1:

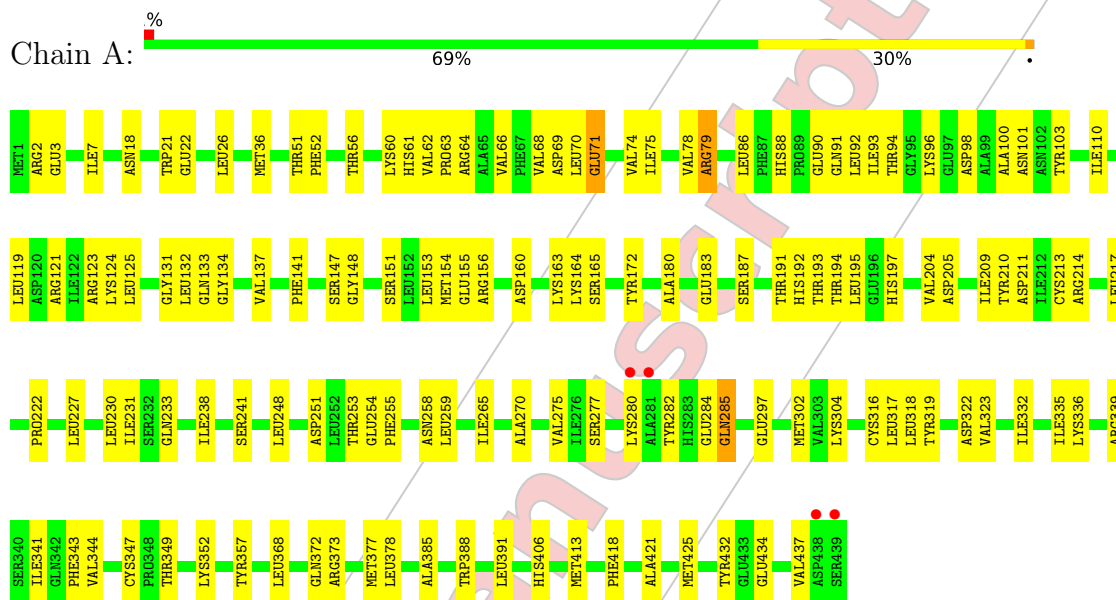

• Molecule 2:

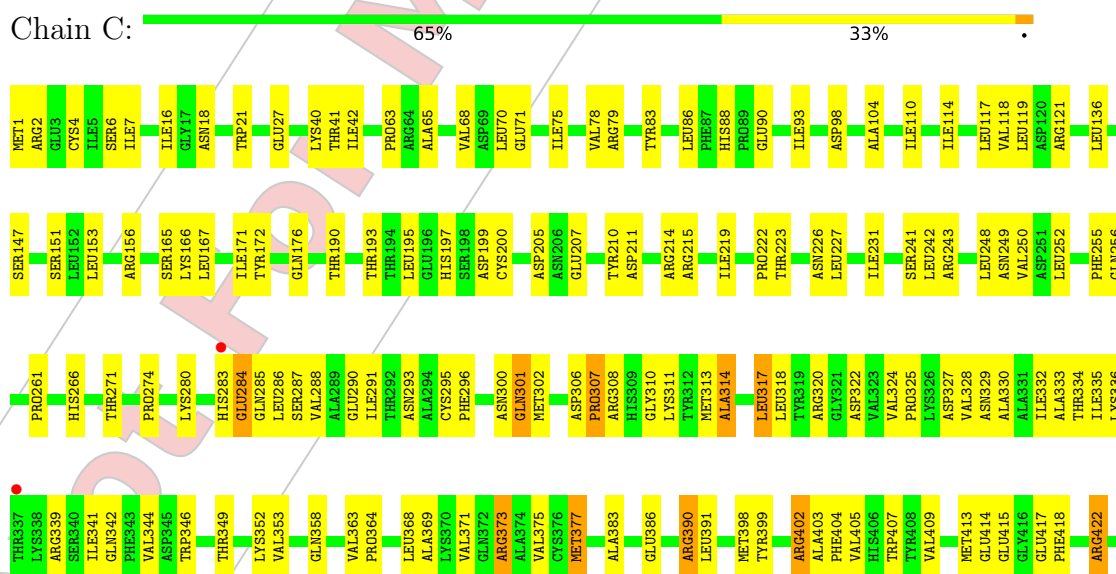

LYS430  
ASP431  
TYR432  
GLU433  
VAL434  
VAL435  
GLY436  
VAL437  
SER438  
VAL440

• Molecule 3:

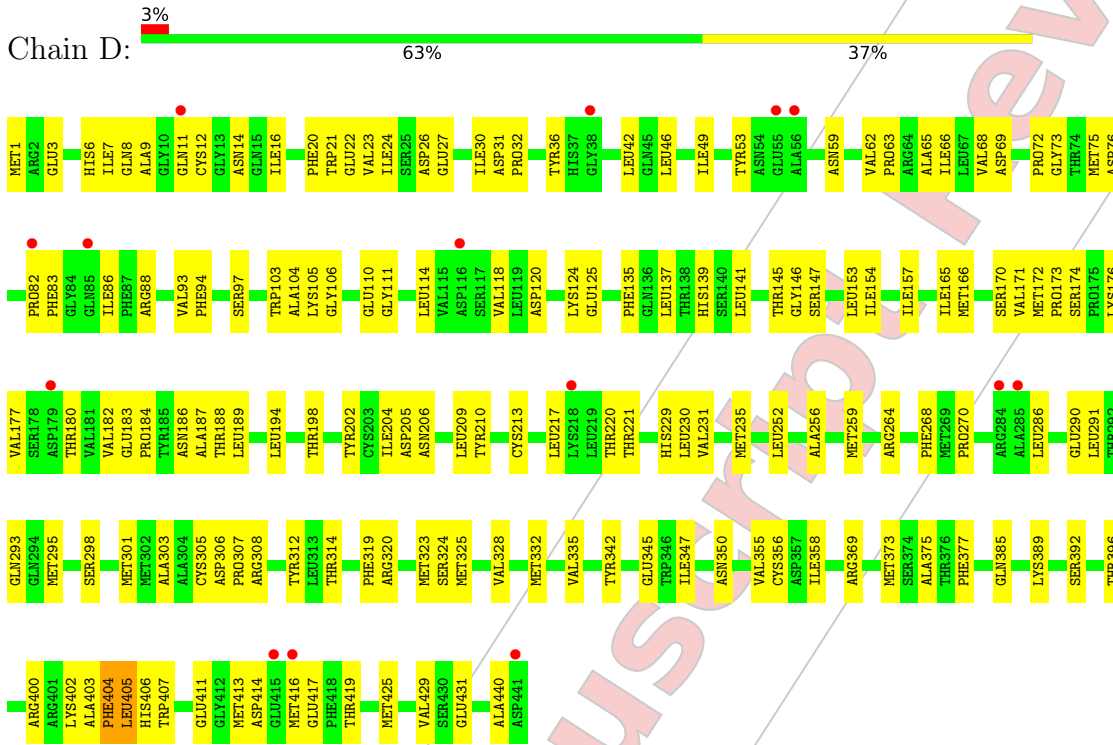

• Molecule 4:

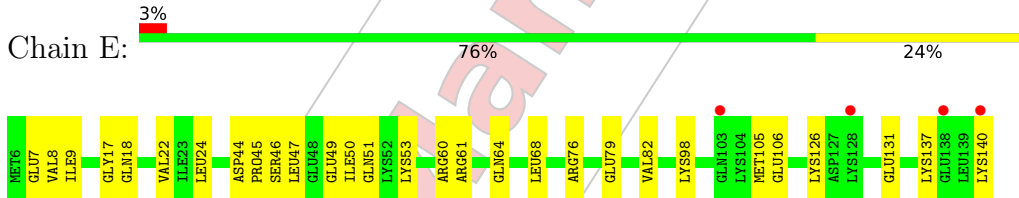

• Molecule 5:

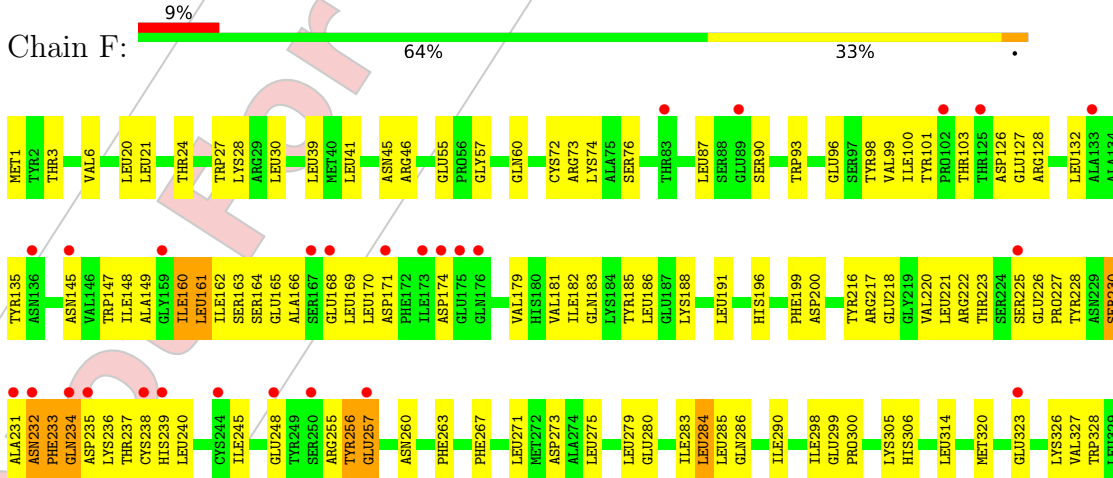

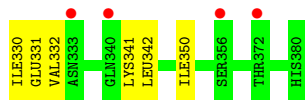

• Molecule 6:

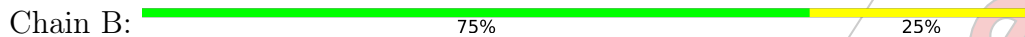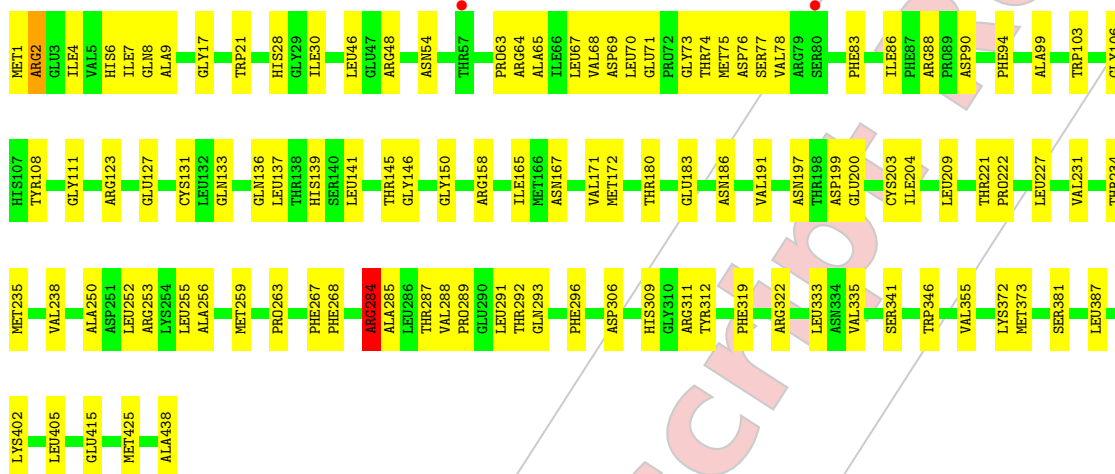

## 4 Data and refinement statistics i

| Property                                                                | Value                                                       | Source           |
|-------------------------------------------------------------------------|-------------------------------------------------------------|------------------|
| Space group                                                             | P 21 21 21                                                  | Depositor        |
| Cell constants<br>a, b, c, $\alpha$ , $\beta$ , $\gamma$                | 106.39Å 159.74Å 182.24Å<br>90.00° 90.00° 90.00°             | Depositor        |
| Resolution (Å)                                                          | 15.13 – 3.20<br>15.13 – 2.50                                | Depositor<br>EDS |
| % Data completeness<br>(in resolution range)                            | 99.9 (15.13-3.20)<br>76.0 (15.13-2.50)                      | Depositor<br>EDS |
| $R_{merge}$                                                             | (Not available)                                             | Depositor        |
| $R_{sym}$                                                               | (Not available)                                             | Depositor        |
| $\langle I/\sigma(I) \rangle$ <sup>1</sup>                              | 0.79 (at 2.51Å)                                             | Xtrriage         |
| Refinement program                                                      | .                                                           | Depositor        |
| R, $R_{free}$                                                           | 0.200 , 0.248<br>0.217 , 0.261                              | Depositor<br>DCC |
| $R_{free}$ test set                                                     | 1999 reflections (2.46%)                                    | wwPDB-VP         |
| Wilson B-factor (Å <sup>2</sup> )                                       | 69.5                                                        | Xtrriage         |
| Anisotropy                                                              | 0.051                                                       | Xtrriage         |
| Bulk solvent $k_{sol}$ (e/Å <sup>3</sup> ), $B_{sol}$ (Å <sup>2</sup> ) | 0.36 , 75.9                                                 | EDS              |
| L-test for twinning <sup>2</sup>                                        | $\langle  L  \rangle = 0.48$ , $\langle L^2 \rangle = 0.31$ | Xtrriage         |
| Estimated twinning fraction                                             | No twinning to report.                                      | Xtrriage         |
| $F_o, F_c$ correlation                                                  | 0.92                                                        | EDS              |
| Total number of atoms                                                   | 17637                                                       | wwPDB-VP         |
| Average B, all atoms (Å <sup>2</sup> )                                  | 74.0                                                        | wwPDB-VP         |

Xtrriage's analysis on translational NCS is as follows: *The largest off-origin peak in the Patterson function is 2.90% of the height of the origin peak. No significant pseudotranslation is detected.*

<sup>1</sup>Intensities estimated from amplitudes.

<sup>2</sup>Theoretical values of  $\langle |L| \rangle$ ,  $\langle L^2 \rangle$  for centric reflections are 0.5, 0.333 respectively for untwinned datasets, and 0.375, 0.2 for perfectly twinned datasets.

## 5 Model quality [i](#)

### 5.1 Standard geometry [i](#)

Bond lengths and bond angles in the following residue types are not validated in this section: VLB, GDP, MG, GTP, CA

The Z score for a bond length (or angle) is the number of standard deviations the observed value is removed from the expected value. A bond length (or angle) with  $|Z| > 5$  is considered an outlier worth inspection. RMSZ is the root-mean-square of all Z scores of the bond lengths (or angles).

| Mol | Chain | Bond lengths |         | Bond angles |         |
|-----|-------|--------------|---------|-------------|---------|
|     |       | RMSZ         | # Z  >5 | RMSZ        | # Z  >5 |
| 1   | A     | 0.32         | 0/3571  | 0.59        | 0/4849  |
| 2   | C     | 0.47         | 0/3565  | 0.66        | 0/4842  |
| 3   | D     | 0.32         | 0/3428  | 0.59        | 0/4645  |
| 4   | E     | 0.34         | 0/999   | 0.65        | 0/1325  |
| 5   | F     | 0.38         | 0/2802  | 0.62        | 0/3789  |
| 6   | B     | 0.34         | 0/3451  | 0.63        | 0/4675  |
| All | All   | 0.37         | 0/17816 | 0.62        | 0/24125 |

Chiral center outliers are detected by calculating the chiral volume of a chiral center and verifying if the center is modelled as a planar moiety or with the opposite hand. A planarity outlier is detected by checking planarity of atoms in a peptide group, atoms in a mainchain group or atoms of a sidechain that are expected to be planar.

| Mol | Chain | #Chirality outliers | #Planarity outliers |
|-----|-------|---------------------|---------------------|
| 1   | A     | 0                   | 1                   |
| 2   | C     | 0                   | 5                   |
| 6   | B     | 0                   | 1                   |
| All | All   | 0                   | 7                   |

There are no bond length outliers.

There are no bond angle outliers.

There are no chirality outliers.

All (7) planarity outliers are listed below:

| Mol | Chain | Res | Type | Group     |
|-----|-------|-----|------|-----------|
| 1   | A     | 79  | ARG  | Sidechain |
| 6   | B     | 284 | ARG  | Sidechain |
| 2   | C     | 243 | ARG  | Sidechain |
| 2   | C     | 373 | ARG  | Sidechain |

*Continued on next page...*

Continued from previous page...

| Mol | Chain | Res | Type | Group     |
|-----|-------|-----|------|-----------|
| 2   | C     | 390 | ARG  | Sidechain |
| 2   | C     | 402 | ARG  | Sidechain |
| 2   | C     | 422 | ARG  | Sidechain |

## 5.2 Too-close contacts [i](#)

In the following table, the Non-H and H(model) columns list the number of non-hydrogen atoms and hydrogen atoms in the chain respectively. The H(added) column lists the number of hydrogen atoms added and optimized by MolProbity. The Clashes column lists the number of clashes within the asymmetric unit, whereas Symm-Clashes lists symmetry-related clashes.

| Mol | Chain | Non-H | H(model) | H(added) | Clashes | Symm-Clashes |
|-----|-------|-------|----------|----------|---------|--------------|
| 1   | A     | 3465  | 0        | 3402     | 121     | 0            |
| 2   | C     | 3466  | 0        | 3393     | 120     | 1            |
| 3   | D     | 3343  | 0        | 3231     | 139     | 0            |
| 4   | E     | 991   | 0        | 1012     | 27      | 1            |
| 5   | F     | 2729  | 0        | 2715     | 92      | 0            |
| 6   | B     | 3370  | 0        | 3250     | 85      | 0            |
| 7   | X     | 64    | 0        | 24       | 1       | 0            |
| 8   | X     | 2     | 0        | 0        | 0       | 0            |
| 9   | X     | 2     | 0        | 0        | 0       | 0            |
| 10  | X     | 56    | 0        | 24       | 4       | 0            |
| 11  | X     | 59    | 58       | 58       | 15      | 0            |
| 12  | S     | 32    | 0        | 0        | 3       | 0            |
| All | All   | 17579 | 58       | 17109    | 577     | 1            |

The all-atom clashscore is defined as the number of clashes found per 1000 atoms (including hydrogen atoms). The all-atom clashscore for this structure is 17.

All (577) close contacts within the same asymmetric unit are listed below, sorted by their clash magnitude.

| Atom-1           | Atom-2           | Interatomic distance (Å) | Clash overlap (Å) |
|------------------|------------------|--------------------------|-------------------|
| 1:A:277:SER:HB3  | 1:A:280:LYS:HG3  | 1.35                     | 1.07              |
| 6:B:2:ARG:HD3    | 6:B:133:GLN:HG2  | 1.41                     | 1.02              |
| 3:D:141:LEU:HD11 | 3:D:170:SER:HB3  | 1.46                     | 0.95              |
| 5:F:233:PHE:HA   | 5:F:239:HIS:CE1  | 2.02                     | 0.95              |
| 3:D:402:LYS:HE3  | 3:D:405:LEU:CD1  | 1.97                     | 0.94              |
| 5:F:132:LEU:HD21 | 5:F:170:LEU:HD11 | 1.50                     | 0.94              |
| 5:F:263:PHE:HE2  | 5:F:341:LYS:HD3  | 1.34                     | 0.93              |
| 2:C:293:ASN:HA   | 2:C:335:ILE:HD11 | 1.50                     | 0.93              |

Continued on next page...

Continued from previous page...

| Atom-1           | Atom-2            | Interatomic distance (Å) | Clash overlap (Å) |
|------------------|-------------------|--------------------------|-------------------|
| 3:D:402:LYS:HG3  | 3:D:405:LEU:HD13  | 1.53                     | 0.91              |
| 1:A:317:LEU:HD21 | 1:A:377:MET:HE2   | 1.53                     | 0.91              |
| 3:D:402:LYS:CG   | 3:D:405:LEU:HD13  | 2.03                     | 0.89              |
| 2:C:88:HIS:NE2   | 2:C:90:GLU:HG3    | 1.88                     | 0.89              |
| 2:C:274:PRO:HG2  | 2:C:371:VAL:HG11  | 1.54                     | 0.88              |
| 5:F:226:GLU:HG3  | 5:F:227:PRO:HD2   | 1.57                     | 0.86              |
| 3:D:402:LYS:HE3  | 3:D:405:LEU:HD11  | 1.58                     | 0.86              |
| 3:D:402:LYS:CE   | 3:D:405:LEU:HD11  | 2.06                     | 0.86              |
| 3:D:402:LYS:CE   | 3:D:405:LEU:CD1   | 2.55                     | 0.84              |
| 4:E:126:LYS:HE2  | 4:E:126:LYS:HA    | 1.59                     | 0.84              |
| 6:B:221:THR:HA   | 11:X:505:VLB:H761 | 1.59                     | 0.83              |
| 2:C:176:GLN:HE22 | 2:C:207:GLU:HG3   | 1.42                     | 0.83              |
| 2:C:328:VAL:HG11 | 2:C:353:VAL:HG11  | 1.60                     | 0.83              |
| 3:D:298:SER:HB2  | 3:D:307:PRO:HD2   | 1.60                     | 0.82              |
| 1:A:70:LEU:HD13  | 1:A:110:ILE:HG21  | 1.61                     | 0.82              |
| 6:B:285:ALA:HB2  | 6:B:372:LYS:HE3   | 1.60                     | 0.82              |
| 1:A:277:SER:HB3  | 1:A:280:LYS:CG    | 2.10                     | 0.80              |
| 2:C:430:LYS:HE2  | 2:C:434:GLU:OE2   | 1.82                     | 0.79              |
| 2:C:93:ILE:HD11  | 2:C:121:ARG:HG3   | 1.65                     | 0.78              |
| 5:F:326:LYS:HE2  | 5:F:328:TRP:CZ2   | 2.18                     | 0.78              |
| 3:D:20:PHE:HB2   | 3:D:235:MET:CE    | 2.13                     | 0.78              |
| 1:A:357:TYR:CE2  | 4:E:17:GLY:HA2    | 2.18                     | 0.77              |
| 5:F:257:GLU:HB3  | 5:F:260:ASN:HA    | 1.65                     | 0.77              |
| 1:A:210:TYR:CE2  | 1:A:214:ARG:HD2   | 2.19                     | 0.76              |
| 5:F:20:LEU:O     | 5:F:24:THR:HG23   | 1.85                     | 0.76              |
| 1:A:317:LEU:HD21 | 1:A:377:MET:CE    | 2.16                     | 0.75              |
| 1:A:132:LEU:O    | 1:A:164:LYS:HE3   | 1.86                     | 0.75              |
| 1:A:209:ILE:HD11 | 1:A:302:MET:HE3   | 1.67                     | 0.75              |
| 1:A:154:MET:HG3  | 1:A:194:THR:HG23  | 1.68                     | 0.74              |
| 3:D:319:PHE:HB3  | 3:D:323:MET:CE    | 2.17                     | 0.74              |
| 1:A:209:ILE:HD11 | 1:A:302:MET:CE    | 2.18                     | 0.74              |
| 3:D:26:ASP:OD2   | 3:D:369:ARG:HD2   | 1.88                     | 0.74              |
| 3:D:345:GLU:HG2  | 3:D:440:ALA:HB2   | 1.70                     | 0.73              |
| 6:B:83:PHE:O     | 6:B:86:ILE:HG12   | 1.89                     | 0.72              |
| 6:B:221:THR:HA   | 11:X:505:VLB:C76  | 2.19                     | 0.72              |
| 1:A:277:SER:HB3  | 1:A:280:LYS:HE3   | 1.72                     | 0.72              |
| 2:C:386:GLU:O    | 2:C:390:ARG:HG3   | 1.90                     | 0.72              |
| 2:C:329:ASN:HD21 | 11:X:505:VLB:H66  | 1.36                     | 0.71              |
| 1:A:137:VAL:HG21 | 1:A:154:MET:HE1   | 1.72                     | 0.71              |
| 1:A:154:MET:HE2  | 1:A:154:MET:HA    | 1.72                     | 0.71              |
| 6:B:165:ILE:HG21 | 6:B:252:LEU:HB3   | 1.71                     | 0.71              |

Continued on next page...

Continued from previous page...

| Atom-1           | Atom-2            | Interatomic distance (Å) | Clash overlap (Å) |
|------------------|-------------------|--------------------------|-------------------|
| 3:D:166:MET:HE3  | 3:D:166:MET:HA    | 1.71                     | 0.71              |
| 6:B:83:PHE:HD2   | 6:B:86:ILE:HD13   | 1.55                     | 0.71              |
| 1:A:209:ILE:HG23 | 1:A:230:LEU:HD23  | 1.73                     | 0.71              |
| 2:C:271:THR:HG21 | 2:C:295:CYS:HA    | 1.72                     | 0.70              |
| 1:A:62:VAL:HG23  | 1:A:86:LEU:O      | 1.91                     | 0.70              |
| 5:F:305:LYS:HG2  | 5:F:306:HIS:CD2   | 2.26                     | 0.70              |
| 1:A:119:LEU:HD11 | 1:A:156:ARG:HB3   | 1.73                     | 0.70              |
| 1:A:332:ILE:O    | 1:A:335:ILE:HG13  | 1.91                     | 0.70              |
| 3:D:259:MET:HE2  | 3:D:259:MET:HA    | 1.73                     | 0.70              |
| 3:D:319:PHE:HB3  | 3:D:323:MET:HE1   | 1.72                     | 0.70              |
| 1:A:56:THR:CG2   | 1:A:60:LYS:HB3    | 2.23                     | 0.69              |
| 3:D:402:LYS:CE   | 3:D:405:LEU:HD13  | 2.22                     | 0.69              |
| 3:D:406:HIS:CD2  | 3:D:407:TRP:HD1   | 2.10                     | 0.69              |
| 3:D:165:ILE:HG21 | 3:D:252:LEU:HB3   | 1.73                     | 0.69              |
| 3:D:137:LEU:HD23 | 3:D:154:ILE:HD11  | 1.75                     | 0.69              |
| 1:A:339:ARG:HB2  | 1:A:341:ILE:HD11  | 1.74                     | 0.68              |
| 2:C:332:ILE:HB   | 11:X:505:VLB:H303 | 1.76                     | 0.68              |
| 1:A:233:GLN:HG3  | 1:A:368:LEU:CD1   | 2.24                     | 0.68              |
| 1:A:277:SER:CB   | 1:A:280:LYS:HG3   | 2.18                     | 0.68              |
| 2:C:274:PRO:CG   | 2:C:371:VAL:HG11  | 2.24                     | 0.67              |
| 3:D:105:LYS:HG2  | 3:D:411:GLU:OE2   | 1.95                     | 0.67              |
| 11:X:505:VLB:C22 | 11:X:505:VLB:H262 | 2.24                     | 0.67              |
| 1:A:270:ALA:O    | 1:A:302:MET:HG2   | 1.95                     | 0.67              |
| 1:A:3:GLU:HG2    | 1:A:64:ARG:NH2    | 2.09                     | 0.66              |
| 6:B:6:HIS:CD2    | 6:B:21:TRP:HE1    | 2.13                     | 0.66              |
| 5:F:103:THR:HG22 | 5:F:174:ASP:OD1   | 1.95                     | 0.66              |
| 6:B:8:GLN:NE2    | 6:B:17:GLY:HA3    | 2.09                     | 0.66              |
| 1:A:22:GLU:O     | 1:A:26:LEU:HD13   | 1.95                     | 0.66              |
| 3:D:20:PHE:HB2   | 3:D:235:MET:HE3   | 1.76                     | 0.66              |
| 5:F:162:ILE:HD11 | 5:F:234:GLN:N     | 2.11                     | 0.66              |
| 2:C:252:LEU:HG   | 2:C:256:GLN:HE21  | 1.58                     | 0.66              |
| 2:C:318:LEU:HD12 | 2:C:318:LEU:N     | 2.11                     | 0.66              |
| 1:A:277:SER:CB   | 1:A:280:LYS:HE3   | 2.25                     | 0.66              |
| 3:D:259:MET:HE2  | 3:D:314:THR:HB    | 1.78                     | 0.66              |
| 5:F:314:LEU:HD22 | 5:F:350:ILE:HD11  | 1.76                     | 0.66              |
| 2:C:40:LYS:O     | 2:C:42:ILE:HG13   | 1.95                     | 0.66              |
| 6:B:306:ASP:HB3  | 6:B:309:HIS:ND1   | 2.11                     | 0.65              |
| 5:F:73:ARG:HB2   | 5:F:76:SER:HB2    | 1.78                     | 0.65              |
| 6:B:136:GLN:HA   | 6:B:167:ASN:O     | 1.96                     | 0.65              |
| 2:C:317:LEU:HG   | 2:C:377:MET:HG3   | 1.79                     | 0.65              |
| 2:C:322:ASP:HB3  | 2:C:373:ARG:HH21  | 1.62                     | 0.65              |

Continued on next page...

Continued from previous page...

| Atom-1            | Atom-2            | Interatomic distance (Å) | Clash overlap (Å) |
|-------------------|-------------------|--------------------------|-------------------|
| 3:D:213:CYS:HA    | 3:D:217:LEU:HB2   | 1.78                     | 0.65              |
| 5:F:263:PHE:CE2   | 5:F:341:LYS:HD3   | 2.25                     | 0.65              |
| 2:C:301:GLN:HE22  | 2:C:307:PRO:HG2   | 1.62                     | 0.64              |
| 1:A:336:LYS:HG2   | 4:E:24:LEU:HD23   | 1.79                     | 0.64              |
| 3:D:286:LEU:HB2   | 3:D:290:GLU:OE1   | 1.96                     | 0.64              |
| 2:C:431:ASP:O     | 2:C:435:VAL:HG13  | 1.98                     | 0.64              |
| 5:F:101:TYR:CE1   | 5:F:126:ASP:HB3   | 2.33                     | 0.64              |
| 2:C:271:THR:HG23  | 2:C:300:ASN:O     | 1.96                     | 0.64              |
| 3:D:20:PHE:CZ     | 3:D:24:ILE:HD13   | 2.33                     | 0.64              |
| 3:D:402:LYS:HE3   | 3:D:405:LEU:HD13  | 1.77                     | 0.64              |
| 3:D:402:LYS:HE2   | 3:D:405:LEU:HD11  | 1.78                     | 0.64              |
| 6:B:292:THR:HG22  | 6:B:335:VAL:HG21  | 1.80                     | 0.64              |
| 4:E:68:LEU:HD11   | 6:B:158:ARG:NH2   | 2.12                     | 0.64              |
| 3:D:83:PHE:O      | 3:D:86:ILE:HG22   | 1.98                     | 0.63              |
| 3:D:411:GLU:OE1   | 4:E:137:LYS:HE2   | 1.98                     | 0.63              |
| 1:A:2:ARG:HB3     | 1:A:133:GLN:HG2   | 1.80                     | 0.63              |
| 5:F:98:TYR:HA     | 5:F:127:GLU:OE2   | 1.99                     | 0.63              |
| 2:C:274:PRO:CB    | 2:C:286:LEU:HD12  | 2.28                     | 0.63              |
| 6:B:2:ARG:HA      | 6:B:131:CYS:O     | 1.97                     | 0.63              |
| 6:B:88:ARG:NH1    | 6:B:90:ASP:HB2    | 2.14                     | 0.63              |
| 3:D:325:MET:SD    | 3:D:355:VAL:HG21  | 2.39                     | 0.63              |
| 1:A:75:ILE:HD12   | 1:A:94:THR:HG22   | 1.79                     | 0.62              |
| 1:A:63:PRO:HD3    | 1:A:86:LEU:HG     | 1.80                     | 0.62              |
| 1:A:172:TYR:HE1   | 1:A:391:LEU:HD22  | 1.64                     | 0.62              |
| 2:C:211:ASP:HB3   | 2:C:215:ARG:NH1   | 2.15                     | 0.62              |
| 1:A:70:LEU:HD13   | 1:A:110:ILE:CG2   | 2.30                     | 0.62              |
| 5:F:237:THR:H     | 5:F:240:LEU:HD12  | 1.65                     | 0.62              |
| 2:C:432:TYR:O     | 2:C:435:VAL:HG22  | 2.00                     | 0.62              |
| 4:E:46:SER:O      | 4:E:50:ILE:HD13   | 2.00                     | 0.62              |
| 11:X:505:VLB:H572 | 11:X:505:VLB:H511 | 1.80                     | 0.61              |
| 3:D:106:GLY:O     | 3:D:111:GLY:HA3   | 2.00                     | 0.61              |
| 1:A:316[B]:CYS:SG | 1:A:318:LEU:HD21  | 2.41                     | 0.61              |
| 3:D:22:GLU:HG2    | 3:D:83:PHE:CD2    | 2.34                     | 0.61              |
| 3:D:141:LEU:HA    | 3:D:147:SER:HB3   | 1.81                     | 0.61              |
| 5:F:57:GLY:HA3    | 6:B:333:LEU:HD13  | 1.83                     | 0.61              |
| 6:B:191:VAL:HG11  | 6:B:425:MET:CE    | 2.31                     | 0.61              |
| 5:F:185:TYR:HE1   | 5:F:228:TYR:HH    | 1.46                     | 0.61              |
| 1:A:155:GLU:HA    | 1:A:197:HIS:CD2   | 2.36                     | 0.61              |
| 3:D:396:THR:O     | 3:D:400:ARG:HB2   | 2.01                     | 0.61              |
| 5:F:3:THR:HB      | 5:F:30:LEU:HD11   | 1.83                     | 0.61              |
| 2:C:176:GLN:NE2   | 2:C:207:GLU:HG3   | 2.14                     | 0.60              |

Continued on next page...

Continued from previous page...

| Atom-1            | Atom-2            | Interatomic distance (Å) | Clash overlap (Å) |
|-------------------|-------------------|--------------------------|-------------------|
| 6:B:73:GLY:O      | 6:B:75:MET:N      | 2.35                     | 0.60              |
| 2:C:255:PHE:CE1   | 2:C:352:LYS:HG2   | 2.37                     | 0.60              |
| 1:A:172:TYR:CE1   | 1:A:391:LEU:HD22  | 2.37                     | 0.60              |
| 1:A:56:THR:HG22   | 1:A:60:LYS:HB3    | 1.84                     | 0.60              |
| 2:C:4[A]:CYS:SG   | 2:C:136:LEU:HG    | 2.42                     | 0.60              |
| 3:D:194:LEU:HD22  | 3:D:198:THR:HG21  | 1.84                     | 0.60              |
| 6:B:2:ARG:HD3     | 6:B:133:GLN:CG    | 2.22                     | 0.60              |
| 11:X:505:VLB:H262 | 11:X:505:VLB:N1   | 2.16                     | 0.60              |
| 2:C:165:SER:HA    | 2:C:199:ASP:OD2   | 2.02                     | 0.59              |
| 2:C:166:LYS:HE2   | 2:C:197:HIS:O     | 2.01                     | 0.59              |
| 2:C:274:PRO:HB3   | 2:C:286:LEU:HD12  | 1.85                     | 0.59              |
| 3:D:103:TRP:HB2   | 3:D:186:ASN:OD1   | 2.01                     | 0.59              |
| 2:C:335:ILE:CG2   | 2:C:341:ILE:HD11  | 2.32                     | 0.59              |
| 4:E:126:LYS:HE2   | 4:E:126:LYS:CA    | 2.29                     | 0.59              |
| 5:F:100:ILE:HG12  | 5:F:128:ARG:HA    | 1.82                     | 0.59              |
| 11:X:505:VLB:C67  | 11:X:505:VLB:H691 | 2.33                     | 0.59              |
| 1:A:163:LYS:O     | 1:A:164:LYS:HD2   | 2.03                     | 0.59              |
| 6:B:171:VAL:HA    | 6:B:204:ILE:O     | 2.03                     | 0.59              |
| 1:A:56:THR:HG21   | 1:A:60:LYS:HB3    | 1.85                     | 0.59              |
| 3:D:12:CYS:O      | 3:D:16:ILE:HG12   | 2.03                     | 0.59              |
| 4:E:45:PRO:HB3    | 4:E:49:GLU:OE1    | 2.03                     | 0.59              |
| 5:F:220:VAL:HG12  | 5:F:263:PHE:CE1   | 2.38                     | 0.58              |
| 1:A:69:ASP:O      | 1:A:94:THR:HA     | 2.04                     | 0.58              |
| 2:C:223:THR:O     | 2:C:227:LEU:HD13  | 2.03                     | 0.58              |
| 6:B:200:GLU:OE2   | 6:B:256:ALA:HB2   | 2.02                     | 0.58              |
| 2:C:311:LYS:HG2   | 2:C:342:GLN:HG2   | 1.84                     | 0.58              |
| 2:C:405:VAL:O     | 2:C:409:VAL:HG23  | 2.03                     | 0.58              |
| 3:D:66:ILE:HD11   | 3:D:125:GLU:HG3   | 1.86                     | 0.58              |
| 5:F:165:GLU:O     | 5:F:168:GLU:HG2   | 2.04                     | 0.58              |
| 2:C:261:PRO:HG3   | 2:C:313:MET:CE    | 2.33                     | 0.58              |
| 4:E:47:LEU:O      | 4:E:51:GLN:HG2    | 2.03                     | 0.58              |
| 5:F:186:LEU:HD21  | 5:F:328:TRP:CD1   | 2.38                     | 0.58              |
| 6:B:69:ASP:O      | 6:B:94:PHE:HA     | 2.04                     | 0.58              |
| 2:C:88:HIS:CD2    | 2:C:90:GLU:HG3    | 2.39                     | 0.58              |
| 3:D:6:HIS:CD2     | 3:D:21:TRP:HE1    | 2.22                     | 0.58              |
| 5:F:326:LYS:HE2   | 5:F:328:TRP:CH2   | 2.39                     | 0.58              |
| 3:D:145:THR:N     | 10:X:508:GDP:O2B  | 2.37                     | 0.57              |
| 3:D:118:VAL:HG11  | 3:D:153:LEU:HD11  | 1.86                     | 0.57              |
| 3:D:183:GLU:HB2   | 3:D:184:PRO:HD3   | 1.85                     | 0.57              |
| 3:D:205:ASP:O     | 3:D:209:LEU:HD22  | 2.04                     | 0.57              |
| 2:C:195:LEU:HD12  | 2:C:266:HIS:CE1   | 2.39                     | 0.57              |

Continued on next page...

Continued from previous page...

| Atom-1             | Atom-2             | Interatomic distance (Å) | Clash overlap (Å) |
|--------------------|--------------------|--------------------------|-------------------|
| 3:D:171:VAL:HA     | 3:D:204:ILE:O      | 2.05                     | 0.57              |
| 1:A:265:ILE:HG23   | 1:A:432:TYR:CZ     | 2.39                     | 0.57              |
| 2:C:119:LEU:HD11   | 2:C:156:ARG:HB3    | 1.87                     | 0.57              |
| 5:F:199:PHE:HB3    | 5:F:223:THR:HG22   | 1.87                     | 0.57              |
| 1:A:36:MET:HB3     | 1:A:61:HIS:CE1     | 2.40                     | 0.56              |
| 2:C:75:ILE:HG22    | 2:C:79:ARG:NH1     | 2.19                     | 0.56              |
| 1:A:2:ARG:O        | 1:A:51[B]:THR:HG23 | 2.05                     | 0.56              |
| 1:A:163:LYS:HD2    | 1:A:163:LYS:N      | 2.20                     | 0.56              |
| 3:D:392:SER:O      | 3:D:396:THR:HG22   | 2.05                     | 0.56              |
| 2:C:248:LEU:HD13   | 11:X:505:VLB:H61   | 1.87                     | 0.56              |
| 3:D:206:ASN:HA     | 3:D:209:LEU:HD23   | 1.87                     | 0.56              |
| 1:A:180:ALA:O      | 1:A:183:GLU:HG3    | 2.06                     | 0.56              |
| 3:D:295:MET:CE     | 3:D:375:ALA:HB1    | 2.36                     | 0.56              |
| 3:D:347:ILE:HG22   | 3:D:350:ASN:HB3    | 1.88                     | 0.56              |
| 1:A:277:SER:HB3    | 1:A:280:LYS:CE     | 2.36                     | 0.56              |
| 3:D:332:MET:O      | 3:D:335:VAL:HG12   | 2.05                     | 0.56              |
| 3:D:97:SER:HB2     | 3:D:110:GLU:HG2    | 1.87                     | 0.56              |
| 3:D:204:ILE:HD12   | 3:D:204:ILE:N      | 2.21                     | 0.56              |
| 5:F:46:ARG:HB3     | 5:F:46:ARG:CZ      | 2.36                     | 0.56              |
| 3:D:188:THR:HG23   | 3:D:425:MET:HE3    | 1.88                     | 0.55              |
| 2:C:311:LYS:HE3    | 2:C:436:GLY:O      | 2.05                     | 0.55              |
| 3:D:291:LEU:HD11   | 3:D:373:MET:HG3    | 1.88                     | 0.55              |
| 2:C:271:THR:CG2    | 2:C:295:CYS:HA     | 2.37                     | 0.55              |
| 2:C:368:LEU:HD12   | 2:C:369:ALA:H      | 1.71                     | 0.55              |
| 1:A:137:VAL:HG21   | 1:A:154:MET:CE     | 2.36                     | 0.55              |
| 3:D:209:LEU:HD12   | 3:D:230:LEU:HB2    | 1.88                     | 0.55              |
| 3:D:402:LYS:HG2    | 3:D:405:LEU:HD22   | 1.87                     | 0.55              |
| 5:F:163:SER:HB3    | 5:F:169:LEU:HD11   | 1.89                     | 0.55              |
| 6:B:158:ARG:NH1    | 6:B:197:ASN:OD1    | 2.39                     | 0.55              |
| 2:C:151[B]:SER:HB3 | 2:C:193:THR:HG21   | 1.88                     | 0.55              |
| 6:B:311:ARG:NH1    | 6:B:341:SER:O      | 2.38                     | 0.55              |
| 3:D:259:MET:CE     | 3:D:314:THR:HB     | 2.36                     | 0.54              |
| 2:C:287:SER:H      | 2:C:290:GLU:HG3    | 1.72                     | 0.54              |
| 2:C:172:TYR:HB3    | 2:C:205:ASP:HA     | 1.90                     | 0.54              |
| 2:C:301:GLN:NE2    | 2:C:307:PRO:HG2    | 2.22                     | 0.54              |
| 2:C:88:HIS:CD2     | 2:C:90:GLU:H       | 2.25                     | 0.54              |
| 3:D:205:ASP:HB3    | 3:D:303:ALA:HA     | 1.90                     | 0.54              |
| 3:D:290:GLU:O      | 3:D:293:GLN:HG2    | 2.06                     | 0.54              |
| 5:F:245:ILE:HG22   | 5:F:245:ILE:O      | 2.07                     | 0.54              |
| 1:A:56:THR:CG2     | 1:A:60:LYS:H       | 2.20                     | 0.54              |
| 1:A:357:TYR:CD2    | 4:E:17:GLY:HA2     | 2.43                     | 0.54              |

Continued on next page...

Continued from previous page...

| Atom-1             | Atom-2             | Interatomic distance (Å) | Clash overlap (Å) |
|--------------------|--------------------|--------------------------|-------------------|
| 6:B:30:ILE:HD12    | 6:B:30:ILE:N       | 2.23                     | 0.54              |
| 2:C:151[A]:SER:HB2 | 2:C:193:THR:HG21   | 1.90                     | 0.54              |
| 2:C:261:PRO:HG3    | 2:C:313:MET:HE2    | 1.90                     | 0.54              |
| 3:D:264:ARG:NE     | 3:D:431:GLU:OE2    | 2.41                     | 0.54              |
| 3:D:286:LEU:H      | 3:D:286:LEU:HD23   | 1.72                     | 0.54              |
| 3:D:8:GLN:NE2      | 3:D:14:ASN:HA      | 2.23                     | 0.54              |
| 3:D:416:MET:O      | 3:D:419:THR:N      | 2.40                     | 0.54              |
| 5:F:162:ILE:C      | 5:F:162:ILE:HD12   | 2.28                     | 0.54              |
| 2:C:414:GLU:O      | 2:C:417[B]:GLU:HG3 | 2.08                     | 0.54              |
| 6:B:21:TRP:CZ2     | 6:B:65:ALA:HB2     | 2.43                     | 0.54              |
| 3:D:20:PHE:HB2     | 3:D:235:MET:HE1    | 1.90                     | 0.53              |
| 1:A:90:GLU:O       | 1:A:121:ARG:HD2    | 2.09                     | 0.53              |
| 1:A:265:ILE:HG23   | 1:A:432:TYR:CE1    | 2.43                     | 0.53              |
| 2:C:344:VAL:HG21   | 2:C:346:TRP:CE2    | 2.44                     | 0.53              |
| 3:D:402:LYS:HE2    | 3:D:405:LEU:CD1    | 2.36                     | 0.53              |
| 3:D:7:ILE:O        | 3:D:137:LEU:HA     | 2.08                     | 0.53              |
| 6:B:21:TRP:CZ3     | 6:B:63:PRO:HB3     | 2.44                     | 0.53              |
| 1:A:339:ARG:HB2    | 1:A:341:ILE:CD1    | 2.39                     | 0.53              |
| 2:C:332:ILE:O      | 2:C:336:LYS:HG3    | 2.08                     | 0.53              |
| 4:E:105:MET:HE2    | 4:E:105:MET:HA     | 1.91                     | 0.53              |
| 1:A:372[B]:GLN:OE1 | 1:A:373:ARG:NH1    | 2.42                     | 0.53              |
| 5:F:171:ASP:HA     | 5:F:174:ASP:HB2    | 1.91                     | 0.53              |
| 2:C:434:GLU:HA     | 2:C:437:VAL:HG23   | 1.91                     | 0.52              |
| 5:F:74:LYS:NZ      | 5:F:331:GLU:OE1    | 2.41                     | 0.52              |
| 6:B:319:PHE:O      | 6:B:355:VAL:HA     | 2.09                     | 0.52              |
| 1:A:191:THR:O      | 1:A:195:LEU:HB2    | 2.09                     | 0.52              |
| 2:C:214:ARG:HG2    | 2:C:219:ILE:O      | 2.08                     | 0.52              |
| 5:F:147:TRP:HB3    | 5:F:182:ILE:HG23   | 1.91                     | 0.52              |
| 5:F:280:GLU:HA     | 5:F:284[A]:LEU:HB2 | 1.91                     | 0.52              |
| 6:B:221:THR:CA     | 11:X:505:VLB:H761  | 2.36                     | 0.52              |
| 2:C:117:LEU:HD11   | 2:C:121:ARG:CZ     | 2.40                     | 0.52              |
| 2:C:335:ILE:HG23   | 2:C:339:ARG:HD2    | 1.90                     | 0.52              |
| 1:A:66[B]:VAL:HG23 | 1:A:125:LEU:HD12   | 1.92                     | 0.52              |
| 2:C:151[B]:SER:HB3 | 2:C:193:THR:CG2    | 2.40                     | 0.52              |
| 1:A:96:LYS:N       | 1:A:96:LYS:HD2     | 2.25                     | 0.52              |
| 2:C:21:TRP:CZ3     | 2:C:63:PRO:HB3     | 2.45                     | 0.52              |
| 1:A:93:ILE:HD11    | 1:A:121:ARG:HG3    | 1.90                     | 0.52              |
| 2:C:151[A]:SER:HB2 | 2:C:193:THR:CG2    | 2.40                     | 0.52              |
| 3:D:312:TYR:CE1    | 3:D:377:PHE:HZ     | 2.28                     | 0.52              |
| 1:A:18:ASN:OD1     | 1:A:78:VAL:HG22    | 2.10                     | 0.52              |
| 1:A:285:GLN:HG3    | 1:A:372[B]:GLN:CD  | 2.30                     | 0.52              |

Continued on next page...

Continued from previous page...

| Atom-1           | Atom-2           | Interatomic distance (Å) | Clash overlap (Å) |
|------------------|------------------|--------------------------|-------------------|
| 3:D:166:MET:HA   | 3:D:166:MET:CE   | 2.40                     | 0.52              |
| 6:B:4:ILE:O      | 6:B:64:ARG:HD2   | 2.09                     | 0.52              |
| 1:A:209:ILE:HG22 | 1:A:227:LEU:HD22 | 1.92                     | 0.51              |
| 3:D:22:GLU:HG2   | 3:D:83:PHE:HD2   | 1.75                     | 0.51              |
| 1:A:319:TYR:HB3  | 1:A:323:VAL:HG21 | 1.90                     | 0.51              |
| 3:D:153:LEU:O    | 3:D:157:ILE:HG13 | 2.10                     | 0.51              |
| 3:D:320:ARG:O    | 3:D:373:MET:HA   | 2.10                     | 0.51              |
| 5:F:87:LEU:O     | 5:F:90:SER:HB2   | 2.10                     | 0.51              |
| 5:F:93:TRP:CZ3   | 5:F:290:ILE:HG23 | 2.46                     | 0.51              |
| 5:F:225:SER:HB2  | 5:F:260:ASN:HD21 | 1.76                     | 0.51              |
| 1:A:2:ARG:HB3    | 1:A:133:GLN:CG   | 2.41                     | 0.51              |
| 3:D:11:GLN:HB3   | 10:X:508:GDP:O2A | 2.10                     | 0.51              |
| 3:D:49:ILE:HG13  | 3:D:53:TYR:HD2   | 1.74                     | 0.51              |
| 5:F:255:ARG:HD3  | 5:F:256:TYR:CZ   | 2.45                     | 0.51              |
| 1:A:434:GLU:O    | 1:A:437:VAL:HG12 | 2.10                     | 0.51              |
| 3:D:176:LYS:HD3  | 3:D:210:TYR:CD2  | 2.46                     | 0.51              |
| 6:B:83:PHE:CD2   | 6:B:86:ILE:HD13  | 2.43                     | 0.51              |
| 2:C:200:CYS:HA   | 2:C:266:HIS:HB2  | 1.93                     | 0.51              |
| 2:C:227:LEU:O    | 2:C:231:ILE:HG13 | 2.10                     | 0.51              |
| 1:A:96:LYS:HD2   | 1:A:96:LYS:H     | 1.75                     | 0.51              |
| 2:C:313:MET:O    | 2:C:314:ALA:HB2  | 2.10                     | 0.51              |
| 3:D:319:PHE:HB2  | 3:D:355:VAL:HG12 | 1.94                     | 0.50              |
| 5:F:233:PHE:HA   | 5:F:239:HIS:NE2  | 2.23                     | 0.50              |
| 5:F:279:LEU:HD12 | 5:F:283:ILE:HB   | 1.93                     | 0.50              |
| 6:B:289:PRO:O    | 6:B:293:GLN:HG2  | 2.11                     | 0.50              |
| 2:C:70:LEU:HD13  | 2:C:110:ILE:CG2  | 2.41                     | 0.50              |
| 2:C:318:LEU:HD12 | 2:C:318:LEU:H    | 1.74                     | 0.50              |
| 5:F:162:ILE:HD13 | 5:F:233:PHE:HB2  | 1.92                     | 0.50              |
| 11:X:505:VLB:C73 | 11:X:505:VLB:O32 | 2.60                     | 0.50              |
| 1:A:317:LEU:CD2  | 1:A:377:MET:HE2  | 2.34                     | 0.50              |
| 1:A:251:ASP:OD1  | 1:A:253:THR:HB   | 2.11                     | 0.50              |
| 6:B:322:ARG:O    | 6:B:373:MET:HE2  | 2.11                     | 0.50              |
| 6:B:48:ARG:NH2   | 6:B:250:ALA:O    | 2.41                     | 0.50              |
| 2:C:296:PHE:HB3  | 2:C:339:ARG:HD3  | 1.93                     | 0.50              |
| 6:B:172:MET:HG3  | 6:B:387:LEU:HD11 | 1.92                     | 0.50              |
| 3:D:59:ASN:O     | 3:D:59:ASN:ND2   | 2.45                     | 0.50              |
| 6:B:83:PHE:HB3   | 6:B:86:ILE:CD1   | 2.42                     | 0.50              |
| 3:D:259:MET:HA   | 3:D:259:MET:CE   | 2.40                     | 0.49              |
| 3:D:301:MET:HA   | 3:D:301:MET:HE2  | 1.92                     | 0.49              |
| 1:A:277:SER:HB3  | 1:A:280:LYS:CD   | 2.41                     | 0.49              |
| 3:D:403:ALA:O    | 3:D:405:LEU:N    | 2.46                     | 0.49              |

Continued on next page...

Continued from previous page...

| Atom-1             | Atom-2            | Interatomic distance (Å) | Clash overlap (Å) |
|--------------------|-------------------|--------------------------|-------------------|
| 5:F:148:ILE:O      | 5:F:182:ILE:HG12  | 2.12                     | 0.49              |
| 6:B:7:ILE:O        | 6:B:137:LEU:HA    | 2.12                     | 0.49              |
| 2:C:320:ARG:CG     | 2:C:358:GLN:O     | 2.59                     | 0.49              |
| 3:D:12:CYS:SG      | 3:D:171:VAL:HG21  | 2.51                     | 0.49              |
| 11:X:505:VLB:H64   | 11:X:505:VLB:H211 | 1.95                     | 0.49              |
| 1:A:123:ARG:HH22   | 1:A:160:ASP:HB3   | 1.76                     | 0.49              |
| 2:C:295:CYS:SG     | 2:C:375:VAL:HG13  | 2.52                     | 0.49              |
| 2:C:306:ASP:OD2    | 2:C:308:ARG:NH2   | 2.45                     | 0.49              |
| 3:D:416:MET:O      | 3:D:417:GLU:C     | 2.49                     | 0.49              |
| 6:B:123:ARG:O      | 6:B:127:GLU:HG2   | 2.13                     | 0.49              |
| 2:C:241:SER:HA     | 2:C:249:ASN:HD21  | 1.77                     | 0.49              |
| 5:F:162:ILE:HD11   | 5:F:233:PHE:C     | 2.33                     | 0.49              |
| 2:C:252:LEU:O      | 2:C:256:GLN:HG3   | 2.12                     | 0.49              |
| 2:C:274:PRO:HB2    | 2:C:286:LEU:HD12  | 1.93                     | 0.49              |
| 3:D:88:ARG:NH2     | 12:S:29:HOH:O     | 2.44                     | 0.49              |
| 5:F:163:SER:HB3    | 5:F:169:LEU:CD1   | 2.43                     | 0.49              |
| 1:A:227:LEU:O      | 1:A:231:ILE:HG13  | 2.12                     | 0.49              |
| 2:C:117:LEU:HD11   | 2:C:121:ARG:NH2   | 2.27                     | 0.49              |
| 4:E:131:GLU:OE1    | 4:E:131:GLU:HA    | 2.13                     | 0.49              |
| 2:C:324:VAL:HG22   | 2:C:327:ASP:OD2   | 2.13                     | 0.49              |
| 1:A:71:GLU:OE2     | 1:A:74:VAL:HG23   | 2.13                     | 0.48              |
| 2:C:40:LYS:O       | 2:C:42:ILE:N      | 2.46                     | 0.48              |
| 2:C:383:ALA:O      | 2:C:386:GLU:HG3   | 2.13                     | 0.48              |
| 3:D:146:GLY:N      | 10:X:508:GDP:O2B  | 2.40                     | 0.48              |
| 6:B:312:TYR:CD1    | 6:B:381:SER:HB2   | 2.48                     | 0.48              |
| 3:D:345:GLU:CG     | 3:D:440:ALA:HB2   | 2.40                     | 0.48              |
| 1:A:154:MET:HG3    | 1:A:194:THR:CG2   | 2.39                     | 0.48              |
| 2:C:241:SER:HB2    | 2:C:250:VAL:O     | 2.13                     | 0.48              |
| 4:E:76:ARG:NH1     | 4:E:79:GLU:OE2    | 2.46                     | 0.48              |
| 6:B:54:ASN:OD1     | 6:B:64:ARG:NH2    | 2.46                     | 0.48              |
| 6:B:204:ILE:HD13   | 6:B:231:VAL:HG13  | 1.95                     | 0.48              |
| 6:B:231:VAL:O      | 6:B:235:MET:HG3   | 2.14                     | 0.48              |
| 5:F:135:TYR:OH     | 5:F:164:SER:O     | 2.25                     | 0.48              |
| 2:C:377:MET:HE3    | 2:C:377:MET:HB3   | 1.83                     | 0.48              |
| 5:F:99:VAL:HG23    | 5:F:126:ASP:HB2   | 1.95                     | 0.48              |
| 5:F:299:GLU:N      | 5:F:300:PRO:HD2   | 2.28                     | 0.48              |
| 1:A:68[A]:VAL:HG22 | 1:A:93:ILE:HB     | 1.93                     | 0.48              |
| 1:A:141:PHE:O      | 1:A:147:SER:HB3   | 2.14                     | 0.48              |
| 6:B:284:ARG:O      | 6:B:284:ARG:HG3   | 2.14                     | 0.48              |
| 1:A:151:SER:HB2    | 1:A:193:THR:CG2   | 2.43                     | 0.48              |
| 3:D:104:ALA:HB2    | 3:D:413:MET:CE    | 2.43                     | 0.48              |

Continued on next page...

Continued from previous page...

| Atom-1             | Atom-2              | Interatomic distance (Å) | Clash overlap (Å) |
|--------------------|---------------------|--------------------------|-------------------|
| 6:B:180:THR:O      | 6:B:183:GLU:HG3     | 2.14                     | 0.48              |
| 2:C:68[B]:VAL:HG21 | 2:C:118:VAL:HG21    | 1.95                     | 0.48              |
| 5:F:179:VAL:HG13   | 5:F:179:VAL:O       | 2.14                     | 0.47              |
| 6:B:74:THR:O       | 6:B:78:VAL:HG23     | 2.13                     | 0.47              |
| 6:B:83:PHE:HB3     | 6:B:86:ILE:HD11     | 1.95                     | 0.47              |
| 1:A:88:HIS:O       | 1:A:91:GLN:HG2      | 2.13                     | 0.47              |
| 2:C:403:ALA:O      | 2:C:404:PHE:HB2     | 2.14                     | 0.47              |
| 3:D:22:GLU:OE2     | 3:D:82:PRO:HG2      | 2.14                     | 0.47              |
| 3:D:385:GLN:O      | 3:D:389:LYS:HG3     | 2.14                     | 0.47              |
| 2:C:288:VAL:O      | 2:C:291:ILE:HG12    | 2.13                     | 0.47              |
| 5:F:161:LEU:HD12   | 5:F:169:LEU:HD21    | 1.97                     | 0.47              |
| 3:D:30:ILE:HD12    | 3:D:30:ILE:N        | 2.29                     | 0.47              |
| 4:E:50:ILE:HD12    | 4:E:50:ILE:N        | 2.29                     | 0.47              |
| 6:B:191:VAL:HG11   | 6:B:425:MET:HE2     | 1.93                     | 0.47              |
| 2:C:6:SER:O        | 2:C:65:ALA:HA       | 2.15                     | 0.47              |
| 2:C:147:SER:HB2    | 2:C:190:THR:HB      | 1.96                     | 0.47              |
| 2:C:283:HIS:O      | 2:C:284:GLU:HB2     | 2.14                     | 0.47              |
| 2:C:284:GLU:OE2    | 2:C:286:LEU:HD21    | 2.14                     | 0.47              |
| 5:F:271:LEU:HD23   | 5:F:275[A]:LEU:HD23 | 1.95                     | 0.47              |
| 6:B:200:GLU:HB3    | 6:B:268:PHE:CE2     | 2.50                     | 0.47              |
| 2:C:328:VAL:O      | 2:C:332:ILE:HG13    | 2.15                     | 0.47              |
| 3:D:308:ARG:HG3    | 3:D:342:TYR:CZ      | 2.50                     | 0.47              |
| 3:D:319:PHE:HB3    | 3:D:323:MET:HE3     | 1.95                     | 0.47              |
| 4:E:53:LYS:HE3     | 4:E:53:LYS:HB2      | 1.72                     | 0.47              |
| 5:F:267:PHE:O      | 5:F:271:LEU:HG      | 2.15                     | 0.47              |
| 3:D:411:GLU:OE1    | 4:E:137:LYS:CE      | 2.63                     | 0.47              |
| 5:F:326:LYS:HE2    | 5:F:328:TRP:CE2     | 2.48                     | 0.47              |
| 1:A:7:ILE:HG21     | 1:A:153:LEU:HD21    | 1.96                     | 0.47              |
| 1:A:79:ARG:HG2     | 1:A:92:LEU:HD13     | 1.95                     | 0.47              |
| 1:A:241:SER:HB2    | 1:A:248:LEU:O       | 2.15                     | 0.47              |
| 2:C:83:TYR:HD2     | 2:C:86:LEU:HD22     | 1.79                     | 0.47              |
| 1:A:3:GLU:HG2      | 1:A:64:ARG:HH21     | 1.79                     | 0.47              |
| 3:D:286:LEU:HD23   | 3:D:286:LEU:N       | 2.30                     | 0.47              |
| 3:D:355:VAL:HG23   | 3:D:355:VAL:O       | 2.14                     | 0.47              |
| 3:D:49:ILE:HG13    | 3:D:53:TYR:CD2      | 2.49                     | 0.46              |
| 6:B:296:PHE:CE1    | 6:B:335:VAL:HG11    | 2.50                     | 0.46              |
| 1:A:204:VAL:HG13   | 1:A:302:MET:HE3     | 1.97                     | 0.46              |
| 3:D:9:ALA:HA       | 3:D:68:VAL:O        | 2.15                     | 0.46              |
| 5:F:98:TYR:O       | 5:F:181:VAL:HG23    | 2.15                     | 0.46              |
| 5:F:148:ILE:HG12   | 5:F:149:ALA:N       | 2.30                     | 0.46              |
| 5:F:196:HIS:O      | 5:F:228:TYR:N       | 2.48                     | 0.46              |

Continued on next page...

Continued from previous page...

| Atom-1           | Atom-2           | Interatomic distance (Å) | Clash overlap (Å) |
|------------------|------------------|--------------------------|-------------------|
| 6:B:70:LEU:HD12  | 6:B:99:ALA:HB2   | 1.97                     | 0.46              |
| 6:B:291:LEU:HD11 | 6:B:373:MET:HB3  | 1.96                     | 0.46              |
| 2:C:27:GLU:CD    | 2:C:320:ARG:HH22 | 2.19                     | 0.46              |
| 3:D:62:VAL:HG11  | 3:D:88:ARG:HG3   | 1.97                     | 0.46              |
| 5:F:221:LEU:HD12 | 5:F:221:LEU:N    | 2.30                     | 0.46              |
| 5:F:283:ILE:HG23 | 5:F:327:VAL:CG2  | 2.45                     | 0.46              |
| 3:D:174:SER:O    | 3:D:177:VAL:HG12 | 2.15                     | 0.46              |
| 3:D:320:ARG:HA   | 3:D:356:CYS:O    | 2.16                     | 0.46              |
| 5:F:283:ILE:HG23 | 5:F:327:VAL:HG21 | 1.97                     | 0.46              |
| 6:B:141:LEU:HD12 | 6:B:172:MET:CE   | 2.45                     | 0.46              |
| 6:B:346:TRP:HE1  | 6:B:438:ALA:HB3  | 1.81                     | 0.46              |
| 6:B:402:LYS:HE2  | 6:B:415:GLU:OE1  | 2.16                     | 0.46              |
| 2:C:313:MET:HE2  | 2:C:346:TRP:HH2  | 1.81                     | 0.46              |
| 3:D:220:THR:HG22 | 3:D:221:THR:HG23 | 1.97                     | 0.46              |
| 3:D:406:HIS:CD2  | 3:D:407:TRP:CD1  | 2.98                     | 0.46              |
| 5:F:132:LEU:HD21 | 5:F:170:LEU:CD1  | 2.34                     | 0.46              |
| 5:F:162:ILE:CD1  | 5:F:233:PHE:HB2  | 2.44                     | 0.46              |
| 1:A:21:TRP:CZ3   | 1:A:63:PRO:HB3   | 2.51                     | 0.46              |
| 6:B:292:THR:HG22 | 6:B:335:VAL:CG2  | 2.44                     | 0.46              |
| 1:A:187:SER:HB3  | 1:A:391:LEU:HD21 | 1.98                     | 0.46              |
| 1:A:258:ASN:OD1  | 1:A:352:LYS:HE2  | 2.16                     | 0.46              |
| 3:D:135:PHE:HB2  | 3:D:166:MET:CE   | 2.46                     | 0.46              |
| 5:F:320:MET:HE1  | 12:S:42:HOH:O    | 2.15                     | 0.46              |
| 6:B:172:MET:HE2  | 6:B:387:LEU:HD21 | 1.98                     | 0.46              |
| 2:C:287:SER:H    | 2:C:290:GLU:CG   | 2.29                     | 0.46              |
| 3:D:20:PHE:CE2   | 3:D:24:ILE:HD13  | 2.51                     | 0.46              |
| 2:C:335:ILE:O    | 2:C:336:LYS:C    | 2.53                     | 0.46              |
| 3:D:406:HIS:NE2  | 3:D:407:TRP:CD1  | 2.83                     | 0.46              |
| 6:B:75:MET:O     | 6:B:76:ASP:C     | 2.54                     | 0.46              |
| 1:A:2:ARG:O      | 1:A:133:GLN:NE2  | 2.42                     | 0.46              |
| 5:F:72:CYS:HA    | 5:F:332:VAL:O    | 2.15                     | 0.46              |
| 6:B:145:THR:N    | 10:X:504:GDP:O2B | 2.49                     | 0.46              |
| 1:A:103:TYR:CE1  | 1:A:148:GLY:HA2  | 2.51                     | 0.45              |
| 2:C:16:ILE:CD1   | 2:C:171:ILE:HD11 | 2.46                     | 0.45              |
| 2:C:136:LEU:HD23 | 2:C:167:LEU:HB2  | 1.98                     | 0.45              |
| 5:F:200:ASP:O    | 5:F:221:LEU:HA   | 2.16                     | 0.45              |
| 6:B:405:LEU:HD12 | 6:B:405:LEU:HA   | 1.80                     | 0.45              |
| 3:D:69:ASP:HA    | 3:D:145:THR:HG21 | 1.98                     | 0.45              |
| 1:A:155:GLU:HA   | 1:A:197:HIS:HD2  | 1.81                     | 0.45              |
| 3:D:141:LEU:HB3  | 3:D:187:ALA:HA   | 1.98                     | 0.45              |
| 5:F:235:ASP:O    | 5:F:236:LYS:HB2  | 2.15                     | 0.45              |

Continued on next page...

Continued from previous page...

| Atom-1           | Atom-2            | Interatomic distance (Å) | Clash overlap (Å) |
|------------------|-------------------|--------------------------|-------------------|
| 1:A:341:ILE:N    | 1:A:341:ILE:HD12  | 2.30                     | 0.45              |
| 2:C:88:HIS:HD2   | 2:C:90:GLU:HB2    | 1.82                     | 0.45              |
| 3:D:103:TRP:CE3  | 3:D:189:LEU:HD13  | 2.51                     | 0.45              |
| 4:E:44:ASP:HA    | 4:E:45:PRO:HD3    | 1.76                     | 0.45              |
| 1:A:275:VAL:HG13 | 1:A:368:LEU:CD2   | 2.46                     | 0.45              |
| 3:D:295:MET:HE2  | 3:D:377:PHE:HB2   | 1.98                     | 0.45              |
| 2:C:328:VAL:CG1  | 2:C:353:VAL:HG11  | 2.40                     | 0.45              |
| 5:F:286:GLN:O    | 5:F:290:ILE:HG13  | 2.16                     | 0.45              |
| 6:B:21:TRP:CE3   | 6:B:63:PRO:HB3    | 2.52                     | 0.45              |
| 1:A:211:ASP:OD2  | 1:A:304:LYS:NZ    | 2.41                     | 0.45              |
| 4:E:126:LYS:CA   | 4:E:126:LYS:CE    | 2.95                     | 0.45              |
| 6:B:67:LEU:N     | 6:B:67:LEU:HD12   | 2.32                     | 0.45              |
| 5:F:199:PHE:CD2  | 5:F:221:LEU:HD23  | 2.52                     | 0.45              |
| 1:A:2:ARG:HB3    | 1:A:131:GLY:O     | 2.17                     | 0.45              |
| 1:A:357:TYR:OH   | 4:E:18:GLN:HG3    | 2.16                     | 0.45              |
| 2:C:287:SER:N    | 2:C:290:GLU:HG3   | 2.32                     | 0.45              |
| 6:B:209:LEU:HB3  | 6:B:227:LEU:HG    | 1.98                     | 0.45              |
| 2:C:287:SER:H    | 2:C:290:GLU:CD    | 2.21                     | 0.44              |
| 4:E:82:VAL:HG11  | 6:B:108:TYR:CG    | 2.52                     | 0.44              |
| 1:A:343:PHE:CD1  | 1:A:349:THR:HG23  | 2.53                     | 0.44              |
| 5:F:191:LEU:HD13 | 5:F:196:HIS:CE1   | 2.53                     | 0.44              |
| 5:F:320:MET:CE   | 12:S:42:HOH:O     | 2.65                     | 0.44              |
| 6:B:9:ALA:HA     | 6:B:68:VAL:O      | 2.17                     | 0.44              |
| 3:D:385:GLN:HB2  | 3:D:429:VAL:HG13  | 1.98                     | 0.44              |
| 6:B:1:MET:HE2    | 6:B:1:MET:HA      | 1.99                     | 0.44              |
| 6:B:222:PRO:HD2  | 11:X:505:VLB:H762 | 1.99                     | 0.44              |
| 1:A:258:ASN:HB2  | 1:A:259:LEU:HD22  | 1.99                     | 0.44              |
| 6:B:165:ILE:HA   | 6:B:199:ASP:OD2   | 2.17                     | 0.44              |
| 3:D:36:TYR:CD1   | 3:D:46:LEU:HD11   | 2.53                     | 0.44              |
| 2:C:7:ILE:HG21   | 2:C:153:LEU:HD21  | 1.99                     | 0.44              |
| 3:D:137:LEU:HG   | 3:D:139:HIS:ND1   | 2.32                     | 0.44              |
| 5:F:320:MET:HE2  | 5:F:330:ILE:HG13  | 1.99                     | 0.44              |
| 1:A:322:ASP:HB3  | 1:A:373:ARG:HH21  | 1.83                     | 0.44              |
| 3:D:402:LYS:HG2  | 3:D:402:LYS:O     | 2.18                     | 0.44              |
| 4:E:7:GLU:O      | 4:E:22:VAL:HA     | 2.17                     | 0.44              |
| 5:F:135:TYR:HE1  | 5:F:145:ASN:HB3   | 1.83                     | 0.44              |
| 1:A:52:PHE:O     | 1:A:64:ARG:HG3    | 2.17                     | 0.43              |
| 1:A:413:MET:CE   | 1:A:418:PHE:CE1   | 3.01                     | 0.43              |
| 2:C:219:ILE:HD13 | 2:C:226:ASN:ND2   | 2.33                     | 0.43              |
| 3:D:135:PHE:HB2  | 3:D:166:MET:HE3   | 2.00                     | 0.43              |
| 3:D:404:PHE:C    | 3:D:406:HIS:H     | 2.22                     | 0.43              |

Continued on next page...

Continued from previous page...

| Atom-1              | Atom-2            | Interatomic distance (Å) | Clash overlap (Å) |
|---------------------|-------------------|--------------------------|-------------------|
| 5:F:284[A]:LEU:HD12 | 5:F:284[A]:LEU:HA | 1.76                     | 0.43              |
| 6:B:106:GLY:O       | 6:B:111:GLY:HA3   | 2.18                     | 0.43              |
| 6:B:319:PHE:HB2     | 6:B:355:VAL:HG22  | 2.01                     | 0.43              |
| 2:C:18:ASN:OD1      | 2:C:78:VAL:HG22   | 2.18                     | 0.43              |
| 2:C:330:ALA:O       | 2:C:333:ALA:HB3   | 2.18                     | 0.43              |
| 3:D:23:VAL:O        | 3:D:27:GLU:HG3    | 2.18                     | 0.43              |
| 1:A:101:ASN:ND2     | 1:A:180:ALA:HB2   | 2.34                     | 0.43              |
| 1:A:134:GLY:HA3     | 1:A:165:SER:O     | 2.18                     | 0.43              |
| 2:C:407:TRP:CH2     | 3:D:256:ALA:HB1   | 2.53                     | 0.43              |
| 3:D:69:ASP:O        | 3:D:94:PHE:HA     | 2.18                     | 0.43              |
| 3:D:194:LEU:CD2     | 3:D:198:THR:HG21  | 2.48                     | 0.43              |
| 11:X:505:VLB:H762   | 11:X:505:VLB:H512 | 1.99                     | 0.43              |
| 3:D:73:GLY:HA2      | 3:D:76:ASP:HB2    | 1.99                     | 0.43              |
| 3:D:180:THR:O       | 3:D:182:VAL:N     | 2.46                     | 0.43              |
| 2:C:93:ILE:HG22     | 2:C:114:ILE:HD11  | 2.01                     | 0.43              |
| 2:C:335:ILE:HG22    | 2:C:341:ILE:HD11  | 2.00                     | 0.43              |
| 3:D:104:ALA:HB2     | 3:D:413:MET:HE1   | 2.01                     | 0.43              |
| 1:A:56:THR:HG22     | 1:A:60:LYS:N      | 2.34                     | 0.43              |
| 2:C:250:VAL:HG11    | 2:C:352:LYS:HE2   | 2.00                     | 0.43              |
| 5:F:21:LEU:HD22     | 5:F:27:TRP:NE1    | 2.34                     | 0.43              |
| 5:F:45:ASN:C        | 5:F:46:ARG:HG2    | 2.39                     | 0.43              |
| 3:D:21:TRP:CZ3      | 3:D:63:PRO:HB3    | 2.53                     | 0.43              |
| 5:F:231:ALA:O       | 5:F:232:ASN:HB3   | 2.17                     | 0.43              |
| 5:F:286:GLN:OE1     | 5:F:327:VAL:HG23  | 2.18                     | 0.43              |
| 3:D:21:TRP:CZ2      | 3:D:65:ALA:HB2    | 2.53                     | 0.43              |
| 3:D:93:VAL:HG12     | 3:D:114:LEU:HD11  | 2.01                     | 0.43              |
| 6:B:203:CYS:SG      | 6:B:267:PHE:HB3   | 2.59                     | 0.43              |
| 1:A:172:TYR:HB3     | 1:A:205:ASP:HA    | 2.01                     | 0.42              |
| 5:F:257:GLU:HB3     | 5:F:260:ASN:CA    | 2.43                     | 0.42              |
| 6:B:146:GLY:O       | 6:B:150:GLY:HA3   | 2.17                     | 0.42              |
| 6:B:285:ALA:HB2     | 6:B:372:LYS:CE    | 2.42                     | 0.42              |
| 3:D:204:ILE:HG21    | 3:D:231:VAL:HG22  | 2.01                     | 0.42              |
| 3:D:268:PHE:O       | 3:D:270:PRO:HD3   | 2.19                     | 0.42              |
| 1:A:192:HIS:CG      | 1:A:421:ALA:HA    | 2.54                     | 0.42              |
| 1:A:388:TRP:CE3     | 1:A:425:MET:HE1   | 2.54                     | 0.42              |
| 2:C:398:MET:HE3     | 3:D:347:ILE:HG23  | 2.00                     | 0.42              |
| 2:C:399:TYR:O       | 2:C:402:ARG:HD3   | 2.19                     | 0.42              |
| 2:C:422:ARG:HD2     | 2:C:422:ARG:HA    | 1.74                     | 0.42              |
| 3:D:172:MET:HA      | 3:D:173:PRO:HD3   | 1.91                     | 0.42              |
| 1:A:285:GLN:CG      | 1:A:372[B]:GLN:CD | 2.88                     | 0.42              |
| 1:A:297:GLU:OE2     | 1:A:339:ARG:NH2   | 2.48                     | 0.42              |

Continued on next page...

*Continued from previous page...*

| Atom-1           | Atom-2              | Interatomic distance (Å) | Clash overlap (Å) |
|------------------|---------------------|--------------------------|-------------------|
| 2:C:1:MET:O      | 2:C:2:ARG:HB2       | 2.20                     | 0.42              |
| 2:C:415:GLU:O    | 2:C:418:PHE:HB2     | 2.19                     | 0.42              |
| 3:D:120:ASP:O    | 3:D:124:LYS:HG3     | 2.19                     | 0.42              |
| 3:D:298:SER:HB2  | 3:D:306:ASP:OD1     | 2.18                     | 0.42              |
| 3:D:298:SER:CB   | 3:D:307:PRO:HD2     | 2.42                     | 0.42              |
| 3:D:414:ASP:OD1  | 3:D:414:ASP:N       | 2.43                     | 0.42              |
| 5:F:248:GLU:O    | 5:F:248:GLU:HG2     | 2.19                     | 0.42              |
| 6:B:103:TRP:HB2  | 6:B:186:ASN:OD1     | 2.18                     | 0.42              |
| 2:C:333:ALA:O    | 2:C:334:THR:C       | 2.57                     | 0.42              |
| 6:B:30:ILE:HD12  | 6:B:30:ILE:H        | 1.84                     | 0.42              |
| 1:A:2:ARG:CB     | 1:A:133:GLN:HG2     | 2.47                     | 0.42              |
| 1:A:70:LEU:HB2   | 1:A:98:ASP:HA       | 2.01                     | 0.42              |
| 1:A:210:TYR:CZ   | 1:A:222:PRO:HD2     | 2.54                     | 0.42              |
| 3:D:303:ALA:O    | 3:D:305:CYS:N       | 2.51                     | 0.42              |
| 4:E:137:LYS:NZ   | 4:E:140:LYS:NZ      | 2.67                     | 0.42              |
| 1:A:75:ILE:O     | 1:A:79:ARG:HG3      | 2.20                     | 0.42              |
| 1:A:344:VAL:HG23 | 1:A:347:CYS:HB2     | 2.02                     | 0.42              |
| 4:E:60:ARG:O     | 4:E:64:GLN:HG2      | 2.20                     | 0.42              |
| 5:F:1:MET:CE     | 5:F:28:LYS:HB2      | 2.50                     | 0.42              |
| 5:F:271:LEU:C    | 5:F:273:ASP:H       | 2.22                     | 0.42              |
| 6:B:141:LEU:HD12 | 6:B:172:MET:SD      | 2.59                     | 0.42              |
| 6:B:158:ARG:NH1  | 6:B:197:ASN:HA      | 2.34                     | 0.42              |
| 6:B:387:LEU:C    | 6:B:387:LEU:HD23    | 2.40                     | 0.42              |
| 1:A:406:HIS:CD2  | 6:B:263:PRO:HD3     | 2.55                     | 0.42              |
| 5:F:188:LYS:O    | 5:F:323:GLU:HG3     | 2.20                     | 0.42              |
| 5:F:298:ILE:C    | 5:F:300:PRO:HD2     | 2.40                     | 0.42              |
| 1:A:238:ILE:HG12 | 1:A:378:LEU:HD21    | 2.02                     | 0.42              |
| 3:D:31:ASP:HB2   | 3:D:32:PRO:HD2      | 2.02                     | 0.42              |
| 3:D:205:ASP:O    | 3:D:209:LEU:CD2     | 2.68                     | 0.42              |
| 5:F:6:VAL:HG22   | 5:F:41:LEU:HD12     | 2.02                     | 0.42              |
| 5:F:279:LEU:HG   | 5:F:284[A]:LEU:HD22 | 2.00                     | 0.42              |
| 5:F:279:LEU:HG   | 5:F:284[B]:LEU:HG   | 2.01                     | 0.42              |
| 6:B:46:LEU:HD23  | 6:B:46:LEU:HA       | 1.90                     | 0.42              |
| 6:B:234:THR:O    | 6:B:238:VAL:HG13    | 2.20                     | 0.42              |
| 2:C:104:ALA:HB2  | 2:C:413:MET:HG3     | 2.02                     | 0.41              |
| 1:A:254:GLU:HG2  | 1:A:258:ASN:ND2     | 2.34                     | 0.41              |
| 2:C:98:ASP:HB2   | 7:X:506:GTP:O3G     | 2.20                     | 0.41              |
| 2:C:210:TYR:CZ   | 2:C:222:PRO:HD2     | 2.56                     | 0.41              |
| 5:F:160:ILE:HG13 | 5:F:240:LEU:HD21    | 2.01                     | 0.41              |
| 1:A:357:TYR:OH   | 4:E:18:GLN:NE2      | 2.44                     | 0.41              |
| 2:C:296:PHE:CB   | 2:C:339:ARG:HD3     | 2.49                     | 0.41              |

*Continued on next page...*

Continued from previous page...

| Atom-1             | Atom-2           | Interatomic distance (Å) | Clash overlap (Å) |
|--------------------|------------------|--------------------------|-------------------|
| 3:D:42:LEU:HB3     | 3:D:358:ILE:HD11 | 2.02                     | 0.41              |
| 5:F:217:ARG:HG3    | 5:F:218:GLU:HG2  | 2.01                     | 0.41              |
| 2:C:430:LYS:O      | 2:C:434:GLU:HG3  | 2.19                     | 0.41              |
| 3:D:404:PHE:C      | 3:D:406:HIS:N    | 2.74                     | 0.41              |
| 5:F:55:GLU:HB2     | 5:F:60:GLN:HE21  | 1.85                     | 0.41              |
| 1:A:100:ALA:HB2    | 6:B:253:ARG:HD2  | 2.03                     | 0.41              |
| 1:A:103:TYR:CD1    | 1:A:148:GLY:HA2  | 2.55                     | 0.41              |
| 1:A:213:CYS:O      | 1:A:217:LEU:HB2  | 2.20                     | 0.41              |
| 2:C:90:GLU:HB3     | 2:C:121:ARG:HD2  | 2.03                     | 0.41              |
| 5:F:98:TYR:HB3     | 5:F:127:GLU:HG3  | 2.02                     | 0.41              |
| 1:A:372[B]:GLN:HG3 | 1:A:373:ARG:CZ   | 2.50                     | 0.41              |
| 1:A:255:PHE:O      | 1:A:259:LEU:HD23 | 2.20                     | 0.41              |
| 5:F:96:GLU:O       | 5:F:183:GLN:HA   | 2.21                     | 0.41              |
| 2:C:328:VAL:HG11   | 11:X:505:VLB:H63 | 2.02                     | 0.41              |
| 4:E:46:SER:O       | 4:E:50:ILE:CD1   | 2.68                     | 0.41              |
| 1:A:56:THR:HG22    | 1:A:60:LYS:H     | 1.86                     | 0.41              |
| 1:A:385:ALA:HB2    | 1:A:432:TYR:CG   | 2.57                     | 0.41              |
| 4:E:24:LEU:HD12    | 4:E:24:LEU:N     | 2.36                     | 0.41              |
| 2:C:285:GLN:HE21   | 2:C:373:ARG:HH12 | 1.68                     | 0.40              |
| 2:C:308:ARG:C      | 2:C:310:GLY:H    | 2.25                     | 0.40              |
| 3:D:36:TYR:CE1     | 3:D:46:LEU:CD1   | 3.04                     | 0.40              |
| 3:D:202:TYR:O      | 3:D:204:ILE:HD12 | 2.21                     | 0.40              |
| 3:D:324:SER:O      | 3:D:328:VAL:HG23 | 2.21                     | 0.40              |
| 5:F:216:TYR:OH     | 5:F:342:LEU:HD22 | 2.21                     | 0.40              |
| 6:B:191:VAL:CG1    | 6:B:425:MET:CE   | 2.97                     | 0.40              |
| 1:A:335:ILE:HD12   | 1:A:336:LYS:N    | 2.37                     | 0.40              |
| 5:F:39:LEU:HD21    | 5:F:41:LEU:HD21  | 2.03                     | 0.40              |
| 5:F:135:TYR:CE2    | 5:F:166:ALA:HB2  | 2.56                     | 0.40              |
| 6:B:255:LEU:HD12   | 6:B:259:MET:HG2  | 2.03                     | 0.40              |
| 3:D:1:MET:HG3      | 3:D:3:GLU:OE2    | 2.21                     | 0.40              |
| 4:E:8:VAL:O        | 4:E:9:ILE:HD13   | 2.22                     | 0.40              |
| 6:B:28:HIS:HB2     | 6:B:30:ILE:CD1   | 2.52                     | 0.40              |
| 6:B:287:THR:O      | 6:B:288:VAL:C    | 2.57                     | 0.40              |

All (1) symmetry-related close contacts are listed below. The label for Atom-2 includes the symmetry operator and encoded unit-cell translations to be applied.

| Atom-1          | Atom-2               | Interatomic distance (Å) | Clash overlap (Å) |
|-----------------|----------------------|--------------------------|-------------------|
| 2:C:322:ASP:OD2 | 4:E:98:LYS:NZ[4_455] | 1.92                     | 0.28              |

## 5.3 Torsion angles [i](#)

### 5.3.1 Protein backbone [i](#)

In the following table, the Percentiles column shows the percent Ramachandran outliers of the chain as a percentile score with respect to all X-ray entries followed by that with respect to entries of similar resolution.

The Analysed column shows the number of residues for which the backbone conformation was analysed, and the total number of residues.

| Mol | Chain | Analysed         | Favoured   | Allowed  | Outliers | Percentiles |     |
|-----|-------|------------------|------------|----------|----------|-------------|-----|
| 1   | A     | 446/439 (102%)   | 426 (96%)  | 18 (4%)  | 2 (0%)   | 34          | 69  |
| 2   | C     | 445/440 (101%)   | 415 (93%)  | 27 (6%)  | 3 (1%)   | 22          | 61  |
| 3   | D     | 424/424 (100%)   | 402 (95%)  | 20 (5%)  | 2 (0%)   | 29          | 67  |
| 4   | E     | 116/120 (97%)    | 113 (97%)  | 3 (3%)   | 0        | 100         | 100 |
| 5   | F     | 323/331 (98%)    | 295 (91%)  | 26 (8%)  | 2 (1%)   | 25          | 64  |
| 6   | B     | 428/428 (100%)   | 415 (97%)  | 13 (3%)  | 0        | 100         | 100 |
| All | All   | 2182/2182 (100%) | 2066 (95%) | 107 (5%) | 9 (0%)   | 34          | 69  |

All (9) Ramachandran outliers are listed below:

| Mol | Chain | Res | Type |
|-----|-------|-----|------|
| 2   | C     | 41  | THR  |
| 2   | C     | 284 | GLU  |
| 3   | D     | 404 | PHE  |
| 5   | F     | 230 | SER  |
| 1   | A     | 284 | GLU  |
| 2   | C     | 314 | ALA  |
| 1   | A     | 282 | TYR  |
| 3   | D     | 72  | PRO  |
| 5   | F     | 232 | ASN  |

### 5.3.2 Protein sidechains [i](#)

In the following table, the Percentiles column shows the percent sidechain outliers of the chain as a percentile score with respect to all X-ray entries followed by that with respect to entries of similar resolution.

The Analysed column shows the number of residues for which the sidechain conformation was analysed, and the total number of residues.

| Mol | Chain | Analysed         | Rotameric  | Outliers | Percentiles |    |
|-----|-------|------------------|------------|----------|-------------|----|
| 1   | A     | 378/370 (102%)   | 375 (99%)  | 3 (1%)   | 81          | 93 |
| 2   | C     | 378/371 (102%)   | 364 (96%)  | 14 (4%)  | 34          | 68 |
| 3   | D     | 369/366 (101%)   | 366 (99%)  | 3 (1%)   | 81          | 93 |
| 4   | E     | 108/108 (100%)   | 106 (98%)  | 2 (2%)   | 57          | 81 |
| 5   | F     | 303/299 (101%)   | 292 (96%)  | 11 (4%)  | 35          | 69 |
| 6   | B     | 369/370 (100%)   | 364 (99%)  | 5 (1%)   | 67          | 86 |
| All | All   | 1905/1884 (101%) | 1867 (98%) | 38 (2%)  | 57          | 80 |

All (38) residues with a non-rotameric sidechain are listed below:

| Mol | Chain | Res    | Type |
|-----|-------|--------|------|
| 1   | A     | 71     | GLU  |
| 1   | A     | 124    | LYS  |
| 1   | A     | 285    | GLN  |
| 2   | C     | 71     | GLU  |
| 2   | C     | 242    | LEU  |
| 2   | C     | 280    | LYS  |
| 2   | C     | 301    | GLN  |
| 2   | C     | 302    | MET  |
| 2   | C     | 307    | PRO  |
| 2   | C     | 317    | LEU  |
| 2   | C     | 325    | PRO  |
| 2   | C     | 349    | THR  |
| 2   | C     | 363[A] | VAL  |
| 2   | C     | 363[B] | VAL  |
| 2   | C     | 377    | MET  |
| 2   | C     | 391    | LEU  |
| 2   | C     | 439    | SER  |
| 3   | D     | 75     | MET  |
| 3   | D     | 229    | HIS  |
| 3   | D     | 405    | LEU  |
| 4   | E     | 61     | ARG  |
| 4   | E     | 106    | GLU  |
| 5   | F     | 160    | ILE  |
| 5   | F     | 161    | LEU  |
| 5   | F     | 222    | ARG  |
| 5   | F     | 230    | SER  |
| 5   | F     | 233    | PHE  |
| 5   | F     | 234    | GLN  |
| 5   | F     | 238    | CYS  |
| 5   | F     | 256    | TYR  |

Continued on next page...

Continued from previous page...

| Mol | Chain | Res    | Type |
|-----|-------|--------|------|
| 5   | F     | 257    | GLU  |
| 5   | F     | 284[A] | LEU  |
| 5   | F     | 284[B] | LEU  |
| 6   | B     | 2      | ARG  |
| 6   | B     | 71     | GLU  |
| 6   | B     | 77     | SER  |
| 6   | B     | 139    | HIS  |
| 6   | B     | 284    | ARG  |

Sometimes sidechains can be flipped to improve hydrogen bonding and reduce clashes. All (10) such sidechains are listed below:

| Mol | Chain | Res | Type |
|-----|-------|-----|------|
| 2   | C     | 88  | HIS  |
| 2   | C     | 256 | GLN  |
| 2   | C     | 329 | ASN  |
| 2   | C     | 342 | GLN  |
| 3   | D     | 349 | ASN  |
| 5   | F     | 229 | ASN  |
| 5   | F     | 232 | ASN  |
| 5   | F     | 234 | GLN  |
| 5   | F     | 260 | ASN  |
| 6   | B     | 8   | GLN  |

### 5.3.3 RNA [i](#)

There are no RNA molecules in this entry.

### 5.4 Non-standard residues in protein, DNA, RNA chains [i](#)

There are no non-standard protein/DNA/RNA residues in this entry.

### 5.5 Carbohydrates [i](#)

There are no monosaccharides in this entry.

### 5.6 Ligand geometry [i](#)

Of 9 ligands modelled in this entry, 4 are monoatomic - leaving 5 for Mogul analysis.

In the following table, the Counts columns list the number of bonds (or angles) for which Mogul statistics could be retrieved, the number of bonds (or angles) that are observed in the model and the number of bonds (or angles) that are defined in the Chemical Component Dictionary. The Link column lists molecule types, if any, to which the group is linked. The Z score for a bond length (or angle) is the number of standard deviations the observed value is removed from the expected value. A bond length (or angle) with  $|Z| > 2$  is considered an outlier worth inspection. RMSZ is the root-mean-square of all Z scores of the bond lengths (or angles).

| Mol | Type | Chain | Res | Link | Bond lengths |      |          | Bond angles |      |          |
|-----|------|-------|-----|------|--------------|------|----------|-------------|------|----------|
|     |      |       |     |      | Counts       | RMSZ | # Z  > 2 | Counts      | RMSZ | # Z  > 2 |
| 10  | GDP  | X     | 508 | -    | 24,30,30     | 0.90 | 1 (4%)   | 30,47,47    | 1.16 | 4 (13%)  |
| 7   | GTP  | X     | 506 | 8    | 26,34,34     | 1.01 | 3 (11%)  | 32,54,54    | 0.73 | 1 (3%)   |
| 11  | VLB  | X     | 505 | -    | 63,67,67     | 4.03 | 24 (38%) | 79,108,108  | 2.76 | 36 (45%) |
| 10  | GDP  | X     | 504 | -    | 24,30,30     | 0.99 | 1 (4%)   | 30,47,47    | 0.99 | 2 (6%)   |
| 7   | GTP  | X     | 501 | 8    | 26,34,34     | 0.99 | 3 (11%)  | 32,54,54    | 0.71 | 0        |

In the following table, the Chirals column lists the number of chiral outliers, the number of chiral centers analysed, the number of these observed in the model and the number defined in the Chemical Component Dictionary. Similar counts are reported in the Torsion and Rings columns. '-' means no outliers of that kind were identified.

| Mol | Type | Chain | Res | Link | Chirals | Torsions      | Rings   |
|-----|------|-------|-----|------|---------|---------------|---------|
| 10  | GDP  | X     | 508 | -    | -       | 3/12/32/32    | 0/3/3/3 |
| 7   | GTP  | X     | 506 | 8    | -       | 7/18/38/38    | 0/3/3/3 |
| 11  | VLB  | X     | 505 | -    | -       | 12/38/131/131 | 0/7/9/9 |
| 10  | GDP  | X     | 504 | -    | -       | 2/12/32/32    | 0/3/3/3 |
| 7   | GTP  | X     | 501 | 8    | -       | 5/18/38/38    | 0/3/3/3 |

All (32) bond length outliers are listed below:

| Mol | Chain | Res | Type | Atoms   | Z     | Observed(Å) | Ideal(Å) |
|-----|-------|-----|------|---------|-------|-------------|----------|
| 11  | X     | 505 | VLB  | C68-C73 | 25.35 | 1.74        | 1.53     |
| 11  | X     | 505 | VLB  | C58-C59 | -8.42 | 1.37        | 1.52     |
| 11  | X     | 505 | VLB  | C57-N56 | 6.44  | 1.62        | 1.47     |
| 11  | X     | 505 | VLB  | O75-C76 | -5.51 | 1.32        | 1.45     |
| 11  | X     | 505 | VLB  | O32-C33 | -5.13 | 1.27        | 1.42     |
| 11  | X     | 505 | VLB  | C68-C15 | -3.94 | 1.40        | 1.54     |
| 11  | X     | 505 | VLB  | O25-C26 | -3.77 | 1.36        | 1.45     |
| 11  | X     | 505 | VLB  | C5-C6   | -3.73 | 1.44        | 1.51     |
| 11  | X     | 505 | VLB  | C68-C67 | -3.66 | 1.50        | 1.53     |
| 11  | X     | 505 | VLB  | C69-N56 | 3.17  | 1.52        | 1.46     |
| 11  | X     | 505 | VLB  | C20-C5  | -3.17 | 1.50        | 1.55     |

Continued on next page...

Continued from previous page...

| Mol | Chain | Res | Type | Atoms   | Z     | Observed(Å) | Ideal(Å) |
|-----|-------|-----|------|---------|-------|-------------|----------|
| 11  | X     | 505 | VLB  | C70-C54 | 3.05  | 1.58        | 1.53     |
| 11  | X     | 505 | VLB  | O28-C4  | -2.94 | 1.38        | 1.44     |
| 11  | X     | 505 | VLB  | C69-C52 | 2.93  | 1.56        | 1.52     |
| 11  | X     | 505 | VLB  | C57-C58 | -2.90 | 1.44        | 1.52     |
| 11  | X     | 505 | VLB  | C21-C20 | 2.75  | 1.63        | 1.51     |
| 7   | X     | 506 | GTP  | C5-C6   | -2.69 | 1.41        | 1.47     |
| 7   | X     | 501 | GTP  | C5-C6   | -2.67 | 1.42        | 1.47     |
| 10  | X     | 504 | GDP  | C6-N1   | -2.65 | 1.33        | 1.37     |
| 11  | X     | 505 | VLB  | O74-C73 | 2.63  | 1.26        | 1.20     |
| 11  | X     | 505 | VLB  | C19-N9  | 2.58  | 1.51        | 1.47     |
| 11  | X     | 505 | VLB  | O75-C73 | 2.43  | 1.37        | 1.33     |
| 11  | X     | 505 | VLB  | C14-C13 | -2.32 | 1.36        | 1.39     |
| 11  | X     | 505 | VLB  | O27-C3  | -2.31 | 1.38        | 1.42     |
| 10  | X     | 508 | GDP  | C6-N1   | -2.27 | 1.34        | 1.37     |
| 11  | X     | 505 | VLB  | C59-C67 | -2.17 | 1.36        | 1.39     |
| 7   | X     | 501 | GTP  | C8-N7   | -2.13 | 1.31        | 1.35     |
| 7   | X     | 506 | GTP  | C8-N7   | -2.13 | 1.31        | 1.35     |
| 11  | X     | 505 | VLB  | C60-C65 | -2.06 | 1.37        | 1.42     |
| 7   | X     | 506 | GTP  | C5-C4   | -2.04 | 1.37        | 1.43     |
| 11  | X     | 505 | VLB  | C51-C68 | 2.01  | 1.58        | 1.56     |
| 7   | X     | 501 | GTP  | C5-C4   | -2.00 | 1.38        | 1.43     |

All (43) bond angle outliers are listed below:

| Mol | Chain | Res | Type | Atoms       | Z     | Observed(°) | Ideal(°) |
|-----|-------|-----|------|-------------|-------|-------------|----------|
| 11  | X     | 505 | VLB  | O32-C16-C15 | 7.16  | 123.91      | 116.58   |
| 11  | X     | 505 | VLB  | O25-C23-C3  | 7.07  | 124.10      | 112.22   |
| 11  | X     | 505 | VLB  | O72-C54-C70 | -5.59 | 99.11       | 108.75   |
| 11  | X     | 505 | VLB  | C3-C2-N1    | -5.58 | 105.13      | 112.81   |
| 11  | X     | 505 | VLB  | O75-C73-C68 | 5.47  | 119.54      | 111.32   |
| 11  | X     | 505 | VLB  | C33-O32-C16 | -5.25 | 109.60      | 117.53   |
| 11  | X     | 505 | VLB  | C22-N1-C2   | -4.86 | 107.35      | 119.21   |
| 11  | X     | 505 | VLB  | C22-N1-C18  | -4.86 | 105.32      | 120.84   |
| 11  | X     | 505 | VLB  | O32-C16-C17 | -4.76 | 115.93      | 124.12   |
| 11  | X     | 505 | VLB  | C58-C57-N56 | 4.56  | 123.62      | 113.44   |
| 11  | X     | 505 | VLB  | C57-C58-C59 | 4.42  | 122.65      | 114.30   |
| 11  | X     | 505 | VLB  | O75-C73-O74 | -4.34 | 116.33      | 123.93   |
| 11  | X     | 505 | VLB  | O24-C23-C3  | -3.88 | 117.91      | 123.94   |
| 11  | X     | 505 | VLB  | C19-C5-C6   | 3.84  | 112.21      | 108.28   |
| 11  | X     | 505 | VLB  | C13-C18-N1  | 3.83  | 115.33      | 110.98   |
| 11  | X     | 505 | VLB  | O28-C29-C30 | 3.53  | 117.58      | 111.09   |
| 11  | X     | 505 | VLB  | C17-C18-N1  | -3.53 | 122.69      | 127.61   |

Continued on next page...

Continued from previous page...

| Mol | Chain | Res | Type | Atoms       | Z     | Observed(°) | Ideal(°) |
|-----|-------|-----|------|-------------|-------|-------------|----------|
| 11  | X     | 505 | VLB  | O25-C23-O24 | -3.39 | 117.99      | 123.93   |
| 11  | X     | 505 | VLB  | C18-N1-C2   | -3.33 | 104.57      | 109.03   |
| 11  | X     | 505 | VLB  | C63-C64-C65 | -3.30 | 115.34      | 120.08   |
| 11  | X     | 505 | VLB  | C52-C69-N56 | 3.28  | 116.42      | 111.28   |
| 11  | X     | 505 | VLB  | C62-C61-C60 | -3.15 | 116.52      | 120.89   |
| 11  | X     | 505 | VLB  | C14-C15-C16 | 2.89  | 120.91      | 116.78   |
| 11  | X     | 505 | VLB  | C8-N9-C19   | -2.87 | 104.99      | 112.50   |
| 11  | X     | 505 | VLB  | C4-C3-C2    | -2.62 | 103.84      | 109.23   |
| 11  | X     | 505 | VLB  | C76-O75-C73 | -2.54 | 111.65      | 115.94   |
| 11  | X     | 505 | VLB  | C53-C54-C55 | 2.48  | 112.33      | 109.29   |
| 11  | X     | 505 | VLB  | C69-N56-C55 | -2.47 | 108.06      | 111.01   |
| 10  | X     | 504 | GDP  | C8-N7-C5    | 2.44  | 107.64      | 102.99   |
| 10  | X     | 508 | GDP  | C3'-C2'-C1' | 2.38  | 104.57      | 100.98   |
| 11  | X     | 505 | VLB  | C4-O28-C29  | -2.38 | 113.98      | 117.65   |
| 11  | X     | 505 | VLB  | C7-C8-N9    | -2.33 | 105.47      | 111.03   |
| 11  | X     | 505 | VLB  | C17-C16-C15 | -2.25 | 120.13      | 122.20   |
| 10  | X     | 508 | GDP  | C5-C6-N1    | 2.25  | 117.92      | 113.95   |
| 10  | X     | 508 | GDP  | O3B-PB-O3A  | 2.21  | 112.05      | 104.64   |
| 10  | X     | 508 | GDP  | C8-N7-C5    | 2.19  | 107.16      | 102.99   |
| 11  | X     | 505 | VLB  | C61-C60-C65 | 2.17  | 121.05      | 118.17   |
| 11  | X     | 505 | VLB  | C54-C53-C52 | 2.16  | 116.37      | 110.02   |
| 11  | X     | 505 | VLB  | O28-C29-O31 | -2.10 | 118.80      | 122.96   |
| 11  | X     | 505 | VLB  | C53-C52-C69 | 2.08  | 111.15      | 108.72   |
| 10  | X     | 504 | GDP  | PA-O3A-PB   | -2.05 | 125.80      | 132.83   |
| 7   | X     | 506 | GTP  | O6-C6-C5    | 2.03  | 128.34      | 124.37   |
| 11  | X     | 505 | VLB  | C4-C3-C23   | 2.01  | 115.98      | 110.85   |

There are no chirality outliers.

All (29) torsion outliers are listed below:

| Mol | Chain | Res | Type | Atoms           |
|-----|-------|-----|------|-----------------|
| 7   | X     | 501 | GTP  | PB-O3B-PG-O2G   |
| 7   | X     | 501 | GTP  | C5'-O5'-PA-O1A  |
| 7   | X     | 506 | GTP  | C5'-O5'-PA-O1A  |
| 10  | X     | 504 | GDP  | C5'-O5'-PA-O3A  |
| 10  | X     | 504 | GDP  | C5'-O5'-PA-O2A  |
| 10  | X     | 508 | GDP  | C5'-O5'-PA-O1A  |
| 10  | X     | 508 | GDP  | C5'-O5'-PA-O2A  |
| 11  | X     | 505 | VLB  | C68-C73-O75-C76 |
| 11  | X     | 505 | VLB  | C3-C23-O25-C26  |
| 11  | X     | 505 | VLB  | O24-C23-O25-C26 |
| 11  | X     | 505 | VLB  | O74-C73-O75-C76 |

Continued on next page...

Continued from previous page...

| Mol | Chain | Res | Type | Atoms           |
|-----|-------|-----|------|-----------------|
| 11  | X     | 505 | VLB  | C30-C29-O28-C4  |
| 11  | X     | 505 | VLB  | C17-C16-O32-C33 |
| 11  | X     | 505 | VLB  | O31-C29-O28-C4  |
| 11  | X     | 505 | VLB  | C15-C16-O32-C33 |
| 7   | X     | 506 | GTP  | PB-O3A-PA-O1A   |
| 10  | X     | 508 | GDP  | C5'-O5'-PA-O3A  |
| 7   | X     | 501 | GTP  | C5'-O5'-PA-O2A  |
| 7   | X     | 506 | GTP  | C5'-O5'-PA-O2A  |
| 7   | X     | 506 | GTP  | C4'-C5'-O5'-PA  |
| 11  | X     | 505 | VLB  | C58-C57-N56-C55 |
| 11  | X     | 505 | VLB  | C15-C68-C73-O75 |
| 11  | X     | 505 | VLB  | C15-C68-C73-O74 |
| 7   | X     | 501 | GTP  | PB-O3B-PG-O3G   |
| 7   | X     | 501 | GTP  | C5'-O5'-PA-O3A  |
| 7   | X     | 506 | GTP  | C5'-O5'-PA-O3A  |
| 7   | X     | 506 | GTP  | C3'-C4'-C5'-O5' |
| 7   | X     | 506 | GTP  | PB-O3A-PA-O2A   |
| 11  | X     | 505 | VLB  | C21-C20-C5-C4   |

There are no ring outliers.

4 monomers are involved in 20 short contacts:

| Mol | Chain | Res | Type | Clashes | Symm-Clashes |
|-----|-------|-----|------|---------|--------------|
| 10  | X     | 508 | GDP  | 3       | 0            |
| 7   | X     | 506 | GTP  | 1       | 0            |
| 11  | X     | 505 | VLB  | 15      | 0            |
| 10  | X     | 504 | GDP  | 1       | 0            |

The following is a two-dimensional graphical depiction of Mogul quality analysis of bond lengths, bond angles, torsion angles, and ring geometry for all instances of the Ligand of Interest. In addition, ligands with molecular weight > 250 and outliers as shown on the validation Tables will also be included. For torsion angles, if less than 5% of the Mogul distribution of torsion angles is within 10 degrees of the torsion angle in question, then that torsion angle is considered an outlier. Any bond that is central to one or more torsion angles identified as an outlier by Mogul will be highlighted in the graph. For rings, the root-mean-square deviation (RMSD) between the ring in question and similar rings identified by Mogul is calculated over all ring torsion angles. If the average RMSD is greater than 60 degrees and the minimal RMSD between the ring in question and any Mogul-identified rings is also greater than 60 degrees, then that ring is considered an outlier. The outliers are highlighted in purple. The color gray indicates Mogul did not find sufficient equivalents in the CSD to analyse the geometry.

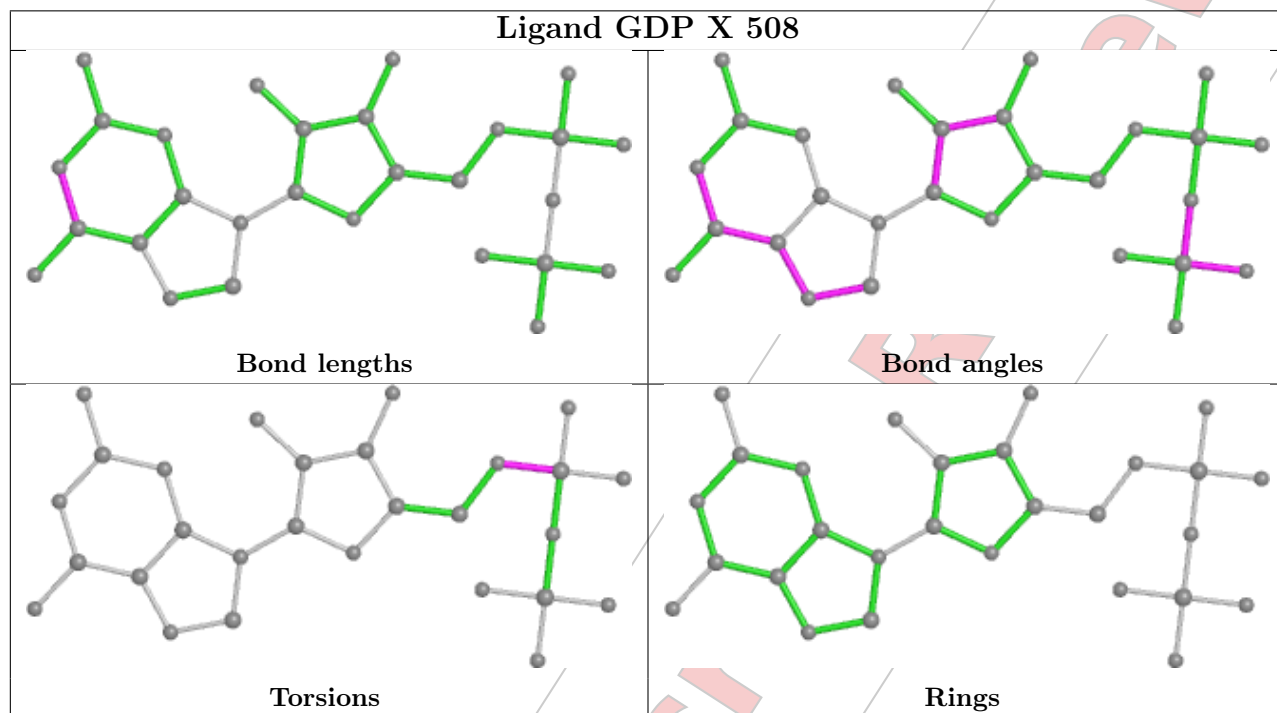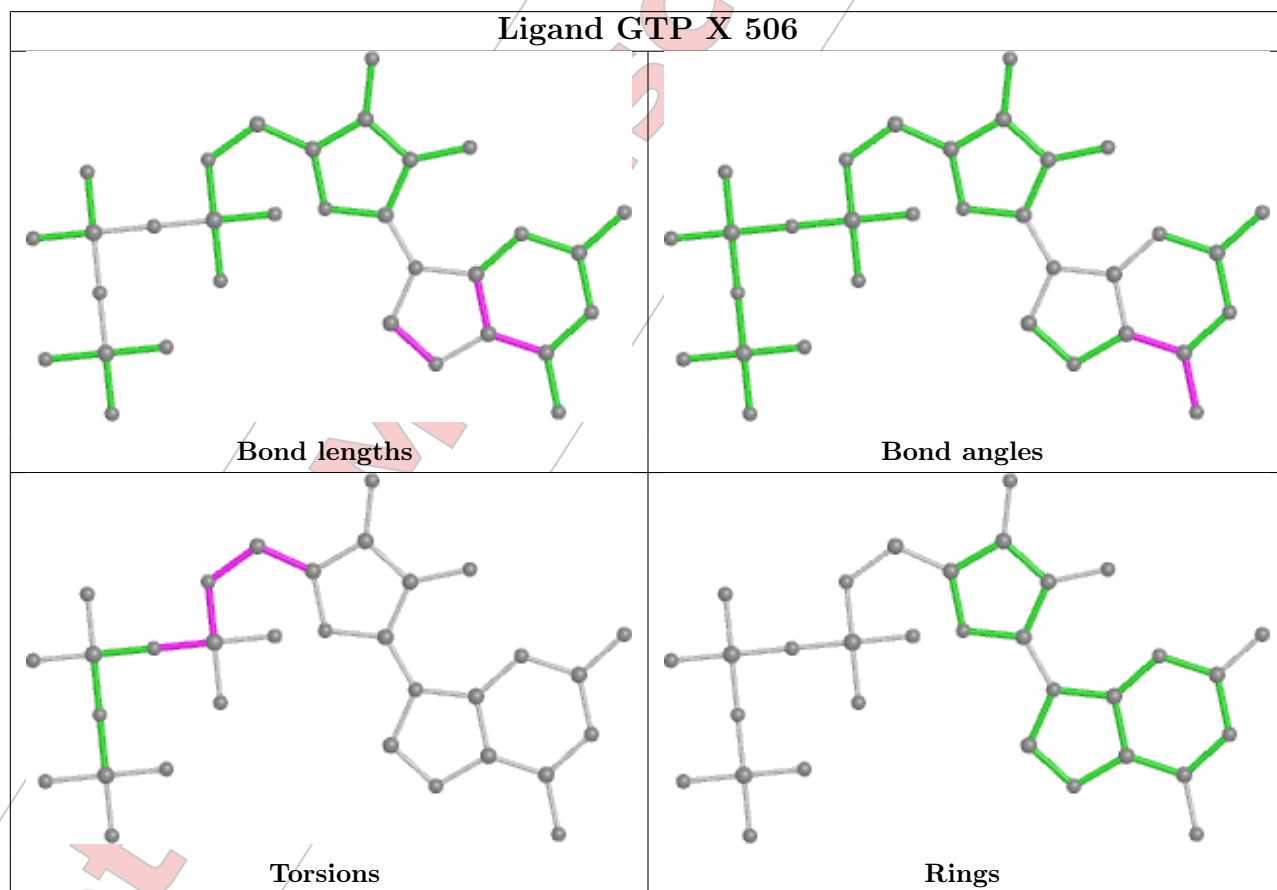

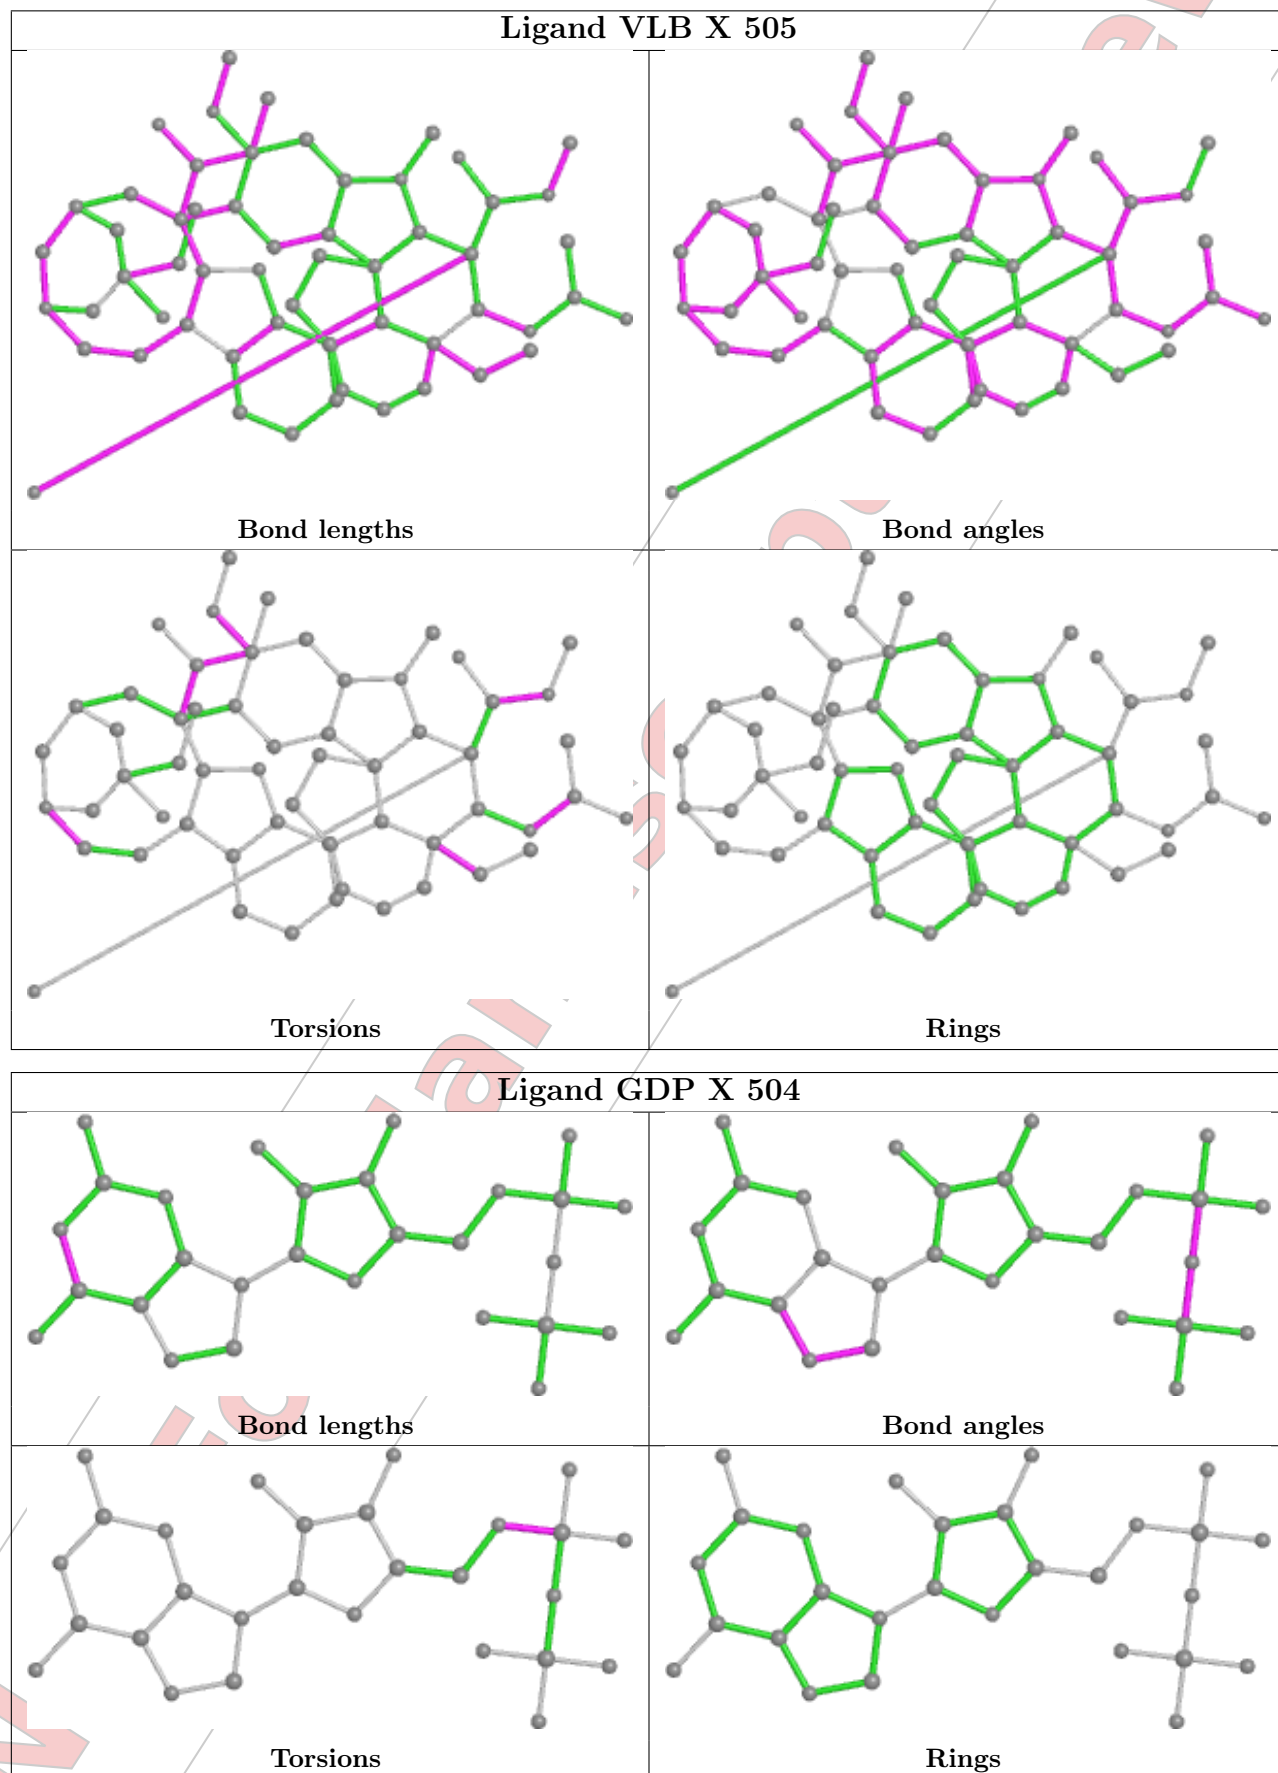

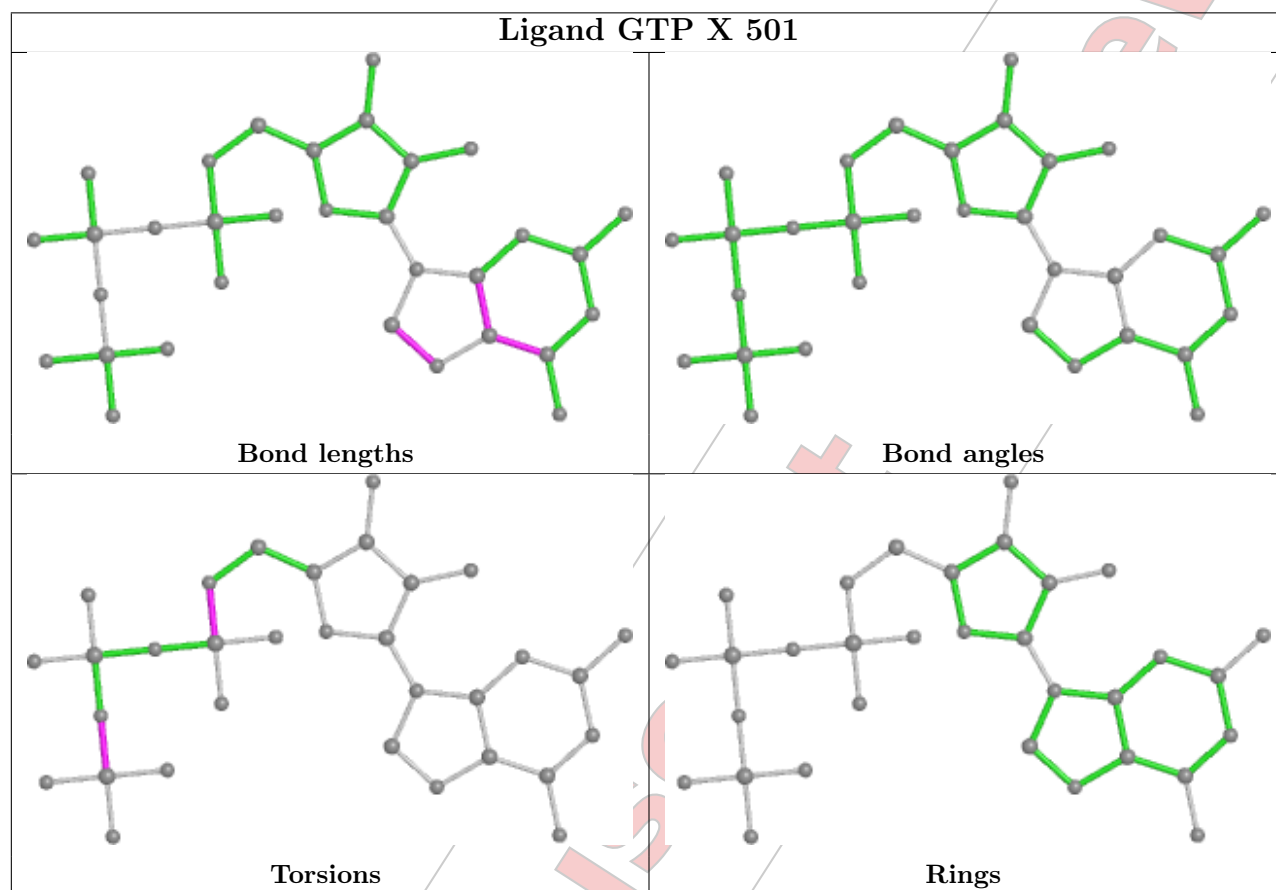

## 5.7 Other polymers [i](#)

There are no such residues in this entry.

## 5.8 Polymer linkage issues [i](#)

The following chains have linkage breaks:

| Mol | Chain | Number of breaks |
|-----|-------|------------------|
| 5   | F     | 5                |
| 4   | E     | 1                |
| 3   | D     | 1                |

All chain breaks are listed below:

| Model | Chain | Residue-1 | Atom-1 | Residue-2 | Atom-2 | Distance (Å) |
|-------|-------|-----------|--------|-----------|--------|--------------|
| 1     | E     | 28:SER    | C      | 44:ASP    | N      | 32.56        |
| 1     | F     | 362:ALA   | C      | 372:THR   | N      | 20.09        |
| 1     | F     | 103:THR   | C      | 125:THR   | N      | 13.23        |
| 1     | D     | 276:THR   | C      | 284:ARG   | N      | 10.40        |

*Continued on next page...*

*Continued from previous page...*

| Model | Chain | Residue-1 | Atom-1 | Residue-2 | Atom-2 | Distance (Å) |
|-------|-------|-----------|--------|-----------|--------|--------------|
| 1     | F     | 250:SER   | C      | 255:ARG   | N      | 9.11         |
| 1     | F     | 149:ALA   | C      | 159:GLY   | N      | 8.13         |
| 1     | F     | 137:ARG   | C      | 144:GLY   | N      | 7.47         |

Not For Manuscript Review

## 6 Fit of model and data [i](#)

### 6.1 Protein, DNA and RNA chains [i](#)

In the following table, the column labelled '#RSRZ > 2' contains the number (and percentage) of RSRZ outliers, followed by percent RSRZ outliers for the chain as percentile scores relative to all X-ray entries and entries of similar resolution. The OWAB column contains the minimum, median, 95<sup>th</sup> percentile and maximum values of the occupancy-weighted average B-factor per residue. The column labelled 'Q < 0.9' lists the number of (and percentage) of residues with an average occupancy less than 0.9.

| Mol | Chain | Analysed         | <RSRZ> | #RSRZ > 2     | OWAB(Å <sup>2</sup> ) | Q < 0.9 |
|-----|-------|------------------|--------|---------------|-----------------------|---------|
| 1   | A     | 439/439 (100%)   | -0.38  | 4 (0%) 84 75  | 36, 65, 112, 259      | 0       |
| 2   | C     | 440/440 (100%)   | -0.49  | 2 (0%) 91 86  | 24, 50, 88, 226       | 0       |
| 3   | D     | 424/424 (100%)   | -0.14  | 14 (3%) 46 30 | 41, 82, 130, 180      | 1 (0%)  |
| 4   | E     | 120/120 (100%)   | 0.02   | 4 (3%) 46 30  | 47, 82, 130, 153      | 0       |
| 5   | F     | 331/331 (100%)   | 0.26   | 31 (9%) 8 4   | 51, 97, 172, 212      | 0       |
| 6   | B     | 428/428 (100%)   | -0.46  | 2 (0%) 91 86  | 24, 54, 97, 150       | 4 (0%)  |
| All | All   | 2182/2182 (100%) | -0.25  | 57 (2%) 56 40 | 24, 68, 134, 259      | 5 (0%)  |

All (57) RSRZ outliers are listed below:

| Mol | Chain | Res | Type | RSRZ |
|-----|-------|-----|------|------|
| 5   | F     | 175 | GLU  | 8.8  |
| 1   | A     | 439 | SER  | 7.3  |
| 5   | F     | 238 | CYS  | 6.5  |
| 5   | F     | 257 | GLU  | 5.6  |
| 5   | F     | 232 | ASN  | 5.3  |
| 5   | F     | 372 | THR  | 5.0  |
| 5   | F     | 102 | PRO  | 4.6  |
| 5   | F     | 231 | ALA  | 4.4  |
| 3   | D     | 56  | ALA  | 4.0  |
| 5   | F     | 167 | SER  | 4.0  |
| 5   | F     | 248 | GLU  | 4.0  |
| 4   | E     | 138 | GLU  | 3.9  |
| 5   | F     | 176 | GLN  | 3.9  |
| 3   | D     | 415 | GLU  | 3.7  |
| 3   | D     | 179 | ASP  | 3.6  |
| 4   | E     | 103 | GLN  | 3.4  |
| 5   | F     | 174 | ASP  | 3.3  |
| 5   | F     | 168 | GLU  | 3.2  |
| 5   | F     | 125 | THR  | 3.1  |

Continued on next page...

Continued from previous page...

| Mol | Chain | Res | Type | RSRZ |
|-----|-------|-----|------|------|
| 3   | D     | 441 | ASP  | 3.1  |
| 3   | D     | 285 | ALA  | 3.0  |
| 5   | F     | 171 | ASP  | 3.0  |
| 5   | F     | 133 | ALA  | 3.0  |
| 5   | F     | 234 | GLN  | 2.9  |
| 3   | D     | 55  | GLU  | 2.9  |
| 5   | F     | 83  | THR  | 2.9  |
| 6   | B     | 80  | SER  | 2.9  |
| 3   | D     | 11  | GLN  | 2.8  |
| 5   | F     | 323 | GLU  | 2.8  |
| 5   | F     | 136 | ASN  | 2.8  |
| 3   | D     | 218 | LYS  | 2.8  |
| 5   | F     | 89  | GLU  | 2.7  |
| 5   | F     | 145 | ASN  | 2.7  |
| 5   | F     | 340 | GLN  | 2.7  |
| 5   | F     | 173 | ILE  | 2.7  |
| 5   | F     | 250 | SER  | 2.7  |
| 1   | A     | 438 | ASP  | 2.6  |
| 3   | D     | 82  | PRO  | 2.6  |
| 6   | B     | 57  | THR  | 2.5  |
| 3   | D     | 284 | ARG  | 2.5  |
| 3   | D     | 416 | MET  | 2.4  |
| 5   | F     | 235 | ASP  | 2.3  |
| 5   | F     | 244 | CYS  | 2.3  |
| 5   | F     | 356 | SER  | 2.2  |
| 2   | C     | 337 | THR  | 2.2  |
| 5   | F     | 159 | GLY  | 2.2  |
| 2   | C     | 283 | HIS  | 2.2  |
| 1   | A     | 280 | LYS  | 2.2  |
| 5   | F     | 333 | ASN  | 2.2  |
| 4   | E     | 140 | LYS  | 2.2  |
| 5   | F     | 225 | SER  | 2.2  |
| 5   | F     | 239 | HIS  | 2.1  |
| 3   | D     | 116 | ASP  | 2.1  |
| 3   | D     | 38  | GLY  | 2.1  |
| 1   | A     | 281 | ALA  | 2.1  |
| 3   | D     | 85  | GLN  | 2.0  |
| 4   | E     | 128 | LYS  | 2.0  |

## 6.2 Non-standard residues in protein, DNA, RNA chains [i](#)

There are no non-standard protein/DNA/RNA residues in this entry.

### 6.3 Carbohydrates [i](#)

There are no monosaccharides in this entry.

### 6.4 Ligands [i](#)

In the following table, the Atoms column lists the number of modelled atoms in the group and the number defined in the chemical component dictionary. The B-factors column lists the minimum, median, 95<sup>th</sup> percentile and maximum values of B factors of atoms in the group. The column labelled 'Q<0.9' lists the number of atoms with occupancy less than 0.9.

| Mol | Type | Chain | Res | Atoms | RSCC | RSR  | B-factors(Å <sup>2</sup> ) | Q<0.9 |
|-----|------|-------|-----|-------|------|------|----------------------------|-------|
| 10  | GDP  | X     | 508 | 28/?  | 0.89 | 0.16 | 74,78,89,101               | 0     |
| 8   | MG   | X     | 507 | 1/?   | 0.91 | 0.40 | 41,41,41,41                | 0     |
| 11  | VLB  | X     | 505 | 59/?  | 0.91 | 0.15 | 38,47,55,59                | 0     |
| 8   | MG   | X     | 502 | 1/?   | 0.92 | 0.29 | 45,45,45,45                | 0     |
| 7   | GTP  | X     | 501 | 32/?  | 0.94 | 0.17 | 49,51,55,55                | 0     |
| 9   | CA   | X     | 509 | 1/?   | 0.95 | 0.17 | 30,30,30,30                | 0     |
| 10  | GDP  | X     | 504 | 28/?  | 0.95 | 0.13 | 36,41,43,44                | 0     |
| 7   | GTP  | X     | 506 | 32/?  | 0.95 | 0.14 | 41,45,48,48                | 0     |
| 9   | CA   | X     | 503 | 1/?   | 0.95 | 0.08 | 91,91,91,91                | 0     |

The following is a graphical depiction of the model fit to experimental electron density of all instances of the Ligand of Interest. In addition, ligands with molecular weight > 250 and outliers as shown on the geometry validation Tables will also be included. Each fit is shown from different orientation to approximate a three-dimensional view.

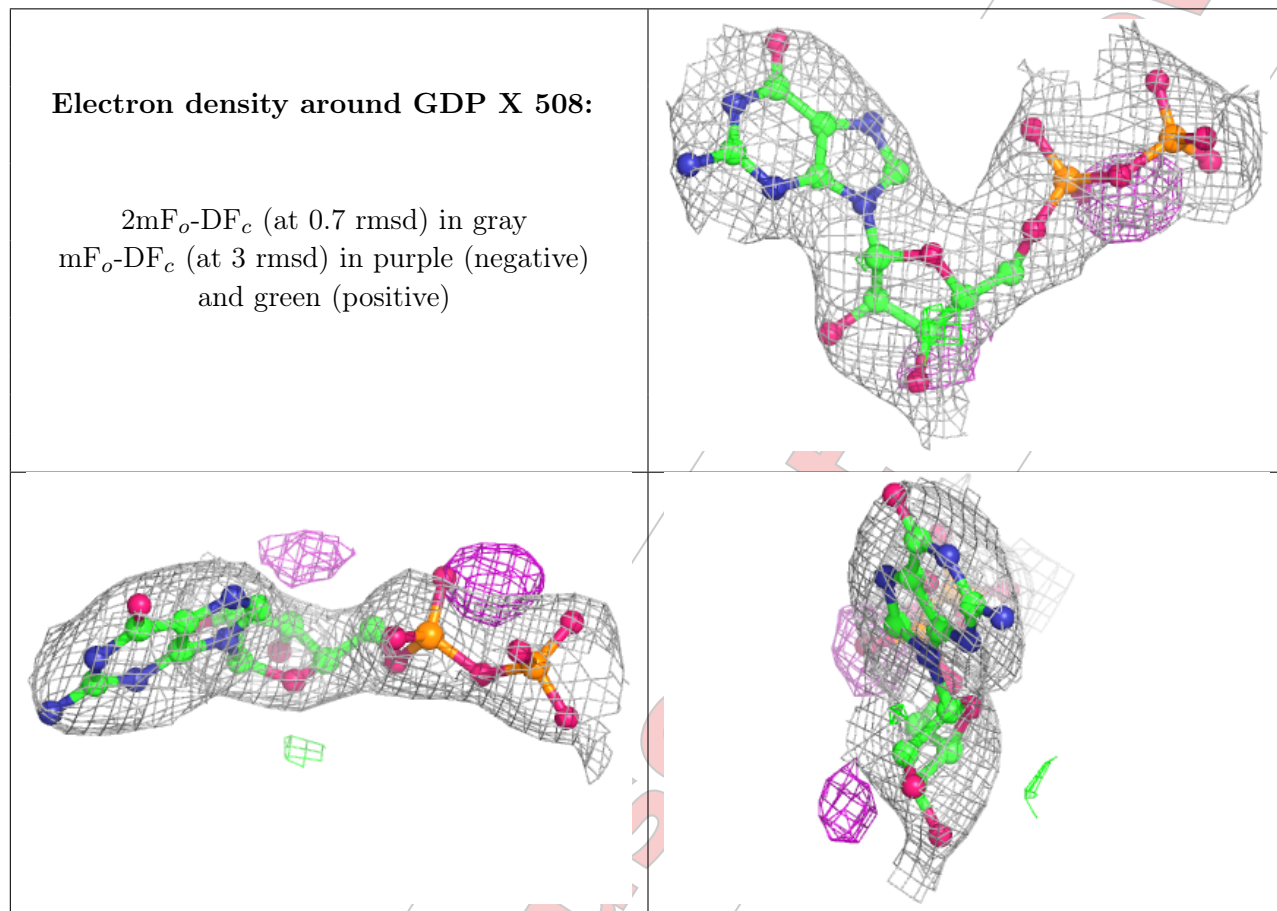

Not For Manuscript

**Electron density around VLB X 505:**

$2mF_o-DF_c$  (at 0.7 rmsd) in gray  
 $mF_o-DF_c$  (at 3 rmsd) in purple (negative)  
and green (positive)

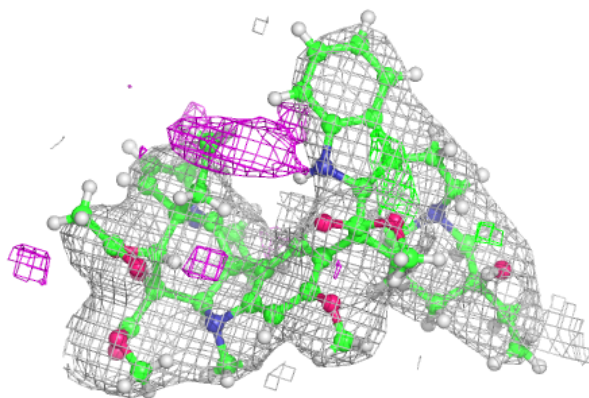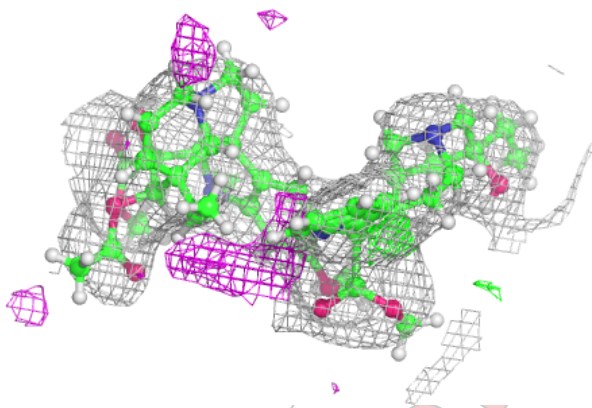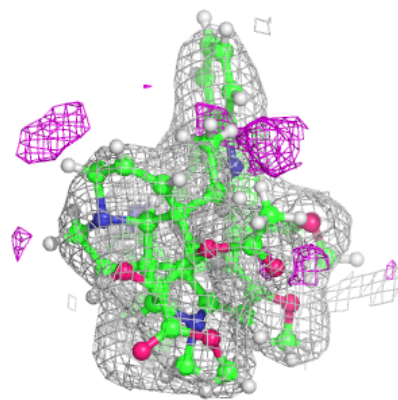

Not For Manuscript Review

**Electron density around GTP X 501:**

$2mF_o-DF_c$  (at 0.7 rmsd) in gray  
 $mF_o-DF_c$  (at 3 rmsd) in purple (negative)  
and green (positive)

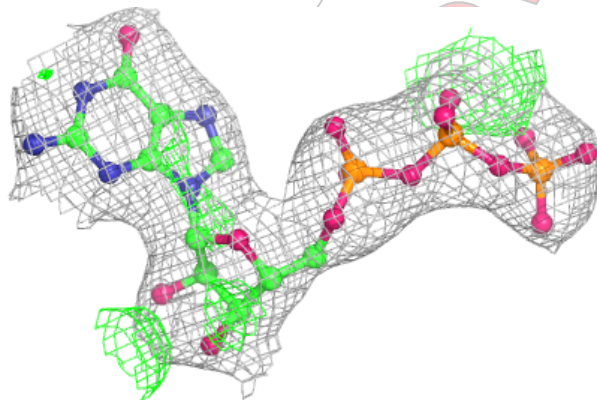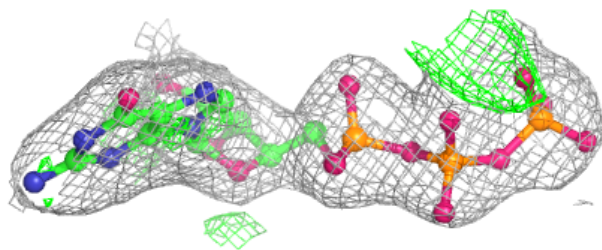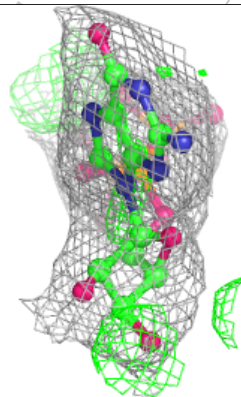

**Electron density around GDP X 504:**

$2mF_o-DF_c$  (at 0.7 rmsd) in gray  
 $mF_o-DF_c$  (at 3 rmsd) in purple (negative)  
and green (positive)

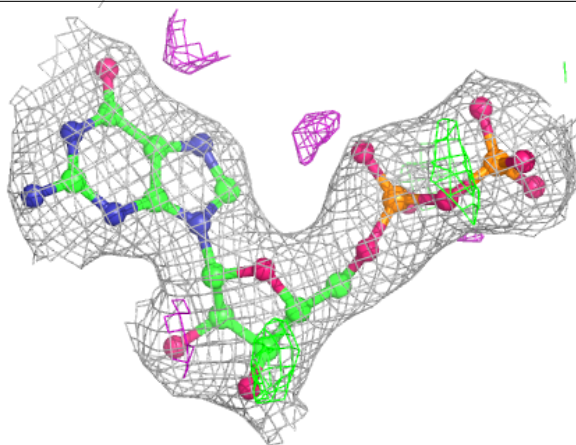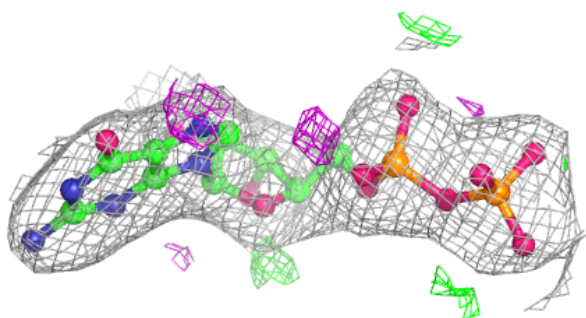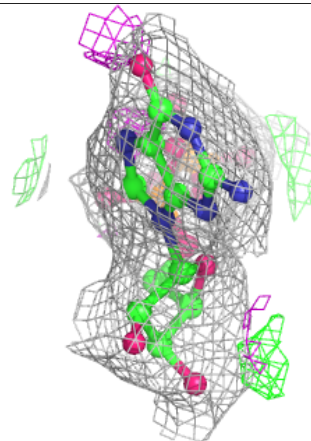

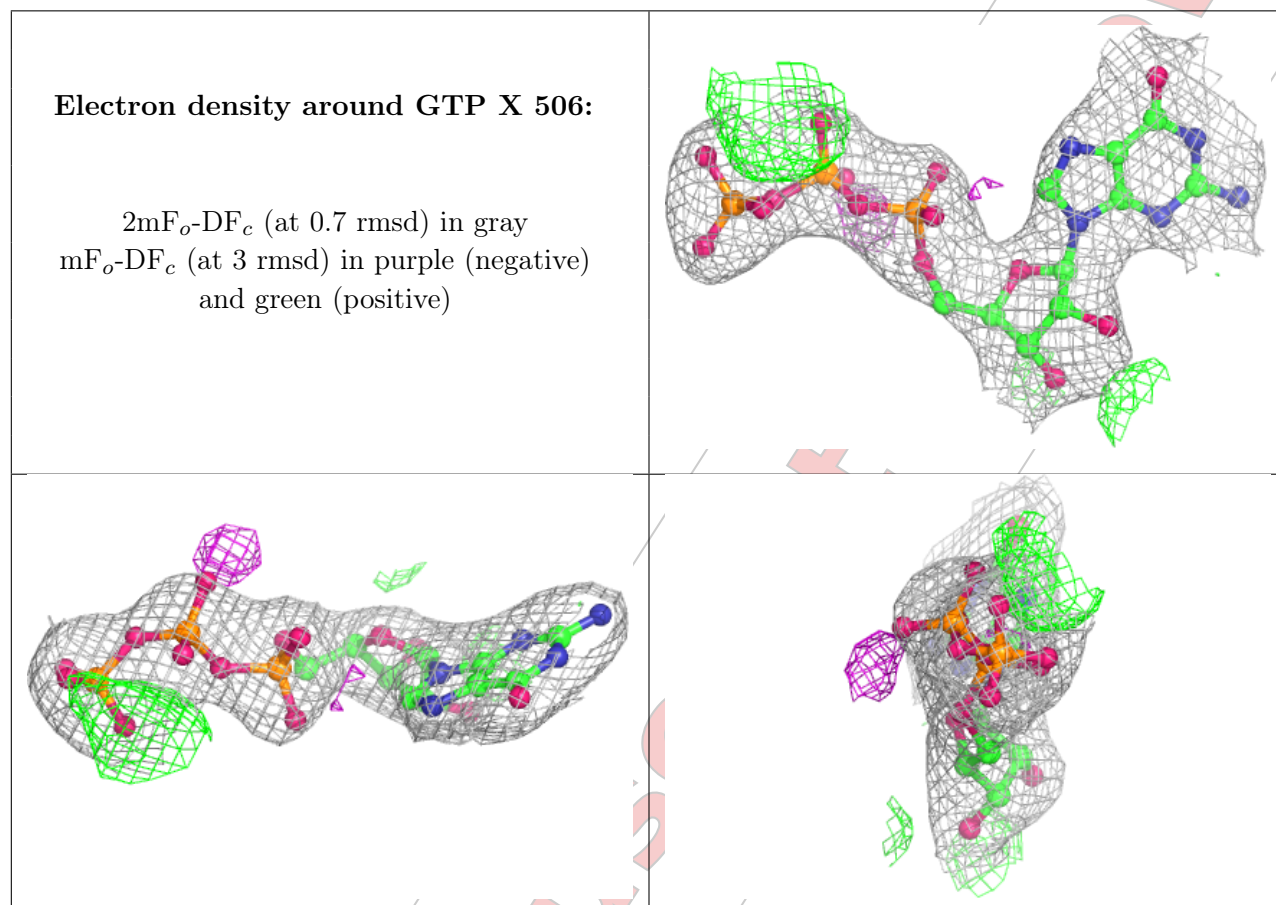

## 6.5 Other polymers [i](#)

There are no such residues in this entry.



# Preliminary Full wwPDB X-ray Structure Validation Report ⓘ

Feb 15, 2023 – 07:39 pm GMT

Deposition ID : D\_1292128601

**This wwPDB validation report is NOT for manuscript review**

This is a Preliminary Full wwPDB X-ray Structure Validation Report.

This report is produced by the wwPDB Deposition System during initial deposition but before annotation of the structure.

We welcome your comments at [validation@mail.wwpdb.org](mailto:validation@mail.wwpdb.org)

A user guide is available at

<https://www.wwpdb.org/validation/2017/XrayValidationReportHelp>

with specific help available everywhere you see the ⓘ symbol.

The types of validation reports are described at

<http://www.wwpdb.org/validation/2017/FAQs#types>.

---

The following versions of software and data (see [references ⓘ](#)) were used in the production of this report:

|                                |   |                                                                    |
|--------------------------------|---|--------------------------------------------------------------------|
| MolProbity                     | : | 4.02b-467                                                          |
| Mogul                          | : | 1.8.4, CSD as541be (2020)                                          |
| Xtriage (Phenix)               | : | 1.13                                                               |
| EDS                            | : | 2.32.1                                                             |
| buster-report                  | : | 1.1.7 (2018)                                                       |
| Percentile statistics          | : | 20191225.v01 (using entries in the PDB archive December 25th 2019) |
| Refmac                         | : | 5.8.0158                                                           |
| CCP4                           | : | 7.0.044 (Gargrove)                                                 |
| Ideal geometry (proteins)      | : | Engh & Huber (2001)                                                |
| Ideal geometry (DNA, RNA)      | : | Parkinson et al. (1996)                                            |
| Validation Pipeline (wwPDB-VP) | : | 2.32.1                                                             |

# 1 Overall quality at a glance i

The following experimental techniques were used to determine the structure:

*X-RAY DIFFRACTION*

The reported resolution of this entry is 2.70 Å.

Percentile scores (ranging between 0-100) for global validation metrics of the entry are shown in the following graphic. The table shows the number of entries on which the scores are based.

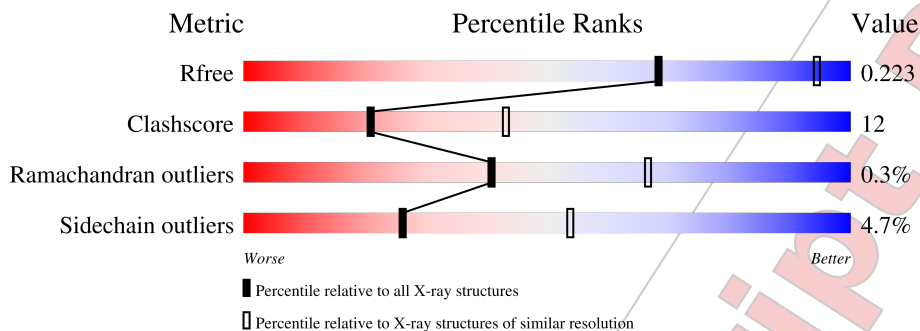

| Metric                | Whole archive<br>(#Entries) | Similar resolution<br>(#Entries, resolution range(Å)) |
|-----------------------|-----------------------------|-------------------------------------------------------|
| $R_{free}$            | 130704                      | 2808 (2.70-2.70)                                      |
| Clashscore            | 141614                      | 3122 (2.70-2.70)                                      |
| Ramachandran outliers | 138981                      | 3069 (2.70-2.70)                                      |
| Sidechain outliers    | 138945                      | 3069 (2.70-2.70)                                      |

The table below summarises the geometric issues observed across the polymeric chains and their fit to the electron density. The red, orange, yellow and green segments of the lower bar indicate the fraction of residues that contain outliers for  $\geq 3$ , 2, 1 and 0 types of geometric quality criteria respectively. A grey segment represents the fraction of residues that are not modelled. The numeric value for each fraction is indicated below the corresponding segment, with a dot representing fractions  $\leq 5\%$ .

| Mol | Chain | Length | Quality of chain |
|-----|-------|--------|------------------|
| 1   | A     | 439    | 72% 26% .        |
| 2   | B     | 428    | 70% 28% .        |
| 3   | C     | 440    | 82% 18%          |
| 4   | D     | 431    | 68% 29% .        |
| 5   | E     | 121    | 78% 21% .        |
| 6   | F     | 320    | 69% 29% .        |

## 2 Entry composition [i](#)

There are 13 unique types of molecules in this entry. The entry contains 34805 atoms, of which 17172 are hydrogens and 0 are deuteriums.

In the tables below, the ZeroOcc column contains the number of atoms modelled with zero occupancy, the AltConf column contains the number of residues with at least one atom in alternate conformation and the Trace column contains the number of residues modelled with at most 2 atoms.

- Molecule 1 is a protein.

| Mol | Chain | Residues | Atoms |      |      |     |     | ZeroOcc | AltConf | Trace |   |
|-----|-------|----------|-------|------|------|-----|-----|---------|---------|-------|---|
|     |       |          | Total | C    | H    | N   | O   |         |         |       | S |
| 1   | A     | 439      | 6888  | 2204 | 3414 | 585 | 661 | 24      | 0       | 10    | 0 |

- Molecule 2 is a protein.

| Mol | Chain | Residues | Atoms |      |      |     |     | ZeroOcc | AltConf | Trace |   |
|-----|-------|----------|-------|------|------|-----|-----|---------|---------|-------|---|
|     |       |          | Total | C    | H    | N   | O   |         |         |       | S |
| 2   | B     | 428      | 6733  | 2148 | 3317 | 581 | 660 | 27      | 2       | 11    | 0 |

- Molecule 3 is a protein.

| Mol | Chain | Residues | Atoms |      |      |     |     | ZeroOcc | AltConf | Trace |   |
|-----|-------|----------|-------|------|------|-----|-----|---------|---------|-------|---|
|     |       |          | Total | C    | H    | N   | O   |         |         |       | S |
| 3   | C     | 440      | 6884  | 2203 | 3405 | 586 | 666 | 24      | 0       | 10    | 0 |

- Molecule 4 is a protein.

| Mol | Chain | Residues | Atoms |      |      |     |     | ZeroOcc | AltConf | Trace |   |
|-----|-------|----------|-------|------|------|-----|-----|---------|---------|-------|---|
|     |       |          | Total | C    | H    | N   | O   |         |         |       | S |
| 4   | D     | 431      | 6705  | 2140 | 3299 | 580 | 658 | 28      | 0       | 4     | 0 |

- Molecule 5 is a protein.

| Mol | Chain | Residues | Atoms |     |      |     |     | ZeroOcc | AltConf | Trace |   |
|-----|-------|----------|-------|-----|------|-----|-----|---------|---------|-------|---|
|     |       |          | Total | C   | H    | N   | O   |         |         |       | S |
| 5   | E     | 121      | 2046  | 625 | 1035 | 182 | 198 | 6       | 0       | 2     | 0 |

- Molecule 6 is a protein.

| Mol | Chain | Residues | Atoms |      |      |     |     | ZeroOcc | AltConf | Trace |   |
|-----|-------|----------|-------|------|------|-----|-----|---------|---------|-------|---|
|     |       |          | Total | C    | H    | N   | O   |         |         |       | S |
| 6   | F     | 320      | 5269  | 1707 | 2633 | 437 | 478 | 14      | 0       | 4     | 0 |

- Molecule 7 is GUANOSINE-5'-TRIPHOSPHATE (three-letter code: GTP) (formula:  $C_{10}H_{16}N_5O_{14}P_3$ ).

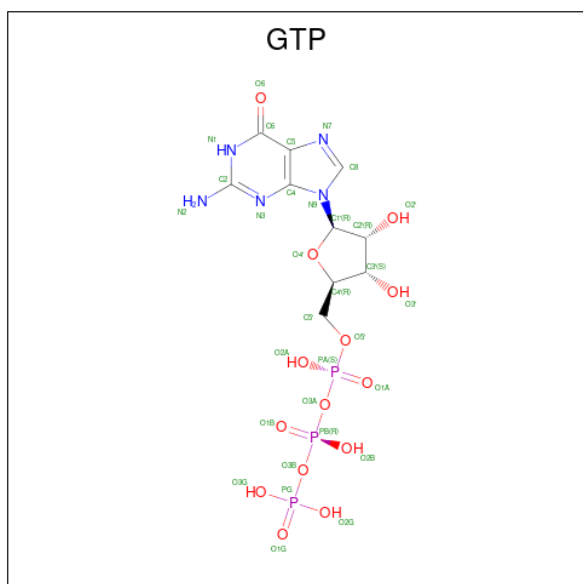

| Mol | Chain | Residues | Atoms |    |    |   |    | ZeroOcc | AltConf |   |
|-----|-------|----------|-------|----|----|---|----|---------|---------|---|
| 7   | X     | 1        | Total | C  | H  | N | O  | P       | 0       | 0 |
|     |       |          | 44    | 10 | 12 | 5 | 14 | 3       |         |   |
| 7   | X     | 1        | Total | C  | H  | N | O  | P       | 0       | 0 |
|     |       |          | 44    | 10 | 12 | 5 | 14 | 3       |         |   |

- Molecule 8 is MAGNESIUM ION (three-letter code: MG) (formula: Mg).

| Mol | Chain | Residues | Atoms |    | ZeroOcc | AltConf |
|-----|-------|----------|-------|----|---------|---------|
| 8   | X     | 1        | Total | Mg | 0       | 0       |
|     |       |          | 1     | 1  |         |         |
| 8   | X     | 1        | Total | Mg | 0       | 0       |
|     |       |          | 1     | 1  |         |         |
| 8   | X     | 1        | Total | Mg | 0       | 0       |
|     |       |          | 1     | 1  |         |         |
| 8   | X     | 1        | Total | Mg | 0       | 0       |
|     |       |          | 1     | 1  |         |         |

- Molecule 9 is CALCIUM ION (three-letter code: CA) (formula: Ca).

| Mol | Chain | Residues | Atoms |    | ZeroOcc | AltConf |
|-----|-------|----------|-------|----|---------|---------|
| 9   | X     | 1        | Total | Ca | 0       | 0       |
|     |       |          | 1     | 1  |         |         |
| 9   | X     | 1        | Total | Ca | 0       | 0       |
|     |       |          | 1     | 1  |         |         |

- Molecule 10 is GUANOSINE-5'-DIPHOSPHATE (three-letter code: GDP) (formula:  $C_{10}H_{15}N_5O_{11}P_2$ ).



| Mol | Chain | Residues | Atoms |    |    |   |    | ZeroOcc | AltConf |   |
|-----|-------|----------|-------|----|----|---|----|---------|---------|---|
|     |       |          | Total | C  | H  | N | O  |         |         | P |
| 10  | X     | 1        | Total | C  | H  | N | O  | P       | 0       | 0 |
|     |       |          | 40    | 10 | 12 | 5 | 11 | 2       |         |   |
| 10  | X     | 1        | Total | C  | H  | N | O  | P       | 0       | 0 |
|     |       |          | 40    | 10 | 12 | 5 | 11 | 2       |         |   |

- Molecule 11 is a ligand with the chemical component id SQB but its atom names do not match the existing wwPDB Chemical Component Dictionary definition for SQB. Consequently no firm identification of ligand chemistry can be made. Once the structure is annotated then an identification and diagram will be given here.

| Mol | Chain | Residues | Atoms |    |    |   |   | ZeroOcc | AltConf |   |
|-----|-------|----------|-------|----|----|---|---|---------|---------|---|
|     |       |          | Total | Br | C  | H | N |         |         | O |
| 11  | X     | 1        | Total | Br | C  | H | N | O       | 0       | 0 |
|     |       |          | 31    | 1  | 17 | 7 | 2 | 4       |         |   |

- Molecule 12 is PHOSPHOMETHYLPHOSPHONIC ACID ADENYLATE ESTER (three-letter code: ACP) (formula:  $C_{11}H_{18}N_5O_{12}P_3$ ).



| Mol | Chain | Residues | Atoms |    |    |   |    | ZeroOcc | AltConf |   |
|-----|-------|----------|-------|----|----|---|----|---------|---------|---|
|     |       |          | Total | C  | H  | N | O  |         |         | P |
| 12  | X     | 1        | 45    | 11 | 14 | 5 | 12 | 3       | 0       | 0 |

- Molecule 13 is water.

| Mol | Chain | Residues | Atoms |    | ZeroOcc | AltConf |
|-----|-------|----------|-------|----|---------|---------|
| 13  | G     | 30       | Total | O  | 0       | 0       |
|     |       |          | 30    | 30 |         |         |

### 3 Residue-property plots

These plots are drawn for all protein, RNA, DNA and oligosaccharide chains in the entry. The first graphic for a chain summarises the proportions of the various outlier classes displayed in the second graphic. The second graphic shows the sequence view annotated by issues in geometry. Residues are color-coded according to the number of geometric quality criteria for which they contain at least one outlier: green = 0, yellow = 1, orange = 2 and red = 3 or more. Stretches of 2 or more consecutive residues without any outlier are shown as a green connector. Residues present in the sample, but not in the model, are shown in grey.

- Molecule 1:

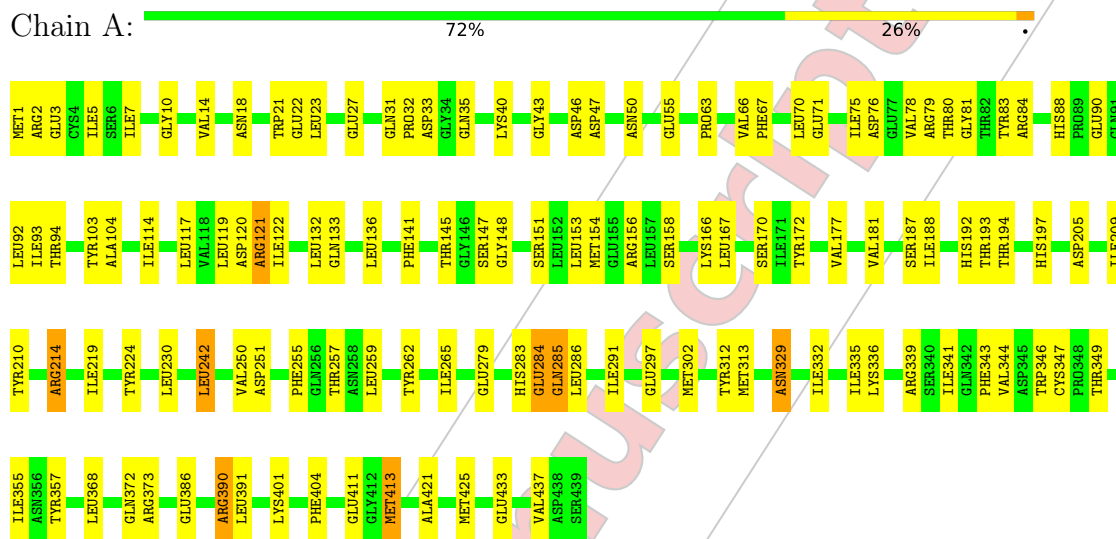

- Molecule 2:

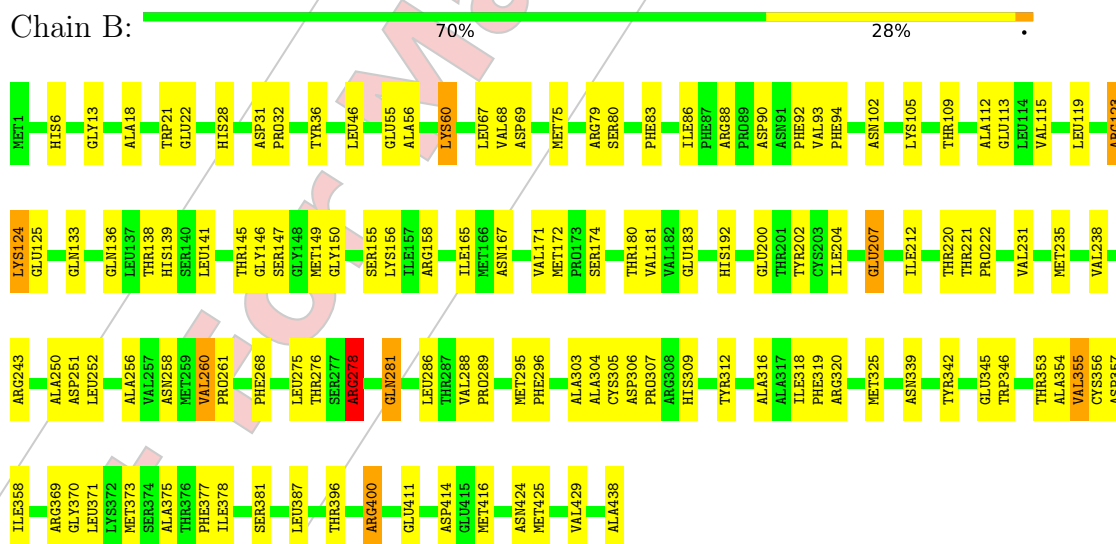

- Molecule 3:

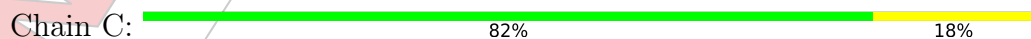

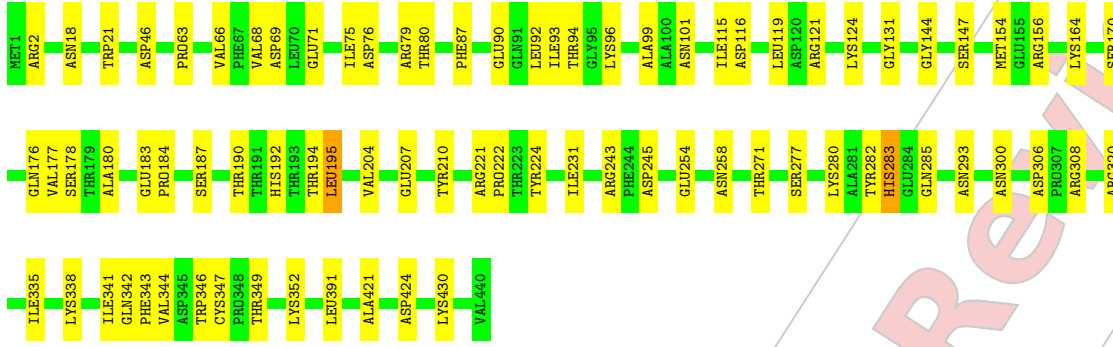

• Molecule 4:

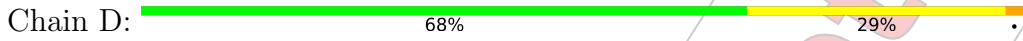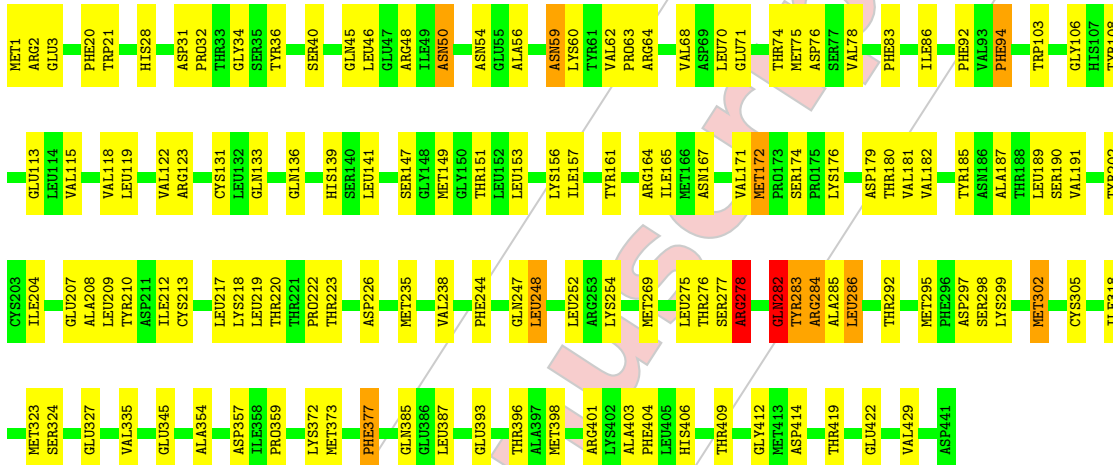

• Molecule 5:

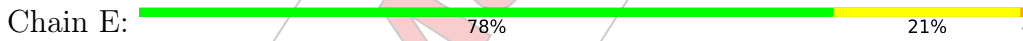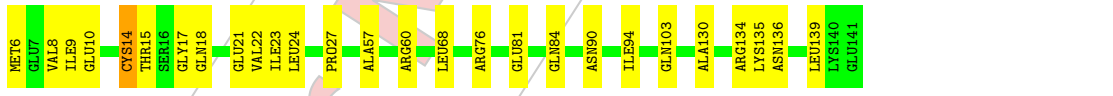

• Molecule 6:

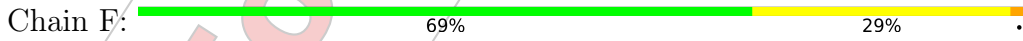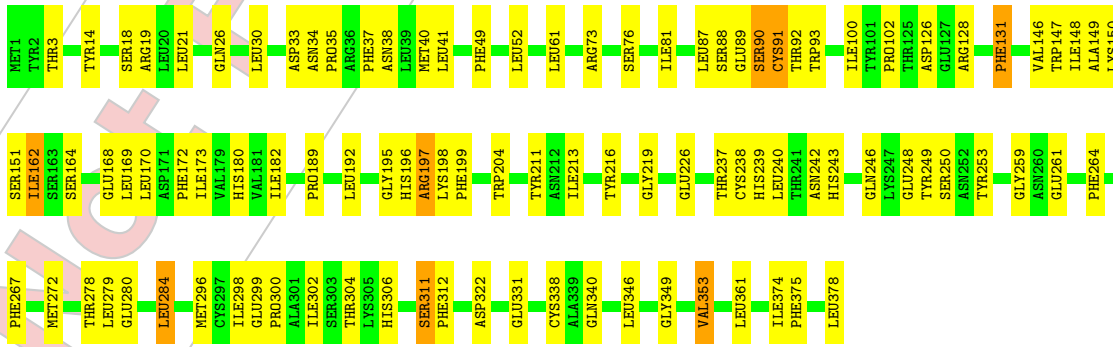

## 4 Data and refinement statistics i

| Property                                                                | Value                                                       | Source           |
|-------------------------------------------------------------------------|-------------------------------------------------------------|------------------|
| Space group                                                             | P 21 21 21                                                  | Depositor        |
| Cell constants<br>a, b, c, $\alpha$ , $\beta$ , $\gamma$                | 106.65Å 160.33Å 180.95Å<br>90.00° 90.00° 90.00°             | Depositor        |
| Resolution (Å)                                                          | 15.35 – 2.70<br>15.37 – 2.03                                | Depositor<br>EDS |
| % Data completeness<br>(in resolution range)                            | 99.9 (15.35-2.70)<br>56.8 (15.37-2.03)                      | Depositor<br>EDS |
| $R_{merge}$                                                             | (Not available)                                             | Depositor        |
| $R_{sym}$                                                               | (Not available)                                             | Depositor        |
| $\langle I/\sigma(I) \rangle$ <sup>1</sup>                              | 1764.17 (at 2.03Å)                                          | Xtrriage         |
| Refinement program                                                      | .                                                           | Depositor        |
| R, $R_{free}$                                                           | 0.168 , 0.217<br>0.184 , 0.223                              | Depositor<br>DCC |
| $R_{free}$ test set                                                     | 1974 reflections (1.74%)                                    | wwPDB-VP         |
| Wilson B-factor (Å <sup>2</sup> )                                       | -9.9                                                        | Xtrriage         |
| Anisotropy                                                              | -0.596                                                      | Xtrriage         |
| Bulk solvent $k_{sol}$ (e/Å <sup>3</sup> ), $B_{sol}$ (Å <sup>2</sup> ) | 0.39 , 71.4                                                 | EDS              |
| L-test for twinning <sup>2</sup>                                        | $\langle  L  \rangle = 0.49$ , $\langle L^2 \rangle = 0.32$ | Xtrriage         |
| Estimated twinning fraction                                             | No twinning to report.                                      | Xtrriage         |
| $F_o, F_c$ correlation                                                  | 0.65                                                        | EDS              |
| Total number of atoms                                                   | 34805                                                       | wwPDB-VP         |
| Average B, all atoms (Å <sup>2</sup> )                                  | 85.0                                                        | wwPDB-VP         |

Xtrriage's analysis on translational NCS is as follows: *The largest off-origin peak in the Patterson function is 2.49% of the height of the origin peak. No significant pseudotranslation is detected.*

<sup>1</sup>Intensities estimated from amplitudes.

<sup>2</sup>Theoretical values of  $\langle |L| \rangle$ ,  $\langle L^2 \rangle$  for acentric reflections are 0.5, 0.333 respectively for untwinned datasets, and 0.375, 0.2 for perfectly twinned datasets.

## 5 Model quality [i](#)

### 5.1 Standard geometry [i](#)

Bond lengths and bond angles in the following residue types are not validated in this section: ACP, GTP, GDP, MG, SQB, CA

The Z score for a bond length (or angle) is the number of standard deviations the observed value is removed from the expected value. A bond length (or angle) with  $|Z| > 5$  is considered an outlier worth inspection. RMSZ is the root-mean-square of all Z scores of the bond lengths (or angles).

| Mol | Chain | Bond lengths |         | Bond angles |         |
|-----|-------|--------------|---------|-------------|---------|
|     |       | RMSZ         | # Z  >5 | RMSZ        | # Z  >5 |
| 1   | A     | 0.29         | 0/3582  | 0.49        | 0/4864  |
| 2   | B     | 0.36         | 0/3527  | 0.55        | 0/4776  |
| 3   | C     | 0.33         | 0/3593  | 0.51        | 0/4878  |
| 4   | D     | 0.33         | 0/3493  | 0.53        | 0/4733  |
| 5   | E     | 0.25         | 0/1025  | 0.44        | 0/1359  |
| 6   | F     | 0.34         | 0/2705  | 0.54        | 0/3653  |
| All | All   | 0.32         | 0/17925 | 0.52        | 0/24263 |

Chiral center outliers are detected by calculating the chiral volume of a chiral center and verifying if the center is modelled as a planar moiety or with the opposite hand. A planarity outlier is detected by checking planarity of atoms in a peptide group, atoms in a mainchain group or atoms of a sidechain that are expected to be planar.

| Mol | Chain | #Chirality outliers | #Planarity outliers |
|-----|-------|---------------------|---------------------|
| 1   | A     | 0                   | 2                   |
| 2   | B     | 0                   | 2                   |
| 3   | C     | 0                   | 2                   |
| 4   | D     | 0                   | 1                   |
| All | All   | 0                   | 7                   |

There are no bond length outliers.

There are no bond angle outliers.

There are no chirality outliers.

All (7) planarity outliers are listed below:

| Mol | Chain | Res | Type | Group     |
|-----|-------|-----|------|-----------|
| 1   | A     | 121 | ARG  | Sidechain |
| 1   | A     | 214 | ARG  | Sidechain |
| 2   | B     | 123 | ARG  | Sidechain |

*Continued on next page...*

Continued from previous page...

| Mol | Chain | Res | Type | Group     |
|-----|-------|-----|------|-----------|
| 2   | B     | 278 | ARG  | Sidechain |
| 3   | C     | 243 | ARG  | Sidechain |
| 3   | C     | 320 | ARG  | Sidechain |
| 4   | D     | 278 | ARG  | Sidechain |

## 5.2 Too-close contacts [i](#)

In the following table, the Non-H and H(model) columns list the number of non-hydrogen atoms and hydrogen atoms in the chain respectively. The H(added) column lists the number of hydrogen atoms added and optimized by MolProbity. The Clashes column lists the number of clashes within the asymmetric unit, whereas Symm-Clashes lists symmetry-related clashes.

| Mol | Chain | Non-H | H(model) | H(added) | Clashes | Symm-Clashes |
|-----|-------|-------|----------|----------|---------|--------------|
| 1   | A     | 3474  | 3414     | 3412     | 96      | 0            |
| 2   | B     | 3416  | 3317     | 3309     | 95      | 0            |
| 3   | C     | 3479  | 3405     | 3392     | 47      | 0            |
| 4   | D     | 3406  | 3299     | 3298     | 106     | 0            |
| 5   | E     | 1011  | 1035     | 1035     | 26      | 0            |
| 6   | F     | 2636  | 2633     | 2632     | 68      | 0            |
| 7   | X     | 64    | 24       | 24       | 2       | 0            |
| 8   | X     | 4     | 0        | 0        | 0       | 0            |
| 9   | X     | 2     | 0        | 0        | 0       | 0            |
| 10  | X     | 56    | 24       | 24       | 1       | 0            |
| 11  | X     | 24    | 7        | 0        | 9       | 0            |
| 12  | X     | 31    | 14       | 14       | 2       | 0            |
| 13  | G     | 30    | 0        | 0        | 1       | 0            |
| All | All   | 17633 | 17172    | 17140    | 423     | 0            |

The all-atom clashscore is defined as the number of clashes found per 1000 atoms (including hydrogen atoms). The all-atom clashscore for this structure is 12.

All (423) close contacts within the same asymmetric unit are listed below, sorted by their clash magnitude.

| Atom-1           | Atom-2              | Interatomic distance (Å) | Clash overlap (Å) |
|------------------|---------------------|--------------------------|-------------------|
| 2:B:13:GLY:HA2   | 2:B:138[B]:THR:HG22 | 1.47                     | 0.93              |
| 4:D:181:VAL:O    | 4:D:398:MET:HE1     | 1.84                     | 0.78              |
| 2:B:256:ALA:O    | 2:B:260:VAL:HG13    | 1.85                     | 0.76              |
| 6:F:248:GLU:HG2  | 6:F:249:TYR:CD1     | 2.19                     | 0.76              |
| 4:D:292:THR:HG22 | 4:D:335:VAL:HG21    | 1.68                     | 0.75              |
| 1:A:79:ARG:HH22  | 1:A:94:THR:HG21     | 1.50                     | 0.75              |

Continued on next page...

*Continued from previous page...*

| Atom-1             | Atom-2           | Interatomic distance (Å) | Clash overlap (Å) |
|--------------------|------------------|--------------------------|-------------------|
| 3:C:293[B]:ASN:OD1 | 3:C:335:ILE:HD11 | 1.87                     | 0.75              |
| 1:A:93:ILE:HD11    | 1:A:121:ARG:HG3  | 1.69                     | 0.74              |
| 2:B:83:PHE:O       | 2:B:86:ILE:HG22  | 1.87                     | 0.74              |
| 6:F:3:THR:HG23     | 6:F:38:ASN:H     | 1.53                     | 0.73              |
| 2:B:156:LYS:HE2    | 5:E:76:ARG:NE    | 2.03                     | 0.73              |
| 4:D:180:THR:HG22   | 4:D:182:VAL:H    | 1.52                     | 0.73              |
| 6:F:278:THR:HG22   | 6:F:280:GLU:H    | 1.53                     | 0.72              |
| 2:B:268:PHE:HB3    | 2:B:378:ILE:CG2  | 2.19                     | 0.72              |
| 4:D:133:GLN:HE21   | 4:D:252:LEU:H    | 1.36                     | 0.72              |
| 2:B:6:HIS:CD2      | 2:B:21:TRP:HE1   | 2.08                     | 0.72              |
| 1:A:343:PHE:HB2    | 1:A:349:THR:HG22 | 1.72                     | 0.72              |
| 1:A:70:LEU:HD23    | 1:A:145:THR:OG1  | 1.90                     | 0.71              |
| 2:B:378:ILE:N      | 2:B:378:ILE:HD12 | 2.05                     | 0.71              |
| 4:D:180:THR:CG2    | 4:D:182:VAL:HG22 | 2.20                     | 0.71              |
| 1:A:104:ALA:HB2    | 1:A:413:MET:HE3  | 1.73                     | 0.71              |
| 2:B:325:MET:HG3    | 2:B:355:VAL:HG21 | 1.74                     | 0.69              |
| 2:B:370:GLY:O      | 2:B:371:LEU:HD12 | 1.92                     | 0.69              |
| 4:D:147:SER:O      | 4:D:151:THR:HG23 | 1.92                     | 0.69              |
| 2:B:221:THR:HG23   | 2:B:221:THR:O    | 1.92                     | 0.69              |
| 4:D:324:SER:OG     | 4:D:327:GLU:HB2  | 1.92                     | 0.68              |
| 2:B:165:ILE:HG21   | 2:B:252:LEU:HB3  | 1.74                     | 0.68              |
| 4:D:75:MET:HG2     | 4:D:92:PHE:HD2   | 1.58                     | 0.68              |
| 4:D:118:VAL:HG11   | 4:D:153:LEU:HD21 | 1.75                     | 0.67              |
| 3:C:119:LEU:HD11   | 3:C:156:ARG:HB3  | 1.77                     | 0.67              |
| 6:F:100:ILE:HD13   | 6:F:173:ILE:HD13 | 1.76                     | 0.67              |
| 4:D:286:LEU:HD13   | 4:D:373:MET:HG2  | 1.77                     | 0.66              |
| 4:D:385:GLN:HB2    | 4:D:429:VAL:HG13 | 1.78                     | 0.65              |
| 6:F:248:GLU:HG2    | 6:F:249:TYR:CE1  | 2.30                     | 0.65              |
| 1:A:40:LYS:HE3     | 1:A:40:LYS:CA    | 2.26                     | 0.65              |
| 1:A:104:ALA:HB2    | 1:A:413:MET:CE   | 2.27                     | 0.65              |
| 1:A:386:GLU:O      | 1:A:390:ARG:HG3  | 1.97                     | 0.65              |
| 6:F:298:ILE:HD12   | 6:F:302:ILE:HD13 | 1.78                     | 0.65              |
| 2:B:378:ILE:HD12   | 2:B:378:ILE:H    | 1.61                     | 0.64              |
| 6:F:149:ALA:O      | 6:F:150:LYS:HD2  | 1.97                     | 0.63              |
| 1:A:286:LEU:HD22   | 1:A:286:LEU:H    | 1.63                     | 0.63              |
| 1:A:339:ARG:HB2    | 1:A:341:ILE:HD11 | 1.80                     | 0.63              |
| 4:D:174:SER:HB2    | 4:D:207:GLU:HB2  | 1.80                     | 0.63              |
| 2:B:268:PHE:HB3    | 2:B:378:ILE:HG23 | 1.81                     | 0.63              |
| 3:C:254:GLU:HG2    | 3:C:352:LYS:HE2  | 1.80                     | 0.63              |
| 1:A:81:GLY:O       | 1:A:84:ARG:HG2   | 1.99                     | 0.63              |
| 5:E:57:ALA:HA      | 5:E:60:ARG:NH1   | 2.12                     | 0.63              |

*Continued on next page...*

Continued from previous page...

| Atom-1              | Atom-2              | Interatomic distance (Å) | Clash overlap (Å) |
|---------------------|---------------------|--------------------------|-------------------|
| 1:A:344:VAL:HG22    | 1:A:347:CYS:HB2     | 1.82                     | 0.62              |
| 4:D:56:ALA:HB3      | 4:D:60:LYS:HB2      | 1.81                     | 0.62              |
| 6:F:149:ALA:HB2     | 6:F:182:ILE:HG12    | 1.82                     | 0.62              |
| 1:A:285:GLN:HG3     | 1:A:372[B]:GLN:OE1  | 1.99                     | 0.62              |
| 4:D:59:ASN:O        | 4:D:59:ASN:ND2      | 2.28                     | 0.61              |
| 4:D:136:GLN:HA      | 4:D:167:ASN:O       | 2.00                     | 0.61              |
| 1:A:40:LYS:HE3      | 1:A:40:LYS:HA       | 1.82                     | 0.61              |
| 4:D:118:VAL:CG1     | 4:D:153:LEU:HD21    | 2.31                     | 0.61              |
| 1:A:177:VAL:HG12    | 7:X:501:GTP:O2'     | 2.01                     | 0.61              |
| 2:B:316:ALA:HB1     | 11:X:506:SQB:C16    | 2.31                     | 0.61              |
| 1:A:2:ARG:HB3       | 1:A:133:GLN:HG2     | 1.83                     | 0.61              |
| 2:B:378:ILE:HD11    | 11:X:506:SQB:BR     | 2.57                     | 0.60              |
| 4:D:403:ALA:HB1     | 4:D:404:PHE:HD1     | 1.66                     | 0.60              |
| 1:A:291:ILE:HD13    | 1:A:373:ARG:HG3     | 1.82                     | 0.60              |
| 3:C:187:SER:HB3     | 3:C:391:LEU:HD21    | 1.83                     | 0.60              |
| 6:F:148:ILE:HB      | 6:F:162:ILE:HG23    | 1.82                     | 0.60              |
| 6:F:237:THR:HG21    | 6:F:249:TYR:O       | 2.01                     | 0.60              |
| 2:B:119:LEU:HD11    | 2:B:156:LYS:HB3     | 1.82                     | 0.60              |
| 3:C:93:ILE:HD11     | 3:C:121:ARG:HG3     | 1.84                     | 0.60              |
| 1:A:21:TRP:CZ3      | 1:A:63:PRO:HB3      | 2.36                     | 0.60              |
| 1:A:7:ILE:HG23      | 1:A:66[B]:VAL:HG13  | 1.84                     | 0.59              |
| 1:A:279:GLU:HA      | 1:A:279:GLU:OE1     | 2.02                     | 0.59              |
| 2:B:69:ASP:O        | 2:B:94:PHE:HA       | 2.03                     | 0.59              |
| 4:D:171:VAL:HA      | 4:D:204:ILE:O       | 2.03                     | 0.59              |
| 6:F:195:GLY:HA3     | 6:F:197:ARG:HD3     | 1.83                     | 0.59              |
| 1:A:136[A]:LEU:HD23 | 1:A:167:LEU:HB2     | 1.84                     | 0.59              |
| 4:D:20:PHE:HB2      | 4:D:235:MET:HE2     | 1.83                     | 0.58              |
| 4:D:36:TYR:CE2      | 4:D:46:LEU:HD11     | 2.37                     | 0.58              |
| 4:D:393:GLU:O       | 4:D:396:THR:HG22    | 2.02                     | 0.58              |
| 4:D:179:ASP:HB2     | 10:X:509:GDP:H3'    | 1.85                     | 0.58              |
| 1:A:166:LYS:HE2     | 1:A:197:HIS:O       | 2.03                     | 0.58              |
| 1:A:336:LYS:C       | 1:A:336:LYS:HD3     | 2.23                     | 0.58              |
| 6:F:3:THR:HG23      | 6:F:38:ASN:N        | 2.17                     | 0.58              |
| 1:A:2:ARG:CB        | 1:A:133:GLN:HG2     | 2.33                     | 0.58              |
| 6:F:100:ILE:HD11    | 6:F:180:HIS:HB2     | 1.84                     | 0.58              |
| 2:B:318:ILE:HG12    | 11:X:506:SQB:BR     | 2.59                     | 0.58              |
| 5:E:6:MET:HG2       | 5:E:24:LEU:CD2      | 2.34                     | 0.58              |
| 4:D:223:THR:HG22    | 4:D:226:ASP:OD2     | 2.04                     | 0.57              |
| 6:F:213:ILE:HG22    | 6:F:378[B]:LEU:HD12 | 1.84                     | 0.57              |
| 1:A:336:LYS:HD3     | 1:A:336:LYS:O       | 2.04                     | 0.57              |
| 6:F:374:ILE:HD11    | 6:F:375:PHE:CE2     | 2.40                     | 0.57              |

Continued on next page...

Continued from previous page...

| Atom-1            | Atom-2              | Interatomic distance (Å) | Clash overlap (Å) |
|-------------------|---------------------|--------------------------|-------------------|
| 4:D:164:ARG:HG2   | 4:D:164:ARG:HH11    | 1.67                     | 0.57              |
| 4:D:209:LEU:HD21  | 4:D:302:MET:HG3     | 1.87                     | 0.57              |
| 1:A:151:SER:HB2   | 1:A:193:THR:CG2     | 2.35                     | 0.57              |
| 4:D:269[B]:MET:CE | 4:D:305:CYS:HB2     | 2.35                     | 0.57              |
| 4:D:180:THR:HG21  | 4:D:182:VAL:HG22    | 1.87                     | 0.57              |
| 6:F:3:THR:OG1     | 6:F:30:LEU:HD11     | 2.04                     | 0.57              |
| 2:B:13:GLY:CA     | 2:B:138[B]:THR:HG22 | 2.27                     | 0.56              |
| 6:F:259:GLY:O     | 6:F:261:GLU:HG3     | 2.05                     | 0.56              |
| 1:A:344:VAL:CG2   | 1:A:347:CYS:HB2     | 2.35                     | 0.56              |
| 3:C:277:SER:OG    | 3:C:280:LYS:HG3     | 2.05                     | 0.56              |
| 4:D:172:MET:HE2   | 4:D:172:MET:N       | 2.21                     | 0.56              |
| 4:D:212:ILE:HG22  | 4:D:217:LEU:HD23    | 1.86                     | 0.56              |
| 1:A:344:VAL:HG21  | 1:A:346:TRP:CE2     | 2.41                     | 0.56              |
| 4:D:141:LEU:HD22  | 4:D:190:SER:HB3     | 1.87                     | 0.56              |
| 5:E:9:ILE:HD13    | 5:E:23:ILE:HD12     | 1.87                     | 0.56              |
| 2:B:295:MET:HE3   | 2:B:296:PHE:CE1     | 2.40                     | 0.56              |
| 6:F:278:THR:HG22  | 6:F:280:GLU:N       | 2.19                     | 0.56              |
| 4:D:113:GLU:OE2   | 4:D:113:GLU:HA      | 2.06                     | 0.56              |
| 4:D:103:TRP:CE3   | 4:D:189:LEU:HD13    | 2.41                     | 0.55              |
| 4:D:74:THR:O      | 4:D:78:VAL:HG13     | 2.06                     | 0.55              |
| 6:F:304:THR:HG21  | 6:F:311:SER:HB2     | 1.87                     | 0.55              |
| 2:B:102:ASN:HB3   | 2:B:105[A]:LYS:HG3  | 1.88                     | 0.55              |
| 4:D:133:GLN:NE2   | 4:D:252:LEU:H       | 2.04                     | 0.55              |
| 6:F:146:VAL:HG22  | 6:F:164:SER:OG      | 2.06                     | 0.55              |
| 4:D:161:TYR:HB3   | 4:D:164:ARG:HG3     | 1.88                     | 0.55              |
| 4:D:284:ARG:NH2   | 4:D:285:ALA:H       | 2.04                     | 0.55              |
| 4:D:180:THR:HG22  | 4:D:182:VAL:HG22    | 1.88                     | 0.55              |
| 2:B:202:TYR:CE1   | 2:B:238:VAL:HG21    | 2.42                     | 0.55              |
| 6:F:280:GLU:HA    | 6:F:284[A]:LEU:HB2  | 1.89                     | 0.55              |
| 4:D:75:MET:HG2    | 4:D:92:PHE:CD2      | 2.40                     | 0.54              |
| 6:F:100:ILE:HD12  | 6:F:100:ILE:O       | 2.07                     | 0.54              |
| 1:A:31:GLN:HB3    | 1:A:32:PRO:HD2      | 1.89                     | 0.54              |
| 6:F:213:ILE:CG2   | 6:F:378[B]:LEU:HD12 | 2.38                     | 0.54              |
| 2:B:86:ILE:HG12   | 2:B:86:ILE:O        | 2.08                     | 0.54              |
| 2:B:31:ASP:HB2    | 2:B:32:PRO:CD       | 2.37                     | 0.54              |
| 2:B:295:MET:SD    | 2:B:375:ALA:HB1     | 2.48                     | 0.54              |
| 1:A:33:ASP:OD1    | 1:A:35:GLN:HG2      | 2.08                     | 0.54              |
| 6:F:374:ILE:HD11  | 6:F:375:PHE:CZ      | 2.43                     | 0.54              |
| 1:A:172:TYR:HB3   | 1:A:205:ASP:HA      | 1.90                     | 0.53              |
| 5:E:6:MET:HG2     | 5:E:24:LEU:HD22     | 1.90                     | 0.53              |
| 2:B:319:PHE:HB2   | 2:B:355:VAL:HG12    | 1.90                     | 0.53              |

Continued on next page...

Continued from previous page...

| Atom-1            | Atom-2              | Interatomic distance (Å) | Clash overlap (Å) |
|-------------------|---------------------|--------------------------|-------------------|
| 6:F:49:PHE:HA     | 6:F:52:LEU:HD12     | 1.89                     | 0.53              |
| 2:B:318:ILE:HA    | 2:B:354:ALA:O       | 2.09                     | 0.53              |
| 3:C:154:MET:HG3   | 3:C:194[A]:THR:HG23 | 1.90                     | 0.53              |
| 2:B:56:ALA:HB3    | 2:B:60:LYS:HG2      | 1.91                     | 0.53              |
| 1:A:433:GLU:O     | 1:A:437:VAL:HB      | 2.08                     | 0.53              |
| 2:B:67:LEU:N      | 2:B:67:LEU:HD12     | 2.24                     | 0.53              |
| 2:B:69:ASP:HB2    | 2:B:75:MET:HE3      | 1.91                     | 0.53              |
| 4:D:218:LYS:O     | 4:D:219:LEU:HD23    | 2.09                     | 0.53              |
| 4:D:164:ARG:HG2   | 4:D:164:ARG:NH1     | 2.24                     | 0.53              |
| 2:B:75:MET:HG3    | 2:B:94:PHE:HD1      | 1.75                     | 0.53              |
| 2:B:158[B]:ARG:CZ | 5:E:68:LEU:HD11     | 2.38                     | 0.52              |
| 2:B:316:ALA:HB1   | 11:X:506:SQB:O3     | 2.08                     | 0.52              |
| 6:F:61:LEU:HD11   | 6:F:312:PHE:HD1     | 1.74                     | 0.52              |
| 4:D:34:GLY:CA     | 4:D:86:ILE:HD11     | 2.38                     | 0.52              |
| 4:D:50:ASN:H      | 4:D:50:ASN:ND2      | 2.06                     | 0.52              |
| 1:A:209:ILE:HG23  | 1:A:230:LEU:HD23    | 1.90                     | 0.52              |
| 1:A:283:HIS:HD2   | 1:A:284:GLU:O       | 1.92                     | 0.52              |
| 3:C:96:LYS:HB2    | 3:C:96:LYS:NZ       | 2.25                     | 0.52              |
| 3:C:271:THR:HG23  | 3:C:300:ASN:O       | 2.10                     | 0.52              |
| 4:D:286:LEU:HD12  | 4:D:286:LEU:O       | 2.09                     | 0.52              |
| 6:F:128:ARG:CZ    | 6:F:170:LEU:HD22    | 2.40                     | 0.52              |
| 3:C:21:TRP:CZ3    | 3:C:63:PRO:HB3      | 2.45                     | 0.52              |
| 3:C:147:SER:HB2   | 3:C:190:THR:HB      | 1.91                     | 0.52              |
| 6:F:100:ILE:HA    | 6:F:126:ASP:HB2     | 1.90                     | 0.52              |
| 3:C:99:ALA:HB3    | 3:C:144:GLY:HA3     | 1.92                     | 0.52              |
| 4:D:220:THR:O     | 4:D:222:PRO:HD3     | 2.09                     | 0.52              |
| 2:B:124:LYS:HD3   | 2:B:125:GLU:HG2     | 1.92                     | 0.51              |
| 2:B:200:GLU:OE2   | 2:B:256:ALA:HB2     | 2.10                     | 0.51              |
| 4:D:21:TRP:CZ3    | 4:D:63:PRO:HB3      | 2.44                     | 0.51              |
| 6:F:204:TRP:CZ2   | 6:F:338:CYS:HA      | 2.45                     | 0.51              |
| 1:A:18:ASN:OD1    | 1:A:78:VAL:HG22     | 2.10                     | 0.51              |
| 5:E:57:ALA:HA     | 5:E:60:ARG:HH11     | 1.75                     | 0.51              |
| 6:F:242:ASN:O     | 6:F:246:GLN:HG2     | 2.11                     | 0.51              |
| 3:C:192:HIS:HD1   | 3:C:424:ASP:CB      | 2.24                     | 0.51              |
| 4:D:372:LYS:HD3   | 4:D:373:MET:HE3     | 1.93                     | 0.51              |
| 2:B:22[A]:GLU:HG2 | 2:B:83:PHE:CD1      | 2.46                     | 0.51              |
| 3:C:79:ARG:HG2    | 3:C:92:LEU:HD12     | 1.92                     | 0.51              |
| 6:F:102:PRO:HB3   | 6:F:173:ILE:CG2     | 2.40                     | 0.51              |
| 2:B:220:THR:O     | 2:B:222:PRO:HD3     | 2.11                     | 0.51              |
| 4:D:20:PHE:HB2    | 4:D:235:MET:CE      | 2.41                     | 0.51              |
| 4:D:75:MET:SD     | 4:D:94:PHE:HB3      | 2.51                     | 0.51              |

Continued on next page...

Continued from previous page...

| Atom-1             | Atom-2            | Interatomic distance (Å) | Clash overlap (Å) |
|--------------------|-------------------|--------------------------|-------------------|
| 4:D:248:LEU:HD12   | 4:D:354:ALA:HB2   | 1.93                     | 0.51              |
| 6:F:168:GLU:O      | 6:F:172:PHE:HB2   | 2.11                     | 0.51              |
| 2:B:67:LEU:HD22    | 2:B:92:PHE:CE2    | 2.46                     | 0.50              |
| 2:B:105[A]:LYS:HA  | 2:B:109:THR:OG1   | 2.11                     | 0.50              |
| 4:D:403:ALA:HB1    | 4:D:404:PHE:CD1   | 2.45                     | 0.50              |
| 1:A:133:GLN:OE1    | 1:A:251:ASP:HB2   | 2.12                     | 0.50              |
| 1:A:401:LYS:HE3    | 2:B:438:ALA:HB1   | 1.93                     | 0.50              |
| 2:B:141:LEU:HD12   | 2:B:172:MET:SD    | 2.52                     | 0.50              |
| 1:A:88:HIS:CE1     | 1:A:90:GLU:HG3    | 2.47                     | 0.50              |
| 2:B:276:THR:HG21   | 2:B:371:LEU:HD11  | 1.93                     | 0.50              |
| 2:B:306:ASP:HB3    | 2:B:309:HIS:ND1   | 2.25                     | 0.50              |
| 5:E:9:ILE:HD13     | 5:E:23:ILE:CD1    | 2.40                     | 0.50              |
| 2:B:180:THR:O      | 2:B:183:GLU:HG3   | 2.12                     | 0.50              |
| 4:D:176:LYS:HD3    | 4:D:210:TYR:CD2   | 2.46                     | 0.50              |
| 2:B:112:ALA:O      | 2:B:115:VAL:HG12  | 2.12                     | 0.50              |
| 3:C:180:ALA:HB3    | 3:C:183:GLU:HG3   | 1.93                     | 0.50              |
| 3:C:75:ILE:HD12    | 3:C:94:THR:HG22   | 1.93                     | 0.50              |
| 3:C:245:ASP:N      | 3:C:245:ASP:OD1   | 2.42                     | 0.50              |
| 3:C:176:GLN:HE22   | 3:C:207:GLU:HG3   | 1.77                     | 0.50              |
| 1:A:265:ILE:O      | 1:A:265:ILE:HG22  | 2.12                     | 0.49              |
| 1:A:297:GLU:OE2    | 6:F:306:HIS:ND1   | 2.44                     | 0.49              |
| 3:C:177:VAL:HG12   | 3:C:177:VAL:O     | 2.12                     | 0.49              |
| 2:B:174:SER:HB2    | 2:B:207:GLU:HB2   | 1.93                     | 0.49              |
| 4:D:31:ASP:HB2     | 4:D:32:PRO:CD     | 2.42                     | 0.49              |
| 5:E:81:GLU:O       | 5:E:84[B]:GLN:HG2 | 2.12                     | 0.49              |
| 5:E:135:LYS:HE2    | 5:E:139:LEU:HD11  | 1.94                     | 0.49              |
| 4:D:269[B]:MET:HE1 | 4:D:305:CYS:HB2   | 1.94                     | 0.49              |
| 6:F:219:GLY:HA3    | 6:F:264:PHE:CZ    | 2.48                     | 0.49              |
| 6:F:246:GLN:O      | 6:F:250:SER:OG    | 2.30                     | 0.49              |
| 1:A:40:LYS:HE3     | 1:A:40:LYS:O      | 2.11                     | 0.49              |
| 6:F:198:LYS:HG2    | 6:F:199:PHE:H     | 1.77                     | 0.49              |
| 1:A:103:TYR:CD2    | 1:A:148:GLY:HA2   | 2.48                     | 0.49              |
| 2:B:425:MET:O      | 2:B:429:VAL:HG23  | 2.12                     | 0.49              |
| 3:C:210:TYR:CZ     | 3:C:222:PRO:HD2   | 2.47                     | 0.49              |
| 2:B:318:ILE:CG1    | 11:X:506:SQB:BR   | 3.16                     | 0.49              |
| 6:F:91:CYS:C       | 6:F:93:TRP:H      | 2.16                     | 0.49              |
| 1:A:283:HIS:CD2    | 1:A:284:GLU:O     | 2.65                     | 0.49              |
| 1:A:187:SER:HB3    | 1:A:391:LEU:HD21  | 1.95                     | 0.48              |
| 6:F:14:TYR:HB3     | 6:F:41:LEU:HD13   | 1.95                     | 0.48              |
| 6:F:49:PHE:HA      | 6:F:52:LEU:CD1    | 2.43                     | 0.48              |
| 2:B:105[B]:LYS:HA  | 2:B:109:THR:OG1   | 2.13                     | 0.48              |

Continued on next page...

*Continued from previous page...*

| Atom-1             | Atom-2           | Interatomic distance (Å) | Clash overlap (Å) |
|--------------------|------------------|--------------------------|-------------------|
| 3:C:63:PRO:HG2     | 3:C:87:PHE:CE1   | 2.48                     | 0.48              |
| 3:C:183:GLU:N      | 3:C:184:PRO:CD   | 2.77                     | 0.48              |
| 4:D:119:LEU:O      | 4:D:123:ARG:HG3  | 2.12                     | 0.48              |
| 4:D:318:ILE:HG22   | 13:G:58:HOH:O    | 2.13                     | 0.48              |
| 6:F:102:PRO:HB3    | 6:F:173:ILE:HG22 | 1.93                     | 0.48              |
| 2:B:75:MET:HG3     | 2:B:94:PHE:CD1   | 2.48                     | 0.48              |
| 2:B:105[A]:LYS:HE2 | 2:B:411:GLU:OE2  | 2.13                     | 0.48              |
| 2:B:346:TRP:HE1    | 2:B:438:ALA:HB3  | 1.78                     | 0.48              |
| 4:D:278:ARG:CZ     | 4:D:278:ARG:HB3  | 2.43                     | 0.48              |
| 2:B:36:TYR:CZ      | 2:B:46:LEU:HD11  | 2.48                     | 0.48              |
| 2:B:320:ARG:HA     | 2:B:356:CYS:O    | 2.13                     | 0.48              |
| 2:B:378:ILE:CD1    | 11:X:506:SQB:BR  | 3.17                     | 0.48              |
| 2:B:28:HIS:NE2     | 2:B:243:ARG:HD2  | 2.29                     | 0.48              |
| 6:F:128:ARG:NH2    | 6:F:170:LEU:HD22 | 2.29                     | 0.48              |
| 4:D:153:LEU:O      | 4:D:157:ILE:HD12 | 2.14                     | 0.48              |
| 4:D:286:LEU:HD13   | 4:D:373:MET:CG   | 2.41                     | 0.48              |
| 6:F:26:GLN:NE2     | 6:F:361:LEU:HD22 | 2.27                     | 0.48              |
| 1:A:67:PHE:HB2     | 1:A:92:LEU:HD12  | 1.96                     | 0.48              |
| 1:A:119:LEU:HD11   | 1:A:156:ARG:HB3  | 1.94                     | 0.48              |
| 2:B:156:LYS:HE2    | 5:E:76:ARG:HE    | 1.75                     | 0.48              |
| 2:B:369:ARG:HD2    | 2:B:370:GLY:N    | 2.29                     | 0.48              |
| 4:D:213:CYS:HA     | 4:D:217:LEU:HB2  | 1.96                     | 0.48              |
| 1:A:210:TYR:CE2    | 1:A:214:ARG:HD3  | 2.49                     | 0.47              |
| 6:F:243:HIS:NE2    | 6:F:253:TYR:OH   | 2.46                     | 0.47              |
| 1:A:355:ILE:O      | 5:E:17:GLY:HA3   | 2.13                     | 0.47              |
| 3:C:282:TYR:O      | 3:C:283:HIS:CB   | 2.62                     | 0.47              |
| 4:D:275:LEU:O      | 4:D:277:SER:N    | 2.47                     | 0.47              |
| 1:A:114:ILE:HD12   | 1:A:117:LEU:HB3  | 1.96                     | 0.47              |
| 1:A:329:ASN:HD21   | 5:E:8:VAL:HG21   | 1.80                     | 0.47              |
| 4:D:31:ASP:HB2     | 4:D:32:PRO:HD2   | 1.95                     | 0.47              |
| 2:B:318:ILE:HG23   | 11:X:506:SQB:BR  | 2.69                     | 0.47              |
| 6:F:34:ASN:OD1     | 6:F:35:PRO:HD2   | 2.14                     | 0.47              |
| 1:A:23:LEU:O       | 1:A:27:GLU:HG3   | 2.14                     | 0.47              |
| 2:B:260:VAL:O      | 2:B:260:VAL:HG22 | 2.14                     | 0.47              |
| 4:D:103:TRP:HD1    | 4:D:147:SER:OG   | 1.98                     | 0.47              |
| 1:A:141:PHE:CE1    | 1:A:170:SER:HB3  | 2.49                     | 0.47              |
| 2:B:250:ALA:HB1    | 11:X:506:SQB:C5  | 2.45                     | 0.47              |
| 2:B:258:ASN:HB3    | 11:X:506:SQB:C11 | 2.43                     | 0.47              |
| 3:C:192:HIS:CG     | 3:C:421:ALA:HA   | 2.50                     | 0.47              |
| 3:C:343:PHE:HB2    | 3:C:349:THR:HG22 | 1.95                     | 0.47              |
| 4:D:218:LYS:C      | 4:D:219:LEU:HD23 | 2.34                     | 0.47              |

*Continued on next page...*

*Continued from previous page...*

| Atom-1           | Atom-2             | Interatomic distance (Å) | Clash overlap (Å) |
|------------------|--------------------|--------------------------|-------------------|
| 6:F:238:CYS:SG   | 6:F:239:HIS:CD2    | 3.08                     | 0.47              |
| 1:A:357:TYR:OH   | 5:E:18:GLN:NE2     | 2.47                     | 0.47              |
| 2:B:133:GLN:OE1  | 2:B:251:ASP:HB2    | 2.14                     | 0.47              |
| 2:B:221:THR:O    | 2:B:221:THR:CG2    | 2.61                     | 0.47              |
| 2:B:286:LEU:N    | 2:B:286:LEU:HD12   | 2.29                     | 0.47              |
| 1:A:187:SER:CB   | 1:A:391:LEU:HD21   | 2.45                     | 0.46              |
| 4:D:406:HIS:HA   | 4:D:409:THR:OG1    | 2.15                     | 0.46              |
| 1:A:177:VAL:HG11 | 1:A:224:TYR:HE1    | 1.80                     | 0.46              |
| 1:A:404:PHE:CD1  | 2:B:261:PRO:HA     | 2.50                     | 0.46              |
| 2:B:88:ARG:HH11  | 2:B:88:ARG:HG2     | 1.79                     | 0.46              |
| 4:D:165:ILE:HG21 | 4:D:252:LEU:HB3    | 1.97                     | 0.46              |
| 4:D:282:GLN:C    | 4:D:284:ARG:H      | 2.19                     | 0.46              |
| 3:C:177:VAL:HG11 | 3:C:224:TYR:CE1    | 2.51                     | 0.46              |
| 4:D:108:TYR:O    | 5:E:134:ARG:HD3    | 2.14                     | 0.46              |
| 4:D:185:TYR:OH   | 4:D:398:MET:HB3    | 2.15                     | 0.46              |
| 2:B:146:GLY:O    | 2:B:150:GLY:HA3    | 2.16                     | 0.46              |
| 3:C:66:VAL:HG12  | 3:C:68[A]:VAL:HG23 | 1.98                     | 0.46              |
| 1:A:154:MET:HG3  | 1:A:194:THR:HG23   | 1.98                     | 0.46              |
| 6:F:91:CYS:O     | 6:F:93:TRP:N       | 2.47                     | 0.46              |
| 2:B:339:ASN:HB3  | 2:B:342:TYR:HD2    | 1.81                     | 0.46              |
| 6:F:267:PHE:CD2  | 6:F:279:LEU:HD13   | 2.51                     | 0.46              |
| 1:A:40:LYS:HA    | 1:A:40:LYS:CE      | 2.43                     | 0.46              |
| 1:A:151:SER:HB2  | 1:A:193:THR:HG22   | 1.97                     | 0.46              |
| 1:A:158:SER:OG   | 1:A:166:LYS:HE3    | 2.16                     | 0.46              |
| 1:A:335:ILE:C    | 1:A:335:ILE:HD12   | 2.36                     | 0.46              |
| 1:A:285:GLN:HE21 | 1:A:373:ARG:NH1    | 2.13                     | 0.46              |
| 2:B:181:VAL:HG13 | 3:C:258:ASN:ND2    | 2.31                     | 0.46              |
| 2:B:318:ILE:O    | 2:B:318:ILE:HD12   | 2.16                     | 0.46              |
| 6:F:216:TYR:CE1  | 6:F:374:ILE:HD13   | 2.51                     | 0.46              |
| 2:B:305:CYS:O    | 2:B:307:PRO:HD3    | 2.15                     | 0.45              |
| 4:D:297:ASP:OD2  | 4:D:299:LYS:HB2    | 2.16                     | 0.45              |
| 4:D:387:LEU:HD23 | 4:D:387:LEU:C      | 2.36                     | 0.45              |
| 6:F:131:PHE:C    | 6:F:131:PHE:CD2    | 2.89                     | 0.45              |
| 6:F:189:PRO:HA   | 6:F:322:ASP:HA     | 1.98                     | 0.45              |
| 1:A:214:ARG:HG2  | 1:A:219:ILE:O      | 2.16                     | 0.45              |
| 1:A:117:LEU:HD11 | 1:A:121:ARG:HH11   | 1.81                     | 0.45              |
| 4:D:106:GLY:O    | 4:D:149:MET:HB2    | 2.17                     | 0.45              |
| 2:B:212:ILE:HG23 | 2:B:275:LEU:HD13   | 1.98                     | 0.45              |
| 4:D:180:THR:CG2  | 4:D:181:VAL:N      | 2.79                     | 0.45              |
| 1:A:411:GLU:OE1  | 1:A:411:GLU:HA     | 2.17                     | 0.45              |
| 2:B:18:ALA:O     | 2:B:22[A]:GLU:HG3  | 2.17                     | 0.45              |

*Continued on next page...*

Continued from previous page...

| Atom-1             | Atom-2            | Interatomic distance (Å) | Clash overlap (Å) |
|--------------------|-------------------|--------------------------|-------------------|
| 3:C:76:ASP:O       | 3:C:80:THR:HG23   | 2.16                     | 0.45              |
| 3:C:344:VAL:HG21   | 3:C:346:TRP:CE2   | 2.52                     | 0.45              |
| 4:D:141:LEU:HD12   | 4:D:172:MET:SD    | 2.56                     | 0.45              |
| 4:D:401:ARG:O      | 4:D:401:ARG:HG3   | 2.15                     | 0.45              |
| 2:B:171:VAL:HA     | 2:B:204:ILE:O     | 2.17                     | 0.45              |
| 3:C:69:ASP:O       | 3:C:94:THR:HA     | 2.17                     | 0.45              |
| 3:C:282:TYR:O      | 3:C:283:HIS:HB2   | 2.17                     | 0.45              |
| 4:D:357:ASP:O      | 4:D:359:PRO:HD3   | 2.17                     | 0.45              |
| 4:D:48:ARG:NH1     | 4:D:244:PHE:O     | 2.50                     | 0.45              |
| 5:E:9:ILE:HG12     | 5:E:21:GLU:HB3    | 1.99                     | 0.45              |
| 1:A:5:ILE:HD12     | 1:A:132:LEU:HD11  | 1.99                     | 0.44              |
| 1:A:21:TRP:CE3     | 1:A:63:PRO:HB3    | 2.51                     | 0.44              |
| 3:C:2:ARG:HA       | 3:C:131:GLY:O     | 2.17                     | 0.44              |
| 6:F:151:SER:HB2    | 6:F:180:HIS:CD2   | 2.52                     | 0.44              |
| 4:D:181:VAL:HG22   | 4:D:398:MET:HE1   | 2.00                     | 0.44              |
| 4:D:282:GLN:C      | 4:D:284:ARG:N     | 2.70                     | 0.44              |
| 6:F:18:SER:HA      | 6:F:21:LEU:HD12   | 1.99                     | 0.44              |
| 2:B:358:ILE:HD13   | 2:B:358:ILE:N     | 2.32                     | 0.44              |
| 2:B:303:ALA:O      | 2:B:305:CYS:N     | 2.50                     | 0.44              |
| 2:B:414[A]:ASP:OD1 | 2:B:416:MET:HB2   | 2.18                     | 0.44              |
| 1:A:3:GLU:O        | 1:A:133:GLN:HG3   | 2.17                     | 0.44              |
| 1:A:114:ILE:HD12   | 1:A:114:ILE:O     | 2.18                     | 0.44              |
| 1:A:312:TYR:O      | 1:A:344:VAL:HG13  | 2.16                     | 0.44              |
| 1:A:332:ILE:HD13   | 5:E:22:VAL:HG11   | 2.00                     | 0.44              |
| 2:B:278:ARG:H      | 2:B:278:ARG:HG2   | 1.52                     | 0.44              |
| 4:D:292:THR:CG2    | 4:D:335:VAL:HG21  | 2.44                     | 0.44              |
| 4:D:3:GLU:O        | 4:D:133:GLN:HB3   | 2.17                     | 0.44              |
| 1:A:188:ILE:HG13   | 1:A:425:MET:HG3   | 2.00                     | 0.44              |
| 6:F:299:GLU:N      | 6:F:300:PRO:HD2   | 2.33                     | 0.44              |
| 2:B:88:ARG:HG2     | 2:B:88:ARG:NH1    | 2.33                     | 0.43              |
| 2:B:396:THR:O      | 2:B:400:ARG:HB2   | 2.18                     | 0.43              |
| 3:C:115:ILE:HG23   | 3:C:116:ASP:N     | 2.33                     | 0.43              |
| 3:C:177:VAL:HG12   | 7:X:507:GTP:O2'   | 2.18                     | 0.43              |
| 6:F:340:GLN:OE1    | 6:F:340:GLN:HA    | 2.17                     | 0.43              |
| 1:A:262:TYR:CE1    | 1:A:346:TRP:CH2   | 3.06                     | 0.43              |
| 6:F:331:GLU:CD     | 12:X:511:ACP:H3B1 | 2.39                     | 0.43              |
| 2:B:400:ARG:HA     | 2:B:400:ARG:NE    | 2.34                     | 0.43              |
| 4:D:56:ALA:HB2     | 4:D:62:VAL:HG23   | 2.01                     | 0.43              |
| 6:F:81:ILE:O       | 6:F:87:LEU:O      | 2.35                     | 0.43              |
| 3:C:204:VAL:HG11   | 3:C:231:ILE:HG12  | 2.00                     | 0.43              |
| 5:E:14:CYS:SG      | 5:E:15:THR:N      | 2.91                     | 0.43              |

Continued on next page...

*Continued from previous page...*

| Atom-1             | Atom-2            | Interatomic distance (Å) | Clash overlap (Å) |
|--------------------|-------------------|--------------------------|-------------------|
| 1:A:329:ASN:OD1    | 1:A:329:ASN:N     | 2.51                     | 0.43              |
| 4:D:1:MET:O        | 4:D:131:CYS:HB3   | 2.18                     | 0.43              |
| 2:B:136:GLN:HA     | 2:B:167:ASN:O     | 2.19                     | 0.43              |
| 4:D:118:VAL:O      | 4:D:122:VAL:HG23  | 2.19                     | 0.43              |
| 3:C:90:GLU:CD      | 3:C:90:GLU:H      | 2.23                     | 0.43              |
| 4:D:269[B]:MET:HE3 | 4:D:305:CYS:HB2   | 2.01                     | 0.43              |
| 4:D:295:MET:HG2    | 4:D:377:PHE:HB2   | 2.01                     | 0.43              |
| 5:E:6:MET:HE3      | 5:E:22:VAL:HG21   | 2.01                     | 0.43              |
| 5:E:130:ALA:C      | 5:E:134:ARG:HH21  | 2.22                     | 0.43              |
| 3:C:119:LEU:HD11   | 3:C:156:ARG:CB    | 2.47                     | 0.42              |
| 4:D:28:HIS:HA      | 4:D:45:GLN:HB3    | 2.00                     | 0.42              |
| 6:F:226:GLU:HB2    | 6:F:238:CYS:HB3   | 2.00                     | 0.42              |
| 1:A:2:ARG:HB2      | 1:A:133:GLN:HG2   | 2.01                     | 0.42              |
| 1:A:262:TYR:HE1    | 1:A:346:TRP:CH2   | 2.38                     | 0.42              |
| 5:E:9:ILE:HG13     | 5:E:10:GLU:HG3    | 2.00                     | 0.42              |
| 1:A:70:LEU:CD2     | 1:A:145:THR:HG23  | 2.49                     | 0.42              |
| 1:A:153:LEU:HD12   | 1:A:153:LEU:O     | 2.19                     | 0.42              |
| 1:A:192:HIS:CG     | 1:A:421:ALA:HA    | 2.54                     | 0.42              |
| 1:A:242:LEU:HD12   | 1:A:242:LEU:HA    | 1.89                     | 0.42              |
| 2:B:113:GLU:H      | 2:B:113:GLU:HG2   | 1.47                     | 0.42              |
| 2:B:288:VAL:N      | 2:B:289:PRO:CD    | 2.82                     | 0.42              |
| 6:F:100:ILE:CD1    | 6:F:173:ILE:HD13  | 2.47                     | 0.42              |
| 1:A:22:GLU:HG3     | 1:A:83:TYR:CE1    | 2.55                     | 0.42              |
| 1:A:347:CYS:C      | 5:E:27:PRO:HB3    | 2.40                     | 0.42              |
| 4:D:34:GLY:HA2     | 4:D:86:ILE:HD11   | 2.01                     | 0.42              |
| 4:D:208:ALA:O      | 4:D:212:ILE:HG13  | 2.19                     | 0.42              |
| 6:F:102:PRO:HA     | 6:F:173:ILE:HG22  | 2.00                     | 0.42              |
| 1:A:255:PHE:O      | 1:A:259:LEU:HB2   | 2.19                     | 0.42              |
| 2:B:68:VAL:HA      | 2:B:93:VAL:O      | 2.19                     | 0.42              |
| 4:D:48:ARG:HG3     | 4:D:48:ARG:HH11   | 1.84                     | 0.42              |
| 4:D:187:ALA:O      | 4:D:191:VAL:HG23  | 2.19                     | 0.42              |
| 6:F:349:GLY:O      | 6:F:353:VAL:HG13  | 2.19                     | 0.42              |
| 1:A:141:PHE:O      | 1:A:147:SER:HB3   | 2.19                     | 0.42              |
| 5:E:76:ARG:NH1     | 5:E:76:ARG:HG2    | 2.35                     | 0.42              |
| 1:A:7:ILE:HG23     | 1:A:66[B]:VAL:CG1 | 2.50                     | 0.42              |
| 1:A:7:ILE:HD13     | 1:A:122:ILE:HD11  | 2.02                     | 0.42              |
| 1:A:75:ILE:HD12    | 1:A:94:THR:HG22   | 2.01                     | 0.42              |
| 1:A:313:MET:HG2    | 1:A:346:TRP:CH2   | 2.55                     | 0.42              |
| 2:B:345:GLU:OE2    | 2:B:345:GLU:N     | 2.48                     | 0.42              |
| 5:E:6:MET:HE3      | 5:E:6:MET:HB3     | 1.84                     | 0.42              |
| 2:B:123:ARG:O      | 2:B:124:LYS:C     | 2.58                     | 0.41              |

*Continued on next page...*

*Continued from previous page...*

| Atom-1           | Atom-2             | Interatomic distance (Å) | Clash overlap (Å) |
|------------------|--------------------|--------------------------|-------------------|
| 1:A:31:GLN:HB3   | 1:A:32:PRO:CD      | 2.48                     | 0.41              |
| 2:B:268:PHE:HB3  | 2:B:378:ILE:HG22   | 2.01                     | 0.41              |
| 3:C:306:ASP:OD1  | 3:C:308:ARG:HG2    | 2.20                     | 0.41              |
| 6:F:37:PHE:CE1   | 6:F:40:MET:HB2     | 2.55                     | 0.41              |
| 3:C:101:ASN:HD21 | 4:D:254:LYS:HE2    | 1.84                     | 0.41              |
| 4:D:48:ARG:NH1   | 4:D:48:ARG:HG3     | 2.35                     | 0.41              |
| 4:D:202:TYR:CZ   | 4:D:238:VAL:CG1    | 3.03                     | 0.41              |
| 2:B:231:VAL:O    | 2:B:235:MET:HG3    | 2.20                     | 0.41              |
| 3:C:343:PHE:CB   | 3:C:349:THR:HG22   | 2.51                     | 0.41              |
| 6:F:216:TYR:CD2  | 6:F:346:LEU:HD13   | 2.55                     | 0.41              |
| 1:A:43:GLY:HA2   | 1:A:55:GLU:HB3     | 2.02                     | 0.41              |
| 1:A:76:ASP:O     | 1:A:80[A]:THR:HG22 | 2.20                     | 0.41              |
| 4:D:2:ARG:NE     | 4:D:2:ARG:HA       | 2.36                     | 0.41              |
| 4:D:40:SER:O     | 4:D:45:GLN:HG3     | 2.20                     | 0.41              |
| 4:D:54:ASN:OD1   | 4:D:64:ARG:NE      | 2.53                     | 0.41              |
| 6:F:88:SER:C     | 6:F:90:SER:N       | 2.72                     | 0.41              |
| 2:B:312:TYR:CD1  | 2:B:381:SER:HB2    | 2.55                     | 0.41              |
| 3:C:96:LYS:HB2   | 3:C:96:LYS:HZ3     | 1.86                     | 0.41              |
| 6:F:280:GLU:HA   | 6:F:284[B]:LEU:HB2 | 2.03                     | 0.41              |
| 4:D:282:GLN:HB2  | 4:D:283:TYR:H      | 1.58                     | 0.41              |
| 1:A:119:LEU:HD12 | 1:A:156:ARG:NH2    | 2.35                     | 0.41              |
| 3:C:177:VAL:O    | 3:C:177:VAL:CG1    | 2.69                     | 0.41              |
| 6:F:242:ASN:ND2  | 12:X:511:ACP:O2B   | 2.51                     | 0.41              |
| 5:E:90:ASN:O     | 5:E:94:ILE:HG13    | 2.21                     | 0.41              |
| 3:C:46:ASP:OD1   | 3:C:46:ASP:N       | 2.53                     | 0.41              |
| 4:D:156:LYS:HD3  | 4:D:156:LYS:HA     | 1.90                     | 0.41              |
| 4:D:419:THR:HA   | 4:D:422:GLU:HB3    | 2.03                     | 0.41              |
| 6:F:73:ARG:HB2   | 6:F:76[B]:SER:OG   | 2.21                     | 0.41              |
| 1:A:47:ASP:O     | 1:A:50:ASN:HB2     | 2.21                     | 0.40              |
| 4:D:282:GLN:O    | 4:D:284:ARG:N      | 2.54                     | 0.40              |
| 1:A:10:GLY:O     | 1:A:14:VAL:HG23    | 2.21                     | 0.40              |
| 1:A:21:TRP:CH2   | 1:A:63:PRO:HB3     | 2.56                     | 0.40              |
| 2:B:145:THR:O    | 2:B:149:MET:HB3    | 2.21                     | 0.40              |
| 2:B:320:ARG:O    | 2:B:373:MET:HA     | 2.21                     | 0.40              |
| 2:B:56:ALA:HB3   | 2:B:60:LYS:HD3     | 2.03                     | 0.40              |
| 2:B:192:HIS:CE1  | 2:B:424[A]:ASN:OD1 | 2.75                     | 0.40              |
| 3:C:335:ILE:HG22 | 3:C:341:ILE:HD11   | 2.04                     | 0.40              |
| 4:D:412:GLY:O    | 5:E:136:ASN:ND2    | 2.50                     | 0.40              |
| 6:F:149:ALA:CB   | 6:F:182:ILE:HG12   | 2.51                     | 0.40              |
| 3:C:195:LEU:HD12 | 3:C:195:LEU:HA     | 1.78                     | 0.40              |
| 4:D:86:ILE:HD12  | 4:D:86:ILE:HA      | 1.81                     | 0.40              |

*Continued on next page...*

Continued from previous page...

| Atom-1          | Atom-2           | Interatomic distance (Å) | Clash overlap (Å) |
|-----------------|------------------|--------------------------|-------------------|
| 4:D:113:GLU:OE2 | 4:D:113:GLU:CA   | 2.68                     | 0.40              |
| 4:D:115:VAL:O   | 4:D:119:LEU:HG   | 2.21                     | 0.40              |
| 4:D:136:GLN:O   | 4:D:136:GLN:HG3  | 2.21                     | 0.40              |
| 6:F:147:TRP:HB2 | 6:F:169:LEU:HD11 | 2.03                     | 0.40              |
| 4:D:32:PRO:HA   | 4:D:83:PHE:CD1   | 2.56                     | 0.40              |

There are no symmetry-related clashes.

### 5.3 Torsion angles [i](#)

#### 5.3.1 Protein backbone [i](#)

In the following table, the Percentiles column shows the percent Ramachandran outliers of the chain as a percentile score with respect to all X-ray entries followed by that with respect to entries of similar resolution.

The Analysed column shows the number of residues for which the backbone conformation was analysed, and the total number of residues.

| Mol | Chain | Analysed         | Favoured   | Allowed | Outliers | Percentiles |
|-----|-------|------------------|------------|---------|----------|-------------|
| 1   | A     | 447/439 (102%)   | 439 (98%)  | 8 (2%)  | 0        | 100 100     |
| 2   | B     | 437/428 (102%)   | 421 (96%)  | 13 (3%) | 3 (1%)   | 22 46       |
| 3   | C     | 448/440 (102%)   | 433 (97%)  | 14 (3%) | 1 (0%)   | 47 73       |
| 4   | D     | 433/431 (100%)   | 403 (93%)  | 28 (6%) | 2 (0%)   | 29 54       |
| 5   | E     | 119/121 (98%)    | 117 (98%)  | 2 (2%)  | 0        | 100 100     |
| 6   | F     | 309/320 (97%)    | 294 (95%)  | 14 (4%) | 1 (0%)   | 41 66       |
| All | All   | 2193/2179 (101%) | 2107 (96%) | 79 (4%) | 7 (0%)   | 41 66       |

All (7) Ramachandran outliers are listed below:

| Mol | Chain | Res | Type |
|-----|-------|-----|------|
| 3   | C     | 283 | HIS  |
| 4   | D     | 276 | THR  |
| 2   | B     | 278 | ARG  |
| 2   | B     | 281 | GLN  |
| 2   | B     | 304 | ALA  |
| 4   | D     | 282 | GLN  |
| 6   | F     | 92  | THR  |

### 5.3.2 Protein sidechains [i](#)

In the following table, the Percentiles column shows the percent sidechain outliers of the chain as a percentile score with respect to all X-ray entries followed by that with respect to entries of similar resolution.

The Analysed column shows the number of residues for which the sidechain conformation was analysed, and the total number of residues.

| Mol | Chain | Analysed         | Rotameric  | Outliers | Percentiles |    |
|-----|-------|------------------|------------|----------|-------------|----|
| 1   | A     | 380/370 (103%)   | 365 (96%)  | 15 (4%)  | 32          | 61 |
| 2   | B     | 380/370 (103%)   | 360 (95%)  | 20 (5%)  | 22          | 48 |
| 3   | C     | 381/371 (103%)   | 368 (97%)  | 13 (3%)  | 37          | 66 |
| 4   | D     | 376/372 (101%)   | 354 (94%)  | 22 (6%)  | 19          | 43 |
| 5   | E     | 111/109 (102%)   | 109 (98%)  | 2 (2%)   | 59          | 83 |
| 6   | F     | 293/289 (101%)   | 275 (94%)  | 18 (6%)  | 18          | 41 |
| All | All   | 1921/1881 (102%) | 1831 (95%) | 90 (5%)  | 26          | 54 |

All (90) residues with a non-rotameric sidechain are listed below:

| Mol | Chain | Res | Type |
|-----|-------|-----|------|
| 1   | A     | 1   | MET  |
| 1   | A     | 46  | ASP  |
| 1   | A     | 71  | GLU  |
| 1   | A     | 120 | ASP  |
| 1   | A     | 181 | VAL  |
| 1   | A     | 242 | LEU  |
| 1   | A     | 250 | VAL  |
| 1   | A     | 257 | THR  |
| 1   | A     | 284 | GLU  |
| 1   | A     | 285 | GLN  |
| 1   | A     | 302 | MET  |
| 1   | A     | 329 | ASN  |
| 1   | A     | 368 | LEU  |
| 1   | A     | 390 | ARG  |
| 1   | A     | 413 | MET  |
| 2   | B     | 55  | GLU  |
| 2   | B     | 60  | LYS  |
| 2   | B     | 79  | ARG  |
| 2   | B     | 80  | SER  |
| 2   | B     | 90  | ASP  |
| 2   | B     | 124 | LYS  |
| 2   | B     | 139 | HIS  |

*Continued on next page...*

Continued from previous page...

| Mol | Chain | Res    | Type |
|-----|-------|--------|------|
| 2   | B     | 147[A] | SER  |
| 2   | B     | 147[B] | SER  |
| 2   | B     | 155    | SER  |
| 2   | B     | 207    | GLU  |
| 2   | B     | 260    | VAL  |
| 2   | B     | 278    | ARG  |
| 2   | B     | 281    | GLN  |
| 2   | B     | 353    | THR  |
| 2   | B     | 355    | VAL  |
| 2   | B     | 357    | ASP  |
| 2   | B     | 377    | PHE  |
| 2   | B     | 387    | LEU  |
| 2   | B     | 400    | ARG  |
| 3   | C     | 18     | ASN  |
| 3   | C     | 71     | GLU  |
| 3   | C     | 124    | LYS  |
| 3   | C     | 164    | LYS  |
| 3   | C     | 170    | SER  |
| 3   | C     | 178    | SER  |
| 3   | C     | 195    | LEU  |
| 3   | C     | 221    | ARG  |
| 3   | C     | 285    | GLN  |
| 3   | C     | 338    | LYS  |
| 3   | C     | 342    | GLN  |
| 3   | C     | 347    | CYS  |
| 3   | C     | 430    | LYS  |
| 4   | D     | 50     | ASN  |
| 4   | D     | 59     | ASN  |
| 4   | D     | 68     | VAL  |
| 4   | D     | 70     | LEU  |
| 4   | D     | 71     | GLU  |
| 4   | D     | 76     | ASP  |
| 4   | D     | 94     | PHE  |
| 4   | D     | 139    | HIS  |
| 4   | D     | 172    | MET  |
| 4   | D     | 247    | GLN  |
| 4   | D     | 248    | LEU  |
| 4   | D     | 278    | ARG  |
| 4   | D     | 282    | GLN  |
| 4   | D     | 283    | TYR  |
| 4   | D     | 284    | ARG  |
| 4   | D     | 286    | LEU  |

Continued on next page...

*Continued from previous page...*

| Mol | Chain | Res    | Type |
|-----|-------|--------|------|
| 4   | D     | 298    | SER  |
| 4   | D     | 302    | MET  |
| 4   | D     | 323    | MET  |
| 4   | D     | 345    | GLU  |
| 4   | D     | 377    | PHE  |
| 4   | D     | 414    | ASP  |
| 5   | E     | 14     | CYS  |
| 5   | E     | 103    | GLN  |
| 6   | F     | 19     | ARG  |
| 6   | F     | 33     | ASP  |
| 6   | F     | 89     | GLU  |
| 6   | F     | 90     | SER  |
| 6   | F     | 91     | CYS  |
| 6   | F     | 131    | PHE  |
| 6   | F     | 162    | ILE  |
| 6   | F     | 192    | LEU  |
| 6   | F     | 196    | HIS  |
| 6   | F     | 197    | ARG  |
| 6   | F     | 211    | TYR  |
| 6   | F     | 240    | LEU  |
| 6   | F     | 272    | MET  |
| 6   | F     | 284[A] | LEU  |
| 6   | F     | 284[B] | LEU  |
| 6   | F     | 296    | MET  |
| 6   | F     | 311    | SER  |
| 6   | F     | 353    | VAL  |

Sometimes sidechains can be flipped to improve hydrogen bonding and reduce clashes. All (10) such sidechains are listed below:

| Mol | Chain | Res | Type |
|-----|-------|-----|------|
| 1   | A     | 61  | HIS  |
| 1   | A     | 283 | HIS  |
| 1   | A     | 285 | GLN  |
| 2   | B     | 136 | GLN  |
| 2   | B     | 385 | GLN  |
| 2   | B     | 433 | GLN  |
| 4   | D     | 133 | GLN  |
| 4   | D     | 281 | GLN  |
| 4   | D     | 300 | ASN  |
| 6   | F     | 239 | HIS  |

### 5.3.3 RNA [i](#)

There are no RNA molecules in this entry.

### 5.4 Non-standard residues in protein, DNA, RNA chains [i](#)

There are no non-standard protein/DNA/RNA residues in this entry.

### 5.5 Carbohydrates [i](#)

There are no monosaccharides in this entry.

### 5.6 Ligand geometry [i](#)

Of 12 ligands modelled in this entry, 6 are monoatomic and 1 could not be matched to an existing wwPDB Chemical Component Dictionary definition at this stage - leaving 5 for Mogul analysis.

In the following table, the Counts columns list the number of bonds (or angles) for which Mogul statistics could be retrieved, the number of bonds (or angles) that are observed in the model and the number of bonds (or angles) that are defined in the Chemical Component Dictionary. The Link column lists molecule types, if any, to which the group is linked. The Z score for a bond length (or angle) is the number of standard deviations the observed value is removed from the expected value. A bond length (or angle) with  $|Z| > 2$  is considered an outlier worth inspection. RMSZ is the root-mean-square of all Z scores of the bond lengths (or angles).

| Mol | Type | Chain | Res | Link | Bond lengths |      |          | Bond angles |      |          |
|-----|------|-------|-----|------|--------------|------|----------|-------------|------|----------|
|     |      |       |     |      | Counts       | RMSZ | # Z  > 2 | Counts      | RMSZ | # Z  > 2 |
| 7   | GTP  | X     | 507 | -    | 26,34,34     | 1.01 | 2 (7%)   | 32,54,54    | 0.69 | 1 (3%)   |
| 10  | GDP  | X     | 509 | 8    | 24,30,30     | 0.98 | 3 (12%)  | 30,47,47    | 0.67 | 1 (3%)   |
| 12  | ACP  | X     | 511 | -    | 27,33,33     | 0.92 | 1 (3%)   | 32,52,52    | 0.85 | 2 (6%)   |
| 10  | GDP  | X     | 504 | 8    | 24,30,30     | 1.00 | 2 (8%)   | 30,47,47    | 0.65 | 1 (3%)   |
| 7   | GTP  | X     | 501 | 8    | 26,34,34     | 1.00 | 2 (7%)   | 32,54,54    | 0.69 | 1 (3%)   |

In the following table, the Chirals column lists the number of chiral outliers, the number of chiral centers analysed, the number of these observed in the model and the number defined in the Chemical Component Dictionary. Similar counts are reported in the Torsion and Rings columns. '-' means no outliers of that kind were identified.

| Mol | Type | Chain | Res | Link | Chirals | Torsions   | Rings   |
|-----|------|-------|-----|------|---------|------------|---------|
| 7   | GTP  | X     | 507 | -    | -       | 5/18/38/38 | 0/3/3/3 |
| 10  | GDP  | X     | 509 | 8    | -       | 5/12/32/32 | 0/3/3/3 |

Continued on next page...

Continued from previous page...

| Mol | Type | Chain | Res | Link | Chirals | Torsions   | Rings   |
|-----|------|-------|-----|------|---------|------------|---------|
| 12  | ACP  | X     | 511 | -    | -       | 8/15/38/38 | 0/3/3/3 |
| 10  | GDP  | X     | 504 | 8    | -       | 4/12/32/32 | 0/3/3/3 |
| 7   | GTP  | X     | 501 | 8    | -       | 4/18/38/38 | 0/3/3/3 |

All (10) bond length outliers are listed below:

| Mol | Chain | Res | Type | Atoms  | Z     | Observed(Å) | Ideal(Å) |
|-----|-------|-----|------|--------|-------|-------------|----------|
| 10  | X     | 504 | GDP  | C5-C6  | -2.73 | 1.41        | 1.47     |
| 10  | X     | 509 | GDP  | C5-C6  | -2.69 | 1.41        | 1.47     |
| 7   | X     | 507 | GTP  | C5-C6  | -2.69 | 1.42        | 1.47     |
| 7   | X     | 501 | GTP  | C5-C6  | -2.67 | 1.42        | 1.47     |
| 12  | X     | 511 | ACP  | PB-O2B | -2.51 | 1.50        | 1.56     |
| 7   | X     | 507 | GTP  | C8-N7  | -2.14 | 1.31        | 1.35     |
| 10  | X     | 509 | GDP  | C8-N7  | -2.09 | 1.31        | 1.35     |
| 10  | X     | 504 | GDP  | C8-N7  | -2.09 | 1.31        | 1.35     |
| 7   | X     | 501 | GTP  | C8-N7  | -2.09 | 1.31        | 1.35     |
| 10  | X     | 509 | GDP  | C5-C4  | -2.00 | 1.38        | 1.43     |

All (6) bond angle outliers are listed below:

| Mol | Chain | Res | Type | Atoms      | Z     | Observed(°) | Ideal(°) |
|-----|-------|-----|------|------------|-------|-------------|----------|
| 12  | X     | 511 | ACP  | O1G-PG-C3B | -2.33 | 106.22      | 111.24   |
| 12  | X     | 511 | ACP  | C5-C6-N6   | 2.28  | 123.82      | 120.35   |
| 7   | X     | 507 | GTP  | O6-C6-C5   | 2.07  | 128.41      | 124.37   |
| 7   | X     | 501 | GTP  | O6-C6-C5   | 2.04  | 128.37      | 124.37   |
| 10  | X     | 509 | GDP  | O6-C6-C5   | 2.04  | 128.35      | 124.37   |
| 10  | X     | 504 | GDP  | O6-C6-C5   | 2.03  | 128.34      | 124.37   |

There are no chirality outliers.

All (26) torsion outliers are listed below:

| Mol | Chain | Res | Type | Atoms           |
|-----|-------|-----|------|-----------------|
| 7   | X     | 501 | GTP  | C5'-O5'-PA-O1A  |
| 7   | X     | 507 | GTP  | C5'-O5'-PA-O1A  |
| 10  | X     | 504 | GDP  | C5'-O5'-PA-O1A  |
| 10  | X     | 509 | GDP  | C5'-O5'-PA-O1A  |
| 12  | X     | 511 | ACP  | PG-C3B-PB-O1B   |
| 12  | X     | 511 | ACP  | PG-C3B-PB-O2B   |
| 12  | X     | 511 | ACP  | PG-C3B-PB-O3A   |
| 12  | X     | 511 | ACP  | O4'-C4'-C5'-O5' |

Continued on next page...

Continued from previous page...

| Mol | Chain | Res | Type | Atoms           |
|-----|-------|-----|------|-----------------|
| 12  | X     | 511 | ACP  | C3'-C4'-C5'-O5' |
| 10  | X     | 509 | GDP  | PB-O3A-PA-O1A   |
| 7   | X     | 501 | GTP  | C5'-O5'-PA-O3A  |
| 10  | X     | 509 | GDP  | C5'-O5'-PA-O3A  |
| 7   | X     | 507 | GTP  | PB-O3A-PA-O2A   |
| 7   | X     | 501 | GTP  | C5'-O5'-PA-O2A  |
| 7   | X     | 507 | GTP  | C5'-O5'-PA-O2A  |
| 10  | X     | 504 | GDP  | C5'-O5'-PA-O2A  |
| 10  | X     | 509 | GDP  | C5'-O5'-PA-O2A  |
| 10  | X     | 504 | GDP  | PB-O3A-PA-O2A   |
| 10  | X     | 509 | GDP  | PB-O3A-PA-O2A   |
| 7   | X     | 507 | GTP  | C5'-O5'-PA-O3A  |
| 10  | X     | 504 | GDP  | C5'-O5'-PA-O3A  |
| 12  | X     | 511 | ACP  | C5'-O5'-PA-O3A  |
| 7   | X     | 501 | GTP  | PB-O3A-PA-O2A   |
| 7   | X     | 507 | GTP  | PB-O3A-PA-O1A   |
| 12  | X     | 511 | ACP  | C5'-O5'-PA-O1A  |
| 12  | X     | 511 | ACP  | C5'-O5'-PA-O2A  |

There are no ring outliers.

4 monomers are involved in 5 short contacts:

| Mol | Chain | Res | Type | Clashes | Symm-Clashes |
|-----|-------|-----|------|---------|--------------|
| 7   | X     | 507 | GTP  | 1       | 0            |
| 10  | X     | 509 | GDP  | 1       | 0            |
| 12  | X     | 511 | ACP  | 2       | 0            |
| 7   | X     | 501 | GTP  | 1       | 0            |

The following is a two-dimensional graphical depiction of Mogul quality analysis of bond lengths, bond angles, torsion angles, and ring geometry for all instances of the Ligand of Interest. In addition, ligands with molecular weight > 250 and outliers as shown on the validation Tables will also be included. For torsion angles, if less than 5% of the Mogul distribution of torsion angles is within 10 degrees of the torsion angle in question, then that torsion angle is considered an outlier. Any bond that is central to one or more torsion angles identified as an outlier by Mogul will be highlighted in the graph. For rings, the root-mean-square deviation (RMSD) between the ring in question and similar rings identified by Mogul is calculated over all ring torsion angles. If the average RMSD is greater than 60 degrees and the minimal RMSD between the ring in question and any Mogul-identified rings is also greater than 60 degrees, then that ring is considered an outlier. The outliers are highlighted in purple. The color gray indicates Mogul did not find sufficient equivalents in the CSD to analyse the geometry.

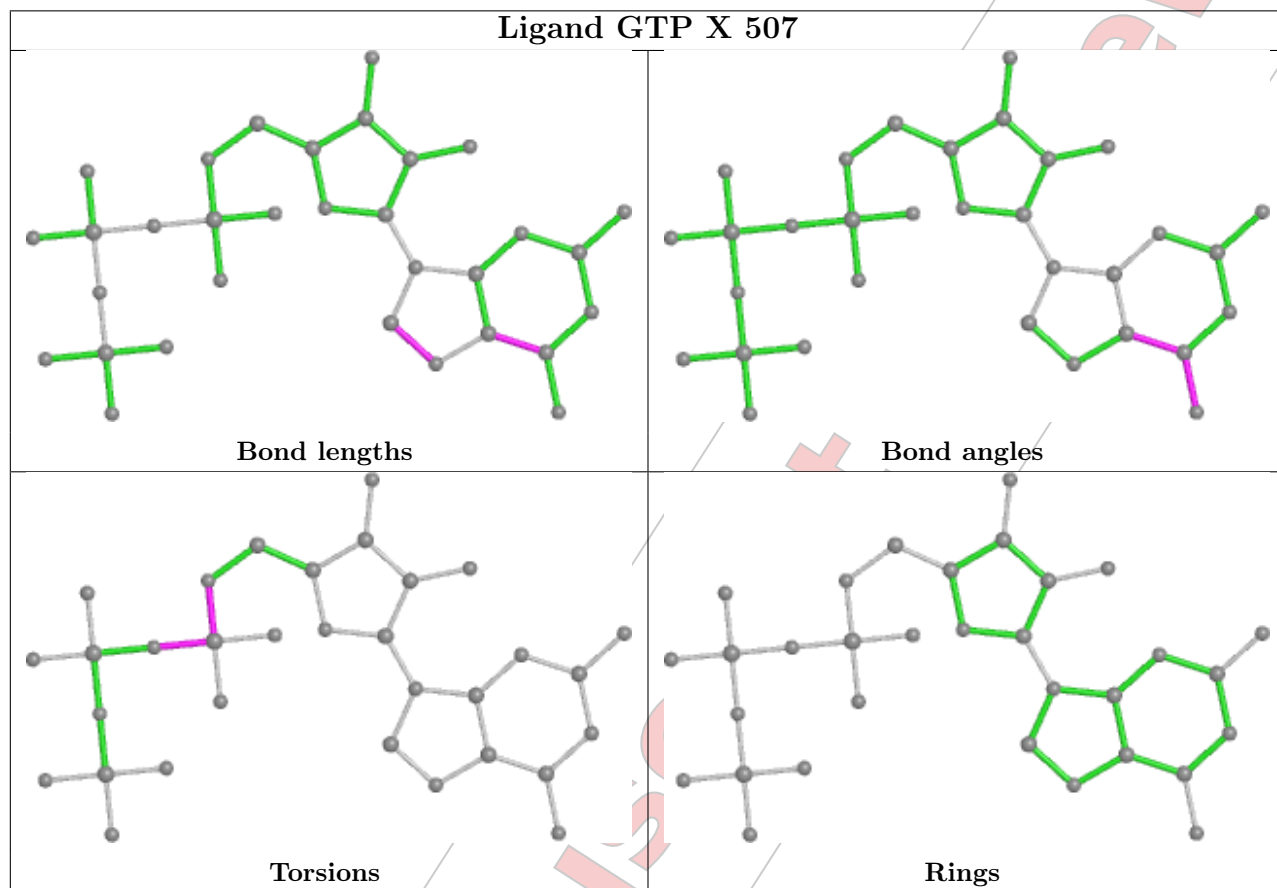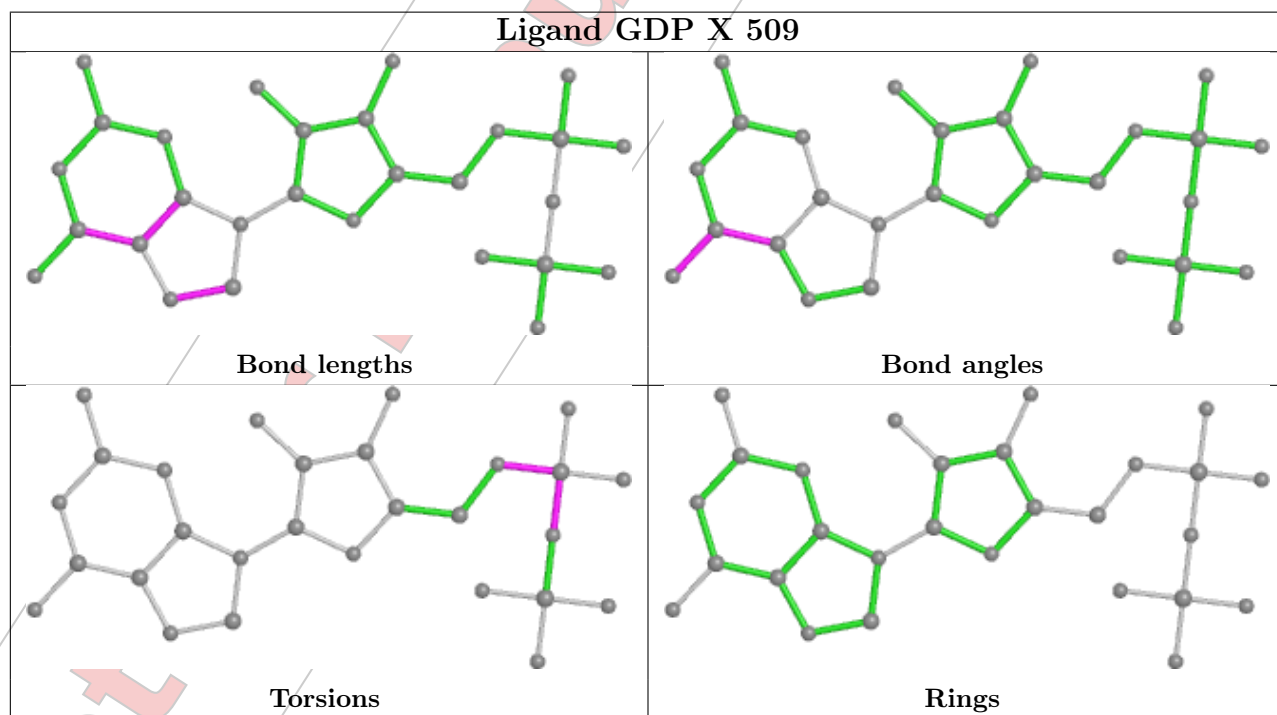

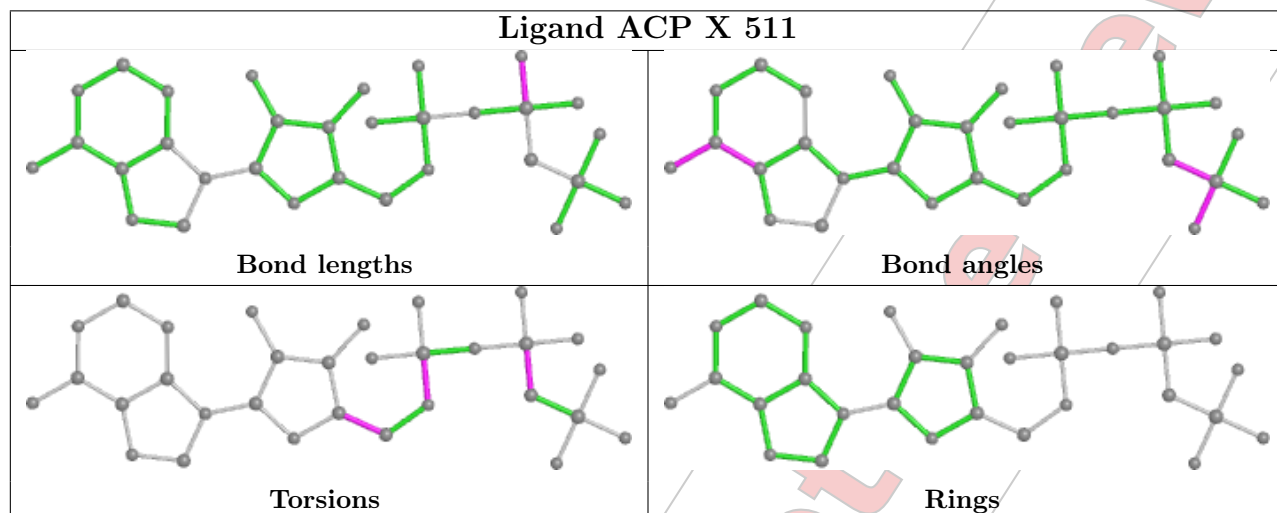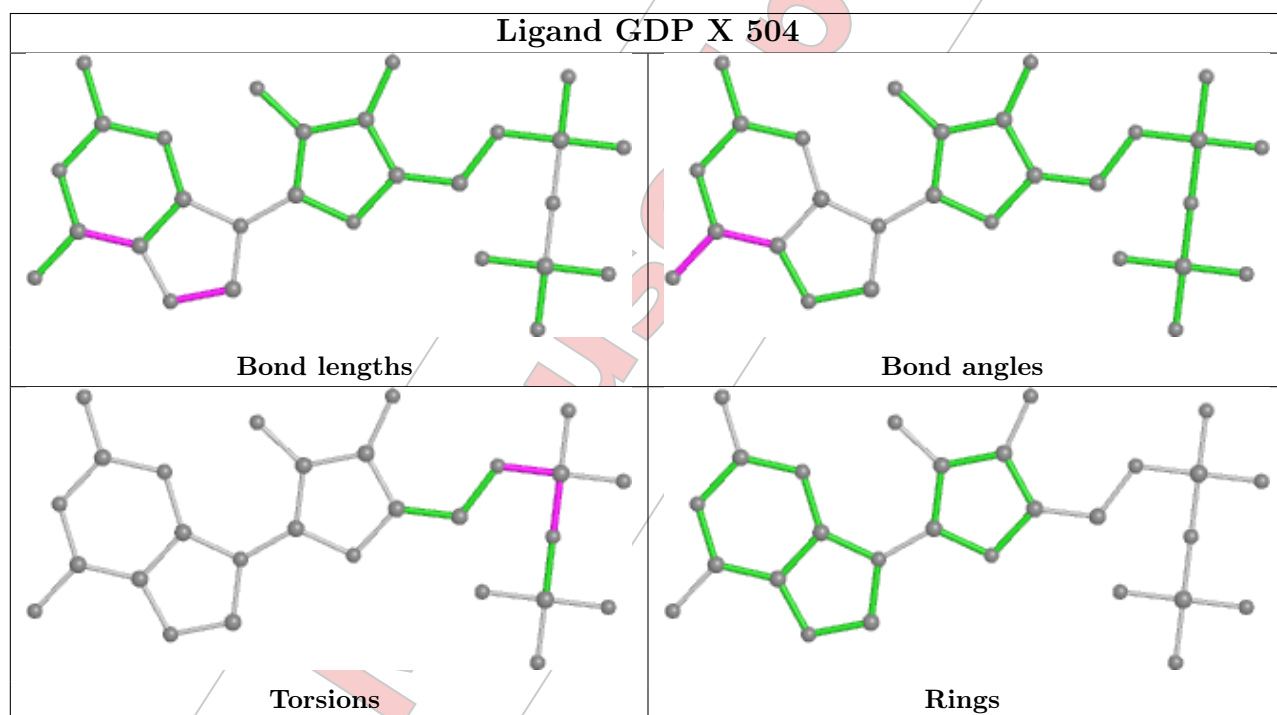

Not For

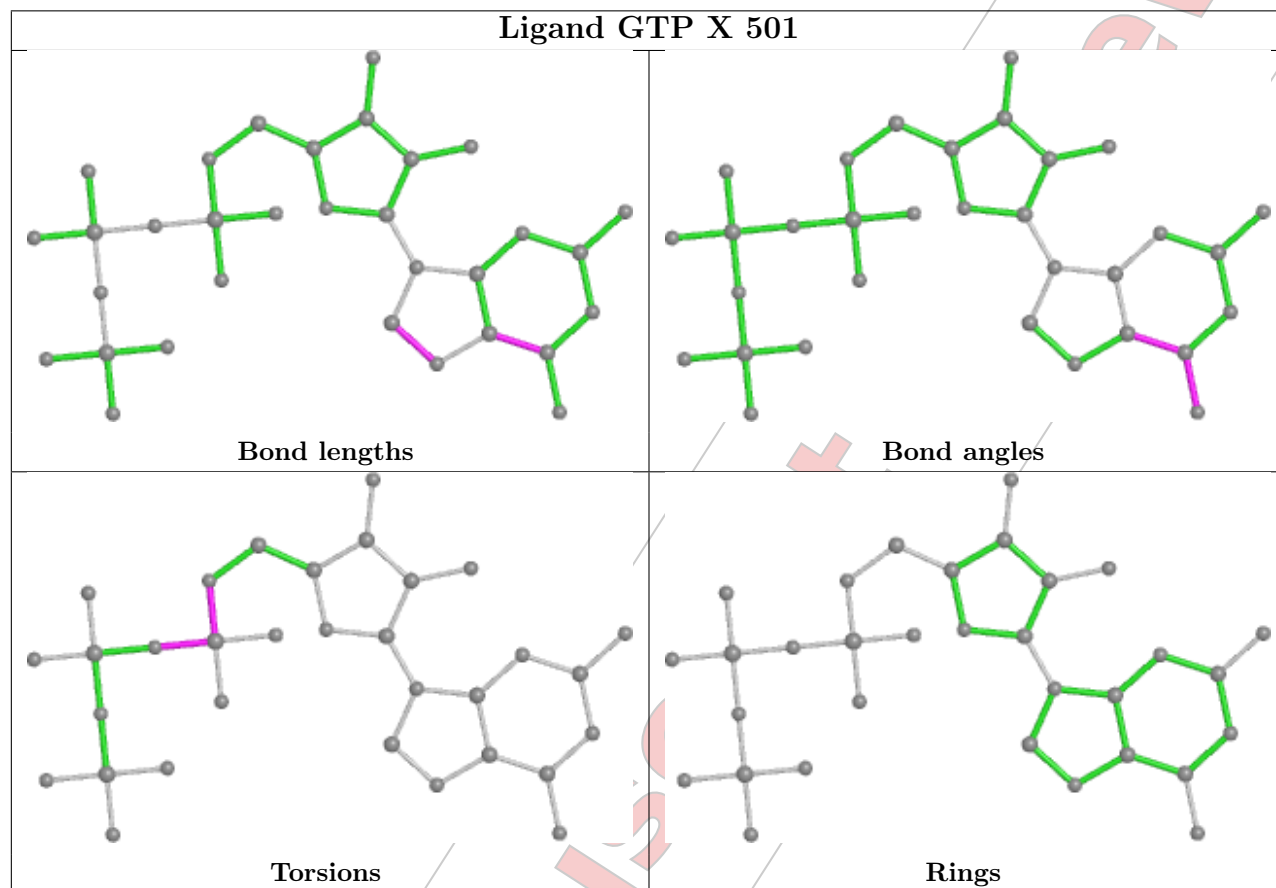

## 5.7 Other polymers [i](#)

There are no such residues in this entry.

## 5.8 Polymer linkage issues [i](#)

The following chains have linkage breaks:

| Mol | Chain | Number of breaks |
|-----|-------|------------------|
| 6   | F     | 6                |
| 5   | E     | 1                |

All chain breaks are listed below:

| Model | Chain | Residue-1 | Atom-1 | Residue-2 | Atom-2 | Distance (Å) |
|-------|-------|-----------|--------|-----------|--------|--------------|
| 1     | E     | 28:SER    | C      | 44:ASP    | N      | 31.51        |
| 1     | F     | 362:ALA   | C      | 373:SER   | N      | 19.14        |
| 1     | F     | 102:PRO   | C      | 125:THR   | N      | 12.94        |
| 1     | F     | 151:SER   | C      | 162:ILE   | N      | 12.03        |
| 1     | F     | 136:ASN   | C      | 144:GLY   | N      | 10.25        |

*Continued on next page...*

*Continued from previous page...*

| Model | Chain | Residue-1 | Atom-1 | Residue-2 | Atom-2 | Distance (Å) |
|-------|-------|-----------|--------|-----------|--------|--------------|
| 1     | F     | 173:ILE   | C      | 179:VAL   | N      | 8.39         |
| 1     | F     | 231:ALA   | C      | 235:ASP   | N      | 6.80         |

Not For Manuscript Review

## 6 Fit of model and data [i](#)

### 6.1 Protein, DNA and RNA chains [i](#)

Unable to reproduce the depositors R factor - this section is therefore empty.

### 6.2 Non-standard residues in protein, DNA, RNA chains [i](#)

Unable to reproduce the depositors R factor - this section is therefore empty.

### 6.3 Carbohydrates [i](#)

Unable to reproduce the depositors R factor - this section is therefore empty.

### 6.4 Ligands [i](#)

Unable to reproduce the depositors R factor - this section is therefore empty.

The following is a graphical depiction of the model fit to experimental electron density of all instances of the Ligand of Interest. In addition, ligands with molecular weight > 250 and outliers as shown on the geometry validation Tables will also be included. Each fit is shown from different orientation to approximate a three-dimensional view.

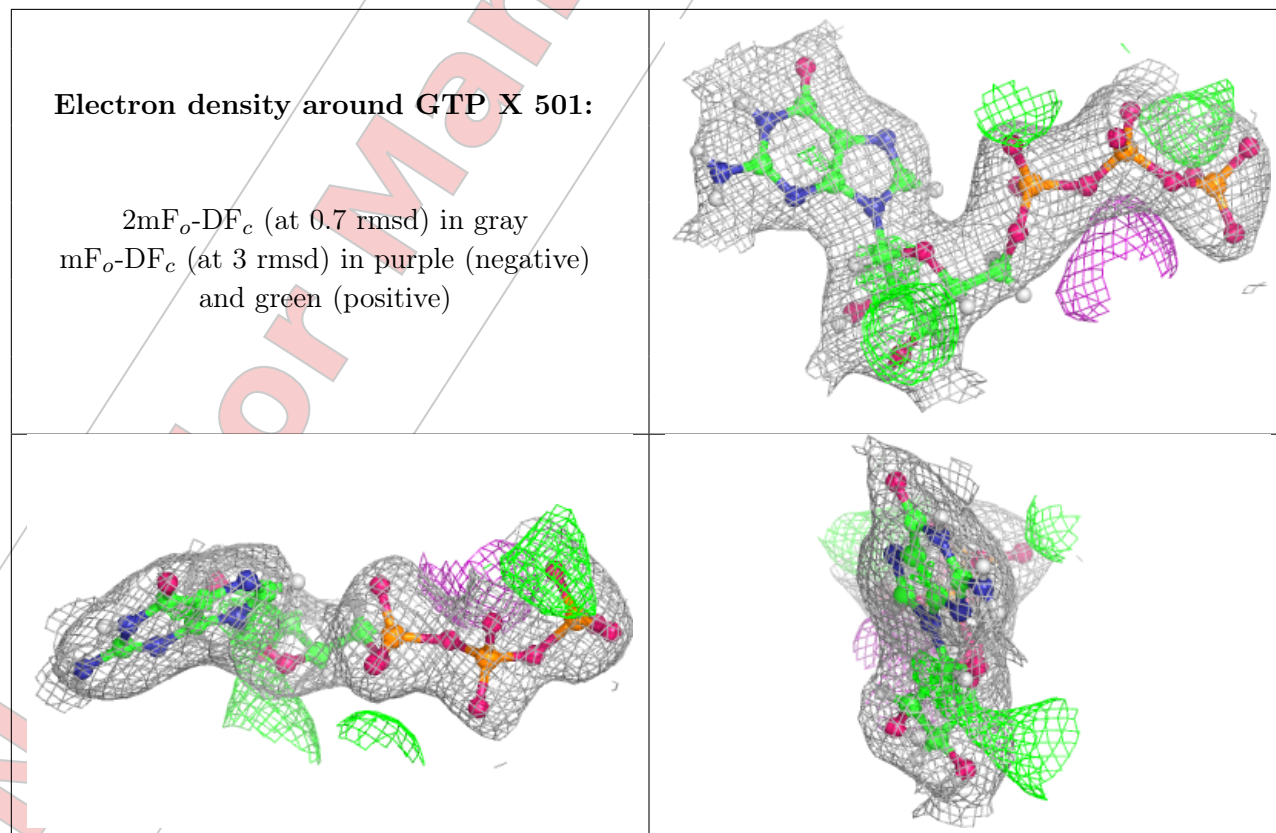

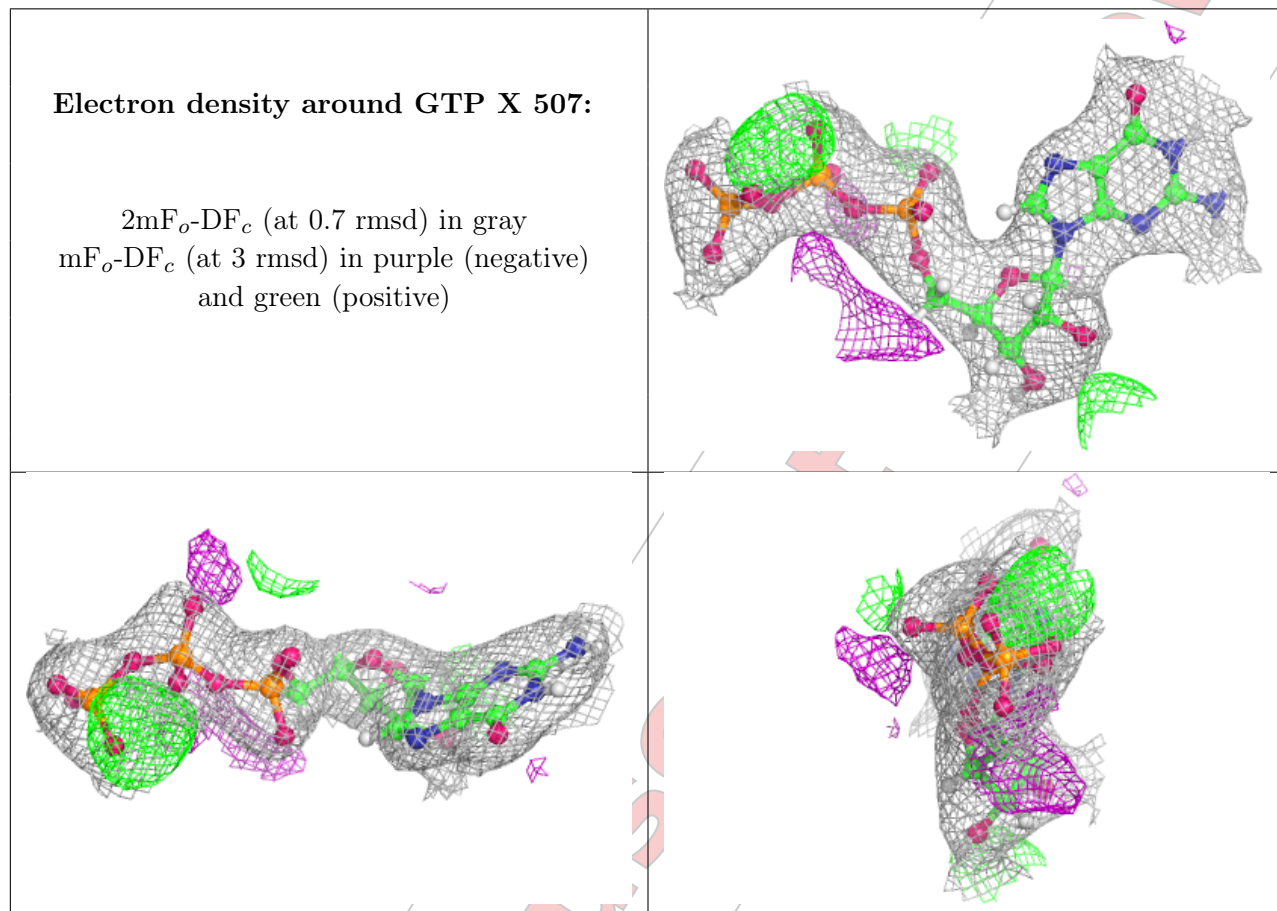

Not For Manuscript Review

**Electron density around GDP X 504:**

$2mF_o-DF_c$  (at 0.7 rmsd) in gray  
 $mF_o-DF_c$  (at 3 rmsd) in purple (negative)  
and green (positive)

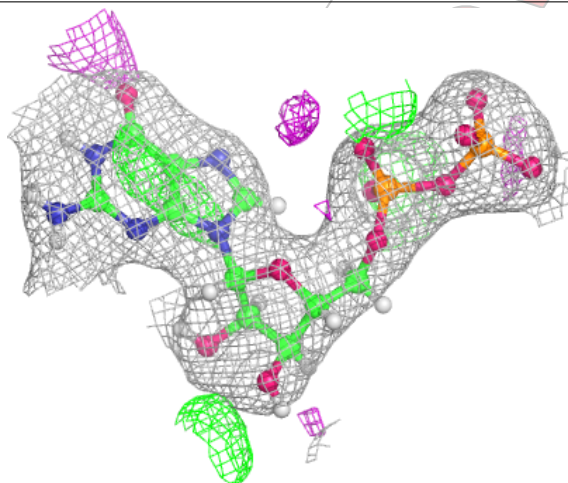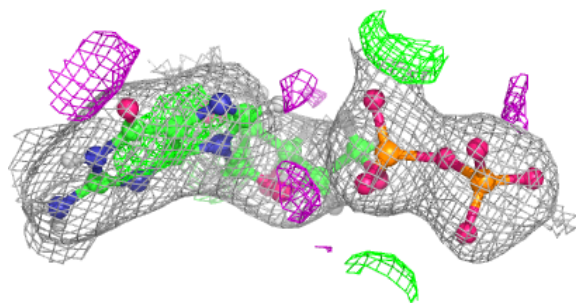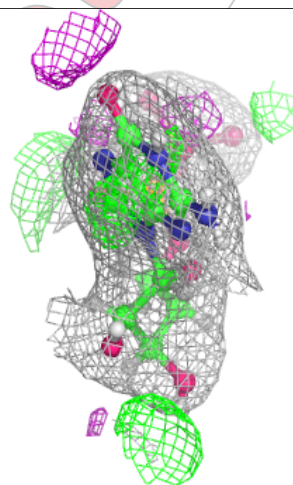

Not For Manuscript

**Electron density around GDP X 509:**

$2mF_o-DF_c$  (at 0.7 rmsd) in gray  
 $mF_o-DF_c$  (at 3 rmsd) in purple (negative)  
and green (positive)

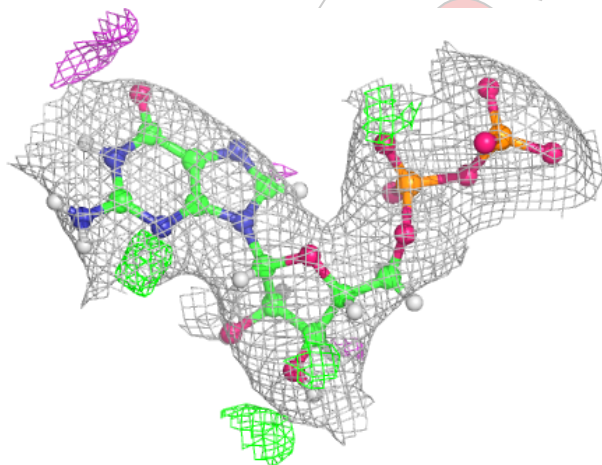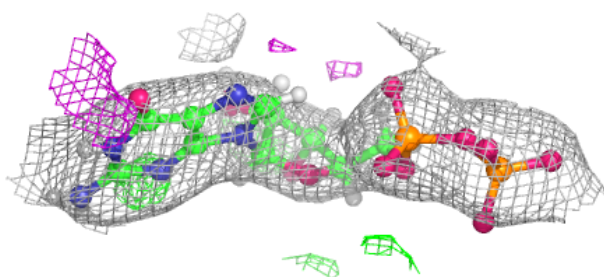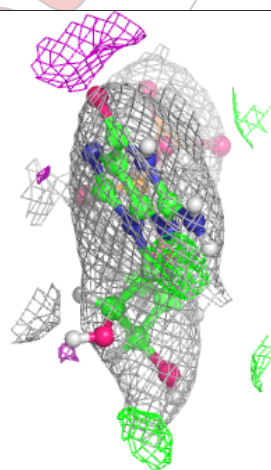

Not For Manuscript

**Electron density around SQB X 506:**

$2mF_o-DF_c$  (at 0.7 rmsd) in gray  
 $mF_o-DF_c$  (at 3 rmsd) in purple (negative)  
 and green (positive)

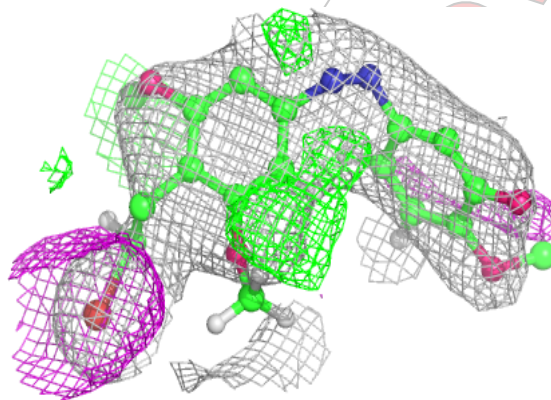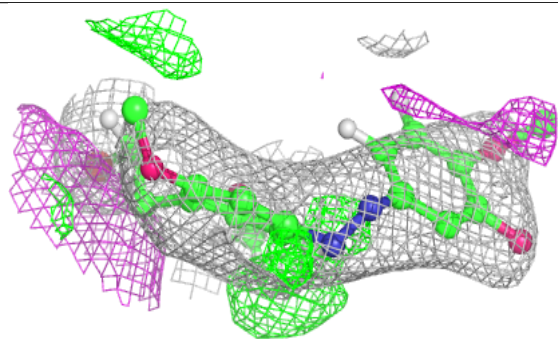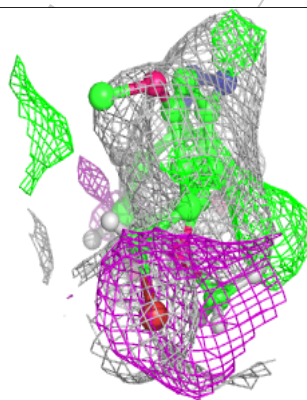

**Electron density around ACP X 511:**

$2mF_o-DF_c$  (at 0.7 rmsd) in gray  
 $mF_o-DF_c$  (at 3 rmsd) in purple (negative)  
 and green (positive)

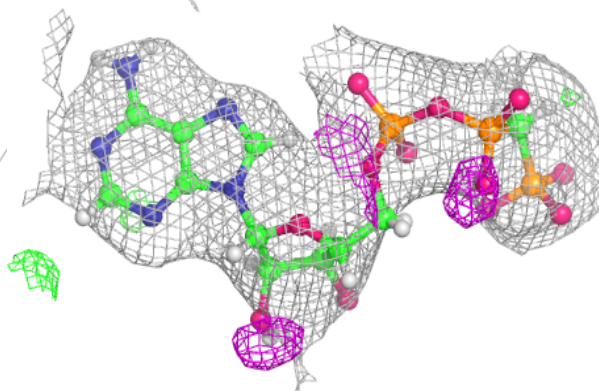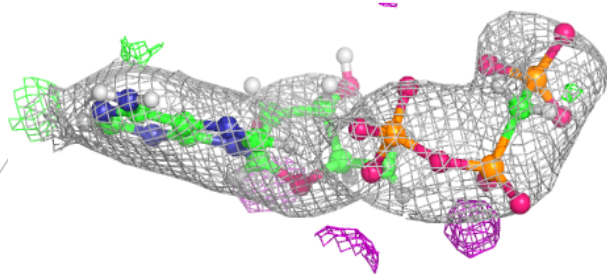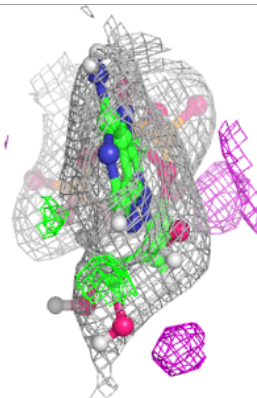

## 6.5 Other polymers [i](#)

Unable to reproduce the depositor's R factor - this section is therefore empty.

Not For Manuscript Review



# Preliminary Full wwPDB X-ray Structure Validation Report ⓘ

Feb 15, 2023 – 09:21 pm GMT

Deposition ID : D\_1292128627

**This wwPDB validation report is NOT for manuscript review**

This is a Preliminary Full wwPDB X-ray Structure Validation Report.

This report is produced by the wwPDB Deposition System during initial deposition but before annotation of the structure.

We welcome your comments at [validation@mail.wwpdb.org](mailto:validation@mail.wwpdb.org)

A user guide is available at

<https://www.wwpdb.org/validation/2017/XrayValidationReportHelp>

with specific help available everywhere you see the ⓘ symbol.

The types of validation reports are described at

<http://www.wwpdb.org/validation/2017/FAQs#types>.

---

The following versions of software and data (see [references ⓘ](#)) were used in the production of this report:

|                                |   |                                                                    |
|--------------------------------|---|--------------------------------------------------------------------|
| MolProbity                     | : | 4.02b-467                                                          |
| Mogul                          | : | 1.8.4, CSD as541be (2020)                                          |
| Xtriage (Phenix)               | : | 1.13                                                               |
| EDS                            | : | 2.32.1                                                             |
| buster-report                  | : | 1.1.7 (2018)                                                       |
| Percentile statistics          | : | 20191225.v01 (using entries in the PDB archive December 25th 2019) |
| Refmac                         | : | 5.8.0158                                                           |
| CCP4                           | : | 7.0.044 (Gargrove)                                                 |
| Ideal geometry (proteins)      | : | Engh & Huber (2001)                                                |
| Ideal geometry (DNA, RNA)      | : | Parkinson et al. (1996)                                            |
| Validation Pipeline (wwPDB-VP) | : | 2.32.1                                                             |

# 1 Overall quality at a glance i

The following experimental techniques were used to determine the structure:

*X-RAY DIFFRACTION*

The reported resolution of this entry is 2.80 Å.

Percentile scores (ranging between 0-100) for global validation metrics of the entry are shown in the following graphic. The table shows the number of entries on which the scores are based.

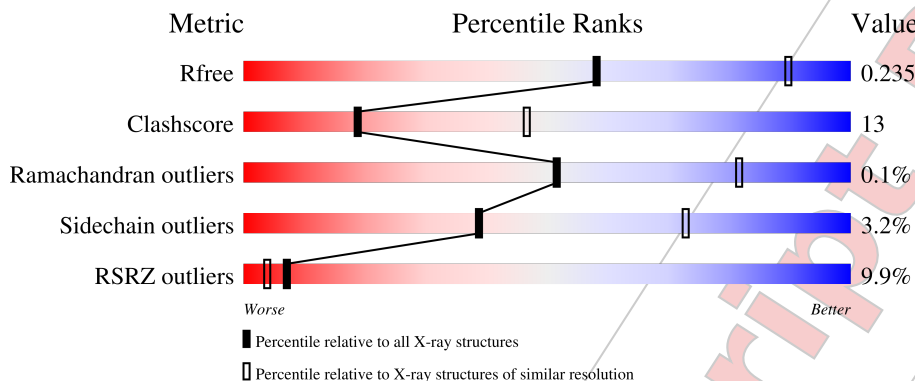

| Metric                | Whole archive<br>(#Entries) | Similar resolution<br>(#Entries, resolution range(Å)) |
|-----------------------|-----------------------------|-------------------------------------------------------|
| $R_{free}$            | 130704                      | 3140 (2.80-2.80)                                      |
| Clashscore            | 141614                      | 3569 (2.80-2.80)                                      |
| Ramachandran outliers | 138981                      | 3498 (2.80-2.80)                                      |
| Sidechain outliers    | 138945                      | 3500 (2.80-2.80)                                      |
| RSRZ outliers         | 127900                      | 3078 (2.80-2.80)                                      |

The table below summarises the geometric issues observed across the polymeric chains and their fit to the electron density. The red, orange, yellow and green segments of the lower bar indicate the fraction of residues that contain outliers for  $\geq 3$ , 2, 1 and 0 types of geometric quality criteria respectively. A grey segment represents the fraction of residues that are not modelled. The numeric value for each fraction is indicated below the corresponding segment, with a dot representing fractions  $\leq 5\%$ . The upper red bar (where present) indicates the fraction of residues that have poor fit to the electron density. The numeric value is given above the bar.

| Mol | Chain | Length | Quality of chain                                                                                                                                                                                                                                                                                                                     |
|-----|-------|--------|--------------------------------------------------------------------------------------------------------------------------------------------------------------------------------------------------------------------------------------------------------------------------------------------------------------------------------------|
| 1   | A     | 439    | <div style="display: flex; align-items: center;"> <div style="width: 4%; height: 10px; background-color: red; margin-right: 5px;"></div> <div style="width: 83%; height: 10px; background-color: green; margin-right: 5px;"></div> <div style="width: 17%; height: 10px; background-color: yellow; margin-right: 5px;"></div> </div> |
| 2   | B     | 428    | <div style="display: flex; align-items: center;"> <div style="width: 8%; height: 10px; background-color: red; margin-right: 5px;"></div> <div style="width: 72%; height: 10px; background-color: green; margin-right: 5px;"></div> <div style="width: 27%; height: 10px; background-color: yellow; margin-right: 5px;"></div> </div> |
| 3   | C     | 440    | <div style="display: flex; align-items: center;"> <div style="width: 3%; height: 10px; background-color: red; margin-right: 5px;"></div> <div style="width: 84%; height: 10px; background-color: green; margin-right: 5px;"></div> <div style="width: 16%; height: 10px; background-color: yellow; margin-right: 5px;"></div> </div> |
| 4   | D     | 431    | <div style="display: flex; align-items: center;"> <div style="width: 7%; height: 10px; background-color: red; margin-right: 5px;"></div> <div style="width: 76%; height: 10px; background-color: green; margin-right: 5px;"></div> <div style="width: 23%; height: 10px; background-color: yellow; margin-right: 5px;"></div> </div> |

Continued on next page...

*Continued from previous page...*

| Mol | Chain | Length | Quality of chain                                                                   |
|-----|-------|--------|------------------------------------------------------------------------------------|
| 5   | E     | 123    |  |
| 6   | F     | 351    |  |

Not For Manuscript Review

## 2 Entry composition [i](#)

There are 14 unique types of molecules in this entry. The entry contains 18186 atoms, of which 103 are hydrogens and 0 are deuteriums.

In the tables below, the ZeroOcc column contains the number of atoms modelled with zero occupancy, the AltConf column contains the number of residues with at least one atom in alternate conformation and the Trace column contains the number of residues modelled with at most 2 atoms.

- Molecule 1 is a protein.

| Mol | Chain | Residues | Atoms |      |     |     |    | ZeroOcc | AltConf | Trace |
|-----|-------|----------|-------|------|-----|-----|----|---------|---------|-------|
|     |       |          | Total | C    | N   | O   | S  |         |         |       |
| 1   | A     | 439      | 3480  | 2211 | 584 | 661 | 24 | 0       | 12      | 0     |

- Molecule 2 is a protein.

| Mol | Chain | Residues | Atoms |      |     |     |    | ZeroOcc | AltConf | Trace |
|-----|-------|----------|-------|------|-----|-----|----|---------|---------|-------|
|     |       |          | Total | C    | N   | O   | S  |         |         |       |
| 2   | B     | 428      | 3441  | 2167 | 581 | 664 | 29 | 7       | 15      | 0     |

- Molecule 3 is a protein.

| Mol | Chain | Residues | Atoms |      |     |     |    | ZeroOcc | AltConf | Trace |
|-----|-------|----------|-------|------|-----|-----|----|---------|---------|-------|
|     |       |          | Total | C    | N   | O   | S  |         |         |       |
| 3   | C     | 440      | 3519  | 2231 | 588 | 674 | 26 | 0       | 18      | 0     |

- Molecule 4 is a protein.

| Mol | Chain | Residues | Atoms |      |     |     |    | ZeroOcc | AltConf | Trace |
|-----|-------|----------|-------|------|-----|-----|----|---------|---------|-------|
|     |       |          | Total | C    | N   | O   | S  |         |         |       |
| 4   | D     | 431      | 3411  | 2143 | 580 | 660 | 28 | 0       | 6       | 0     |

- Molecule 5 is a protein.

| Mol | Chain | Residues | Atoms |     |     |     |   | ZeroOcc | AltConf | Trace |
|-----|-------|----------|-------|-----|-----|-----|---|---------|---------|-------|
|     |       |          | Total | C   | N   | O   | S |         |         |       |
| 5   | E     | 123      | 1042  | 644 | 188 | 204 | 6 | 0       | 5       | 0     |

- Molecule 6 is a protein.

| Mol | Chain | Residues | Atoms |      |     |     |    | ZeroOcc | AltConf | Trace |
|-----|-------|----------|-------|------|-----|-----|----|---------|---------|-------|
|     |       |          | Total | C    | N   | O   | S  |         |         |       |
| 6   | F     | 351      | 2890  | 1861 | 488 | 527 | 14 | 18      | 8       | 0     |

- Molecule 7 is GUANOSINE-5'-TRIPHOSPHATE (three-letter code: GTP) (formula: C<sub>10</sub>H<sub>16</sub>N<sub>5</sub>O<sub>14</sub>P<sub>3</sub>).



| Mol | Chain | Residues | Atoms |    |   |    | ZeroOcc | AltConf |   |
|-----|-------|----------|-------|----|---|----|---------|---------|---|
| 7   | X     | 1        | Total | C  | N | O  | P       | 0       | 0 |
|     |       |          | 32    | 10 | 5 | 14 | 3       |         |   |
| 7   | X     | 1        | Total | C  | N | O  | P       | 0       | 0 |
|     |       |          | 32    | 10 | 5 | 14 | 3       |         |   |

- Molecule 8 is MAGNESIUM ION (three-letter code: MG) (formula: Mg).

| Mol | Chain | Residues | Atoms |    | ZeroOcc | AltConf |
|-----|-------|----------|-------|----|---------|---------|
| 8   | X     | 1        | Total | Mg | 0       | 0       |
|     |       |          | 1     | 1  |         |         |
| 8   | X     | 1        | Total | Mg | 0       | 0       |
|     |       |          | 1     | 1  |         |         |
| 8   | X     | 1        | Total | Mg | 0       | 0       |
|     |       |          | 1     | 1  |         |         |
| 8   | X     | 1        | Total | Mg | 1       | 0       |
|     |       |          | 1     | 1  |         |         |

- Molecule 9 is CALCIUM ION (three-letter code: CA) (formula: Ca).

| Mol | Chain | Residues | Atoms |    | ZeroOcc | AltConf |
|-----|-------|----------|-------|----|---------|---------|
| 9   | X     | 1        | Total | Ca | 0       | 0       |
|     |       |          | 1     | 1  |         |         |
| 9   | X     | 1        | Total | Ca | 1       | 0       |
|     |       |          | 1     | 1  |         |         |

Continued on next page...

Continued from previous page...

| Mol | Chain | Residues | Atoms           | ZeroOcc | AltConf |
|-----|-------|----------|-----------------|---------|---------|
| 9   | X     | 1        | Total Ca<br>1 1 | 1       | 0       |
| 9   | X     | 1        | Total Ca<br>1 1 | 0       | 0       |

- Molecule 10 is a ligand with the chemical component id EPA but its atom names do not match the existing wwPDB Chemical Component Dictionary definition for EPA. Consequently no firm identification of ligand chemistry can be made. Once the structure is annotated then an identification and diagram will be given here.

| Mol | Chain | Residues | Atoms                             | ZeroOcc | AltConf |
|-----|-------|----------|-----------------------------------|---------|---------|
| 10  | X     | 1        | Total C H N O S<br>73 26 39 1 6 1 | 0       | 0       |
| 10  | X     | 1        | Total C H N O S<br>73 26 39 1 6 1 | 0       | 0       |

- Molecule 11 is a ligand with the chemical component id COL but its atom names do not match the existing wwPDB Chemical Component Dictionary definition for COL. Consequently no firm identification of ligand chemistry can be made. Once the structure is annotated then an identification and diagram will be given here.

| Mol | Chain | Residues | Atoms                         | ZeroOcc | AltConf |
|-----|-------|----------|-------------------------------|---------|---------|
| 11  | X     | 1        | Total C H N O<br>54 22 25 1 6 | 0       | 0       |

- Molecule 12 is GUANOSINE-5'-DIPHOSPHATE (three-letter code: GDP) (formula: C<sub>10</sub>H<sub>15</sub>N<sub>5</sub>O<sub>11</sub>P<sub>2</sub>).

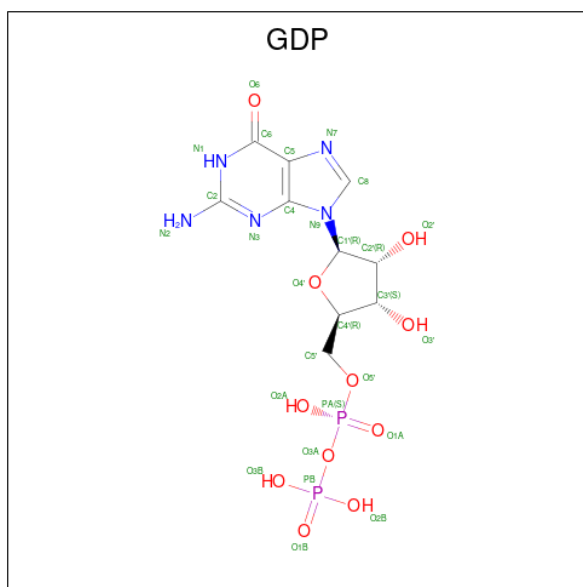

| Mol | Chain | Residues | Atoms |    |   |    |   | ZeroOcc | AltConf |
|-----|-------|----------|-------|----|---|----|---|---------|---------|
|     |       |          | Total | C  | N | O  | P |         |         |
| 12  | X     | 1        | 28    | 10 | 5 | 11 | 2 | 0       | 0       |
| 12  | X     | 1        | 28    | 10 | 5 | 11 | 2 | 0       | 0       |

- Molecule 13 is PHOSPHOMETHYLPHOSPHONIC ACID ADENYLATE ESTER (three-letter code: ACP) (formula:  $C_{11}H_{18}N_5O_{12}P_3$ ).

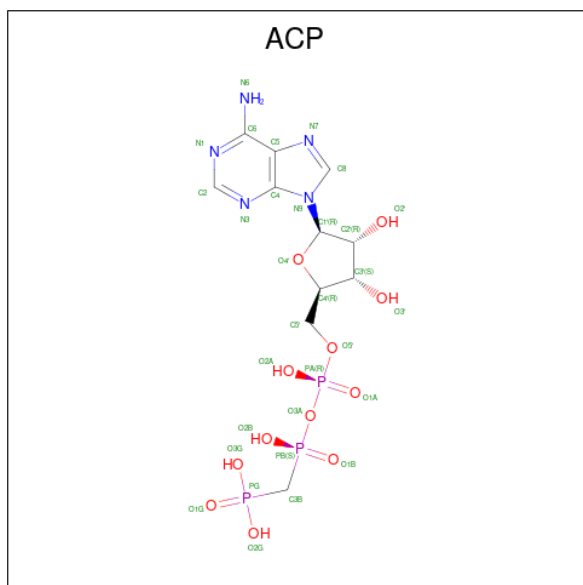

| Mol | Chain | Residues | Atoms |    |   |    |   | ZeroOcc | AltConf |
|-----|-------|----------|-------|----|---|----|---|---------|---------|
|     |       |          | Total | C  | N | O  | P |         |         |
| 13  | X     | 1        | 31    | 11 | 5 | 12 | 3 | 0       | 0       |

- Molecule 14 is water.

| Mol | Chain | Residues | Atoms |    | ZeroOcc | AltConf |
|-----|-------|----------|-------|----|---------|---------|
| 14  | S     | 44       | Total | O  | 0       | 0       |
|     |       |          | 44    | 44 |         |         |

### 3 Residue-property plots

These plots are drawn for all protein, RNA, DNA and oligosaccharide chains in the entry. The first graphic for a chain summarises the proportions of the various outlier classes displayed in the second graphic. The second graphic shows the sequence view annotated by issues in geometry and electron density. Residues are color-coded according to the number of geometric quality criteria for which they contain at least one outlier: green = 0, yellow = 1, orange = 2 and red = 3 or more. A red dot above a residue indicates a poor fit to the electron density ( $RSRZ > 2$ ). Stretches of 2 or more consecutive residues without any outlier are shown as a green connector. Residues present in the sample, but not in the model, are shown in grey.

- Molecule 1:

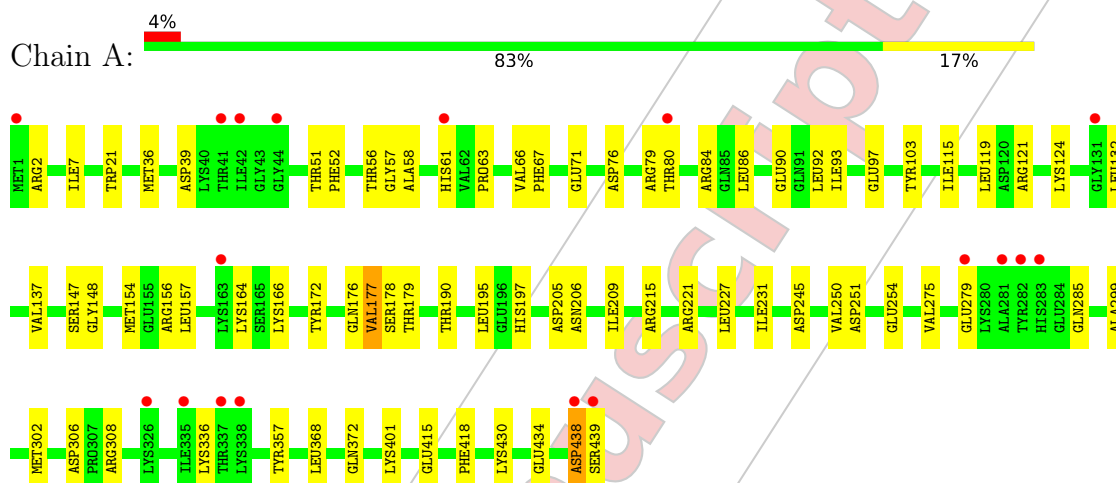

- Molecule 2:

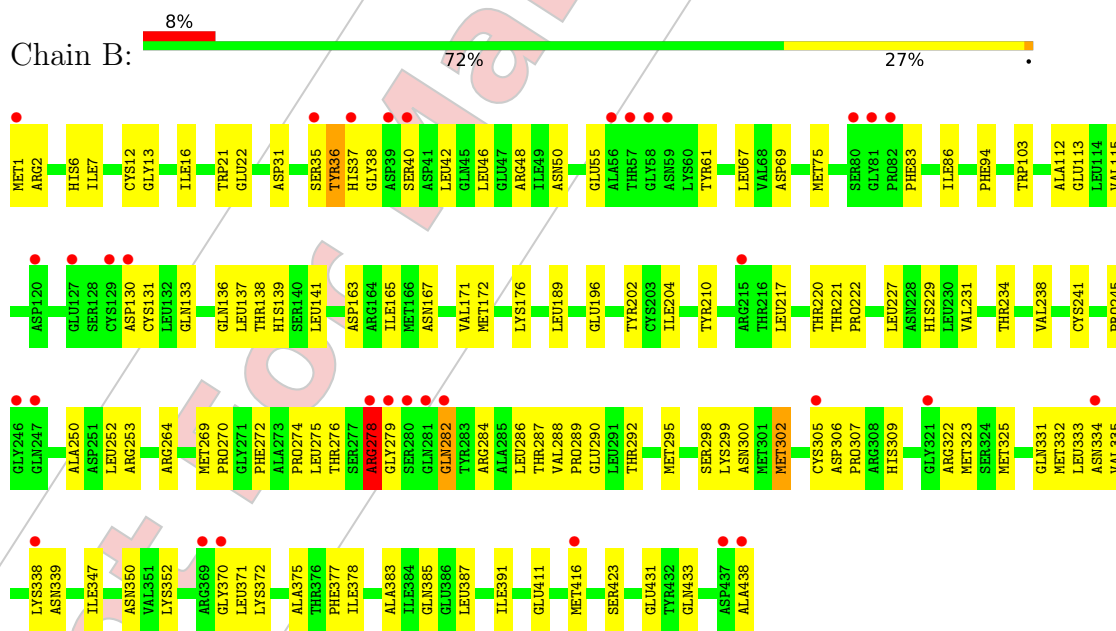

- Molecule 3:

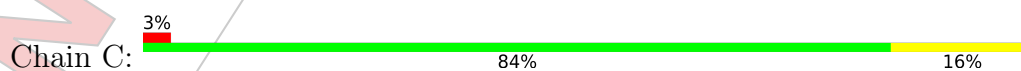

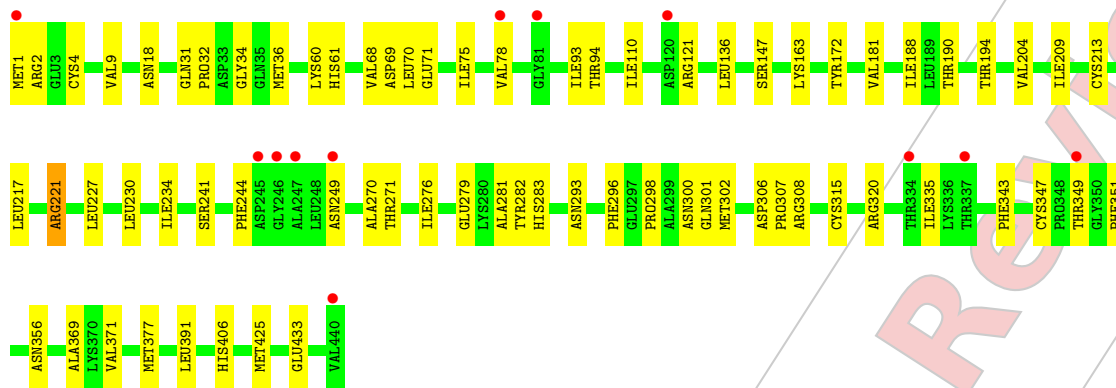

• Molecule 4:

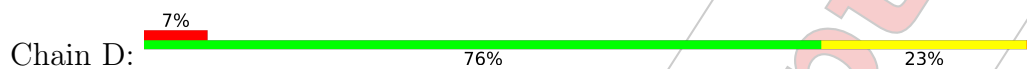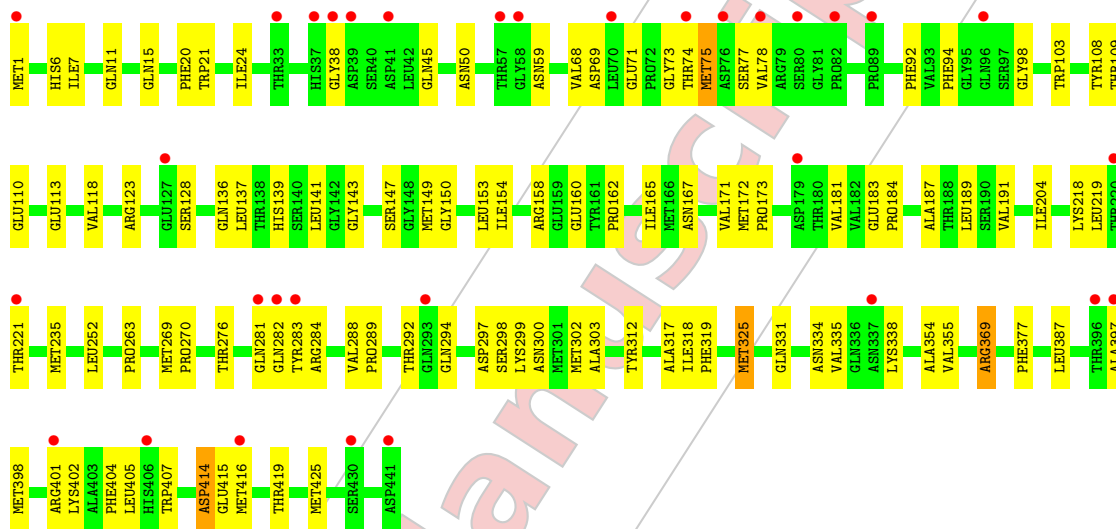

• Molecule 5:

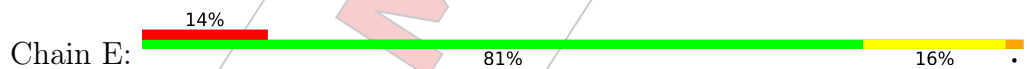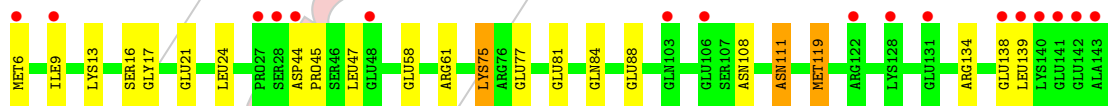

• Molecule 6:

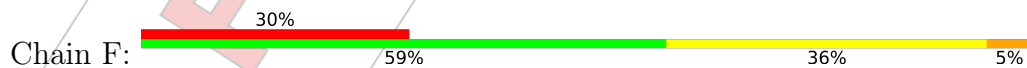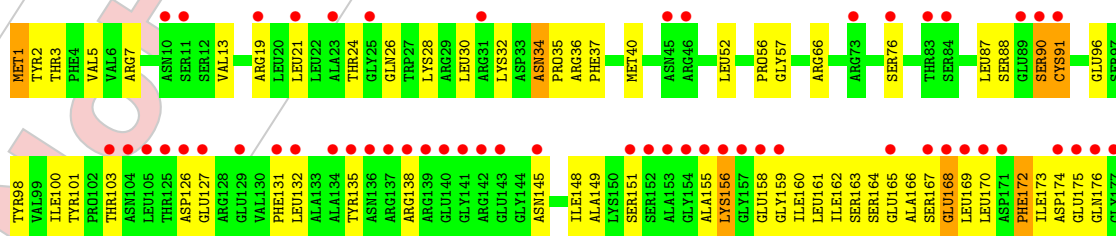

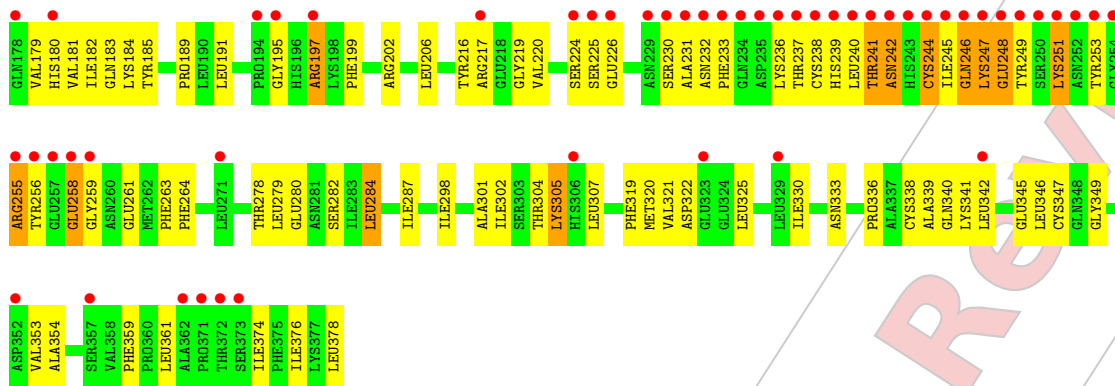

Not For Manuscript Review

## 4 Data and refinement statistics i

| Property                                                                | Value                                                       | Source           |
|-------------------------------------------------------------------------|-------------------------------------------------------------|------------------|
| Space group                                                             | P 21 21 21                                                  | Depositor        |
| Cell constants<br>a, b, c, $\alpha$ , $\beta$ , $\gamma$                | 106.76Å 160.76Å 180.96Å<br>90.00° 90.00° 90.00°             | Depositor        |
| Resolution (Å)                                                          | 15.26 – 2.80<br>15.26 – 2.50                                | Depositor<br>EDS |
| % Data completeness<br>(in resolution range)                            | 99.9 (15.26-2.80)<br>99.9 (15.26-2.50)                      | Depositor<br>EDS |
| $R_{merge}$                                                             | (Not available)                                             | Depositor        |
| $R_{sym}$                                                               | (Not available)                                             | Depositor        |
| $\langle I/\sigma(I) \rangle$ <sup>1</sup>                              | 1.09 (at 2.51Å)                                             | Xtrriage         |
| Refinement program                                                      | .                                                           | Depositor        |
| R, $R_{free}$                                                           | 0.178 , 0.227<br>0.193 , 0.235                              | Depositor<br>DCC |
| $R_{free}$ test set                                                     | 2000 reflections (1.86%)                                    | wwPDB-VP         |
| Wilson B-factor (Å <sup>2</sup> )                                       | 61.2                                                        | Xtrriage         |
| Anisotropy                                                              | 0.047                                                       | Xtrriage         |
| Bulk solvent $k_{sol}$ (e/Å <sup>3</sup> ), $B_{sol}$ (Å <sup>2</sup> ) | 0.34 , 58.0                                                 | EDS              |
| L-test for twinning <sup>2</sup>                                        | $\langle  L  \rangle = 0.50$ , $\langle L^2 \rangle = 0.33$ | Xtrriage         |
| Estimated twinning fraction                                             | No twinning to report.                                      | Xtrriage         |
| $F_o, F_c$ correlation                                                  | 0.95                                                        | EDS              |
| Total number of atoms                                                   | 18186                                                       | wwPDB-VP         |
| Average B, all atoms (Å <sup>2</sup> )                                  | 67.0                                                        | wwPDB-VP         |

Xtrriage's analysis on translational NCS is as follows: *The largest off-origin peak in the Patterson function is 2.58% of the height of the origin peak. No significant pseudotranslation is detected.*

<sup>1</sup>Intensities estimated from amplitudes.

<sup>2</sup>Theoretical values of  $\langle |L| \rangle$ ,  $\langle L^2 \rangle$  for acentric reflections are 0.5, 0.333 respectively for untwinned datasets, and 0.375, 0.2 for perfectly twinned datasets.

## 5 Model quality i

### 5.1 Standard geometry i

Bond lengths and bond angles in the following residue types are not validated in this section: GDP, GTP, EPA, ACP, CA, MG, COL

The Z score for a bond length (or angle) is the number of standard deviations the observed value is removed from the expected value. A bond length (or angle) with  $|Z| > 5$  is considered an outlier worth inspection. RMSZ is the root-mean-square of all Z scores of the bond lengths (or angles).

| Mol | Chain | Bond lengths |         | Bond angles |                |
|-----|-------|--------------|---------|-------------|----------------|
|     |       | RMSZ         | # Z  >5 | RMSZ        | # Z  >5        |
| 1   | A     | 0.49         | 0/3594  | 0.73        | 0/4881         |
| 2   | B     | 0.50         | 0/3555  | 0.78        | 2/4813 (0.0%)  |
| 3   | C     | 0.55         | 0/3648  | 0.73        | 1/4955 (0.0%)  |
| 4   | D     | 0.48         | 0/3504  | 0.74        | 1/4748 (0.0%)  |
| 5   | E     | 0.54         | 0/1066  | 0.81        | 2/1415 (0.1%)  |
| 6   | F     | 0.46         | 0/2975  | 0.77        | 1/4022 (0.0%)  |
| All | All   | 0.50         | 0/18342 | 0.75        | 7/24834 (0.0%) |

Chiral center outliers are detected by calculating the chiral volume of a chiral center and verifying if the center is modelled as a planar moiety or with the opposite hand. A planarity outlier is detected by checking planarity of atoms in a peptide group, atoms in a mainchain group or atoms of a sidechain that are expected to be planar.

| Mol | Chain | #Chirality outliers | #Planarity outliers |
|-----|-------|---------------------|---------------------|
| 1   | A     | 0                   | 1                   |
| 2   | B     | 0                   | 1                   |
| 4   | D     | 0                   | 1                   |
| 6   | F     | 0                   | 1                   |
| All | All   | 0                   | 4                   |

There are no bond length outliers.

All (7) bond angle outliers are listed below:

| Mol | Chain | Res | Type | Atoms      | Z     | Observed(°) | Ideal(°) |
|-----|-------|-----|------|------------|-------|-------------|----------|
| 2   | B     | 264 | ARG  | CD-NE-CZ   | 5.74  | 131.63      | 123.60   |
| 6   | F     | 181 | VAL  | CG1-CB-CG2 | 5.35  | 119.46      | 110.90   |
| 2   | B     | 264 | ARG  | NE-CZ-NH2  | -5.28 | 117.66      | 120.30   |
| 4   | D     | 158 | ARG  | CA-CB-CG   | 5.26  | 124.97      | 113.40   |
| 3   | C     | 433 | GLU  | CA-CB-CG   | 5.13  | 124.68      | 113.40   |
| 5   | E     | 119 | MET  | CA-CB-CG   | 5.10  | 121.97      | 113.30   |

*Continued on next page...*

Continued from previous page...

| Mol | Chain | Res | Type | Atoms    | Z     | Observed(°) | Ideal(°) |
|-----|-------|-----|------|----------|-------|-------------|----------|
| 5   | E     | 119 | MET  | CB-CG-SD | -5.06 | 97.23       | 112.40   |

There are no chirality outliers.

All (4) planarity outliers are listed below:

| Mol | Chain | Res | Type | Group     |
|-----|-------|-----|------|-----------|
| 1   | A     | 2   | ARG  | Sidechain |
| 2   | B     | 278 | ARG  | Sidechain |
| 4   | D     | 369 | ARG  | Sidechain |
| 6   | F     | 255 | ARG  | Sidechain |

## 5.2 Too-close contacts [i](#)

In the following table, the Non-H and H(model) columns list the number of non-hydrogen atoms and hydrogen atoms in the chain respectively. The H(added) column lists the number of hydrogen atoms added and optimized by MolProbity. The Clashes column lists the number of clashes within the asymmetric unit, whereas Symm-Clashes lists symmetry-related clashes.

| Mol | Chain | Non-H | H(model) | H(added) | Clashes | Symm-Clashes |
|-----|-------|-------|----------|----------|---------|--------------|
| 1   | A     | 3480  | 0        | 3427     | 68      | 0            |
| 2   | B     | 3441  | 0        | 3356     | 119     | 2            |
| 3   | C     | 3519  | 0        | 3458     | 60      | 2            |
| 4   | D     | 3411  | 0        | 3306     | 79      | 0            |
| 5   | E     | 1042  | 0        | 1065     | 15      | 0            |
| 6   | F     | 2890  | 0        | 2894     | 144     | 0            |
| 7   | X     | 64    | 0        | 24       | 0       | 0            |
| 8   | X     | 4     | 0        | 0        | 0       | 0            |
| 9   | X     | 4     | 0        | 0        | 0       | 0            |
| 10  | X     | 68    | 78       | 30       | 8       | 0            |
| 11  | X     | 29    | 25       | 0        | 3       | 0            |
| 12  | X     | 56    | 0        | 24       | 3       | 0            |
| 13  | X     | 31    | 0        | 14       | 4       | 0            |
| 14  | S     | 44    | 0        | 0        | 1       | 0            |
| All | All   | 18083 | 103      | 17598    | 465     | 2            |

The all-atom clashscore is defined as the number of clashes found per 1000 atoms (including hydrogen atoms). The all-atom clashscore for this structure is 13.

All (465) close contacts within the same asymmetric unit are listed below, sorted by their clash magnitude.

| Atom-1              | Atom-2              | Interatomic distance (Å) | Clash overlap (Å) |
|---------------------|---------------------|--------------------------|-------------------|
| 1:A:221:ARG:HH21    | 2:B:325:MET:HE2     | 1.12                     | 1.07              |
| 1:A:176:GLN:HG3     | 6:F:56:PRO:HB3      | 1.33                     | 1.06              |
| 2:B:338:LYS:O       | 2:B:338:LYS:NZ      | 1.90                     | 1.02              |
| 4:D:284:ARG:HH22    | 4:D:294:GLN:HE22    | 1.05                     | 0.96              |
| 4:D:318:ILE:HD12    | 4:D:354:ALA:HB3     | 1.49                     | 0.92              |
| 2:B:75:MET:HE1      | 2:B:94:PHE:HB3      | 1.51                     | 0.91              |
| 2:B:13:GLY:HA2      | 2:B:138[B]:THR:HG22 | 1.51                     | 0.90              |
| 6:F:167:SER:HA      | 6:F:170:LEU:HG      | 1.50                     | 0.90              |
| 3:C:279:GLU:N       | 3:C:279:GLU:OE2     | 2.05                     | 0.90              |
| 6:F:155:ALA:H       | 6:F:158:GLU:HB3     | 1.36                     | 0.90              |
| 1:A:221:ARG:HH21    | 2:B:325:MET:CE      | 1.84                     | 0.90              |
| 6:F:131:PHE:CE1     | 6:F:182:ILE:HG21    | 2.06                     | 0.90              |
| 1:A:306:ASP:OD1     | 1:A:308:ARG:HD3     | 1.74                     | 0.88              |
| 6:F:135:TYR:CZ      | 6:F:166:ALA:HB2     | 2.08                     | 0.88              |
| 3:C:204:VAL:HG22    | 3:C:302[B]:MET:CE   | 2.06                     | 0.86              |
| 6:F:161:LEU:HD23    | 6:F:169:LEU:HD23    | 1.56                     | 0.85              |
| 4:D:1:MET:HG3       | 4:D:50:ASN:HD22     | 1.41                     | 0.85              |
| 2:B:238[B]:VAL:HG22 | 2:B:378:ILE:HD11    | 1.60                     | 0.83              |
| 6:F:3:THR:HB        | 6:F:30:LEU:HD11     | 1.61                     | 0.83              |
| 3:C:204:VAL:HG22    | 3:C:302[B]:MET:HE3  | 1.61                     | 0.82              |
| 6:F:263:PHE:HE1     | 6:F:341:LYS:HD3     | 1.44                     | 0.82              |
| 10:X:506:EPA:O5     | 10:X:506:EPA:O3     | 1.91                     | 0.81              |
| 4:D:317:ALA:O       | 4:D:318:ILE:HD13    | 1.79                     | 0.81              |
| 2:B:278:ARG:HD2     | 2:B:279:GLY:HA2     | 1.63                     | 0.81              |
| 3:C:18:ASN:HD21     | 3:C:78:VAL:HG22     | 1.44                     | 0.81              |
| 2:B:331:GLN:HA      | 2:B:334:ASN:HD21    | 1.45                     | 0.80              |
| 6:F:217:ARG:HD3     | 6:F:376:ILE:HG13    | 1.64                     | 0.80              |
| 1:A:154:MET:HE2     | 1:A:154:MET:HA      | 1.65                     | 0.79              |
| 4:D:334:ASN:OD1     | 4:D:338:LYS:HE3     | 1.83                     | 0.79              |
| 2:B:305:CYS:HB3     | 2:B:383:ALA:O       | 1.82                     | 0.79              |
| 2:B:331:GLN:HA      | 2:B:334:ASN:ND2     | 1.98                     | 0.78              |
| 2:B:332:MET:O       | 2:B:335:VAL:HG12    | 1.84                     | 0.77              |
| 2:B:22:GLU:HG2      | 2:B:83:PHE:CD1      | 2.20                     | 0.77              |
| 6:F:3:THR:HB        | 6:F:30:LEU:CD1      | 2.14                     | 0.77              |
| 4:D:292:THR:HG22    | 4:D:335:VAL:HG21    | 1.66                     | 0.76              |
| 1:A:209[A]:ILE:HG22 | 1:A:227:LEU:HD22    | 1.68                     | 0.76              |
| 4:D:1:MET:HG3       | 4:D:50:ASN:ND2      | 2.01                     | 0.76              |
| 2:B:288:VAL:HG22    | 2:B:323:MET:HE2     | 1.67                     | 0.76              |
| 4:D:284:ARG:HH22    | 4:D:294:GLN:NE2     | 1.82                     | 0.75              |
| 3:C:209:ILE:HG22    | 3:C:227:LEU:HD22    | 1.67                     | 0.74              |
| 6:F:3:THR:OG1       | 6:F:37:PHE:HA       | 1.87                     | 0.74              |
| 4:D:1:MET:CG        | 4:D:50:ASN:HD22     | 2.00                     | 0.74              |

Continued on next page...

Continued from previous page...

| Atom-1             | Atom-2             | Interatomic distance (Å) | Clash overlap (Å) |
|--------------------|--------------------|--------------------------|-------------------|
| 1:A:176:GLN:CG     | 6:F:56:PRO:HB3     | 2.14                     | 0.73              |
| 6:F:173:ILE:HD13   | 6:F:180:HIS:HB2    | 1.69                     | 0.73              |
| 6:F:184:LYS:HD2    | 6:F:185:TYR:N      | 2.02                     | 0.72              |
| 1:A:179:THR:O      | 2:B:352:LYS:HE2    | 1.88                     | 0.72              |
| 2:B:370:GLY:O      | 2:B:371:LEU:HD13   | 1.89                     | 0.72              |
| 6:F:32:LYS:HD3     | 6:F:32:LYS:N       | 2.04                     | 0.71              |
| 3:C:4[A]:CYS:SG    | 3:C:136:LEU:HG     | 2.31                     | 0.71              |
| 6:F:167:SER:HA     | 6:F:170:LEU:CG     | 2.20                     | 0.71              |
| 1:A:56:THR:HG22    | 1:A:58:ALA:H       | 1.53                     | 0.71              |
| 2:B:75:MET:HE1     | 2:B:94:PHE:CB      | 2.19                     | 0.71              |
| 6:F:131:PHE:HE1    | 6:F:182:ILE:HG21   | 1.52                     | 0.71              |
| 3:C:249:ASN:OD1    | 3:C:356[A]:ASN:ND2 | 2.24                     | 0.70              |
| 6:F:135:TYR:CE2    | 6:F:166:ALA:HB2    | 2.25                     | 0.70              |
| 2:B:75:MET:CE      | 2:B:94:PHE:HB3     | 2.21                     | 0.70              |
| 2:B:274:PRO:HG2    | 10:X:506:EPA:C25   | 2.22                     | 0.70              |
| 4:D:1:MET:HG3      | 4:D:50:ASN:CB      | 2.22                     | 0.70              |
| 2:B:83:PHE:O       | 2:B:86:ILE:HG22    | 1.92                     | 0.69              |
| 1:A:97:GLU:OE1     | 2:B:1:MET:HE2      | 1.92                     | 0.69              |
| 2:B:36:TYR:CE2     | 2:B:46:LEU:HD11    | 2.27                     | 0.69              |
| 2:B:75:MET:HE1     | 2:B:94:PHE:CG      | 2.28                     | 0.69              |
| 4:D:59:ASN:OD1     | 4:D:59:ASN:O       | 2.11                     | 0.69              |
| 6:F:7:ARG:HD3      | 6:F:40:MET:HE3     | 1.74                     | 0.69              |
| 2:B:2:ARG:HB2      | 2:B:2:ARG:CZ       | 2.22                     | 0.69              |
| 2:B:306:ASP:HB3    | 2:B:309:HIS:ND1    | 2.08                     | 0.69              |
| 2:B:279:GLY:O      | 2:B:282:GLN:HB3    | 1.92                     | 0.68              |
| 6:F:195:GLY:HA3    | 6:F:197:ARG:HD2    | 1.74                     | 0.68              |
| 2:B:36:TYR:CD2     | 2:B:46:LEU:HD21    | 2.28                     | 0.68              |
| 3:C:234:ILE:HG21   | 3:C:302[B]:MET:SD  | 2.34                     | 0.68              |
| 1:A:215:ARG:NH1    | 1:A:299:ALA:HB1    | 2.09                     | 0.68              |
| 3:C:18:ASN:ND2     | 3:C:78:VAL:HG22    | 2.09                     | 0.67              |
| 6:F:34:ASN:HD22    | 6:F:35:PRO:HD2     | 1.59                     | 0.67              |
| 2:B:295[A]:MET:HE2 | 2:B:377:PHE:HB2    | 1.76                     | 0.67              |
| 4:D:103:TRP:CE3    | 4:D:189:LEU:HD13   | 2.31                     | 0.66              |
| 1:A:401:LYS:HE2    | 2:B:438:ALA:HB1    | 1.77                     | 0.66              |
| 3:C:270:ALA:O      | 3:C:302[B]:MET:HG3 | 1.95                     | 0.66              |
| 1:A:209[B]:ILE:CD1 | 1:A:231:ILE:HD11   | 2.26                     | 0.66              |
| 2:B:217:LEU:HD22   | 10:X:506:EPA:H141  | 1.77                     | 0.66              |
| 2:B:287:THR:OG1    | 2:B:289:PRO:HD2    | 1.96                     | 0.65              |
| 2:B:385:GLN:HE22   | 2:B:433:GLN:NE2    | 1.94                     | 0.65              |
| 4:D:416:MET:HA     | 4:D:419:THR:OG1    | 1.97                     | 0.65              |
| 6:F:330:ILE:HG21   | 13:X:515:ACP:H5'2  | 1.79                     | 0.65              |

Continued on next page...

Continued from previous page...

| Atom-1              | Atom-2              | Interatomic distance (Å) | Clash overlap (Å) |
|---------------------|---------------------|--------------------------|-------------------|
| 4:D:6:HIS:CD2       | 4:D:21:TRP:HE1      | 2.14                     | 0.65              |
| 4:D:141:LEU:HD12    | 4:D:172:MET:SD      | 2.36                     | 0.65              |
| 1:A:166:LYS:HE2     | 1:A:197:HIS:O       | 1.97                     | 0.64              |
| 6:F:30:LEU:HD22     | 6:F:34:ASN:OD1      | 1.98                     | 0.64              |
| 5:E:44:ASP:HB3      | 5:E:45:PRO:HD3      | 1.79                     | 0.64              |
| 2:B:238[B]:VAL:HG22 | 2:B:378:ILE:CD1     | 2.26                     | 0.64              |
| 3:C:244:PHE:HB2     | 3:C:356[B]:ASN:HD21 | 1.61                     | 0.64              |
| 4:D:317:ALA:C       | 4:D:318:ILE:HD13    | 2.19                     | 0.63              |
| 6:F:132:LEU:HD21    | 6:F:170:LEU:HD23    | 1.80                     | 0.63              |
| 3:C:276:ILE:CD1     | 3:C:369:ALA:HB3     | 2.28                     | 0.63              |
| 4:D:276:THR:HB      | 4:D:281:GLN:HG3     | 1.79                     | 0.63              |
| 1:A:285:GLN:HA      | 1:A:285:GLN:OE1     | 1.99                     | 0.63              |
| 2:B:36:TYR:CZ       | 2:B:46:LEU:HD11     | 2.33                     | 0.63              |
| 1:A:250:VAL:HG12    | 1:A:254:GLU:OE1     | 1.97                     | 0.63              |
| 1:A:285:GLN:HG3     | 1:A:372[B]:GLN:NE2  | 2.14                     | 0.63              |
| 2:B:241[B]:CYS:HB2  | 11:X:507:COL:C14    | 2.29                     | 0.62              |
| 6:F:172:PHE:O       | 6:F:172:PHE:CD1     | 2.52                     | 0.62              |
| 6:F:202:ARG:HB3     | 6:F:220[B]:VAL:HG12 | 1.82                     | 0.62              |
| 1:A:336:LYS:HG3     | 5:E:24:LEU:HD13     | 1.81                     | 0.62              |
| 6:F:258:GLU:N       | 6:F:258:GLU:OE1     | 2.33                     | 0.62              |
| 2:B:221:THR:HG22    | 2:B:221:THR:O       | 1.99                     | 0.61              |
| 6:F:1:MET:HE3       | 6:F:28:LYS:HG2      | 1.82                     | 0.61              |
| 6:F:349:GLY:O       | 6:F:353[B]:VAL:HG12 | 1.99                     | 0.61              |
| 2:B:136:GLN:HA      | 2:B:167:ASN:O       | 2.00                     | 0.61              |
| 6:F:172:PHE:O       | 6:F:172:PHE:HD1     | 1.84                     | 0.61              |
| 1:A:79:ARG:O        | 1:A:84:ARG:HB2      | 2.01                     | 0.60              |
| 2:B:75:MET:HE1      | 2:B:94:PHE:CD2      | 2.37                     | 0.60              |
| 3:C:276:ILE:HD12    | 3:C:276:ILE:O       | 2.02                     | 0.60              |
| 2:B:338:LYS:HG3     | 2:B:339:ASN:OD1     | 2.01                     | 0.60              |
| 6:F:151:SER:HG      | 6:F:180:HIS:CE1     | 2.20                     | 0.60              |
| 6:F:172:PHE:O       | 6:F:175:GLU:HB3     | 2.02                     | 0.59              |
| 6:F:225:SER:H       | 6:F:246:GLN:HE22    | 1.50                     | 0.59              |
| 3:C:276:ILE:HD13    | 3:C:281:ALA:HB2     | 1.83                     | 0.59              |
| 4:D:11:GLN:HB3      | 12:X:513:GDP:O2A    | 2.02                     | 0.59              |
| 1:A:357:TYR:CE2     | 5:E:17:GLY:HA2      | 2.36                     | 0.59              |
| 4:D:294:GLN:HG2     | 4:D:300:ASN:ND2     | 2.17                     | 0.59              |
| 2:B:141:LEU:HD12    | 2:B:172:MET:SD      | 2.42                     | 0.59              |
| 2:B:36:TYR:HE1      | 2:B:38:GLY:HA3      | 1.68                     | 0.58              |
| 3:C:296:PHE:HZ      | 3:C:351:PHE:HE2     | 1.50                     | 0.58              |
| 4:D:183:GLU:N       | 4:D:184:PRO:HD2     | 2.18                     | 0.58              |
| 2:B:36:TYR:CE2      | 2:B:46:LEU:CD1      | 2.86                     | 0.58              |

Continued on next page...

Continued from previous page...

| Atom-1              | Atom-2              | Interatomic distance (Å) | Clash overlap (Å) |
|---------------------|---------------------|--------------------------|-------------------|
| 1:A:336:LYS:HD3     | 1:A:336:LYS:O       | 2.02                     | 0.58              |
| 2:B:2:ARG:NH2       | 2:B:131:CYS:SG      | 2.76                     | 0.58              |
| 6:F:135:TYR:CE1     | 6:F:166:ALA:HB2     | 2.38                     | 0.58              |
| 6:F:219:GLY:HA3     | 6:F:264:PHE:CZ      | 2.38                     | 0.58              |
| 2:B:46:LEU:N        | 2:B:46:LEU:HD12     | 2.19                     | 0.58              |
| 2:B:278:ARG:HE      | 2:B:282:GLN:HE21    | 1.50                     | 0.58              |
| 2:B:333:LEU:HD13    | 6:F:57:GLY:HA3      | 1.85                     | 0.58              |
| 6:F:339:ALA:HB3     | 6:F:342:LEU:HD12    | 1.85                     | 0.58              |
| 10:X:512:EPA:C13    | 10:X:512:EPA:C25    | 2.82                     | 0.58              |
| 3:C:293[B]:ASN:OD1  | 3:C:335:ILE:HD11    | 2.04                     | 0.58              |
| 6:F:34:ASN:HD22     | 6:F:35:PRO:CD       | 2.16                     | 0.58              |
| 6:F:132:LEU:HD21    | 6:F:170:LEU:CD2     | 2.34                     | 0.58              |
| 2:B:69:ASP:O        | 2:B:94:PHE:HA       | 2.04                     | 0.57              |
| 4:D:404:PHE:O       | 4:D:407:TRP:HB2     | 2.03                     | 0.57              |
| 1:A:90:GLU:HG2      | 1:A:124:LYS:NZ      | 2.20                     | 0.57              |
| 6:F:225:SER:O       | 6:F:253:TYR:HB3     | 2.04                     | 0.57              |
| 3:C:271:THR:HG23    | 3:C:300:ASN:O       | 2.04                     | 0.57              |
| 2:B:292:THR:O       | 2:B:295[A]:MET:HG2  | 2.04                     | 0.57              |
| 4:D:162:PRO:HB2     | 5:E:119:MET:HE1     | 1.86                     | 0.57              |
| 2:B:202:TYR:CZ      | 2:B:238[B]:VAL:HG11 | 2.40                     | 0.57              |
| 3:C:70:LEU:HD13     | 3:C:110:ILE:CG2     | 2.35                     | 0.57              |
| 6:F:162:ILE:HG13    | 6:F:236:LYS:HE3     | 1.87                     | 0.56              |
| 3:C:270:ALA:HB3     | 3:C:302[B]:MET:HG3  | 1.88                     | 0.56              |
| 3:C:315[B]:CYS:SG   | 3:C:377:MET:SD      | 3.03                     | 0.56              |
| 6:F:96:GLU:OE2      | 6:F:98:TYR:OH       | 2.20                     | 0.56              |
| 6:F:131:PHE:HE1     | 6:F:182:ILE:CG2     | 2.18                     | 0.56              |
| 6:F:165:GLU:HB2     | 6:F:168:GLU:HB3     | 1.87                     | 0.56              |
| 4:D:191:VAL:HG11    | 4:D:425:MET:HE3     | 1.88                     | 0.56              |
| 6:F:161:LEU:HD23    | 6:F:169:LEU:CD2     | 2.32                     | 0.56              |
| 2:B:288:VAL:HG22    | 2:B:323:MET:CE      | 2.35                     | 0.56              |
| 1:A:177:VAL:HG21    | 1:A:206:ASN:HB3     | 1.86                     | 0.56              |
| 2:B:295[B]:MET:SD   | 2:B:375:ALA:HB1     | 2.46                     | 0.56              |
| 1:A:209[B]:ILE:HD13 | 1:A:231:ILE:HD11    | 1.87                     | 0.56              |
| 3:C:301:GLN:NE2     | 3:C:307:PRO:HG2     | 2.21                     | 0.56              |
| 6:F:5:VAL:HG13      | 6:F:32:LYS:HA       | 1.88                     | 0.56              |
| 6:F:330:ILE:N       | 6:F:330:ILE:HD13    | 2.21                     | 0.56              |
| 1:A:176:GLN:HG3     | 6:F:56:PRO:CB       | 2.22                     | 0.55              |
| 2:B:36:TYR:CE1      | 2:B:38:GLY:N        | 2.74                     | 0.55              |
| 4:D:123:ARG:NH1     | 4:D:160:GLU:OE1     | 2.38                     | 0.55              |
| 4:D:171:VAL:HA      | 4:D:204:ILE:O       | 2.06                     | 0.55              |
| 6:F:131:PHE:O       | 6:F:135:TYR:HB2     | 2.05                     | 0.55              |

Continued on next page...

Continued from previous page...

| Atom-1            | Atom-2              | Interatomic distance (Å) | Clash overlap (Å) |
|-------------------|---------------------|--------------------------|-------------------|
| 3:C:343:PHE:HB2   | 3:C:349:THR:HG22    | 1.88                     | 0.55              |
| 6:F:345:GLU:O     | 6:F:347:CYS:N       | 2.39                     | 0.55              |
| 2:B:176:LYS:HD3   | 2:B:210:TYR:CD2     | 2.42                     | 0.55              |
| 2:B:250:ALA:HB3   | 11:X:507:COL:C14    | 2.37                     | 0.55              |
| 2:B:370:GLY:C     | 2:B:371:LEU:HD22    | 2.27                     | 0.55              |
| 6:F:263:PHE:HE1   | 6:F:341:LYS:CD      | 2.18                     | 0.55              |
| 6:F:320:MET:HB2   | 6:F:330:ILE:HD11    | 1.89                     | 0.55              |
| 2:B:227:LEU:O     | 2:B:231:VAL:HG23    | 2.05                     | 0.55              |
| 2:B:234:THR:O     | 2:B:238[A]:VAL:HG13 | 2.07                     | 0.55              |
| 4:D:270:PRO:HG2   | 4:D:302:MET:HB2     | 1.89                     | 0.55              |
| 2:B:288:VAL:CG2   | 2:B:323:MET:HE2     | 2.35                     | 0.54              |
| 4:D:136:GLN:HA    | 4:D:167:ASN:O       | 2.06                     | 0.54              |
| 6:F:161:LEU:HB2   | 6:F:172:PHE:CD2     | 2.41                     | 0.54              |
| 6:F:233:PHE:O     | 6:F:236:LYS:HG3     | 2.07                     | 0.54              |
| 6:F:191:LEU:HD12  | 6:F:197:ARG:O       | 2.06                     | 0.54              |
| 6:F:253:TYR:HB2   | 6:F:256:TYR:CZ      | 2.43                     | 0.54              |
| 1:A:76:ASP:O      | 1:A:80[A]:THR:HG22  | 2.08                     | 0.54              |
| 4:D:74:THR:O      | 4:D:78:VAL:HG23     | 2.07                     | 0.54              |
| 4:D:276:THR:H     | 10:X:512:EPA:C25    | 2.20                     | 0.54              |
| 4:D:297:ASP:OD2   | 4:D:299:LYS:HG2     | 2.08                     | 0.54              |
| 6:F:135:TYR:OH    | 6:F:164:SER:O       | 2.24                     | 0.54              |
| 2:B:284:ARG:NH2   | 2:B:290:GLU:OE2     | 2.40                     | 0.54              |
| 2:B:295[B]:MET:CG | 2:B:377:PHE:HB2     | 2.38                     | 0.54              |
| 2:B:298:SER:HB2   | 2:B:307:PRO:HD2     | 1.88                     | 0.54              |
| 4:D:414:ASP:OD2   | 4:D:414:ASP:N       | 2.41                     | 0.54              |
| 1:A:36:MET:HB3    | 1:A:61:HIS:NE2      | 2.23                     | 0.53              |
| 1:A:206:ASN:OD1   | 1:A:209[B]:ILE:HD11 | 2.08                     | 0.53              |
| 1:A:221:ARG:NH2   | 2:B:325:MET:HE2     | 1.98                     | 0.53              |
| 3:C:1:MET:HG2     | 3:C:2:ARG:CZ        | 2.37                     | 0.53              |
| 2:B:269:MET:CE    | 2:B:305:CYS:HB2     | 2.39                     | 0.53              |
| 6:F:131:PHE:CE1   | 6:F:182:ILE:CG2     | 2.87                     | 0.53              |
| 3:C:209:ILE:HD11  | 3:C:302[A]:MET:SD   | 2.48                     | 0.53              |
| 6:F:225:SER:H     | 6:F:246:GLN:NE2     | 2.06                     | 0.53              |
| 3:C:31:GLN:HB3    | 3:C:32:PRO:HD2      | 1.90                     | 0.53              |
| 1:A:221:ARG:NH2   | 2:B:325:MET:CE      | 2.64                     | 0.53              |
| 6:F:224:SER:OG    | 6:F:238:CYS:HA      | 2.08                     | 0.53              |
| 3:C:234:ILE:HG12  | 3:C:302[B]:MET:SD   | 2.49                     | 0.53              |
| 6:F:138:ARG:C     | 6:F:145:ASN:HD21    | 2.11                     | 0.53              |
| 1:A:97:GLU:OE1    | 2:B:1:MET:CE        | 2.57                     | 0.53              |
| 6:F:278:THR:O     | 6:F:282:SER:OG      | 2.26                     | 0.53              |
| 1:A:154:MET:HE2   | 1:A:154:MET:CA      | 2.35                     | 0.52              |

Continued on next page...

Continued from previous page...

| Atom-1              | Atom-2              | Interatomic distance (Å) | Clash overlap (Å) |
|---------------------|---------------------|--------------------------|-------------------|
| 2:B:278:ARG:NH1     | 2:B:278:ARG:HG3     | 2.25                     | 0.52              |
| 2:B:1:MET:SD        | 2:B:133:GLN:HG3     | 2.49                     | 0.52              |
| 6:F:160:ILE:HD12    | 6:F:160:ILE:N       | 2.24                     | 0.52              |
| 6:F:259:GLY:O       | 6:F:261:GLU:HG3     | 2.09                     | 0.52              |
| 1:A:209[A]:ILE:HG22 | 1:A:227:LEU:CD2     | 2.38                     | 0.52              |
| 6:F:191:LEU:HA      | 6:F:197:ARG:O       | 2.10                     | 0.52              |
| 1:A:275:VAL:HG13    | 1:A:368:LEU:HD21    | 1.92                     | 0.52              |
| 6:F:161:LEU:HB2     | 6:F:172:PHE:CE2     | 2.45                     | 0.52              |
| 2:B:286:LEU:HD11    | 10:X:506:EPA:S      | 2.50                     | 0.51              |
| 6:F:199:PHE:O       | 6:F:320:MET:HE3     | 2.10                     | 0.51              |
| 6:F:206:LEU:HD21    | 6:F:354:ALA:HB2     | 1.93                     | 0.51              |
| 2:B:55:GLU:HG2      | 2:B:61:TYR:CE1      | 2.45                     | 0.51              |
| 3:C:301:GLN:HE22    | 3:C:307:PRO:HG2     | 1.75                     | 0.51              |
| 4:D:143:GLY:O       | 4:D:147[B]:SER:OG   | 2.28                     | 0.51              |
| 4:D:181:VAL:HB      | 4:D:398:MET:HE1     | 1.92                     | 0.51              |
| 6:F:173:ILE:HD13    | 6:F:180:HIS:CB      | 2.40                     | 0.51              |
| 3:C:1:MET:HG2       | 3:C:2:ARG:NH2       | 2.26                     | 0.51              |
| 3:C:75:ILE:HD12     | 3:C:94:THR:CG2      | 2.40                     | 0.51              |
| 4:D:165:ILE:HG21    | 4:D:252:LEU:HB3     | 1.91                     | 0.51              |
| 6:F:32:LYS:HD3      | 6:F:32:LYS:H        | 1.74                     | 0.51              |
| 6:F:280:GLU:HG2     | 6:F:284[B]:LEU:HD12 | 1.93                     | 0.51              |
| 1:A:39:ASP:OD2      | 1:A:61:HIS:HE1      | 1.94                     | 0.51              |
| 1:A:93:ILE:HD11     | 1:A:121:ARG:HG3     | 1.93                     | 0.51              |
| 6:F:245:ILE:HA      | 6:F:248:GLU:HB3     | 1.93                     | 0.51              |
| 6:F:21:LEU:O        | 6:F:24:THR:HG23     | 2.10                     | 0.51              |
| 3:C:343:PHE:CG      | 3:C:349:THR:HG22    | 2.46                     | 0.51              |
| 4:D:319:PHE:HB2     | 4:D:355:VAL:HG22    | 1.93                     | 0.51              |
| 2:B:220:THR:O       | 2:B:222:PRO:HD3     | 2.11                     | 0.50              |
| 6:F:220[B]:VAL:HG23 | 6:F:263:PHE:CE2     | 2.46                     | 0.50              |
| 3:C:9:VAL:HG22      | 3:C:68[B]:VAL:CG1   | 2.41                     | 0.50              |
| 4:D:191:VAL:CG1     | 4:D:425:MET:HE3     | 2.41                     | 0.50              |
| 3:C:34:GLY:HA3      | 3:C:60:LYS:HG3      | 1.92                     | 0.50              |
| 5:E:111:ASN:N       | 5:E:111:ASN:HD22    | 2.09                     | 0.50              |
| 2:B:250:ALA:HB1     | 11:X:507:COL:C12    | 2.41                     | 0.50              |
| 6:F:241:THR:N       | 13:X:515:ACP:O3'    | 2.45                     | 0.50              |
| 1:A:245:ASP:O       | 5:E:16:SER:HB2      | 2.11                     | 0.49              |
| 1:A:285:GLN:HG3     | 1:A:372[B]:GLN:CD   | 2.32                     | 0.49              |
| 2:B:171:VAL:HA      | 2:B:204:ILE:O       | 2.12                     | 0.49              |
| 3:C:241:SER:HA      | 3:C:249:ASN:HD21    | 1.77                     | 0.49              |
| 4:D:143:GLY:HA3     | 12:X:513:GDP:O3A    | 2.12                     | 0.49              |
| 4:D:191:VAL:HG11    | 4:D:425:MET:CE      | 2.42                     | 0.49              |

Continued on next page...

Continued from previous page...

| Atom-1           | Atom-2             | Interatomic distance (Å) | Clash overlap (Å) |
|------------------|--------------------|--------------------------|-------------------|
| 4:D:284:ARG:NH2  | 4:D:294:GLN:HE22   | 1.90                     | 0.49              |
| 6:F:244:CYS:O    | 6:F:246:GLN:N      | 2.45                     | 0.49              |
| 2:B:387:LEU:O    | 2:B:391:ILE:HD12   | 2.12                     | 0.49              |
| 3:C:351:PHE:CD1  | 3:C:351:PHE:N      | 2.81                     | 0.49              |
| 4:D:74:THR:O     | 4:D:75:MET:C       | 2.50                     | 0.49              |
| 2:B:1:MET:HE3    | 2:B:253:ARG:HH11   | 1.78                     | 0.49              |
| 2:B:274:PRO:HB3  | 2:B:286:LEU:HD22   | 1.95                     | 0.49              |
| 1:A:7:ILE:HG23   | 1:A:66[B]:VAL:HG23 | 1.94                     | 0.49              |
| 1:A:67:PHE:HB2   | 1:A:92:LEU:HD23    | 1.95                     | 0.49              |
| 3:C:221:ARG:HG3  | 4:D:325:MET:HB3    | 1.94                     | 0.49              |
| 6:F:1:MET:CE     | 6:F:28:LYS:HG2     | 2.42                     | 0.49              |
| 6:F:287:ILE:HG23 | 6:F:319:PHE:CZ     | 2.48                     | 0.49              |
| 2:B:305:CYS:O    | 2:B:306:ASP:C      | 2.51                     | 0.48              |
| 6:F:189:PRO:O    | 6:F:191:LEU:HD22   | 2.13                     | 0.48              |
| 2:B:1:MET:CE     | 2:B:253:ARG:NH1    | 2.76                     | 0.48              |
| 2:B:36:TYR:CD1   | 2:B:37:HIS:N       | 2.81                     | 0.48              |
| 3:C:172:TYR:CE2  | 3:C:391:LEU:HD22   | 2.48                     | 0.48              |
| 6:F:172:PHE:CD1  | 6:F:172:PHE:C      | 2.87                     | 0.48              |
| 3:C:75:ILE:HD12  | 3:C:94:THR:HG22    | 1.94                     | 0.48              |
| 4:D:74:THR:HA    | 4:D:77:SER:OG      | 2.13                     | 0.48              |
| 6:F:172:PHE:HE1  | 6:F:176:GLN:OE1    | 1.95                     | 0.48              |
| 3:C:270:ALA:C    | 3:C:302[B]:MET:HG3 | 2.34                     | 0.48              |
| 6:F:163:SER:OG   | 6:F:169:LEU:HG     | 2.13                     | 0.48              |
| 3:C:1:MET:CG     | 3:C:2:ARG:CZ       | 2.91                     | 0.48              |
| 4:D:11:GLN:O     | 4:D:15:GLN:HG2     | 2.13                     | 0.48              |
| 4:D:75:MET:HG3   | 4:D:92:PHE:HD2     | 1.78                     | 0.48              |
| 6:F:216:TYR:CE1  | 6:F:374:ILE:HD13   | 2.49                     | 0.48              |
| 6:F:226:GLU:HG3  | 6:F:237:THR:HG21   | 1.95                     | 0.48              |
| 2:B:36:TYR:HE1   | 2:B:38:GLY:CA      | 2.27                     | 0.48              |
| 6:F:40:MET:SD    | 6:F:52:LEU:HD21    | 2.53                     | 0.48              |
| 2:B:36:TYR:HD1   | 2:B:37:HIS:N       | 2.12                     | 0.48              |
| 6:F:3:THR:HB     | 6:F:30:LEU:HD12    | 1.94                     | 0.48              |
| 2:B:6:HIS:CD2    | 2:B:21:TRP:HE1     | 2.32                     | 0.47              |
| 6:F:90:SER:O     | 6:F:91:CYS:C       | 2.52                     | 0.47              |
| 6:F:162:ILE:HB   | 6:F:233:PHE:HD2    | 1.78                     | 0.47              |
| 2:B:172:MET:HG3  | 2:B:387:LEU:HD21   | 1.95                     | 0.47              |
| 3:C:93:ILE:HD11  | 3:C:121:ARG:HG3    | 1.96                     | 0.47              |
| 6:F:226:GLU:HG3  | 6:F:237:THR:CG2    | 2.44                     | 0.47              |
| 6:F:263:PHE:CE1  | 6:F:341:LYS:HE3    | 2.50                     | 0.47              |
| 4:D:149:MET:HB3  | 4:D:149:MET:HE2    | 1.74                     | 0.47              |
| 4:D:402:LYS:CE   | 4:D:415:GLU:OE2    | 2.63                     | 0.47              |

Continued on next page...

Continued from previous page...

| Atom-1             | Atom-2              | Interatomic distance (Å) | Clash overlap (Å) |
|--------------------|---------------------|--------------------------|-------------------|
| 6:F:199:PHE:O      | 6:F:320:MET:CE      | 2.62                     | 0.47              |
| 1:A:63:PRO:HD3     | 1:A:86:LEU:HG       | 1.95                     | 0.47              |
| 6:F:34:ASN:HD22    | 6:F:35:PRO:N        | 2.12                     | 0.47              |
| 2:B:1:MET:HE1      | 2:B:253:ARG:HH12    | 1.79                     | 0.47              |
| 2:B:322:ARG:HH11   | 2:B:322:ARG:HB2     | 1.80                     | 0.47              |
| 6:F:126:ASP:OD1    | 6:F:127:GLU:N       | 2.47                     | 0.47              |
| 1:A:51[B]:THR:HG22 | 1:A:52:PHE:CD1      | 2.49                     | 0.47              |
| 6:F:32:LYS:H       | 6:F:32:LYS:CD       | 2.27                     | 0.47              |
| 6:F:148:ILE:HG12   | 6:F:149:ALA:N       | 2.29                     | 0.47              |
| 6:F:333:ASN:HB3    | 14:S:40:HOH:O       | 2.15                     | 0.47              |
| 1:A:103:TYR:CE1    | 1:A:148:GLY:HA2     | 2.50                     | 0.47              |
| 3:C:190:THR:O      | 3:C:194[B]:THR:HG23 | 2.15                     | 0.47              |
| 5:E:138:GLU:O      | 5:E:139:LEU:HD23    | 2.15                     | 0.47              |
| 6:F:138:ARG:HB2    | 6:F:145:ASN:OD1     | 2.14                     | 0.47              |
| 2:B:306:ASP:HB3    | 2:B:309:HIS:CE1     | 2.50                     | 0.46              |
| 2:B:7:ILE:O        | 2:B:137:LEU:HA      | 2.16                     | 0.46              |
| 3:C:276:ILE:HD13   | 3:C:369:ALA:HB3     | 1.97                     | 0.46              |
| 5:E:9:ILE:HG12     | 5:E:21:GLU:HB3      | 1.97                     | 0.46              |
| 1:A:132:LEU:O      | 1:A:164:LYS:NZ      | 2.32                     | 0.46              |
| 2:B:42:LEU:HD22    | 2:B:245:PRO:HD2     | 1.97                     | 0.46              |
| 3:C:204:VAL:HG22   | 3:C:302[B]:MET:HE1  | 1.91                     | 0.46              |
| 4:D:141:LEU:HA     | 4:D:147[B]:SER:HB3  | 1.97                     | 0.46              |
| 6:F:258:GLU:H      | 6:F:258:GLU:CD      | 2.17                     | 0.46              |
| 1:A:56:THR:HG22    | 1:A:57:GLY:N        | 2.30                     | 0.46              |
| 2:B:163:ASP:O      | 2:B:253:ARG:NH2     | 2.46                     | 0.46              |
| 4:D:269:MET:HG3    | 4:D:303:ALA:HB3     | 1.97                     | 0.46              |
| 1:A:438:ASP:O      | 1:A:439:SER:C       | 2.54                     | 0.46              |
| 2:B:302:MET:HE3    | 2:B:302:MET:HB3     | 1.86                     | 0.46              |
| 4:D:288:VAL:HB     | 4:D:289:PRO:HD3     | 1.97                     | 0.46              |
| 6:F:100:ILE:HD13   | 6:F:126:ASP:OD1     | 2.15                     | 0.46              |
| 2:B:275:LEU:HA     | 10:X:506:EPA:O4     | 2.15                     | 0.46              |
| 4:D:20:PHE:CZ      | 4:D:24:ILE:HD13     | 2.51                     | 0.46              |
| 3:C:343:PHE:CB     | 3:C:349:THR:HG22    | 2.46                     | 0.46              |
| 6:F:237:THR:HG21   | 6:F:251:LYS:HD3     | 1.98                     | 0.46              |
| 6:F:148:ILE:HG13   | 6:F:160:ILE:HG23    | 1.97                     | 0.46              |
| 1:A:21:TRP:CZ3     | 1:A:63:PRO:HB3      | 2.51                     | 0.46              |
| 1:A:156:ARG:HD2    | 1:A:156:ARG:HA      | 1.78                     | 0.45              |
| 2:B:272:PHE:O      | 2:B:300:ASN:OD1     | 2.35                     | 0.45              |
| 4:D:404:PHE:O      | 4:D:405:LEU:C       | 2.54                     | 0.45              |
| 2:B:16[B]:ILE:HD13 | 2:B:231:VAL:HG11    | 1.99                     | 0.45              |
| 4:D:172:MET:HA     | 4:D:173:PRO:HD3     | 1.86                     | 0.45              |

Continued on next page...

Continued from previous page...

| Atom-1              | Atom-2            | Interatomic distance (Å) | Clash overlap (Å) |
|---------------------|-------------------|--------------------------|-------------------|
| 2:B:347:ILE:HG22    | 2:B:350:ASN:HB3   | 1.97                     | 0.45              |
| 2:B:133:GLN:OE1     | 2:B:252:LEU:HG    | 2.16                     | 0.45              |
| 4:D:68:VAL:HG12     | 4:D:149:MET:HE1   | 1.99                     | 0.45              |
| 5:E:81:GLU:O        | 5:E:84[B]:GLN:HG2 | 2.16                     | 0.45              |
| 6:F:13:VAL:HG21     | 6:F:336:PRO:O     | 2.16                     | 0.45              |
| 6:F:34:ASN:HD22     | 6:F:34:ASN:C      | 2.20                     | 0.45              |
| 2:B:269:MET:HE3     | 2:B:305:CYS:HB2   | 1.98                     | 0.45              |
| 3:C:69:ASP:O        | 3:C:94:THR:HA     | 2.17                     | 0.45              |
| 6:F:148:ILE:CG1     | 6:F:149:ALA:N     | 2.80                     | 0.45              |
| 6:F:284[A]:LEU:HD12 | 6:F:284[A]:LEU:HA | 1.76                     | 0.45              |
| 3:C:213:CYS:O       | 3:C:217:LEU:HB2   | 2.17                     | 0.45              |
| 4:D:69:ASP:O        | 4:D:94:PHE:HA     | 2.17                     | 0.45              |
| 6:F:103:THR:HG23    | 6:F:174:ASP:OD2   | 2.17                     | 0.45              |
| 4:D:172:MET:HG3     | 4:D:387:LEU:HD21  | 1.99                     | 0.45              |
| 6:F:148:ILE:HG22    | 6:F:183:GLN:O     | 2.15                     | 0.45              |
| 6:F:2:TYR:CE1       | 6:F:359:PHE:HB3   | 2.52                     | 0.44              |
| 4:D:1:MET:HG3       | 4:D:50:ASN:HB2    | 1.96                     | 0.44              |
| 4:D:123:ARG:NH1     | 4:D:160:GLU:OE2   | 2.50                     | 0.44              |
| 2:B:2:ARG:HG2       | 2:B:50[B]:ASN:OD1 | 2.16                     | 0.44              |
| 4:D:312:TYR:CE1     | 4:D:377:PHE:HZ    | 2.35                     | 0.44              |
| 4:D:288:VAL:HG12    | 4:D:331:GLN:HG3   | 1.98                     | 0.44              |
| 6:F:184:LYS:HD2     | 6:F:184:LYS:C     | 2.37                     | 0.44              |
| 1:A:137:VAL:HG21    | 1:A:154:MET:CE    | 2.47                     | 0.44              |
| 1:A:308:ARG:HH21    | 6:F:301:ALA:C     | 2.21                     | 0.44              |
| 4:D:294:GLN:CG      | 4:D:300:ASN:ND2   | 2.80                     | 0.44              |
| 1:A:115:ILE:O       | 1:A:119:LEU:HD22  | 2.17                     | 0.44              |
| 3:C:406:HIS:CG      | 4:D:263:PRO:HD3   | 2.52                     | 0.44              |
| 6:F:159:GLY:C       | 6:F:160:ILE:HD12  | 2.37                     | 0.44              |
| 6:F:338:CYS:SG      | 6:F:339:ALA:N     | 2.90                     | 0.44              |
| 3:C:147:SER:HB2     | 3:C:190:THR:HB    | 1.99                     | 0.44              |
| 6:F:131:PHE:C       | 6:F:131:PHE:CD2   | 2.91                     | 0.44              |
| 1:A:154:MET:CE      | 1:A:157:LEU:HD12  | 2.48                     | 0.44              |
| 1:A:415:GLU:O       | 1:A:418:PHE:HB2   | 2.17                     | 0.44              |
| 2:B:36:TYR:CZ       | 2:B:46:LEU:CD1    | 2.99                     | 0.44              |
| 3:C:306:ASP:OD1     | 3:C:308:ARG:HG3   | 2.18                     | 0.43              |
| 6:F:100:ILE:HD13    | 6:F:100:ILE:HA    | 1.83                     | 0.43              |
| 6:F:101:TYR:HD1     | 6:F:179:VAL:HG22  | 1.82                     | 0.43              |
| 1:A:430:LYS:HD3     | 1:A:434:GLU:OE1   | 2.18                     | 0.43              |
| 5:E:75:LYS:HE3      | 5:E:75:LYS:HB3    | 1.42                     | 0.43              |
| 1:A:115:ILE:HG13    | 1:A:119:LEU:CD2   | 2.48                     | 0.43              |
| 2:B:295[B]:MET:HG2  | 2:B:377:PHE:HB2   | 1.99                     | 0.43              |

Continued on next page...

Continued from previous page...

| Atom-1              | Atom-2             | Interatomic distance (Å) | Clash overlap (Å) |
|---------------------|--------------------|--------------------------|-------------------|
| 6:F:26:GLN:HB2      | 6:F:361:LEU:HD12   | 2.00                     | 0.43              |
| 1:A:279:GLU:HA      | 1:A:279:GLU:OE1    | 2.18                     | 0.43              |
| 6:F:298[B]:ILE:HG12 | 6:F:298[B]:ILE:O   | 2.17                     | 0.43              |
| 1:A:147:SER:HB2     | 1:A:190:THR:HB     | 2.01                     | 0.43              |
| 2:B:40:SER:OG       | 2:B:42:LEU:HB2     | 2.19                     | 0.43              |
| 2:B:141:LEU:CD1     | 2:B:172:MET:CE     | 2.97                     | 0.43              |
| 4:D:397:ALA:O       | 4:D:401:ARG:NH1    | 2.51                     | 0.43              |
| 1:A:336:LYS:HG3     | 5:E:24:LEU:CD1     | 2.48                     | 0.43              |
| 2:B:75:MET:HE2      | 2:B:75:MET:HB2     | 1.81                     | 0.43              |
| 2:B:385:GLN:HE22    | 2:B:433:GLN:HE22   | 1.65                     | 0.43              |
| 3:C:298:PRO:HA      | 3:C:301:GLN:NE2    | 2.33                     | 0.43              |
| 4:D:294:GLN:CG      | 4:D:300:ASN:HD22   | 2.32                     | 0.43              |
| 6:F:280:GLU:HA      | 6:F:284[B]:LEU:HB2 | 1.99                     | 0.43              |
| 6:F:325:LEU:HD23    | 6:F:325:LEU:HA     | 1.67                     | 0.43              |
| 2:B:31:ASP:OD1      | 2:B:35:SER:O       | 2.36                     | 0.43              |
| 2:B:1:MET:HE1       | 2:B:253:ARG:NH1    | 2.34                     | 0.43              |
| 4:D:103:TRP:HD1     | 4:D:147[A]:SER:OG  | 2.02                     | 0.43              |
| 6:F:226:GLU:CG      | 6:F:237:THR:HG23   | 2.49                     | 0.43              |
| 2:B:103:TRP:CE3     | 2:B:189:LEU:HD13   | 2.54                     | 0.43              |
| 2:B:141:LEU:HD12    | 2:B:172:MET:CE     | 2.49                     | 0.43              |
| 6:F:247:LYS:HZ1     | 6:F:259:GLY:HA2    | 1.84                     | 0.43              |
| 3:C:230:LEU:O       | 3:C:234:ILE:HD12   | 2.19                     | 0.42              |
| 3:C:209:ILE:HD11    | 3:C:302[A]:MET:HG3 | 2.02                     | 0.42              |
| 4:D:38:GLY:HA3      | 4:D:45:GLN:OE1     | 2.19                     | 0.42              |
| 6:F:279:LEU:HG      | 6:F:284[B]:LEU:HG  | 2.00                     | 0.42              |
| 1:A:172:TYR:HB3     | 1:A:205:ASP:HA     | 2.00                     | 0.42              |
| 4:D:20:PHE:CD1      | 4:D:235:MET:HE2    | 2.54                     | 0.42              |
| 6:F:263:PHE:CE1     | 6:F:341:LYS:HD3    | 2.36                     | 0.42              |
| 2:B:1:MET:HE3       | 2:B:253:ARG:NH1    | 2.34                     | 0.42              |
| 4:D:7:ILE:O         | 4:D:137:LEU:HA     | 2.19                     | 0.42              |
| 6:F:184:LYS:HD2     | 6:F:185:TYR:H      | 1.79                     | 0.42              |
| 1:A:63:PRO:CD       | 1:A:86:LEU:HG      | 2.50                     | 0.42              |
| 5:E:47:LEU:HD23     | 5:E:47:LEU:O       | 2.20                     | 0.42              |
| 6:F:239:HIS:O       | 6:F:240:LEU:C      | 2.58                     | 0.42              |
| 2:B:48:ARG:HH21     | 2:B:245:PRO:HA     | 1.84                     | 0.42              |
| 2:B:229:HIS:ND1     | 10:X:506:EPA:C6    | 2.83                     | 0.42              |
| 4:D:71:GLU:HG2      | 4:D:98:GLY:HA2     | 2.00                     | 0.42              |
| 6:F:376:ILE:HG22    | 6:F:378:LEU:CD1    | 2.50                     | 0.42              |
| 4:D:218:LYS:O       | 4:D:219:LEU:HD23   | 2.20                     | 0.42              |
| 6:F:5:VAL:HG12      | 6:F:7:ARG:HG3      | 2.02                     | 0.42              |
| 6:F:304:THR:HG22    | 6:F:307:LEU:HD12   | 2.01                     | 0.42              |

Continued on next page...

Continued from previous page...

| Atom-1              | Atom-2              | Interatomic distance (Å) | Clash overlap (Å) |
|---------------------|---------------------|--------------------------|-------------------|
| 6:F:279:LEU:O       | 6:F:284[B]:LEU:HG   | 2.20                     | 0.42              |
| 6:F:340:GLN:CD      | 6:F:340:GLN:H       | 2.23                     | 0.42              |
| 2:B:287:THR:HG22    | 2:B:290:GLU:OE1     | 2.20                     | 0.42              |
| 3:C:276:ILE:HD11    | 3:C:371:VAL:CG1     | 2.49                     | 0.42              |
| 4:D:123:ARG:NH1     | 4:D:160:GLU:CD      | 2.73                     | 0.42              |
| 4:D:282:GLN:HG3     | 4:D:283:TYR:CG      | 2.55                     | 0.42              |
| 1:A:7:ILE:HA        | 1:A:66[B]:VAL:HG23  | 2.02                     | 0.42              |
| 2:B:13:GLY:CA       | 2:B:138[B]:THR:HG22 | 2.35                     | 0.42              |
| 2:B:270:PRO:HG2     | 2:B:302:MET:HB2     | 2.02                     | 0.42              |
| 2:B:305:CYS:SG      | 2:B:387:LEU:HB2     | 2.60                     | 0.42              |
| 6:F:101:TYR:CD1     | 6:F:179:VAL:HG22    | 2.54                     | 0.42              |
| 2:B:112:ALA:O       | 2:B:115:VAL:HG12    | 2.20                     | 0.41              |
| 1:A:56:THR:CG2      | 1:A:57:GLY:N        | 2.83                     | 0.41              |
| 1:A:177:VAL:HG12    | 1:A:178:SER:N       | 2.35                     | 0.41              |
| 1:A:357:TYR:CD2     | 5:E:17:GLY:HA2      | 2.55                     | 0.41              |
| 4:D:109:THR:O       | 4:D:113:GLU:HG3     | 2.20                     | 0.41              |
| 4:D:110:GLU:O       | 4:D:113:GLU:HB2     | 2.20                     | 0.41              |
| 6:F:195:GLY:C       | 6:F:197:ARG:HG3     | 2.40                     | 0.41              |
| 2:B:165:ILE:HG21    | 2:B:252:LEU:HB3     | 2.03                     | 0.41              |
| 2:B:2:ARG:HB2       | 2:B:2:ARG:NH1       | 2.35                     | 0.41              |
| 3:C:302[B]:MET:HE3  | 3:C:302[B]:MET:HB3  | 1.94                     | 0.41              |
| 5:E:58:GLU:HA       | 5:E:61:ARG:NH2      | 2.35                     | 0.41              |
| 6:F:298[B]:ILE:HG12 | 6:F:302:ILE:HG23    | 2.02                     | 0.41              |
| 1:A:51[B]:THR:HG22  | 1:A:52:PHE:HD1      | 1.86                     | 0.41              |
| 1:A:195:LEU:HD12    | 1:A:195:LEU:HA      | 1.79                     | 0.41              |
| 1:A:285:GLN:OE1     | 1:A:285:GLN:CA      | 2.68                     | 0.41              |
| 2:B:12:CYS:HB2      | 12:X:508:GDP:C8     | 2.56                     | 0.41              |
| 6:F:305:LYS:HD3     | 6:F:305:LYS:HA      | 1.72                     | 0.41              |
| 6:F:330:ILE:HG21    | 13:X:515:ACP:C5'    | 2.47                     | 0.41              |
| 2:B:36:TYR:CE1      | 2:B:38:GLY:CA       | 3.03                     | 0.41              |
| 4:D:108:TYR:O       | 5:E:134:ARG:HD3     | 2.20                     | 0.41              |
| 4:D:173:PRO:HG2     | 4:D:187:ALA:HB2     | 2.02                     | 0.41              |
| 4:D:150:GLY:O       | 4:D:154:ILE:HG13    | 2.21                     | 0.41              |
| 6:F:155:ALA:O       | 6:F:156:LYS:C       | 2.59                     | 0.41              |
| 6:F:263:PHE:CD1     | 6:F:341:LYS:HE3     | 2.55                     | 0.41              |
| 3:C:249:ASN:CG      | 3:C:356[A]:ASN:ND2  | 2.74                     | 0.41              |
| 6:F:88:SER:C        | 6:F:90:SER:N        | 2.74                     | 0.41              |
| 6:F:231:ALA:O       | 6:F:233:PHE:HD1     | 2.04                     | 0.40              |
| 2:B:36:TYR:HD1      | 2:B:37:HIS:H        | 1.68                     | 0.40              |
| 2:B:67:LEU:N        | 2:B:67:LEU:HD12     | 2.35                     | 0.40              |
| 3:C:36:MET:HB3      | 3:C:61:HIS:CE1      | 2.56                     | 0.40              |

Continued on next page...

Continued from previous page...

| Atom-1           | Atom-2            | Interatomic distance (Å) | Clash overlap (Å) |
|------------------|-------------------|--------------------------|-------------------|
| 4:D:73:GLY:O     | 4:D:75:MET:N      | 2.53                     | 0.40              |
| 4:D:118:VAL:HG11 | 4:D:153:LEU:HD21  | 2.02                     | 0.40              |
| 6:F:321:VAL:HG22 | 6:F:322:ASP:N     | 2.35                     | 0.40              |
| 3:C:188:ILE:HG13 | 3:C:425:MET:HG3   | 2.03                     | 0.40              |
| 6:F:34:ASN:ND2   | 6:F:36:ARG:H      | 2.20                     | 0.40              |
| 6:F:2:TYR:CZ     | 6:F:359:PHE:HB3   | 2.56                     | 0.40              |
| 6:F:241:THR:HG23 | 13:X:515:ACP:O3'  | 2.21                     | 0.40              |
| 6:F:242:ASN:ND2  | 6:F:245:ILE:HB    | 2.36                     | 0.40              |
| 3:C:270:ALA:HB3  | 3:C:302[B]:MET:CG | 2.50                     | 0.40              |

All (2) symmetry-related close contacts are listed below. The label for Atom-2 includes the symmetry operator and encoded unit-cell translations to be applied.

| Atom-1          | Atom-2                 | Interatomic distance (Å) | Clash overlap (Å) |
|-----------------|------------------------|--------------------------|-------------------|
| 2:B:113:GLU:OE1 | 3:C:283:HIS:NE2[4_555] | 1.57                     | 0.63              |
| 2:B:411:GLU:OE1 | 3:C:282:TYR:OH[4_555]  | 2.08                     | 0.12              |

### 5.3 Torsion angles [i](#)

#### 5.3.1 Protein backbone [i](#)

In the following table, the Percentiles column shows the percent Ramachandran outliers of the chain as a percentile score with respect to all X-ray entries followed by that with respect to entries of similar resolution.

The Analysed column shows the number of residues for which the backbone conformation was analysed, and the total number of residues.

| Mol | Chain | Analysed         | Favoured   | Allowed | Outliers | Percentiles |
|-----|-------|------------------|------------|---------|----------|-------------|
| 1   | A     | 449/439 (102%)   | 432 (96%)  | 16 (4%) | 1 (0%)   | 47 78       |
| 2   | B     | 441/428 (103%)   | 429 (97%)  | 12 (3%) | 0        | 100 100     |
| 3   | C     | 456/440 (104%)   | 448 (98%)  | 8 (2%)  | 0        | 100 100     |
| 4   | D     | 435/431 (101%)   | 419 (96%)  | 16 (4%) | 0        | 100 100     |
| 5   | E     | 124/123 (101%)   | 121 (98%)  | 3 (2%)  | 0        | 100 100     |
| 6   | F     | 353/351 (101%)   | 322 (91%)  | 29 (8%) | 2 (1%)   | 25 56       |
| All | All   | 2258/2212 (102%) | 2171 (96%) | 84 (4%) | 3 (0%)   | 51 81       |

All (3) Ramachandran outliers are listed below:

| Mol | Chain | Res | Type |
|-----|-------|-----|------|
| 6   | F     | 248 | GLU  |
| 6   | F     | 346 | LEU  |
| 1   | A     | 177 | VAL  |

### 5.3.2 Protein sidechains [i](#)

In the following table, the Percentiles column shows the percent sidechain outliers of the chain as a percentile score with respect to all X-ray entries followed by that with respect to entries of similar resolution.

The Analysed column shows the number of residues for which the sidechain conformation was analysed, and the total number of residues.

| Mol | Chain | Analysed         | Rotameric  | Outliers | Percentiles |    |
|-----|-------|------------------|------------|----------|-------------|----|
| 1   | A     | 381/370 (103%)   | 378 (99%)  | 3 (1%)   | 81          | 94 |
| 2   | B     | 385/370 (104%)   | 369 (96%)  | 16 (4%)  | 30          | 63 |
| 3   | C     | 389/371 (105%)   | 384 (99%)  | 5 (1%)   | 69          | 91 |
| 4   | D     | 378/372 (102%)   | 371 (98%)  | 7 (2%)   | 57          | 85 |
| 5   | E     | 115/110 (104%)   | 107 (93%)  | 8 (7%)   | 15          | 40 |
| 6   | F     | 319/313 (102%)   | 292 (92%)  | 27 (8%)  | 10          | 31 |
| All | All   | 1967/1906 (103%) | 1901 (97%) | 66 (3%)  | 39          | 71 |

All (66) residues with a non-rotameric sidechain are listed below:

| Mol | Chain | Res    | Type |
|-----|-------|--------|------|
| 1   | A     | 71     | GLU  |
| 1   | A     | 251    | ASP  |
| 1   | A     | 438    | ASP  |
| 2   | B     | 36     | TYR  |
| 2   | B     | 130    | ASP  |
| 2   | B     | 139    | HIS  |
| 2   | B     | 196[A] | GLU  |
| 2   | B     | 196[B] | GLU  |
| 2   | B     | 276    | THR  |
| 2   | B     | 278    | ARG  |
| 2   | B     | 282    | GLN  |
| 2   | B     | 299    | LYS  |
| 2   | B     | 302    | MET  |
| 2   | B     | 372    | LYS  |
| 2   | B     | 416    | MET  |
| 2   | B     | 423[A] | SER  |

*Continued on next page...*

Continued from previous page...

| Mol | Chain | Res    | Type |
|-----|-------|--------|------|
| 2   | B     | 423[B] | SER  |
| 2   | B     | 431[A] | GLU  |
| 2   | B     | 431[B] | GLU  |
| 3   | C     | 71     | GLU  |
| 3   | C     | 163    | LYS  |
| 3   | C     | 181    | VAL  |
| 3   | C     | 221    | ARG  |
| 3   | C     | 347    | CYS  |
| 4   | D     | 75     | MET  |
| 4   | D     | 128    | SER  |
| 4   | D     | 139    | HIS  |
| 4   | D     | 298    | SER  |
| 4   | D     | 325    | MET  |
| 4   | D     | 369    | ARG  |
| 4   | D     | 414    | ASP  |
| 5   | E     | 6      | MET  |
| 5   | E     | 13     | LYS  |
| 5   | E     | 75     | LYS  |
| 5   | E     | 77     | GLU  |
| 5   | E     | 88     | GLU  |
| 5   | E     | 108[A] | ASN  |
| 5   | E     | 108[B] | ASN  |
| 5   | E     | 111    | ASN  |
| 6   | F     | 1      | MET  |
| 6   | F     | 19     | ARG  |
| 6   | F     | 34     | ASN  |
| 6   | F     | 66     | ARG  |
| 6   | F     | 76[A]  | SER  |
| 6   | F     | 76[B]  | SER  |
| 6   | F     | 87     | LEU  |
| 6   | F     | 90     | SER  |
| 6   | F     | 91     | CYS  |
| 6   | F     | 156    | LYS  |
| 6   | F     | 168    | GLU  |
| 6   | F     | 172    | PHE  |
| 6   | F     | 197    | ARG  |
| 6   | F     | 230    | SER  |
| 6   | F     | 232    | ASN  |
| 6   | F     | 241    | THR  |
| 6   | F     | 242    | ASN  |
| 6   | F     | 244    | CYS  |
| 6   | F     | 246    | GLN  |

Continued on next page...

Continued from previous page...

| Mol | Chain | Res    | Type |
|-----|-------|--------|------|
| 6   | F     | 247    | LYS  |
| 6   | F     | 249    | TYR  |
| 6   | F     | 251    | LYS  |
| 6   | F     | 255    | ARG  |
| 6   | F     | 258    | GLU  |
| 6   | F     | 284[A] | LEU  |
| 6   | F     | 284[B] | LEU  |
| 6   | F     | 305    | LYS  |

Sometimes sidechains can be flipped to improve hydrogen bonding and reduce clashes. All (21) such sidechains are listed below:

| Mol | Chain | Res | Type |
|-----|-------|-----|------|
| 1   | A     | 61  | HIS  |
| 1   | A     | 283 | HIS  |
| 1   | A     | 329 | ASN  |
| 1   | A     | 342 | GLN  |
| 2   | B     | 192 | HIS  |
| 2   | B     | 282 | GLN  |
| 2   | B     | 300 | ASN  |
| 2   | B     | 334 | ASN  |
| 2   | B     | 424 | ASN  |
| 2   | B     | 433 | GLN  |
| 3   | C     | 18  | ASN  |
| 3   | C     | 256 | GLN  |
| 3   | C     | 301 | GLN  |
| 4   | D     | 50  | ASN  |
| 4   | D     | 59  | ASN  |
| 4   | D     | 294 | GLN  |
| 4   | D     | 300 | ASN  |
| 5   | E     | 92  | ASN  |
| 5   | E     | 111 | ASN  |
| 5   | E     | 124 | GLN  |
| 6   | F     | 34  | ASN  |

### 5.3.3 RNA [i](#)

There are no RNA molecules in this entry.

## 5.4 Non-standard residues in protein, DNA, RNA chains [i](#)

There are no non-standard protein/DNA/RNA residues in this entry.

## 5.5 Carbohydrates [i](#)

There are no monosaccharides in this entry.

## 5.6 Ligand geometry [i](#)

Of 16 ligands modelled in this entry, 8 are monoatomic and 3 could not be matched to an existing wwPDB Chemical Component Dictionary definition at this stage - leaving 5 for Mogul analysis.

In the following table, the Counts columns list the number of bonds (or angles) for which Mogul statistics could be retrieved, the number of bonds (or angles) that are observed in the model and the number of bonds (or angles) that are defined in the Chemical Component Dictionary. The Link column lists molecule types, if any, to which the group is linked. The Z score for a bond length (or angle) is the number of standard deviations the observed value is removed from the expected value. A bond length (or angle) with  $|Z| > 2$  is considered an outlier worth inspection. RMSZ is the root-mean-square of all Z scores of the bond lengths (or angles).

| Mol | Type | Chain | Res | Link | Bond lengths |      |          | Bond angles |      |          |
|-----|------|-------|-----|------|--------------|------|----------|-------------|------|----------|
|     |      |       |     |      | Counts       | RMSZ | # Z  > 2 | Counts      | RMSZ | # Z  > 2 |
| 12  | GDP  | X     | 508 | 8    | 24,30,30     | 0.88 | 0        | 30,47,47    | 1.18 | 4 (13%)  |
| 7   | GTP  | X     | 510 | 8    | 26,34,34     | 1.04 | 3 (11%)  | 32,54,54    | 0.70 | 1 (3%)   |
| 7   | GTP  | X     | 501 | 8    | 26,34,34     | 1.07 | 2 (7%)   | 32,54,54    | 1.34 | 6 (18%)  |
| 13  | ACP  | X     | 515 | -    | 27,33,33     | 0.89 | 1 (3%)   | 32,52,52    | 0.85 | 1 (3%)   |
| 12  | GDP  | X     | 513 | 8    | 24,30,30     | 1.04 | 1 (4%)   | 30,47,47    | 1.04 | 2 (6%)   |

In the following table, the Chirals column lists the number of chiral outliers, the number of chiral centers analysed, the number of these observed in the model and the number defined in the Chemical Component Dictionary. Similar counts are reported in the Torsion and Rings columns. '-' means no outliers of that kind were identified.

| Mol | Type | Chain | Res | Link | Chirals | Torsions   | Rings   |
|-----|------|-------|-----|------|---------|------------|---------|
| 12  | GDP  | X     | 508 | 8    | -       | 3/12/32/32 | 0/3/3/3 |
| 7   | GTP  | X     | 510 | 8    | -       | 6/18/38/38 | 0/3/3/3 |
| 7   | GTP  | X     | 501 | 8    | -       | 6/18/38/38 | 0/3/3/3 |
| 13  | ACP  | X     | 515 | -    | -       | 7/15/38/38 | 0/3/3/3 |
| 12  | GDP  | X     | 513 | 8    | -       | 8/12/32/32 | 0/3/3/3 |

All (7) bond length outliers are listed below:

| Mol | Chain | Res | Type | Atoms  | Z     | Observed(Å) | Ideal(Å) |
|-----|-------|-----|------|--------|-------|-------------|----------|
| 7   | X     | 501 | GTP  | C5-C6  | -3.19 | 1.40        | 1.47     |
| 12  | X     | 513 | GDP  | C6-N1  | -3.12 | 1.33        | 1.37     |
| 7   | X     | 510 | GTP  | C5-C6  | -2.76 | 1.41        | 1.47     |
| 13  | X     | 515 | ACP  | PB-O2B | -2.37 | 1.50        | 1.56     |
| 7   | X     | 510 | GTP  | C8-N7  | -2.17 | 1.31        | 1.35     |
| 7   | X     | 501 | GTP  | C2-N3  | 2.05  | 1.38        | 1.33     |
| 7   | X     | 510 | GTP  | C5-C4  | -2.00 | 1.38        | 1.43     |

All (14) bond angle outliers are listed below:

| Mol | Chain | Res | Type | Atoms      | Z     | Observed(°) | Ideal(°) |
|-----|-------|-----|------|------------|-------|-------------|----------|
| 7   | X     | 501 | GTP  | C8-N7-C5   | 3.18  | 109.05      | 102.99   |
| 7   | X     | 501 | GTP  | C5-C6-N1   | 2.90  | 119.07      | 113.95   |
| 12  | X     | 508 | GDP  | C8-N7-C5   | 2.65  | 108.05      | 102.99   |
| 7   | X     | 501 | GTP  | C2-N1-C6   | -2.33 | 120.80      | 125.10   |
| 7   | X     | 501 | GTP  | PB-O3B-PG  | -2.31 | 124.89      | 132.83   |
| 13  | X     | 515 | ACP  | C5-C6-N6   | 2.28  | 123.81      | 120.35   |
| 12  | X     | 508 | GDP  | O6-C6-C5   | -2.27 | 119.94      | 124.37   |
| 12  | X     | 508 | GDP  | C5-C6-N1   | 2.23  | 117.89      | 113.95   |
| 12  | X     | 508 | GDP  | O3B-PB-O3A | 2.22  | 112.08      | 104.64   |
| 7   | X     | 501 | GTP  | PA-O3A-PB  | -2.20 | 125.26      | 132.83   |
| 12  | X     | 513 | GDP  | C8-N7-C5   | 2.17  | 107.12      | 102.99   |
| 7   | X     | 501 | GTP  | O2G-PG-O3B | 2.07  | 111.59      | 104.64   |
| 7   | X     | 510 | GTP  | O6-C6-C5   | 2.05  | 128.38      | 124.37   |
| 12  | X     | 513 | GDP  | C5-C6-N1   | 2.02  | 117.52      | 113.95   |

There are no chirality outliers.

All (30) torsion outliers are listed below:

| Mol | Chain | Res | Type | Atoms           |
|-----|-------|-----|------|-----------------|
| 7   | X     | 501 | GTP  | PB-O3B-PG-O2G   |
| 7   | X     | 501 | GTP  | C5'-O5'-PA-O1A  |
| 7   | X     | 501 | GTP  | C5'-O5'-PA-O2A  |
| 7   | X     | 510 | GTP  | C5'-O5'-PA-O1A  |
| 12  | X     | 508 | GDP  | C5'-O5'-PA-O1A  |
| 12  | X     | 508 | GDP  | C5'-O5'-PA-O2A  |
| 12  | X     | 513 | GDP  | C5'-O5'-PA-O1A  |
| 12  | X     | 513 | GDP  | C3'-C4'-C5'-O5' |
| 13  | X     | 515 | ACP  | PG-C3B-PB-O1B   |
| 13  | X     | 515 | ACP  | PG-C3B-PB-O2B   |
| 13  | X     | 515 | ACP  | C3'-C4'-C5'-O5' |

Continued on next page...

Continued from previous page...

| Mol | Chain | Res | Type | Atoms           |
|-----|-------|-----|------|-----------------|
| 12  | X     | 513 | GDP  | O4'-C4'-C5'-O5' |
| 13  | X     | 515 | ACP  | O4'-C4'-C5'-O5' |
| 12  | X     | 513 | GDP  | PA-O3A-PB-O1B   |
| 13  | X     | 515 | ACP  | C4'-C5'-O5'-PA  |
| 12  | X     | 513 | GDP  | C5'-O5'-PA-O3A  |
| 7   | X     | 510 | GTP  | C5'-O5'-PA-O2A  |
| 12  | X     | 513 | GDP  | C5'-O5'-PA-O2A  |
| 13  | X     | 515 | ACP  | PG-C3B-PB-O3A   |
| 7   | X     | 501 | GTP  | PB-O3B-PG-O3G   |
| 7   | X     | 510 | GTP  | PB-O3B-PG-O2G   |
| 12  | X     | 513 | GDP  | PA-O3A-PB-O2B   |
| 12  | X     | 513 | GDP  | PA-O3A-PB-O3B   |
| 7   | X     | 501 | GTP  | C5'-O5'-PA-O3A  |
| 7   | X     | 510 | GTP  | C5'-O5'-PA-O3A  |
| 12  | X     | 508 | GDP  | C5'-O5'-PA-O3A  |
| 7   | X     | 501 | GTP  | PB-O3A-PA-O2A   |
| 7   | X     | 510 | GTP  | PB-O3A-PA-O1A   |
| 7   | X     | 510 | GTP  | PB-O3A-PA-O2A   |
| 13  | X     | 515 | ACP  | C5'-O5'-PA-O1A  |

There are no ring outliers.

3 monomers are involved in 7 short contacts:

| Mol | Chain | Res | Type | Clashes | Symm-Clashes |
|-----|-------|-----|------|---------|--------------|
| 12  | X     | 508 | GDP  | 1       | 0            |
| 13  | X     | 515 | ACP  | 4       | 0            |
| 12  | X     | 513 | GDP  | 2       | 0            |

The following is a two-dimensional graphical depiction of Mogul quality analysis of bond lengths, bond angles, torsion angles, and ring geometry for all instances of the Ligand of Interest. In addition, ligands with molecular weight > 250 and outliers as shown on the validation Tables will also be included. For torsion angles, if less than 5% of the Mogul distribution of torsion angles is within 10 degrees of the torsion angle in question, then that torsion angle is considered an outlier. Any bond that is central to one or more torsion angles identified as an outlier by Mogul will be highlighted in the graph. For rings, the root-mean-square deviation (RMSD) between the ring in question and similar rings identified by Mogul is calculated over all ring torsion angles. If the average RMSD is greater than 60 degrees and the minimal RMSD between the ring in question and any Mogul-identified rings is also greater than 60 degrees, then that ring is considered an outlier. The outliers are highlighted in purple. The color gray indicates Mogul did not find sufficient equivalents in the CSD to analyse the geometry.

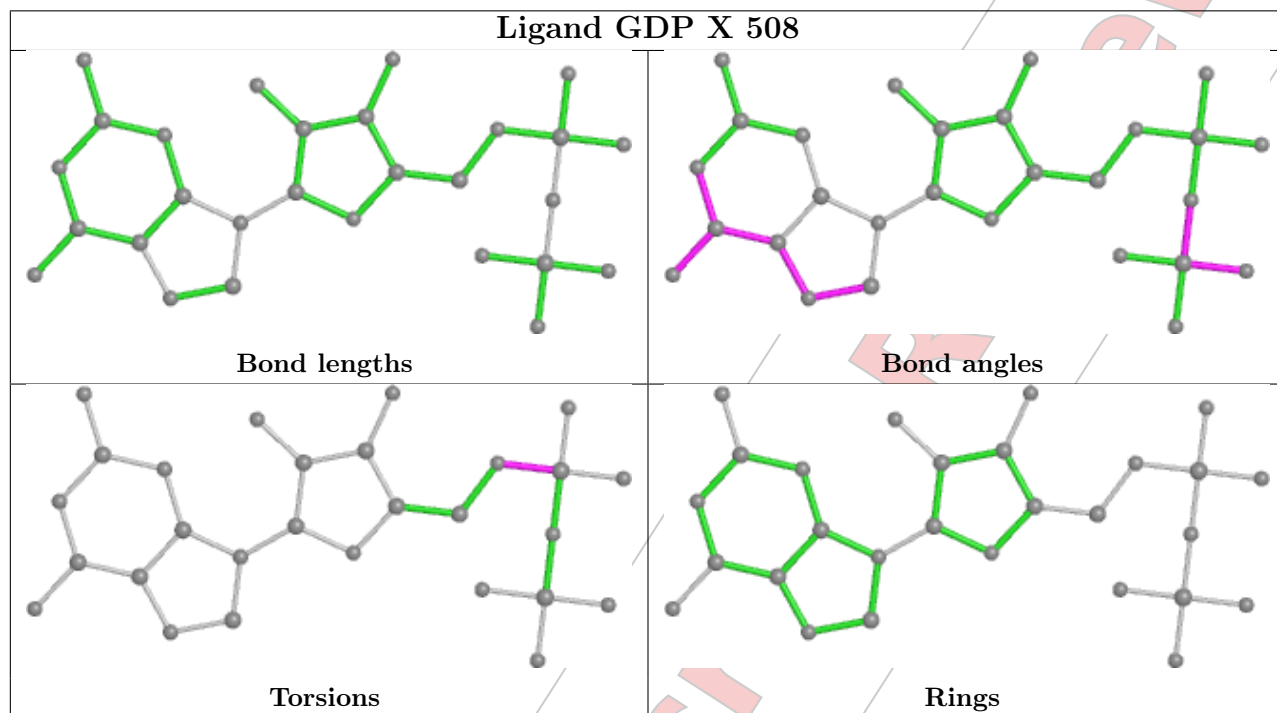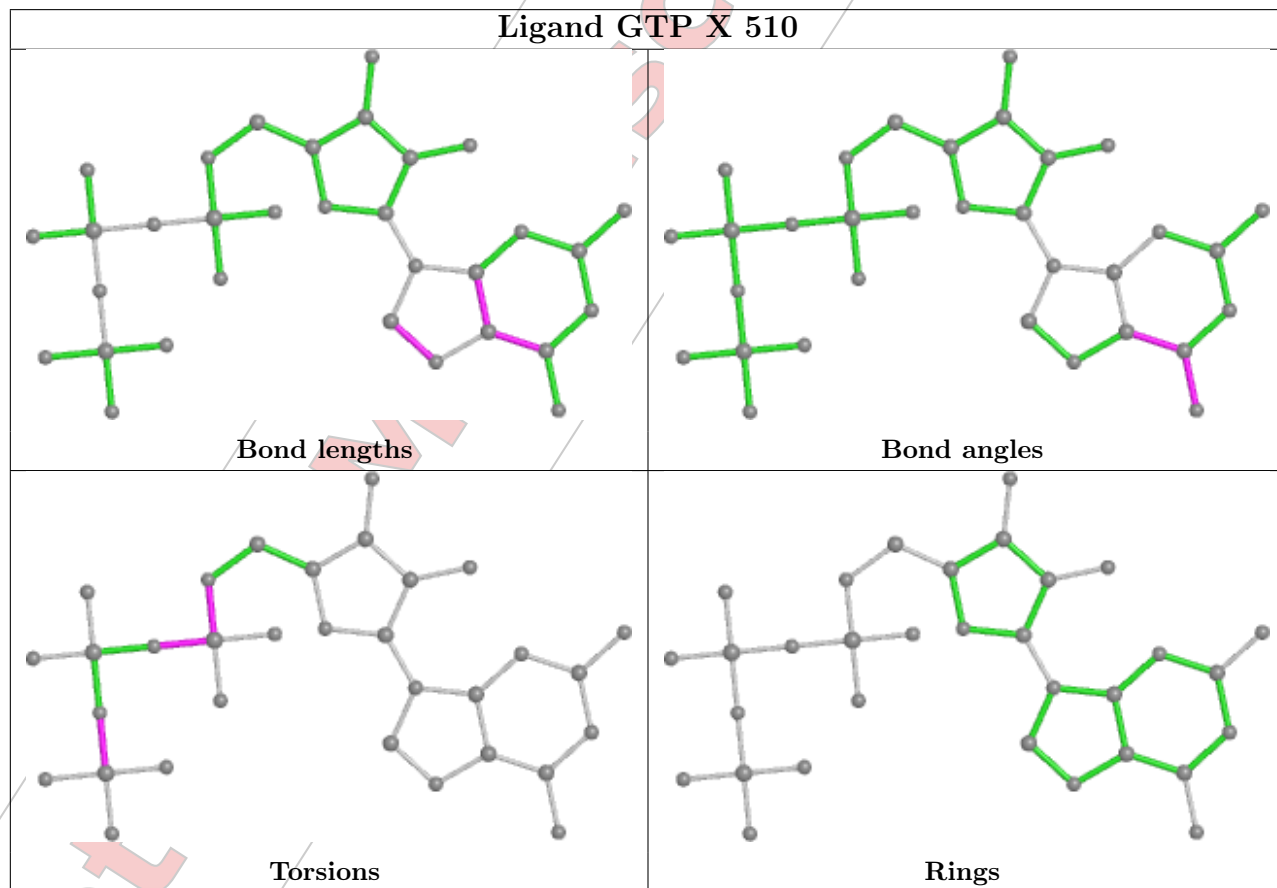

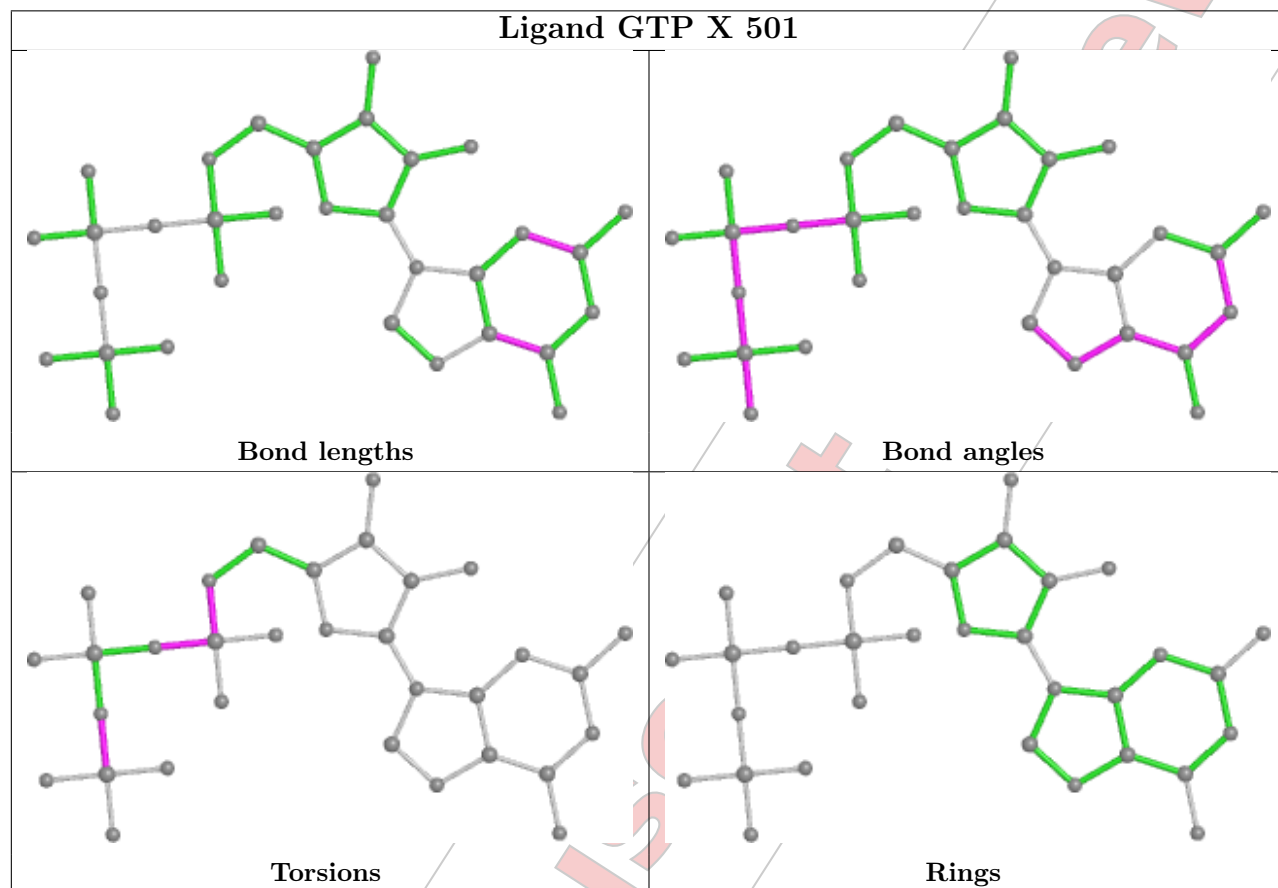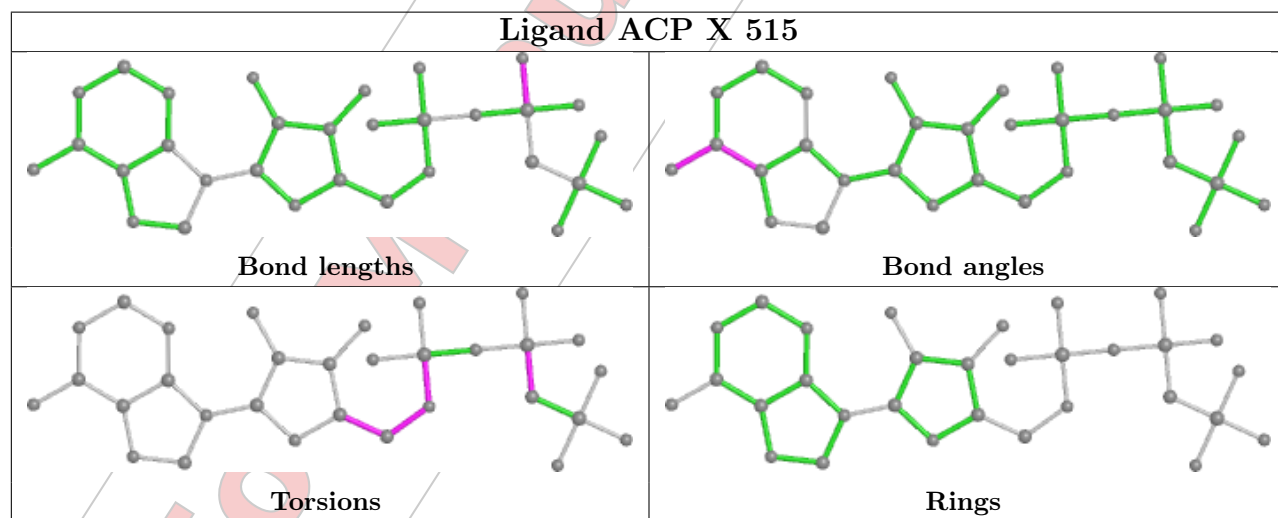

Not For Manuscript Review

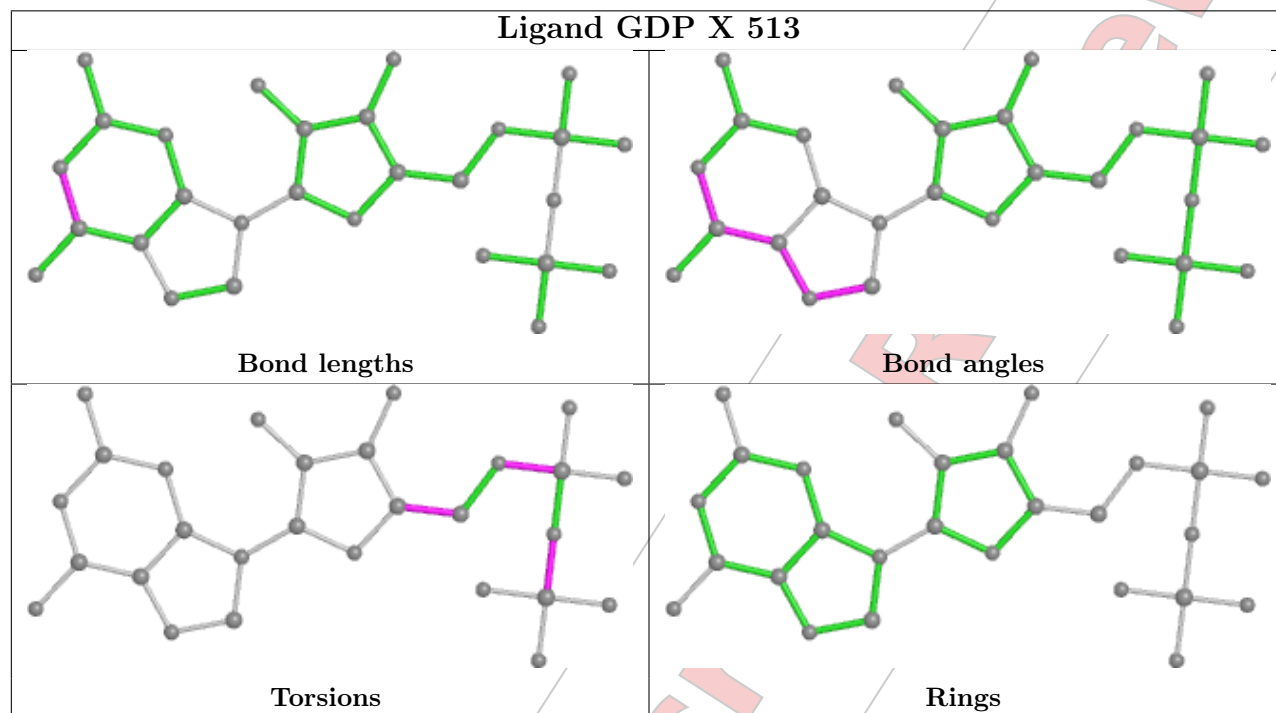

## 5.7 Other polymers [i](#)

There are no such residues in this entry.

## 5.8 Polymer linkage issues [i](#)

The following chains have linkage breaks:

| Mol | Chain | Number of breaks |
|-----|-------|------------------|
| 6   | F     | 2                |
| 5   | E     | 1                |

All chain breaks are listed below:

| Model | Chain | Residue-1 | Atom-1 | Residue-2 | Atom-2 | Distance (Å) |
|-------|-------|-----------|--------|-----------|--------|--------------|
| 1     | E     | 28:SER    | C      | 44:ASP    | N      | 34.14        |
| 1     | F     | 362:ALA   | C      | 371:PRO   | N      | 14.08        |
| 1     | F     | 105:LEU   | C      | 125:THR   | N      | 12.54        |

## 6 Fit of model and data [i](#)

### 6.1 Protein, DNA and RNA chains [i](#)

In the following table, the column labelled '#RSRZ > 2' contains the number (and percentage) of RSRZ outliers, followed by percent RSRZ outliers for the chain as percentile scores relative to all X-ray entries and entries of similar resolution. The OWAB column contains the minimum, median, 95<sup>th</sup> percentile and maximum values of the occupancy-weighted average B-factor per residue. The column labelled 'Q < 0.9' lists the number of (and percentage) of residues with an average occupancy less than 0.9.

| Mol | Chain | Analysed         | <RSRZ> | #RSRZ > 2     | OWAB(Å <sup>2</sup> ) | Q < 0.9 |
|-----|-------|------------------|--------|---------------|-----------------------|---------|
| 1   | A     | 439/439 (100%)   | 0.13   | 18 (4%) 37 27 | 35, 55, 98, 179       | 0       |
| 2   | B     | 428/428 (100%)   | 0.33   | 33 (7%) 13 7  | 30, 53, 105, 163      | 4 (0%)  |
| 3   | C     | 440/440 (100%)   | -0.07  | 12 (2%) 54 44 | 26, 44, 79, 115       | 0       |
| 4   | D     | 431/431 (100%)   | 0.29   | 32 (7%) 14 8  | 38, 64, 108, 170      | 3 (0%)  |
| 5   | E     | 123/123 (100%)   | 0.68   | 17 (13%) 2 1  | 43, 72, 124, 184      | 0       |
| 6   | F     | 351/351 (100%)   | 1.37   | 106 (30%) 0 0 | 48, 88, 184, 219      | 0       |
| All | All   | 2212/2212 (100%) | 0.39   | 218 (9%) 7 4  | 26, 59, 128, 219      | 7 (0%)  |

All (218) RSRZ outliers are listed below:

| Mol | Chain | Res | Type | RSRZ |
|-----|-------|-----|------|------|
| 6   | F     | 371 | PRO  | 12.2 |
| 6   | F     | 253 | TYR  | 11.3 |
| 5   | E     | 142 | GLU  | 9.0  |
| 6   | F     | 137 | ARG  | 8.8  |
| 4   | D     | 441 | ASP  | 8.5  |
| 6   | F     | 157 | GLY  | 8.3  |
| 6   | F     | 372 | THR  | 7.9  |
| 6   | F     | 252 | ASN  | 7.8  |
| 6   | F     | 254 | GLY  | 7.7  |
| 6   | F     | 232 | ASN  | 7.4  |
| 6   | F     | 167 | SER  | 7.1  |
| 1   | A     | 439 | SER  | 7.0  |
| 2   | B     | 279 | GLY  | 6.3  |
| 6   | F     | 155 | ALA  | 6.0  |
| 6   | F     | 136 | ASN  | 6.0  |
| 6   | F     | 125 | THR  | 6.0  |
| 6   | F     | 141 | GLY  | 5.9  |
| 6   | F     | 255 | ARG  | 5.8  |
| 5   | E     | 143 | ALA  | 5.8  |

Continued on next page...

*Continued from previous page...*

| Mol | Chain | Res | Type | RSRZ |
|-----|-------|-----|------|------|
| 1   | A     | 438 | ASP  | 5.6  |
| 6   | F     | 158 | GLU  | 5.6  |
| 6   | F     | 154 | GLY  | 5.6  |
| 6   | F     | 171 | ASP  | 5.6  |
| 6   | F     | 233 | PHE  | 5.5  |
| 6   | F     | 175 | GLU  | 5.5  |
| 5   | E     | 141 | GLU  | 5.5  |
| 6   | F     | 248 | GLU  | 5.4  |
| 6   | F     | 142 | ARG  | 5.4  |
| 6   | F     | 138 | ARG  | 5.4  |
| 6   | F     | 156 | LYS  | 5.3  |
| 2   | B     | 59  | ASN  | 5.3  |
| 6   | F     | 251 | LYS  | 5.3  |
| 6   | F     | 249 | TYR  | 5.2  |
| 2   | B     | 305 | CYS  | 5.2  |
| 6   | F     | 139 | ARG  | 5.1  |
| 6   | F     | 244 | CYS  | 5.1  |
| 6   | F     | 243 | HIS  | 5.0  |
| 6   | F     | 250 | SER  | 5.0  |
| 6   | F     | 165 | GLU  | 4.8  |
| 6   | F     | 178 | GLN  | 4.7  |
| 6   | F     | 258 | GLU  | 4.7  |
| 4   | D     | 416 | MET  | 4.6  |
| 6   | F     | 103 | THR  | 4.5  |
| 6   | F     | 259 | GLY  | 4.5  |
| 4   | D     | 57  | THR  | 4.5  |
| 6   | F     | 238 | CYS  | 4.5  |
| 6   | F     | 90  | SER  | 4.4  |
| 6   | F     | 126 | ASP  | 4.4  |
| 4   | D     | 283 | TYR  | 4.4  |
| 6   | F     | 234 | GLN  | 4.3  |
| 3   | C     | 337 | THR  | 4.2  |
| 6   | F     | 241 | THR  | 4.2  |
| 1   | A     | 282 | TYR  | 4.2  |
| 6   | F     | 91  | CYS  | 4.2  |
| 2   | B     | 58  | GLY  | 4.2  |
| 6   | F     | 104 | ASN  | 4.1  |
| 2   | B     | 280 | SER  | 4.1  |
| 6   | F     | 134 | ALA  | 4.1  |
| 6   | F     | 143 | GLU  | 4.0  |
| 6   | F     | 194 | PRO  | 4.0  |
| 6   | F     | 242 | ASN  | 4.0  |

*Continued on next page...*

*Continued from previous page...*

| Mol | Chain | Res   | Type | RSRZ |
|-----|-------|-------|------|------|
| 6   | F     | 46    | ARG  | 3.9  |
| 6   | F     | 237   | THR  | 3.9  |
| 2   | B     | 438   | ALA  | 3.9  |
| 4   | D     | 80    | SER  | 3.9  |
| 6   | F     | 240   | LEU  | 3.9  |
| 6   | F     | 83    | THR  | 3.9  |
| 2   | B     | 278   | ARG  | 3.8  |
| 2   | B     | 80    | SER  | 3.8  |
| 6   | F     | 153   | ALA  | 3.8  |
| 1   | A     | 337   | THR  | 3.8  |
| 2   | B     | 281   | GLN  | 3.8  |
| 4   | D     | 179   | ASP  | 3.7  |
| 6   | F     | 235   | ASP  | 3.7  |
| 6   | F     | 245   | ILE  | 3.7  |
| 2   | B     | 321   | GLY  | 3.7  |
| 6   | F     | 105   | LEU  | 3.7  |
| 6   | F     | 11    | SER  | 3.6  |
| 6   | F     | 195   | GLY  | 3.6  |
| 6   | F     | 229   | ASN  | 3.6  |
| 6   | F     | 225   | SER  | 3.5  |
| 4   | D     | 220   | THR  | 3.5  |
| 6   | F     | 84    | SER  | 3.5  |
| 2   | B     | 1     | MET  | 3.4  |
| 6   | F     | 170   | LEU  | 3.4  |
| 2   | B     | 57    | THR  | 3.4  |
| 6   | F     | 159   | GLY  | 3.4  |
| 6   | F     | 246   | GLN  | 3.4  |
| 2   | B     | 369   | ARG  | 3.4  |
| 2   | B     | 246   | GLY  | 3.3  |
| 2   | B     | 370   | GLY  | 3.3  |
| 5   | E     | 27    | PRO  | 3.3  |
| 2   | B     | 82    | PRO  | 3.3  |
| 6   | F     | 129   | GLU  | 3.2  |
| 6   | F     | 76[A] | SER  | 3.2  |
| 4   | D     | 76    | ASP  | 3.2  |
| 6   | F     | 176   | GLN  | 3.2  |
| 4   | D     | 37    | HIS  | 3.2  |
| 6   | F     | 89    | GLU  | 3.2  |
| 2   | B     | 215   | ARG  | 3.1  |
| 6   | F     | 25    | GLY  | 3.1  |
| 6   | F     | 168   | GLU  | 3.1  |
| 6   | F     | 132   | LEU  | 3.1  |

*Continued on next page...*

*Continued from previous page...*

| Mol | Chain | Res    | Type | RSRZ |
|-----|-------|--------|------|------|
| 4   | D     | 221[A] | THR  | 3.1  |
| 2   | B     | 39     | ASP  | 3.0  |
| 6   | F     | 236    | LYS  | 3.0  |
| 4   | D     | 406    | HIS  | 3.0  |
| 6   | F     | 256    | TYR  | 3.0  |
| 2   | B     | 338    | LYS  | 3.0  |
| 5   | E     | 44     | ASP  | 3.0  |
| 2   | B     | 56     | ALA  | 3.0  |
| 1   | A     | 335    | ILE  | 2.9  |
| 6   | F     | 174    | ASP  | 2.9  |
| 1   | A     | 131    | GLY  | 2.9  |
| 3   | C     | 440    | VAL  | 2.9  |
| 2   | B     | 129    | CYS  | 2.9  |
| 6   | F     | 10     | ASN  | 2.9  |
| 1   | A     | 80[A]  | THR  | 2.9  |
| 6   | F     | 271[A] | LEU  | 2.9  |
| 3   | C     | 1      | MET  | 2.9  |
| 3   | C     | 334    | THR  | 2.9  |
| 4   | D     | 96     | GLN  | 2.9  |
| 4   | D     | 127    | GLU  | 2.9  |
| 6   | F     | 152    | SER  | 2.8  |
| 4   | D     | 89     | PRO  | 2.8  |
| 6   | F     | 177    | GLY  | 2.8  |
| 4   | D     | 82     | PRO  | 2.8  |
| 6   | F     | 73     | ARG  | 2.8  |
| 6   | F     | 180    | HIS  | 2.8  |
| 3   | C     | 247    | ALA  | 2.7  |
| 6   | F     | 373    | SER  | 2.7  |
| 4   | D     | 281    | GLN  | 2.7  |
| 2   | B     | 40     | SER  | 2.7  |
| 1   | A     | 44     | GLY  | 2.7  |
| 5   | E     | 131    | GLU  | 2.7  |
| 6   | F     | 257    | GLU  | 2.7  |
| 4   | D     | 38     | GLY  | 2.7  |
| 6   | F     | 21     | LEU  | 2.7  |
| 1   | A     | 279    | GLU  | 2.7  |
| 2   | B     | 247    | GLN  | 2.7  |
| 6   | F     | 140    | GLU  | 2.7  |
| 5   | E     | 6      | MET  | 2.7  |
| 6   | F     | 224    | SER  | 2.6  |
| 4   | D     | 337    | ASN  | 2.6  |
| 1   | A     | 163    | LYS  | 2.6  |

*Continued on next page...*

*Continued from previous page...*

| Mol | Chain | Res | Type | RSRZ |
|-----|-------|-----|------|------|
| 5   | E     | 128 | LYS  | 2.6  |
| 2   | B     | 334 | ASN  | 2.6  |
| 5   | E     | 48  | GLU  | 2.6  |
| 6   | F     | 239 | HIS  | 2.6  |
| 5   | E     | 140 | LYS  | 2.6  |
| 3   | C     | 249 | ASN  | 2.6  |
| 4   | D     | 397 | ALA  | 2.6  |
| 3   | C     | 349 | THR  | 2.6  |
| 1   | A     | 281 | ALA  | 2.6  |
| 6   | F     | 135 | TYR  | 2.5  |
| 6   | F     | 226 | GLU  | 2.5  |
| 4   | D     | 282 | GLN  | 2.5  |
| 6   | F     | 23  | ALA  | 2.5  |
| 2   | B     | 437 | ASP  | 2.5  |
| 1   | A     | 338 | LYS  | 2.5  |
| 6   | F     | 323 | GLU  | 2.4  |
| 2   | B     | 81  | GLY  | 2.4  |
| 6   | F     | 231 | ALA  | 2.4  |
| 1   | A     | 283 | HIS  | 2.4  |
| 4   | D     | 39  | ASP  | 2.4  |
| 6   | F     | 247 | LYS  | 2.4  |
| 6   | F     | 169 | LEU  | 2.4  |
| 6   | F     | 357 | SER  | 2.4  |
| 2   | B     | 37  | HIS  | 2.4  |
| 5   | E     | 9   | ILE  | 2.4  |
| 6   | F     | 217 | ARG  | 2.4  |
| 6   | F     | 329 | LEU  | 2.4  |
| 4   | D     | 33  | THR  | 2.4  |
| 4   | D     | 58  | GLY  | 2.4  |
| 2   | B     | 127 | GLU  | 2.4  |
| 6   | F     | 342 | LEU  | 2.4  |
| 5   | E     | 103 | GLN  | 2.3  |
| 3   | C     | 78  | VAL  | 2.3  |
| 6   | F     | 151 | SER  | 2.3  |
| 1   | A     | 326 | LYS  | 2.3  |
| 4   | D     | 293 | GLN  | 2.3  |
| 6   | F     | 197 | ARG  | 2.3  |
| 6   | F     | 127 | GLU  | 2.3  |
| 6   | F     | 362 | ALA  | 2.3  |
| 2   | B     | 35  | SER  | 2.3  |
| 5   | E     | 28  | SER  | 2.3  |
| 5   | E     | 106 | GLU  | 2.3  |

*Continued on next page...*

Continued from previous page...

| Mol | Chain | Res    | Type | RSRZ |
|-----|-------|--------|------|------|
| 1   | A     | 1      | MET  | 2.3  |
| 6   | F     | 31     | ARG  | 2.3  |
| 3   | C     | 246    | GLY  | 2.3  |
| 3   | C     | 120[A] | ASP  | 2.2  |
| 6   | F     | 306    | HIS  | 2.2  |
| 6   | F     | 131    | PHE  | 2.2  |
| 1   | A     | 41     | THR  | 2.2  |
| 6   | F     | 45     | ASN  | 2.2  |
| 4   | D     | 74     | THR  | 2.2  |
| 5   | E     | 139    | LEU  | 2.2  |
| 6   | F     | 230    | SER  | 2.2  |
| 4   | D     | 78     | VAL  | 2.2  |
| 5   | E     | 122    | ARG  | 2.2  |
| 4   | D     | 430    | SER  | 2.2  |
| 4   | D     | 401    | ARG  | 2.2  |
| 1   | A     | 42     | ILE  | 2.1  |
| 2   | B     | 416    | MET  | 2.1  |
| 2   | B     | 282    | GLN  | 2.1  |
| 6   | F     | 19     | ARG  | 2.1  |
| 1   | A     | 61     | HIS  | 2.1  |
| 2   | B     | 130    | ASP  | 2.1  |
| 6   | F     | 145    | ASN  | 2.1  |
| 4   | D     | 70     | LEU  | 2.0  |
| 5   | E     | 138    | GLU  | 2.0  |
| 3   | C     | 245    | ASP  | 2.0  |
| 4   | D     | 41     | ASP  | 2.0  |
| 6   | F     | 352    | ASP  | 2.0  |
| 3   | C     | 81     | GLY  | 2.0  |
| 2   | B     | 120    | ASP  | 2.0  |
| 4   | D     | 396    | THR  | 2.0  |
| 4   | D     | 1      | MET  | 2.0  |

## 6.2 Non-standard residues in protein, DNA, RNA chains [i](#)

There are no non-standard protein/DNA/RNA residues in this entry.

## 6.3 Carbohydrates [i](#)

There are no monosaccharides in this entry.

## 6.4 Ligands [i](#)

LIGAND-RSR INFOmissingINFO

## 6.5 Other polymers [i](#)

There are no such residues in this entry.

Not For Manuscript Review



# Preliminary Full wwPDB X-ray Structure Validation Report ⓘ

Feb 15, 2023 – 08:52 pm GMT

Deposition ID : D\_1292128624

**This wwPDB validation report is NOT for manuscript review**

This is a Preliminary Full wwPDB X-ray Structure Validation Report.

This report is produced by the wwPDB Deposition System during initial deposition but before annotation of the structure.

We welcome your comments at [validation@mail.wwpdb.org](mailto:validation@mail.wwpdb.org)

A user guide is available at

<https://www.wwpdb.org/validation/2017/XrayValidationReportHelp>

with specific help available everywhere you see the ⓘ symbol.

The types of validation reports are described at

<http://www.wwpdb.org/validation/2017/FAQs#types>.

---

The following versions of software and data (see [references ⓘ](#)) were used in the production of this report:

|                                |   |                                                                    |
|--------------------------------|---|--------------------------------------------------------------------|
| MolProbity                     | : | 4.02b-467                                                          |
| Mogul                          | : | 1.8.4, CSD as541be (2020)                                          |
| Xtriage (Phenix)               | : | 1.13                                                               |
| EDS                            | : | 2.32.1                                                             |
| buster-report                  | : | 1.1.7 (2018)                                                       |
| Percentile statistics          | : | 20191225.v01 (using entries in the PDB archive December 25th 2019) |
| Refmac                         | : | 5.8.0158                                                           |
| CCP4                           | : | 7.0.044 (Gargrove)                                                 |
| Ideal geometry (proteins)      | : | Engh & Huber (2001)                                                |
| Ideal geometry (DNA, RNA)      | : | Parkinson et al. (1996)                                            |
| Validation Pipeline (wwPDB-VP) | : | 2.32.1                                                             |

# 1 Overall quality at a glance i

The following experimental techniques were used to determine the structure:

*X-RAY DIFFRACTION*

The reported resolution of this entry is 2.50 Å.

Percentile scores (ranging between 0-100) for global validation metrics of the entry are shown in the following graphic. The table shows the number of entries on which the scores are based.

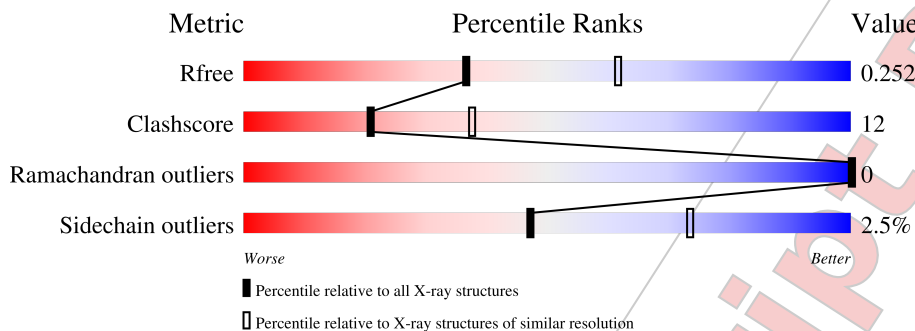

| Metric                | Whole archive (#Entries) | Similar resolution (#Entries, resolution range(Å)) |
|-----------------------|--------------------------|----------------------------------------------------|
| $R_{free}$            | 130704                   | 4661 (2.50-2.50)                                   |
| Clashscore            | 141614                   | 5346 (2.50-2.50)                                   |
| Ramachandran outliers | 138981                   | 5231 (2.50-2.50)                                   |
| Sidechain outliers    | 138945                   | 5233 (2.50-2.50)                                   |

The table below summarises the geometric issues observed across the polymeric chains and their fit to the electron density. The red, orange, yellow and green segments of the lower bar indicate the fraction of residues that contain outliers for  $\geq 3$ , 2, 1 and 0 types of geometric quality criteria respectively. A grey segment represents the fraction of residues that are not modelled. The numeric value for each fraction is indicated below the corresponding segment, with a dot representing fractions  $\leq 5\%$ .

| Mol | Chain | Length | Quality of chain                    |
|-----|-------|--------|-------------------------------------|
| 1   | A     | 439    | 74% (green), 25% (yellow), . (grey) |
| 2   | B     | 429    | 79% (green), 20% (yellow), . (grey) |
| 3   | C     | 440    | 83% (green), 16% (yellow), . (grey) |
| 4   | D     | 430    | 76% (green), 23% (yellow), . (grey) |
| 5   | E     | 123    | 80% (green), 18% (yellow), . (grey) |
| 6   | F     | 332    | 64% (green), 34% (yellow), . (grey) |

## 2 Entry composition [i](#)

There are 17 unique types of molecules in this entry. The entry contains 18174 atoms, of which 252 are hydrogens and 0 are deuteriums.

In the tables below, the ZeroOcc column contains the number of atoms modelled with zero occupancy, the AltConf column contains the number of residues with at least one atom in alternate conformation and the Trace column contains the number of residues modelled with at most 2 atoms.

- Molecule 1 is a protein called Tubulin alpha-1B chain.

| Mol | Chain | Residues | Atoms |      |     |     |    | ZeroOcc | AltConf | Trace |
|-----|-------|----------|-------|------|-----|-----|----|---------|---------|-------|
|     |       |          | Total | C    | N   | O   | S  |         |         |       |
| 1   | A     | 439      | 3441  | 2175 | 585 | 658 | 23 | 0       | 2       | 0     |

- Molecule 2 is a protein called Tubulin beta-2B chain.

| Mol | Chain | Residues | Atoms |      |     |     |    | ZeroOcc | AltConf | Trace |
|-----|-------|----------|-------|------|-----|-----|----|---------|---------|-------|
|     |       |          | Total | C    | N   | O   | S  |         |         |       |
| 2   | B     | 429      | 3386  | 2125 | 579 | 655 | 27 | 2       | 3       | 0     |

- Molecule 3 is a protein called Tubulin alpha-1B chain.

| Mol | Chain | Residues | Atoms |      |     |     |    | ZeroOcc | AltConf | Trace |
|-----|-------|----------|-------|------|-----|-----|----|---------|---------|-------|
|     |       |          | Total | C    | N   | O   | S  |         |         |       |
| 3   | C     | 440      | 3464  | 2190 | 590 | 661 | 23 | 0       | 4       | 0     |

- Molecule 4 is a protein called Tubulin beta-2B chain.

| Mol | Chain | Residues | Atoms |      |     |     |    | ZeroOcc | AltConf | Trace |
|-----|-------|----------|-------|------|-----|-----|----|---------|---------|-------|
|     |       |          | Total | C    | N   | O   | S  |         |         |       |
| 4   | D     | 430      | 3376  | 2117 | 577 | 656 | 26 | 2       | 1       | 0     |

- Molecule 5 is a protein called Stathmin-4.

| Mol | Chain | Residues | Atoms |     |     |     |   | ZeroOcc | AltConf | Trace |
|-----|-------|----------|-------|-----|-----|-----|---|---------|---------|-------|
|     |       |          | Total | C   | N   | O   | S |         |         |       |
| 5   | E     | 123      | 1020  | 628 | 184 | 202 | 6 | 0       | 1       | 0     |

- Molecule 6 is a protein called Tubulin-Tyrosine Ligase.

| Mol | Chain | Residues | Atoms |      |     |     |    | ZeroOcc | AltConf | Trace |
|-----|-------|----------|-------|------|-----|-----|----|---------|---------|-------|
|     |       |          | Total | C    | N   | O   | S  |         |         |       |
| 6   | F     | 332      | 2714  | 1740 | 464 | 495 | 15 | 0       | 1       | 0     |

- Molecule 7 is GUANOSINE-5'-TRIPHOSPHATE (three-letter code: GTP) (formula:  $C_{10}H_{16}N_5O_{14}P_3$ ).



| Mol | Chain | Residues | Atoms |    |    |   | ZeroOcc | AltConf |   |
|-----|-------|----------|-------|----|----|---|---------|---------|---|
| 7   | X     | 1        | Total | C  | N  | O | P       | 0       | 0 |
|     |       |          |       | 32 | 10 | 5 | 14      |         |   |
| 7   | X     | 1        | Total | C  | N  | O | P       | 0       | 0 |
|     |       |          |       | 32 | 10 | 5 | 14      |         |   |

- Molecule 8 is MAGNESIUM ION (three-letter code: MG) (formula: Mg).

| Mol | Chain | Residues | Atoms |    | ZeroOcc | AltConf |
|-----|-------|----------|-------|----|---------|---------|
| 8   | X     | 1        | Total | Mg | 0       | 0       |
|     |       |          |       | 1  |         |         |
| 8   | X     | 1        | Total | Mg | 0       | 0       |
|     |       |          |       | 1  |         |         |
| 8   | X     | 1        | Total | Mg | 0       | 0       |
|     |       |          |       | 1  |         |         |
| 8   | X     | 1        | Total | Mg | 0       | 0       |
|     |       |          |       | 1  |         |         |

- Molecule 9 is CALCIUM ION (three-letter code: CA) (formula: Ca).

| Mol | Chain | Residues | Atoms |    | ZeroOcc | AltConf |
|-----|-------|----------|-------|----|---------|---------|
| 9   | X     | 1        | Total | Ca | 0       | 0       |
|     |       |          |       | 1  |         |         |
| 9   | X     | 1        | Total | Ca | 0       | 0       |
|     |       |          |       | 1  |         |         |

- Molecule 10 is GUANOSINE-5'-DIPHOSPHATE (three-letter code: GDP) (formula: C<sub>10</sub>H<sub>15</sub>N<sub>5</sub>O<sub>11</sub>P<sub>2</sub>).



| Mol | Chain | Residues | Atoms |    |    |   | ZeroOcc | AltConf |   |
|-----|-------|----------|-------|----|----|---|---------|---------|---|
| 10  | X     | 1        | Total | C  | N  | O | P       | 0       | 0 |
|     |       |          |       | 28 | 10 | 5 | 11      |         |   |
| 10  | X     | 1        | Total | C  | N  | O | P       | 0       | 0 |
|     |       |          |       | 28 | 10 | 5 | 11      |         |   |

- Molecule 11 is PHOSPHOMETHYLPHOSPHONIC ACID ADENYLATE ESTER (three-letter code: ACP) (formula: C<sub>11</sub>H<sub>18</sub>N<sub>5</sub>O<sub>12</sub>P<sub>3</sub>).

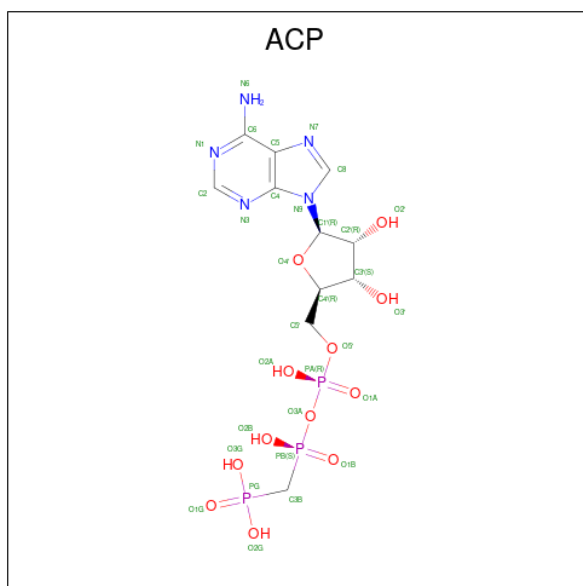

| Mol | Chain | Residues | Atoms |    |   |    |   | ZeroOcc | AltConf |
|-----|-------|----------|-------|----|---|----|---|---------|---------|
|     |       |          | Total | C  | N | O  | P |         |         |
| 11  | X     | 1        | 31    | 11 | 5 | 12 | 3 | 0       | 0       |

- Molecule 12 is a ligand with the chemical component id COL but its atom names do not match the existing wwPDB Chemical Component Dictionary definition for COL. Consequently no firm identification of ligand chemistry can be made. Once the structure is annotated then an identification and diagram will be given here.

| Mol | Chain | Residues | Atoms |    |    |   |   | ZeroOcc | AltConf |
|-----|-------|----------|-------|----|----|---|---|---------|---------|
|     |       |          | Total | C  | H  | N | O |         |         |
| 12  | X     | 1        | 54    | 22 | 25 | 1 | 6 | 0       | 0       |

- Molecule 13 is a ligand with the chemical component id EPA but its atom names do not match the existing wwPDB Chemical Component Dictionary definition for EPA. Consequently no firm identification of ligand chemistry can be made. Once the structure is annotated then an identification and diagram will be given here.

| Mol | Chain | Residues | Atoms |    |    |   |   |   | ZeroOcc | AltConf |
|-----|-------|----------|-------|----|----|---|---|---|---------|---------|
|     |       |          | Total | C  | H  | N | O | S |         |         |
| 13  | X     | 1        | 73    | 26 | 39 | 1 | 6 | 1 | 0       | 0       |
| 13  | X     | 1        | 73    | 26 | 39 | 1 | 6 | 1 | 0       | 0       |

- Molecule 14 is (2ALPHA,2'BETA,3BETA,4ALPHA,5BETA)-VINCALEUKOBLASTINE (three-letter code: VLB) (formula: C<sub>46</sub>H<sub>58</sub>N<sub>4</sub>O<sub>9</sub>).

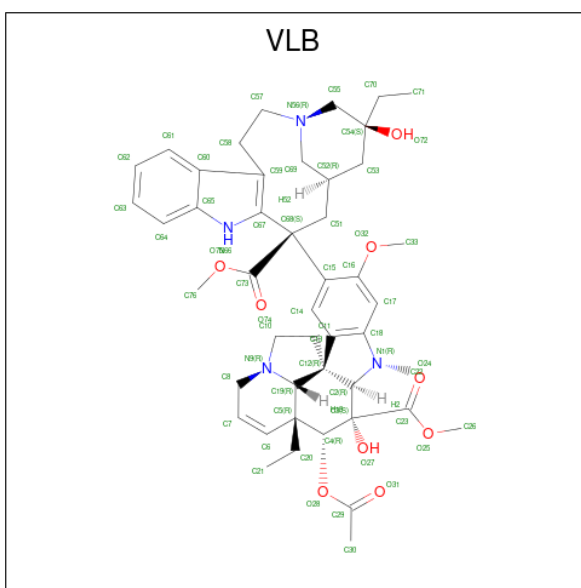

| Mol | Chain | Residues | Atoms |    |    |   |   | ZeroOcc | AltConf |
|-----|-------|----------|-------|----|----|---|---|---------|---------|
|     |       |          | Total | C  | H  | N | O |         |         |
| 14  | X     | 1        | 117   | 46 | 58 | 4 | 9 | 0       | 0       |

- Molecule 15 is a ligand with the chemical component id POU but its atom names do not match the existing wwPDB Chemical Component Dictionary definition for POU. Consequently no firm identification of ligand chemistry can be made. Once the structure is annotated then an identification and diagram will be given here.

| Mol | Chain | Residues | Atoms |    |    |    | ZeroOcc | AltConf |
|-----|-------|----------|-------|----|----|----|---------|---------|
|     |       |          | Total | C  | H  | O  |         |         |
| 15  | X     | 1        | 86    | 27 | 48 | 11 | 0       | 0       |

- Molecule 16 is a ligand with the chemical component id ANS but its atom names do not match the existing wwPDB Chemical Component Dictionary definition for ANS. Consequently no firm identification of ligand chemistry can be made. Once the structure is annotated then an identification and diagram will be given here.

| Mol | Chain | Residues | Atoms |    |    |    |   | ZeroOcc | AltConf |   |
|-----|-------|----------|-------|----|----|----|---|---------|---------|---|
|     |       |          | Total | C  | Cl | H  | N |         |         | O |
| 16  | X     | 1        | 87    | 32 | 1  | 43 | 2 | 9       | 0       | 0 |

- Molecule 17 is water.

| Mol | Chain | Residues | Atoms |     | ZeroOcc | AltConf |
|-----|-------|----------|-------|-----|---------|---------|
|     |       |          | Total | O   |         |         |
| 17  | S     | 126      | 126   | 126 | 0       | 0       |

### 3 Residue-property plots

These plots are drawn for all protein, RNA, DNA and oligosaccharide chains in the entry. The first graphic for a chain summarises the proportions of the various outlier classes displayed in the second graphic. The second graphic shows the sequence view annotated by issues in geometry. Residues are color-coded according to the number of geometric quality criteria for which they contain at least one outlier: green = 0, yellow = 1, orange = 2 and red = 3 or more. Stretches of 2 or more consecutive residues without any outlier are shown as a green connector. Residues present in the sample, but not in the model, are shown in grey.

- Molecule 1: Tubulin alpha-1B chain

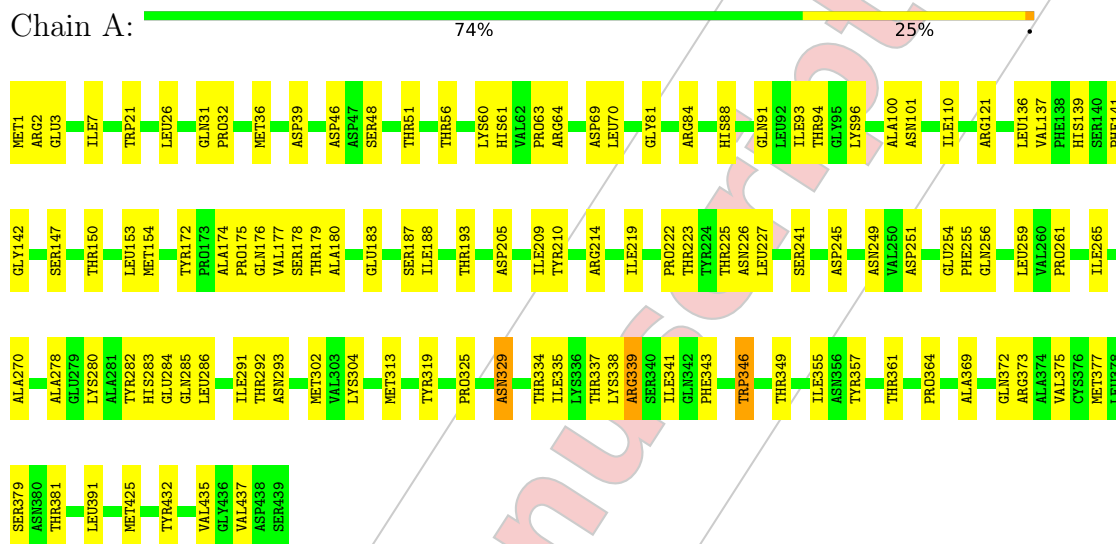

- Molecule 2: Tubulin beta-2B chain

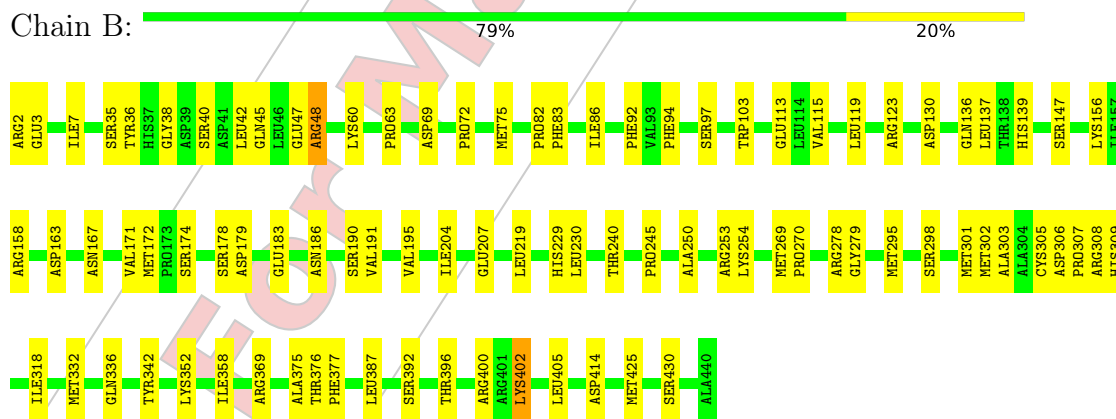

- Molecule 3: Tubulin alpha-1B chain

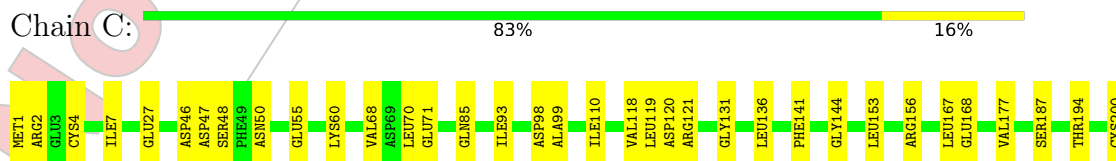

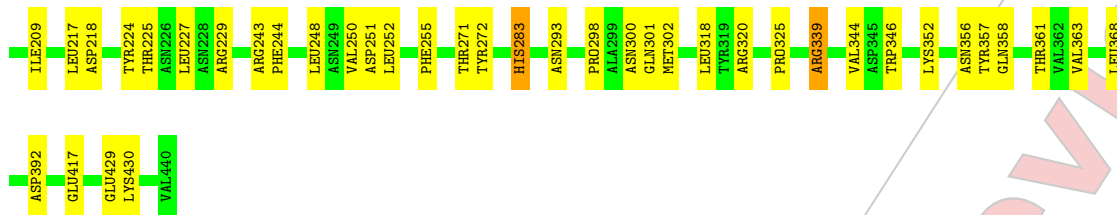

• Molecule 4: Tubulin beta-2B chain

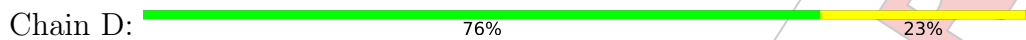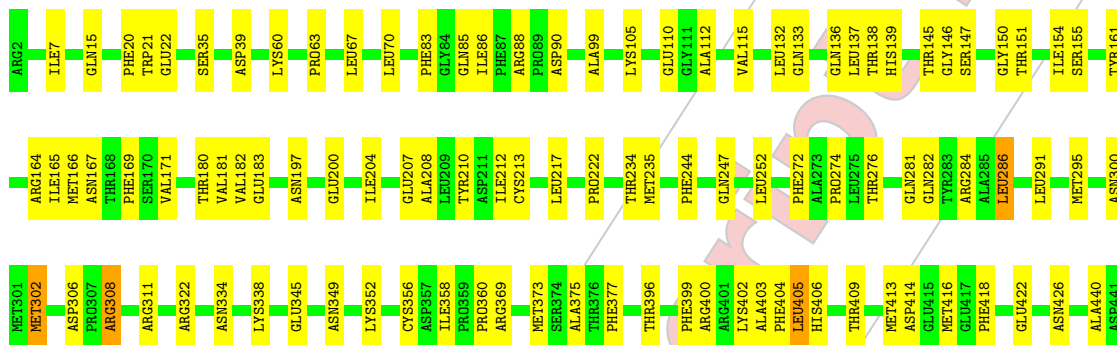

• Molecule 5: Stathmin-4

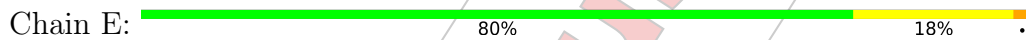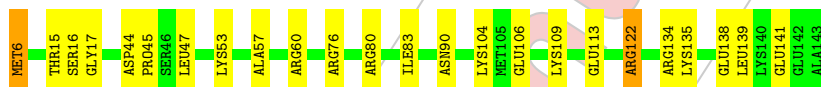

• Molecule 6: Tubulin-Tyrosine Ligase

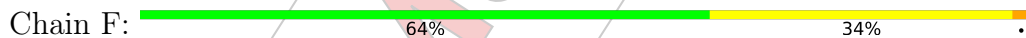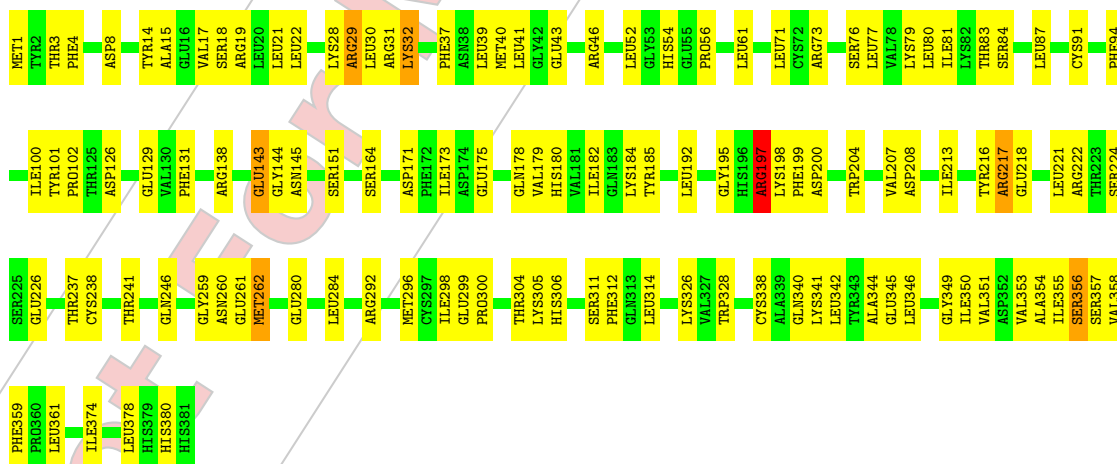

## 4 Data and refinement statistics i

| Property                                                                | Value                                                       | Source           |
|-------------------------------------------------------------------------|-------------------------------------------------------------|------------------|
| Space group                                                             | P 21 21 21                                                  | Depositor        |
| Cell constants<br>a, b, c, $\alpha$ , $\beta$ , $\gamma$                | 107.00Å 160.34Å 181.92Å<br>90.00° 90.00° 90.00°             | Depositor        |
| Resolution (Å)                                                          | 15.29 – 2.50<br>15.29 – 1.90                                | Depositor<br>EDS |
| % Data completeness<br>(in resolution range)                            | 99.9 (15.29-2.50)<br>74.4 (15.29-1.90)                      | Depositor<br>EDS |
| $R_{merge}$                                                             | (Not available)                                             | Depositor        |
| $R_{sym}$                                                               | (Not available)                                             | Depositor        |
| $\langle I/\sigma(I) \rangle$ <sup>1</sup>                              | 7.04 (at 1.90Å)                                             | Xtrriage         |
| Refinement program                                                      | .                                                           | Depositor        |
| R, $R_{free}$                                                           | 0.185 , 0.239<br>0.199 , 0.252                              | Depositor<br>DCC |
| $R_{free}$ test set                                                     | 1990 reflections (1.09%)                                    | wwPDB-VP         |
| Wilson B-factor (Å <sup>2</sup> )                                       | -7.5                                                        | Xtrriage         |
| Anisotropy                                                              | -0.100                                                      | Xtrriage         |
| Bulk solvent $k_{sol}$ (e/Å <sup>3</sup> ), $B_{sol}$ (Å <sup>2</sup> ) | 0.34 , 66.6                                                 | EDS              |
| L-test for twinning <sup>2</sup>                                        | $\langle  L  \rangle = 0.50$ , $\langle L^2 \rangle = 0.33$ | Xtrriage         |
| Estimated twinning fraction                                             | No twinning to report.                                      | Xtrriage         |
| $F_o, F_c$ correlation                                                  | 0.64                                                        | EDS              |
| Total number of atoms                                                   | 18174                                                       | wwPDB-VP         |
| Average B, all atoms (Å <sup>2</sup> )                                  | 79.0                                                        | wwPDB-VP         |

Xtrriage's analysis on translational NCS is as follows: *The largest off-origin peak in the Patterson function is 2.74% of the height of the origin peak. No significant pseudotranslation is detected.*

<sup>1</sup>Intensities estimated from amplitudes.

<sup>2</sup>Theoretical values of  $\langle |L| \rangle$ ,  $\langle L^2 \rangle$  for acentric reflections are 0.5, 0.333 respectively for untwinned datasets, and 0.375, 0.2 for perfectly twinned datasets.

## 5 Model quality [i](#)

### 5.1 Standard geometry [i](#)

Bond lengths and bond angles in the following residue types are not validated in this section: ACP, ANS, COL, CA, EPA, VLB, GTP, MG, POU, GDP

The Z score for a bond length (or angle) is the number of standard deviations the observed value is removed from the expected value. A bond length (or angle) with  $|Z| > 5$  is considered an outlier worth inspection. RMSZ is the root-mean-square of all Z scores of the bond lengths (or angles).

| Mol | Chain | Bond lengths |         | Bond angles |         |
|-----|-------|--------------|---------|-------------|---------|
|     |       | RMSZ         | # Z  >5 | RMSZ        | # Z  >5 |
| 1   | A     | 0.31         | 0/3517  | 0.52        | 0/4772  |
| 2   | B     | 0.33         | 0/3463  | 0.54        | 0/4690  |
| 3   | C     | 0.33         | 0/3550  | 0.54        | 0/4817  |
| 4   | D     | 0.31         | 0/3449  | 0.52        | 0/4671  |
| 5   | E     | 0.28         | 0/1028  | 0.46        | 0/1364  |
| 6   | F     | 0.31         | 0/2777  | 0.50        | 0/3750  |
| All | All   | 0.31         | 0/17784 | 0.52        | 0/24064 |

Chiral center outliers are detected by calculating the chiral volume of a chiral center and verifying if the center is modelled as a planar moiety or with the opposite hand. A planarity outlier is detected by checking planarity of atoms in a peptide group, atoms in a mainchain group or atoms of a sidechain that are expected to be planar.

| Mol | Chain | #Chirality outliers | #Planarity outliers |
|-----|-------|---------------------|---------------------|
| 4   | D     | 0                   | 1                   |
| 5   | E     | 0                   | 1                   |
| 6   | F     | 0                   | 3                   |
| All | All   | 0                   | 5                   |

There are no bond length outliers.

There are no bond angle outliers.

There are no chirality outliers.

All (5) planarity outliers are listed below:

| Mol | Chain | Res | Type | Group     |
|-----|-------|-----|------|-----------|
| 4   | D     | 311 | ARG  | Sidechain |
| 5   | E     | 122 | ARG  | Sidechain |
| 6   | F     | 197 | ARG  | Sidechain |
| 6   | F     | 29  | ARG  | Sidechain |

*Continued on next page...*

Continued from previous page...

| Mol | Chain | Res | Type | Group     |
|-----|-------|-----|------|-----------|
| 6   | F     | 31  | ARG  | Sidechain |

## 5.2 Too-close contacts [i](#)

In the following table, the Non-H and H(model) columns list the number of non-hydrogen atoms and hydrogen atoms in the chain respectively. The H(added) column lists the number of hydrogen atoms added and optimized by MolProbity. The Clashes column lists the number of clashes within the asymmetric unit, whereas Symm-Clashes lists symmetry-related clashes.

| Mol | Chain | Non-H | H(model) | H(added) | Clashes | Symm-Clashes |
|-----|-------|-------|----------|----------|---------|--------------|
| 1   | A     | 3441  | 0        | 3340     | 101     | 0            |
| 2   | B     | 3386  | 0        | 3254     | 77      | 1            |
| 3   | C     | 3464  | 0        | 3364     | 60      | 1            |
| 4   | D     | 3376  | 0        | 3241     | 86      | 0            |
| 5   | E     | 1020  | 0        | 1033     | 21      | 0            |
| 6   | F     | 2714  | 0        | 2682     | 94      | 0            |
| 7   | X     | 64    | 0        | 24       | 0       | 0            |
| 8   | X     | 4     | 0        | 0        | 0       | 0            |
| 9   | X     | 2     | 0        | 0        | 0       | 0            |
| 10  | X     | 56    | 0        | 24       | 0       | 0            |
| 11  | X     | 31    | 0        | 14       | 0       | 0            |
| 12  | X     | 29    | 25       | 0        | 3       | 0            |
| 13  | X     | 68    | 78       | 32       | 7       | 0            |
| 14  | X     | 59    | 58       | 58       | 5       | 0            |
| 15  | X     | 38    | 48       | 15       | 2       | 0            |
| 16  | X     | 44    | 43       | 2        | 3       | 0            |
| 17  | S     | 126   | 0        | 0        | 9       | 0            |
| All | All   | 17922 | 252      | 17083    | 424     | 1            |

The all-atom clashscore is defined as the number of clashes found per 1000 atoms (including hydrogen atoms). The all-atom clashscore for this structure is 12.

All (424) close contacts within the same asymmetric unit are listed below, sorted by their clash magnitude.

| Atom-1           | Atom-2           | Interatomic distance (Å) | Clash overlap (Å) |
|------------------|------------------|--------------------------|-------------------|
| 2:B:40:SER:OG    | 2:B:42:LEU:HD13  | 1.56                     | 1.05              |
| 6:F:304:THR:HG21 | 6:F:311:SER:HB2  | 1.40                     | 1.03              |
| 6:F:100:ILE:HG13 | 6:F:182:ILE:HD12 | 1.41                     | 1.01              |
| 2:B:396:THR:O    | 2:B:400:ARG:HG3  | 1.58                     | 1.01              |
| 6:F:14:TYR:HA    | 6:F:17:VAL:HG12  | 1.49                     | 0.95              |

Continued on next page...

Continued from previous page...

| Atom-1           | Atom-2           | Interatomic distance (Å) | Clash overlap (Å) |
|------------------|------------------|--------------------------|-------------------|
| 1:A:285:GLN:HE21 | 1:A:372:GLN:HG2  | 1.35                     | 0.91              |
| 2:B:230:LEU:HD23 | 13:X:508:EPA:H81 | 1.50                     | 0.91              |
| 4:D:137:LEU:HD23 | 4:D:139:HIS:CD2  | 2.06                     | 0.90              |
| 2:B:40:SER:HG    | 2:B:42:LEU:HD13  | 1.36                     | 0.88              |
| 2:B:75:MET:HG3   | 2:B:94:PHE:CD2   | 2.08                     | 0.87              |
| 2:B:115:VAL:O    | 2:B:119:LEU:HD23 | 1.75                     | 0.86              |
| 4:D:137:LEU:CD2  | 4:D:139:HIS:CD2  | 2.59                     | 0.86              |
| 4:D:137:LEU:CD2  | 4:D:139:HIS:HD2  | 1.88                     | 0.84              |
| 2:B:83:PHE:O     | 2:B:86:ILE:HG22  | 1.78                     | 0.84              |
| 6:F:192:LEU:HD11 | 6:F:262:MET:HE1  | 1.59                     | 0.83              |
| 5:E:104:LYS:HE2  | 17:S:197:HOH:O   | 1.78                     | 0.83              |
| 3:C:293:ASN:ND2  | 3:C:339:ARG:HH12 | 1.78                     | 0.81              |
| 2:B:240:THR:HB   | 2:B:318:ILE:CD1  | 2.11                     | 0.80              |
| 1:A:285:GLN:NE2  | 1:A:372:GLN:HG2  | 1.96                     | 0.80              |
| 4:D:137:LEU:HD23 | 4:D:139:HIS:HD2  | 1.48                     | 0.77              |
| 3:C:271:THR:HG23 | 3:C:300:ASN:O    | 1.86                     | 0.75              |
| 4:D:83:PHE:O     | 4:D:86:ILE:HG22  | 1.86                     | 0.75              |
| 1:A:93:ILE:HD11  | 1:A:121:ARG:HG3  | 1.67                     | 0.74              |
| 4:D:358:ILE:O    | 4:D:358:ILE:HD12 | 1.88                     | 0.72              |
| 2:B:47:GLU:HG2   | 2:B:245:PRO:HG3  | 1.70                     | 0.72              |
| 4:D:208:ALA:O    | 4:D:212:ILE:HG12 | 1.88                     | 0.72              |
| 6:F:131:PHE:CE2  | 6:F:182:ILE:HG21 | 2.25                     | 0.72              |
| 1:A:372:GLN:HA   | 1:A:372:GLN:NE2  | 2.05                     | 0.71              |
| 6:F:340:GLN:CD   | 6:F:340:GLN:H    | 1.93                     | 0.71              |
| 6:F:39:LEU:HD23  | 6:F:40:MET:N     | 2.06                     | 0.71              |
| 1:A:291:ILE:HD12 | 1:A:375:VAL:HG23 | 1.73                     | 0.71              |
| 6:F:280:GLU:HA   | 6:F:284:LEU:HB2  | 1.73                     | 0.71              |
| 6:F:171:ASP:O    | 6:F:175:GLU:HG2  | 1.89                     | 0.71              |
| 2:B:392:SER:O    | 2:B:396:THR:HG23 | 1.90                     | 0.70              |
| 4:D:406:HIS:HA   | 4:D:409:THR:CG2  | 2.21                     | 0.70              |
| 6:F:39:LEU:HD21  | 6:F:41:LEU:HD23  | 1.73                     | 0.70              |
| 4:D:406:HIS:HA   | 4:D:409:THR:HG22 | 1.72                     | 0.70              |
| 2:B:219:LEU:HD21 | 13:X:508:EPA:H21 | 1.74                     | 0.70              |
| 4:D:35:SER:OG    | 4:D:60:LYS:HE3   | 1.92                     | 0.70              |
| 6:F:226:GLU:HB2  | 6:F:238:CYS:HB3  | 1.73                     | 0.69              |
| 1:A:339:ARG:HB3  | 1:A:341:ILE:CD1  | 2.22                     | 0.69              |
| 2:B:240:THR:HB   | 2:B:318:ILE:HD11 | 1.74                     | 0.69              |
| 2:B:352:LYS:HG3  | 12:X:507:COL:C4  | 2.23                     | 0.69              |
| 4:D:402:LYS:CA   | 4:D:405:LEU:HD11 | 2.23                     | 0.68              |
| 2:B:308:ARG:HG2  | 15:X:510:POU:H47 | 1.74                     | 0.68              |
| 4:D:136:GLN:HA   | 4:D:167:ASN:O    | 1.94                     | 0.68              |

Continued on next page...

Continued from previous page...

| Atom-1            | Atom-2            | Interatomic distance (Å) | Clash overlap (Å) |
|-------------------|-------------------|--------------------------|-------------------|
| 6:F:143:GLU:HG3   | 6:F:144:GLY:N     | 2.07                     | 0.68              |
| 4:D:180:THR:O     | 4:D:183:GLU:HG3   | 1.94                     | 0.68              |
| 3:C:209:ILE:HD11  | 3:C:302:MET:SD    | 2.34                     | 0.68              |
| 1:A:223:THR:HG22  | 1:A:226:ASN:OD1   | 1.94                     | 0.67              |
| 6:F:304:THR:CG2   | 6:F:311:SER:HB2   | 2.21                     | 0.66              |
| 3:C:177:VAL:HG12  | 3:C:177:VAL:O     | 1.95                     | 0.66              |
| 6:F:138:ARG:HB2   | 6:F:145:ASN:HD21  | 1.61                     | 0.65              |
| 1:A:339:ARG:HB3   | 1:A:341:ILE:HD12  | 1.78                     | 0.65              |
| 2:B:156:LYS:HE2   | 5:E:76:ARG:NE     | 2.10                     | 0.65              |
| 6:F:195:GLY:HA3   | 6:F:197:ARG:HD3   | 1.79                     | 0.65              |
| 6:F:341:LYS:HD2   | 6:F:341:LYS:O     | 1.96                     | 0.65              |
| 2:B:179:ASP:HB3   | 3:C:352:LYS:HG3   | 1.79                     | 0.64              |
| 1:A:334:THR:O     | 1:A:337:THR:HG22  | 1.96                     | 0.64              |
| 2:B:136:GLN:HA    | 2:B:167:ASN:O     | 1.97                     | 0.64              |
| 14:X:509:VLB:H511 | 14:X:509:VLB:H763 | 1.79                     | 0.64              |
| 3:C:4[B]:CYS:SG   | 3:C:136:LEU:HG    | 2.37                     | 0.64              |
| 2:B:158:ARG:HD3   | 17:S:105:HOH:O    | 1.97                     | 0.63              |
| 1:A:210:TYR:CE1   | 1:A:222:PRO:HD2   | 2.33                     | 0.63              |
| 1:A:251:ASP:OD1   | 1:A:254:GLU:HG3   | 1.97                     | 0.63              |
| 4:D:244:PHE:CD2   | 4:D:358:ILE:HD11  | 2.34                     | 0.63              |
| 4:D:402:LYS:HB3   | 4:D:405:LEU:HD11  | 1.81                     | 0.63              |
| 6:F:178:GLN:HA    | 6:F:178:GLN:OE1   | 1.98                     | 0.63              |
| 1:A:372:GLN:HA    | 1:A:372:GLN:HE21  | 1.63                     | 0.62              |
| 6:F:138:ARG:HD2   | 6:F:145:ASN:OD1   | 1.99                     | 0.62              |
| 6:F:151:SER:HB2   | 6:F:179:VAL:O     | 2.00                     | 0.62              |
| 4:D:295:MET:HG3   | 4:D:377:PHE:HB2   | 1.80                     | 0.62              |
| 1:A:223:THR:HG23  | 1:A:225:THR:N     | 2.14                     | 0.62              |
| 2:B:298:SER:HB2   | 2:B:307:PRO:HD2   | 1.81                     | 0.61              |
| 1:A:223:THR:HG23  | 1:A:225:THR:H     | 1.64                     | 0.61              |
| 6:F:1:MET:CE      | 6:F:28:LYS:HB2    | 2.30                     | 0.61              |
| 4:D:334:ASN:OD1   | 4:D:338:LYS:HE2   | 2.00                     | 0.61              |
| 6:F:87:LEU:O      | 6:F:91:CYS:HB2    | 1.99                     | 0.61              |
| 6:F:14:TYR:CA     | 6:F:17:VAL:HG12   | 2.27                     | 0.61              |
| 6:F:192:LEU:HD11  | 6:F:262:MET:CE    | 2.29                     | 0.61              |
| 2:B:369:ARG:HG3   | 2:B:369:ARG:HH11  | 1.66                     | 0.60              |
| 1:A:335:ILE:O     | 1:A:339:ARG:HB2   | 2.01                     | 0.60              |
| 2:B:69:ASP:O      | 2:B:94:PHE:HA     | 2.02                     | 0.60              |
| 1:A:261:PRO:HD2   | 17:S:194:HOH:O    | 2.02                     | 0.60              |
| 5:E:44:ASP:HB3    | 5:E:45:PRO:HD2    | 1.84                     | 0.59              |
| 4:D:286:LEU:HD12  | 4:D:286:LEU:O     | 2.01                     | 0.59              |
| 6:F:101:TYR:HD2   | 6:F:126:ASP:HB2   | 1.67                     | 0.59              |

Continued on next page...

*Continued from previous page...*

| Atom-1             | Atom-2              | Interatomic distance (Å) | Clash overlap (Å) |
|--------------------|---------------------|--------------------------|-------------------|
| 4:D:405:LEU:HD12   | 4:D:405:LEU:H       | 1.66                     | 0.59              |
| 3:C:320:ARG:HA     | 3:C:356:ASN:O       | 2.03                     | 0.59              |
| 3:C:177:VAL:HG11   | 3:C:224:TYR:CE1     | 2.38                     | 0.59              |
| 4:D:402:LYS:HB3    | 4:D:405:LEU:CD1     | 2.33                     | 0.59              |
| 1:A:70:LEU:HD13    | 1:A:110:ILE:HG21    | 1.84                     | 0.58              |
| 2:B:40:SER:OG      | 2:B:42:LEU:CD1      | 2.42                     | 0.58              |
| 4:D:132:LEU:O      | 4:D:164:ARG:NH1     | 2.36                     | 0.58              |
| 1:A:137:VAL:HG21   | 1:A:154:MET:HE1     | 1.85                     | 0.58              |
| 4:D:63:PRO:HD3     | 4:D:86:ILE:HG12     | 1.86                     | 0.58              |
| 2:B:191:VAL:O      | 2:B:195:VAL:HG13    | 2.04                     | 0.58              |
| 3:C:1:MET:HG2      | 3:C:2:ARG:H         | 1.68                     | 0.58              |
| 6:F:345:GLU:CG     | 6:F:374:ILE:HG21    | 2.33                     | 0.58              |
| 1:A:293:ASN:OD1    | 1:A:339:ARG:NH1     | 2.37                     | 0.58              |
| 6:F:217:ARG:HG3    | 6:F:218:GLU:HG2     | 1.84                     | 0.58              |
| 1:A:174:ALA:HB3    | 1:A:177:VAL:HG23    | 1.86                     | 0.57              |
| 3:C:229[B]:ARG:HD3 | 3:C:363:VAL:HG21    | 1.86                     | 0.57              |
| 3:C:248:LEU:HD12   | 3:C:357:TYR:OH      | 2.04                     | 0.57              |
| 4:D:154:ILE:HG23   | 4:D:166:MET:HG2     | 1.85                     | 0.57              |
| 2:B:295:MET:SD     | 2:B:375:ALA:HB1     | 2.44                     | 0.57              |
| 3:C:48:SER:HB3     | 3:C:243:ARG:O       | 2.04                     | 0.57              |
| 6:F:14:TYR:HA      | 6:F:17:VAL:CG1      | 2.30                     | 0.57              |
| 1:A:209:ILE:HD11   | 1:A:302:MET:SD      | 2.45                     | 0.57              |
| 6:F:131:PHE:HE2    | 6:F:182:ILE:HG21    | 1.67                     | 0.57              |
| 1:A:1:MET:HA       | 1:A:1:MET:CE        | 2.34                     | 0.57              |
| 1:A:261:PRO:HG2    | 1:A:313:MET:HB3     | 1.87                     | 0.56              |
| 1:A:175:PRO:HA     | 1:A:179:THR:HG22    | 1.87                     | 0.56              |
| 3:C:27:GLU:HG2     | 3:C:361:THR:CG2     | 2.35                     | 0.56              |
| 3:C:224:TYR:HE2    | 4:D:247[A]:GLN:HE22 | 1.52                     | 0.56              |
| 3:C:244:PHE:CZ     | 3:C:358:GLN:HG2     | 2.40                     | 0.56              |
| 4:D:171:VAL:HA     | 4:D:204:ILE:O       | 2.06                     | 0.56              |
| 4:D:244:PHE:CE2    | 4:D:358:ILE:HD11    | 2.40                     | 0.56              |
| 1:A:26:LEU:HD21    | 1:A:364:PRO:HD3     | 1.86                     | 0.56              |
| 6:F:184:LYS:HD2    | 6:F:185:TYR:N       | 2.20                     | 0.56              |
| 6:F:19:ARG:HD3     | 6:F:19:ARG:N        | 2.20                     | 0.56              |
| 4:D:137:LEU:HD21   | 4:D:139:HIS:CD2     | 2.40                     | 0.55              |
| 1:A:255:PHE:O      | 1:A:259:LEU:HB2     | 2.06                     | 0.55              |
| 2:B:278:ARG:HG3    | 2:B:279:GLY:HA3     | 1.89                     | 0.55              |
| 3:C:93:ILE:HD11    | 3:C:121:ARG:HG3     | 1.88                     | 0.55              |
| 6:F:296[A]:MET:SD  | 6:F:380:HIS:ND1     | 2.80                     | 0.55              |
| 1:A:214:ARG:HG2    | 1:A:219:ILE:O       | 2.07                     | 0.55              |
| 3:C:70:LEU:HD13    | 3:C:110:ILE:CG2     | 2.37                     | 0.55              |

*Continued on next page...*

Continued from previous page...

| Atom-1            | Atom-2             | Interatomic distance (Å) | Clash overlap (Å) |
|-------------------|--------------------|--------------------------|-------------------|
| 1:A:319:TYR:CD1   | 1:A:375:VAL:HG22   | 2.42                     | 0.55              |
| 3:C:167:LEU:HD22  | 3:C:200:CYS:HB3    | 1.88                     | 0.55              |
| 6:F:14:TYR:HD1    | 6:F:17:VAL:HG11    | 1.72                     | 0.55              |
| 4:D:402:LYS:CB    | 4:D:405:LEU:HD11   | 2.37                     | 0.55              |
| 6:F:200:ASP:OD1   | 6:F:222:ARG:HB2    | 2.07                     | 0.55              |
| 5:E:6:MET:O       | 5:E:6:MET:HG3      | 2.06                     | 0.55              |
| 6:F:358:VAL:HG23  | 6:F:359:PHE:CD2    | 2.41                     | 0.55              |
| 1:A:48:SER:O      | 1:A:51:THR:HG23    | 2.06                     | 0.55              |
| 6:F:39:LEU:CD2    | 6:F:41:LEU:HD23    | 2.37                     | 0.54              |
| 6:F:39:LEU:HD21   | 6:F:41:LEU:CD2     | 2.37                     | 0.54              |
| 1:A:177:VAL:O     | 1:A:177:VAL:HG22   | 2.08                     | 0.54              |
| 2:B:171:VAL:HA    | 2:B:204:ILE:O      | 2.08                     | 0.54              |
| 2:B:240:THR:CB    | 2:B:318:ILE:HD11   | 2.37                     | 0.54              |
| 6:F:259:GLY:O     | 6:F:261:GLU:HG3    | 2.08                     | 0.54              |
| 4:D:70:LEU:HG     | 4:D:145:THR:HG23   | 1.89                     | 0.54              |
| 6:F:213:ILE:HG22  | 6:F:378:LEU:HD12   | 1.88                     | 0.54              |
| 1:A:26:LEU:HD21   | 1:A:364:PRO:CD     | 2.38                     | 0.53              |
| 1:A:338:LYS:O     | 1:A:338:LYS:HG2    | 2.09                     | 0.53              |
| 1:A:56:THR:HG21   | 1:A:60:LYS:HB3     | 1.91                     | 0.53              |
| 2:B:48:ARG:HH21   | 2:B:245:PRO:HA     | 1.72                     | 0.53              |
| 6:F:292:ARG:O     | 6:F:296[B]:MET:HB2 | 2.08                     | 0.53              |
| 1:A:293:ASN:HD21  | 1:A:339:ARG:HH12   | 1.55                     | 0.53              |
| 3:C:209:ILE:HG22  | 3:C:227:LEU:HD22   | 1.91                     | 0.53              |
| 4:D:405:LEU:O     | 4:D:409:THR:HG22   | 2.07                     | 0.53              |
| 14:X:509:VLB:H262 | 14:X:509:VLB:N1    | 2.24                     | 0.53              |
| 6:F:102:PRO:HB3   | 6:F:173:ILE:O      | 2.09                     | 0.53              |
| 1:A:377:MET:HE3   | 1:A:379:SER:HB3    | 1.90                     | 0.53              |
| 1:A:3:GLU:HG2     | 1:A:64:ARG:NH2     | 2.24                     | 0.53              |
| 3:C:7:ILE:HG21    | 3:C:153:LEU:HD21   | 1.91                     | 0.53              |
| 3:C:27:GLU:HG2    | 3:C:361:THR:HG22   | 1.91                     | 0.53              |
| 3:C:417:GLU:HB3   | 17:S:35:HOH:O      | 2.08                     | 0.53              |
| 1:A:56:THR:CG2    | 1:A:60:LYS:HB3     | 2.39                     | 0.53              |
| 3:C:293:ASN:HD21  | 3:C:339:ARG:HH12   | 1.53                     | 0.52              |
| 4:D:67:LEU:N      | 4:D:67:LEU:HD12    | 2.24                     | 0.52              |
| 3:C:251:ASP:OD1   | 3:C:252:LEU:N      | 2.42                     | 0.52              |
| 4:D:276:THR:OG1   | 4:D:281:GLN:HG2    | 2.09                     | 0.52              |
| 1:A:180:ALA:O     | 1:A:183:GLU:HG3    | 2.10                     | 0.52              |
| 2:B:369:ARG:HG3   | 2:B:369:ARG:NH1    | 2.21                     | 0.52              |
| 3:C:71:GLU:HG2    | 3:C:98:ASP:HB3     | 1.92                     | 0.52              |
| 4:D:360:PRO:C     | 4:D:369:ARG:HA     | 2.30                     | 0.52              |
| 5:E:109:LYS:HE2   | 5:E:113:GLU:OE2    | 2.10                     | 0.52              |

Continued on next page...

Continued from previous page...

| Atom-1           | Atom-2           | Interatomic distance (Å) | Clash overlap (Å) |
|------------------|------------------|--------------------------|-------------------|
| 1:A:21:TRP:CZ3   | 1:A:63:PRO:HB3   | 2.44                     | 0.52              |
| 2:B:219:LEU:HD21 | 13:X:508:EPA:C2  | 2.39                     | 0.52              |
| 2:B:318:ILE:HG23 | 2:B:376:THR:HB   | 1.90                     | 0.52              |
| 6:F:73:ARG:HB2   | 6:F:76:SER:OG    | 2.09                     | 0.52              |
| 2:B:36:TYR:CE1   | 2:B:38:GLY:HA3   | 2.45                     | 0.51              |
| 4:D:295:MET:CG   | 4:D:377:PHE:HB2  | 2.39                     | 0.51              |
| 4:D:396:THR:O    | 4:D:400:ARG:HB2  | 2.10                     | 0.51              |
| 6:F:213:ILE:CG2  | 6:F:378:LEU:HD12 | 2.40                     | 0.51              |
| 3:C:244:PHE:CE1  | 3:C:358:GLN:HG2  | 2.45                     | 0.51              |
| 4:D:403:ALA:O    | 4:D:404:PHE:HB2  | 2.09                     | 0.51              |
| 4:D:404:PHE:HE2  | 16:X:517:ANS:C3  | 2.24                     | 0.51              |
| 2:B:156:LYS:HE2  | 5:E:76:ARG:CZ    | 2.40                     | 0.51              |
| 6:F:129:GLU:OE1  | 6:F:129:GLU:HA   | 2.10                     | 0.51              |
| 1:A:101:ASN:ND2  | 2:B:254:LYS:HE2  | 2.25                     | 0.51              |
| 3:C:271:THR:HG22 | 3:C:272:TYR:N    | 2.25                     | 0.51              |
| 4:D:402:LYS:HA   | 4:D:405:LEU:HD11 | 1.93                     | 0.51              |
| 6:F:222:ARG:O    | 6:F:241:THR:HB   | 2.10                     | 0.51              |
| 3:C:177:VAL:CG1  | 3:C:224:TYR:CE1  | 2.94                     | 0.51              |
| 6:F:346:LEU:O    | 6:F:350:ILE:HG13 | 2.11                     | 0.50              |
| 2:B:82:PRO:O     | 2:B:83:PHE:HB2   | 2.11                     | 0.50              |
| 14:X:509:VLB:C73 | 14:X:509:VLB:O32 | 2.59                     | 0.50              |
| 1:A:172:TYR:HB3  | 1:A:205:ASP:HA   | 1.93                     | 0.50              |
| 4:D:213:CYS:HA   | 4:D:217:LEU:HB2  | 1.93                     | 0.50              |
| 2:B:63:PRO:HD3   | 2:B:86:ILE:HG12  | 1.94                     | 0.50              |
| 6:F:3:THR:OG1    | 6:F:37:PHE:HA    | 2.11                     | 0.50              |
| 4:D:165:ILE:HG21 | 4:D:252:LEU:HB3  | 1.93                     | 0.50              |
| 1:A:282:TYR:O    | 1:A:283:HIS:HB2  | 2.11                     | 0.50              |
| 3:C:60:LYS:HB2   | 3:C:60:LYS:NZ    | 2.25                     | 0.50              |
| 4:D:360:PRO:C    | 4:D:369:ARG:CA   | 2.80                     | 0.50              |
| 1:A:56:THR:CG2   | 1:A:60:LYS:H     | 2.23                     | 0.50              |
| 1:A:209:ILE:HG22 | 1:A:227:LEU:HD22 | 1.94                     | 0.50              |
| 1:A:136:LEU:HD12 | 1:A:136:LEU:N    | 2.27                     | 0.50              |
| 1:A:175:PRO:HA   | 1:A:179:THR:CG2  | 2.42                     | 0.49              |
| 3:C:271:THR:HG22 | 3:C:272:TYR:H    | 1.76                     | 0.49              |
| 4:D:7:ILE:O      | 4:D:137:LEU:HA   | 2.11                     | 0.49              |
| 2:B:97:SER:O     | 3:C:2:ARG:NH2    | 2.46                     | 0.49              |
| 1:A:100:ALA:HA   | 2:B:254:LYS:HG3  | 1.95                     | 0.49              |
| 1:A:343:PHE:CD1  | 1:A:349:THR:HG23 | 2.48                     | 0.49              |
| 2:B:42:LEU:C     | 2:B:45:GLN:N     | 2.66                     | 0.49              |
| 5:E:80:ARG:HA    | 5:E:83:ILE:HG22  | 1.94                     | 0.49              |
| 4:D:181:VAL:HG22 | 16:X:517:ANS:O2  | 2.13                     | 0.49              |

Continued on next page...

Continued from previous page...

| Atom-1            | Atom-2           | Interatomic distance (Å) | Clash overlap (Å) |
|-------------------|------------------|--------------------------|-------------------|
| 6:F:4:PHE:O       | 6:F:29:ARG:HA    | 2.13                     | 0.49              |
| 6:F:18:SER:HA     | 6:F:21:LEU:HD12  | 1.94                     | 0.49              |
| 6:F:71:LEU:HD22   | 6:F:298:ILE:HD13 | 1.94                     | 0.49              |
| 14:X:509:VLB:H763 | 14:X:509:VLB:C51 | 2.42                     | 0.49              |
| 2:B:229:HIS:CE1   | 13:X:508:EPA:C9  | 2.96                     | 0.49              |
| 4:D:306:ASP:OD1   | 4:D:308:ARG:HB2  | 2.13                     | 0.49              |
| 6:F:344:ALA:O     | 6:F:346:LEU:N    | 2.42                     | 0.49              |
| 1:A:154:MET:HE2   | 1:A:154:MET:HA   | 1.94                     | 0.48              |
| 2:B:270:PRO:O     | 2:B:302:MET:HB2  | 2.13                     | 0.48              |
| 2:B:332:MET:O     | 2:B:336:GLN:HG3  | 2.13                     | 0.48              |
| 3:C:177:VAL:O     | 3:C:177:VAL:CG1  | 2.61                     | 0.48              |
| 4:D:21:TRP:CZ3    | 4:D:63:PRO:HB3   | 2.48                     | 0.48              |
| 6:F:61:LEU:HD22   | 6:F:358:VAL:HG21 | 1.95                     | 0.48              |
| 1:A:270:ALA:HB3   | 1:A:302:MET:HG3  | 1.95                     | 0.48              |
| 1:A:338:LYS:O     | 1:A:339:ARG:HD2  | 2.13                     | 0.48              |
| 2:B:305[B]:CYS:O  | 2:B:307:PRO:HD3  | 2.13                     | 0.48              |
| 1:A:245:ASP:O     | 5:E:16:SER:HB2   | 2.13                     | 0.48              |
| 6:F:198:LYS:HG2   | 6:F:199:PHE:H    | 1.79                     | 0.48              |
| 2:B:306:ASP:HB3   | 2:B:309:HIS:ND1  | 2.28                     | 0.48              |
| 4:D:112:ALA:HB1   | 5:E:134:ARG:HH21 | 1.77                     | 0.48              |
| 6:F:350:ILE:O     | 6:F:354:ALA:HB3  | 2.14                     | 0.48              |
| 1:A:70:LEU:HD13   | 1:A:110:ILE:CG2  | 2.43                     | 0.48              |
| 1:A:286:LEU:N     | 1:A:286:LEU:HD22 | 2.27                     | 0.48              |
| 1:A:36:MET:HG2    | 1:A:61:HIS:CE1   | 2.48                     | 0.48              |
| 3:C:325:PRO:HB3   | 14:X:509:VLB:C65 | 2.43                     | 0.48              |
| 6:F:79:LYS:O      | 6:F:83:THR:OG1   | 2.22                     | 0.48              |
| 1:A:56:THR:HG22   | 1:A:60:LYS:O     | 2.14                     | 0.48              |
| 2:B:172:MET:HG3   | 2:B:387:LEU:HD11 | 1.95                     | 0.48              |
| 1:A:346:TRP:HZ2   | 1:A:435:VAL:HG13 | 1.79                     | 0.48              |
| 3:C:298:PRO:HD2   | 17:S:136:HOH:O   | 2.13                     | 0.48              |
| 1:A:142:GLY:HA3   | 1:A:183:GLU:OE1  | 2.14                     | 0.47              |
| 1:A:265:ILE:HG23  | 1:A:432:TYR:CE1  | 2.49                     | 0.47              |
| 1:A:291:ILE:CD1   | 1:A:375:VAL:HG23 | 2.42                     | 0.47              |
| 2:B:269:MET:HE3   | 2:B:301:MET:HG3  | 1.95                     | 0.47              |
| 2:B:278:ARG:HG3   | 2:B:279:GLY:CA   | 2.44                     | 0.47              |
| 3:C:298:PRO:O     | 3:C:301:GLN:HG2  | 2.14                     | 0.47              |
| 4:D:356:CYS:SG    | 4:D:358:ILE:CD1  | 3.02                     | 0.47              |
| 2:B:42:LEU:HD22   | 2:B:358:ILE:HD11 | 1.96                     | 0.47              |
| 1:A:319:TYR:CE1   | 1:A:375:VAL:HG22 | 2.50                     | 0.47              |
| 4:D:146:GLY:O     | 4:D:150:GLY:HA3  | 2.15                     | 0.47              |
| 4:D:402:LYS:C     | 4:D:405:LEU:HD11 | 2.35                     | 0.47              |

Continued on next page...

Continued from previous page...

| Atom-1           | Atom-2           | Interatomic distance (Å) | Clash overlap (Å) |
|------------------|------------------|--------------------------|-------------------|
| 2:B:295:MET:HG3  | 2:B:377:PHE:HB2  | 1.97                     | 0.47              |
| 6:F:246:GLN:HG2  | 6:F:260:ASN:OD1  | 2.14                     | 0.47              |
| 4:D:86:ILE:HG12  | 4:D:86:ILE:O     | 2.14                     | 0.47              |
| 6:F:17:VAL:HG23  | 6:F:351:VAL:HG13 | 1.95                     | 0.47              |
| 2:B:119:LEU:HB3  | 2:B:123:ARG:NH1  | 2.29                     | 0.47              |
| 6:F:351:VAL:O    | 6:F:356:SER:HB2  | 2.15                     | 0.46              |
| 1:A:81:GLY:O     | 1:A:84:ARG:HD3   | 2.15                     | 0.46              |
| 6:F:32:LYS:HB2   | 6:F:32:LYS:HE3   | 1.72                     | 0.46              |
| 1:A:357:TYR:CE2  | 5:E:17:GLY:HA2   | 2.50                     | 0.46              |
| 4:D:70:LEU:H     | 4:D:145:THR:HG21 | 1.81                     | 0.46              |
| 6:F:19:ARG:N     | 6:F:19:ARG:CD    | 2.79                     | 0.46              |
| 2:B:35:SER:OG    | 2:B:60:LYS:HE2   | 2.15                     | 0.46              |
| 2:B:178:SER:OG   | 2:B:183:GLU:OE2  | 2.21                     | 0.46              |
| 4:D:105:LYS:HB3  | 4:D:110:GLU:HG3  | 1.98                     | 0.46              |
| 1:A:284:GLU:CD   | 1:A:284:GLU:H    | 2.20                     | 0.46              |
| 1:A:286:LEU:O    | 1:A:373:ARG:NH1  | 2.47                     | 0.46              |
| 2:B:72:PRO:O     | 2:B:75:MET:HB2   | 2.16                     | 0.46              |
| 2:B:352:LYS:HG3  | 12:X:507:COL:C5  | 2.46                     | 0.46              |
| 6:F:15:ALA:O     | 6:F:19:ARG:HD3   | 2.16                     | 0.46              |
| 6:F:19:ARG:HA    | 6:F:22:LEU:HD12  | 1.97                     | 0.46              |
| 4:D:413:MET:HE2  | 4:D:418:PHE:CE1  | 2.52                     | 0.45              |
| 6:F:28:LYS:HD3   | 6:F:30:LEU:HD21  | 1.96                     | 0.45              |
| 6:F:216:TYR:OH   | 6:F:342:LEU:HD22 | 2.17                     | 0.45              |
| 5:E:57:ALA:HA    | 5:E:60:ARG:NH1   | 2.32                     | 0.45              |
| 5:E:134:ARG:NH1  | 5:E:134:ARG:HG3  | 2.31                     | 0.45              |
| 5:E:135:LYS:O    | 5:E:139:LEU:HG   | 2.16                     | 0.45              |
| 6:F:262:MET:HB3  | 6:F:262:MET:HE3  | 1.64                     | 0.45              |
| 4:D:234:THR:OG1  | 4:D:302:MET:CE   | 2.64                     | 0.45              |
| 4:D:413:MET:CE   | 4:D:418:PHE:CE1  | 2.99                     | 0.45              |
| 1:A:137:VAL:HG21 | 1:A:154:MET:CE   | 2.46                     | 0.45              |
| 1:A:304:LYS:HB3  | 6:F:54:HIS:HE1   | 1.80                     | 0.45              |
| 4:D:70:LEU:HD12  | 4:D:99:ALA:HB2   | 1.98                     | 0.45              |
| 4:D:182:VAL:HG11 | 16:X:517:ANS:O6  | 2.17                     | 0.45              |
| 6:F:351:VAL:HG12 | 6:F:355:ILE:HD12 | 1.99                     | 0.45              |
| 2:B:42:LEU:O     | 2:B:45:GLN:N     | 2.50                     | 0.45              |
| 4:D:274:PRO:HB2  | 13:X:516:EPA:C24 | 2.46                     | 0.45              |
| 6:F:204:TRP:CZ2  | 6:F:338:CYS:HA   | 2.51                     | 0.45              |
| 2:B:250:ALA:HB1  | 12:X:507:COL:C12 | 2.46                     | 0.45              |
| 4:D:88:ARG:HD2   | 4:D:90:ASP:OD1   | 2.17                     | 0.45              |
| 2:B:174:SER:HB2  | 2:B:207:GLU:HB2  | 1.98                     | 0.45              |
| 6:F:173:ILE:HD13 | 6:F:180:HIS:HB2  | 1.99                     | 0.45              |

Continued on next page...

Continued from previous page...

| Atom-1             | Atom-2             | Interatomic distance (Å) | Clash overlap (Å) |
|--------------------|--------------------|--------------------------|-------------------|
| 1:A:26:LEU:CD2     | 1:A:364:PRO:HD3    | 2.47                     | 0.45              |
| 6:F:40:MET:CE      | 6:F:52:LEU:HD11    | 2.47                     | 0.45              |
| 1:A:3:GLU:HG2      | 1:A:64:ARG:CZ      | 2.47                     | 0.45              |
| 1:A:31:GLN:HB3     | 1:A:32:PRO:CD      | 2.47                     | 0.45              |
| 2:B:278:ARG:HA     | 2:B:279:GLY:HA2    | 1.64                     | 0.45              |
| 2:B:400:ARG:HD2    | 17:S:148:HOH:O     | 2.17                     | 0.45              |
| 4:D:413:MET:HE2    | 4:D:418:PHE:HE1    | 1.82                     | 0.45              |
| 2:B:303:ALA:O      | 2:B:305[A]:CYS:N   | 2.47                     | 0.44              |
| 2:B:342:TYR:CE2    | 15:X:510:POU:H45   | 2.52                     | 0.44              |
| 4:D:167:ASN:HD22   | 4:D:200:GLU:HB2    | 1.82                     | 0.44              |
| 3:C:141:PHE:HB3    | 3:C:187:SER:OG     | 2.17                     | 0.44              |
| 1:A:355:ILE:O      | 5:E:17:GLY:HA3     | 2.18                     | 0.44              |
| 1:A:337:THR:HG23   | 1:A:338:LYS:N      | 2.33                     | 0.44              |
| 3:C:250:VAL:HG23   | 3:C:255:PHE:CE2    | 2.53                     | 0.44              |
| 4:D:345:GLU:HG2    | 4:D:440:ALA:HB2    | 1.99                     | 0.44              |
| 1:A:176[B]:GLN:HB2 | 1:A:177:VAL:HG21   | 1.99                     | 0.44              |
| 3:C:344:VAL:HG21   | 3:C:346:TRP:CE2    | 2.53                     | 0.44              |
| 4:D:147:SER:O      | 4:D:151:THR:HG23   | 2.18                     | 0.44              |
| 4:D:276:THR:OG1    | 13:X:516:EPA:C24   | 2.66                     | 0.44              |
| 4:D:234:THR:OG1    | 4:D:302:MET:HE2    | 2.18                     | 0.44              |
| 4:D:244:PHE:CE2    | 4:D:358:ILE:CD1    | 3.01                     | 0.44              |
| 6:F:200:ASP:OD1    | 6:F:222:ARG:HD2    | 2.17                     | 0.44              |
| 1:A:292:THR:HG22   | 1:A:335:ILE:HG13   | 2.00                     | 0.43              |
| 3:C:224:TYR:HE2    | 4:D:247[A]:GLN:NE2 | 2.16                     | 0.43              |
| 4:D:138:THR:HG22   | 4:D:169:PHE:HB2    | 1.99                     | 0.43              |
| 2:B:119:LEU:HB3    | 2:B:123:ARG:HH12   | 1.83                     | 0.43              |
| 3:C:1:MET:CG       | 3:C:131:GLY:HA3    | 2.48                     | 0.43              |
| 3:C:85:GLN:HB2     | 17:S:182:HOH:O     | 2.18                     | 0.43              |
| 6:F:39:LEU:CD2     | 6:F:41:LEU:CD2     | 2.96                     | 0.43              |
| 6:F:326:LYS:HE2    | 6:F:328:TRP:CZ2    | 2.54                     | 0.43              |
| 1:A:325:PRO:O      | 1:A:329:ASN:OD1    | 2.36                     | 0.43              |
| 2:B:179:ASP:HB2    | 3:C:352:LYS:HZ2    | 1.83                     | 0.43              |
| 3:C:1:MET:HB2      | 3:C:1:MET:HE2      | 1.72                     | 0.43              |
| 3:C:47:ASP:O       | 3:C:50:ASN:HB2     | 2.18                     | 0.43              |
| 4:D:22:GLU:HG3     | 4:D:83:PHE:CD1     | 2.53                     | 0.43              |
| 6:F:226:GLU:HG3    | 6:F:237:THR:CG2    | 2.48                     | 0.43              |
| 3:C:251:ASP:HB3    | 17:S:34:HOH:O      | 2.18                     | 0.43              |
| 1:A:291:ILE:HD12   | 1:A:375:VAL:CG2    | 2.45                     | 0.43              |
| 3:C:217:LEU:HD21   | 3:C:368:LEU:HD23   | 2.01                     | 0.43              |
| 4:D:399:PHE:CE1    | 4:D:405:LEU:HD21   | 2.53                     | 0.43              |
| 6:F:221:LEU:O      | 6:F:261:GLU:HA     | 2.19                     | 0.43              |

Continued on next page...

Continued from previous page...

| Atom-1             | Atom-2             | Interatomic distance (Å) | Clash overlap (Å) |
|--------------------|--------------------|--------------------------|-------------------|
| 1:A:188:ILE:HG13   | 1:A:425:MET:HG3    | 2.01                     | 0.43              |
| 6:F:71:LEU:HD22    | 6:F:298:ILE:CD1    | 2.49                     | 0.43              |
| 2:B:163:ASP:O      | 2:B:253[A]:ARG:NH2 | 2.52                     | 0.43              |
| 4:D:83:PHE:O       | 4:D:86:ILE:CG2     | 2.61                     | 0.43              |
| 1:A:293:ASN:ND2    | 1:A:339:ARG:HH12   | 2.17                     | 0.43              |
| 6:F:8:ASP:HB2      | 6:F:43:GLU:HA      | 2.01                     | 0.43              |
| 1:A:26:LEU:HB3     | 1:A:361:THR:HG21   | 2.01                     | 0.42              |
| 1:A:176[A]:GLN:C   | 1:A:177:VAL:HG22   | 2.39                     | 0.42              |
| 1:A:241:SER:HB2    | 1:A:249:ASN:O      | 2.19                     | 0.42              |
| 4:D:291:LEU:HD11   | 4:D:373:MET:HB3    | 2.01                     | 0.42              |
| 1:A:339:ARG:HB3    | 1:A:341:ILE:HD11   | 1.98                     | 0.42              |
| 1:A:176[A]:GLN:HG2 | 6:F:56:PRO:HB3     | 2.00                     | 0.42              |
| 1:A:285:GLN:HA     | 1:A:285:GLN:OE1    | 2.19                     | 0.42              |
| 6:F:14:TYR:CD1     | 6:F:17:VAL:HG11    | 2.52                     | 0.42              |
| 2:B:75:MET:SD      | 2:B:92:PHE:HD2     | 2.41                     | 0.42              |
| 2:B:103:TRP:HB2    | 2:B:186:ASN:OD1    | 2.19                     | 0.42              |
| 4:D:272:PHE:O      | 4:D:300:ASN:ND2    | 2.44                     | 0.42              |
| 6:F:81:ILE:HD12    | 6:F:94:PHE:CD2     | 2.54                     | 0.42              |
| 6:F:314:LEU:HD22   | 6:F:350:ILE:HD11   | 2.01                     | 0.42              |
| 2:B:3:GLU:OE1      | 2:B:130:ASP:N      | 2.52                     | 0.42              |
| 1:A:187:SER:HB3    | 1:A:391:LEU:HD21   | 2.00                     | 0.42              |
| 3:C:217:LEU:O      | 3:C:218:ASP:HB2    | 2.19                     | 0.42              |
| 4:D:360:PRO:C      | 4:D:369:ARG:N      | 2.73                     | 0.42              |
| 6:F:299:GLU:N      | 6:F:300:PRO:HD2    | 2.35                     | 0.42              |
| 1:A:176[B]:GLN:O   | 1:A:177:VAL:HG13   | 2.20                     | 0.42              |
| 1:A:179:THR:O      | 2:B:352:LYS:NZ     | 2.52                     | 0.42              |
| 1:A:245:ASP:OD2    | 5:E:15:THR:OG1     | 2.37                     | 0.42              |
| 2:B:358:ILE:N      | 2:B:358:ILE:HD12   | 2.35                     | 0.42              |
| 2:B:405:LEU:HD12   | 2:B:405:LEU:HA     | 1.80                     | 0.42              |
| 3:C:68:VAL:HG21    | 3:C:118:VAL:HG21   | 2.02                     | 0.42              |
| 6:F:305:LYS:O      | 6:F:306:HIS:HB2    | 2.19                     | 0.42              |
| 3:C:27:GLU:HG2     | 3:C:361:THR:HG21   | 2.02                     | 0.42              |
| 13:X:508:EPA:C25   | 13:X:508:EPA:C13   | 2.98                     | 0.42              |
| 2:B:7:ILE:O        | 2:B:137:LEU:HA     | 2.19                     | 0.42              |
| 2:B:402:LYS:HG3    | 2:B:405:LEU:CD2    | 2.49                     | 0.42              |
| 6:F:208:ASP:HB2    | 17:S:160:HOH:O     | 2.19                     | 0.42              |
| 6:F:345:GLU:O      | 6:F:349:GLY:N      | 2.47                     | 0.42              |
| 3:C:119:LEU:HD11   | 3:C:156:ARG:HB3    | 2.02                     | 0.41              |
| 3:C:156:ARG:HD2    | 3:C:156:ARG:HA     | 1.83                     | 0.41              |
| 1:A:36:MET:CG      | 1:A:36:MET:O       | 2.68                     | 0.41              |
| 3:C:250:VAL:CG2    | 3:C:255:PHE:CZ     | 3.03                     | 0.41              |

Continued on next page...

Continued from previous page...

| Atom-1           | Atom-2             | Interatomic distance (Å) | Clash overlap (Å) |
|------------------|--------------------|--------------------------|-------------------|
| 1:A:141:PHE:O    | 1:A:147:SER:HB3    | 2.20                     | 0.41              |
| 2:B:147:SER:OG   | 2:B:190:SER:OG     | 2.24                     | 0.41              |
| 6:F:15:ALA:O     | 6:F:19:ARG:NE      | 2.53                     | 0.41              |
| 1:A:278:ALA:HA   | 1:A:369:ALA:HB2    | 2.03                     | 0.41              |
| 2:B:392:SER:HB2  | 2:B:425:MET:HE2    | 2.03                     | 0.41              |
| 3:C:255:PHE:CE2  | 3:C:318:LEU:HD11   | 2.55                     | 0.41              |
| 4:D:197:ASN:OD1  | 5:E:122:ARG:NH2    | 2.52                     | 0.41              |
| 5:E:106:GLU:HA   | 5:E:106:GLU:OE1    | 2.20                     | 0.41              |
| 6:F:284:LEU:HA   | 6:F:284:LEU:HD23   | 1.80                     | 0.41              |
| 1:A:21:TRP:CE3   | 1:A:63:PRO:HB3     | 2.55                     | 0.41              |
| 1:A:69:ASP:O     | 1:A:94:THR:HA      | 2.20                     | 0.41              |
| 3:C:99:ALA:HB3   | 3:C:144:GLY:HA3    | 2.03                     | 0.41              |
| 6:F:80:LEU:O     | 6:F:84:SER:OG      | 2.22                     | 0.41              |
| 1:A:2:ARG:HG3    | 1:A:2:ARG:HH11     | 1.85                     | 0.41              |
| 1:A:139:HIS:CD2  | 1:A:150:THR:HG21   | 2.56                     | 0.41              |
| 2:B:2:ARG:HH21   | 2:B:130:ASP:HB2    | 1.85                     | 0.41              |
| 4:D:414:ASP:OD1  | 4:D:416:MET:HG2    | 2.21                     | 0.41              |
| 1:A:7:ILE:HG21   | 1:A:153:LEU:HD21   | 2.03                     | 0.41              |
| 1:A:88:HIS:N     | 1:A:91:GLN:OE1     | 2.37                     | 0.41              |
| 1:A:179:THR:HG23 | 2:B:352:LYS:HZ2    | 1.86                     | 0.41              |
| 1:A:283:HIS:NE2  | 1:A:369:ALA:HB1    | 2.36                     | 0.41              |
| 3:C:168:GLU:OE2  | 3:C:194:THR:HG21   | 2.21                     | 0.41              |
| 3:C:209:ILE:CD1  | 3:C:302:MET:SD     | 3.07                     | 0.41              |
| 4:D:39:ASP:OD1   | 4:D:39:ASP:N       | 2.53                     | 0.41              |
| 4:D:112:ALA:O    | 4:D:115:VAL:HG12   | 2.20                     | 0.41              |
| 4:D:295:MET:SD   | 4:D:375:ALA:HB1    | 2.61                     | 0.41              |
| 1:A:36:MET:CG    | 1:A:39:ASP:HB2     | 2.51                     | 0.41              |
| 3:C:225:THR:O    | 3:C:229[A]:ARG:HG3 | 2.21                     | 0.41              |
| 4:D:161:TYR:HB3  | 4:D:164:ARG:HG3    | 2.02                     | 0.41              |
| 6:F:77:LEU:O     | 6:F:81:ILE:HG13    | 2.21                     | 0.41              |
| 6:F:178:GLN:OE1  | 6:F:178:GLN:CA     | 2.68                     | 0.41              |
| 4:D:349:ASN:O    | 4:D:352:LYS:HE2    | 2.21                     | 0.40              |
| 5:E:138:GLU:HA   | 5:E:141:GLU:HB2    | 2.02                     | 0.40              |
| 6:F:40:MET:HE3   | 6:F:52:LEU:HD11    | 2.03                     | 0.40              |
| 6:F:173:ILE:CD1  | 6:F:180:HIS:HB2    | 2.52                     | 0.40              |
| 6:F:207:VAL:O    | 6:F:312:PHE:HB2    | 2.22                     | 0.40              |
| 6:F:226:GLU:HG3  | 6:F:237:THR:HG22   | 2.01                     | 0.40              |
| 3:C:55:GLU:HA    | 3:C:60:LYS:O       | 2.21                     | 0.40              |
| 5:E:47:LEU:HD23  | 5:E:47:LEU:O       | 2.22                     | 0.40              |
| 2:B:179:ASP:CB   | 3:C:352:LYS:HG3    | 2.49                     | 0.40              |
| 3:C:392:ASP:OD2  | 3:C:429:GLU:OE2    | 2.39                     | 0.40              |

Continued on next page...

Continued from previous page...

| Atom-1           | Atom-2           | Interatomic distance (Å) | Clash overlap (Å) |
|------------------|------------------|--------------------------|-------------------|
| 4:D:63:PRO:CD    | 4:D:86:ILE:HG12  | 2.51                     | 0.40              |
| 6:F:226:GLU:CG   | 6:F:237:THR:HG22 | 2.51                     | 0.40              |
| 1:A:391:LEU:HD12 | 1:A:391:LEU:HA   | 1.86                     | 0.40              |
| 4:D:20:PHE:CD1   | 4:D:235:MET:HE2  | 2.57                     | 0.40              |
| 4:D:60:LYS:HD2   | 4:D:60:LYS:HA    | 1.78                     | 0.40              |
| 4:D:210:TYR:CD1  | 4:D:222:PRO:HG2  | 2.57                     | 0.40              |
| 4:D:345:GLU:CD   | 4:D:345:GLU:H    | 2.25                     | 0.40              |
| 5:E:53:LYS:HE2   | 5:E:53:LYS:HB3   | 1.95                     | 0.40              |

All (1) symmetry-related close contacts are listed below. The label for Atom-2 includes the symmetry operator and encoded unit-cell translations to be applied.

| Atom-1          | Atom-2                 | Interatomic distance (Å) | Clash overlap (Å) |
|-----------------|------------------------|--------------------------|-------------------|
| 2:B:113:GLU:OE2 | 3:C:283:HIS:NE2[4_555] | 1.62                     | 0.58              |

## 5.3 Torsion angles [i](#)

### 5.3.1 Protein backbone [i](#)

In the following table, the Percentiles column shows the percent Ramachandran outliers of the chain as a percentile score with respect to all X-ray entries followed by that with respect to entries of similar resolution.

The Analysed column shows the number of residues for which the backbone conformation was analysed, and the total number of residues.

| Mol | Chain | Analysed        | Favoured   | Allowed | Outliers | Percentiles |     |
|-----|-------|-----------------|------------|---------|----------|-------------|-----|
| 1   | A     | 436/439 (99%)   | 420 (96%)  | 16 (4%) | 0        | 100         | 100 |
| 2   | B     | 428/429 (100%)  | 413 (96%)  | 15 (4%) | 0        | 100         | 100 |
| 3   | C     | 442/440 (100%)  | 426 (96%)  | 16 (4%) | 0        | 100         | 100 |
| 4   | D     | 427/430 (99%)   | 414 (97%)  | 13 (3%) | 0        | 100         | 100 |
| 5   | E     | 120/123 (98%)   | 119 (99%)  | 1 (1%)  | 0        | 100         | 100 |
| 6   | F     | 321/332 (97%)   | 304 (95%)  | 17 (5%) | 0        | 100         | 100 |
| All | All   | 2174/2193 (99%) | 2096 (96%) | 78 (4%) | 0        | 100         | 100 |

There are no Ramachandran outliers to report.

### 5.3.2 Protein sidechains [i](#)

In the following table, the Percentiles column shows the percent sidechain outliers of the chain as a percentile score with respect to all X-ray entries followed by that with respect to entries of similar resolution.

The Analysed column shows the number of residues for which the sidechain conformation was analysed, and the total number of residues.

| Mol | Chain | Analysed         | Rotameric  | Outliers | Percentiles |    |
|-----|-------|------------------|------------|----------|-------------|----|
| 1   | A     | 371/370 (100%)   | 360 (97%)  | 11 (3%)  | 41          | 68 |
| 2   | B     | 371/370 (100%)   | 366 (99%)  | 5 (1%)   | 69          | 87 |
| 3   | C     | 375/371 (101%)   | 370 (99%)  | 5 (1%)   | 69          | 87 |
| 4   | D     | 369/371 (100%)   | 355 (96%)  | 14 (4%)  | 33          | 58 |
| 5   | E     | 111/110 (101%)   | 110 (99%)  | 1 (1%)   | 78          | 92 |
| 6   | F     | 298/297 (100%)   | 286 (96%)  | 12 (4%)  | 31          | 56 |
| All | All   | 1895/1889 (100%) | 1847 (98%) | 48 (2%)  | 47          | 73 |

All (48) residues with a non-rotameric sidechain are listed below:

| Mol | Chain | Res | Type |
|-----|-------|-----|------|
| 1   | A     | 46  | ASP  |
| 1   | A     | 96  | LYS  |
| 1   | A     | 178 | SER  |
| 1   | A     | 193 | THR  |
| 1   | A     | 256 | GLN  |
| 1   | A     | 280 | LYS  |
| 1   | A     | 329 | ASN  |
| 1   | A     | 339 | ARG  |
| 1   | A     | 346 | TRP  |
| 1   | A     | 381 | THR  |
| 1   | A     | 437 | VAL  |
| 2   | B     | 48  | ARG  |
| 2   | B     | 139 | HIS  |
| 2   | B     | 402 | LYS  |
| 2   | B     | 414 | ASP  |
| 2   | B     | 430 | SER  |
| 3   | C     | 46  | ASP  |
| 3   | C     | 120 | ASP  |
| 3   | C     | 283 | HIS  |
| 3   | C     | 339 | ARG  |
| 3   | C     | 430 | LYS  |
| 4   | D     | 15  | GLN  |

*Continued on next page...*

Continued from previous page...

| Mol | Chain | Res | Type |
|-----|-------|-----|------|
| 4   | D     | 85  | GLN  |
| 4   | D     | 133 | GLN  |
| 4   | D     | 155 | SER  |
| 4   | D     | 207 | GLU  |
| 4   | D     | 282 | GLN  |
| 4   | D     | 284 | ARG  |
| 4   | D     | 286 | LEU  |
| 4   | D     | 302 | MET  |
| 4   | D     | 308 | ARG  |
| 4   | D     | 322 | ARG  |
| 4   | D     | 405 | LEU  |
| 4   | D     | 422 | GLU  |
| 4   | D     | 426 | ASN  |
| 5   | E     | 6   | MET  |
| 6   | F     | 32  | LYS  |
| 6   | F     | 46  | ARG  |
| 6   | F     | 143 | GLU  |
| 6   | F     | 164 | SER  |
| 6   | F     | 197 | ARG  |
| 6   | F     | 217 | ARG  |
| 6   | F     | 224 | SER  |
| 6   | F     | 262 | MET  |
| 6   | F     | 353 | VAL  |
| 6   | F     | 356 | SER  |
| 6   | F     | 357 | SER  |
| 6   | F     | 361 | LEU  |

Sometimes sidechains can be flipped to improve hydrogen bonding and reduce clashes. All (6) such sidechains are listed below:

| Mol | Chain | Res | Type |
|-----|-------|-----|------|
| 1   | A     | 128 | GLN  |
| 1   | A     | 285 | GLN  |
| 1   | A     | 372 | GLN  |
| 3   | C     | 293 | ASN  |
| 4   | D     | 139 | HIS  |
| 6   | F     | 260 | ASN  |

### 5.3.3 RNA [i](#)

There are no RNA molecules in this entry.

## 5.4 Non-standard residues in protein, DNA, RNA chains [i](#)

There are no non-standard protein/DNA/RNA residues in this entry.

## 5.5 Carbohydrates [i](#)

There are no monosaccharides in this entry.

## 5.6 Ligand geometry [i](#)

Of 17 ligands modelled in this entry, 6 are monoatomic and 5 could not be matched to an existing wwPDB Chemical Component Dictionary definition at this stage - leaving 6 for Mogul analysis.

In the following table, the Counts columns list the number of bonds (or angles) for which Mogul statistics could be retrieved, the number of bonds (or angles) that are observed in the model and the number of bonds (or angles) that are defined in the Chemical Component Dictionary. The Link column lists molecule types, if any, to which the group is linked. The Z score for a bond length (or angle) is the number of standard deviations the observed value is removed from the expected value. A bond length (or angle) with  $|Z| > 2$  is considered an outlier worth inspection. RMSZ is the root-mean-square of all Z scores of the bond lengths (or angles).

| Mol | Type | Chain | Res | Link | Bond lengths |      |          | Bond angles |      |          |
|-----|------|-------|-----|------|--------------|------|----------|-------------|------|----------|
|     |      |       |     |      | Counts       | RMSZ | # Z  > 2 | Counts      | RMSZ | # Z  > 2 |
| 11  | ACP  | X     | 506 | -    | 27,33,33     | 0.89 | 1 (3%)   | 32,52,52    | 0.80 | 2 (6%)   |
| 14  | VLB  | X     | 509 | -    | 63,67,67     | 1.76 | 16 (25%) | 79,108,108  | 2.38 | 26 (32%) |
| 7   | GTP  | X     | 511 | 8    | 26,34,34     | 1.02 | 3 (11%)  | 32,54,54    | 0.69 | 1 (3%)   |
| 10  | GDP  | X     | 504 | 8    | 24,30,30     | 1.02 | 3 (12%)  | 30,47,47    | 0.67 | 1 (3%)   |
| 7   | GTP  | X     | 501 | 8    | 26,34,34     | 0.99 | 2 (7%)   | 32,54,54    | 0.69 | 1 (3%)   |
| 10  | GDP  | X     | 514 | 8    | 24,30,30     | 0.99 | 2 (8%)   | 30,47,47    | 0.66 | 1 (3%)   |

In the following table, the Chirals column lists the number of chiral outliers, the number of chiral centers analysed, the number of these observed in the model and the number defined in the Chemical Component Dictionary. Similar counts are reported in the Torsion and Rings columns. '-' means no outliers of that kind were identified.

| Mol | Type | Chain | Res | Link | Chirals | Torsions      | Rings   |
|-----|------|-------|-----|------|---------|---------------|---------|
| 11  | ACP  | X     | 506 | -    | -       | 0/15/38/38    | 0/3/3/3 |
| 14  | VLB  | X     | 509 | -    | -       | 15/38/131/131 | 0/7/9/9 |
| 7   | GTP  | X     | 511 | 8    | -       | 6/18/38/38    | 0/3/3/3 |
| 10  | GDP  | X     | 504 | 8    | -       | 4/12/32/32    | 0/3/3/3 |
| 7   | GTP  | X     | 501 | 8    | -       | 8/18/38/38    | 0/3/3/3 |

Continued on next page...

Continued from previous page...

| Mol | Type | Chain | Res | Link | Chirals | Torsions   | Rings   |
|-----|------|-------|-----|------|---------|------------|---------|
| 10  | GDP  | X     | 514 | 8    | -       | 4/12/32/32 | 0/3/3/3 |

All (27) bond length outliers are listed below:

| Mol | Chain | Res | Type | Atoms   | Z     | Observed(Å) | Ideal(Å) |
|-----|-------|-----|------|---------|-------|-------------|----------|
| 14  | X     | 509 | VLB  | C57-N56 | 5.12  | 1.59        | 1.47     |
| 14  | X     | 509 | VLB  | C68-C73 | -3.87 | 1.50        | 1.53     |
| 14  | X     | 509 | VLB  | C58-C59 | -3.84 | 1.45        | 1.52     |
| 14  | X     | 509 | VLB  | C19-N9  | 3.18  | 1.52        | 1.47     |
| 14  | X     | 509 | VLB  | O75-C76 | -3.02 | 1.38        | 1.45     |
| 14  | X     | 509 | VLB  | C5-C6   | -2.82 | 1.45        | 1.51     |
| 14  | X     | 509 | VLB  | O27-C3  | -2.75 | 1.37        | 1.42     |
| 10  | X     | 504 | GDP  | C5-C6   | -2.73 | 1.41        | 1.47     |
| 7   | X     | 511 | GTP  | C5-C6   | -2.69 | 1.41        | 1.47     |
| 7   | X     | 501 | GTP  | C5-C6   | -2.68 | 1.42        | 1.47     |
| 10  | X     | 514 | GDP  | C5-C6   | -2.66 | 1.42        | 1.47     |
| 14  | X     | 509 | VLB  | C70-C54 | 2.53  | 1.57        | 1.53     |
| 14  | X     | 509 | VLB  | O25-C26 | -2.50 | 1.39        | 1.45     |
| 14  | X     | 509 | VLB  | O32-C16 | 2.49  | 1.41        | 1.37     |
| 14  | X     | 509 | VLB  | C57-C58 | -2.42 | 1.45        | 1.52     |
| 11  | X     | 506 | ACP  | PB-O2B  | -2.42 | 1.50        | 1.56     |
| 14  | X     | 509 | VLB  | C68-C67 | -2.31 | 1.51        | 1.53     |
| 14  | X     | 509 | VLB  | O32-C33 | -2.23 | 1.36        | 1.42     |
| 14  | X     | 509 | VLB  | C69-C52 | 2.19  | 1.55        | 1.52     |
| 14  | X     | 509 | VLB  | C5-C19  | -2.16 | 1.48        | 1.53     |
| 7   | X     | 511 | GTP  | C8-N7   | -2.16 | 1.31        | 1.35     |
| 10  | X     | 504 | GDP  | C8-N7   | -2.15 | 1.31        | 1.35     |
| 10  | X     | 514 | GDP  | C8-N7   | -2.13 | 1.31        | 1.35     |
| 14  | X     | 509 | VLB  | C59-C67 | -2.11 | 1.36        | 1.39     |
| 7   | X     | 501 | GTP  | C8-N7   | -2.09 | 1.31        | 1.35     |
| 7   | X     | 511 | GTP  | C5-C4   | -2.02 | 1.37        | 1.43     |
| 10  | X     | 504 | GDP  | C5-C4   | -2.02 | 1.37        | 1.43     |

All (32) bond angle outliers are listed below:

| Mol | Chain | Res | Type | Atoms       | Z     | Observed(°) | Ideal(°) |
|-----|-------|-----|------|-------------|-------|-------------|----------|
| 14  | X     | 509 | VLB  | O25-C23-C3  | 6.46  | 123.08      | 112.22   |
| 14  | X     | 509 | VLB  | C52-C69-N56 | 6.24  | 121.05      | 111.28   |
| 14  | X     | 509 | VLB  | C57-C58-C59 | 5.63  | 124.94      | 114.30   |
| 14  | X     | 509 | VLB  | C58-C57-N56 | 5.43  | 125.56      | 113.44   |
| 14  | X     | 509 | VLB  | O72-C54-C70 | -4.87 | 100.35      | 108.75   |
| 14  | X     | 509 | VLB  | O75-C73-C68 | 4.34  | 117.84      | 111.32   |

Continued on next page...

Continued from previous page...

| Mol | Chain | Res | Type | Atoms       | Z     | Observed(°) | Ideal(°) |
|-----|-------|-----|------|-------------|-------|-------------|----------|
| 14  | X     | 509 | VLB  | C19-C5-C6   | 4.30  | 112.68      | 108.28   |
| 14  | X     | 509 | VLB  | O75-C73-O74 | -4.27 | 116.44      | 123.93   |
| 14  | X     | 509 | VLB  | C13-C18-N1  | 3.85  | 115.35      | 110.98   |
| 14  | X     | 509 | VLB  | C63-C64-C65 | -3.85 | 114.55      | 120.08   |
| 14  | X     | 509 | VLB  | C22-N1-C18  | -3.67 | 109.10      | 120.84   |
| 14  | X     | 509 | VLB  | O25-C23-O24 | -3.62 | 117.59      | 123.93   |
| 14  | X     | 509 | VLB  | O32-C16-C15 | 3.55  | 120.21      | 116.58   |
| 14  | X     | 509 | VLB  | C22-N1-C2   | -3.38 | 110.96      | 119.21   |
| 14  | X     | 509 | VLB  | C17-C18-N1  | -3.27 | 123.05      | 127.61   |
| 14  | X     | 509 | VLB  | O32-C16-C17 | -3.21 | 118.59      | 124.12   |
| 14  | X     | 509 | VLB  | C62-C61-C60 | -3.00 | 116.73      | 120.89   |
| 14  | X     | 509 | VLB  | O24-C23-C3  | -2.99 | 119.29      | 123.94   |
| 14  | X     | 509 | VLB  | C3-C2-N1    | -2.92 | 108.79      | 112.81   |
| 14  | X     | 509 | VLB  | C18-N1-C2   | -2.75 | 105.33      | 109.03   |
| 14  | X     | 509 | VLB  | C53-C52-C69 | 2.73  | 111.91      | 108.72   |
| 14  | X     | 509 | VLB  | O28-C29-C30 | 2.34  | 115.39      | 111.09   |
| 14  | X     | 509 | VLB  | C61-C60-C65 | 2.33  | 121.25      | 118.17   |
| 11  | X     | 506 | ACP  | C5-C6-N6    | 2.28  | 123.82      | 120.35   |
| 11  | X     | 506 | ACP  | O1G-PG-C3B  | -2.18 | 106.53      | 111.24   |
| 14  | X     | 509 | VLB  | C33-O32-C16 | -2.08 | 114.38      | 117.53   |
| 14  | X     | 509 | VLB  | C2-C12-C19  | 2.08  | 117.58      | 114.07   |
| 14  | X     | 509 | VLB  | C21-C20-C5  | -2.06 | 111.82      | 115.79   |
| 10  | X     | 504 | GDP  | O6-C6-C5    | 2.03  | 128.34      | 124.37   |
| 7   | X     | 511 | GTP  | O6-C6-C5    | 2.03  | 128.33      | 124.37   |
| 10  | X     | 514 | GDP  | O6-C6-C5    | 2.03  | 128.33      | 124.37   |
| 7   | X     | 501 | GTP  | O6-C6-C5    | 2.00  | 128.29      | 124.37   |

There are no chirality outliers.

All (37) torsion outliers are listed below:

| Mol | Chain | Res | Type | Atoms           |
|-----|-------|-----|------|-----------------|
| 7   | X     | 501 | GTP  | PB-O3B-PG-O2G   |
| 7   | X     | 501 | GTP  | PB-O3B-PG-O3G   |
| 7   | X     | 501 | GTP  | C5'-O5'-PA-O1A  |
| 7   | X     | 511 | GTP  | PB-O3B-PG-O3G   |
| 7   | X     | 511 | GTP  | C5'-O5'-PA-O1A  |
| 7   | X     | 511 | GTP  | C5'-O5'-PA-O2A  |
| 10  | X     | 504 | GDP  | C5'-O5'-PA-O1A  |
| 10  | X     | 514 | GDP  | C5'-O5'-PA-O1A  |
| 14  | X     | 509 | VLB  | O72-C54-C70-C71 |
| 14  | X     | 509 | VLB  | C55-C54-C70-C71 |
| 14  | X     | 509 | VLB  | C53-C54-C70-C71 |

Continued on next page...

Continued from previous page...

| Mol | Chain | Res | Type | Atoms           |
|-----|-------|-----|------|-----------------|
| 14  | X     | 509 | VLB  | C58-C57-N56-C69 |
| 14  | X     | 509 | VLB  | C51-C68-C73-O75 |
| 14  | X     | 509 | VLB  | C15-C68-C73-O74 |
| 14  | X     | 509 | VLB  | C15-C68-C73-O75 |
| 14  | X     | 509 | VLB  | C68-C73-O75-C76 |
| 14  | X     | 509 | VLB  | O74-C73-O75-C76 |
| 14  | X     | 509 | VLB  | C3-C23-O25-C26  |
| 14  | X     | 509 | VLB  | O24-C23-O25-C26 |
| 10  | X     | 514 | GDP  | C5'-O5'-PA-O3A  |
| 7   | X     | 501 | GTP  | C5'-O5'-PA-O2A  |
| 10  | X     | 504 | GDP  | C5'-O5'-PA-O2A  |
| 10  | X     | 514 | GDP  | C5'-O5'-PA-O2A  |
| 10  | X     | 514 | GDP  | PB-O3A-PA-O2A   |
| 14  | X     | 509 | VLB  | O25-C23-C3-C4   |
| 14  | X     | 509 | VLB  | C67-C68-C73-O75 |
| 7   | X     | 501 | GTP  | PB-O3A-PA-O2A   |
| 14  | X     | 509 | VLB  | C67-C68-C73-O74 |
| 7   | X     | 501 | GTP  | C5'-O5'-PA-O3A  |
| 7   | X     | 511 | GTP  | C5'-O5'-PA-O3A  |
| 10  | X     | 504 | GDP  | C5'-O5'-PA-O3A  |
| 7   | X     | 501 | GTP  | PB-O3A-PA-O1A   |
| 7   | X     | 511 | GTP  | PB-O3A-PA-O1A   |
| 7   | X     | 511 | GTP  | PB-O3A-PA-O2A   |
| 10  | X     | 504 | GDP  | PB-O3A-PA-O2A   |
| 7   | X     | 501 | GTP  | PB-O3B-PG-O1G   |
| 14  | X     | 509 | VLB  | C58-C57-N56-C55 |

There are no ring outliers.

1 monomer is involved in 5 short contacts:

| Mol | Chain | Res | Type | Clashes | Symm-Clashes |
|-----|-------|-----|------|---------|--------------|
| 14  | X     | 509 | VLB  | 5       | 0            |

The following is a two-dimensional graphical depiction of Mogul quality analysis of bond lengths, bond angles, torsion angles, and ring geometry for all instances of the Ligand of Interest. In addition, ligands with molecular weight > 250 and outliers as shown on the validation Tables will also be included. For torsion angles, if less than 5% of the Mogul distribution of torsion angles is within 10 degrees of the torsion angle in question, then that torsion angle is considered an outlier. Any bond that is central to one or more torsion angles identified as an outlier by Mogul will be highlighted in the graph. For rings, the root-mean-square deviation (RMSD) between the ring in question and similar rings identified by Mogul is calculated over all ring torsion angles. If the average RMSD is greater than 60 degrees and the minimal RMSD between the ring in question and

any Mogul-identified rings is also greater than 60 degrees, then that ring is considered an outlier. The outliers are highlighted in purple. The color gray indicates Mogul did not find sufficient equivalents in the CSD to analyse the geometry.

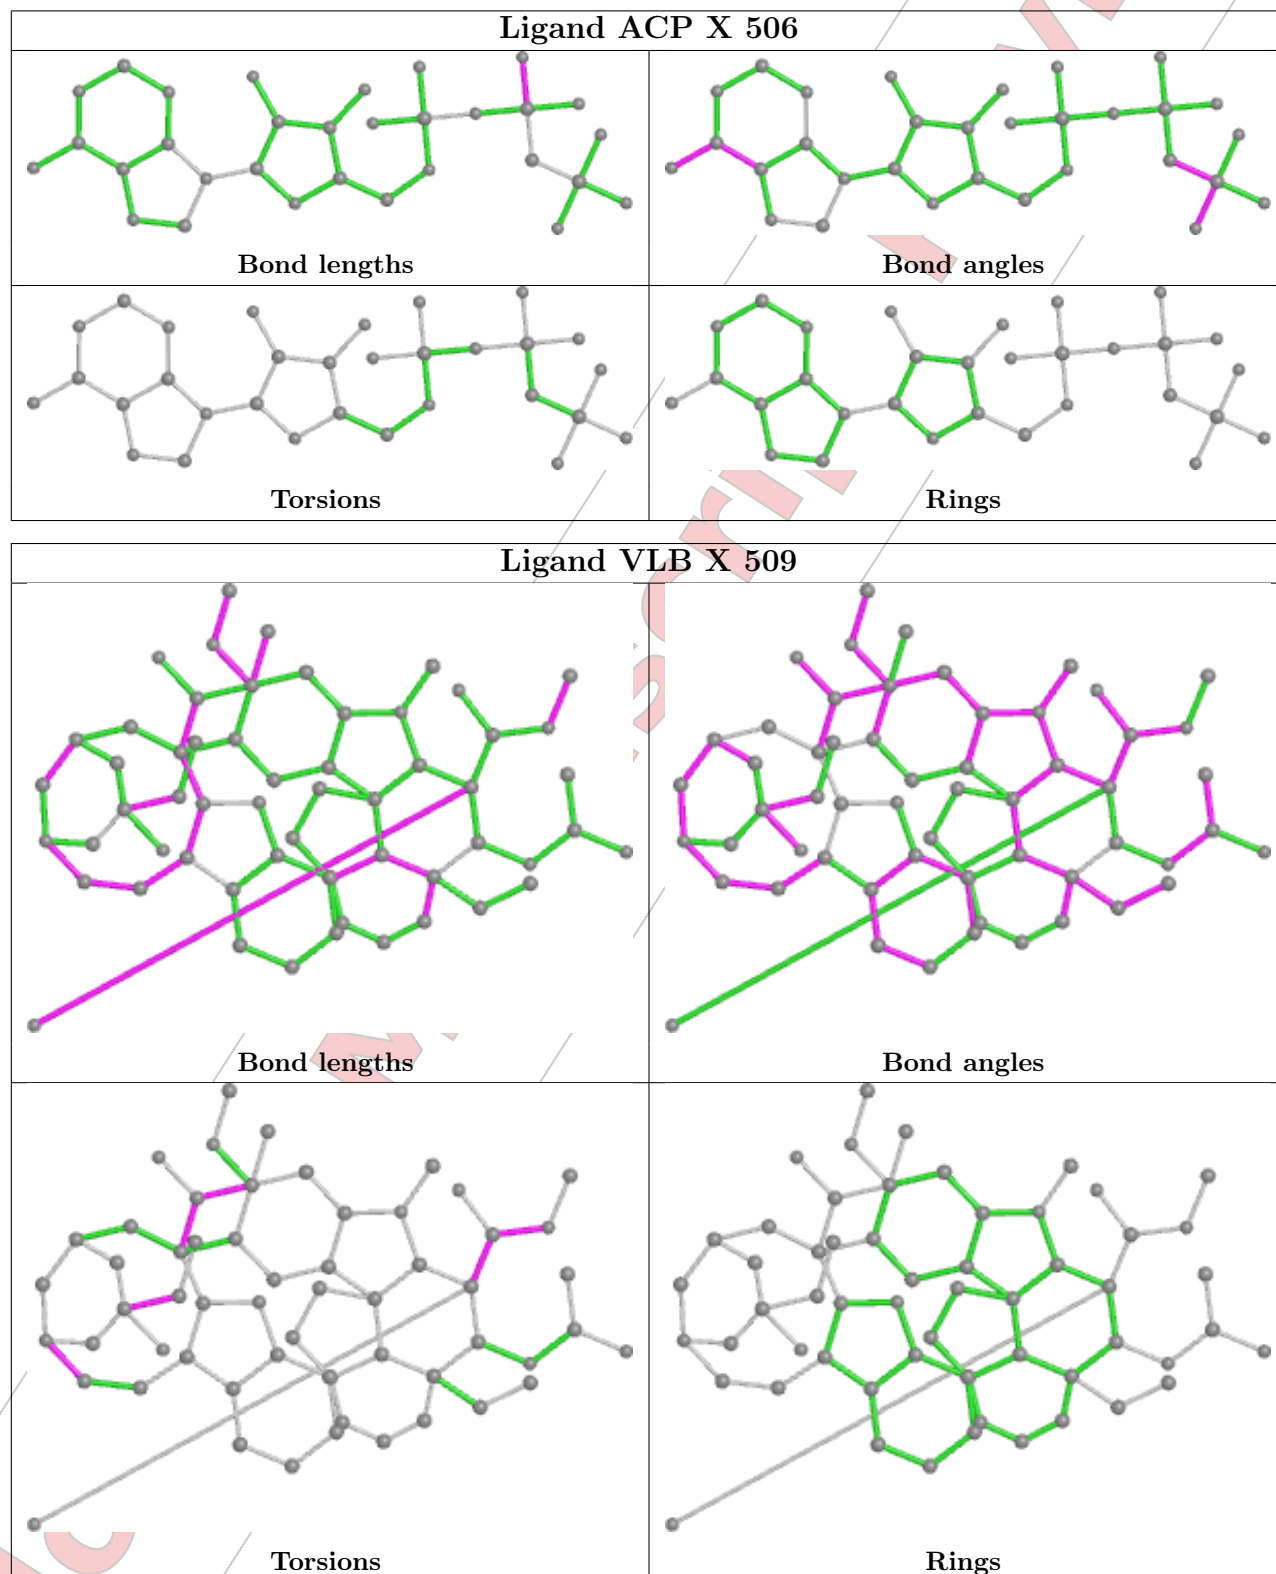

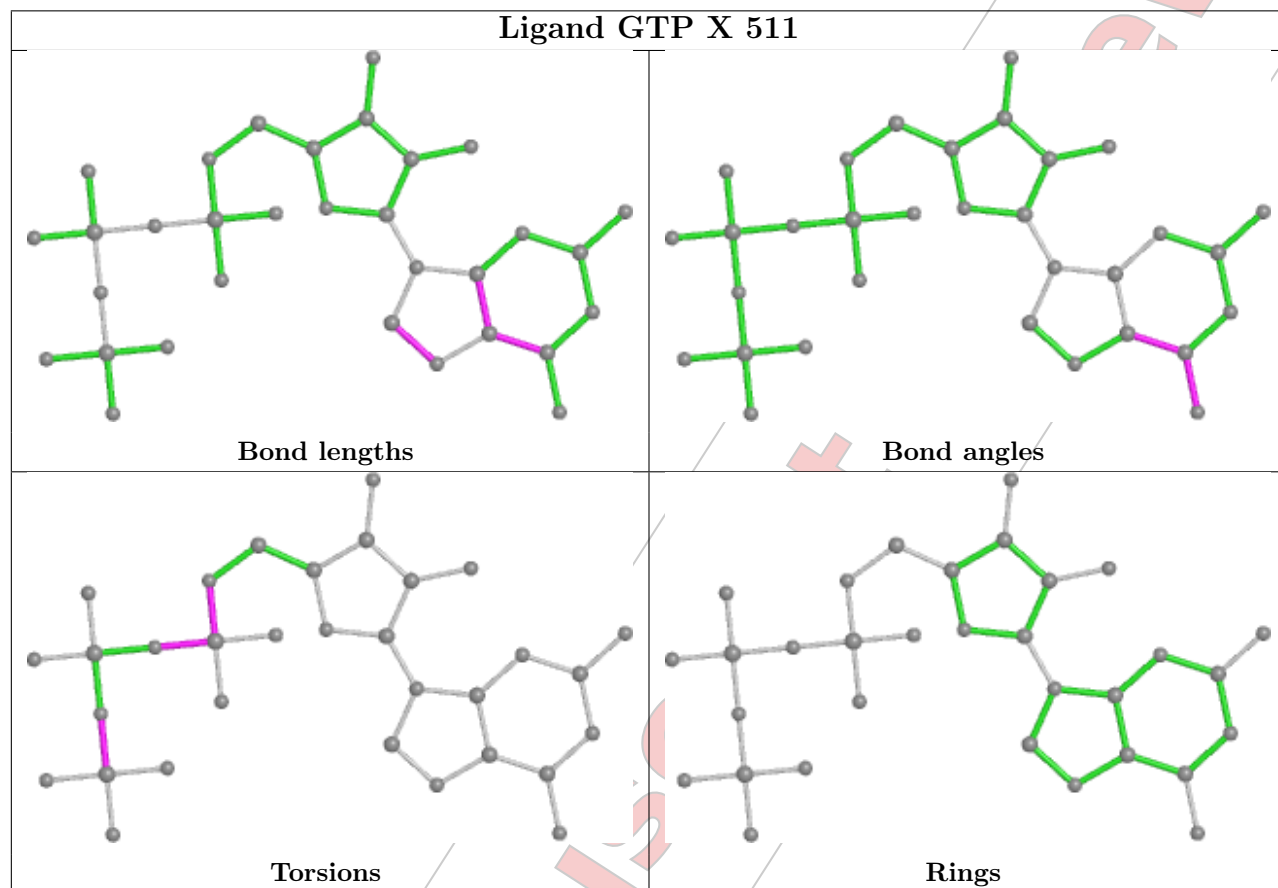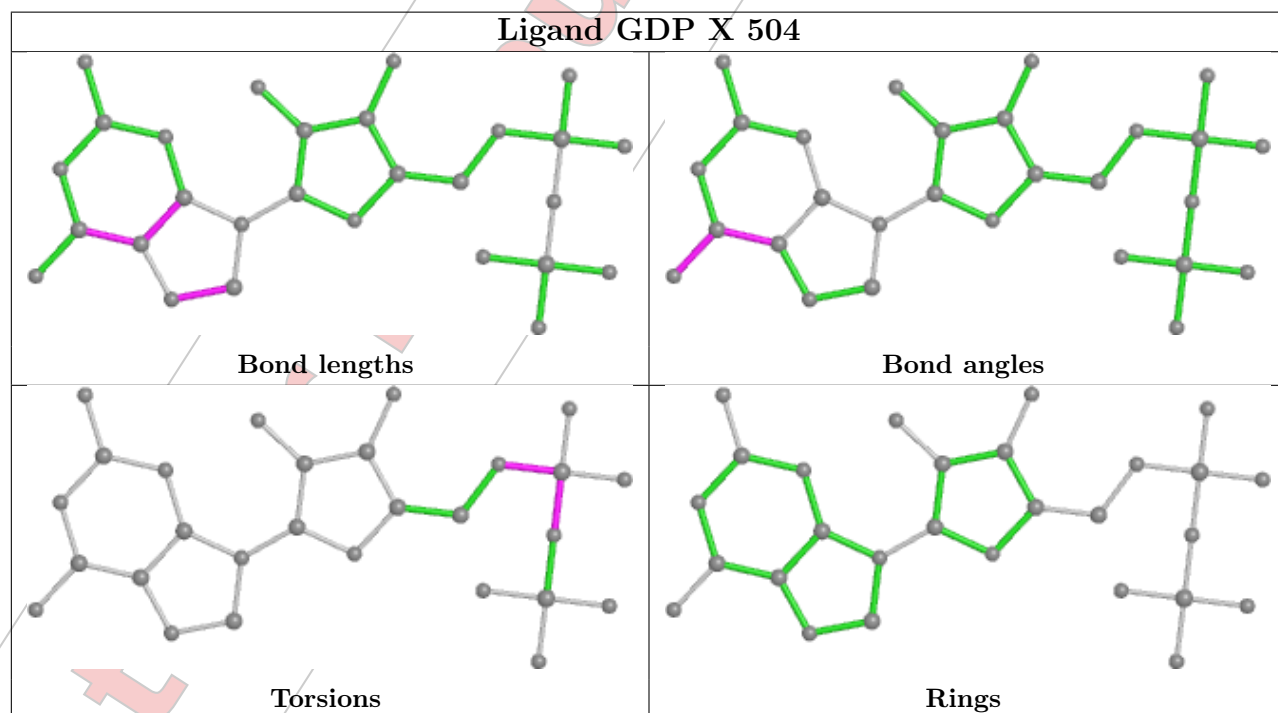

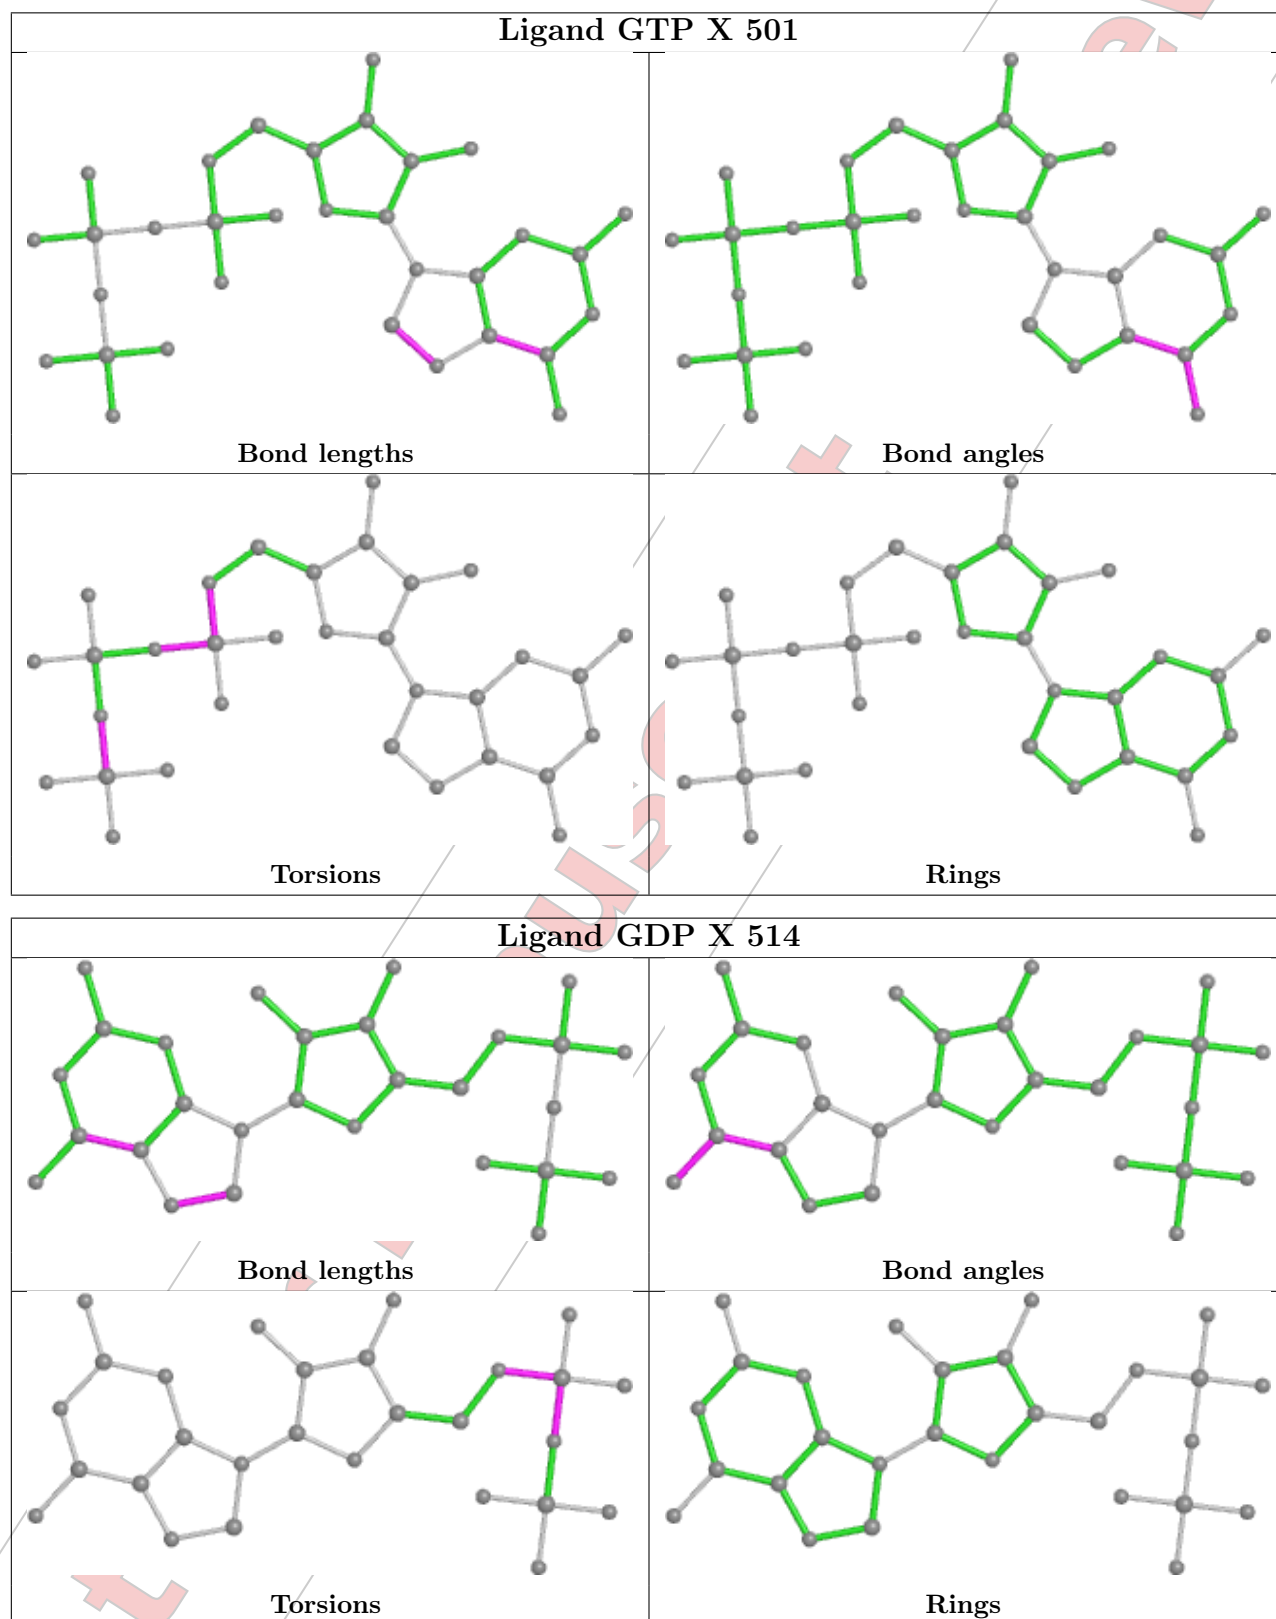

## 5.7 Other polymers [\(i\)](#)

There are no such residues in this entry.

## 5.8 Polymer linkage issues [i](#)

The following chains have linkage breaks:

| Mol | Chain | Number of breaks |
|-----|-------|------------------|
| 6   | F     | 5                |
| 1   | A     | 2                |
| 5   | E     | 1                |
| 4   | D     | 1                |
| 2   | B     | 1                |

All chain breaks are listed below:

| Model | Chain | Residue-1  | Atom-1 | Residue-2 | Atom-2 | Distance (Å) |
|-------|-------|------------|--------|-----------|--------|--------------|
| 1     | E     | 28:SER     | C      | 44:ASP    | N      | 31.73        |
| 1     | F     | 362:ALA    | C      | 372:THR   | N      | 16.08        |
| 1     | F     | 155:ALA    | C      | 162:ILE   | N      | 13.76        |
| 1     | F     | 246:GLN    | C      | 256:TYR   | N      | 12.22        |
| 1     | F     | 102:PRO    | C      | 125:THR   | N      | 12.20        |
| 1     | F     | 231:ALA    | C      | 235:ASP   | N      | 7.76         |
| 1     | A     | 176[A]:GLN | C      | 177:VAL   | N      | 5.41         |
| 1     | A     | 176[B]:GLN | C      | 177:VAL   | N      | 5.38         |
| 1     | D     | 360:PRO    | C      | 369:ARG   | N      | 2.73         |
| 1     | B     | 42:LEU     | C      | 45:GLN    | N      | 2.66         |

## 6 Fit of model and data [\(i\)](#)

### 6.1 Protein, DNA and RNA chains [\(i\)](#)

Unable to reproduce the depositors R factor - this section is therefore empty.

### 6.2 Non-standard residues in protein, DNA, RNA chains [\(i\)](#)

Unable to reproduce the depositors R factor - this section is therefore empty.

### 6.3 Carbohydrates [\(i\)](#)

Unable to reproduce the depositors R factor - this section is therefore empty.

### 6.4 Ligands [\(i\)](#)

Unable to reproduce the depositors R factor - this section is therefore empty.

The following is a graphical depiction of the model fit to experimental electron density of all instances of the Ligand of Interest. In addition, ligands with molecular weight > 250 and outliers as shown on the geometry validation Tables will also be included. Each fit is shown from different orientation to approximate a three-dimensional view.

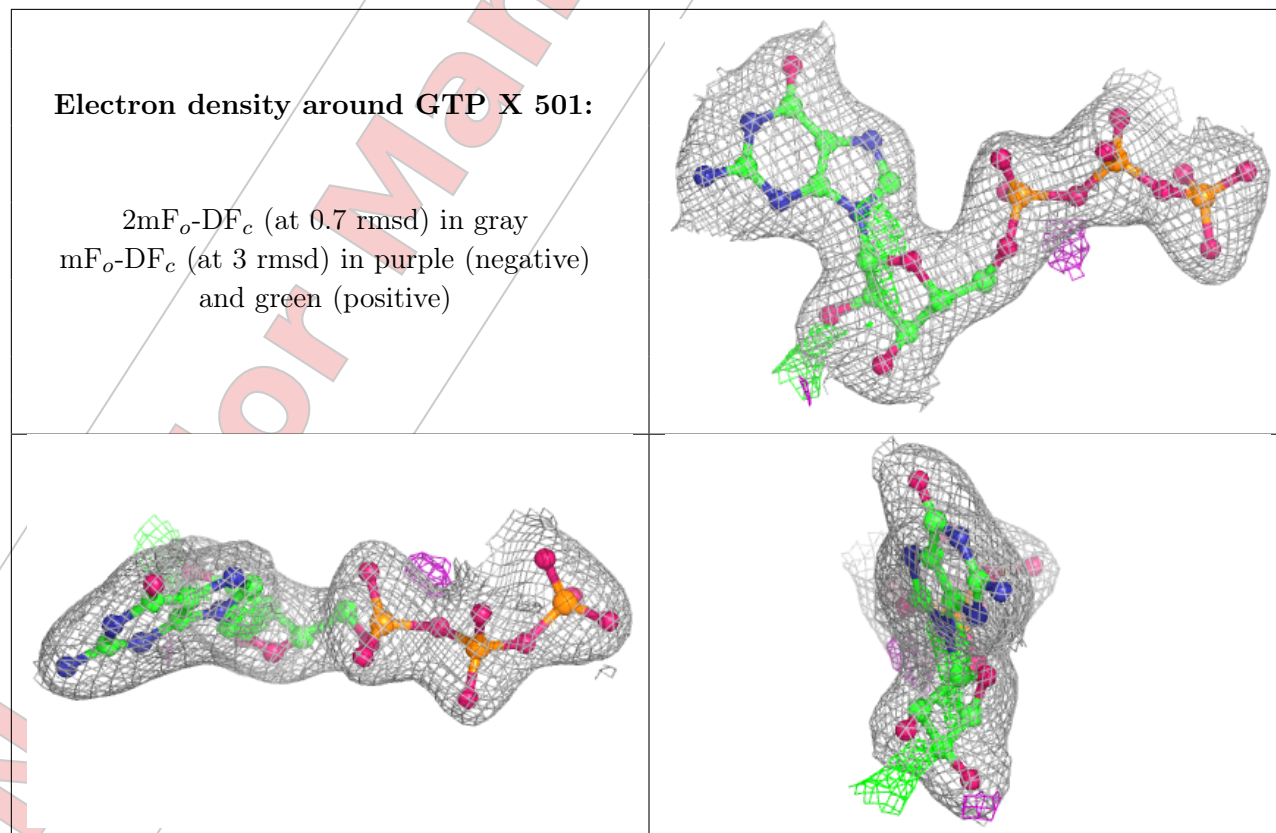

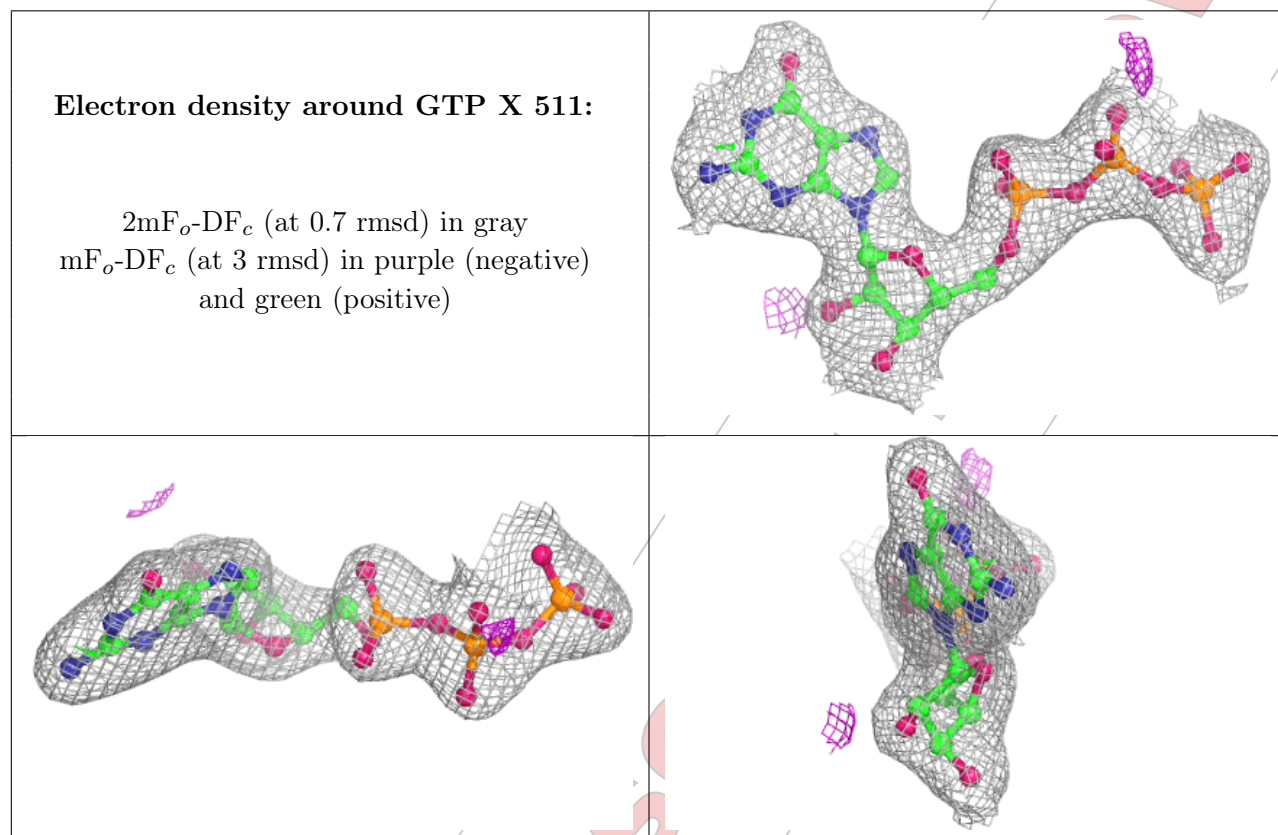

Not For Manuscript

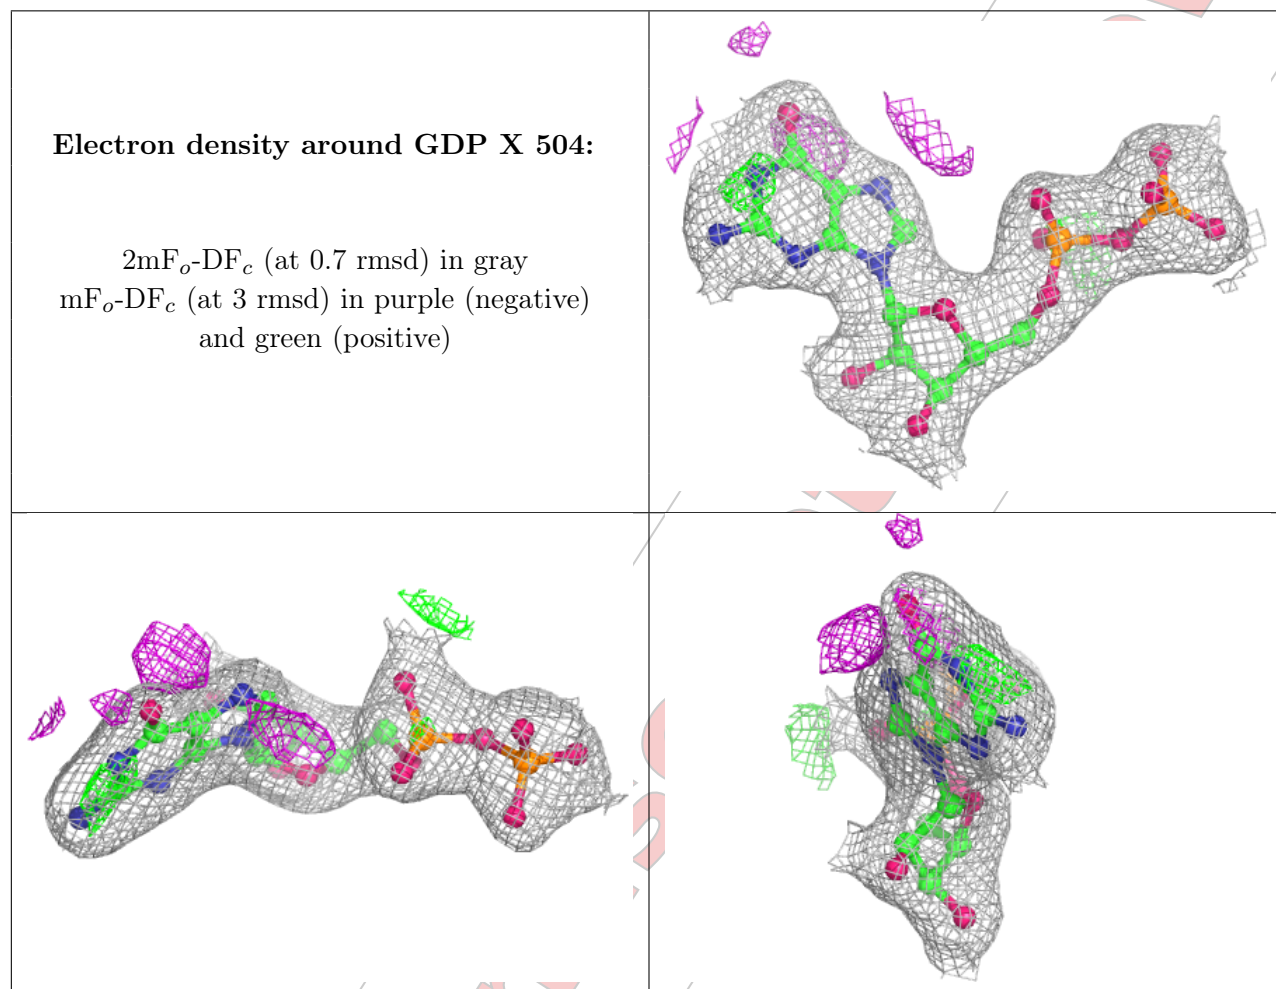

Not For Manuscript Review

**Electron density around GDP X 514:**

$2mF_o-DF_c$  (at 0.7 rmsd) in gray  
 $mF_o-DF_c$  (at 3 rmsd) in purple (negative)  
 and green (positive)

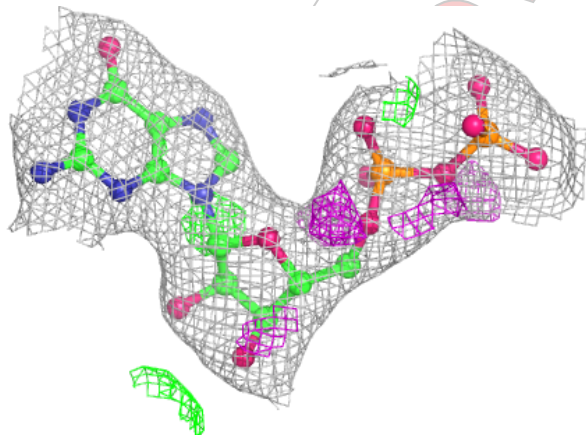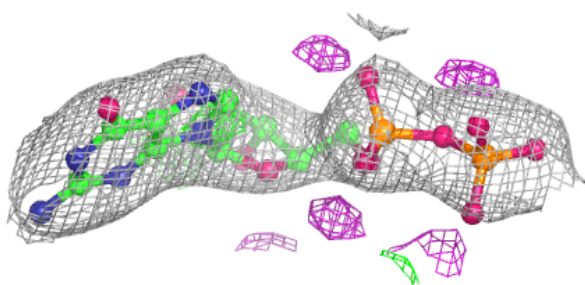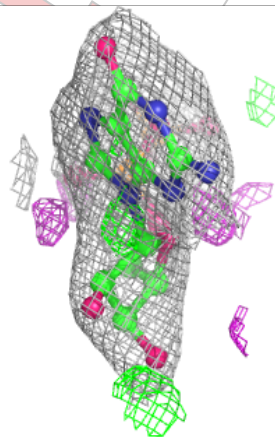

**Electron density around ACP X 506:**

$2mF_o-DF_c$  (at 0.7 rmsd) in gray  
 $mF_o-DF_c$  (at 3 rmsd) in purple (negative)  
 and green (positive)

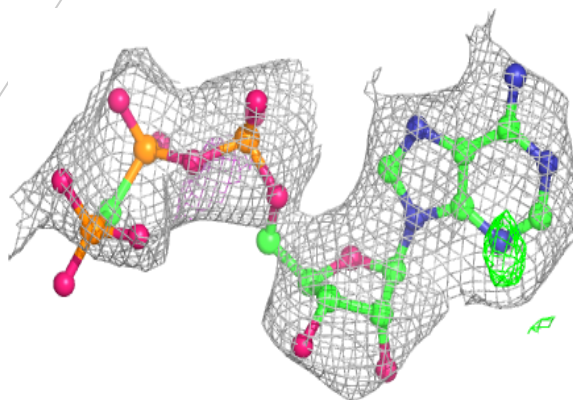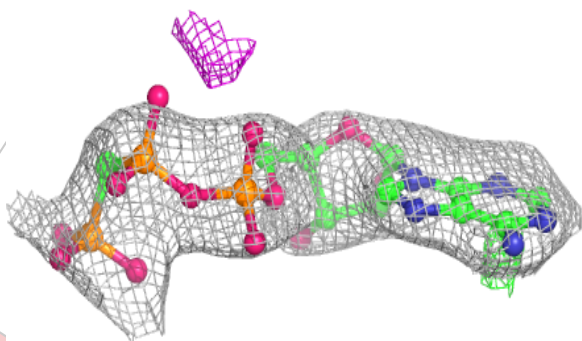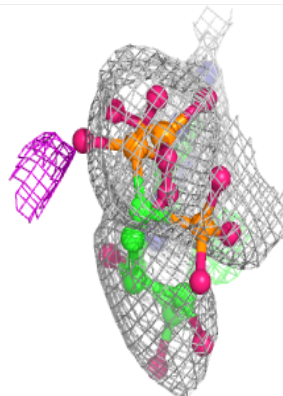

**Electron density around COL X 507:**

$2mF_o-DF_c$  (at 0.7 rmsd) in gray  
 $mF_o-DF_c$  (at 3 rmsd) in purple (negative)  
and green (positive)

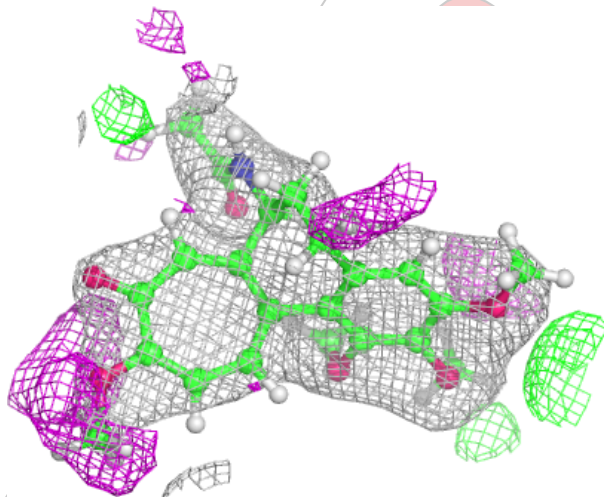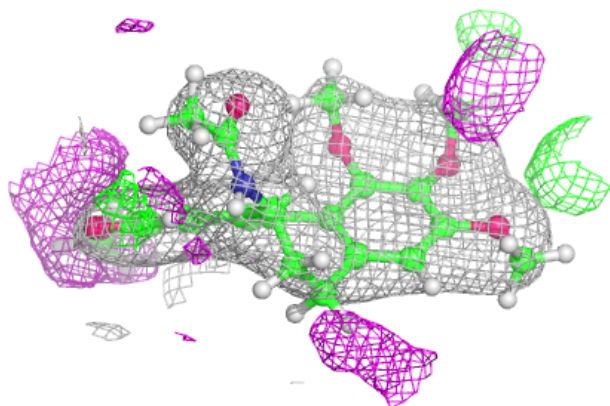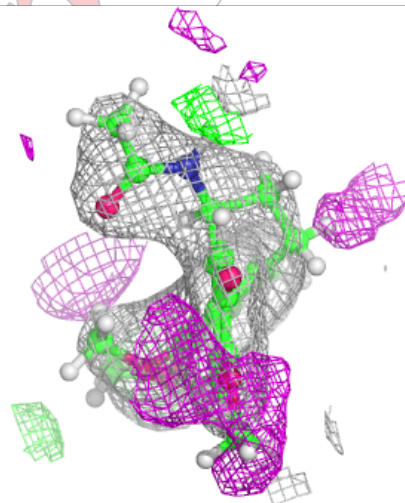

Not For Ma

**Electron density around EPA X 508:**

$2mF_o-DF_c$  (at 0.7 rmsd) in gray  
 $mF_o-DF_c$  (at 3 rmsd) in purple (negative)  
and green (positive)

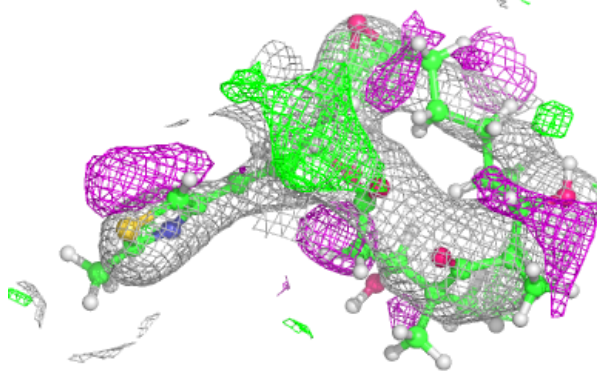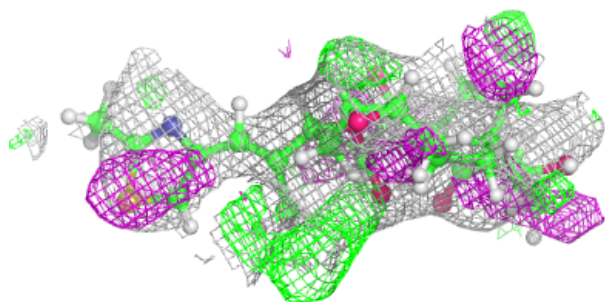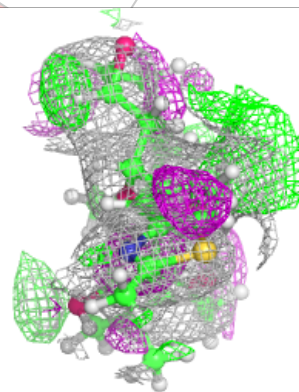

Not For Manuscript Review

**Electron density around EPA X 516:**

$2mF_o-DF_c$  (at 0.7 rmsd) in gray  
 $mF_o-DF_c$  (at 3 rmsd) in purple (negative)  
and green (positive)

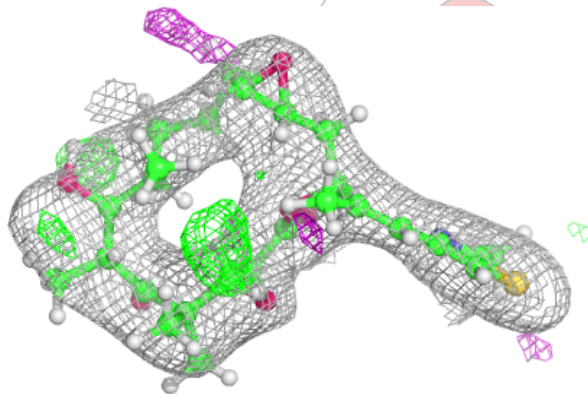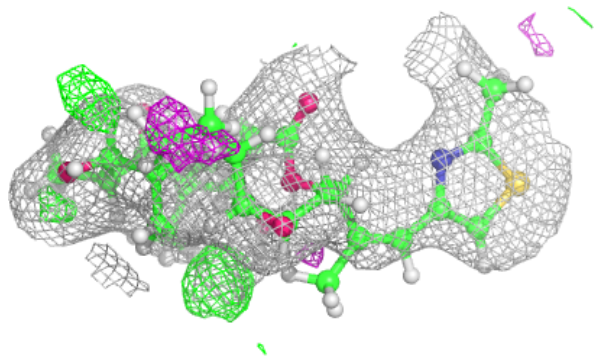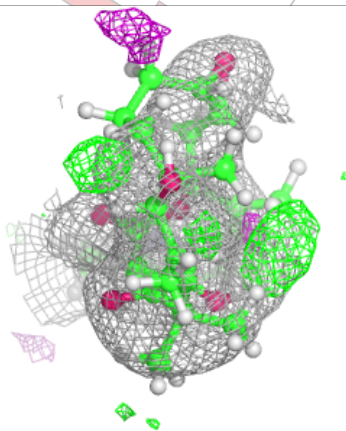

Not For Manuscript

**Electron density around VLB X 509:**

$2mF_o-DF_c$  (at 0.7 rmsd) in gray  
 $mF_o-DF_c$  (at 3 rmsd) in purple (negative)  
and green (positive)

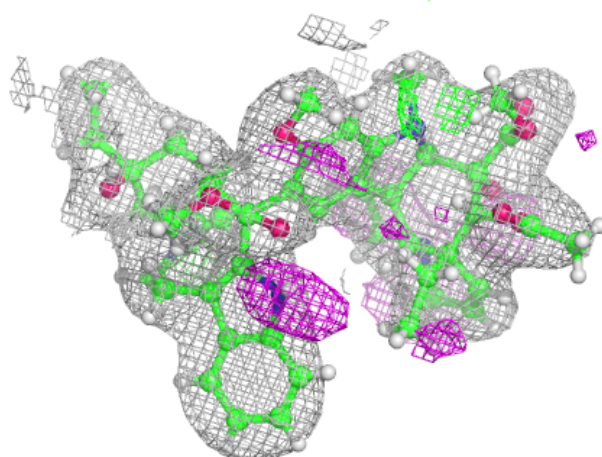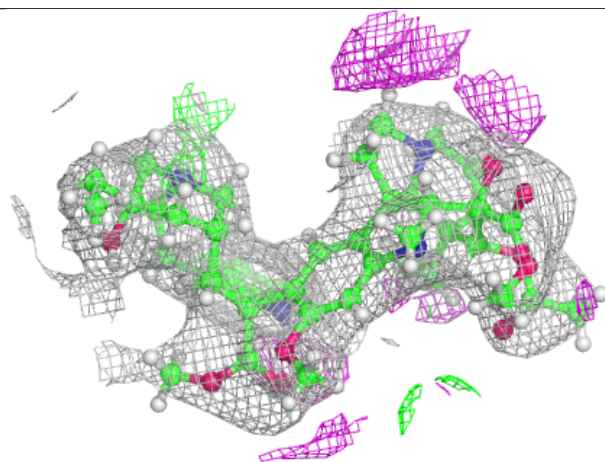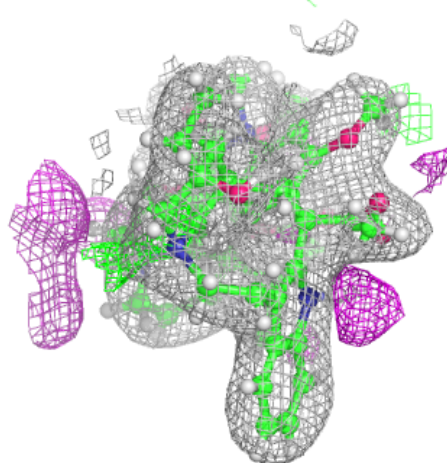

Not For Mail

**Electron density around POU X 510:**

$2mF_o-DF_c$  (at 0.7 rmsd) in gray  
 $mF_o-DF_c$  (at 3 rmsd) in purple (negative)  
and green (positive)

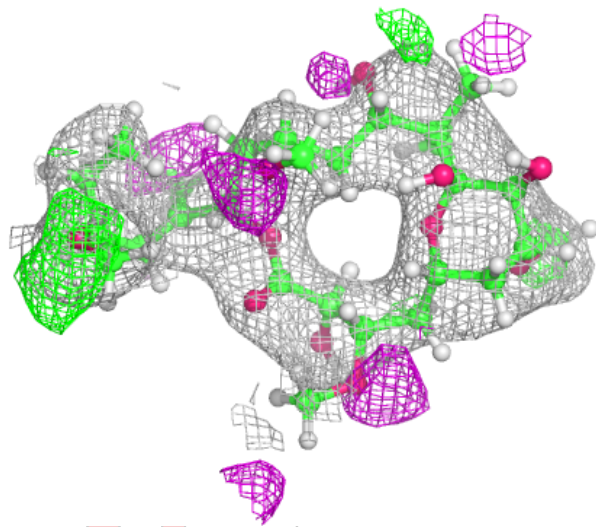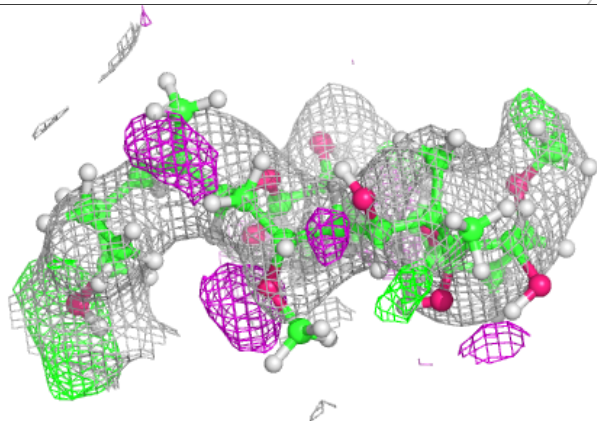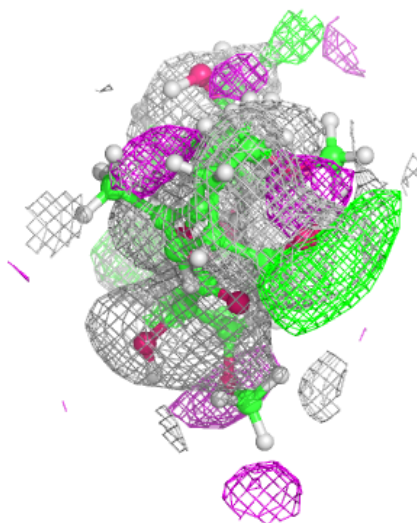

Not For M

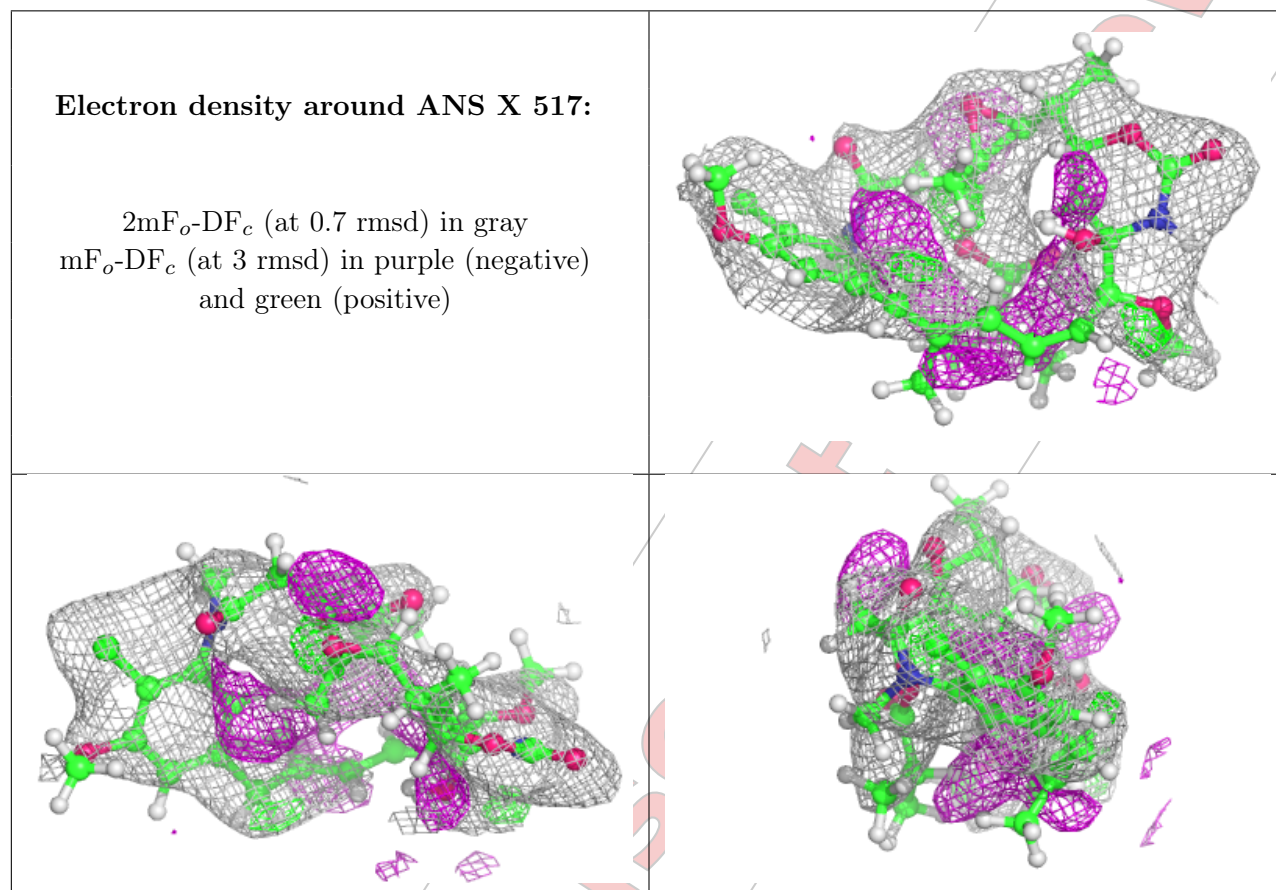

## 6.5 Other polymers [i](#)

Unable to reproduce the depositor's R factor - this section is therefore empty.

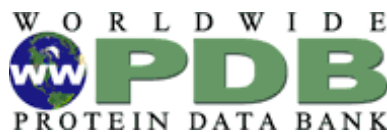

# Preliminary Full wwPDB X-ray Structure Validation Report ⓘ

Feb 6, 2023 – 02:27 pm GMT

Deposition ID : D\_1292128494

**This wwPDB validation report is NOT for manuscript review**

This is a Preliminary Full wwPDB X-ray Structure Validation Report.

This report is produced by the wwPDB Deposition System during initial deposition but before annotation of the structure.

We welcome your comments at [validation@mail.wwpdb.org](mailto:validation@mail.wwpdb.org)

A user guide is available at

<https://www.wwpdb.org/validation/2017/XrayValidationReportHelp>

with specific help available everywhere you see the ⓘ symbol.

The types of validation reports are described at

<http://www.wwpdb.org/validation/2017/FAQs#types>.

---

The following versions of software and data (see [references ⓘ](#)) were used in the production of this report:

|                                |   |                                                                    |
|--------------------------------|---|--------------------------------------------------------------------|
| MolProbity                     | : | 4.02b-467                                                          |
| Mogul                          | : | 1.8.4, CSD as541be (2020)                                          |
| Xtrriage (Phenix)              | : | 1.13                                                               |
| EDS                            | : | 2.32.1                                                             |
| Percentile statistics          | : | 20191225.v01 (using entries in the PDB archive December 25th 2019) |
| Refmac                         | : | 5.8.0158                                                           |
| CCP4                           | : | 7.0.044 (Gargrove)                                                 |
| Ideal geometry (proteins)      | : | Engh & Huber (2001)                                                |
| Ideal geometry (DNA, RNA)      | : | Parkinson et al. (1996)                                            |
| Validation Pipeline (wwPDB-VP) | : | 2.32.1                                                             |

# 1 Overall quality at a glance i

The following experimental techniques were used to determine the structure:

*X-RAY DIFFRACTION*

The reported resolution of this entry is 1.31 Å.

Percentile scores (ranging between 0-100) for global validation metrics of the entry are shown in the following graphic. The table shows the number of entries on which the scores are based.

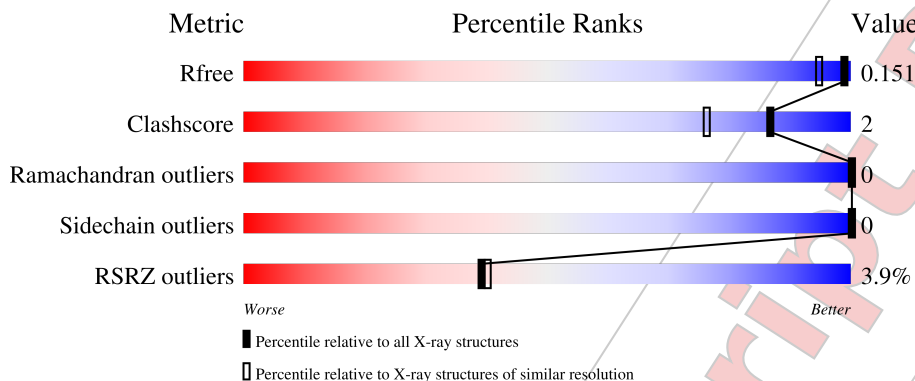

| Metric                | Whole archive<br>(#Entries) | Similar resolution<br>(#Entries, resolution range(Å)) |
|-----------------------|-----------------------------|-------------------------------------------------------|
| $R_{free}$            | 130704                      | 1611 (1.34-1.30)                                      |
| Clashscore            | 141614                      | 1667 (1.34-1.30)                                      |
| Ramachandran outliers | 138981                      | 1615 (1.34-1.30)                                      |
| Sidechain outliers    | 138945                      | 1615 (1.34-1.30)                                      |
| RSRZ outliers         | 127900                      | 1580 (1.34-1.30)                                      |

The table below summarises the geometric issues observed across the polymeric chains and their fit to the electron density. The red, orange, yellow and green segments of the lower bar indicate the fraction of residues that contain outliers for  $\geq 3$ , 2, 1 and 0 types of geometric quality criteria respectively. A grey segment represents the fraction of residues that are not modelled. The numeric value for each fraction is indicated below the corresponding segment, with a dot representing fractions  $\leq 5\%$ . The upper red bar (where present) indicates the fraction of residues that have poor fit to the electron density. The numeric value is given above the bar.

| Mol | Chain | Length | Quality of chain |
|-----|-------|--------|------------------|
| 1   | A     | 129    |                  |

## 2 Entry composition [i](#)

There are 6 unique types of molecules in this entry. The entry contains 1329 atoms, of which 0 are hydrogens and 0 are deuteriums.

In the tables below, the ZeroOcc column contains the number of atoms modelled with zero occupancy, the AltConf column contains the number of residues with at least one atom in alternate conformation and the Trace column contains the number of residues modelled with at most 2 atoms.

- Molecule 1 is a protein.

| Mol | Chain | Residues | Atoms |     |     |     |    | ZeroOcc | AltConf | Trace |
|-----|-------|----------|-------|-----|-----|-----|----|---------|---------|-------|
|     |       |          | Total | C   | N   | O   | S  |         |         |       |
| 1   | A     | 129      | 1199  | 726 | 247 | 216 | 10 | 1       | 19      | 0     |

- Molecule 2 is 1,2-ETHANEDIOL (three-letter code: EDO) (formula: C<sub>2</sub>H<sub>6</sub>O<sub>2</sub>).

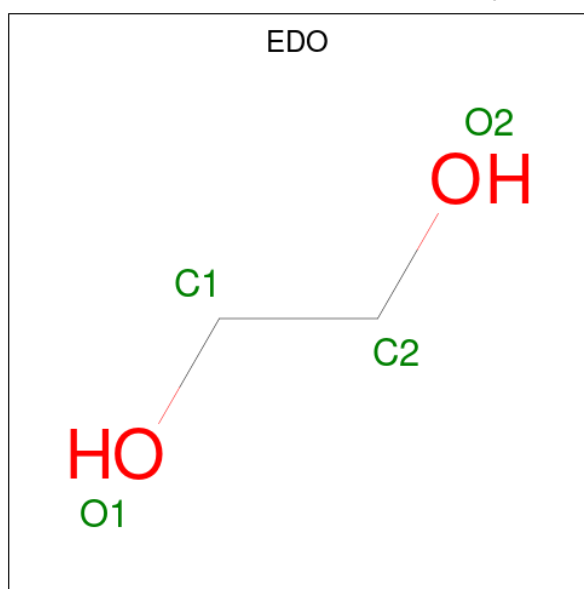

| Mol | Chain | Residues | Atoms |   |   | ZeroOcc | AltConf |
|-----|-------|----------|-------|---|---|---------|---------|
|     |       |          | Total | C | O |         |         |
| 2   | A     | 1        | 4     | 2 | 2 | 0       | 0       |

- Molecule 3 is CHLORIDE ION (three-letter code: CL) (formula: Cl).

| Mol | Chain | Residues | Atoms |    | ZeroOcc | AltConf |
|-----|-------|----------|-------|----|---------|---------|
| 3   | A     | 1        | Total | Cl | 0       | 0       |
|     |       |          | 1     | 1  |         |         |
| 3   | A     | 1        | Total | Cl | 0       | 0       |
|     |       |          | 1     | 1  |         |         |

- Molecule 4 is SODIUM ION (three-letter code: NA) (formula: Na).

| Mol | Chain | Residues | Atoms           | ZeroOcc | AltConf |
|-----|-------|----------|-----------------|---------|---------|
| 4   | A     | 1        | Total Na<br>1 1 | 0       | 0       |
| 4   | A     | 1        | Total Na<br>1 1 | 0       | 0       |

- Molecule 5 is PENTAETHYLENE GLYCOL (three-letter code: 1PE) (formula: C<sub>10</sub>H<sub>22</sub>O<sub>6</sub>).

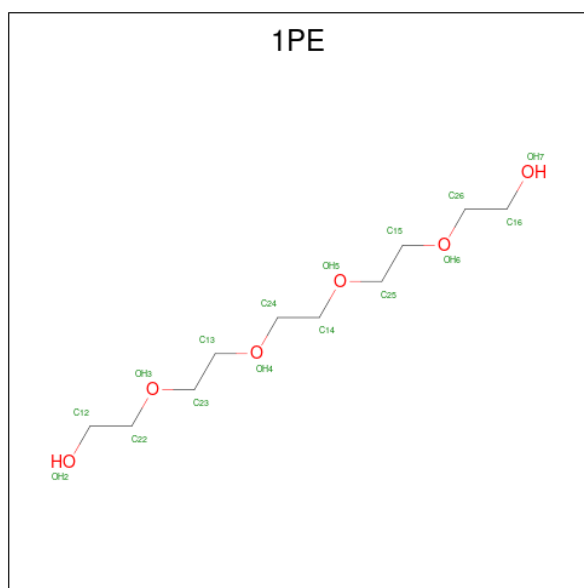

| Mol | Chain | Residues | Atoms              | ZeroOcc | AltConf |
|-----|-------|----------|--------------------|---------|---------|
| 5   | A     | 1        | Total C O<br>8 5 3 | 0       | 0       |

- Molecule 6 is water.

| Mol | Chain | Residues | Atoms              | ZeroOcc | AltConf |
|-----|-------|----------|--------------------|---------|---------|
| 6   | S     | 114      | Total O<br>114 114 | 0       | 3       |

### 3 Residue-property plots [i](#)

These plots are drawn for all protein, RNA, DNA and oligosaccharide chains in the entry. The first graphic for a chain summarises the proportions of the various outlier classes displayed in the second graphic. The second graphic shows the sequence view annotated by issues in geometry and electron density. Residues are color-coded according to the number of geometric quality criteria for which they contain at least one outlier: green = 0, yellow = 1, orange = 2 and red = 3 or more. A red dot above a residue indicates a poor fit to the electron density ( $RSRZ > 2$ ). Stretches of 2 or more consecutive residues without any outlier are shown as a green connector. Residues present in the sample, but not in the model, are shown in grey.

- Molecule 1:

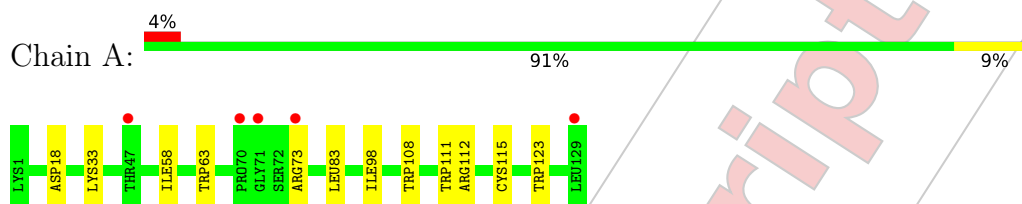

## 4 Data and refinement statistics i

| Property                                                                | Value                                                       | Source           |
|-------------------------------------------------------------------------|-------------------------------------------------------------|------------------|
| Space group                                                             | P 43 21 2                                                   | Depositor        |
| Cell constants<br>a, b, c, $\alpha$ , $\beta$ , $\gamma$                | 77.92Å 77.92Å 37.64Å<br>90.00° 90.00° 90.00°                | Depositor        |
| Resolution (Å)                                                          | 14.47 – 1.31<br>14.96 – 1.31                                | Depositor<br>EDS |
| % Data completeness<br>(in resolution range)                            | 92.4 (14.47-1.31)<br>92.4 (14.96-1.31)                      | Depositor<br>EDS |
| $R_{merge}$                                                             | (Not available)                                             | Depositor        |
| $R_{sym}$                                                               | (Not available)                                             | Depositor        |
| $\langle I/\sigma(I) \rangle$ <sup>1</sup>                              | 1.06 (at 1.31Å)                                             | Xtrriage         |
| Refinement program                                                      | unknown                                                     | Depositor        |
| R, $R_{free}$                                                           | 0.125 , 0.148<br>0.132 , 0.151                              | Depositor<br>DCC |
| $R_{free}$ test set                                                     | 2000 reflections (7.54%)                                    | wwPDB-VP         |
| Wilson B-factor (Å <sup>2</sup> )                                       | 17.1                                                        | Xtrriage         |
| Anisotropy                                                              | 0.001                                                       | Xtrriage         |
| Bulk solvent $k_{sol}$ (e/Å <sup>3</sup> ), $B_{sol}$ (Å <sup>2</sup> ) | 0.39 , 68.1                                                 | EDS              |
| L-test for twinning <sup>2</sup>                                        | $\langle  L  \rangle = 0.47$ , $\langle L^2 \rangle = 0.30$ | Xtrriage         |
| Estimated twinning fraction                                             | No twinning to report.                                      | Xtrriage         |
| $F_o, F_c$ correlation                                                  | 0.98                                                        | EDS              |
| Total number of atoms                                                   | 1329                                                        | wwPDB-VP         |
| Average B, all atoms (Å <sup>2</sup> )                                  | 24.0                                                        | wwPDB-VP         |

Xtrriage's analysis on translational NCS is as follows: *The largest off-origin peak in the Patterson function is 6.32% of the height of the origin peak. No significant pseudotranslation is detected.*

<sup>1</sup>Intensities estimated from amplitudes.

<sup>2</sup>Theoretical values of  $\langle |L| \rangle$ ,  $\langle L^2 \rangle$  for acentric reflections are 0.5, 0.333 respectively for untwinned datasets, and 0.375, 0.2 for perfectly twinned datasets.

## 5 Model quality [i](#)

### 5.1 Standard geometry [i](#)

Bond lengths and bond angles in the following residue types are not validated in this section: 1PE, CL, EDO, NA

The Z score for a bond length (or angle) is the number of standard deviations the observed value is removed from the expected value. A bond length (or angle) with  $|Z| > 5$  is considered an outlier worth inspection. RMSZ is the root-mean-square of all Z scores of the bond lengths (or angles).

| Mol | Chain | Bond lengths |         | Bond angles |               |
|-----|-------|--------------|---------|-------------|---------------|
|     |       | RMSZ         | # Z  >5 | RMSZ        | # Z  >5       |
| 1   | A     | 0.73         | 0/1221  | 0.90        | 1/1642 (0.1%) |

Chiral center outliers are detected by calculating the chiral volume of a chiral center and verifying if the center is modelled as a planar moiety or with the opposite hand. A planarity outlier is detected by checking planarity of atoms in a peptide group, atoms in a mainchain group or atoms of a sidechain that are expected to be planar.

| Mol | Chain | #Chirality outliers | #Planarity outliers |
|-----|-------|---------------------|---------------------|
| 1   | A     | 0                   | 3                   |

There are no bond length outliers.

All (1) bond angle outliers are listed below:

| Mol | Chain | Res | Type | Atoms | Z    | Observed(°) | Ideal(°) |
|-----|-------|-----|------|-------|------|-------------|----------|
| 1   | A     | 108 | TRP  | O-C-N | 5.47 | 131.46      | 122.70   |

There are no chirality outliers.

All (3) planarity outliers are listed below:

| Mol | Chain | Res    | Type | Group     |
|-----|-------|--------|------|-----------|
| 1   | A     | 112[A] | ARG  | Sidechain |
| 1   | A     | 73[A]  | ARG  | Mainchain |
| 1   | A     | 73[B]  | ARG  | Mainchain |

### 5.2 Too-close contacts [i](#)

In the following table, the Non-H and H(model) columns list the number of non-hydrogen atoms and hydrogen atoms in the chain respectively. The H(added) column lists the number of hydrogen atoms added and optimized by MolProbity. The Clashes column lists the number of clashes within

the asymmetric unit, whereas Symm-Clashes lists symmetry-related clashes.

| Mol | Chain | Non-H | H(model) | H(added) | Clashes | Symm-Clashes |
|-----|-------|-------|----------|----------|---------|--------------|
| 1   | A     | 1199  | 0        | 1151     | 5       | 0            |
| 2   | A     | 4     | 0        | 6        | 0       | 0            |
| 3   | A     | 2     | 0        | 0        | 0       | 0            |
| 4   | A     | 2     | 0        | 0        | 0       | 0            |
| 5   | A     | 8     | 0        | 9        | 0       | 0            |
| 6   | S     | 114   | 0        | 0        | 0       | 0            |
| All | All   | 1329  | 0        | 1166     | 5       | 0            |

The all-atom clashscore is defined as the number of clashes found per 1000 atoms (including hydrogen atoms). The all-atom clashscore for this structure is 2.

All (5) close contacts within the same asymmetric unit are listed below, sorted by their clash magnitude.

| Atom-1            | Atom-2          | Interatomic distance (Å) | Clash overlap (Å) |
|-------------------|-----------------|--------------------------|-------------------|
| 1:A:63:TRP:CE2    | 1:A:98:ILE:HG12 | 2.54                     | 0.43              |
| 1:A:18[B]:ASP:OD1 | 1:A:18[B]:ASP:N | 2.52                     | 0.42              |
| 1:A:111:TRP:CD1   | 1:A:115:CYS:HB2 | 2.55                     | 0.41              |
| 1:A:33:LYS:HG2    | 1:A:123:TRP:CH2 | 2.56                     | 0.41              |
| 1:A:58:ILE:HB     | 1:A:83:LEU:HD13 | 2.03                     | 0.40              |

There are no symmetry-related clashes.

### 5.3 Torsion angles [i](#)

#### 5.3.1 Protein backbone [i](#)

In the following table, the Percentiles column shows the percent Ramachandran outliers of the chain as a percentile score with respect to all X-ray entries followed by that with respect to entries of similar resolution.

The Analysed column shows the number of residues for which the backbone conformation was analysed, and the total number of residues.

| Mol | Chain | Analysed       | Favoured  | Allowed | Outliers | Percentiles           |
|-----|-------|----------------|-----------|---------|----------|-----------------------|
| 1   | A     | 147/129 (114%) | 144 (98%) | 3 (2%)  | 0        | <b>100</b> <b>100</b> |

There are no Ramachandran outliers to report.

### 5.3.2 Protein sidechains [i](#)

In the following table, the Percentiles column shows the percent sidechain outliers of the chain as a percentile score with respect to all X-ray entries followed by that with respect to entries of similar resolution.

The Analysed column shows the number of residues for which the sidechain conformation was analysed, and the total number of residues.

| Mol | Chain | Analysed       | Rotameric  | Outliers | Percentiles |     |
|-----|-------|----------------|------------|----------|-------------|-----|
| 1   | A     | 126/105 (120%) | 126 (100%) | 0        | 100         | 100 |

There are no protein residues with a non-rotameric sidechain to report.

Sometimes sidechains can be flipped to improve hydrogen bonding and reduce clashes. There are no such sidechains identified.

### 5.3.3 RNA [i](#)

There are no RNA molecules in this entry.

## 5.4 Non-standard residues in protein, DNA, RNA chains [i](#)

There are no non-standard protein/DNA/RNA residues in this entry.

### 5.5 Carbohydrates [i](#)

There are no monosaccharides in this entry.

## 5.6 Ligand geometry [i](#)

Of 6 ligands modelled in this entry, 4 are monoatomic - leaving 2 for Mogul analysis.

In the following table, the Counts columns list the number of bonds (or angles) for which Mogul statistics could be retrieved, the number of bonds (or angles) that are observed in the model and the number of bonds (or angles) that are defined in the Chemical Component Dictionary. The Link column lists molecule types, if any, to which the group is linked. The Z score for a bond length (or angle) is the number of standard deviations the observed value is removed from the expected value. A bond length (or angle) with  $|Z| > 2$  is considered an outlier worth inspection. RMSZ is the root-mean-square of all Z scores of the bond lengths (or angles).

| Mol | Type | Chain | Res  | Link | Bond lengths |      |             | Bond angles |      |             |
|-----|------|-------|------|------|--------------|------|-------------|-------------|------|-------------|
|     |      |       |      |      | Counts       | RMSZ | $\# Z  > 2$ | Counts      | RMSZ | $\# Z  > 2$ |
| 5   | 1PE  | A     | 1147 | -    | 7,7,15       | 0.24 | 0           | 6,6,14      | 0.09 | 0           |

| Mol | Type | Chain | Res  | Link | Bond lengths |      |          | Bond angles |      |          |
|-----|------|-------|------|------|--------------|------|----------|-------------|------|----------|
|     |      |       |      |      | Counts       | RMSZ | # Z  > 2 | Counts      | RMSZ | # Z  > 2 |
| 2   | EDO  | A     | 1136 | -    | 3,3,3        | 0.47 | 0        | 2,2,2       | 0.17 | 0        |

In the following table, the Chirals column lists the number of chiral outliers, the number of chiral centers analysed, the number of these observed in the model and the number defined in the Chemical Component Dictionary. Similar counts are reported in the Torsion and Rings columns. '-' means no outliers of that kind were identified.

| Mol | Type | Chain | Res  | Link | Chirals | Torsions | Rings |
|-----|------|-------|------|------|---------|----------|-------|
| 5   | 1PE  | A     | 1147 | -    | -       | 3/5/5/13 | -     |
| 2   | EDO  | A     | 1136 | -    | -       | 1/1/1/1  | -     |

There are no bond length outliers.

There are no bond angle outliers.

There are no chirality outliers.

All (4) torsion outliers are listed below:

| Mol | Chain | Res  | Type | Atoms           |
|-----|-------|------|------|-----------------|
| 2   | A     | 1136 | EDO  | O1-C1-C2-O2     |
| 5   | A     | 1147 | 1PE  | C23-C13-OH4-C24 |
| 5   | A     | 1147 | 1PE  | OH2-C12-C22-OH3 |
| 5   | A     | 1147 | 1PE  | OH4-C13-C23-OH3 |

There are no ring outliers.

No monomer is involved in short contacts.

## 5.7 Other polymers [i](#)

There are no such residues in this entry.

## 5.8 Polymer linkage issues [i](#)

There are no chain breaks in this entry.

## 6 Fit of model and data [i](#)

### 6.1 Protein, DNA and RNA chains [i](#)

In the following table, the column labelled '#RSRZ > 2' contains the number (and percentage) of RSRZ outliers, followed by percent RSRZ outliers for the chain as percentile scores relative to all X-ray entries and entries of similar resolution. The OWAB column contains the minimum, median, 95<sup>th</sup> percentile and maximum values of the occupancy-weighted average B-factor per residue. The column labelled 'Q < 0.9' lists the number of (and percentage) of residues with an average occupancy less than 0.9.

| Mol | Chain | Analysed       | <RSRZ> | #RSRZ > 2    | OWAB(Å <sup>2</sup> ) | Q < 0.9 |
|-----|-------|----------------|--------|--------------|-----------------------|---------|
| 1   | A     | 129/129 (100%) | -0.02  | 5 (3%) 39 40 | 14, 19, 31, 44        | 2 (1%)  |

All (5) RSRZ outliers are listed below:

| Mol | Chain | Res   | Type | RSRZ |
|-----|-------|-------|------|------|
| 1   | A     | 71    | GLY  | 4.0  |
| 1   | A     | 47    | THR  | 3.1  |
| 1   | A     | 70    | PRO  | 2.9  |
| 1   | A     | 129   | LEU  | 2.5  |
| 1   | A     | 73[A] | ARG  | 2.2  |

### 6.2 Non-standard residues in protein, DNA, RNA chains [i](#)

There are no non-standard protein/DNA/RNA residues in this entry.

### 6.3 Carbohydrates [i](#)

There are no monosaccharides in this entry.

### 6.4 Ligands [i](#)

In the following table, the Atoms column lists the number of modelled atoms in the group and the number defined in the chemical component dictionary. The B-factors column lists the minimum, median, 95<sup>th</sup> percentile and maximum values of B factors of atoms in the group. The column labelled 'Q < 0.9' lists the number of atoms with occupancy less than 0.9.

| Mol | Type | Chain | Res  | Atoms | RSCC | RSR  | B-factors(Å <sup>2</sup> ) | Q < 0.9 |
|-----|------|-------|------|-------|------|------|----------------------------|---------|
| 5   | IPE  | A     | 1147 | 8/?   | 0.78 | 0.13 | 63,63,64,64                | 0       |
| 2   | EDO  | A     | 1136 | 4/?   | 0.94 | 0.06 | 53,53,53,54                | 0       |

*Continued on next page...*

Continued from previous page...

| Mol | Type | Chain | Res  | Atoms | RSCC | RSR  | B-factors( $\text{\AA}^2$ ) | Q<0.9 |
|-----|------|-------|------|-------|------|------|-----------------------------|-------|
| 4   | NA   | A     | 1146 | 1/?   | 0.99 | 0.04 | 23,23,23,23                 | 0     |
| 4   | NA   | A     | 1145 | 1/?   | 0.99 | 0.05 | 23,23,23,23                 | 0     |
| 3   | CL   | A     | 1139 | 1/?   | 1.00 | 0.04 | 28,28,28,28                 | 1     |
| 3   | CL   | A     | 1137 | 1/?   | 1.00 | 0.14 | 21,21,21,21                 | 1     |

## 6.5 Other polymers [i](#)

There are no such residues in this entry.



# Preliminary Full wwPDB X-ray Structure Validation Report ⓘ

Feb 6, 2023 – 10:43 am GMT

Deposition ID : D\_1292128476

**This wwPDB validation report is NOT for manuscript review**

This is a Preliminary Full wwPDB X-ray Structure Validation Report.

This report is produced by the wwPDB Deposition System during initial deposition but before annotation of the structure.

We welcome your comments at [validation@mail.wwpdb.org](mailto:validation@mail.wwpdb.org)

A user guide is available at

<https://www.wwpdb.org/validation/2017/XrayValidationReportHelp>

with specific help available everywhere you see the ⓘ symbol.

The types of validation reports are described at

<http://www.wwpdb.org/validation/2017/FAQs#types>.

---

The following versions of software and data (see [references ⓘ](#)) were used in the production of this report:

|                                |   |                                                                    |
|--------------------------------|---|--------------------------------------------------------------------|
| MolProbity                     | : | 4.02b-467                                                          |
| Mogul                          | : | 1.8.4, CSD as541be (2020)                                          |
| Xtrriage (Phenix)              | : | 1.13                                                               |
| EDS                            | : | 2.32.1                                                             |
| Percentile statistics          | : | 20191225.v01 (using entries in the PDB archive December 25th 2019) |
| Refmac                         | : | 5.8.0158                                                           |
| CCP4                           | : | 7.0.044 (Gargrove)                                                 |
| Ideal geometry (proteins)      | : | Engh & Huber (2001)                                                |
| Ideal geometry (DNA, RNA)      | : | Parkinson et al. (1996)                                            |
| Validation Pipeline (wwPDB-VP) | : | 2.32.1                                                             |

# 1 Overall quality at a glance i

The following experimental techniques were used to determine the structure:

*X-RAY DIFFRACTION*

The reported resolution of this entry is 1.32 Å.

Percentile scores (ranging between 0-100) for global validation metrics of the entry are shown in the following graphic. The table shows the number of entries on which the scores are based.

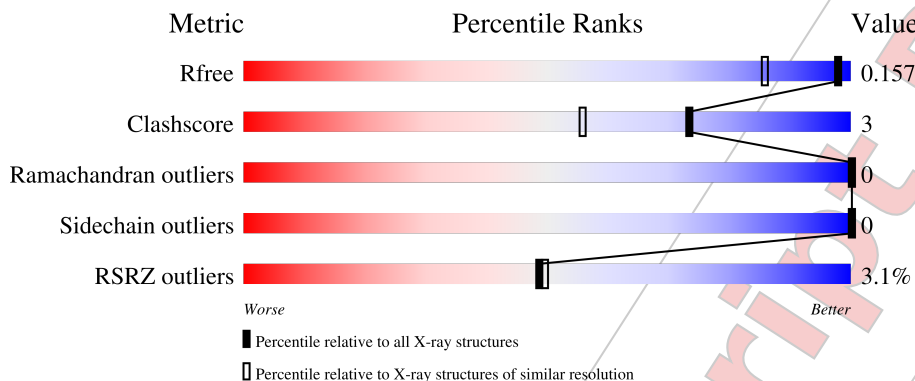

| Metric                | Whole archive<br>(#Entries) | Similar resolution<br>(#Entries, resolution range(Å)) |
|-----------------------|-----------------------------|-------------------------------------------------------|
| $R_{free}$            | 130704                      | 1611 (1.34-1.30)                                      |
| Clashscore            | 141614                      | 1667 (1.34-1.30)                                      |
| Ramachandran outliers | 138981                      | 1615 (1.34-1.30)                                      |
| Sidechain outliers    | 138945                      | 1615 (1.34-1.30)                                      |
| RSRZ outliers         | 127900                      | 1580 (1.34-1.30)                                      |

The table below summarises the geometric issues observed across the polymeric chains and their fit to the electron density. The red, orange, yellow and green segments of the lower bar indicate the fraction of residues that contain outliers for  $\geq 3$ , 2, 1 and 0 types of geometric quality criteria respectively. A grey segment represents the fraction of residues that are not modelled. The numeric value for each fraction is indicated below the corresponding segment, with a dot representing fractions  $\leq 5\%$ . The upper red bar (where present) indicates the fraction of residues that have poor fit to the electron density. The numeric value is given above the bar.

| Mol | Chain | Length | Quality of chain |
|-----|-------|--------|------------------|
| 1   | A     | 129    |                  |

## 2 Entry composition [i](#)

There are 6 unique types of molecules in this entry. The entry contains 1343 atoms, of which 0 are hydrogens and 0 are deuteriums.

In the tables below, the ZeroOcc column contains the number of atoms modelled with zero occupancy, the AltConf column contains the number of residues with at least one atom in alternate conformation and the Trace column contains the number of residues modelled with at most 2 atoms.

- Molecule 1 is a protein.

| Mol | Chain | Residues | Atoms |     |     |     |    | ZeroOcc | AltConf | Trace |
|-----|-------|----------|-------|-----|-----|-----|----|---------|---------|-------|
|     |       |          | Total | C   | N   | O   | S  |         |         |       |
| 1   | A     | 129      | 1190  | 722 | 244 | 214 | 10 | 2       | 19      | 0     |

- Molecule 2 is CHLORIDE ION (three-letter code: CL) (formula: Cl).

| Mol | Chain | Residues | Atoms |    | ZeroOcc | AltConf |
|-----|-------|----------|-------|----|---------|---------|
| 2   | A     | 1        | Total | Cl | 0       | 0       |
|     |       |          | 1     | 1  |         |         |
| 2   | A     | 1        | Total | Cl | 0       | 0       |
|     |       |          | 1     | 1  |         |         |
| 2   | A     | 1        | Total | Cl | 0       | 0       |
|     |       |          | 1     | 1  |         |         |

- Molecule 3 is SODIUM ION (three-letter code: NA) (formula: Na).

| Mol | Chain | Residues | Atoms |    | ZeroOcc | AltConf |
|-----|-------|----------|-------|----|---------|---------|
| 3   | A     | 1        | Total | Na | 0       | 0       |
|     |       |          | 1     | 1  |         |         |
| 3   | A     | 1        | Total | Na | 0       | 0       |
|     |       |          | 1     | 1  |         |         |

- Molecule 4 is PENTAETHYLENE GLYCOL (three-letter code: 1PE) (formula: C<sub>10</sub>H<sub>22</sub>O<sub>6</sub>).

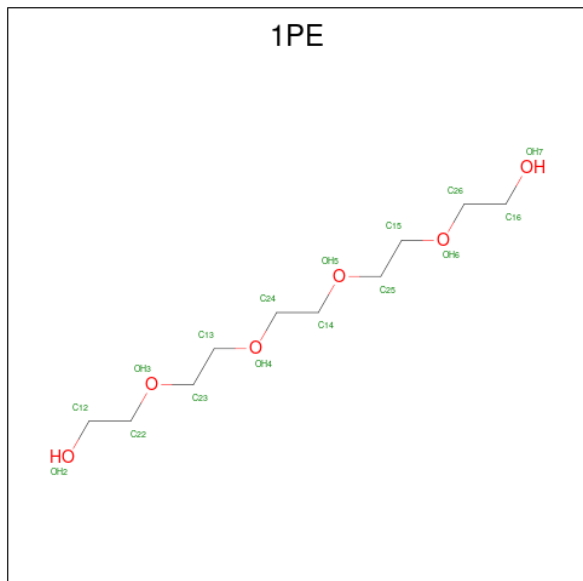

| Mol | Chain | Residues | Atoms |   |   | ZeroOcc | AltConf |
|-----|-------|----------|-------|---|---|---------|---------|
| 4   | A     | 1        | Total | C | O | 0       | 0       |
|     |       |          | 8     | 5 | 3 |         |         |
| 4   | A     | 1        | Total | C | O | 0       | 0       |
|     |       |          | 7     | 4 | 3 |         |         |

- Molecule 5 is 1,2-ETHANEDIOL (three-letter code: EDO) (formula: C<sub>2</sub>H<sub>6</sub>O<sub>2</sub>).

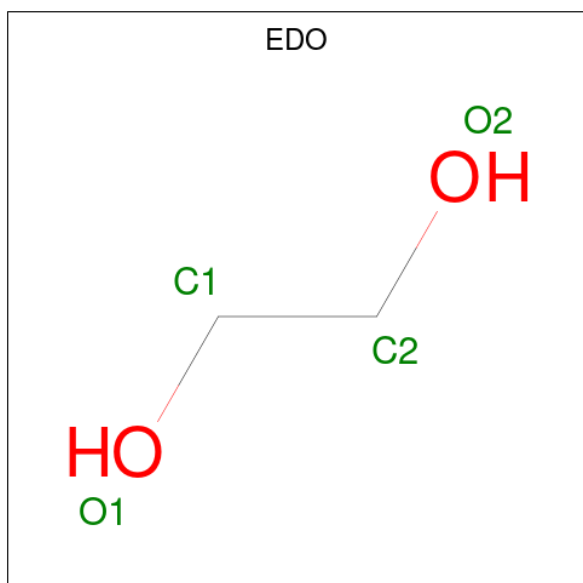

| Mol | Chain | Residues | Atoms |   |   | ZeroOcc | AltConf |
|-----|-------|----------|-------|---|---|---------|---------|
| 5   | A     | 1        | Total | C | O | 0       | 0       |
|     |       |          | 4     | 2 | 2 |         |         |

- Molecule 6 is water.

| Mol | Chain | Residues | Atoms |     | ZeroOcc | AltConf |
|-----|-------|----------|-------|-----|---------|---------|
| 6   | S     | 129      | Total | O   | 0       | 3       |
|     |       |          | 129   | 129 |         |         |

Not For Manuscript Review

### 3 Residue-property plots [i](#)

These plots are drawn for all protein, RNA, DNA and oligosaccharide chains in the entry. The first graphic for a chain summarises the proportions of the various outlier classes displayed in the second graphic. The second graphic shows the sequence view annotated by issues in geometry and electron density. Residues are color-coded according to the number of geometric quality criteria for which they contain at least one outlier: green = 0, yellow = 1, orange = 2 and red = 3 or more. A red dot above a residue indicates a poor fit to the electron density ( $RSRZ > 2$ ). Stretches of 2 or more consecutive residues without any outlier are shown as a green connector. Residues present in the sample, but not in the model, are shown in grey.

- Molecule 1:

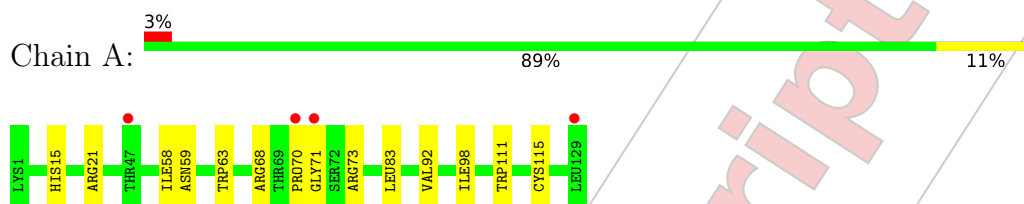

## 4 Data and refinement statistics i

| Property                                                                | Value                                                       | Source           |
|-------------------------------------------------------------------------|-------------------------------------------------------------|------------------|
| Space group                                                             | P 43 21 2                                                   | Depositor        |
| Cell constants<br>a, b, c, $\alpha$ , $\beta$ , $\gamma$                | 77.90Å 77.90Å 37.69Å<br>90.00° 90.00° 90.00°                | Depositor        |
| Resolution (Å)                                                          | 13.54 – 1.32<br>14.97 – 1.32                                | Depositor<br>EDS |
| % Data completeness<br>(in resolution range)                            | 93.0 (13.54-1.32)<br>93.1 (14.97-1.32)                      | Depositor<br>EDS |
| $R_{merge}$                                                             | (Not available)                                             | Depositor        |
| $R_{sym}$                                                               | (Not available)                                             | Depositor        |
| $\langle I/\sigma(I) \rangle$ <sup>1</sup>                              | 1.19 (at 1.32Å)                                             | Xtrriage         |
| Refinement program                                                      | .                                                           | Depositor        |
| R, $R_{free}$                                                           | 0.121 , 0.156<br>0.125 , 0.157                              | Depositor<br>DCC |
| $R_{free}$ test set                                                     | 2000 reflections (7.79%)                                    | wwPDB-VP         |
| Wilson B-factor (Å <sup>2</sup> )                                       | 16.5                                                        | Xtrriage         |
| Anisotropy                                                              | 0.002                                                       | Xtrriage         |
| Bulk solvent $k_{sol}$ (e/Å <sup>3</sup> ), $B_{sol}$ (Å <sup>2</sup> ) | 0.36 , 53.5                                                 | EDS              |
| L-test for twinning <sup>2</sup>                                        | $\langle  L  \rangle = 0.48$ , $\langle L^2 \rangle = 0.32$ | Xtrriage         |
| Estimated twinning fraction                                             | No twinning to report.                                      | Xtrriage         |
| $F_o, F_c$ correlation                                                  | 0.98                                                        | EDS              |
| Total number of atoms                                                   | 1343                                                        | wwPDB-VP         |
| Average B, all atoms (Å <sup>2</sup> )                                  | 24.0                                                        | wwPDB-VP         |

Xtrriage's analysis on translational NCS is as follows: *The largest off-origin peak in the Patterson function is 5.81% of the height of the origin peak. No significant pseudotranslation is detected.*

<sup>1</sup>Intensities estimated from amplitudes.

<sup>2</sup>Theoretical values of  $\langle |L| \rangle$ ,  $\langle L^2 \rangle$  for acentric reflections are 0.5, 0.333 respectively for untwinned datasets, and 0.375, 0.2 for perfectly twinned datasets.

## 5 Model quality [i](#)

### 5.1 Standard geometry [i](#)

Bond lengths and bond angles in the following residue types are not validated in this section: 1PE, CL, EDO, NA

The Z score for a bond length (or angle) is the number of standard deviations the observed value is removed from the expected value. A bond length (or angle) with  $|Z| > 5$  is considered an outlier worth inspection. RMSZ is the root-mean-square of all Z scores of the bond lengths (or angles).

| Mol | Chain | Bond lengths |         | Bond angles |         |
|-----|-------|--------------|---------|-------------|---------|
|     |       | RMSZ         | # Z  >5 | RMSZ        | # Z  >5 |
| 1   | A     | 0.73         | 0/1212  | 0.85        | 0/1630  |

There are no bond length outliers.

There are no bond angle outliers.

There are no chirality outliers.

There are no planarity outliers.

### 5.2 Too-close contacts [i](#)

In the following table, the Non-H and H(model) columns list the number of non-hydrogen atoms and hydrogen atoms in the chain respectively. The H(added) column lists the number of hydrogen atoms added and optimized by MolProbity. The Clashes column lists the number of clashes within the asymmetric unit, whereas Symm-Clashes lists symmetry-related clashes.

| Mol | Chain | Non-H | H(model) | H(added) | Clashes | Symm-Clashes |
|-----|-------|-------|----------|----------|---------|--------------|
| 1   | A     | 1190  | 0        | 1144     | 8       | 0            |
| 2   | A     | 3     | 0        | 0        | 0       | 0            |
| 3   | A     | 2     | 0        | 0        | 0       | 0            |
| 4   | A     | 15    | 0        | 18       | 0       | 0            |
| 5   | A     | 4     | 0        | 6        | 0       | 0            |
| 6   | S     | 129   | 0        | 0        | 2       | 0            |
| All | All   | 1343  | 0        | 1168     | 8       | 0            |

The all-atom clashscore is defined as the number of clashes found per 1000 atoms (including hydrogen atoms). The all-atom clashscore for this structure is 3.

All (8) close contacts within the same asymmetric unit are listed below, sorted by their clash magnitude.

| Atom-1            | Atom-2            | Interatomic distance (Å) | Clash overlap (Å) |
|-------------------|-------------------|--------------------------|-------------------|
| 1:A:21[A]:ARG:NH1 | 6:S:98:HOH:O      | 2.29                     | 0.63              |
| 1:A:59[B]:ASN:ND2 | 6:S:19:HOH:O      | 2.43                     | 0.51              |
| 1:A:68[A]:ARG:O   | 1:A:70:PRO:HD3    | 2.11                     | 0.50              |
| 1:A:15:HIS:HB3    | 1:A:92:VAL:HG11   | 1.95                     | 0.49              |
| 1:A:63:TRP:CE2    | 1:A:98:ILE:HG12   | 2.51                     | 0.46              |
| 1:A:71:GLY:O      | 1:A:73[B]:ARG:NH1 | 2.50                     | 0.45              |
| 1:A:58:ILE:HB     | 1:A:83:LEU:HD13   | 2.01                     | 0.42              |
| 1:A:111:TRP:CD1   | 1:A:115:CYS:HB2   | 2.56                     | 0.41              |

There are no symmetry-related clashes.

### 5.3 Torsion angles [i](#)

#### 5.3.1 Protein backbone [i](#)

In the following table, the Percentiles column shows the percent Ramachandran outliers of the chain as a percentile score with respect to all X-ray entries followed by that with respect to entries of similar resolution.

The Analysed column shows the number of residues for which the backbone conformation was analysed, and the total number of residues.

| Mol | Chain | Analysed       | Favoured  | Allowed | Outliers | Percentiles             |
|-----|-------|----------------|-----------|---------|----------|-------------------------|
| 1   | A     | 146/129 (113%) | 145 (99%) | 1 (1%)  | 0        | <b>100</b>   <b>100</b> |

There are no Ramachandran outliers to report.

#### 5.3.2 Protein sidechains [i](#)

In the following table, the Percentiles column shows the percent sidechain outliers of the chain as a percentile score with respect to all X-ray entries followed by that with respect to entries of similar resolution.

The Analysed column shows the number of residues for which the sidechain conformation was analysed, and the total number of residues.

| Mol | Chain | Analysed       | Rotameric  | Outliers | Percentiles             |
|-----|-------|----------------|------------|----------|-------------------------|
| 1   | A     | 125/105 (119%) | 125 (100%) | 0        | <b>100</b>   <b>100</b> |

There are no protein residues with a non-rotameric sidechain to report.

Sometimes sidechains can be flipped to improve hydrogen bonding and reduce clashes. There are

no such sidechains identified.

### 5.3.3 RNA [i](#)

There are no RNA molecules in this entry.

### 5.4 Non-standard residues in protein, DNA, RNA chains [i](#)

There are no non-standard protein/DNA/RNA residues in this entry.

### 5.5 Carbohydrates [i](#)

There are no monosaccharides in this entry.

### 5.6 Ligand geometry [i](#)

Of 8 ligands modelled in this entry, 5 are monoatomic - leaving 3 for Mogul analysis.

In the following table, the Counts columns list the number of bonds (or angles) for which Mogul statistics could be retrieved, the number of bonds (or angles) that are observed in the model and the number of bonds (or angles) that are defined in the Chemical Component Dictionary. The Link column lists molecule types, if any, to which the group is linked. The Z score for a bond length (or angle) is the number of standard deviations the observed value is removed from the expected value. A bond length (or angle) with  $|Z| > 2$  is considered an outlier worth inspection. RMSZ is the root-mean-square of all Z scores of the bond lengths (or angles).

| Mol | Type | Chain | Res  | Link | Bond lengths |      |          | Bond angles |      |          |
|-----|------|-------|------|------|--------------|------|----------|-------------|------|----------|
|     |      |       |      |      | Counts       | RMSZ | # Z  > 2 | Counts      | RMSZ | # Z  > 2 |
| 4   | 1PE  | A     | 1148 | -    | 6,6,15       | 0.07 | 0        | 5,5,14      | 0.33 | 0        |
| 4   | 1PE  | A     | 1147 | -    | 7,7,15       | 0.17 | 0        | 6,6,14      | 0.28 | 0        |
| 5   | EDO  | A     | 1149 | -    | 3,3,3        | 0.43 | 0        | 2,2,2       | 0.35 | 0        |

In the following table, the Chirals column lists the number of chiral outliers, the number of chiral centers analysed, the number of these observed in the model and the number defined in the Chemical Component Dictionary. Similar counts are reported in the Torsion and Rings columns. '-' means no outliers of that kind were identified.

| Mol | Type | Chain | Res  | Link | Chirals | Torsions | Rings |
|-----|------|-------|------|------|---------|----------|-------|
| 4   | 1PE  | A     | 1148 | -    | -       | 0/4/4/13 | -     |
| 4   | 1PE  | A     | 1147 | -    | -       | 2/5/5/13 | -     |
| 5   | EDO  | A     | 1149 | -    | -       | 1/1/1/1  | -     |

There are no bond length outliers.

There are no bond angle outliers.

There are no chirality outliers.

All (3) torsion outliers are listed below:

| Mol | Chain | Res  | Type | Atoms           |
|-----|-------|------|------|-----------------|
| 4   | A     | 1147 | 1PE  | C23-C13-OH4-C24 |
| 5   | A     | 1149 | EDO  | O1-C1-C2-O2     |
| 4   | A     | 1147 | 1PE  | OH4-C13-C23-OH3 |

There are no ring outliers.

No monomer is involved in short contacts.

## 5.7 Other polymers [i](#)

There are no such residues in this entry.

## 5.8 Polymer linkage issues [i](#)

There are no chain breaks in this entry.

## 6 Fit of model and data [i](#)

### 6.1 Protein, DNA and RNA chains [i](#)

In the following table, the column labelled '#RSRZ > 2' contains the number (and percentage) of RSRZ outliers, followed by percent RSRZ outliers for the chain as percentile scores relative to all X-ray entries and entries of similar resolution. The OWAB column contains the minimum, median, 95<sup>th</sup> percentile and maximum values of the occupancy-weighted average B-factor per residue. The column labelled 'Q < 0.9' lists the number of (and percentage) of residues with an average occupancy less than 0.9.

| Mol | Chain | Analysed       | <RSRZ> | #RSRZ > 2    | OWAB(Å <sup>2</sup> ) | Q < 0.9 |
|-----|-------|----------------|--------|--------------|-----------------------|---------|
| 1   | A     | 129/129 (100%) | -0.09  | 4 (3%) 49 49 | 14, 19, 29, 49        | 2 (1%)  |

All (4) RSRZ outliers are listed below:

| Mol | Chain | Res   | Type | RSRZ |
|-----|-------|-------|------|------|
| 1   | A     | 47[A] | THR  | 3.4  |
| 1   | A     | 129   | LEU  | 3.1  |
| 1   | A     | 71    | GLY  | 2.7  |
| 1   | A     | 70    | PRO  | 2.1  |

### 6.2 Non-standard residues in protein, DNA, RNA chains [i](#)

There are no non-standard protein/DNA/RNA residues in this entry.

### 6.3 Carbohydrates [i](#)

There are no monosaccharides in this entry.

### 6.4 Ligands [i](#)

In the following table, the Atoms column lists the number of modelled atoms in the group and the number defined in the chemical component dictionary. The B-factors column lists the minimum, median, 95<sup>th</sup> percentile and maximum values of B factors of atoms in the group. The column labelled 'Q < 0.9' lists the number of atoms with occupancy less than 0.9.

| Mol | Type | Chain | Res  | Atoms | RSCC | RSR  | B-factors(Å <sup>2</sup> ) | Q < 0.9 |
|-----|------|-------|------|-------|------|------|----------------------------|---------|
| 5   | EDO  | A     | 1149 | 4/?   | 0.57 | 0.20 | 75,76,76,76                | 0       |
| 4   | 1PE  | A     | 1147 | 8/?   | 0.68 | 0.12 | 56,57,57,58                | 0       |
| 4   | 1PE  | A     | 1148 | 7/?   | 0.88 | 0.12 | 55,55,58,59                | 0       |

*Continued on next page...*

Continued from previous page...

| Mol | Type | Chain | Res  | Atoms | RSCC | RSR  | B-factors( $\text{\AA}^2$ ) | Q<0.9 |
|-----|------|-------|------|-------|------|------|-----------------------------|-------|
| 2   | CL   | A     | 1138 | 1/?   | 0.99 | 0.03 | 26,26,26,26                 | 1     |
| 3   | NA   | A     | 1146 | 1/?   | 1.00 | 0.03 | 23,23,23,23                 | 0     |
| 2   | CL   | A     | 1137 | 1/?   | 1.00 | 0.12 | 20,20,20,20                 | 1     |
| 2   | CL   | A     | 1139 | 1/?   | 1.00 | 0.02 | 25,25,25,25                 | 1     |
| 3   | NA   | A     | 1145 | 1/?   | 1.00 | 0.03 | 23,23,23,23                 | 0     |

## 6.5 Other polymers [i](#)

There are no such residues in this entry.



# Preliminary Full wwPDB X-ray Structure Validation Report ⓘ

Feb 10, 2023 – 04:35 pm GMT

Deposition ID : D\_1292128510

**This wwPDB validation report is NOT for manuscript review**

This is a Preliminary Full wwPDB X-ray Structure Validation Report.

This report is produced by the wwPDB Deposition System during initial deposition but before annotation of the structure.

We welcome your comments at [validation@mail.wwpdb.org](mailto:validation@mail.wwpdb.org)

A user guide is available at

<https://www.wwpdb.org/validation/2017/XrayValidationReportHelp>

with specific help available everywhere you see the ⓘ symbol.

The types of validation reports are described at

<http://www.wwpdb.org/validation/2017/FAQs#types>.

---

The following versions of software and data (see [references ⓘ](#)) were used in the production of this report:

|                                |   |                                                                    |
|--------------------------------|---|--------------------------------------------------------------------|
| MolProbity                     | : | 4.02b-467                                                          |
| Mogul                          | : | 1.8.4, CSD as541be (2020)                                          |
| Xtriage (Phenix)               | : | 1.13                                                               |
| EDS                            | : | 2.32.1                                                             |
| buster-report                  | : | 1.1.7 (2018)                                                       |
| Percentile statistics          | : | 20191225.v01 (using entries in the PDB archive December 25th 2019) |
| Refmac                         | : | 5.8.0158                                                           |
| CCP4                           | : | 7.0.044 (Gargrove)                                                 |
| Ideal geometry (proteins)      | : | Engh & Huber (2001)                                                |
| Ideal geometry (DNA, RNA)      | : | Parkinson et al. (1996)                                            |
| Validation Pipeline (wwPDB-VP) | : | 2.32.1                                                             |

# 1 Overall quality at a glance i

The following experimental techniques were used to determine the structure:

*X-RAY DIFFRACTION*

The reported resolution of this entry is 2.40 Å.

Percentile scores (ranging between 0-100) for global validation metrics of the entry are shown in the following graphic. The table shows the number of entries on which the scores are based.

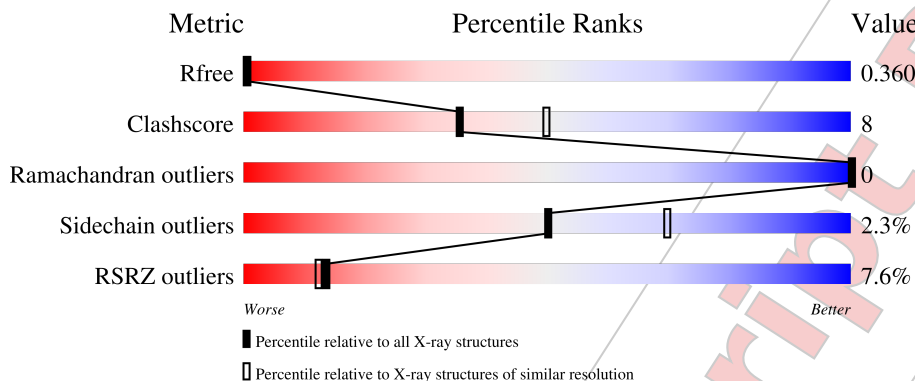

| Metric                | Whole archive<br>(#Entries) | Similar resolution<br>(#Entries, resolution range(Å)) |
|-----------------------|-----------------------------|-------------------------------------------------------|
| $R_{free}$            | 130704                      | 3907 (2.40-2.40)                                      |
| Clashscore            | 141614                      | 4398 (2.40-2.40)                                      |
| Ramachandran outliers | 138981                      | 4318 (2.40-2.40)                                      |
| Sidechain outliers    | 138945                      | 4319 (2.40-2.40)                                      |
| RSRZ outliers         | 127900                      | 3811 (2.40-2.40)                                      |

The table below summarises the geometric issues observed across the polymeric chains and their fit to the electron density. The red, orange, yellow and green segments of the lower bar indicate the fraction of residues that contain outliers for  $\geq 3$ , 2, 1 and 0 types of geometric quality criteria respectively. A grey segment represents the fraction of residues that are not modelled. The numeric value for each fraction is indicated below the corresponding segment, with a dot representing fractions  $\leq 5\%$ . The upper red bar (where present) indicates the fraction of residues that have poor fit to the electron density. The numeric value is given above the bar.

| Mol | Chain | Length | Quality of chain |
|-----|-------|--------|------------------|
| 1   | A     | 265    |                  |

The following table lists non-polymeric compounds, carbohydrate monomers and non-standard residues in protein, DNA, RNA chains that are outliers for geometric or electron-density-fit criteria:

| Mol | Type | Chain | Res | Chirality | Geometry | Clashes | Electron density |
|-----|------|-------|-----|-----------|----------|---------|------------------|
| 2   | LFA  | A     | 403 | -         | -        | -       | X                |
| 2   | LFA  | A     | 410 | -         | -        | -       | X                |
| 2   | LFA  | A     | 411 | -         | -        | -       | X                |
| 2   | LFA  | A     | 412 | -         | -        | -       | X                |
| 2   | LFA  | A     | 414 | -         | -        | -       | X                |
| 2   | LFA  | A     | 415 | -         | -        | -       | X                |
| 2   | LFA  | A     | 416 | -         | -        | -       | X                |
| 2   | LFA  | A     | 417 | -         | -        | -       | X                |
| 2   | LFA  | A     | 419 | -         | -        | -       | X                |
| 2   | LFA  | A     | 422 | -         | -        | -       | X                |
| 2   | LFA  | A     | 423 | -         | -        | -       | X                |
| 2   | LFA  | A     | 425 | -         | -        | -       | X                |
| 2   | LFA  | A     | 427 | -         | -        | -       | X                |

Not For Manuscript Review

## 2 Entry composition [i](#)

There are 3 unique types of molecules in this entry. The entry contains 2448 atoms, of which 55 are hydrogens and 0 are deuteriums.

In the tables below, the ZeroOcc column contains the number of atoms modelled with zero occupancy, the AltConf column contains the number of residues with at least one atom in alternate conformation and the Trace column contains the number of residues modelled with at most 2 atoms.

- Molecule 1 is a protein called Krokinobacter eikastus rhodopsin 2 (KR2).

| Mol | Chain | Residues | Atoms |      |    |     |     | ZeroOcc | AltConf | Trace |   |
|-----|-------|----------|-------|------|----|-----|-----|---------|---------|-------|---|
|     |       |          | Total | C    | H  | N   | O   |         |         |       | S |
| 1   | A     | 265      | 2143  | 1419 | 28 | 318 | 369 | 9       | 0       | 3     | 0 |

- Molecule 2 is EICOSANE (three-letter code: LFA) (formula:  $C_{20}H_{42}$ ).

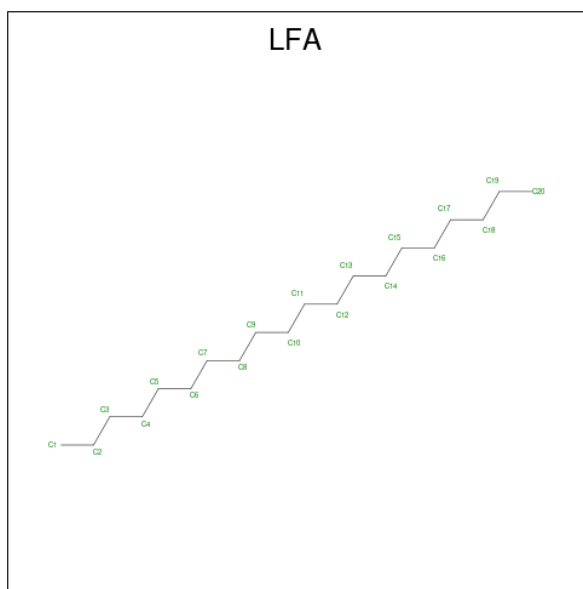

| Mol | Chain | Residues | Atoms |    | ZeroOcc | AltConf |
|-----|-------|----------|-------|----|---------|---------|
| 2   | A     | 1        | Total | C  | 0       | 0       |
|     |       |          | 16    | 16 |         |         |
| 2   | A     | 1        | Total | C  | 0       | 0       |
|     |       |          | 8     | 8  |         |         |
| 2   | A     | 1        | Total | C  | 0       | 0       |
|     |       |          | 6     | 6  |         |         |
| 2   | A     | 1        | Total | C  | 0       | 0       |
|     |       |          | 6     | 6  |         |         |
| 2   | A     | 1        | Total | C  | 0       | 0       |
|     |       |          | 13    | 13 |         |         |

*Continued on next page...*

Continued from previous page...

| Mol | Chain | Residues | Atoms                 | ZeroOcc | AltConf |
|-----|-------|----------|-----------------------|---------|---------|
| 2   | A     | 1        | Total C<br>10 10      | 0       | 0       |
| 2   | A     | 1        | Total C<br>8 8        | 0       | 0       |
| 2   | A     | 1        | Total C<br>12 12      | 0       | 0       |
| 2   | A     | 1        | Total C<br>11 11      | 0       | 0       |
| 2   | A     | 1        | Total C<br>5 5        | 0       | 0       |
| 2   | A     | 1        | Total C<br>10 10      | 0       | 0       |
| 2   | A     | 1        | Total C<br>5 5        | 0       | 0       |
| 2   | A     | 1        | Total C<br>10 10      | 0       | 0       |
| 2   | A     | 1        | Total C<br>9 9        | 0       | 0       |
| 2   | A     | 1        | Total C<br>9 9        | 0       | 0       |
| 2   | A     | 1        | Total C<br>6 6        | 0       | 0       |
| 2   | A     | 1        | Total C<br>5 5        | 0       | 0       |
| 2   | A     | 1        | Total C<br>4 4        | 0       | 0       |
| 2   | A     | 1        | Total C<br>6 6        | 0       | 0       |
| 2   | A     | 1        | Total C<br>10 10      | 0       | 0       |
| 2   | A     | 1        | Total C<br>3 3        | 0       | 0       |
| 2   | A     | 1        | Total C<br>9 9        | 0       | 0       |
| 2   | A     | 1        | Total C<br>10 10      | 0       | 0       |
| 2   | A     | 1        | Total C<br>12 12      | 0       | 0       |
| 2   | A     | 1        | Total C H<br>40 13 27 | 0       | 0       |

- Molecule 3 is water.

| Mol | Chain | Residues | Atoms | ZeroOcc | AltConf |
|-----|-------|----------|-------|---------|---------|
| 3   | S     | 62       | Total | O       | 0       |
|     |       |          | 62    | 62      |         |

Not For Manuscript Review

### 3 Residue-property plots [i](#)

These plots are drawn for all protein, RNA, DNA and oligosaccharide chains in the entry. The first graphic for a chain summarises the proportions of the various outlier classes displayed in the second graphic. The second graphic shows the sequence view annotated by issues in geometry and electron density. Residues are color-coded according to the number of geometric quality criteria for which they contain at least one outlier: green = 0, yellow = 1, orange = 2 and red = 3 or more. A red dot above a residue indicates a poor fit to the electron density ( $RSRZ > 2$ ). Stretches of 2 or more consecutive residues without any outlier are shown as a green connector. Residues present in the sample, but not in the model, are shown in grey.

- Molecule 1: *Krokinobacter eikastus* rhodopsin 2 (KR2)

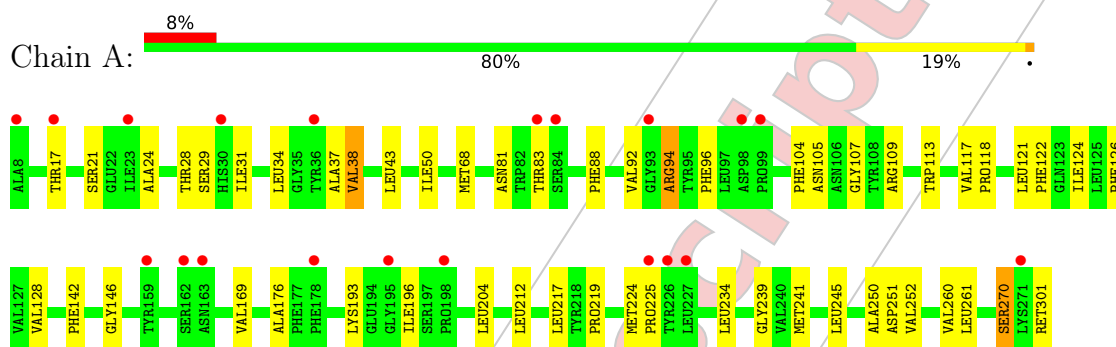

## 4 Data and refinement statistics i

| Property                                                                | Value                                                       | Source           |
|-------------------------------------------------------------------------|-------------------------------------------------------------|------------------|
| Space group                                                             | I 2 2 2                                                     | Depositor        |
| Cell constants<br>a, b, c, $\alpha$ , $\beta$ , $\gamma$                | 41.46Å 84.89Å 234.95Å<br>90.00° 90.00° 90.00°               | Depositor        |
| Resolution (Å)                                                          | 14.83 – 2.40<br>14.83 – 2.40                                | Depositor<br>EDS |
| % Data completeness<br>(in resolution range)                            | 94.0 (14.83-2.40)<br>94.0 (14.83-2.40)                      | Depositor<br>EDS |
| $R_{merge}$                                                             | (Not available)                                             | Depositor        |
| $R_{sym}$                                                               | (Not available)                                             | Depositor        |
| $\langle I/\sigma(I) \rangle$ <sup>1</sup>                              | 0.88 (at 2.39Å)                                             | Xtrriage         |
| Refinement program                                                      | PHENIX 1.20_4459                                            | Depositor        |
| R, $R_{free}$                                                           | 0.327 , 0.358<br>0.327 , 0.360                              | Depositor<br>DCC |
| $R_{free}$ test set                                                     | 780 reflections (4.96%)                                     | wwPDB-VP         |
| Wilson B-factor (Å <sup>2</sup> )                                       | 28.9                                                        | Xtrriage         |
| Anisotropy                                                              | 0.136                                                       | Xtrriage         |
| Bulk solvent $k_{sol}$ (e/Å <sup>3</sup> ), $B_{sol}$ (Å <sup>2</sup> ) | 0.33 , 93.6                                                 | EDS              |
| L-test for twinning <sup>2</sup>                                        | $\langle  L  \rangle = 0.54$ , $\langle L^2 \rangle = 0.39$ | Xtrriage         |
| Estimated twinning fraction                                             | No twinning to report.                                      | Xtrriage         |
| $F_o, F_c$ correlation                                                  | 0.85                                                        | EDS              |
| Total number of atoms                                                   | 2448                                                        | wwPDB-VP         |
| Average B, all atoms (Å <sup>2</sup> )                                  | 39.0                                                        | wwPDB-VP         |

Xtrriage's analysis on translational NCS is as follows: *The largest off-origin peak in the Patterson function is 8.37% of the height of the origin peak. No significant pseudotranslation is detected.*

<sup>1</sup>Intensities estimated from amplitudes.

<sup>2</sup>Theoretical values of  $\langle |L| \rangle$ ,  $\langle L^2 \rangle$  for acentric reflections are 0.5, 0.333 respectively for untwinned datasets, and 0.375, 0.2 for perfectly twinned datasets.

## 5 Model quality [i](#)

### 5.1 Standard geometry [i](#)

Bond lengths and bond angles in the following residue types are not validated in this section: RET, LFA

The Z score for a bond length (or angle) is the number of standard deviations the observed value is removed from the expected value. A bond length (or angle) with  $|Z| > 5$  is considered an outlier worth inspection. RMSZ is the root-mean-square of all Z scores of the bond lengths (or angles).

| Mol | Chain | Bond lengths |               | Bond angles |         |
|-----|-------|--------------|---------------|-------------|---------|
|     |       | RMSZ         | # Z  >5       | RMSZ        | # Z  >5 |
| 1   | A     | 0.40         | 1/2159 (0.0%) | 0.52        | 0/2940  |

Chiral center outliers are detected by calculating the chiral volume of a chiral center and verifying if the center is modelled as a planar moiety or with the opposite hand. A planarity outlier is detected by checking planarity of atoms in a peptide group, atoms in a mainchain group or atoms of a sidechain that are expected to be planar.

| Mol | Chain | #Chirality outliers | #Planarity outliers |
|-----|-------|---------------------|---------------------|
| 1   | A     | 0                   | 1                   |

All (1) bond length outliers are listed below:

| Mol | Chain | Res | Type | Atoms | Z     | Observed(Å) | Ideal(Å) |
|-----|-------|-----|------|-------|-------|-------------|----------|
| 1   | A     | 270 | SER  | CA-CB | -5.59 | 1.44        | 1.52     |

There are no bond angle outliers.

There are no chirality outliers.

All (1) planarity outliers are listed below:

| Mol | Chain | Res | Type | Group     |
|-----|-------|-----|------|-----------|
| 1   | A     | 94  | ARG  | Sidechain |

### 5.2 Too-close contacts [i](#)

In the following table, the Non-H and H(model) columns list the number of non-hydrogen atoms and hydrogen atoms in the chain respectively. The H(added) column lists the number of hydrogen atoms added and optimized by MolProbity. The Clashes column lists the number of clashes within the asymmetric unit, whereas Symm-Clashes lists symmetry-related clashes.

| Mol | Chain | Non-H | H(model) | H(added) | Clashes | Symm-Clashes |
|-----|-------|-------|----------|----------|---------|--------------|
| 1   | A     | 2115  | 28       | 2092     | 36      | 1            |
| 2   | A     | 216   | 27       | 389      | 13      | 1            |
| 3   | S     | 62    | 0        | 0        | 0       | 0            |
| All | All   | 2393  | 55       | 2481     | 39      | 1            |

The all-atom clashscore is defined as the number of clashes found per 1000 atoms (including hydrogen atoms). The all-atom clashscore for this structure is 8.

All (39) close contacts within the same asymmetric unit are listed below, sorted by their clash magnitude.

| Atom-1           | Atom-2           | Interatomic distance (Å) | Clash overlap (Å) |
|------------------|------------------|--------------------------|-------------------|
| 2:A:407:LFA:H13  | 2:A:407:LFA:H51  | 1.71                     | 0.72              |
| 1:A:34:LEU:O     | 1:A:38:VAL:HG13  | 1.93                     | 0.67              |
| 2:A:423:LFA:H42  | 2:A:423:LFA:H82  | 1.83                     | 0.60              |
| 1:A:301:RET:H161 | 1:A:301:RET:C8   | 2.34                     | 0.57              |
| 1:A:301:RET:H161 | 1:A:301:RET:H8   | 1.86                     | 0.56              |
| 1:A:81:ASN:HD21  | 1:A:105:ASN:H    | 1.58                     | 0.52              |
| 1:A:81:ASN:ND2   | 1:A:105:ASN:H    | 2.07                     | 0.52              |
| 1:A:117:VAL:N    | 1:A:118:PRO:HD2  | 2.24                     | 0.52              |
| 1:A:212:LEU:HD22 | 2:A:425:LFA:H31  | 1.91                     | 0.52              |
| 1:A:21:SER:HB3   | 1:A:94:ARG:NH2   | 2.27                     | 0.50              |
| 1:A:252:VAL:HG11 | 2:A:405:LFA:H51  | 1.94                     | 0.48              |
| 1:A:17:THR:HG22  | 2:A:428:LFA:H171 | 1.95                     | 0.47              |
| 1:A:24:ALA:HA    | 1:A:241:MET:SD   | 2.55                     | 0.46              |
| 1:A:126:PHE:HE1  | 2:A:418:LFA:H51  | 1.80                     | 0.46              |
| 1:A:81:ASN:HD21  | 1:A:104:PHE:HA   | 1.81                     | 0.46              |
| 1:A:117:VAL:HG11 | 1:A:146:GLY:HA3  | 1.98                     | 0.46              |
| 1:A:113:TRP:O    | 1:A:117:VAL:HG23 | 2.15                     | 0.45              |
| 1:A:128:VAL:HG11 | 1:A:204:LEU:HD21 | 1.98                     | 0.45              |
| 1:A:92:VAL:HG11  | 1:A:96:PHE:HZ    | 1.82                     | 0.45              |
| 1:A:118:PRO:O    | 1:A:122:PHE:HB2  | 2.17                     | 0.45              |
| 1:A:217:LEU:HB2  | 1:A:250:ALA:HB2  | 1.98                     | 0.45              |
| 1:A:261:LEU:HD21 | 2:A:423:LFA:H62  | 1.99                     | 0.45              |
| 1:A:224:MET:N    | 1:A:225:PRO:HD2  | 2.32                     | 0.44              |
| 1:A:37:ALA:HB1   | 2:A:415:LFA:H51  | 1.99                     | 0.44              |
| 1:A:107:GLY:HA3  | 2:A:407:LFA:H81  | 2.00                     | 0.44              |
| 1:A:301:RET:H7   | 1:A:301:RET:H181 | 1.87                     | 0.44              |
| 1:A:234:LEU:O    | 1:A:239:GLY:HA3  | 2.19                     | 0.43              |
| 1:A:31:ILE:HG12  | 1:A:245:LEU:HD23 | 2.01                     | 0.42              |
| 1:A:121:LEU:O    | 1:A:124:ILE:HG22 | 2.19                     | 0.41              |
| 1:A:260:VAL:HG21 | 2:A:402:LFA:H51  | 2.03                     | 0.41              |
| 1:A:29:SER:HB3   | 1:A:83:THR:HG22  | 2.02                     | 0.41              |

Continued on next page...

Continued from previous page...

| Atom-1           | Atom-2           | Interatomic distance (Å) | Clash overlap (Å) |
|------------------|------------------|--------------------------|-------------------|
| 1:A:109:ARG:NH1  | 1:A:251:ASP:OD2  | 2.54                     | 0.41              |
| 1:A:28:THR:O     | 1:A:31:ILE:HG22  | 2.21                     | 0.41              |
| 1:A:193:LYS:O    | 1:A:196:ILE:HG12 | 2.21                     | 0.41              |
| 1:A:219:PRO:HB3  | 1:A:301:RET:H183 | 2.02                     | 0.41              |
| 1:A:176:ALA:HB1  | 2:A:419:LFA:H52  | 2.03                     | 0.40              |
| 2:A:423:LFA:H42  | 2:A:423:LFA:C8   | 2.51                     | 0.40              |
| 1:A:43:LEU:N     | 1:A:68:MET:HG3   | 2.36                     | 0.40              |
| 1:A:169:VAL:HG11 | 2:A:404:LFA:H31  | 2.03                     | 0.40              |

All (1) symmetry-related close contacts are listed below. The label for Atom-2 includes the symmetry operator and encoded unit-cell translations to be applied.

| Atom-1         | Atom-2                  | Interatomic distance (Å) | Clash overlap (Å) |
|----------------|-------------------------|--------------------------|-------------------|
| 1:A:17:THR:CG2 | 2:A:428:LFA:H131[3_857] | 1.41                     | 0.19              |

### 5.3 Torsion angles [i](#)

#### 5.3.1 Protein backbone [i](#)

In the following table, the Percentiles column shows the percent Ramachandran outliers of the chain as a percentile score with respect to all X-ray entries followed by that with respect to entries of similar resolution.

The Analysed column shows the number of residues for which the backbone conformation was analysed, and the total number of residues.

| Mol | Chain | Analysed       | Favoured  | Allowed | Outliers | Percentiles           |
|-----|-------|----------------|-----------|---------|----------|-----------------------|
| 1   | A     | 265/265 (100%) | 256 (97%) | 9 (3%)  | 0        | <b>100</b> <b>100</b> |

There are no Ramachandran outliers to report.

#### 5.3.2 Protein sidechains [i](#)

In the following table, the Percentiles column shows the percent sidechain outliers of the chain as a percentile score with respect to all X-ray entries followed by that with respect to entries of similar resolution.

The Analysed column shows the number of residues for which the sidechain conformation was analysed, and the total number of residues.

| Mol | Chain | Analysed      | Rotameric | Outliers | Percentiles |
|-----|-------|---------------|-----------|----------|-------------|
| 1   | A     | 221/226 (98%) | 216 (98%) | 5 (2%)   | 50 70       |

All (5) residues with a non-rotameric sidechain are listed below:

| Mol | Chain | Res | Type |
|-----|-------|-----|------|
| 1   | A     | 38  | VAL  |
| 1   | A     | 50  | ILE  |
| 1   | A     | 88  | PHE  |
| 1   | A     | 142 | PHE  |
| 1   | A     | 270 | SER  |

Sometimes sidechains can be flipped to improve hydrogen bonding and reduce clashes. All (1) such sidechains are listed below:

| Mol | Chain | Res | Type |
|-----|-------|-----|------|
| 1   | A     | 81  | ASN  |

### 5.3.3 RNA [i](#)

There are no RNA molecules in this entry.

### 5.4 Non-standard residues in protein, DNA, RNA chains [i](#)

There are no non-standard protein/DNA/RNA residues in this entry.

### 5.5 Carbohydrates [i](#)

There are no monosaccharides in this entry.

### 5.6 Ligand geometry [i](#)

25 ligands are modelled in this entry.

In the following table, the Counts columns list the number of bonds (or angles) for which Mogul statistics could be retrieved, the number of bonds (or angles) that are observed in the model and the number of bonds (or angles) that are defined in the Chemical Component Dictionary. The Link column lists molecule types, if any, to which the group is linked. The Z score for a bond length (or angle) is the number of standard deviations the observed value is removed from the expected value. A bond length (or angle) with  $|Z| > 2$  is considered an outlier worth inspection. RMSZ is the root-mean-square of all Z scores of the bond lengths (or angles).

| Mol | Type | Chain | Res | Link | Bond lengths |      |          | Bond angles |      |          |
|-----|------|-------|-----|------|--------------|------|----------|-------------|------|----------|
|     |      |       |     |      | Counts       | RMSZ | # Z  > 2 | Counts      | RMSZ | # Z  > 2 |
| 2   | LFA  | A     | 425 | -    | 8,8,19       | 0.32 | 0        | 7,7,18      | 0.73 | 0        |
| 2   | LFA  | A     | 426 | -    | 9,9,19       | 0.30 | 0        | 8,8,18      | 0.79 | 0        |
| 2   | LFA  | A     | 415 | -    | 4,4,19       | 0.33 | 0        | 3,3,18      | 0.54 | 0        |
| 2   | LFA  | A     | 405 | -    | 5,5,19       | 0.32 | 0        | 4,4,18      | 0.57 | 0        |
| 2   | LFA  | A     | 421 | -    | 3,3,19       | 0.41 | 0        | 2,2,18      | 0.74 | 0        |
| 2   | LFA  | A     | 413 | -    | 4,4,19       | 0.33 | 0        | 3,3,18      | 0.53 | 0        |
| 2   | LFA  | A     | 411 | -    | 11,11,19     | 0.30 | 0        | 10,10,18    | 0.83 | 0        |
| 2   | LFA  | A     | 414 | -    | 9,9,19       | 0.31 | 0        | 8,8,18      | 0.78 | 0        |
| 2   | LFA  | A     | 427 | -    | 11,11,19     | 0.30 | 0        | 10,10,18    | 0.83 | 0        |
| 2   | LFA  | A     | 402 | -    | 15,15,19     | 0.30 | 0        | 14,14,18    | 0.87 | 0        |
| 2   | LFA  | A     | 422 | -    | 5,5,19       | 0.32 | 0        | 4,4,18      | 0.54 | 0        |
| 2   | LFA  | A     | 408 | -    | 9,9,19       | 0.30 | 0        | 8,8,18      | 0.81 | 0        |
| 2   | LFA  | A     | 404 | -    | 5,5,19       | 0.31 | 0        | 4,4,18      | 0.57 | 0        |
| 2   | LFA  | A     | 403 | -    | 7,7,19       | 0.30 | 0        | 6,6,18      | 0.74 | 0        |
| 2   | LFA  | A     | 410 | -    | 7,7,19       | 0.32 | 0        | 6,6,18      | 0.68 | 0        |
| 2   | LFA  | A     | 412 | -    | 10,10,19     | 0.30 | 0        | 9,9,18      | 0.81 | 0        |
| 2   | LFA  | A     | 419 | -    | 5,5,19       | 0.32 | 0        | 4,4,18      | 0.57 | 0        |
| 2   | LFA  | A     | 418 | -    | 8,8,19       | 0.31 | 0        | 7,7,18      | 0.74 | 0        |
| 2   | LFA  | A     | 416 | -    | 9,9,19       | 0.30 | 0        | 8,8,18      | 0.78 | 0        |
| 2   | LFA  | A     | 407 | -    | 12,12,19     | 0.31 | 0        | 11,11,18    | 0.81 | 0        |
| 2   | LFA  | A     | 428 | -    | 12,12,19     | 0.30 | 0        | 11,11,18    | 0.91 | 0        |
| 2   | LFA  | A     | 424 | -    | 2,2,19       | 0.34 | 0        | 0,1,18      | -    | -        |
| 2   | LFA  | A     | 423 | -    | 9,9,19       | 0.32 | 0        | 8,8,18      | 0.75 | 0        |
| 2   | LFA  | A     | 417 | -    | 8,8,19       | 0.31 | 0        | 7,7,18      | 0.74 | 0        |
| 2   | LFA  | A     | 420 | -    | 4,4,19       | 0.32 | 0        | 3,3,18      | 0.56 | 0        |

In the following table, the Chirals column lists the number of chiral outliers, the number of chiral centers analysed, the number of these observed in the model and the number defined in the Chemical Component Dictionary. Similar counts are reported in the Torsion and Rings columns. '-' means no outliers of that kind were identified.

| Mol | Type | Chain | Res | Link | Chirals | Torsions   | Rings |
|-----|------|-------|-----|------|---------|------------|-------|
| 2   | LFA  | A     | 425 | -    | -       | 0/6/6/17   | -     |
| 2   | LFA  | A     | 426 | -    | -       | 2/7/7/17   | -     |
| 2   | LFA  | A     | 415 | -    | -       | 0/2/2/17   | -     |
| 2   | LFA  | A     | 405 | -    | -       | 0/3/3/17   | -     |
| 2   | LFA  | A     | 421 | -    | -       | 1/1/1/17   | -     |
| 2   | LFA  | A     | 413 | -    | -       | 0/2/2/17   | -     |
| 2   | LFA  | A     | 411 | -    | -       | 1/9/9/17   | -     |
| 2   | LFA  | A     | 414 | -    | -       | 0/7/7/17   | -     |
| 2   | LFA  | A     | 427 | -    | -       | 0/9/9/17   | -     |
| 2   | LFA  | A     | 402 | -    | -       | 1/13/13/17 | -     |

Continued on next page...

Continued from previous page...

| Mol | Type | Chain | Res | Link | Chirals | Torsions   | Rings |
|-----|------|-------|-----|------|---------|------------|-------|
| 2   | LFA  | A     | 422 | -    | -       | 0/3/3/17   | -     |
| 2   | LFA  | A     | 408 | -    | -       | 0/7/7/17   | -     |
| 2   | LFA  | A     | 404 | -    | -       | 0/3/3/17   | -     |
| 2   | LFA  | A     | 403 | -    | -       | 0/5/5/17   | -     |
| 2   | LFA  | A     | 410 | -    | -       | 1/5/5/17   | -     |
| 2   | LFA  | A     | 412 | -    | -       | 1/8/8/17   | -     |
| 2   | LFA  | A     | 419 | -    | -       | 0/3/3/17   | -     |
| 2   | LFA  | A     | 418 | -    | -       | 3/6/6/17   | -     |
| 2   | LFA  | A     | 416 | -    | -       | 1/7/7/17   | -     |
| 2   | LFA  | A     | 407 | -    | -       | 3/10/10/17 | -     |
| 2   | LFA  | A     | 428 | -    | -       | 7/10/10/17 | -     |
| 2   | LFA  | A     | 423 | -    | -       | 2/7/7/17   | -     |
| 2   | LFA  | A     | 417 | -    | -       | 1/6/6/17   | -     |
| 2   | LFA  | A     | 420 | -    | -       | 0/2/2/17   | -     |

There are no bond length outliers.

There are no bond angle outliers.

There are no chirality outliers.

All (24) torsion outliers are listed below:

| Mol | Chain | Res | Type | Atoms           |
|-----|-------|-----|------|-----------------|
| 2   | A     | 421 | LFA  | C3-C4-C5-C6     |
| 2   | A     | 428 | LFA  | C12-C13-C14-C15 |
| 2   | A     | 428 | LFA  | C14-C15-C16-C17 |
| 2   | A     | 417 | LFA  | C6-C7-C8-C9     |
| 2   | A     | 407 | LFA  | C9-C10-C11-C12  |
| 2   | A     | 418 | LFA  | C3-C4-C5-C6     |
| 2   | A     | 423 | LFA  | C5-C6-C7-C8     |
| 2   | A     | 423 | LFA  | C3-C4-C5-C6     |
| 2   | A     | 407 | LFA  | C4-C5-C6-C7     |
| 2   | A     | 428 | LFA  | C11-C12-C13-C14 |
| 2   | A     | 428 | LFA  | C17-C18-C19-C20 |
| 2   | A     | 428 | LFA  | C11-C10-C9-C8   |
| 2   | A     | 407 | LFA  | C1-C2-C3-C4     |
| 2   | A     | 402 | LFA  | C11-C12-C13-C14 |
| 2   | A     | 428 | LFA  | C10-C11-C12-C13 |
| 2   | A     | 418 | LFA  | C1-C2-C3-C4     |
| 2   | A     | 426 | LFA  | C6-C7-C8-C9     |
| 2   | A     | 416 | LFA  | C5-C6-C7-C8     |
| 2   | A     | 410 | LFA  | C3-C4-C5-C6     |

Continued on next page...

Continued from previous page...

| Mol | Chain | Res | Type | Atoms          |
|-----|-------|-----|------|----------------|
| 2   | A     | 418 | LFA  | C4-C5-C6-C7    |
| 2   | A     | 411 | LFA  | C6-C7-C8-C9    |
| 2   | A     | 428 | LFA  | C9-C10-C11-C12 |
| 2   | A     | 426 | LFA  | C3-C4-C5-C6    |
| 2   | A     | 412 | LFA  | C11-C10-C9-C8  |

There are no ring outliers.

10 monomers are involved in 14 short contacts:

| Mol | Chain | Res | Type | Clashes | Symm-Clashes |
|-----|-------|-----|------|---------|--------------|
| 2   | A     | 425 | LFA  | 1       | 0            |
| 2   | A     | 415 | LFA  | 1       | 0            |
| 2   | A     | 405 | LFA  | 1       | 0            |
| 2   | A     | 402 | LFA  | 1       | 0            |
| 2   | A     | 404 | LFA  | 1       | 0            |
| 2   | A     | 419 | LFA  | 1       | 0            |
| 2   | A     | 418 | LFA  | 1       | 0            |
| 2   | A     | 407 | LFA  | 2       | 0            |
| 2   | A     | 428 | LFA  | 1       | 1            |
| 2   | A     | 423 | LFA  | 3       | 0            |

The following is a two-dimensional graphical depiction of Mogul quality analysis of bond lengths, bond angles, torsion angles, and ring geometry for all instances of the Ligand of Interest. In addition, ligands with molecular weight > 250 and outliers as shown on the validation Tables will also be included. For torsion angles, if less than 5% of the Mogul distribution of torsion angles is within 10 degrees of the torsion angle in question, then that torsion angle is considered an outlier. Any bond that is central to one or more torsion angles identified as an outlier by Mogul will be highlighted in the graph. For rings, the root-mean-square deviation (RMSD) between the ring in question and similar rings identified by Mogul is calculated over all ring torsion angles. If the average RMSD is greater than 60 degrees and the minimal RMSD between the ring in question and any Mogul-identified rings is also greater than 60 degrees, then that ring is considered an outlier. The outliers are highlighted in purple. The color gray indicates Mogul did not find sufficient equivalents in the CSD to analyse the geometry.

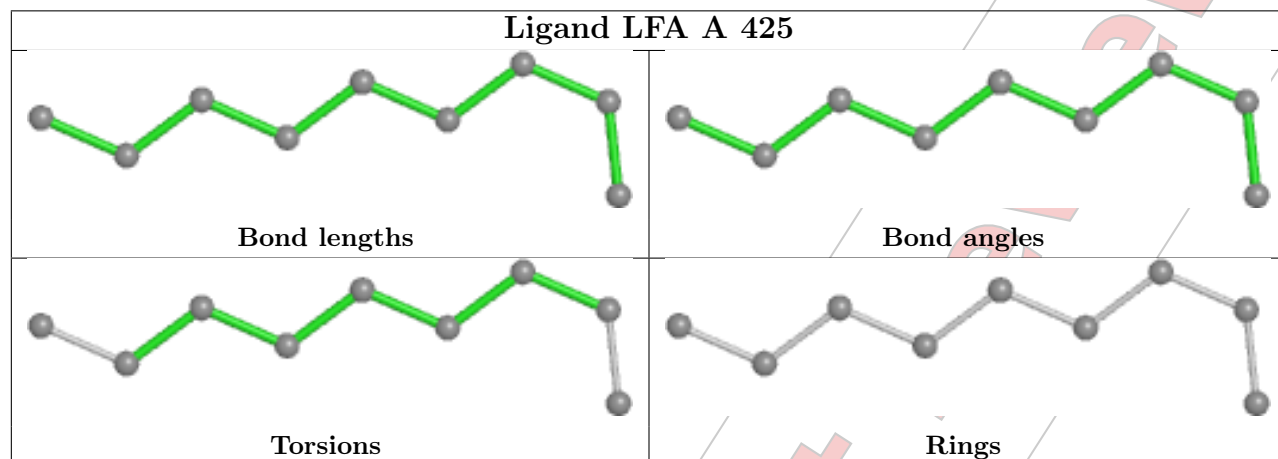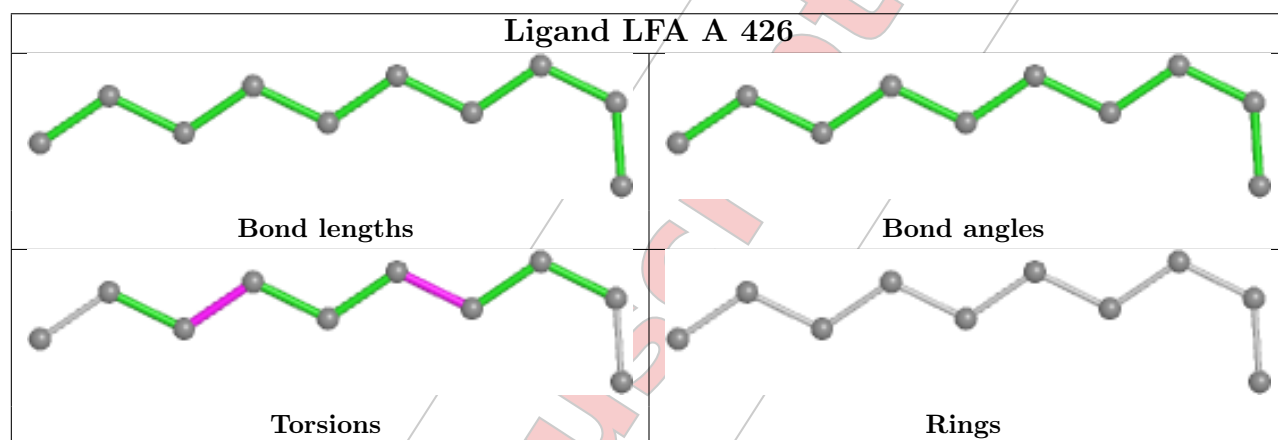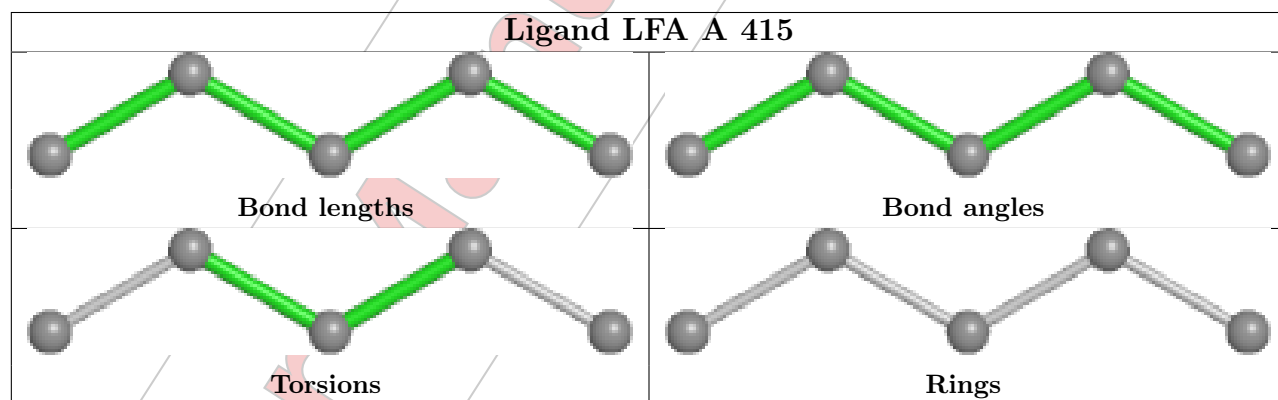

Not For Manuscript Review

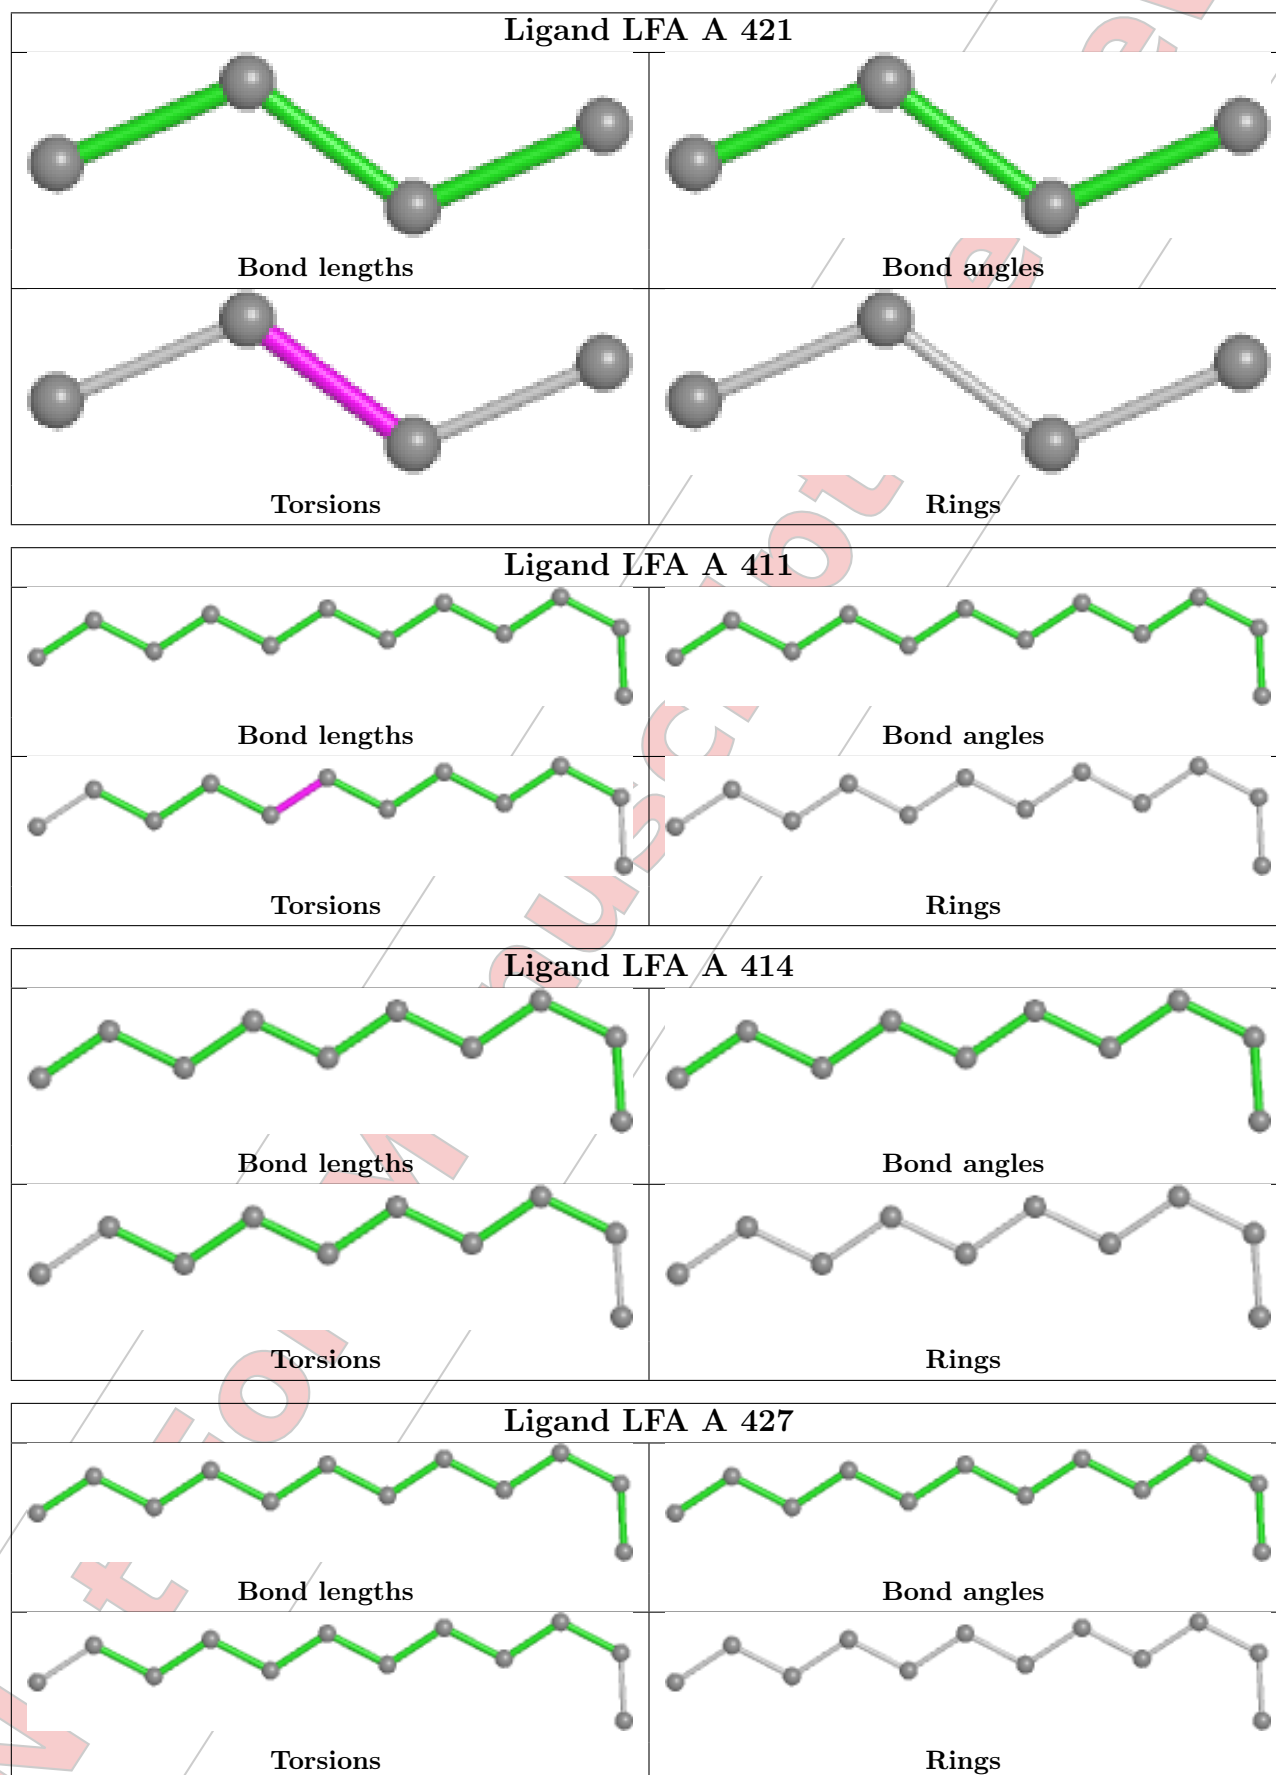

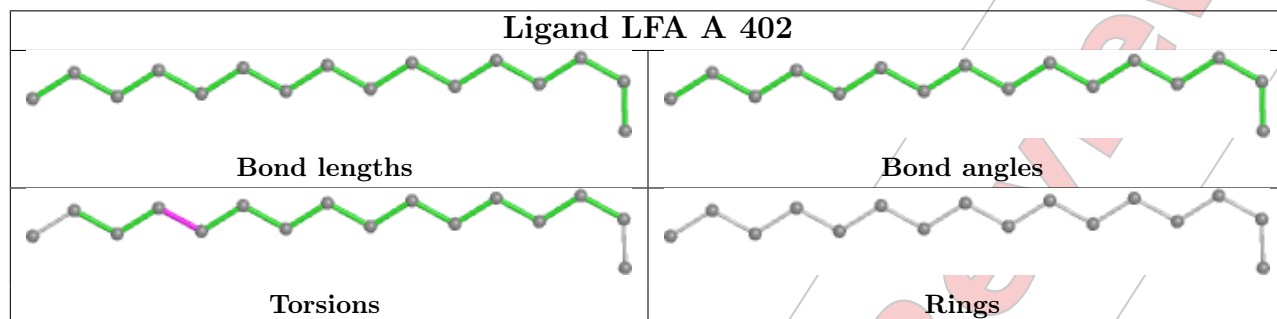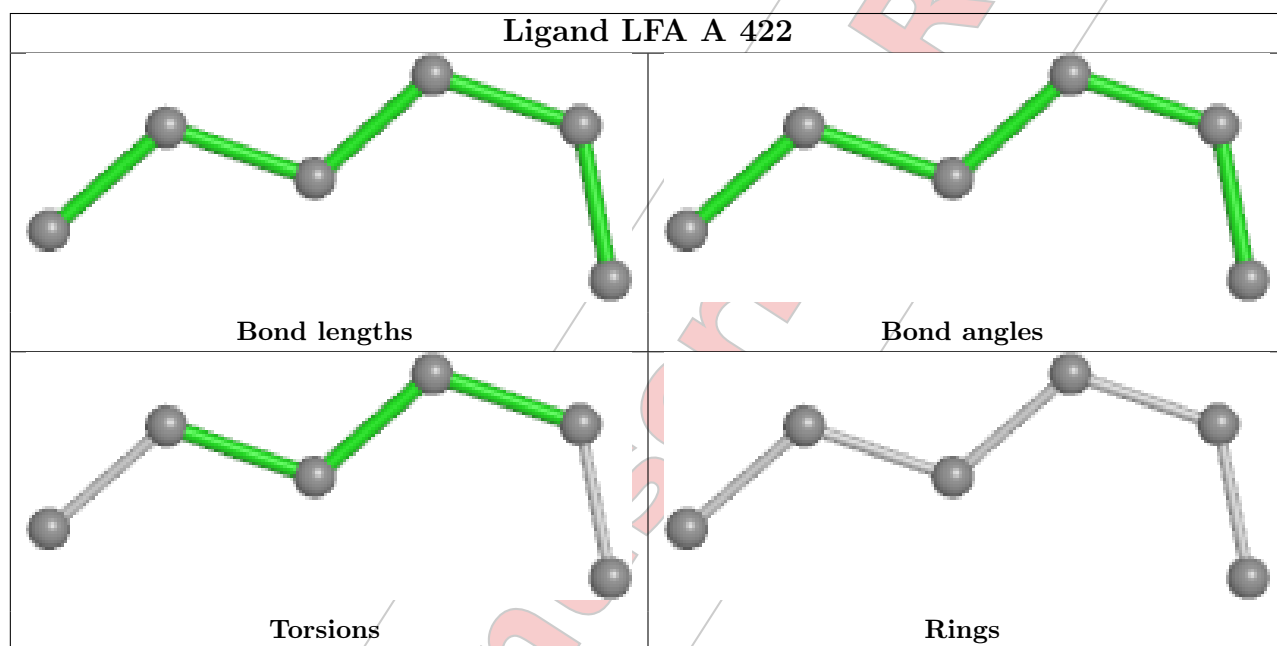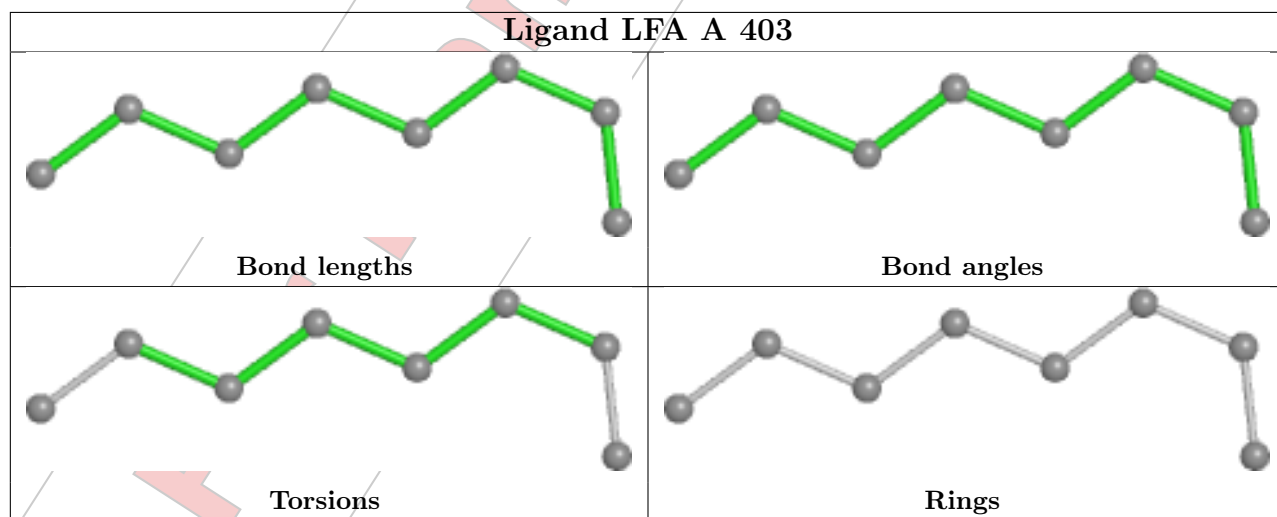

Not

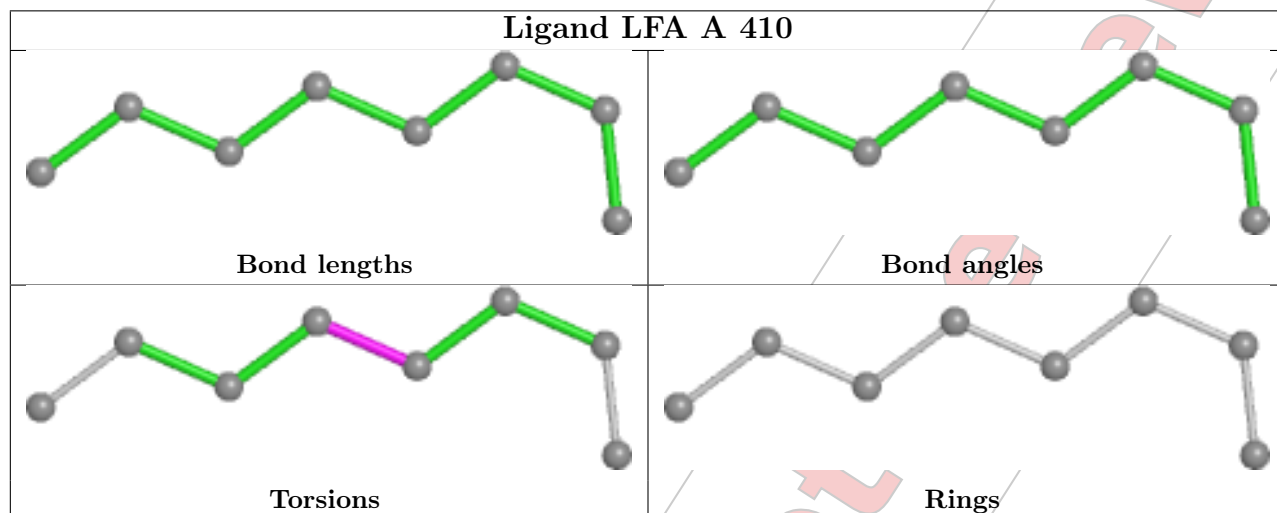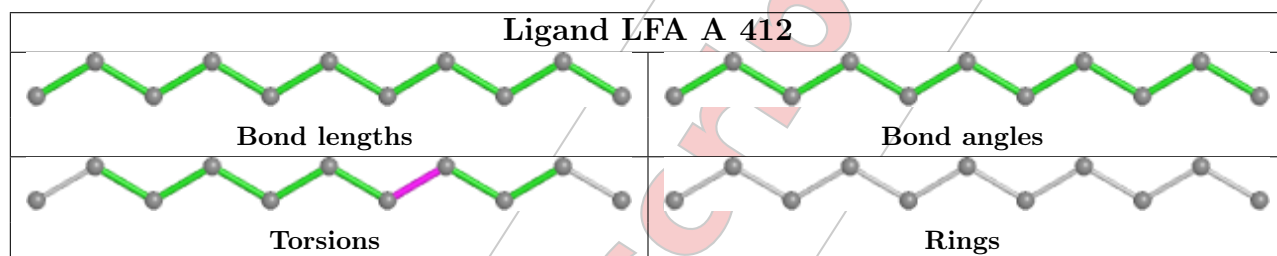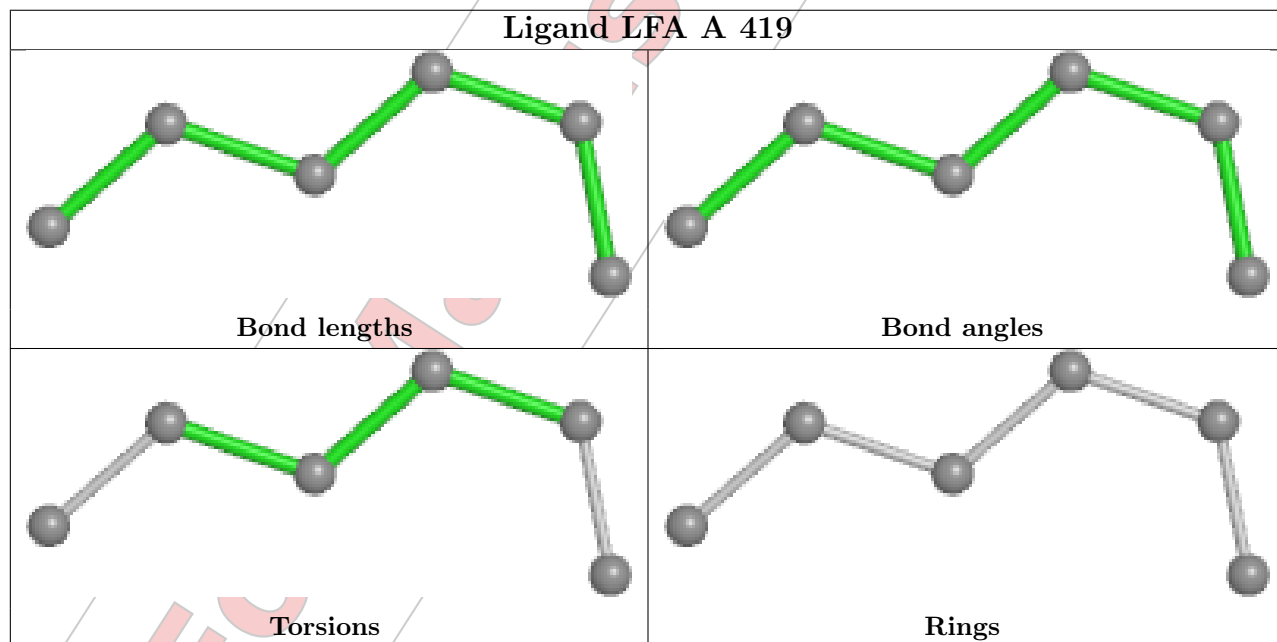

Not For

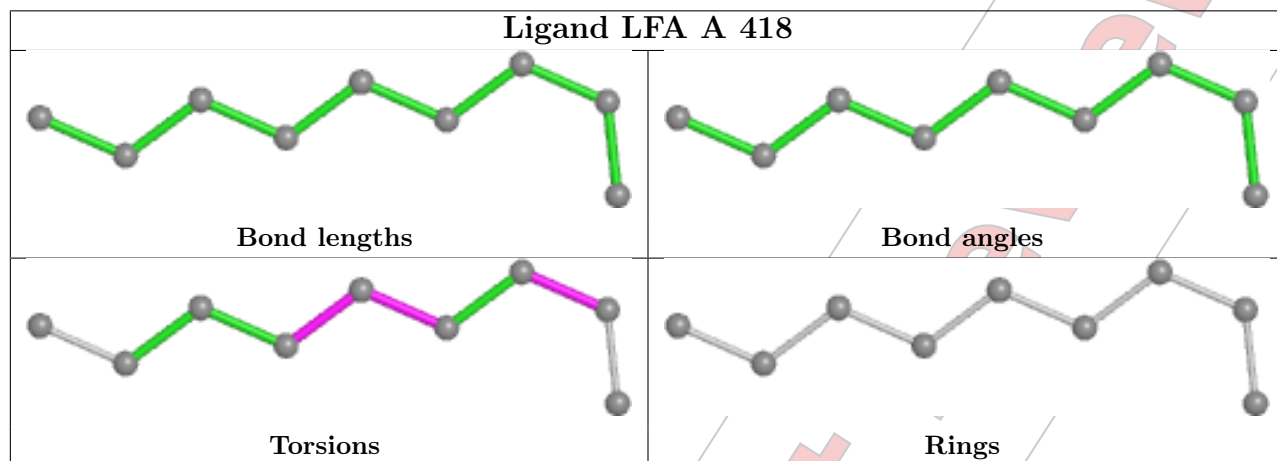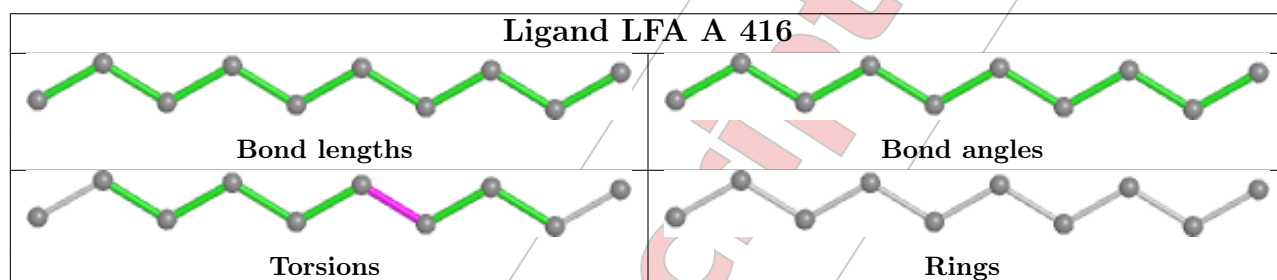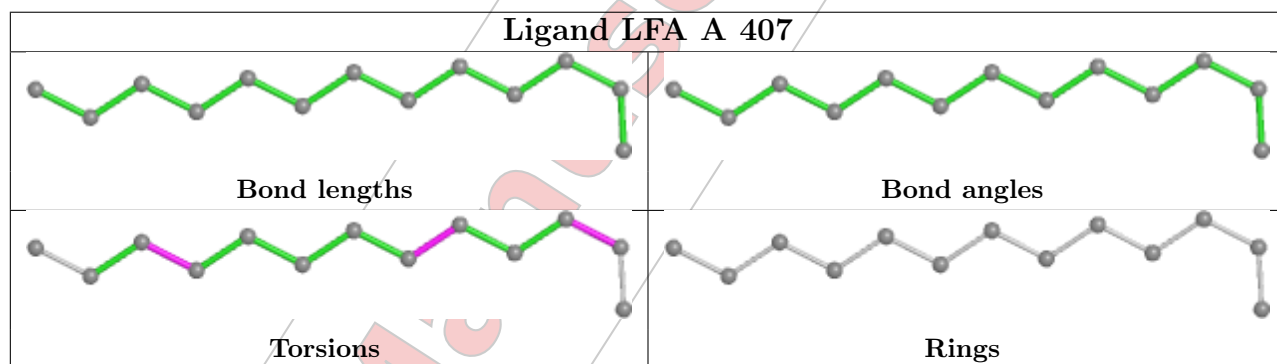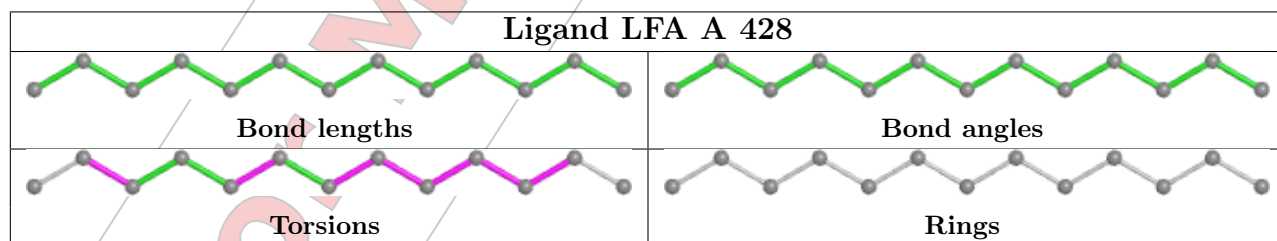

Not For Manuscript Review

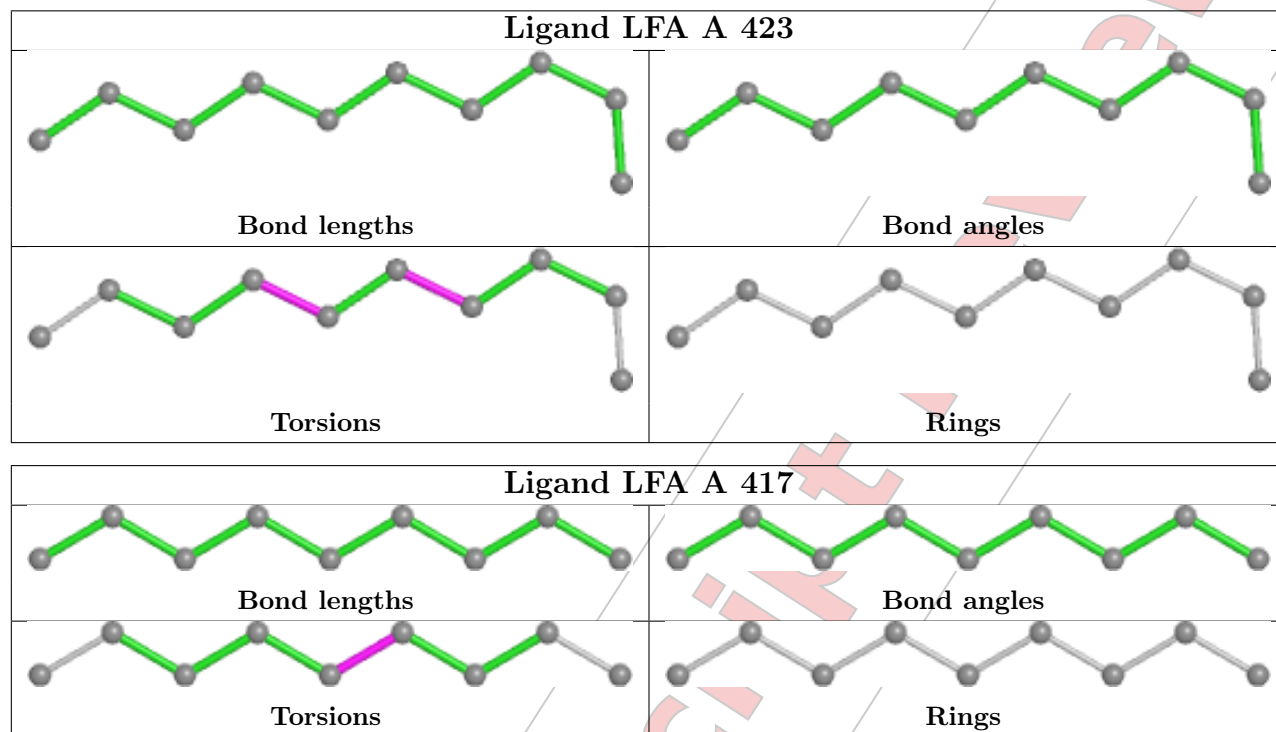

## 5.7 Other polymers [i](#)

There are no such residues in this entry.

## 5.8 Polymer linkage issues [i](#)

There are no chain breaks in this entry.

## 6 Fit of model and data [i](#)

### 6.1 Protein, DNA and RNA chains [i](#)

In the following table, the column labelled '#RSRZ > 2' contains the number (and percentage) of RSRZ outliers, followed by percent RSRZ outliers for the chain as percentile scores relative to all X-ray entries and entries of similar resolution. The OWAB column contains the minimum, median, 95<sup>th</sup> percentile and maximum values of the occupancy-weighted average B-factor per residue. The column labelled 'Q < 0.9' lists the number of (and percentage) of residues with an average occupancy less than 0.9.

| Mol | Chain | Analysed      | <RSRZ> | #RSRZ > 2                   | OWAB(Å <sup>2</sup> ) | Q < 0.9 |
|-----|-------|---------------|--------|-----------------------------|-----------------------|---------|
| 1   | A     | 264/265 (99%) | 0.40   | 20 (7%) <b>13</b> <b>12</b> | 15, 33, 69, 89        | 0       |

All (20) RSRZ outliers are listed below:

| Mol | Chain | Res | Type | RSRZ |
|-----|-------|-----|------|------|
| 1   | A     | 98  | ASP  | 3.2  |
| 1   | A     | 8   | ALA  | 3.1  |
| 1   | A     | 163 | ASN  | 3.1  |
| 1   | A     | 99  | PRO  | 3.0  |
| 1   | A     | 23  | ILE  | 2.9  |
| 1   | A     | 227 | LEU  | 2.9  |
| 1   | A     | 36  | TYR  | 2.8  |
| 1   | A     | 93  | GLY  | 2.7  |
| 1   | A     | 159 | TYR  | 2.5  |
| 1   | A     | 17  | THR  | 2.4  |
| 1   | A     | 225 | PRO  | 2.4  |
| 1   | A     | 195 | GLY  | 2.3  |
| 1   | A     | 84  | SER  | 2.3  |
| 1   | A     | 271 | LYS  | 2.2  |
| 1   | A     | 83  | THR  | 2.2  |
| 1   | A     | 30  | HIS  | 2.1  |
| 1   | A     | 198 | PRO  | 2.1  |
| 1   | A     | 162 | SER  | 2.0  |
| 1   | A     | 226 | TYR  | 2.0  |
| 1   | A     | 178 | PHE  | 2.0  |

### 6.2 Non-standard residues in protein, DNA, RNA chains [i](#)

There are no non-standard protein/DNA/RNA residues in this entry.

### 6.3 Carbohydrates [i](#)

There are no monosaccharides in this entry.

### 6.4 Ligands [i](#)

In the following table, the Atoms column lists the number of modelled atoms in the group and the number defined in the chemical component dictionary. The B-factors column lists the minimum, median, 95<sup>th</sup> percentile and maximum values of B factors of atoms in the group. The column labelled 'Q<0.9' lists the number of atoms with occupancy less than 0.9.

| Mol | Type | Chain | Res | Atoms | RSCC | RSR  | B-factors(Å <sup>2</sup> ) | Q<0.9 |
|-----|------|-------|-----|-------|------|------|----------------------------|-------|
| 2   | LFA  | A     | 414 | 10/?  | 0.17 | 0.54 | 53,76,95,100               | 0     |
| 2   | LFA  | A     | 412 | 11/?  | 0.24 | 0.50 | 53,61,70,73                | 0     |
| 2   | LFA  | A     | 424 | 3/?   | 0.25 | 0.35 | 57,57,57,68                | 0     |
| 2   | LFA  | A     | 422 | 6/?   | 0.26 | 0.55 | 50,66,73,78                | 0     |
| 2   | LFA  | A     | 427 | 12/?  | 0.36 | 0.48 | 36,56,64,66                | 0     |
| 2   | LFA  | A     | 403 | 8/?   | 0.48 | 0.48 | 34,35,39,39                | 8     |
| 2   | LFA  | A     | 417 | 9/?   | 0.51 | 0.55 | 57,71,77,83                | 0     |
| 2   | LFA  | A     | 415 | 5/?   | 0.53 | 0.42 | 34,36,47,51                | 0     |
| 2   | LFA  | A     | 416 | 10/?  | 0.53 | 0.40 | 48,50,57,58                | 0     |
| 2   | LFA  | A     | 413 | 5/?   | 0.55 | 0.40 | 46,49,58,61                | 0     |
| 2   | LFA  | A     | 410 | 8/?   | 0.56 | 0.43 | 40,43,48,56                | 0     |
| 2   | LFA  | A     | 411 | 12/?  | 0.59 | 0.49 | 52,58,60,70                | 0     |
| 2   | LFA  | A     | 423 | 10/?  | 0.59 | 0.40 | 41,46,53,56                | 0     |
| 2   | LFA  | A     | 418 | 9/?   | 0.60 | 0.26 | 37,47,50,51                | 0     |
| 2   | LFA  | A     | 407 | 13/?  | 0.63 | 0.28 | 36,42,52,53                | 0     |
| 2   | LFA  | A     | 428 | 13/?  | 0.64 | 0.26 | 65,79,82,83                | 40    |
| 2   | LFA  | A     | 420 | 5/?   | 0.66 | 0.23 | 39,44,51,55                | 0     |
| 2   | LFA  | A     | 426 | 10/?  | 0.66 | 0.32 | 44,48,57,58                | 0     |
| 2   | LFA  | A     | 425 | 9/?   | 0.67 | 0.56 | 41,54,76,79                | 0     |
| 2   | LFA  | A     | 405 | 6/?   | 0.70 | 0.24 | 47,52,56,58                | 0     |
| 2   | LFA  | A     | 419 | 6/?   | 0.73 | 0.47 | 38,45,57,58                | 0     |
| 2   | LFA  | A     | 404 | 6/?   | 0.75 | 0.20 | 41,45,51,51                | 0     |
| 2   | LFA  | A     | 421 | 4/?   | 0.76 | 0.36 | 35,36,44,49                | 0     |
| 2   | LFA  | A     | 408 | 10/?  | 0.79 | 0.31 | 32,37,44,46                | 0     |
| 2   | LFA  | A     | 402 | 16/?  | 0.80 | 0.18 | 30,39,46,46                | 0     |

The following is a graphical depiction of the model fit to experimental electron density of all instances of the Ligand of Interest. In addition, ligands with molecular weight > 250 and outliers as shown on the geometry validation Tables will also be included. Each fit is shown from different orientation to approximate a three-dimensional view.

**Electron density around LFA A 414:**

$2mF_o-DF_c$  (at 0.7 rmsd) in gray  
 $mF_o-DF_c$  (at 3 rmsd) in purple (negative)  
and green (positive)

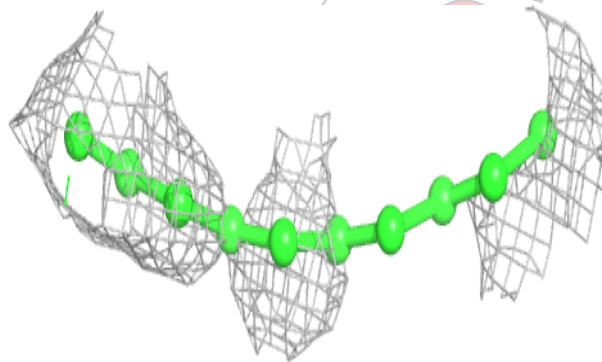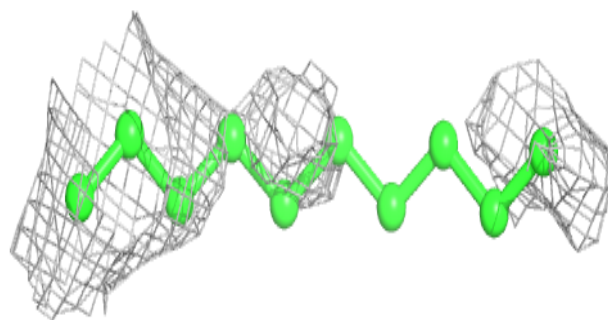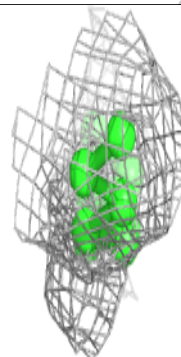

**Electron density around LFA A 412:**

$2mF_o-DF_c$  (at 0.7 rmsd) in gray  
 $mF_o-DF_c$  (at 3 rmsd) in purple (negative)  
and green (positive)

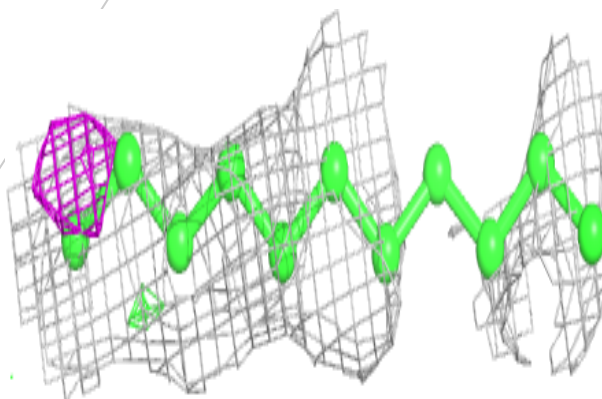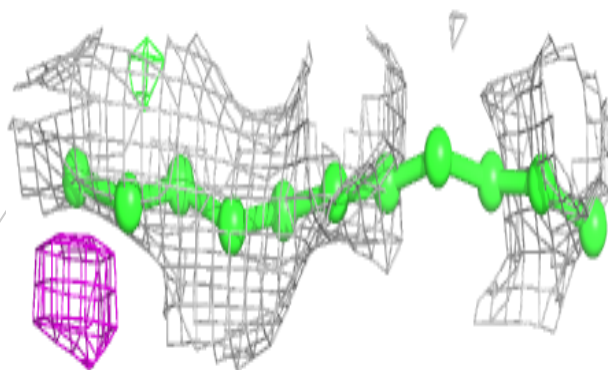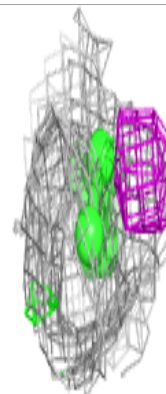

**Electron density around LFA A 422:**

$2mF_o-DF_c$  (at 0.7 rmsd) in gray  
 $mF_o-DF_c$  (at 3 rmsd) in purple (negative)  
 and green (positive)

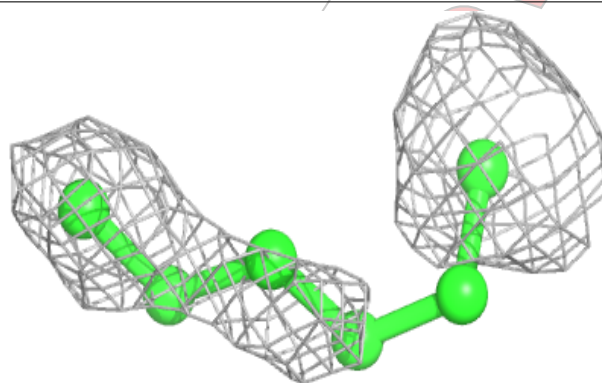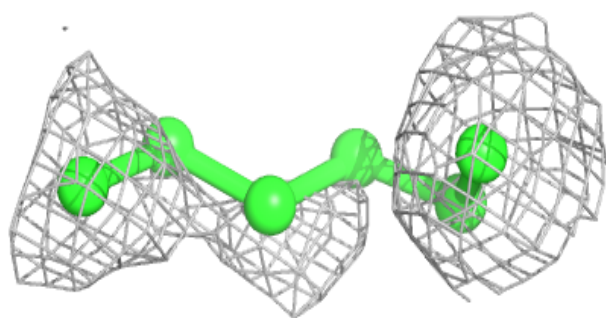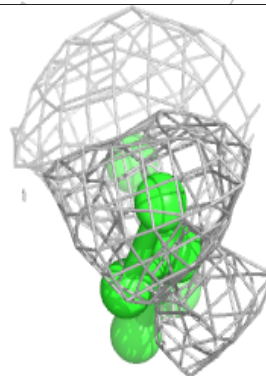

**Electron density around LFA A 427:**

$2mF_o-DF_c$  (at 0.7 rmsd) in gray  
 $mF_o-DF_c$  (at 3 rmsd) in purple (negative)  
 and green (positive)

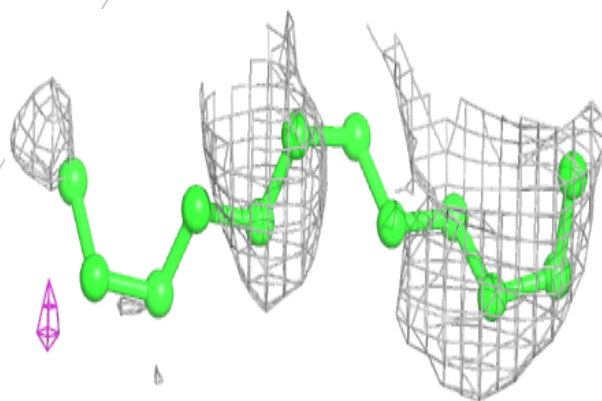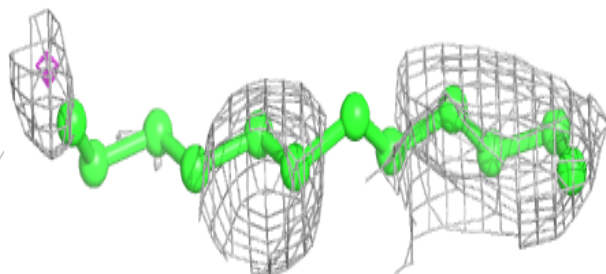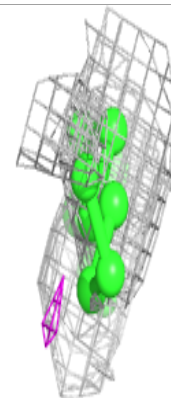

**Electron density around LFA A 403:**

$2mF_o-DF_c$  (at 0.7 rmsd) in gray  
 $mF_o-DF_c$  (at 3 rmsd) in purple (negative)  
and green (positive)

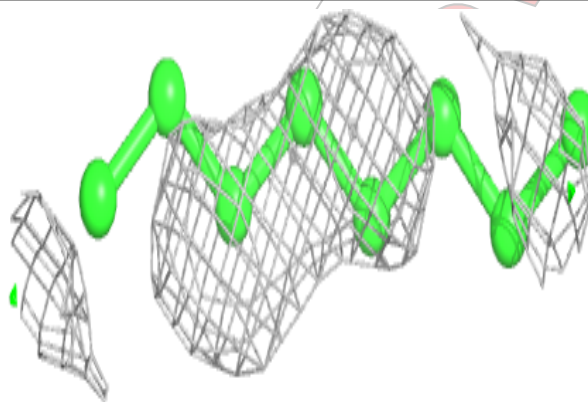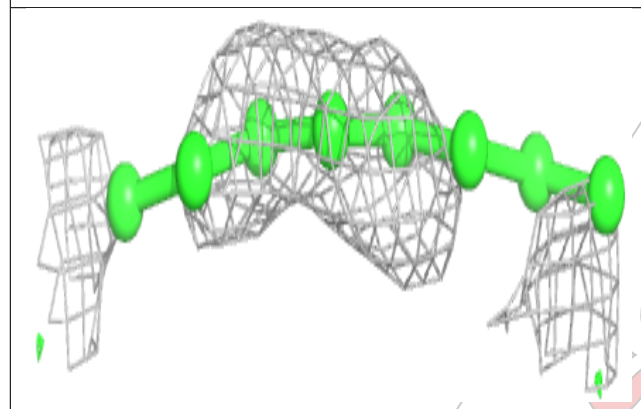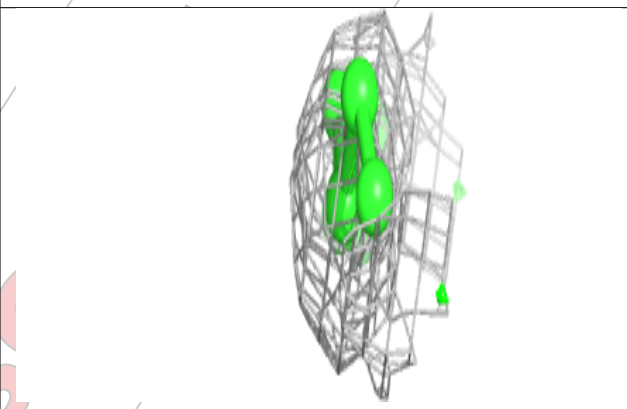

**Electron density around LFA A 417:**

$2mF_o-DF_c$  (at 0.7 rmsd) in gray  
 $mF_o-DF_c$  (at 3 rmsd) in purple (negative)  
and green (positive)

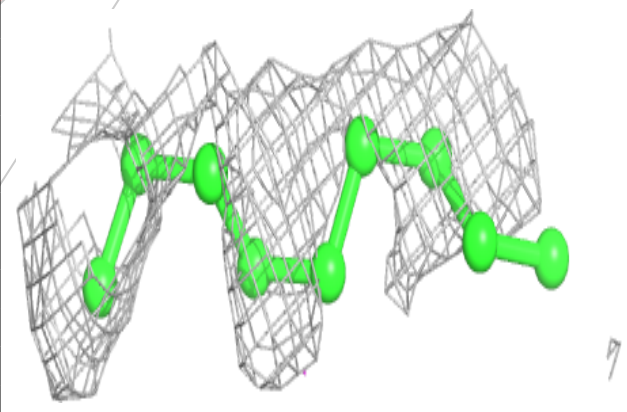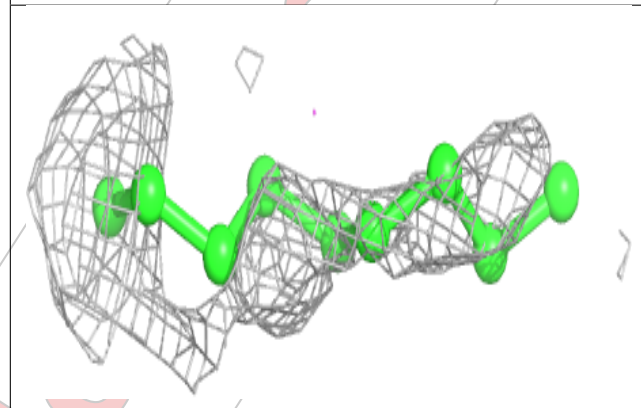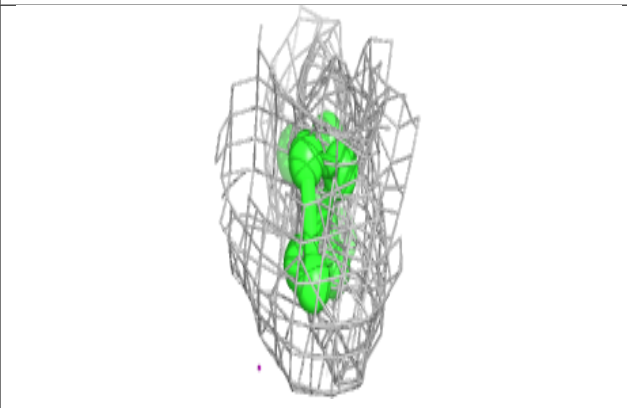

**Electron density around LFA A 415:**

$2mF_o-DF_c$  (at 0.7 rmsd) in gray  
 $mF_o-DF_c$  (at 3 rmsd) in purple (negative)  
 and green (positive)

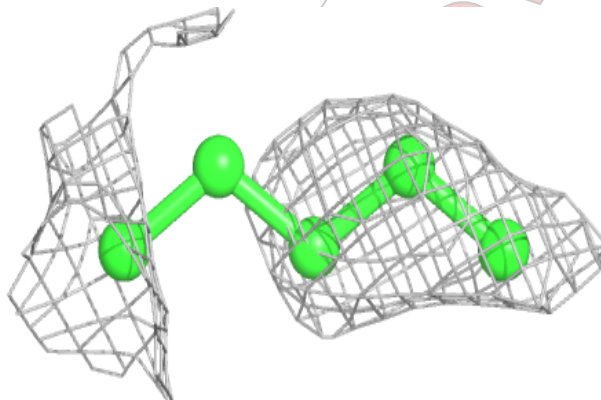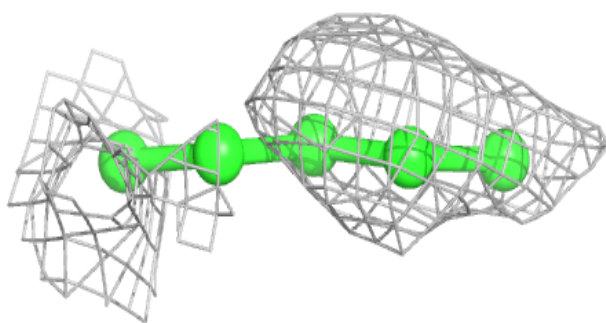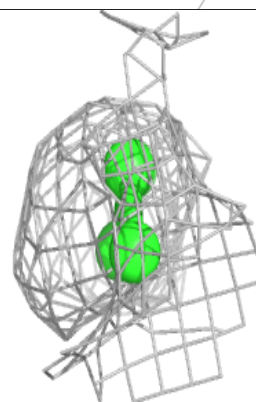

**Electron density around LFA A 416:**

$2mF_o-DF_c$  (at 0.7 rmsd) in gray  
 $mF_o-DF_c$  (at 3 rmsd) in purple (negative)  
 and green (positive)

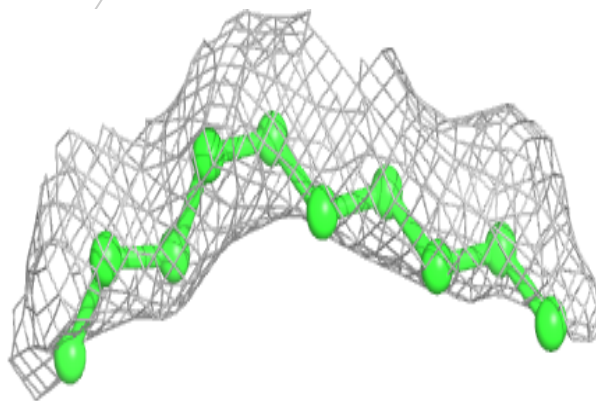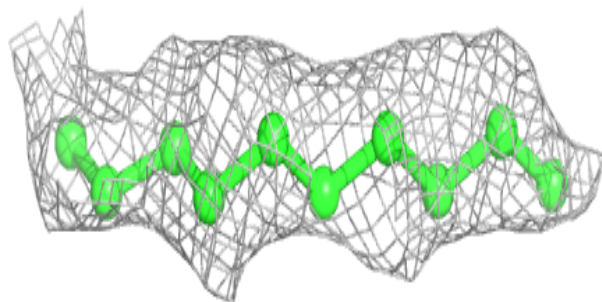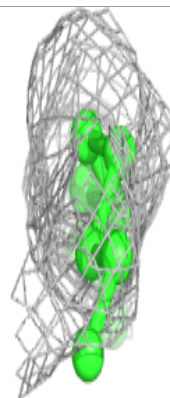

**Electron density around LFA A 410:**

$2mF_o-DF_c$  (at 0.7 rmsd) in gray  
 $mF_o-DF_c$  (at 3 rmsd) in purple (negative)  
 and green (positive)

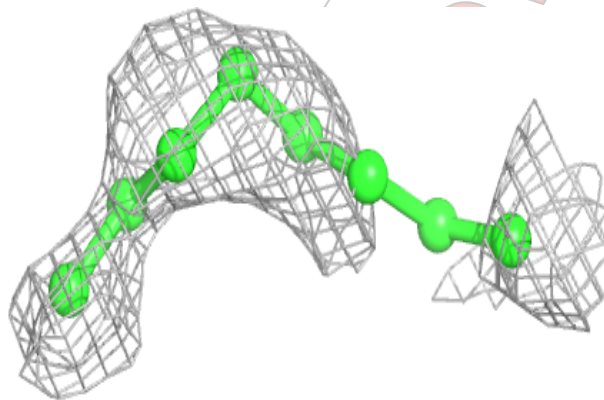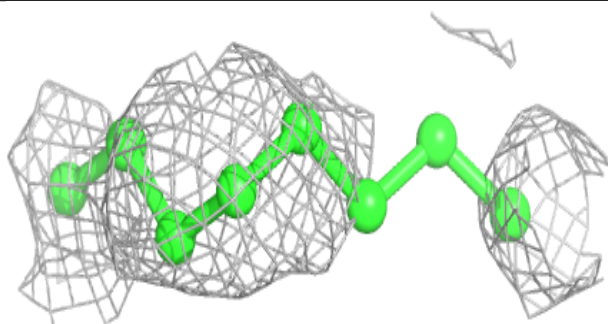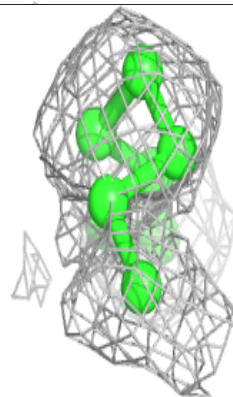

**Electron density around LFA A 411:**

$2mF_o-DF_c$  (at 0.7 rmsd) in gray  
 $mF_o-DF_c$  (at 3 rmsd) in purple (negative)  
 and green (positive)

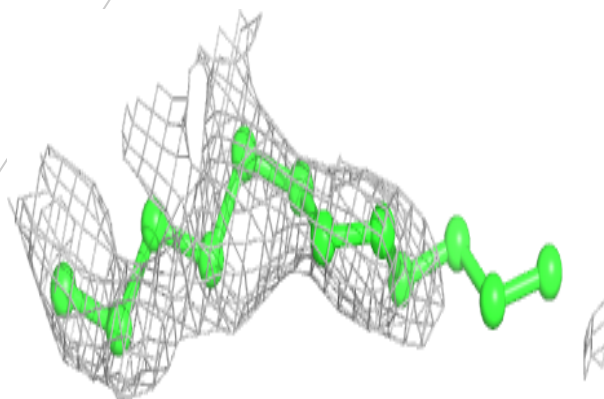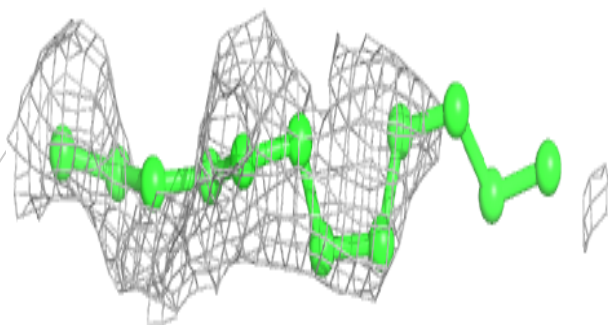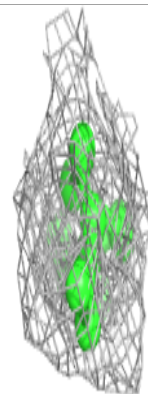

**Electron density around LFA A 423:**

$2mF_o-DF_c$  (at 0.7 rmsd) in gray  
 $mF_o-DF_c$  (at 3 rmsd) in purple (negative)  
and green (positive)

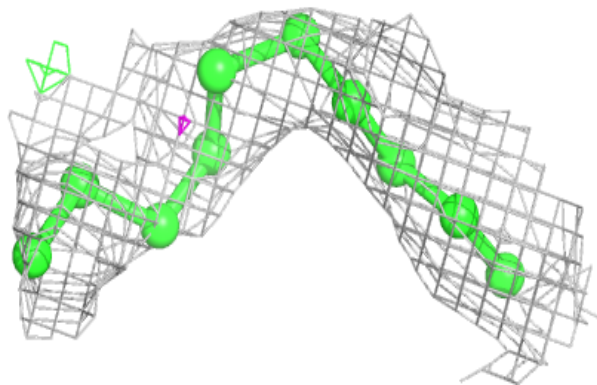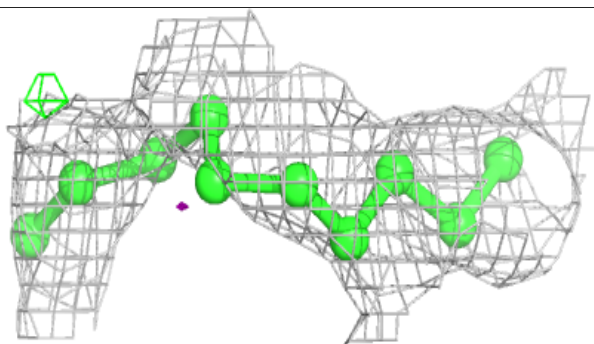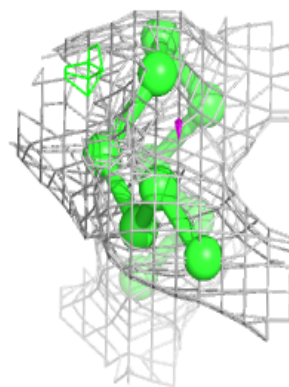

**Electron density around LFA A 418:**

$2mF_o-DF_c$  (at 0.7 rmsd) in gray  
 $mF_o-DF_c$  (at 3 rmsd) in purple (negative)  
and green (positive)

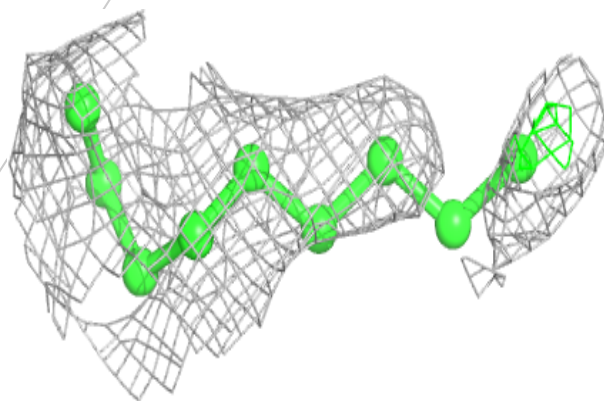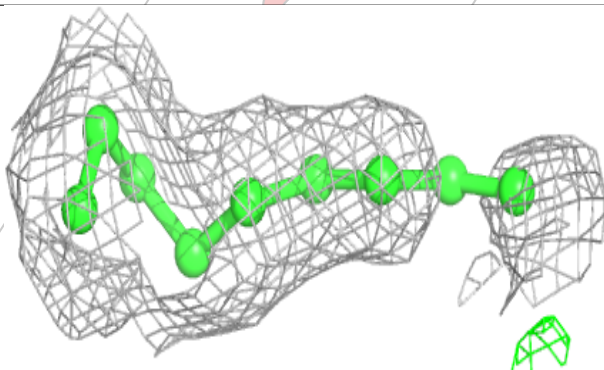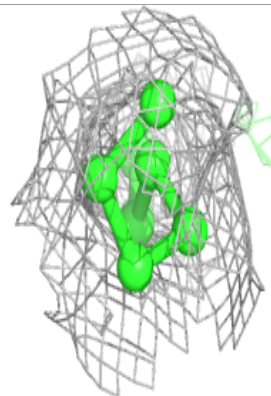

**Electron density around LFA A 407:**

$2mF_o-DF_c$  (at 0.7 rmsd) in gray  
 $mF_o-DF_c$  (at 3 rmsd) in purple (negative)  
 and green (positive)

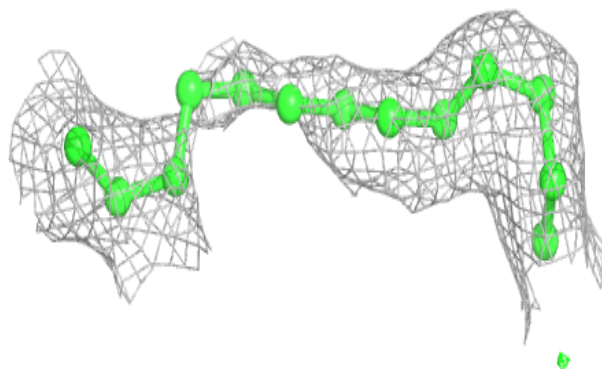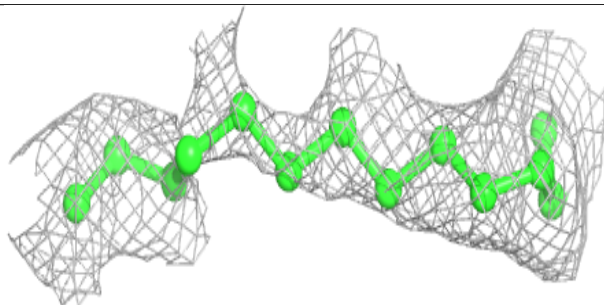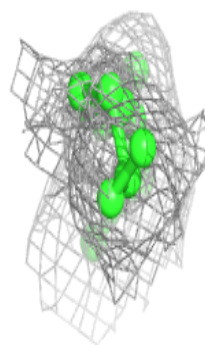

**Electron density around LFA A 428:**

$2mF_o-DF_c$  (at 0.7 rmsd) in gray  
 $mF_o-DF_c$  (at 3 rmsd) in purple (negative)  
 and green (positive)

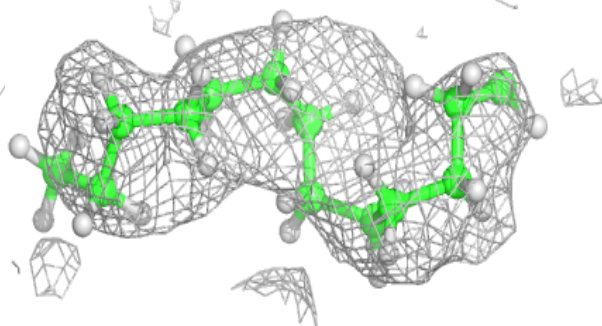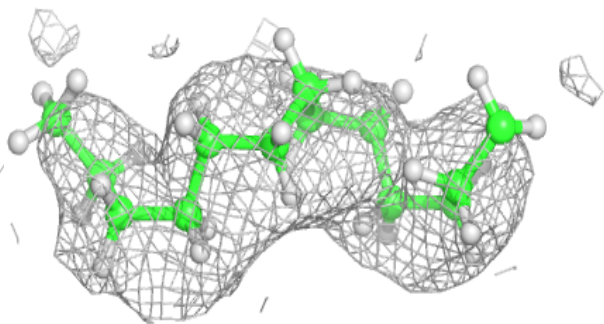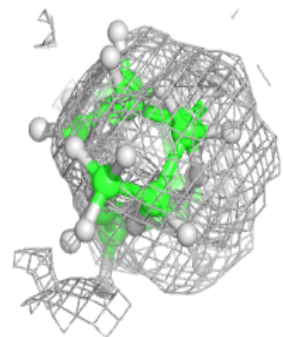

**Electron density around LFA A 426:**

$2mF_o-DF_c$  (at 0.7 rmsd) in gray  
 $mF_o-DF_c$  (at 3 rmsd) in purple (negative)  
and green (positive)

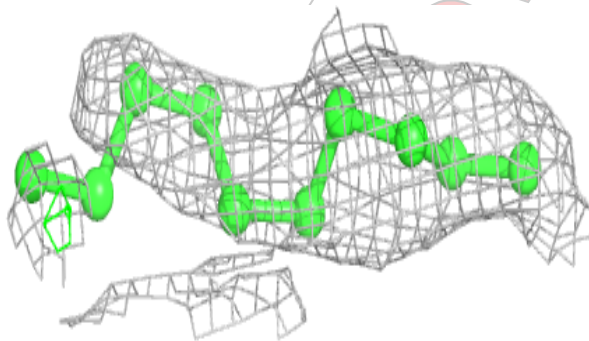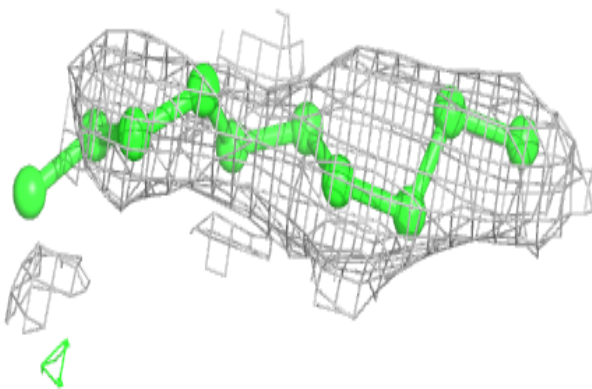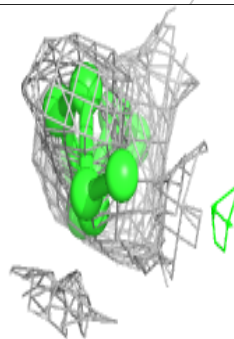

**Electron density around LFA A 425:**

$2mF_o-DF_c$  (at 0.7 rmsd) in gray  
 $mF_o-DF_c$  (at 3 rmsd) in purple (negative)  
and green (positive)

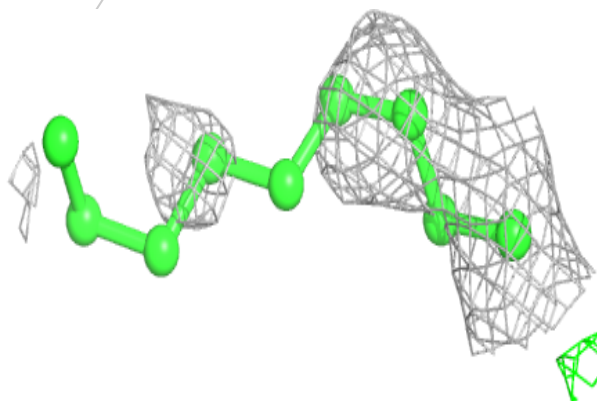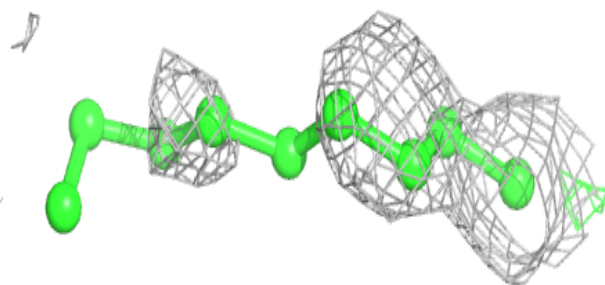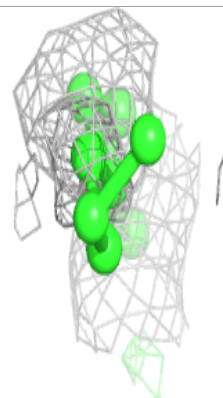

**Electron density around LFA A 419:**

$2mF_o-DF_c$  (at 0.7 rmsd) in gray  
 $mF_o-DF_c$  (at 3 rmsd) in purple (negative)  
and green (positive)

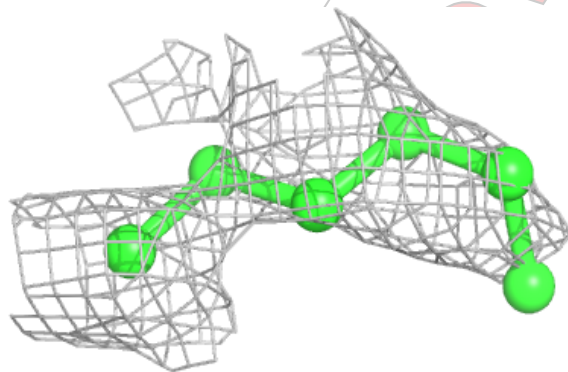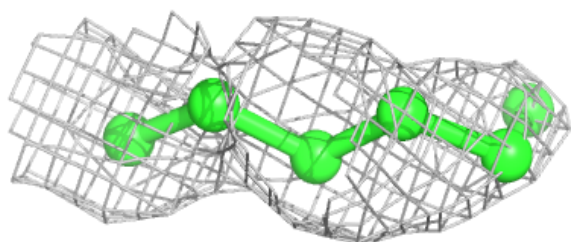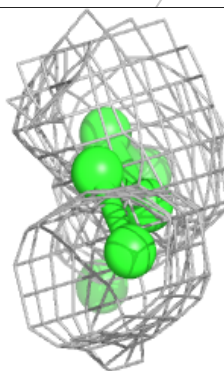

Not For Manuscript

**Electron density around LFA A 421:**

$2mF_o-DF_c$  (at 0.7 rmsd) in gray  
 $mF_o-DF_c$  (at 3 rmsd) in purple (negative)  
and green (positive)

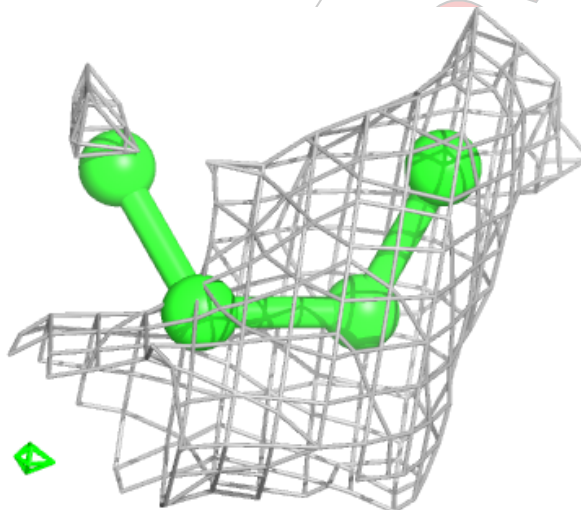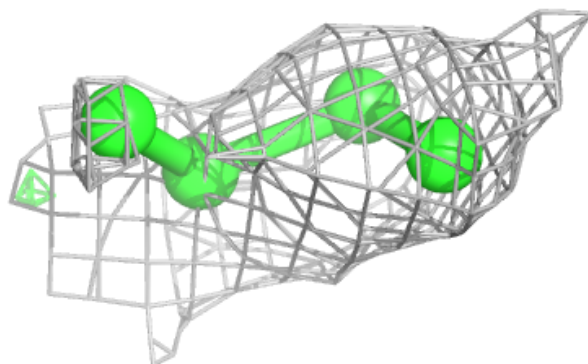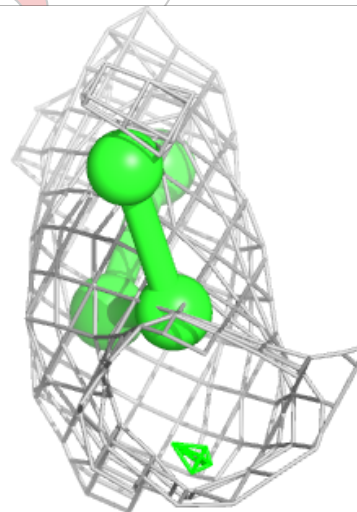

Not For Ma

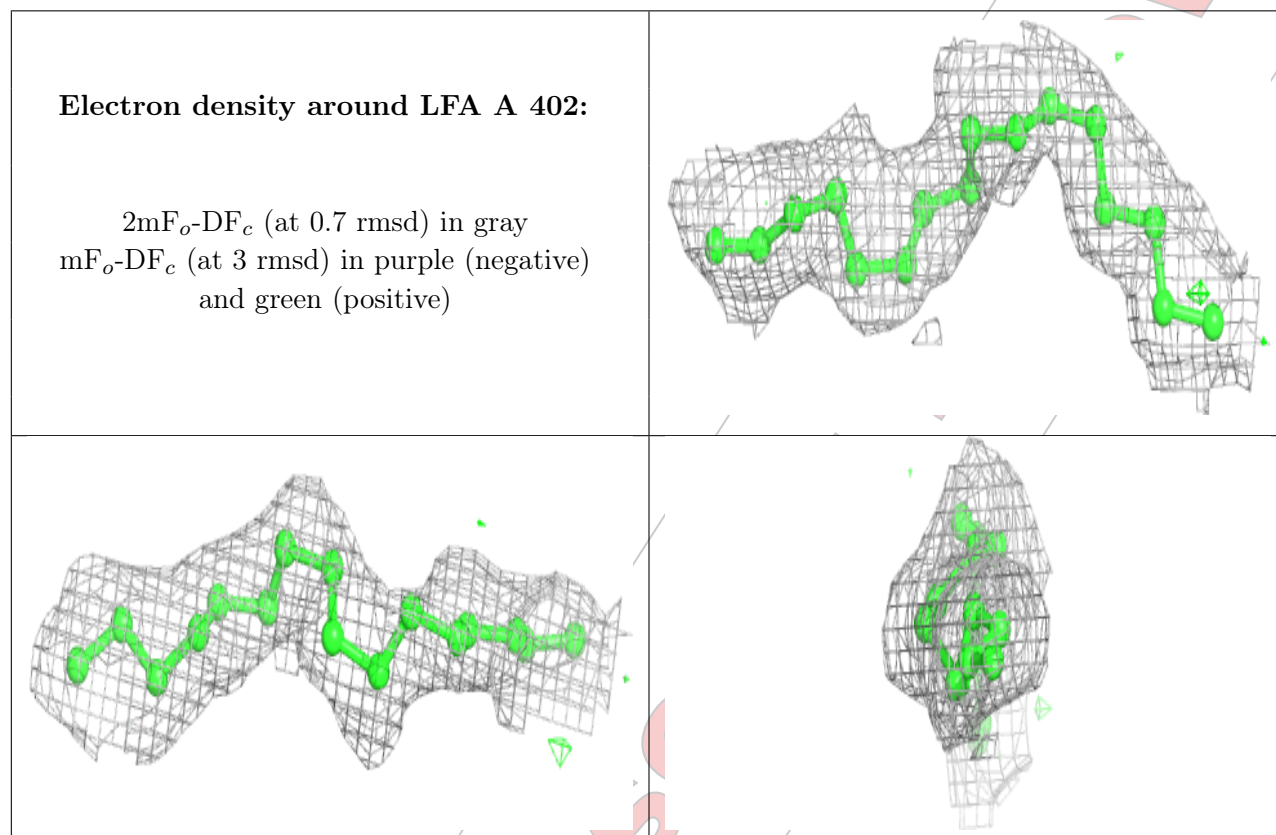

## 6.5 Other polymers [i](#)

There are no such residues in this entry.



# Preliminary Full wwPDB X-ray Structure Validation Report ⓘ

Feb 7, 2023 – 01:55 pm GMT

Deposition ID : D\_1292128496

**This wwPDB validation report is NOT for manuscript review**

This is a Preliminary Full wwPDB X-ray Structure Validation Report.

This report is produced by the wwPDB Deposition System during initial deposition but before annotation of the structure.

We welcome your comments at [validation@mail.wwpdb.org](mailto:validation@mail.wwpdb.org)

A user guide is available at

<https://www.wwpdb.org/validation/2017/XrayValidationReportHelp>

with specific help available everywhere you see the ⓘ symbol.

The types of validation reports are described at

<http://www.wwpdb.org/validation/2017/FAQs#types>.

---

The following versions of software and data (see [references ⓘ](#)) were used in the production of this report:

|                                |   |                                                                    |
|--------------------------------|---|--------------------------------------------------------------------|
| MolProbity                     | : | 4.02b-467                                                          |
| Mogul                          | : | 1.8.4, CSD as541be (2020)                                          |
| Xtrriage (Phenix)              | : | 1.13                                                               |
| EDS                            | : | 2.32.1                                                             |
| Percentile statistics          | : | 20191225.v01 (using entries in the PDB archive December 25th 2019) |
| Refmac                         | : | 5.8.0158                                                           |
| CCP4                           | : | 7.0.044 (Gargrove)                                                 |
| Ideal geometry (proteins)      | : | Engh & Huber (2001)                                                |
| Ideal geometry (DNA, RNA)      | : | Parkinson et al. (1996)                                            |
| Validation Pipeline (wwPDB-VP) | : | 2.32.1                                                             |

# 1 Overall quality at a glance i

The following experimental techniques were used to determine the structure:

*X-RAY DIFFRACTION*

The reported resolution of this entry is 1.76 Å.

Percentile scores (ranging between 0-100) for global validation metrics of the entry are shown in the following graphic. The table shows the number of entries on which the scores are based.

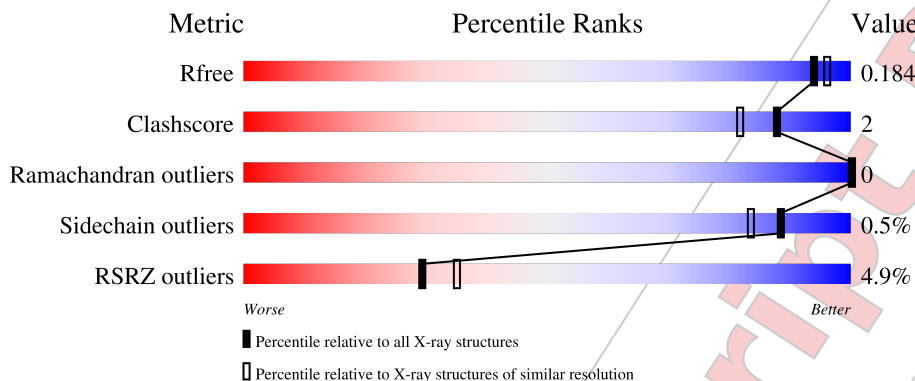

| Metric                | Whole archive<br>(#Entries) | Similar resolution<br>(#Entries, resolution range(Å)) |
|-----------------------|-----------------------------|-------------------------------------------------------|
| $R_{free}$            | 130704                      | 2340 (1.76-1.76)                                      |
| Clashscore            | 141614                      | 2466 (1.76-1.76)                                      |
| Ramachandran outliers | 138981                      | 2437 (1.76-1.76)                                      |
| Sidechain outliers    | 138945                      | 2437 (1.76-1.76)                                      |
| RSRZ outliers         | 127900                      | 2298 (1.76-1.76)                                      |

The table below summarises the geometric issues observed across the polymeric chains and their fit to the electron density. The red, orange, yellow and green segments of the lower bar indicate the fraction of residues that contain outliers for  $\geq 3$ , 2, 1 and 0 types of geometric quality criteria respectively. A grey segment represents the fraction of residues that are not modelled. The numeric value for each fraction is indicated below the corresponding segment, with a dot representing fractions  $\leq 5\%$ . The upper red bar (where present) indicates the fraction of residues that have poor fit to the electron density. The numeric value is given above the bar.

| Mol | Chain | Length | Quality of chain |
|-----|-------|--------|------------------|
| 1   | A     | 288    |                  |

## 2 Entry composition [i](#)

There are 2 unique types of molecules in this entry. The entry contains 5038 atoms, of which 2547 are hydrogens and 0 are deuteriums.

In the tables below, the ZeroOcc column contains the number of atoms modelled with zero occupancy, the AltConf column contains the number of residues with at least one atom in alternate conformation and the Trace column contains the number of residues modelled with at most 2 atoms.

- Molecule 1 is a protein called Krokinobacter eikastus rhodopsin 2.

| Mol | Chain | Residues | Atoms |      |      |     |     | ZeroOcc | AltConf | Trace |   |
|-----|-------|----------|-------|------|------|-----|-----|---------|---------|-------|---|
|     |       |          | Total | C    | H    | N   | O   |         |         |       | S |
| 1   | A     | 288      | 4928  | 1659 | 2547 | 329 | 383 | 10      | 0       | 12    | 0 |

- Molecule 2 is water.

| Mol | Chain | Residues | Atoms |     | ZeroOcc | AltConf |
|-----|-------|----------|-------|-----|---------|---------|
| 2   | S     | 109      | Total | O   | 0       | 4       |
|     |       |          | 110   | 110 |         |         |

### 3 Residue-property plots [i](#)

These plots are drawn for all protein, RNA, DNA and oligosaccharide chains in the entry. The first graphic for a chain summarises the proportions of the various outlier classes displayed in the second graphic. The second graphic shows the sequence view annotated by issues in geometry and electron density. Residues are color-coded according to the number of geometric quality criteria for which they contain at least one outlier: green = 0, yellow = 1, orange = 2 and red = 3 or more. A red dot above a residue indicates a poor fit to the electron density ( $RSRZ > 2$ ). Stretches of 2 or more consecutive residues without any outlier are shown as a green connector. Residues present in the sample, but not in the model, are shown in grey.

- Molecule 1: *Krokinobacter eikastus* rhodopsin 2

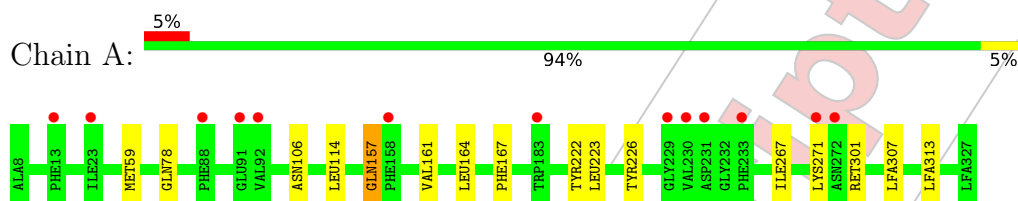

## 4 Data and refinement statistics i

| Property                                                                | Value                                                       | Source           |
|-------------------------------------------------------------------------|-------------------------------------------------------------|------------------|
| Space group                                                             | I 2 2 2                                                     | Depositor        |
| Cell constants<br>a, b, c, $\alpha$ , $\beta$ , $\gamma$                | 41.46Å 84.89Å 234.95Å<br>90.00° 90.00° 90.00°               | Depositor        |
| Resolution (Å)                                                          | 15.97 – 1.76<br>15.97 – 1.76                                | Depositor<br>EDS |
| % Data completeness<br>(in resolution range)                            | 68.8 (15.97-1.76)<br>68.7 (15.97-1.76)                      | Depositor<br>EDS |
| $R_{merge}$                                                             | (Not available)                                             | Depositor        |
| $R_{sym}$                                                               | (Not available)                                             | Depositor        |
| $\langle I/\sigma(I) \rangle$ <sup>1</sup>                              | 1.57 (at 1.76Å)                                             | Xtrriage         |
| Refinement program                                                      | PHENIX 1.20_4459                                            | Depositor        |
| R, $R_{free}$                                                           | 0.155 , 0.184<br>0.155 , 0.184                              | Depositor<br>DCC |
| $R_{free}$ test set                                                     | 2000 reflections (6.97%)                                    | wwPDB-VP         |
| Wilson B-factor (Å <sup>2</sup> )                                       | 25.8                                                        | Xtrriage         |
| Anisotropy                                                              | 0.103                                                       | Xtrriage         |
| Bulk solvent $k_{sol}$ (e/Å <sup>3</sup> ), $B_{sol}$ (Å <sup>2</sup> ) | 0.44 , 97.0                                                 | EDS              |
| L-test for twinning <sup>2</sup>                                        | $\langle  L  \rangle = 0.49$ , $\langle L^2 \rangle = 0.33$ | Xtrriage         |
| Estimated twinning fraction                                             | No twinning to report.                                      | Xtrriage         |
| $F_o, F_c$ correlation                                                  | 0.97                                                        | EDS              |
| Total number of atoms                                                   | 5038                                                        | wwPDB-VP         |
| Average B, all atoms (Å <sup>2</sup> )                                  | 44.0                                                        | wwPDB-VP         |

Xtrriage's analysis on translational NCS is as follows: *The largest off-origin peak in the Patterson function is 8.07% of the height of the origin peak. No significant pseudotranslation is detected.*

<sup>1</sup>Intensities estimated from amplitudes.

<sup>2</sup>Theoretical values of  $\langle |L| \rangle$ ,  $\langle L^2 \rangle$  for acentric reflections are 0.5, 0.333 respectively for untwinned datasets, and 0.375, 0.2 for perfectly twinned datasets.

## 5 Model quality [i](#)

### 5.1 Standard geometry [i](#)

Bond lengths and bond angles in the following residue types are not validated in this section: RET, LFA

The Z score for a bond length (or angle) is the number of standard deviations the observed value is removed from the expected value. A bond length (or angle) with  $|Z| > 5$  is considered an outlier worth inspection. RMSZ is the root-mean-square of all Z scores of the bond lengths (or angles).

| Mol | Chain | Bond lengths |         | Bond angles |         |
|-----|-------|--------------|---------|-------------|---------|
|     |       | RMSZ         | # Z  >5 | RMSZ        | # Z  >5 |
| 1   | A     | 0.50         | 0/2239  | 0.62        | 0/3046  |

There are no bond length outliers.

There are no bond angle outliers.

There are no chirality outliers.

There are no planarity outliers.

### 5.2 Too-close contacts [i](#)

In the following table, the Non-H and H(model) columns list the number of non-hydrogen atoms and hydrogen atoms in the chain respectively. The H(added) column lists the number of hydrogen atoms added and optimized by MolProbity. The Clashes column lists the number of clashes within the asymmetric unit, whereas Symm-Clashes lists symmetry-related clashes.

| Mol | Chain | Non-H | H(model) | H(added) | Clashes | Symm-Clashes |
|-----|-------|-------|----------|----------|---------|--------------|
| 1   | A     | 2381  | 2547     | 2514     | 10      | 0            |
| 2   | S     | 110   | 0        | 0        | 2       | 0            |
| All | All   | 2491  | 2547     | 2514     | 10      | 0            |

The all-atom clashscore is defined as the number of clashes found per 1000 atoms (including hydrogen atoms). The all-atom clashscore for this structure is 2.

All (10) close contacts within the same asymmetric unit are listed below, sorted by their clash magnitude.

| Atom-1           | Atom-2           | Interatomic distance (Å) | Clash overlap (Å) |
|------------------|------------------|--------------------------|-------------------|
| 1:A:301:RET:H8   | 1:A:301:RET:H161 | 1.70                     | 0.72              |
| 1:A:161:VAL:HG22 | 2:S:56:HOH:O     | 2.14                     | 0.46              |

*Continued on next page...*

Continued from previous page...

| Atom-1             | Atom-2          | Interatomic distance (Å) | Clash overlap (Å) |
|--------------------|-----------------|--------------------------|-------------------|
| 1:A:114:LEU:HD22   | 1:A:307:LFA:H31 | 1.98                     | 0.46              |
| 1:A:106[A]:ASN:ND2 | 1:A:157:GLN:OE1 | 2.48                     | 0.43              |
| 1:A:167:PHE:CE1    | 1:A:222:TYR:CZ  | 3.06                     | 0.43              |
| 1:A:164:LEU:HD13   | 1:A:226:TYR:CE2 | 2.53                     | 0.43              |
| 1:A:78[A]:GLN:NE2  | 2:S:58[A]:HOH:O | 2.52                     | 0.42              |
| 1:A:223:LEU:HD11   | 1:A:313:LFA:C1  | 2.51                     | 0.41              |
| 1:A:59:MET:HE2     | 1:A:59:MET:HA   | 2.03                     | 0.41              |
| 1:A:267:ILE:HG22   | 1:A:271:LYS:NZ  | 2.37                     | 0.40              |

There are no symmetry-related clashes.

### 5.3 Torsion angles [i](#)

#### 5.3.1 Protein backbone [i](#)

In the following table, the Percentiles column shows the percent Ramachandran outliers of the chain as a percentile score with respect to all X-ray entries followed by that with respect to entries of similar resolution.

The Analysed column shows the number of residues for which the backbone conformation was analysed, and the total number of residues.

| Mol | Chain | Analysed      | Favoured  | Allowed | Outliers | Percentiles |
|-----|-------|---------------|-----------|---------|----------|-------------|
| 1   | A     | 275/288 (96%) | 269 (98%) | 6 (2%)  | 0        | 100   100   |

There are no Ramachandran outliers to report.

#### 5.3.2 Protein sidechains [i](#)

In the following table, the Percentiles column shows the percent sidechain outliers of the chain as a percentile score with respect to all X-ray entries followed by that with respect to entries of similar resolution.

The Analysed column shows the number of residues for which the sidechain conformation was analysed, and the total number of residues.

| Mol | Chain | Analysed       | Rotameric  | Outliers | Percentiles |
|-----|-------|----------------|------------|----------|-------------|
| 1   | A     | 230/227 (101%) | 229 (100%) | 1 (0%)   | 91   87     |

All (1) residues with a non-rotameric sidechain are listed below:

| Mol | Chain | Res | Type |
|-----|-------|-----|------|
| 1   | A     | 157 | GLN  |

Sometimes sidechains can be flipped to improve hydrogen bonding and reduce clashes. All (1) such sidechains are listed below:

| Mol | Chain | Res | Type |
|-----|-------|-----|------|
| 1   | A     | 30  | HIS  |

### 5.3.3 RNA [i](#)

There are no RNA molecules in this entry.

### 5.4 Non-standard residues in protein, DNA, RNA chains [i](#)

There are no non-standard protein/DNA/RNA residues in this entry.

### 5.5 Carbohydrates [i](#)

There are no monosaccharides in this entry.

### 5.6 Ligand geometry [i](#)

There are no ligands in this entry.

### 5.7 Other polymers [i](#)

There are no such residues in this entry.

### 5.8 Polymer linkage issues [i](#)

There are no chain breaks in this entry.

## 6 Fit of model and data [i](#)

### 6.1 Protein, DNA and RNA chains [i](#)

In the following table, the column labelled '#RSRZ > 2' contains the number (and percentage) of RSRZ outliers, followed by percent RSRZ outliers for the chain as percentile scores relative to all X-ray entries and entries of similar resolution. The OWAB column contains the minimum, median, 95<sup>th</sup> percentile and maximum values of the occupancy-weighted average B-factor per residue. The column labelled 'Q < 0.9' lists the number of (and percentage) of residues with an average occupancy less than 0.9.

| Mol | Chain | Analysed      | <RSRZ> | #RSRZ > 2     | OWAB(Å <sup>2</sup> ) | Q < 0.9 |
|-----|-------|---------------|--------|---------------|-----------------------|---------|
| 1   | A     | 265/288 (92%) | -0.08  | 13 (4%) 29 35 | 14, 31, 66, 108       | 0       |

All (13) RSRZ outliers are listed below:

| Mol | Chain | Res | Type | RSRZ |
|-----|-------|-----|------|------|
| 1   | A     | 233 | PHE  | 6.9  |
| 1   | A     | 272 | ASN  | 5.6  |
| 1   | A     | 23  | ILE  | 4.4  |
| 1   | A     | 230 | VAL  | 4.4  |
| 1   | A     | 231 | ASP  | 3.2  |
| 1   | A     | 158 | PHE  | 3.0  |
| 1   | A     | 271 | LYS  | 2.9  |
| 1   | A     | 229 | GLY  | 2.8  |
| 1   | A     | 13  | PHE  | 2.7  |
| 1   | A     | 92  | VAL  | 2.6  |
| 1   | A     | 88  | PHE  | 2.3  |
| 1   | A     | 91  | GLU  | 2.1  |
| 1   | A     | 183 | TRP  | 2.1  |

### 6.2 Non-standard residues in protein, DNA, RNA chains [i](#)

There are no non-standard protein/DNA/RNA residues in this entry.

### 6.3 Carbohydrates [i](#)

There are no monosaccharides in this entry.

### 6.4 Ligands [i](#)

There are no ligands in this entry.

## 6.5 Other polymers [i](#)

There are no such residues in this entry.

Not For Manuscript Review
